# Supplementary material for: Empirical single-cell tracking and cell-fate simulation reveal dual roles of p53 in tumor suppression
Source: eLife. 2022 Sep 20;11:e72498. doi: 10.7554/eLife.72498 (PMC9560164; doi:10.7554/eLife.72498)
Supplement: Figure 1—figure supplement 2—source data 1. — Data used in Figure 1—figure supplement 2. [file elife-72498-fig1-figsupp2-data1.xlsx]

## Sheet: Figure 1-supplement 2a
Dimension	mm		Area	mm2
X	276.6			61508.2
Y	222.4
Time min x10	Number of cells		Aerage cell size (mm2)	Number of cells/mm2
0	96		640.708	0.00156077
1	95		647.453	0.00154451
2	98		627.633	0.00159329
3	100		615.08	0.0016258
4	101		608.99	0.00164206
5	101		608.99	0.00164206
6	102		603.02	0.00165832
7	101		608.99	0.00164206
8	102		603.02	0.00165832
9	102		603.02	0.00165832
10	102		603.02	0.00165832
11	102		603.02	0.00165832
12	101		608.99	0.00164206
13	102		603.02	0.00165832
14	104		591.423	0.00169084
15	104		591.423	0.00169084
16	104		591.423	0.00169084
17	106		580.264	0.00172335
18	106		580.264	0.00172335
19	103		597.165	0.00167458
20	106		580.264	0.00172335
21	107		574.841	0.00173961
22	108		569.519	0.00175587
23	107		574.841	0.00173961
24	107		574.841	0.00173961
25	106		580.264	0.00172335
26	106		580.264	0.00172335
27	106		580.264	0.00172335
28	106		580.264	0.00172335
29	106		580.264	0.00172335
30	105		585.79	0.0017071
31	102		603.02	0.00165832
32	105		585.79	0.0017071
33	108		569.519	0.00175587
34	106		580.264	0.00172335
35	107		574.841	0.00173961
36	111		554.126	0.00180464
37	114		539.544	0.00185342
38	114		539.544	0.00185342
39	117		525.709	0.00190219
40	116		530.241	0.00188593
41	115		534.852	0.00186968
42	116		530.241	0.00188593
43	116		530.241	0.00188593
44	117		525.709	0.00190219
45	116		530.241	0.00188593
46	115		534.852	0.00186968
47	114		539.544	0.00185342
48	115		534.852	0.00186968
49	116		530.241	0.00188593
50	117		525.709	0.00190219
51	117		525.709	0.00190219
52	117		525.709	0.00190219
53	116		530.241	0.00188593
54	115		534.852	0.00186968
55	116		530.241	0.00188593
56	119		516.874	0.00193471
57	119		516.874	0.00193471
58	120		512.567	0.00195097
59	119		516.874	0.00193471
60	119		516.874	0.00193471
61	119		516.874	0.00193471
62	120		512.567	0.00195097
63	119		516.874	0.00193471
64	119		516.874	0.00193471
65	120		512.567	0.00195097
66	120		512.567	0.00195097
67	120		512.567	0.00195097
68	120		512.567	0.00195097
69	120		512.567	0.00195097
70	119		516.874	0.00193471
71	119		516.874	0.00193471
72	120		512.567	0.00195097
73	120		512.567	0.00195097
74	119		516.874	0.00193471
75	119		516.874	0.00193471
76	121		508.331	0.00196722
77	121		508.331	0.00196722
78	120		512.567	0.00195097
79	120		512.567	0.00195097
80	120		512.567	0.00195097
81	120		512.567	0.00195097
82	120		512.567	0.00195097
83	120		512.567	0.00195097
84	121		508.331	0.00196722
85	121		508.331	0.00196722
86	121		508.331	0.00196722
87	121		508.331	0.00196722
88	121		508.331	0.00196722
89	120		512.567	0.00195097
90	119		516.874	0.00193471
91	119		516.874	0.00193471
92	118		521.254	0.00191845
93	118		521.254	0.00191845
94	118		521.254	0.00191845
95	120		512.567	0.00195097
96	121		508.331	0.00196722
97	121		508.331	0.00196722
98	122		504.164	0.00198348
99	122		504.164	0.00198348
100	122		504.164	0.00198348
101	121		508.331	0.00196722
102	121		508.331	0.00196722
103	121		508.331	0.00196722
104	121		508.331	0.00196722
105	122		504.164	0.00198348
106	124		496.032	0.002016
107	125		492.064	0.00203226
108	126		488.159	0.00204851
109	127		484.315	0.00206477
110	126		488.159	0.00204851
111	127		484.315	0.00206477
112	127		484.315	0.00206477
113	127		484.315	0.00206477
114	127		484.315	0.00206477
115	127		484.315	0.00206477
116	127		484.315	0.00206477
117	128		480.531	0.00208103
118	128		480.531	0.00208103
119	129		476.806	0.00209729
120	130		473.138	0.00211355
121	130		473.138	0.00211355
122	131		469.527	0.0021298
123	131		469.527	0.0021298
124	132		465.97	0.00214606
125	133		462.466	0.00216232
126	133		462.466	0.00216232
127	133		462.466	0.00216232
128	135		455.615	0.00219484
129	136		452.265	0.00221109
130	136		452.265	0.00221109
131	136		452.265	0.00221109
132	136		452.265	0.00221109
133	137		448.964	0.00222735
134	136		452.265	0.00221109
135	138		445.71	0.00224361
136	137		448.964	0.00222735
137	136		452.265	0.00221109
138	136		452.265	0.00221109
139	135		455.615	0.00219484
140	135		455.615	0.00219484
141	134		459.015	0.00217858
142	135		455.615	0.00219484
143	136		452.265	0.00221109
144	137		448.964	0.00222735
145	137		448.964	0.00222735
146	135		455.615	0.00219484
147	136		452.265	0.00221109
148	137		448.964	0.00222735
149	138		445.71	0.00224361
150	140		439.343	0.00227613
151	140		439.343	0.00227613
152	142		433.155	0.00230864
153	142		433.155	0.00230864
154	144		427.139	0.00234116
155	143		430.126	0.0023249
156	142		433.155	0.00230864
157	143		430.126	0.0023249
158	144		427.139	0.00234116
159	146		421.288	0.00237367
160	145		424.193	0.00235742
161	145		424.193	0.00235742
162	146		421.288	0.00237367
163	149		412.805	0.00242245
164	149		412.805	0.00242245
165	153		402.013	0.00248748
166	151		407.338	0.00245497
167	151		407.338	0.00245497
168	151		407.338	0.00245497
169	152		404.658	0.00247122
170	151		407.338	0.00245497
171	152		404.658	0.00247122
172	152		404.658	0.00247122
173	153		402.013	0.00248748
174	154		399.403	0.00250374
175	153		402.013	0.00248748
176	153		402.013	0.00248748
177	154		399.403	0.00250374
178	156		394.282	0.00253626
179	155		396.826	0.00252
180	157		391.771	0.00255251
181	158		389.291	0.00256877
182	159		386.843	0.00258503
183	160		384.425	0.00260129
184	160		384.425	0.00260129
185	160		384.425	0.00260129
186	161		382.037	0.00261755
187	162		379.679	0.0026338
188	163		377.35	0.00265006
189	163		377.35	0.00265006
190	167		368.311	0.00271509
191	167		368.311	0.00271509
192	168		366.119	0.00273135
193	166		370.53	0.00269884
194	168		366.119	0.00273135
195	167		368.311	0.00271509
196	167		368.311	0.00271509
197	168		366.119	0.00273135
198	168		366.119	0.00273135
199	171		359.696	0.00278013
200	171		359.696	0.00278013
201	171		359.696	0.00278013
202	174		353.494	0.0028289
203	176		349.477	0.00286142
204	173		355.538	0.00281264
205	175		351.474	0.00284516
206	175		351.474	0.00284516
207	174		353.494	0.0028289
208	173		355.538	0.00281264
209	176		349.477	0.00286142
210	176		349.477	0.00286142
211	179		343.62	0.00291019
212	181		339.823	0.00294271
213	181		339.823	0.00294271
214	180		341.711	0.00292645
215	180		341.711	0.00292645
216	179		343.62	0.00291019
217	180		341.711	0.00292645
218	178		345.551	0.00289393
219	178		345.551	0.00289393
220	178		345.551	0.00289393
221	180		341.711	0.00292645
222	182		337.956	0.00295896
223	182		337.956	0.00295896
224	183		336.109	0.00297522
225	185		332.476	0.00300774
226	186		330.688	0.003024
227	185		332.476	0.00300774
228	186		330.688	0.003024
229	186		330.688	0.003024
230	186		330.688	0.003024
231	188		327.17	0.00305651
232	189		325.439	0.00307277
233	191		322.031	0.00310529
234	190		323.726	0.00308903
235	195		315.426	0.00317032
236	196		313.816	0.00318658
237	195		315.426	0.00317032
238	196		313.816	0.00318658
239	200		307.54	0.00325161
240	201		306.01	0.00326787
241	205		300.039	0.0033329
242	204		301.51	0.00331664
243	204		301.51	0.00331664
244	204		301.51	0.00331664
245	205		300.039	0.0033329
246	205		300.039	0.0033329
247	204		301.51	0.00331664
248	207		297.14	0.00336542
249	207		297.14	0.00336542
250	206		298.583	0.00334916
251	206		298.583	0.00334916
252	208		295.712	0.00338167
253	209		294.297	0.00339793
254	210		292.895	0.00341419
255	209		294.297	0.00339793
256	209		294.297	0.00339793
257	210		292.895	0.00341419
258	212		290.132	0.00344671
259	210		292.895	0.00341419
260	213		288.77	0.00346296
261	213		288.77	0.00346296
262	213		288.77	0.00346296
263	213		288.77	0.00346296
264	214		287.421	0.00347922
265	215		286.084	0.00349548
266	214		287.421	0.00347922
267	215		286.084	0.00349548
268	215		286.084	0.00349548
269	216		284.759	0.00351174
270	217		283.447	0.003528
271	216		284.759	0.00351174
272	216		284.759	0.00351174
273	217		283.447	0.003528
274	216		284.759	0.00351174
275	215		286.084	0.00349548
276	213		288.77	0.00346296
277	214		287.421	0.00347922
278	215		286.084	0.00349548
279	214		287.421	0.00347922
280	215		286.084	0.00349548
281	216		284.759	0.00351174
282	218		282.147	0.00354425
283	220		279.582	0.00357677
284	220		279.582	0.00357677
285	220		279.582	0.00357677
286	221		278.317	0.00359303
287	222		277.063	0.00360929
288	222		277.063	0.00360929
289	221		278.317	0.00359303
290	221		278.317	0.00359303
291	221		278.317	0.00359303
292	223		275.821	0.00362554
293	223		275.821	0.00362554
294	225		273.369	0.00365806
295	226		272.159	0.00367432
296	225		273.369	0.00365806
297	222		277.063	0.00360929
298	225		273.369	0.00365806
299	225		273.369	0.00365806
300	224		274.589	0.0036418
301	226		272.159	0.00367432
302	226		272.159	0.00367432
303	226		272.159	0.00367432
304	228		269.772	0.00370683
305	228		269.772	0.00370683
306	228		269.772	0.00370683
307	227		270.96	0.00369058
308	228		269.772	0.00370683
309	228		269.772	0.00370683
310	228		269.772	0.00370683
311	229		268.594	0.00372309
312	231		266.268	0.00375561
313	232		265.121	0.00377187
314	233		263.983	0.00378813
315	232		265.121	0.00377187
316	233		263.983	0.00378813
317	233		263.983	0.00378813
318	233		263.983	0.00378813
319	233		263.983	0.00378813
320	234		262.855	0.00380438
321	239		257.356	0.00388567
322	241		255.22	0.00391819
323	243		253.119	0.00395071
324	242		254.165	0.00393445
325	245		251.053	0.00398322
326	247		249.02	0.00401574
327	247		249.02	0.00401574
328	244		252.082	0.00396696
329	244		252.082	0.00396696
330	243		253.119	0.00395071
331	247		249.02	0.00401574
332	246		250.033	0.00399948
333	246		250.033	0.00399948
334	246		250.033	0.00399948
335	246		250.033	0.00399948
336	246		250.033	0.00399948
337	248		248.016	0.004032
338	249		247.02	0.00404825
339	249		247.02	0.00404825
340	250		246.032	0.00406451
341	250		246.032	0.00406451
342	250		246.032	0.00406451
343	250		246.032	0.00406451
344	251		245.052	0.00408077
345	252		244.079	0.00409703
346	257		239.331	0.00417832
347	258		238.403	0.00419458
348	258		238.403	0.00419458
349	259		237.483	0.00421083
350	260		236.569	0.00422709
351	259		237.483	0.00421083
352	258		238.403	0.00419458
353	259		237.483	0.00421083
354	257		239.331	0.00417832
355	255		241.208	0.0041458
356	254		242.157	0.00412954
357	254		242.157	0.00412954
358	256		240.266	0.00416206
359	255		241.208	0.0041458
360	255		241.208	0.0041458
361	253		243.115	0.00411329
362	255		241.208	0.0041458
363	255		241.208	0.0041458
364	256		240.266	0.00416206
365	258		238.403	0.00419458
366	259		237.483	0.00421083
367	261		235.663	0.00424335
368	261		235.663	0.00424335
369	262		234.763	0.00425961
370	262		234.763	0.00425961
371	263		233.871	0.00427587
372	264		232.985	0.00429212
373	266		231.233	0.00432464
374	263		233.871	0.00427587
375	263		233.871	0.00427587
376	262		234.763	0.00425961
377	263		233.871	0.00427587
378	264		232.985	0.00429212
379	265		232.106	0.00430838
380	268		229.507	0.00435716
381	268		229.507	0.00435716
382	269		228.654	0.00437341
383	268		229.507	0.00435716
384	269		228.654	0.00437341
385	270		227.807	0.00438967
386	270		227.807	0.00438967
387	272		226.132	0.00442219
388	274		224.482	0.00445471
389	273		225.304	0.00443845
390	278		221.252	0.00451974
391	274		224.482	0.00445471
392	279		220.459	0.004536
393	279		220.459	0.004536
394	280		219.671	0.00455225
395	282		218.113	0.00458477
396	282		218.113	0.00458477
397	283		217.343	0.00460103
398	284		216.577	0.00461729
399	283		217.343	0.00460103
400	283		217.343	0.00460103
