# Supplementary material for: Empirical single-cell tracking and cell-fate simulation reveal dual roles of p53 in tumor suppression
Source: eLife. 2022 Sep 20;11:e72498. doi: 10.7554/eLife.72498 (PMC9560164; doi:10.7554/eLife.72498)
Supplement: Figure 1—figure supplement 3—source data 1. — Data used in Figure 1—figure supplement 3. [file elife-72498-fig1-figsupp3-data1.xlsx]

## Sheet: Figure 1-supplement 3
Source data																																										Normalized to 100
	Number of lineages																																										Number of lineages
	50	50	50	60	60	60	70	70	70	80	80	80	90	90	90	100	100	100	110	110	110	120	120	120	130	130	130	140	140	140	150	150	150	175	175	175	240	240	240				50	50	50	60	60	60	70
Time min x10	Number of cells																																									Time min x10	Number of cells
0	50	50	51	61	60	60	71	70	70	80	81	81	92	90	90	102	100	101	112	110	101	122	121	120	132	131	130	142	141	139	151	151	151	176	177	176	242	242	243			0	100	100	100	100	100	100	84.507
1	50	50	51	61	60	60	71	70	70	80	81	81	92	90	90	102	100	101	112	110	101	122	121	120	132	131	130	142	141	139	151	151	151	176	177	176	242	242	243			1	100	100	100	100	100	100	84.507
2	50	50	51	61	60	60	71	70	70	80	81	81	92	90	90	102	100	101	112	110	101	122	121	120	132	131	130	142	141	139	151	151	151	176	177	176	242	242	243			2	100	100	100	100	100	100	84.507
3	50	51	51	61	61	60	71	70	71	80	81	84	94	90	90	103	101	103	113	111	102	123	123	121	133	134	130	147	141	139	152	153	152	178	178	177	244	245	245			3	100	102	100	100	101.667	100	85.9155
4	50	51	51	61	61	60	71	70	71	80	81	85	94	90	90	104	101	103	113	112	102	123	124	121	133	134	130	148	141	139	153	153	152	178	178	177	244	245	246			4	100	102	100	100	101.667	100	85.9155
5	50	51	51	61	61	60	71	70	71	80	81	85	94	90	90	104	101	103	113	112	102	123	124	121	133	134	130	148	141	139	153	153	152	178	178	177	244	245	246			5	100	102	100	100	101.667	100	85.9155
6	50	51	52	61	62	60	71	70	72	80	81	85	94	90	91	104	101	104	113	113	103	123	125	121	133	134	131	149	141	140	153	154	153	179	179	178	245	246	247			6	100	102	101.961	100	103.333	100	87.3239
7	50	51	52	60	62	61	71	70	72	80	81	84	94	91	91	104	101	103	113	113	103	122	126	121	132	134	132	149	140	141	152	154	154	178	180	178	244	246	247			7	100	102	101.961	98.3607	103.333	101.667	87.3239
8	50	51	52	60	62	61	71	70	73	80	81	84	94	91	92	105	101	103	113	114	103	122	126	121	132	134	132	150	140	141	152	154	155	178	181	178	244	246	248			8	100	102	101.961	98.3607	103.333	101.667	87.3239
9	50	51	52	60	63	61	71	71	75	82	82	85	95	91	93	106	101	105	115	114	105	123	127	121	132	136	135	152	141	143	153	155	158	179	184	178	245	249	250			9	100	102	101.961	98.3607	105	101.667	88.7324
10	50	51	52	60	64	61	71	71	76	84	82	85	96	91	93	106	101	106	115	115	105	123	128	122	133	137	135	153	141	144	153	155	160	180	185	179	247	249	252			10	100	102	101.961	98.3607	106.667	101.667	90.1408
11	50	51	52	60	64	61	71	71	76	84	82	85	96	91	93	106	101	106	115	115	105	123	128	122	133	137	135	153	141	144	153	155	160	180	185	179	247	249	252			11	100	102	101.961	98.3607	106.667	101.667	90.1408
12	51	51	52	61	64	61	71	71	76	84	82	86	96	91	93	106	101	106	116	115	105	123	129	122	134	137	135	153	141	145	153	155	161	181	185	180	248	250	252			12	102	102	101.961	100	106.667	101.667	90.1408
13	51	51	52	61	64	61	71	71	76	84	82	86	96	91	93	106	101	106	116	115	105	123	129	122	134	137	135	153	141	145	153	155	161	181	185	180	248	250	252			13	102	102	101.961	100	106.667	101.667	90.1408
14	51	51	52	61	64	61	71	71	76	85	82	86	96	91	94	106	101	106	116	115	105	123	130	122	134	137	135	153	142	145	153	155	161	181	185	180	248	251	252			14	102	102	101.961	100	106.667	101.667	90.1408
15	52	51	52	61	64	62	71	71	76	85	82	86	96	91	94	106	101	107	116	115	105	123	131	123	134	137	135	153	142	146	153	155	161	181	186	181	249	251	253			15	104	102	101.961	100	106.667	103.333	90.1408
16	52	51	52	61	64	62	71	71	77	85	82	86	97	91	94	106	101	108	116	115	106	123	132	123	134	137	136	153	143	146	153	156	161	181	187	181	249	251	254			16	104	102	101.961	100	106.667	103.333	90.1408
17	52	51	52	61	64	62	72	71	77	85	83	86	98	91	94	107	101	108	116	115	106	123	132	124	134	138	136	154	143	146	154	156	161	181	188	181	249	252	254			17	104	102	101.961	100	106.667	103.333	90.1408
18	52	52	52	61	64	63	72	72	77	86	84	86	98	91	94	108	101	109	118	116	106	123	133	124	134	138	136	155	144	147	155	157	162	182	189	182	250	252	257			18	104	104	101.961	100	106.667	105	90.1408
19	52	52	53	61	64	65	72	74	77	86	84	86	98	91	94	108	101	110	118	117	106	124	134	125	135	138	137	155	145	148	156	157	163	183	190	183	251	253	258			19	104	104	103.922	100	106.667	108.333	90.1408
20	52	53	53	61	65	66	72	74	78	87	85	86	100	91	94	109	101	110	118	119	107	125	135	126	136	138	139	156	146	149	159	157	163	185	190	184	252	256	258			20	104	106	103.922	100	108.333	110	91.5493
21	53	53	53	62	65	66	73	74	78	87	85	86	101	92	95	109	101	111	120	119	107	126	135	128	137	138	139	158	146	151	159	158	166	186	191	185	254	257	261			21	106	106	103.922	101.639	108.333	110	91.5493
22	53	53	53	62	65	66	73	74	78	87	85	87	101	92	95	109	101	111	120	119	107	127	135	129	137	138	140	159	146	151	159	159	166	186	192	185	254	257	262			22	106	106	103.922	101.639	108.333	110	91.5493
23	53	53	53	62	65	66	73	74	78	87	85	87	101	92	95	109	101	111	120	119	107	127	135	129	137	138	140	159	146	151	159	159	166	186	192	185	254	257	262			23	106	106	103.922	101.639	108.333	110	91.5493
24	53	53	53	62	66	66	73	74	79	87	87	87	101	94	96	109	101	111	120	121	107	128	135	129	138	138	141	160	146	152	159	162	166	187	193	186	255	259	263			24	106	106	103.922	101.639	110	110	92.9577
25	53	53	53	62	66	66	73	74	79	87	87	87	101	94	96	109	101	111	120	121	107	128	135	129	138	138	141	160	146	152	159	162	166	187	193	186	255	259	263			25	106	106	103.922	101.639	110	110	92.9577
26	54	53	53	62	66	67	73	74	79	88	87	88	102	94	97	109	102	112	121	121	108	129	136	130	139	138	141	161	146	152	161	162	166	188	193	187	256	260	264			26	108	106	103.922	101.639	110	111.667	92.9577
27	54	53	53	62	66	67	73	74	79	88	87	88	102	94	97	109	102	112	121	121	108	129	136	130	139	138	141	161	146	152	161	162	166	188	193	187	256	260	264			27	108	106	103.922	101.639	110	111.667	92.9577
28	54	53	53	63	66	67	73	74	79	89	87	88	102	94	98	109	102	112	121	121	108	129	137	131	139	139	141	161	147	152	162	162	166	189	193	187	257	260	265			28	108	106	103.922	103.279	110	111.667	92.9577
29	54	53	53	63	66	67	73	75	79	89	87	88	103	94	98	110	102	112	121	121	108	129	137	132	139	140	141	161	148	152	163	162	166	189	194	188	258	261	265			29	108	106	103.922	103.279	110	111.667	92.9577
30	54	53	53	63	66	67	73	75	79	89	87	88	103	94	98	110	102	112	121	121	108	129	137	132	139	140	141	161	148	152	163	162	166	189	194	188	258	261	265			30	108	106	103.922	103.279	110	111.667	92.9577
31	54	54	53	64	66	67	74	75	79	89	87	87	102	94	98	109	102	113	122	122	107	130	136	132	141	139	141	160	149	153	163	163	166	190	194	189	260	261	266			31	108	108	103.922	104.918	110	111.667	92.9577
32	54	54	53	64	66	68	74	75	79	89	88	87	102	95	98	109	103	113	123	122	107	130	136	132	141	139	142	160	149	154	163	164	166	191	194	189	260	262	266			32	108	108	103.922	104.918	110	113.333	92.9577
33	55	54	53	64	67	68	74	75	79	89	89	87	102	95	99	109	103	113	124	122	107	130	136	132	141	139	142	160	150	154	164	164	166	192	194	190	261	262	267			33	110	108	103.922	104.918	111.667	113.333	94.3662
34	55	54	53	64	67	68	74	75	79	89	89	87	102	95	99	109	103	113	124	122	107	130	136	132	141	139	142	160	150	154	164	164	166	192	194	190	261	262	267			34	110	108	103.922	104.918	111.667	113.333	94.3662
35	55	54	53	64	67	69	74	76	79	89	90	87	102	96	99	109	103	114	124	124	107	131	136	132	141	140	142	161	150	154	165	165	166	192	195	190	261	263	268			35	110	108	103.922	104.918	111.667	115	94.3662
36	56	54	54	64	67	69	74	76	80	89	90	88	102	96	101	111	104	114	124	125	108	132	137	133	143	140	144	161	152	156	166	168	166	193	197	192	264	265	270			36	112	108	105.882	104.918	111.667	115	94.3662
37	57	54	54	64	67	69	74	76	80	89	92	88	102	97	101	111	105	115	125	125	108	132	139	133	143	141	145	161	154	156	166	168	167	193	199	193	265	266	271			37	114	108	105.882	104.918	111.667	115	94.3662
38	57	54	55	64	67	70	74	77	81	89	93	88	103	97	101	112	105	115	126	125	108	132	140	133	144	143	145	161	156	157	167	169	168	194	200	194	266	267	273			38	114	108	107.843	104.918	111.667	116.667	94.3662
39	57	54	55	64	67	70	74	77	81	89	93	88	104	97	101	112	106	115	126	125	108	132	140	133	144	143	146	161	157	157	168	169	168	194	200	194	266	267	274			39	114	108	107.843	104.918	111.667	116.667	94.3662
40	57	54	55	63	68	70	74	79	81	89	94	89	104	98	102	113	106	115	126	124	108	133	140	135	143	143	147	162	157	157	168	169	169	195	200	195	267	268	274			40	114	108	107.843	103.279	113.333	116.667	95.7746
41	57	54	55	63	68	70	74	79	81	89	95	89	104	98	102	114	106	115	126	124	108	133	140	135	143	144	147	163	157	157	168	170	169	195	200	195	267	269	274			41	114	108	107.843	103.279	113.333	116.667	95.7746
42	57	54	55	63	68	70	74	80	81	89	95	90	104	98	102	114	106	116	126	125	108	134	140	135	144	144	147	164	157	157	168	171	169	195	201	195	267	269	275			42	114	108	107.843	103.279	113.333	116.667	95.7746
43	58	54	55	64	68	70	74	80	81	89	96	90	104	99	102	115	106	116	127	125	108	136	140	136	145	145	147	166	157	157	170	171	169	196	201	196	269	270	276			43	116	108	107.843	104.918	113.333	116.667	95.7746
44	58	54	55	64	69	70	74	80	82	90	96	90	104	99	102	115	106	116	127	125	108	136	140	136	145	145	147	167	157	157	170	171	170	197	201	196	269	270	277			44	116	108	107.843	104.918	115	116.667	97.1831
45	58	54	55	64	69	70	74	80	82	91	96	90	104	100	103	115	106	116	128	126	108	136	142	136	146	145	148	168	157	158	171	171	171	197	201	196	269	272	277			45	116	108	107.843	104.918	115	116.667	97.1831
46	59	54	55	66	69	70	74	80	82	91	96	89	104	100	103	116	106	116	127	127	109	137	141	137	147	144	149	167	158	159	172	170	173	199	200	197	271	274	277			46	118	108	107.843	108.197	115	116.667	97.1831
47	59	54	55	66	69	70	74	80	83	91	96	89	104	100	104	117	106	117	129	127	109	138	141	137	147	145	150	168	159	159	172	172	173	199	201	197	271	276	277			47	118	108	107.843	108.197	115	116.667	97.1831
48	59	54	56	66	69	70	75	80	83	91	96	90	104	101	104	117	107	117	130	127	109	139	141	138	148	146	150	169	160	159	172	172	175	199	202	198	272	278	277			48	118	108	109.804	108.197	115	116.667	97.1831
49	59	54	57	66	69	70	75	80	83	92	97	90	104	102	104	117	107	118	131	127	110	141	141	139	149	147	151	170	162	159	173	172	176	199	203	199	273	280	278			49	118	108	111.765	108.197	115	116.667	97.1831
50	59	54	57	66	69	70	75	80	83	92	97	90	104	102	104	117	107	118	131	127	110	141	141	139	149	147	151	170	162	159	173	172	176	199	203	199	273	280	278			50	118	108	111.765	108.197	115	116.667	97.1831
51	59	54	57	66	69	70	75	80	83	92	97	90	104	102	105	117	107	118	131	127	110	141	142	140	149	148	151	170	163	159	173	172	176	199	204	199	273	280	279			51	118	108	111.765	108.197	115	116.667	97.1831
52	59	54	57	66	70	71	75	81	84	94	97	90	104	102	106	117	107	118	132	128	110	142	142	140	151	148	151	172	163	159	174	172	177	201	204	199	274	281	280			52	118	108	111.765	108.197	116.667	118.333	98.5915
53	59	54	57	66	70	71	76	81	84	95	97	92	105	102	106	118	108	118	134	128	110	142	142	141	152	149	151	172	165	159	176	173	177	201	205	200	275	282	282			53	118	108	111.765	108.197	116.667	118.333	98.5915
54	59	54	57	66	70	71	76	81	84	95	98	92	105	104	107	120	108	118	136	128	110	145	142	142	154	149	151	172	165	162	177	175	177	201	206	200	275	283	284			54	118	108	111.765	108.197	116.667	118.333	98.5915
55	59	54	57	66	70	71	76	81	84	95	98	92	105	104	107	120	108	118	136	128	110	145	142	142	154	149	151	172	165	162	177	175	177	201	206	200	275	283	284			55	118	108	111.765	108.197	116.667	118.333	98.5915
56	59	54	57	66	70	71	77	81	84	96	99	92	105	105	107	121	108	118	136	128	111	147	142	143	154	150	152	173	165	163	178	175	178	201	208	200	275	285	284			56	118	108	111.765	108.197	116.667	118.333	98.5915
57	59	54	57	66	70	71	77	81	84	96	99	92	105	105	107	121	108	118	136	128	111	147	142	143	154	150	152	173	165	163	178	175	178	201	208	200	275	285	284			57	118	108	111.765	108.197	116.667	118.333	98.5915
58	59	54	57	66	70	71	77	82	84	96	101	92	107	106	107	122	109	119	136	129	112	148	142	144	155	151	152	173	167	164	178	177	179	201	209	200	275	285	287			58	118	108	111.765	108.197	116.667	118.333	98.5915
59	59	54	57	66	70	72	77	82	85	96	101	92	107	106	108	122	110	119	136	130	112	149	142	144	155	151	153	173	167	165	178	178	179	201	210	200	275	285	288			59	118	108	111.765	108.197	116.667	120	98.5915
60	60	54	57	67	70	72	77	82	85	96	101	92	107	106	108	122	110	119	136	130	112	149	142	145	155	152	153	173	167	166	178	178	180	202	210	201	276	286	288			60	120	108	111.765	109.836	116.667	120	98.5915
61	60	54	58	68	70	72	79	82	85	97	101	92	107	106	109	123	110	119	136	130	112	149	143	145	155	153	153	174	168	166	178	179	181	203	211	202	277	288	288			61	120	108	113.725	111.475	116.667	120	98.5915
62	61	54	58	68	70	72	79	82	85	97	101	92	107	106	109	124	110	119	136	131	112	149	144	146	155	155	153	174	168	168	179	180	181	203	211	203	278	290	288			62	122	108	113.725	111.475	116.667	120	98.5915
63	61	54	58	68	70	72	79	82	86	97	102	92	107	107	109	124	111	119	136	132	112	149	145	146	156	155	153	174	169	168	179	180	182	203	212	204	279	291	288			63	122	108	113.725	111.475	116.667	120	98.5915
64	61	54	59	69	70	73	80	82	86	97	102	93	109	107	109	125	112	119	136	134	113	149	145	146	157	155	154	175	170	169	181	181	182	206	212	205	281	292	290			64	122	108	115.686	113.115	116.667	121.667	98.5915
65	61	54	59	69	71	73	81	82	86	98	102	93	110	107	110	125	113	119	138	134	113	150	145	146	157	157	154	175	171	169	181	183	182	207	213	205	282	294	290			65	122	108	115.686	113.115	118.333	121.667	100
66	61	54	59	70	71	74	81	83	86	98	103	94	110	110	110	126	113	120	138	134	114	151	146	148	157	158	154	177	172	169	182	184	183	208	215	205	283	296	291			66	122	108	115.686	114.754	118.333	123.333	100
67	61	55	59	71	71	74	82	83	86	98	103	95	111	111	110	127	114	120	139	135	115	151	147	148	158	159	154	177	175	169	184	184	184	209	216	206	285	298	292			67	122	110	115.686	116.393	118.333	123.333	100
68	61	55	59	71	71	76	82	83	88	99	103	96	111	112	110	128	115	120	141	136	116	151	149	149	159	159	155	178	177	169	186	184	185	211	217	206	285	298	296			68	122	110	115.686	116.393	118.333	126.667	100
69	61	55	59	71	71	76	82	83	88	99	103	96	111	112	110	128	115	120	141	136	116	151	149	149	159	159	155	178	177	169	186	184	185	211	217	206	285	298	296			69	122	110	115.686	116.393	118.333	126.667	100
70	61	55	59	71	71	76	82	83	88	99	103	96	111	112	110	128	115	120	141	136	116	151	149	149	159	159	155	178	177	169	186	184	185	211	217	206	285	298	296			70	122	110	115.686	116.393	118.333	126.667	100
71	61	55	59	71	71	76	82	83	88	99	103	96	111	112	110	128	115	120	141	136	116	151	149	149	159	159	155	178	177	169	186	184	185	211	217	206	285	298	296			71	122	110	115.686	116.393	118.333	126.667	100
72	61	55	60	71	72	77	82	83	88	99	103	96	111	112	110	129	115	121	141	136	118	152	149	150	160	160	156	178	177	172	186	186	186	213	217	207	286	300	297			72	122	110	117.647	116.393	120	128.333	101.408
73	61	55	60	71	72	78	83	83	88	100	103	97	111	113	111	129	116	121	141	136	118	152	149	151	162	160	156	178	177	174	187	186	186	215	217	208	287	300	299			73	122	110	117.647	116.393	120	130	101.408
74	61	55	61	71	72	78	83	83	88	100	103	97	112	113	111	129	117	121	141	136	119	153	149	151	162	160	157	178	178	174	188	186	186	215	217	209	288	301	299			74	122	110	119.608	116.393	120	130	101.408
75	61	55	61	71	72	78	83	83	88	100	103	97	112	113	111	129	117	121	141	136	119	153	149	151	162	160	157	178	178	174	188	186	186	215	217	209	288	301	299			75	122	110	119.608	116.393	120	130	101.408
76	61	55	61	72	72	78	83	84	88	101	103	97	113	114	111	129	118	121	141	136	120	154	149	152	164	160	157	178	179	174	189	186	187	216	218	209	289	303	299			76	122	110	119.608	118.033	120	130	101.408
77	61	55	61	72	72	78	83	84	88	101	103	97	113	114	111	129	118	121	141	136	120	154	149	152	164	160	157	178	179	174	189	186	187	216	218	209	289	303	299			77	122	110	119.608	118.033	120	130	101.408
78	62	56	62	72	72	78	84	85	88	101	105	97	113	114	112	130	118	122	141	137	120	154	151	152	166	160	158	178	181	174	191	187	187	217	219	212	292	304	301			78	124	112	121.569	118.033	120	130	101.408
79	62	56	62	72	72	78	84	85	88	101	105	97	113	114	112	130	118	122	141	137	120	154	151	152	166	160	158	178	181	174	191	187	187	217	219	212	292	304	301			79	124	112	121.569	118.033	120	130	101.408
80	63	56	62	73	72	79	84	85	88	101	105	97	113	114	112	130	119	122	142	138	120	154	152	152	166	162	158	178	183	174	191	188	188	218	220	213	293	305	302			80	126	112	121.569	119.672	120	131.667	101.408
81	63	56	62	73	73	79	84	85	89	101	105	97	114	114	112	130	120	122	142	139	120	154	153	152	166	163	158	178	184	174	192	188	188	219	220	213	294	306	302			81	126	112	121.569	119.672	121.667	131.667	102.817
82	63	56	62	73	73	79	84	85	89	101	105	97	114	114	112	130	120	122	142	139	120	154	153	152	166	163	158	178	184	174	192	188	188	219	220	213	294	306	302			82	126	112	121.569	119.672	121.667	131.667	102.817
83	63	56	62	73	73	79	84	85	89	101	105	98	114	115	112	130	120	122	142	139	120	154	154	152	166	164	158	178	184	174	192	188	189	219	220	213	294	307	302			83	126	112	121.569	119.672	121.667	131.667	102.817
84	63	56	62	73	73	79	84	85	89	101	105	98	114	115	113	130	120	123	142	140	120	155	154	152	166	164	159	178	184	175	192	188	190	219	220	213	294	308	302			84	126	112	121.569	119.672	121.667	131.667	102.817
85	63	56	62	73	73	79	84	85	89	101	105	98	114	115	114	130	121	123	142	141	120	155	154	152	166	165	159	179	184	175	193	188	190	219	220	213	294	308	303			85	126	112	121.569	119.672	121.667	131.667	102.817
86	63	56	62	73	73	79	84	85	89	101	105	98	114	115	114	130	121	123	142	141	120	155	154	152	166	165	159	179	184	175	193	188	190	219	220	213	294	308	303			86	126	112	121.569	119.672	121.667	131.667	102.817
87	63	56	63	73	74	79	84	86	89	102	105	98	114	116	114	131	122	123	143	141	121	156	154	153	168	165	159	179	184	177	193	189	190	220	221	214	295	308	305			87	126	112	123.529	119.672	123.333	131.667	104.225
88	64	56	63	74	74	80	85	86	89	102	105	99	115	116	115	133	122	123	144	141	121	157	154	154	169	165	159	181	184	177	193	190	190	221	222	215	297	310	305			88	128	112	123.529	121.311	123.333	133.333	104.225
89	64	56	63	74	74	80	85	86	89	102	105	99	115	116	115	133	122	123	144	141	121	157	154	154	169	165	159	181	184	177	193	190	190	221	222	215	297	310	305			89	128	112	123.529	121.311	123.333	133.333	104.225
90	64	56	63	74	74	80	85	86	89	102	105	99	115	116	115	133	122	123	144	141	121	157	154	154	169	165	159	181	184	177	193	190	190	221	222	215	297	310	305			90	128	112	123.529	121.311	123.333	133.333	104.225
91	64	56	63	74	74	80	86	86	89	103	106	99	115	116	116	134	122	123	144	142	122	158	154	155	170	165	159	182	184	178	193	190	192	222	222	216	298	312	305			91	128	112	123.529	121.311	123.333	133.333	104.225
92	64	56	63	73	74	80	86	86	89	103	106	99	115	116	116	134	122	123	144	141	122	158	154	155	169	165	159	182	183	178	193	189	192	221	222	216	297	312	304			92	128	112	123.529	119.672	123.333	133.333	104.225
93	64	56	62	73	74	80	86	86	89	103	106	99	115	115	116	134	122	123	144	141	122	158	154	154	169	164	159	182	182	178	192	189	192	221	221	215	296	311	304			93	128	112	121.569	119.672	123.333	133.333	104.225
94	64	57	62	73	74	80	86	86	90	103	107	99	115	115	117	134	122	123	144	142	122	158	155	154	169	164	160	182	182	179	192	190	192	221	222	216	297	311	305			94	128	114	121.569	119.672	123.333	133.333	104.225
95	65	57	62	73	74	80	87	86	90	104	108	99	115	115	118	134	124	123	144	142	123	158	155	154	169	165	161	182	182	181	193	191	192	221	223	217	298	312	306			95	130	114	121.569	119.672	123.333	133.333	104.225
96	66	57	62	75	74	80	87	86	91	104	109	100	115	116	119	136	124	123	144	143	124	159	156	154	170	166	161	182	182	182	194	191	193	223	223	218	300	312	308			96	132	114	121.569	122.951	123.333	133.333	104.225
97	66	58	62	75	75	80	87	87	93	105	111	100	116	117	119	136	124	125	144	144	124	161	157	155	170	167	162	183	183	182	195	193	193	225	224	220	303	313	310			97	132	116	121.569	122.951	125	133.333	105.634
98	66	59	62	75	75	81	89	87	93	106	111	100	116	117	120	136	125	126	144	145	125	162	157	155	170	167	163	184	183	183	195	194	194	226	225	221	304	314	311			98	132	118	121.569	122.951	125	135	105.634
99	67	60	62	75	75	82	89	87	94	106	113	100	117	117	121	136	125	128	145	146	126	164	157	156	170	169	164	185	183	184	196	195	195	227	226	223	306	316	312			99	134	120	121.569	122.951	125	136.667	105.634
100	67	60	62	75	75	82	89	87	94	106	113	100	117	117	121	136	125	128	145	146	126	164	157	156	170	169	164	185	183	184	196	195	195	227	226	223	306	316	312			100	134	120	121.569	122.951	125	136.667	105.634
101	67	60	62	75	75	82	90	87	94	106	113	100	117	117	121	137	125	128	146	146	126	164	157	156	170	169	164	185	184	184	197	195	195	227	227	223	306	317	312			101	134	120	121.569	122.951	125	136.667	105.634
102	67	60	62	75	75	82	90	87	94	106	113	101	117	117	121	138	125	128	146	147	126	164	157	156	170	170	164	185	184	184	197	196	195	227	227	223	306	318	312			102	134	120	121.569	122.951	125	136.667	105.634
103	67	61	62	75	76	82	90	87	94	106	113	102	117	118	121	139	125	129	146	147	126	164	157	156	172	170	164	185	184	185	198	196	196	228	228	224	307	318	314			103	134	122	121.569	122.951	126.667	136.667	107.042
104	68	61	62	76	76	83	90	87	95	106	113	104	118	118	122	139	127	130	146	148	128	165	157	158	173	170	165	186	186	185	199	197	197	230	229	225	309	320	315			104	136	122	121.569	124.59	126.667	138.333	107.042
105	68	61	62	77	76	83	90	87	95	106	113	104	118	119	122	139	127	130	146	149	128	166	157	158	173	170	165	186	186	186	199	197	198	231	229	225	310	320	316			105	136	122	121.569	126.23	126.667	138.333	107.042
106	69	61	62	77	78	83	90	88	95	106	113	104	119	119	123	139	128	131	147	149	128	166	157	158	173	170	167	186	187	186	200	198	198	233	229	226	312	321	317			106	138	122	121.569	126.23	130	138.333	109.859
107	69	61	63	78	79	83	91	88	95	107	113	104	119	119	123	139	128	132	148	149	128	167	158	158	174	170	168	188	187	186	201	199	198	235	229	227	314	321	319			107	138	122	123.529	127.869	131.667	138.333	111.268
108	69	61	63	79	79	83	92	88	96	108	113	104	120	119	124	139	129	132	149	149	129	167	159	158	176	170	168	189	188	186	201	199	199	236	230	227	315	321	321			108	138	122	123.529	129.508	131.667	138.333	111.268
109	69	61	63	79	79	83	92	89	96	109	113	104	120	119	124	140	129	132	149	149	129	167	159	159	176	171	168	189	188	187	201	199	200	236	231	227	315	322	321			109	138	122	123.529	129.508	131.667	138.333	111.268
110	69	61	63	79	79	83	92	89	96	109	113	104	120	119	124	140	129	132	149	149	129	167	159	159	176	171	168	189	188	187	201	199	200	236	231	227	315	322	321			110	138	122	123.529	129.508	131.667	138.333	111.268
111	69	61	63	79	79	83	92	89	96	109	113	104	120	119	124	140	129	132	149	149	129	167	159	159	176	171	168	189	188	187	201	199	200	236	231	227	315	322	321			111	138	122	123.529	129.508	131.667	138.333	111.268
112	69	61	64	79	79	83	92	89	97	109	113	104	120	120	124	140	129	132	149	150	129	167	159	159	177	171	168	189	188	187	201	199	201	236	232	228	316	323	321			112	138	122	125.49	129.508	131.667	138.333	111.268
113	70	61	64	79	79	83	92	89	97	109	114	105	121	120	125	141	129	132	149	150	130	169	159	160	178	172	168	189	188	189	201	201	201	236	233	229	317	324	322			113	140	122	125.49	129.508	131.667	138.333	111.268
114	70	61	64	79	79	83	92	89	97	109	114	105	121	120	125	141	129	132	149	150	130	169	159	160	178	172	168	189	188	189	201	201	201	236	233	229	317	324	322			114	140	122	125.49	129.508	131.667	138.333	111.268
115	70	61	64	79	80	83	92	90	97	109	114	105	121	120	125	142	129	133	149	150	131	170	160	160	178	174	168	190	188	190	201	201	202	237	234	229	317	325	323			115	140	122	125.49	129.508	133.333	138.333	112.676
116	70	61	64	80	80	83	92	90	97	110	114	105	121	120	125	142	129	134	149	150	132	170	160	160	178	175	168	190	188	191	201	202	202	238	234	229	318	326	323			116	140	122	125.49	131.148	133.333	138.333	112.676
117	70	63	64	80	81	84	92	90	99	111	116	105	122	120	126	143	129	135	150	150	133	170	162	160	178	175	170	191	188	194	202	203	204	240	235	232	320	328	325			117	140	126	125.49	131.148	135	140	114.085
118	70	64	64	80	81	84	92	91	99	112	116	106	122	120	127	143	129	136	150	151	133	170	163	160	178	176	171	191	188	196	203	204	204	240	236	233	321	329	326			118	140	128	125.49	131.148	135	140	114.085
119	71	65	64	80	81	84	94	92	100	113	117	106	123	120	129	144	129	136	151	151	134	173	164	160	178	177	172	192	188	198	203	208	205	240	240	236	324	330	330			119	142	130	125.49	131.148	135	140	114.085
120	71	65	64	81	81	84	97	92	100	115	117	106	124	120	129	144	129	136	151	154	135	173	164	161	178	179	174	192	189	200	206	209	205	241	242	236	325	331	333			120	142	130	125.49	132.787	135	140	114.085
121	73	65	65	82	81	86	97	94	100	115	119	106	125	120	129	144	130	136	151	156	135	174	164	162	179	179	176	194	190	200	208	209	206	243	243	239	328	332	335			121	146	130	127.451	134.426	135	143.333	114.085
122	73	65	65	83	81	86	97	94	100	115	119	106	125	121	129	144	130	136	151	156	136	174	164	162	180	179	176	194	191	200	208	210	206	244	243	239	329	333	335			122	146	130	127.451	136.066	135	143.333	114.085
123	73	65	66	83	81	86	97	95	100	116	119	106	126	121	130	145	133	136	152	156	137	176	166	163	181	181	176	194	192	200	210	212	206	244	244	240	330	334	338			123	146	130	129.412	136.066	135	143.333	114.085
124	73	66	67	83	82	86	98	95	100	116	119	108	127	123	131	147	133	137	152	158	138	176	168	165	181	183	177	194	193	202	213	212	207	245	245	242	332	336	340			124	146	132	131.373	136.066	136.667	143.333	115.493
125	74	67	67	84	82	86	98	95	102	116	119	109	128	123	131	147	134	137	152	158	138	177	168	166	181	184	178	195	194	202	214	212	208	246	246	244	334	336	342			125	148	134	131.373	137.705	136.667	143.333	115.493
126	74	68	67	86	82	86	99	95	103	117	119	109	130	124	131	148	134	139	153	159	139	179	169	166	182	184	180	196	196	202	215	213	209	248	247	245	336	338	343			126	148	136	131.373	140.984	136.667	143.333	115.493
127	74	69	67	86	83	86	98	95	104	117	119	109	130	124	132	149	134	139	153	159	139	179	170	167	183	183	181	197	197	201	214	214	210	249	247	246	337	340	342			127	148	138	131.373	140.984	138.333	143.333	116.901
128	74	69	67	87	84	86	98	95	104	117	119	110	131	125	132	149	136	139	154	159	139	179	170	167	183	183	181	198	198	201	215	214	211	251	247	246	338	341	343			128	148	138	131.373	142.623	140	143.333	118.31
129	74	70	67	87	86	86	98	95	104	118	121	110	131	126	132	149	138	140	156	159	139	180	170	168	185	184	182	199	200	202	217	214	212	254	248	248	340	344	344			129	148	140	131.373	142.623	143.333	143.333	121.127
130	74	71	68	88	86	87	101	95	104	119	122	110	131	127	133	150	138	142	157	160	140	182	170	169	185	185	183	201	201	203	218	217	212	255	251	250	342	347	345			130	148	142	133.333	144.262	143.333	145	121.127
131	74	72	70	88	86	87	102	96	104	119	123	110	133	127	133	150	139	144	158	160	141	183	170	170	186	185	185	202	203	203	220	218	213	255	254	253	345	350	346			131	148	144	137.255	144.262	143.333	145	121.127
132	74	74	70	89	86	89	102	97	105	120	123	110	134	128	133	151	140	144	159	163	141	184	171	170	187	187	186	203	204	204	222	219	214	258	255	255	347	352	348			132	148	148	137.255	145.902	143.333	148.333	121.127
133	74	74	71	89	86	89	102	98	105	121	123	110	135	130	133	151	141	145	161	163	142	185	172	171	188	189	186	203	205	207	222	222	214	258	256	256	348	353	351			133	148	148	139.216	145.902	143.333	148.333	121.127
134	74	75	71	89	86	89	103	100	105	121	123	110	135	130	133	153	142	145	164	163	142	185	173	171	188	190	187	204	206	208	222	223	215	258	259	257	349	355	352			134	148	150	139.216	145.902	143.333	148.333	121.127
135	75	75	71	89	86	89	103	100	105	122	124	110	136	130	133	153	143	145	164	163	144	185	174	173	189	191	187	205	207	208	223	223	216	258	261	258	350	356	353			135	150	150	139.216	145.902	143.333	148.333	121.127
136	75	75	71	89	86	89	103	100	105	122	124	110	136	130	133	153	143	145	164	163	144	185	174	173	189	191	187	205	207	208	223	223	216	258	261	258	350	356	353			136	150	150	139.216	145.902	143.333	148.333	121.127
137	76	76	71	90	86	89	105	101	105	122	126	110	137	130	133	153	143	146	165	164	144	186	175	173	189	192	188	205	209	209	223	224	218	259	263	260	352	358	354			137	152	152	139.216	147.541	143.333	148.333	121.127
138	76	76	71	90	86	90	105	101	105	122	126	112	137	130	134	154	144	146	165	164	146	186	175	174	189	192	190	206	209	210	224	224	219	260	263	260	352	359	355			138	152	152	139.216	147.541	143.333	150	121.127
139	76	76	71	90	87	90	104	102	105	122	126	113	138	131	134	154	144	146	165	164	146	186	176	175	189	192	192	207	209	210	226	224	218	261	263	260	353	358	357			139	152	152	139.216	147.541	145	150	122.535
140	76	76	71	90	87	91	105	102	106	123	128	113	138	131	134	155	145	147	167	164	146	187	177	176	189	192	193	209	210	211	227	226	219	261	266	260	353	361	358			140	152	152	139.216	147.541	145	151.667	122.535
141	76	76	72	90	87	92	106	102	106	123	130	113	139	131	135	156	146	147	167	165	147	187	180	177	190	192	193	210	210	213	227	227	221	261	269	261	354	361	361			141	152	152	141.176	147.541	145	153.333	122.535
142	76	76	72	90	88	92	106	102	106	123	133	113	139	132	136	157	146	147	168	165	147	188	180	177	192	192	193	210	210	215	228	228	221	263	269	261	355	362	363			142	152	152	141.176	147.541	146.667	153.333	123.944
143	76	76	72	90	88	93	106	103	107	124	133	113	139	132	136	158	146	148	169	166	147	189	180	178	192	193	195	212	210	216	228	229	222	263	271	262	356	363	365			143	152	152	141.176	147.541	146.667	155	123.944
144	76	76	72	90	89	93	106	104	107	125	133	113	139	132	137	158	147	149	169	166	148	190	181	178	193	193	195	213	211	216	230	229	222	264	272	262	357	363	367			144	152	152	141.176	147.541	148.333	155	125.352
145	76	76	72	90	89	94	106	104	107	125	133	113	139	132	137	158	148	149	169	166	148	191	181	178	193	193	195	214	211	216	231	229	222	264	273	262	357	364	367			145	152	152	141.176	147.541	148.333	156.667	125.352
146	76	78	72	90	89	95	107	105	107	126	133	113	139	132	138	159	148	149	171	166	149	191	182	178	194	193	196	214	212	218	231	230	224	265	274	264	359	366	368			146	152	156	141.176	147.541	148.333	158.333	125.352
147	76	78	72	91	90	95	107	105	107	127	133	113	141	132	138	159	148	150	171	166	149	191	183	179	196	193	196	215	212	218	232	230	225	267	274	264	361	367	369			147	152	156	141.176	149.18	150	158.333	126.761
148	76	78	72	92	90	95	107	105	108	127	133	113	141	132	138	159	148	151	171	166	150	191	183	180	196	193	197	215	213	218	232	231	225	268	274	265	362	367	370			148	152	156	141.176	150.82	150	158.333	126.761
149	76	79	72	92	91	95	107	106	108	128	134	114	144	132	138	159	150	152	171	166	150	192	184	182	198	194	197	217	213	219	233	231	226	269	275	266	364	369	371			149	152	158	141.176	150.82	151.667	158.333	128.169
150	77	79	72	92	91	95	108	106	108	128	134	115	144	133	139	160	150	152	171	166	152	194	184	183	198	194	199	218	213	220	233	234	226	269	276	267	365	369	374			150	154	158	141.176	150.82	151.667	158.333	128.169
151	77	79	72	92	92	95	108	106	108	128	134	115	144	133	139	160	150	153	172	166	152	195	184	183	198	194	200	219	213	220	233	234	227	270	276	267	366	369	375			151	154	158	141.176	150.82	153.333	158.333	129.577
152	77	79	73	93	92	95	109	106	108	128	134	117	144	134	140	161	151	154	173	166	153	196	185	184	199	195	200	222	213	220	235	235	228	271	276	268	368	372	376			152	154	158	143.137	152.459	153.333	158.333	129.577
153	78	79	74	93	92	96	109	106	108	128	134	117	144	135	140	161	152	154	173	167	153	196	187	185	200	195	201	223	214	220	235	236	229	272	276	270	370	372	378			153	156	158	145.098	152.459	153.333	160	129.577
154	83	79	75	94	95	96	110	107	108	129	134	119	147	136	140	162	155	156	176	167	155	197	188	187	202	197	202	225	216	221	236	237	234	276	277	276	377	377	380			154	166	158	147.059	154.098	158.333	160	133.803
155	83	80	75	94	96	96	111	107	110	130	136	120	147	138	141	162	156	158	178	169	155	198	189	187	203	200	202	226	216	225	239	239	235	278	280	277	379	380	383			155	166	160	147.059	154.098	160	160	135.211
156	83	80	75	95	96	96	111	107	110	130	136	120	147	138	141	162	157	158	179	169	155	198	189	187	204	200	202	226	216	226	240	239	235	279	280	277	380	380	384			156	166	160	147.059	155.738	160	160	135.211
157	84	80	75	95	96	96	111	109	110	130	135	120	147	139	142	162	158	160	179	169	158	199	190	188	205	200	203	227	217	225	241	240	235	278	282	278	380	381	385			157	168	160	147.059	155.738	160	160	135.211
158	84	80	75	95	96	96	111	108	111	130	134	120	146	140	143	162	158	162	180	170	159	199	190	188	205	200	205	229	217	225	244	239	235	278	282	278	380	383	385			158	168	160	147.059	155.738	160	160	135.211
159	84	81	75	95	96	98	111	111	111	130	136	120	146	142	143	162	160	165	182	173	159	203	191	188	206	201	205	230	217	226	246	241	236	278	285	279	381	384	389			159	168	162	147.059	155.738	160	163.333	135.211
160	84	81	75	95	97	98	113	113	111	131	138	120	146	144	143	162	160	165	182	176	160	204	192	189	207	204	206	232	219	227	247	243	238	279	288	279	382	386	392			160	168	162	147.059	155.738	161.667	163.333	136.62
161	85	81	76	95	98	98	114	113	111	131	139	120	146	145	143	163	160	165	182	177	160	204	192	190	207	204	208	233	219	228	248	244	238	280	288	281	384	387	393			161	170	162	149.02	155.738	163.333	163.333	138.028
162	85	81	76	95	98	98	114	113	111	131	139	120	146	145	143	163	160	165	182	177	160	204	192	190	207	204	208	233	219	228	248	244	238	280	288	281	384	387	393			162	170	162	149.02	155.738	163.333	163.333	138.028
163	85	81	76	96	98	98	114	113	111	131	139	121	147	145	143	163	160	165	181	177	160	206	192	191	207	204	209	234	220	227	248	244	239	281	287	281	385	388	393			163	170	162	149.02	157.377	163.333	163.333	138.028
164	85	81	76	96	98	98	114	113	111	131	139	121	147	145	143	163	160	165	181	177	160	206	192	191	207	204	209	234	220	227	248	244	239	281	287	281	385	388	393			164	170	162	149.02	157.377	163.333	163.333	138.028
165	85	81	78	96	99	100	114	115	111	132	139	121	147	145	143	163	160	166	181	179	160	207	193	192	208	204	211	235	221	228	249	244	241	283	288	283	387	389	395			165	170	162	152.941	157.377	165	166.667	139.437
166	85	83	79	97	99	102	114	117	113	133	140	122	148	146	144	163	160	167	184	179	161	208	194	192	209	207	212	236	223	229	251	246	242	286	289	286	390	392	397			166	170	166	154.902	159.016	165	170	139.437
167	85	83	80	97	100	102	114	118	113	133	140	123	148	146	145	163	160	168	184	179	161	209	194	193	209	207	213	236	223	229	252	246	242	287	289	287	391	393	397			167	170	166	156.863	159.016	166.667	170	140.845
168	85	83	80	97	101	102	114	118	114	133	141	123	149	146	146	164	161	168	185	180	161	209	194	193	210	207	214	236	225	229	253	246	243	288	290	287	392	395	397			168	170	166	156.863	159.016	168.333	170	142.254
169	87	84	81	98	101	102	114	118	114	133	141	126	150	148	147	164	163	168	189	180	162	212	196	193	213	208	215	237	226	231	254	247	246	289	290	291	396	398	399			169	174	168	158.824	160.656	168.333	170	142.254
170	87	84	81	98	102	105	114	118	115	134	142	127	152	148	147	164	165	168	189	181	164	213	197	196	213	209	217	237	228	233	255	247	249	292	291	291	397	400	401			170	174	168	158.824	160.656	170	175	143.662
171	87	84	82	98	102	106	114	118	115	134	142	128	152	148	148	165	166	168	189	183	164	213	198	196	213	209	218	239	228	233	256	248	249	293	291	292	398	400	403			171	174	168	160.784	160.656	170	176.667	143.662
172	87	84	82	98	103	106	115	119	115	135	142	128	152	149	148	166	168	168	189	185	164	213	198	196	214	209	218	239	230	234	257	248	251	294	292	292	399	402	404			172	174	168	160.784	160.656	171.667	176.667	145.07
173	87	85	82	98	103	106	115	119	116	136	142	128	152	149	148	166	168	169	189	185	165	213	198	196	215	209	218	239	231	235	258	248	252	294	293	293	400	403	405			173	174	170	160.784	160.656	171.667	176.667	145.07
174	87	85	82	98	103	106	115	119	116	136	142	128	152	149	148	166	168	169	189	185	165	213	198	196	215	209	218	239	231	235	258	248	252	294	293	293	400	403	405			174	174	170	160.784	160.656	171.667	176.667	145.07
175	87	86	82	100	105	106	115	121	116	136	142	129	152	150	150	168	169	170	190	185	165	214	199	199	216	210	221	240	234	236	260	250	252	298	294	294	404	408	405			175	174	172	160.784	163.934	175	176.667	147.887
176	89	86	82	100	107	106	115	121	117	136	143	129	153	150	152	168	170	170	192	186	166	215	199	199	218	211	221	241	235	237	263	250	252	300	295	296	407	410	407			176	178	172	160.784	163.934	178.333	176.667	150.704
177	90	86	83	101	108	106	115	122	118	137	143	130	154	150	153	170	170	171	193	187	167	215	201	199	219	213	221	241	236	238	263	252	253	303	295	298	410	411	409			177	180	172	162.745	165.574	180	176.667	152.113
178	90	86	83	101	108	106	115	122	118	137	144	131	155	150	154	173	171	172	194	187	168	215	203	201	220	215	222	243	238	239	264	254	255	303	296	298	410	414	411			178	180	172	162.745	165.574	180	176.667	152.113
179	90	86	83	101	109	106	116	122	118	138	144	131	155	150	154	173	172	172	194	187	168	215	203	202	220	215	223	244	238	239	264	254	256	304	296	298	410	415	411			179	180	172	162.745	165.574	181.667	176.667	153.521
180	90	86	83	101	110	106	116	122	118	139	144	131	155	150	154	173	173	172	194	187	168	216	203	203	220	216	223	244	238	239	264	254	256	305	296	298	410	415	412			180	180	172	162.745	165.574	183.333	176.667	154.93
181	91	87	83	102	110	106	117	122	119	140	144	132	156	152	154	173	173	173	196	187	168	218	203	204	222	216	225	246	239	241	265	255	259	306	298	300	412	418	414			181	182	174	162.745	167.213	183.333	176.667	154.93
182	91	88	84	102	110	108	118	122	121	141	145	133	156	152	155	174	174	173	199	187	168	218	204	205	223	217	226	246	241	241	266	257	260	308	300	302	414	419	417			182	182	176	164.706	167.213	183.333	180	154.93
183	91	88	84	102	110	108	118	122	121	141	145	133	156	154	155	174	174	174	199	187	170	220	204	206	224	218	226	246	242	242	266	258	261	308	300	302	414	420	418			183	182	176	164.706	167.213	183.333	180	154.93
184	91	88	84	102	110	108	118	122	123	141	147	133	156	155	156	175	174	175	200	189	170	220	206	206	226	218	226	247	243	243	266	259	262	308	302	302	414	422	419			184	182	176	164.706	167.213	183.333	180	154.93
185	91	88	85	102	110	109	118	124	123	142	147	134	156	156	156	175	174	177	200	192	170	221	208	207	230	218	226	248	244	245	267	262	262	309	303	304	416	425	420			185	182	176	166.667	167.213	183.333	181.667	154.93
186	91	88	85	102	111	110	118	125	126	144	147	135	157	156	158	176	174	177	201	193	170	222	208	208	231	219	228	251	245	246	267	263	266	312	305	306	418	427	423			186	182	176	166.667	167.213	185	183.333	156.338
187	92	88	85	102	112	111	118	126	126	144	148	135	157	157	159	176	175	178	201	194	170	222	210	209	231	220	228	252	245	248	267	265	266	313	307	307	419	428	425			187	184	176	166.667	167.213	186.667	185	157.746
188	92	88	86	102	112	112	118	127	126	145	150	136	157	157	159	177	175	178	202	194	171	224	211	212	233	220	230	256	245	248	268	267	266	313	309	308	420	430	427			188	184	176	168.627	167.213	186.667	186.667	157.746
189	92	88	86	102	112	112	118	127	126	146	150	136	157	157	159	177	175	178	202	194	172	224	211	213	233	220	231	256	246	248	268	267	267	313	310	308	420	430	428			189	184	176	168.627	167.213	186.667	186.667	157.746
190	92	88	87	103	112	112	118	129	127	148	151	136	158	157	159	179	175	179	203	194	173	226	212	215	234	223	232	256	248	251	272	267	268	314	314	310	423	435	428			190	184	176	170.588	168.852	186.667	186.667	157.746
191	92	88	87	103	112	112	118	129	127	148	151	136	158	157	159	179	175	179	203	194	173	226	212	215	234	223	232	256	248	251	272	267	268	314	314	310	423	435	428			191	184	176	170.588	168.852	186.667	186.667	157.746
192	92	88	88	103	112	113	118	130	127	148	152	136	159	157	159	179	175	179	203	194	173	226	213	215	235	223	232	256	249	251	272	268	268	315	314	311	424	435	429			192	184	176	172.549	168.852	186.667	188.333	157.746
193	93	88	88	104	112	114	120	130	128	150	152	138	160	158	159	182	177	180	205	196	173	226	217	218	237	225	233	257	251	253	275	270	270	316	317	312	425	438	433			193	186	176	172.549	170.492	186.667	190	157.746
194	93	89	88	104	112	114	120	131	128	151	152	138	161	158	159	183	177	181	205	197	174	226	219	219	237	225	234	258	251	254	275	272	270	316	318	313	426	439	434			194	186	178	172.549	170.492	186.667	190	157.746
195	93	89	88	104	112	114	120	131	128	151	153	138	161	159	159	183	177	181	205	198	174	226	219	219	237	225	234	259	251	254	275	272	271	316	319	313	426	440	434			195	186	178	172.549	170.492	186.667	190	157.746
196	94	89	88	104	112	116	120	132	128	152	153	138	161	159	159	183	177	183	206	199	174	226	220	220	238	226	234	260	252	255	276	273	271	316	321	314	427	442	435			196	188	178	172.549	170.492	186.667	193.333	157.746
197	95	90	88	104	114	117	122	133	129	153	155	138	161	161	164	187	178	183	209	201	174	227	222	221	240	228	235	262	256	255	279	274	273	318	324	316	430	444	441			197	190	180	172.549	170.492	190	195	160.563
198	95	90	88	104	114	117	122	133	129	153	155	138	161	161	164	187	178	183	209	201	174	227	222	221	240	228	235	262	256	255	279	274	273	318	324	316	430	444	441			198	190	180	172.549	170.492	190	195	160.563
199	95	90	88	104	114	117	122	133	129	153	155	138	161	162	164	187	178	183	209	202	174	227	223	221	241	228	235	262	257	255	280	274	273	318	324	316	430	444	442			199	190	180	172.549	170.492	190	195	160.563
200	95	90	88	104	114	117	124	133	130	154	157	139	161	164	167	187	179	184	209	204	175	229	226	222	243	230	236	263	259	255	280	275	276	319	327	317	432	448	443			200	190	180	172.549	170.492	190	195	160.563
201	97	90	88	105	114	118	124	133	130	154	157	140	161	164	168	187	180	184	210	204	175	231	226	223	244	231	237	263	259	257	281	276	277	321	327	319	434	450	444			201	194	180	172.549	172.131	190	196.667	160.563
202	97	91	88	105	116	118	125	134	130	154	158	141	161	165	169	188	180	184	210	204	175	232	226	224	245	231	237	263	261	257	282	277	277	323	327	320	436	450	446			202	194	182	172.549	172.131	193.333	196.667	163.38
203	97	91	88	106	116	118	125	134	131	154	158	141	161	167	169	188	180	185	211	205	175	232	226	224	246	231	237	265	261	257	282	278	278	324	328	321	438	452	446			203	194	182	172.549	173.77	193.333	196.667	163.38
204	97	92	88	106	116	119	125	136	131	155	159	141	161	167	170	190	180	186	212	206	175	232	228	225	248	232	237	267	262	258	283	279	280	325	329	322	439	453	449			204	194	184	172.549	173.77	193.333	198.333	163.38
205	98	92	88	107	116	119	125	137	131	155	160	142	161	168	171	191	181	186	213	206	175	232	230	225	248	233	239	267	263	259	284	279	282	326	330	323	441	455	450			205	196	184	172.549	175.41	193.333	198.333	163.38
206	99	92	89	109	116	119	125	137	133	155	160	143	161	169	172	193	182	186	213	207	176	233	231	227	250	233	239	268	264	259	285	280	283	328	331	325	444	457	451			206	198	184	174.51	178.689	193.333	198.333	163.38
207	99	92	89	109	116	119	125	137	134	155	162	143	161	170	172	193	183	187	214	208	176	233	232	227	251	233	239	269	265	259	285	281	284	328	332	326	445	458	452			207	198	184	174.51	178.689	193.333	198.333	163.38
208	99	92	89	109	116	120	125	138	134	155	162	143	162	170	172	194	183	187	214	209	176	233	232	227	251	234	239	269	265	260	285	281	285	328	333	326	445	458	453			208	198	184	174.51	178.689	193.333	200	163.38
209	99	93	89	109	116	121	127	139	134	156	162	144	163	171	173	196	184	188	218	209	176	236	233	228	253	235	240	270	266	263	285	282	289	329	336	328	447	461	455			209	198	186	174.51	178.689	193.333	201.667	163.38
210	99	93	89	109	116	121	127	140	134	156	162	144	164	171	173	197	184	188	218	210	176	236	233	229	253	237	240	271	267	263	287	282	289	329	337	329	448	463	455			210	198	186	174.51	178.689	193.333	201.667	163.38
211	100	93	89	110	116	121	127	140	134	156	162	144	164	171	173	197	184	188	218	210	176	236	233	230	253	238	240	271	267	264	287	282	290	330	337	330	449	464	455			211	200	186	174.51	180.328	193.333	201.667	163.38
212	100	93	89	110	116	121	127	140	134	156	162	144	164	171	173	197	184	188	218	210	176	236	233	230	253	238	240	271	267	264	287	282	290	330	337	330	449	464	455			212	200	186	174.51	180.328	193.333	201.667	163.38
213	100	93	89	111	117	121	127	140	136	157	162	145	165	172	173	197	184	189	218	212	176	236	233	230	255	238	240	274	267	264	287	284	291	332	338	331	451	465	457			213	200	186	174.51	181.967	195	201.667	164.789
214	101	93	89	112	117	121	127	140	136	157	163	146	165	173	173	198	185	189	219	213	176	236	234	230	255	239	241	274	269	264	288	284	292	333	339	332	453	465	459			214	202	186	174.51	183.607	195	201.667	164.789
215	101	94	91	112	118	123	129	140	136	158	164	146	165	173	174	198	186	192	220	213	176	237	235	231	256	242	241	275	271	264	288	286	294	335	341	335	456	465	463			215	202	188	178.431	183.607	196.667	205	166.197
216	101	94	91	112	118	124	129	140	136	159	164	146	165	174	174	198	187	192	221	213	176	238	235	231	256	243	242	275	271	266	289	287	294	336	341	335	456	466	464			216	202	188	178.431	183.607	196.667	206.667	166.197
217	101	94	91	112	119	124	129	141	137	159	166	146	166	174	174	198	187	194	222	214	177	238	235	231	257	244	243	276	272	268	290	288	295	337	342	335	456	469	465			217	202	188	178.431	183.607	198.333	206.667	167.606
218	101	94	91	112	119	125	129	141	137	159	166	146	166	174	175	198	187	194	223	214	177	238	235	231	258	244	243	276	273	268	290	288	296	338	342	336	457	470	465			218	202	188	178.431	183.607	198.333	208.333	167.606
219	101	94	92	113	120	125	130	141	137	159	166	146	167	174	176	198	187	195	223	216	177	238	235	231	258	244	243	276	273	270	290	290	296	340	342	337	459	470	467			219	202	188	180.392	185.246	200	208.333	169.014
220	101	95	92	113	120	125	131	141	137	159	167	147	168	174	179	200	188	195	223	217	178	241	236	233	258	244	247	277	274	273	291	293	297	341	344	338	461	472	470			220	202	190	180.392	185.246	200	208.333	169.014
221	102	95	92	114	120	125	131	142	137	159	168	148	168	175	181	201	188	197	224	218	180	242	236	233	258	245	249	279	274	275	293	295	297	343	345	339	464	475	471			221	204	190	180.392	186.885	200	208.333	169.014
222	102	95	94	114	121	125	131	142	139	159	168	149	169	175	181	201	189	199	226	218	181	242	237	233	258	247	250	279	274	277	293	297	298	344	347	341	466	478	471			222	204	190	184.314	186.885	201.667	208.333	170.423
223	103	95	95	114	121	126	131	142	139	160	169	149	170	175	181	202	189	199	228	218	181	243	237	234	259	248	251	281	275	277	294	297	299	345	347	343	468	478	474			223	206	190	186.275	186.885	201.667	210	170.423
224	103	95	95	114	121	126	132	142	139	161	169	149	170	175	182	202	189	199	229	218	182	244	238	235	259	251	251	282	277	277	295	297	300	345	349	343	468	480	475			224	206	190	186.275	186.885	201.667	210	170.423
225	104	95	95	115	121	127	133	142	139	161	169	150	171	175	182	202	190	200	230	219	184	246	238	236	259	253	253	283	278	279	297	297	302	347	349	344	470	481	478			225	208	190	186.275	188.525	201.667	211.667	170.423
226	105	94	95	115	120	128	133	142	139	161	168	151	171	175	182	203	190	200	230	220	183	245	239	236	259	254	254	282	278	281	297	299	302	347	349	344	470	481	480			226	210	188	186.275	188.525	200	213.333	169.014
227	105	94	95	117	120	128	134	143	139	161	168	152	172	176	182	204	191	201	231	220	184	248	239	237	262	254	254	283	278	282	298	299	303	349	350	344	472	483	481			227	210	188	186.275	191.803	200	213.333	169.014
228	106	94	97	119	120	128	136	143	139	161	169	152	172	177	182	205	191	201	231	221	184	249	239	238	263	255	254	283	280	284	300	301	303	351	350	347	475	486	482			228	212	188	190.196	195.082	200	213.333	169.014
229	106	94	97	119	120	128	136	143	139	161	169	153	172	177	182	205	191	201	231	221	184	250	239	238	263	256	254	284	280	284	300	302	303	352	350	347	476	487	482			229	212	188	190.196	195.082	200	213.333	169.014
230	106	94	98	119	120	128	137	144	140	162	169	155	172	178	183	206	191	202	231	221	187	251	240	239	264	257	254	286	281	284	302	303	303	352	353	348	477	489	483			230	212	188	192.157	195.082	200	213.333	169.014
231	106	94	98	120	120	128	138	144	140	162	170	157	173	179	183	208	191	202	231	224	187	252	241	239	265	258	254	288	282	284	303	303	304	354	353	349	479	490	485			231	212	188	192.157	196.721	200	213.333	169.014
232	106	94	98	121	121	129	139	144	142	162	170	158	175	181	183	208	194	204	233	225	188	252	244	239	266	259	256	289	285	285	304	304	306	358	354	350	482	492	488			232	212	188	192.157	198.361	201.667	215	170.423
233	106	95	98	121	121	130	140	144	143	162	170	158	175	181	183	209	194	205	234	226	188	254	244	239	267	259	257	290	285	286	305	304	307	359	355	351	483	493	489			233	212	190	192.157	198.361	201.667	216.667	170.423
234	106	95	99	121	123	130	140	144	144	162	170	159	175	182	185	209	195	206	234	227	190	254	245	240	267	261	257	292	285	287	305	306	308	361	356	353	485	495	490			234	212	190	194.118	198.361	205	216.667	173.239
235	106	95	99	121	123	130	140	145	145	163	170	159	177	182	185	209	196	207	235	228	191	255	247	240	269	262	257	292	286	289	305	306	310	362	358	354	486	495	493			235	212	190	194.118	198.361	205	216.667	173.239
236	106	95	99	121	124	130	140	145	145	164	170	159	177	182	186	209	196	209	235	229	191	255	247	241	269	262	258	293	286	290	306	306	311	363	358	354	487	497	493			236	212	190	194.118	198.361	206.667	216.667	174.648
237	106	95	99	121	125	130	140	145	146	165	171	159	177	183	187	209	197	210	235	231	191	256	247	241	269	263	259	294	287	290	308	306	311	364	358	354	488	497	495			237	212	190	194.118	198.361	208.333	216.667	176.056
238	106	95	99	121	125	131	140	145	147	165	171	159	177	183	187	210	197	210	235	232	191	257	247	241	269	263	260	295	287	290	309	306	311	365	358	354	488	498	495			238	212	190	194.118	198.361	208.333	218.333	176.056
239	107	95	100	121	125	132	141	145	148	165	171	160	178	183	189	211	198	211	235	232	192	257	247	244	269	263	262	297	288	290	310	307	311	365	361	356	490	500	496			239	214	190	196.078	198.361	208.333	220	176.056
240	108	95	101	121	126	132	142	145	149	165	172	160	179	183	189	211	200	212	235	233	192	257	248	244	270	264	263	297	289	291	311	309	311	367	362	358	493	501	498			240	216	190	198.039	198.361	210	220	177.465
241	109	95	101	121	126	132	143	145	149	165	173	161	180	184	189	212	201	213	235	233	194	258	248	246	272	265	263	297	289	294	311	309	313	368	362	360	495	502	500			241	218	190	198.039	198.361	210	220	177.465
242	110	95	102	122	126	132	145	146	149	166	174	161	181	185	189	212	202	215	237	234	194	259	249	246	274	265	264	299	290	296	312	310	315	369	365	363	499	504	503			242	220	190	200	200	210	220	177.465
243	110	96	102	122	127	132	145	146	149	166	175	161	181	185	190	212	202	215	237	235	194	259	249	246	274	265	265	299	291	296	313	310	315	370	365	364	500	505	503			243	220	192	200	200	211.667	220	178.873
244	110	97	102	122	127	132	145	146	150	166	176	161	181	185	191	212	202	215	238	235	194	261	249	247	274	265	266	300	291	297	313	311	316	370	366	365	501	506	504			244	220	194	200	200	211.667	220	178.873
245	110	97	102	122	127	132	145	146	150	167	177	161	182	185	192	212	202	216	239	236	194	264	249	248	274	266	268	301	291	298	313	313	317	370	366	365	501	509	504			245	220	194	200	200	211.667	220	178.873
246	110	97	102	122	127	132	145	148	150	168	177	161	184	185	192	212	202	217	240	236	194	266	250	249	274	268	268	301	293	299	313	315	318	370	369	365	501	511	505			246	220	194	200	200	211.667	220	178.873
247	110	97	102	122	129	133	145	148	150	169	178	161	185	187	192	214	202	217	240	236	195	266	252	251	276	268	268	302	293	301	315	315	319	372	370	365	501	513	506			247	220	194	200	200	215	221.667	181.69
248	110	97	103	122	129	133	145	148	151	169	178	162	185	187	192	214	202	217	240	236	195	266	253	251	276	269	268	302	293	301	316	315	319	372	371	366	502	514	506			248	220	194	201.961	200	215	221.667	181.69
249	110	97	104	123	130	133	145	148	152	170	178	162	185	188	192	216	202	217	241	236	196	266	253	252	277	269	269	302	294	302	316	317	319	374	371	367	504	514	508			249	220	194	203.922	201.639	216.667	221.667	183.099
250	112	98	104	124	130	134	146	148	153	170	181	164	186	190	194	218	205	218	241	237	199	268	254	256	278	272	271	303	295	305	318	318	322	375	374	370	508	519	510			250	224	196	203.922	203.279	216.667	223.333	183.099
251	112	100	104	124	130	134	147	149	153	170	183	166	186	192	195	220	205	220	241	238	200	269	255	257	281	273	271	304	297	306	320	318	324	375	377	372	510	520	514			251	224	200	203.922	203.279	216.667	223.333	183.099
252	114	100	104	124	130	135	147	149	154	170	185	167	186	193	199	223	206	220	241	239	202	271	256	258	283	273	272	306	299	307	321	319	326	376	378	374	512	521	518			252	228	200	203.922	203.279	216.667	225	183.099
253	114	100	104	124	131	135	147	149	154	170	185	167	186	193	200	223	207	220	241	240	202	271	257	258	283	273	272	307	299	307	321	319	326	377	378	374	513	522	518			253	228	200	203.922	203.279	218.333	225	184.507
254	114	100	104	124	131	136	147	149	154	171	185	167	187	193	200	223	207	221	241	240	203	271	258	259	283	273	272	308	299	307	322	319	326	378	378	374	513	523	518			254	228	200	203.922	203.279	218.333	226.667	184.507
255	114	100	104	124	131	136	147	150	155	172	185	167	187	194	201	223	208	221	241	241	204	272	261	260	283	274	274	310	301	307	323	319	328	378	380	375	514	526	519			255	228	200	203.922	203.279	218.333	226.667	184.507
256	114	100	106	125	131	137	148	151	156	174	186	167	187	195	201	223	208	222	242	242	205	274	261	260	284	275	275	313	301	307	324	321	328	379	382	377	517	527	521			256	228	200	207.843	204.918	218.333	228.333	184.507
257	116	100	106	127	131	137	150	152	157	175	189	168	187	196	202	224	208	224	244	244	206	278	262	260	287	275	276	316	302	307	325	323	330	382	384	380	521	528	525			257	232	200	207.843	208.197	218.333	228.333	184.507
258	117	101	106	128	131	138	150	152	158	176	190	169	188	199	205	226	209	226	245	247	208	280	263	261	289	277	277	318	304	309	328	324	332	384	384	382	523	531	529			258	234	202	207.843	209.836	218.333	230	184.507
259	118	101	106	129	131	138	150	152	158	176	191	169	188	200	205	228	209	226	245	247	210	281	263	262	291	277	277	318	304	310	328	324	334	385	384	383	524	531	531			259	236	202	207.843	211.475	218.333	230	184.507
260	118	101	107	129	131	139	150	154	158	176	192	169	189	200	205	228	209	227	245	248	210	282	263	263	291	277	278	319	305	310	329	325	334	385	386	384	525	531	533			260	236	202	209.804	211.475	218.333	231.667	184.507
261	118	101	107	129	131	141	150	154	159	176	194	169	190	201	206	230	210	228	246	249	211	282	264	264	291	280	278	320	305	312	331	326	335	386	388	384	525	532	536			261	236	202	209.804	211.475	218.333	235	184.507
262	118	101	107	129	132	141	150	154	159	177	194	169	190	202	207	231	210	228	246	250	211	282	265	264	293	280	278	320	305	314	332	326	336	387	388	384	525	533	537			262	236	202	209.804	211.475	220	235	185.915
263	118	101	107	129	132	141	150	154	159	178	194	169	190	202	208	231	210	229	246	251	211	282	265	264	293	281	278	320	305	315	333	326	336	387	388	384	525	533	538			263	236	202	209.804	211.475	220	235	185.915
264	118	102	107	129	132	141	151	154	160	179	194	169	190	202	209	232	210	229	247	251	211	283	266	266	294	281	279	321	306	316	333	327	338	387	390	385	526	535	539			264	236	204	209.804	211.475	220	235	185.915
265	118	102	107	129	132	141	151	154	160	179	194	169	190	202	209	232	210	229	247	251	211	283	266	266	294	281	279	321	306	316	333	327	338	387	390	385	526	535	539			265	236	204	209.804	211.475	220	235	185.915
266	118	102	108	129	133	141	151	154	160	180	195	169	190	204	209	234	210	229	248	251	212	284	266	268	295	281	280	322	306	318	333	329	339	388	391	386	527	536	541			266	236	204	211.765	211.475	221.667	235	187.324
267	120	102	108	129	134	142	151	154	161	183	197	169	191	205	211	234	212	231	249	251	214	285	268	270	296	282	282	323	307	321	333	333	340	390	393	388	530	539	543			267	240	204	211.765	211.475	223.333	236.667	188.732
268	120	102	108	129	134	142	151	154	161	183	197	169	191	205	211	234	212	231	249	251	214	285	268	270	296	282	282	323	307	321	333	333	340	390	393	388	530	539	543			268	240	204	211.765	211.475	223.333	236.667	188.732
269	121	102	108	130	134	142	152	154	161	184	197	169	191	205	212	234	214	231	250	251	215	285	268	271	297	282	283	325	307	321	334	333	340	391	393	389	532	539	545			269	242	204	211.765	213.115	223.333	236.667	188.732
270	121	102	109	130	134	143	152	154	163	184	198	169	191	205	214	234	215	232	250	253	215	286	268	271	297	283	284	326	307	322	334	334	341	391	395	390	533	540	546			270	242	204	213.725	213.115	223.333	238.333	188.732
271	121	102	109	130	134	144	152	154	163	185	198	169	191	205	216	236	215	232	251	254	216	287	269	272	300	283	284	327	307	324	334	336	342	391	397	390	533	541	548			271	242	204	213.725	213.115	223.333	240	188.732
272	121	102	109	130	134	144	152	154	163	185	198	169	191	205	216	236	215	232	251	254	216	287	269	272	300	283	284	327	307	324	334	336	342	391	397	390	533	541	548			272	242	204	213.725	213.115	223.333	240	188.732
273	121	102	109	132	134	144	153	154	163	186	198	169	192	205	218	236	216	232	252	254	216	287	270	274	301	284	284	328	308	325	335	336	343	393	397	390	535	541	551			273	242	204	213.725	216.393	223.333	240	188.732
274	122	104	109	132	136	144	153	155	163	186	199	170	194	205	218	236	217	232	252	254	216	287	271	274	301	284	286	328	309	327	337	337	343	395	398	393	538	543	552			274	244	208	213.725	216.393	226.667	240	191.549
275	122	104	109	133	136	144	153	155	166	187	199	171	195	206	220	237	218	232	253	255	218	287	274	275	302	285	288	330	310	328	339	338	344	396	400	393	539	544	555			275	244	208	213.725	218.033	226.667	240	191.549
276	122	105	109	133	136	144	153	155	166	188	199	171	195	206	220	237	220	232	255	255	219	287	276	275	302	286	289	330	311	329	339	339	346	396	400	394	540	545	557			276	244	210	213.725	218.033	226.667	240	191.549
277	122	105	109	133	136	144	154	155	166	188	199	172	195	207	220	238	220	232	255	255	219	287	276	276	302	286	289	330	311	330	339	339	347	396	401	394	540	546	557			277	244	210	213.725	218.033	226.667	240	191.549
278	122	106	109	133	136	144	155	155	166	188	199	172	195	207	220	238	220	232	256	255	219	287	276	276	303	286	289	330	312	330	339	339	348	396	402	395	541	547	557			278	244	212	213.725	218.033	226.667	240	191.549
279	122	107	108	133	137	144	155	155	167	189	198	172	195	208	221	238	220	232	257	255	220	286	279	276	302	287	291	331	311	332	339	340	349	397	402	395	541	548	558			279	244	214	211.765	218.033	228.333	240	192.958
280	122	107	108	133	137	144	155	155	167	189	199	172	195	209	221	238	220	233	257	255	220	286	280	276	302	288	291	331	312	332	339	340	349	397	403	395	541	549	558			280	244	214	211.765	218.033	228.333	240	192.958
281	122	107	108	133	137	144	156	155	168	190	199	174	195	209	222	239	220	233	258	256	220	287	280	276	303	290	291	332	312	332	339	342	349	397	405	395	541	550	560			281	244	214	211.765	218.033	228.333	240	192.958
282	122	109	108	133	137	144	157	155	169	192	199	174	195	209	223	239	221	234	259	257	220	288	281	276	303	290	292	333	312	333	339	342	351	397	407	397	543	552	560			282	244	218	211.765	218.033	228.333	240	192.958
283	123	109	108	133	137	144	157	155	169	192	200	174	195	209	223	239	221	234	260	257	220	289	281	276	303	291	292	334	312	333	340	342	351	397	407	398	544	552	561			283	246	218	211.765	218.033	228.333	240	192.958
284	123	109	108	133	137	145	157	155	169	192	200	174	195	209	223	240	221	234	260	258	220	289	282	276	304	291	292	335	312	333	340	343	351	397	408	398	544	552	562			284	246	218	211.765	218.033	228.333	241.667	192.958
285	123	111	108	133	137	145	157	156	169	192	201	175	195	210	223	241	221	235	260	258	220	289	283	278	305	291	294	336	313	334	341	344	351	397	410	400	546	554	563			285	246	222	211.765	218.033	228.333	241.667	192.958
286	123	112	108	133	138	146	157	157	170	193	202	176	195	210	224	242	221	236	261	261	220	291	284	278	306	292	296	338	314	335	341	347	352	398	412	401	548	558	563			286	246	224	211.765	218.033	230	243.333	194.366
287	123	112	108	133	138	146	158	157	170	193	202	176	195	210	224	243	222	236	262	261	220	291	285	278	306	292	296	338	315	335	341	347	353	398	413	401	548	559	564			287	246	224	211.765	218.033	230	243.333	194.366
288	124	113	108	134	138	146	158	157	170	194	203	176	194	211	225	242	222	238	262	261	221	291	286	279	305	293	297	337	316	336	342	347	354	399	413	403	550	559	566			288	248	226	211.765	219.672	230	243.333	194.366
289	124	114	108	135	138	146	159	157	171	195	204	177	194	211	225	243	223	239	263	261	221	293	287	281	305	294	299	338	317	337	342	348	356	400	414	404	551	561	567			289	248	228	211.765	221.311	230	243.333	194.366
290	125	114	108	136	138	146	160	157	171	195	205	177	194	211	225	243	224	239	263	262	221	293	287	281	305	295	300	338	318	338	343	349	356	401	415	405	552	562	568			290	250	228	211.765	222.951	230	243.333	194.366
291	125	114	108	136	138	146	160	157	171	195	205	177	194	212	226	243	224	239	264	262	222	294	288	282	305	295	302	339	318	338	344	350	356	401	415	405	552	563	569			291	250	228	211.765	222.951	230	243.333	194.366
292	125	114	108	136	138	147	161	158	171	195	206	177	194	214	226	243	225	240	264	263	222	295	288	282	305	295	302	339	319	338	344	351	357	401	417	405	552	563	571			292	250	228	211.765	222.951	230	245	194.366
293	126	115	108	137	138	147	161	159	171	196	206	177	195	216	226	243	225	241	265	263	223	296	288	282	306	295	303	339	321	338	346	352	357	402	418	407	554	565	572			293	252	230	211.765	224.59	230	245	194.366
294	126	116	108	137	138	147	162	159	171	196	206	177	196	216	226	243	225	241	265	263	223	296	289	282	306	295	303	339	321	339	346	352	358	402	419	408	555	565	573			294	252	232	211.765	224.59	230	245	194.366
295	126	117	108	137	138	147	162	159	171	196	206	177	197	216	226	243	225	242	265	263	224	296	290	283	306	296	303	339	321	339	347	352	358	402	419	409	556	566	573			295	252	234	211.765	224.59	230	245	194.366
296	126	118	108	138	139	149	164	159	172	197	208	177	199	218	227	244	225	244	265	265	226	297	291	285	306	296	308	339	323	343	350	356	358	406	421	410	558	568	578			296	252	236	211.765	226.23	231.667	248.333	195.775
297	126	118	108	138	139	149	164	159	173	197	208	178	199	218	227	244	225	244	266	265	226	297	291	285	307	296	308	340	323	343	350	356	358	406	422	410	558	568	579			297	252	236	211.765	226.23	231.667	248.333	195.775
298	126	118	108	138	139	150	165	159	174	198	209	179	199	221	227	246	225	245	266	265	228	298	293	287	307	297	309	340	324	345	350	358	360	407	424	411	559	572	579			298	252	236	211.765	226.23	231.667	250	195.775
299	126	118	108	138	139	150	166	159	174	199	209	179	200	221	227	246	226	245	266	265	230	298	295	287	307	298	309	340	326	345	351	359	360	407	425	411	559	573	580			299	252	236	211.765	226.23	231.667	250	195.775
300	126	118	108	138	139	151	166	160	174	200	209	179	201	221	227	246	226	247	268	265	232	298	297	288	307	299	310	343	326	346	353	360	361	409	426	412	560	576	581			300	252	236	211.765	226.23	231.667	251.667	195.775
301	127	118	110	138	139	152	166	161	174	201	210	179	201	221	228	246	227	247	268	265	233	298	298	289	308	299	311	343	327	348	353	361	363	410	428	415	563	578	582			301	254	236	215.686	226.23	231.667	253.333	195.775
302	129	119	110	139	141	152	166	162	174	201	210	179	202	221	230	248	229	248	269	266	234	300	298	289	312	299	313	344	330	349	356	363	364	413	429	419	568	581	585			302	258	238	215.686	227.869	235	253.333	198.592
303	130	119	110	140	141	154	166	162	174	201	210	180	204	221	230	249	229	249	269	268	234	301	298	289	314	300	313	344	332	349	358	364	364	415	430	420	570	584	585			303	260	238	215.686	229.508	235	256.667	198.592
304	131	119	110	140	141	155	166	162	174	203	210	181	206	221	232	249	229	250	271	270	234	302	302	289	317	301	313	344	334	352	361	365	364	416	431	421	571	586	588			304	262	238	215.686	229.508	235	258.333	198.592
305	131	119	110	142	141	155	166	162	176	203	211	182	207	221	233	249	230	250	272	270	235	303	303	290	317	302	313	344	336	353	363	365	365	418	431	421	573	589	588			305	262	238	215.686	232.787	235	258.333	198.592
306	132	119	110	142	144	155	166	162	176	203	211	185	207	225	233	252	230	251	272	270	237	303	303	294	318	302	316	345	337	353	363	367	368	421	431	425	577	589	593			306	264	238	215.686	232.787	240	258.333	202.817
307	133	119	110	143	144	155	166	162	176	203	211	186	207	225	233	252	230	251	273	270	237	303	304	294	319	302	316	345	337	354	363	367	369	422	431	426	578	590	593			307	266	238	215.686	234.426	240	258.333	202.817
308	133	119	110	143	144	155	166	162	176	203	211	186	207	225	234	252	231	251	273	271	237	303	304	294	319	303	316	346	337	354	364	367	369	422	431	426	578	590	594			308	266	238	215.686	234.426	240	258.333	202.817
309	133	121	110	143	145	155	166	163	176	203	211	186	207	225	235	253	231	251	274	272	237	303	304	294	320	304	316	346	339	354	364	368	370	423	432	428	580	592	594			309	266	242	215.686	234.426	241.667	258.333	204.225
310	134	121	110	143	145	155	166	163	176	203	212	186	208	225	235	253	232	251	274	272	238	303	304	295	320	305	316	346	340	354	364	368	371	423	433	429	581	593	594			310	268	242	215.686	234.426	241.667	258.333	204.225
311	134	122	110	145	145	157	167	164	178	205	212	187	208	225	237	256	232	253	275	273	239	306	306	297	321	306	318	346	342	358	367	370	372	428	433	431	585	595	598			311	268	244	215.686	237.705	241.667	261.667	204.225
312	134	124	110	146	145	157	168	164	179	207	213	187	207	226	238	256	233	254	278	273	240	307	307	298	323	308	318	350	343	357	370	371	372	429	436	434	588	598	599			312	268	248	215.686	239.344	241.667	261.667	204.225
313	134	124	112	146	145	157	168	165	180	209	213	187	207	226	238	256	234	254	278	273	242	307	307	298	324	309	319	350	344	359	372	372	372	430	438	436	590	601	599			313	268	248	219.608	239.344	241.667	261.667	204.225
314	134	124	112	147	145	157	168	166	180	209	213	187	207	226	238	257	235	254	279	273	242	308	307	298	325	309	320	350	344	360	373	373	372	431	439	437	592	602	600			314	268	248	219.608	240.984	241.667	261.667	204.225
315	135	124	112	147	145	158	169	166	180	209	213	188	207	227	238	258	236	254	279	274	243	308	307	299	325	309	322	352	345	360	375	374	372	432	441	438	593	603	602			315	270	248	219.608	240.984	241.667	263.333	204.225
316	136	124	112	147	146	159	169	166	181	210	213	188	207	227	239	258	236	255	279	274	244	309	308	300	325	310	322	352	347	360	375	376	372	433	442	439	594	604	603			316	272	248	219.608	240.984	243.333	265	205.634
317	136	124	112	147	146	159	169	166	181	210	213	188	207	227	239	258	236	255	279	274	244	309	308	300	325	310	322	352	347	360	375	376	372	433	442	439	594	604	603			317	272	248	219.608	240.984	243.333	265	205.634
318	136	124	113	148	148	159	170	166	183	212	214	189	209	228	239	259	236	256	281	275	244	310	308	301	327	311	322	355	347	362	375	378	375	436	443	441	598	606	606			318	272	248	221.569	242.623	246.667	265	208.451
319	136	125	113	148	148	161	170	167	183	212	215	190	210	229	240	262	237	256	281	275	246	310	309	305	327	311	326	357	350	362	378	379	375	438	443	442	599	609	608			319	272	250	221.569	242.623	246.667	268.333	208.451
320	137	126	113	148	150	162	170	170	183	214	216	190	211	230	241	262	242	257	284	277	246	313	310	305	328	314	327	359	351	365	382	381	376	440	446	444	602	609	615			320	274	252	221.569	242.623	250	270	211.268
321	137	127	113	148	151	162	170	170	183	214	216	190	212	230	241	262	242	258	285	277	247	314	310	305	328	316	327	360	352	365	382	382	377	441	447	445	603	610	616			321	274	254	221.569	242.623	251.667	270	212.676
322	137	127	113	148	151	162	170	170	183	214	217	190	212	230	242	263	242	258	286	277	247	315	310	305	329	316	327	360	352	365	382	382	377	441	447	445	603	611	616			322	274	254	221.569	242.623	251.667	270	212.676
323	137	128	113	148	151	162	171	170	184	216	217	190	213	231	243	263	244	259	288	278	248	317	311	305	329	319	327	361	352	368	383	383	378	441	449	446	604	613	618			323	274	256	221.569	242.623	251.667	270	212.676
324	137	128	113	149	151	162	171	170	184	217	217	190	213	233	243	264	245	259	288	278	248	318	312	307	331	319	327	363	352	368	384	383	379	442	449	447	606	615	618			324	274	256	221.569	244.262	251.667	270	212.676
325	137	128	113	150	151	164	171	172	184	218	218	191	213	234	243	264	247	259	288	279	249	319	314	308	332	321	327	365	354	368	385	384	381	445	450	447	607	617	620			325	274	256	221.569	245.902	251.667	273.333	212.676
326	138	129	113	151	152	164	171	172	184	220	218	192	215	236	244	264	249	261	289	279	251	321	316	311	336	322	327	366	354	369	387	384	384	447	450	449	611	620	622			326	276	258	221.569	247.541	253.333	273.333	214.085
327	138	129	113	152	152	164	171	172	184	221	218	192	215	237	244	264	249	263	290	279	252	321	317	311	336	324	327	366	354	371	387	385	384	448	450	449	612	621	623			327	276	258	221.569	249.18	253.333	273.333	214.085
328	138	129	113	153	152	166	171	172	185	222	218	192	215	238	245	264	250	264	290	281	254	323	319	313	339	324	328	367	356	373	389	388	384	449	453	449	613	623	626			328	276	258	221.569	250.82	253.333	276.667	214.085
329	139	129	113	153	153	166	171	173	186	222	220	193	217	239	245	264	252	265	290	282	255	325	319	314	339	326	329	368	357	374	390	388	385	450	455	450	615	625	627			329	278	258	221.569	250.82	255	276.667	215.493
330	139	129	113	153	153	169	171	175	187	222	222	193	217	240	246	264	252	268	290	284	257	327	319	314	339	326	332	368	357	376	391	390	386	451	457	451	615	626	630			330	278	258	221.569	250.82	255	281.667	215.493
331	139	129	114	153	154	169	171	175	188	222	222	194	218	241	246	265	252	268	290	285	257	327	319	315	340	326	333	369	357	376	392	390	387	452	458	452	617	627	631			331	278	258	223.529	250.82	256.667	281.667	216.901
332	139	129	117	153	156	170	171	176	188	223	222	194	220	241	246	265	253	269	290	285	258	328	322	317	342	326	335	371	359	376	395	390	388	455	458	455	621	629	633			332	278	258	229.412	250.82	260	283.333	219.718
333	140	130	118	153	157	170	171	177	188	223	222	196	221	242	247	267	254	269	294	285	258	330	322	317	344	327	336	371	361	377	396	391	390	456	459	458	625	632	634			333	280	260	231.373	250.82	261.667	283.333	221.127
334	140	130	118	153	158	170	171	177	188	223	222	196	221	242	248	268	254	269	294	286	258	330	323	317	344	327	337	371	361	378	397	391	390	457	459	458	625	632	635			334	280	260	231.373	250.82	263.333	283.333	222.535
335	140	130	118	153	158	170	172	177	189	223	223	198	222	243	249	269	255	270	295	286	259	330	325	317	344	329	338	372	362	379	398	393	391	457	461	458	625	634	637			335	280	260	231.373	250.82	263.333	283.333	222.535
336	141	131	118	153	158	171	173	177	190	224	223	199	222	244	249	269	255	270	296	287	259	330	325	317	345	330	338	373	364	379	400	394	391	458	463	460	627	634	640			336	282	262	231.373	250.82	263.333	285	222.535
337	141	132	118	153	159	171	173	177	192	225	224	199	222	246	249	269	256	270	298	288	259	331	325	317	345	331	340	375	365	380	401	396	392	460	465	463	630	637	641			337	282	264	231.373	250.82	265	285	223.944
338	141	132	118	153	159	171	173	177	192	225	224	199	222	246	249	269	256	271	298	288	260	331	325	318	345	332	340	376	365	380	402	396	392	460	465	463	630	638	641			338	282	264	231.373	250.82	265	285	223.944
339	142	132	118	153	159	171	174	178	192	226	225	199	222	248	249	269	256	271	298	288	260	332	326	318	346	333	341	377	366	381	402	398	393	460	467	464	631	640	642			339	284	264	231.373	250.82	265	285	223.944
340	142	132	118	154	159	171	174	178	192	226	225	200	223	248	249	269	257	271	299	288	260	332	326	318	346	333	341	378	366	381	402	398	394	461	467	464	632	640	643			340	284	264	231.373	252.459	265	285	223.944
341	142	132	119	154	160	172	174	178	192	226	226	201	225	249	249	270	259	271	300	288	261	333	326	319	346	333	344	379	367	382	404	399	394	463	467	465	634	642	644			341	284	264	233.333	252.459	266.667	286.667	225.352
342	142	132	119	156	160	172	174	178	193	226	226	202	227	249	250	272	259	272	300	288	263	334	326	321	347	333	347	379	368	383	407	399	395	465	467	465	636	644	646			342	284	264	233.333	255.738	266.667	286.667	225.352
343	142	132	119	156	160	172	174	178	193	226	228	202	227	249	250	273	259	273	301	288	263	334	326	321	347	334	347	381	368	383	407	401	395	465	467	465	636	645	647			343	284	264	233.333	255.738	266.667	286.667	225.352
344	143	133	119	156	162	173	174	180	194	227	230	202	227	251	251	274	259	275	302	289	264	336	328	322	348	335	347	381	371	383	407	405	395	467	468	467	639	646	650			344	286	266	233.333	255.738	270	288.333	228.169
345	143	133	120	156	163	173	175	180	195	228	231	203	227	251	252	276	259	275	303	290	265	336	330	322	349	335	349	383	371	385	408	406	397	468	470	468	640	648	652			345	286	266	235.294	255.738	271.667	288.333	229.577
346	143	133	120	157	163	173	175	180	196	228	231	204	227	251	252	276	259	275	303	290	265	337	330	323	349	336	349	383	372	385	409	406	397	469	470	468	641	649	652			346	286	266	235.294	257.377	271.667	288.333	229.577
347	143	133	120	157	163	173	175	181	196	228	231	205	228	251	252	276	260	275	303	290	265	338	330	323	349	337	349	383	372	386	409	406	397	469	471	468	641	650	652			347	286	266	235.294	257.377	271.667	288.333	229.577
348	144	133	121	158	163	172	175	181	197	228	232	205	230	251	252	277	261	275	304	290	266	338	331	325	350	337	350	385	372	385	411	405	398	469	471	470	643	650	654			348	288	266	237.255	259.016	271.667	286.667	229.577
349	145	133	121	158	164	172	175	181	198	229	233	205	230	251	253	277	261	275	305	290	267	338	331	325	350	338	350	385	373	386	413	405	398	470	472	471	644	651	655			349	290	266	237.255	259.016	273.333	286.667	230.986
350	145	133	121	158	164	172	175	181	198	229	233	205	230	251	253	277	261	275	305	290	267	338	331	325	350	338	350	385	373	386	413	405	398	470	472	471	644	651	655			350	290	266	237.255	259.016	273.333	286.667	230.986
351	145	133	121	158	164	172	176	181	198	229	233	206	230	251	254	277	262	275	306	290	267	338	331	325	350	338	350	385	373	387	414	405	398	470	473	471	644	651	656			351	290	266	237.255	259.016	273.333	286.667	230.986
352	146	133	121	158	165	172	177	181	198	230	233	208	231	253	255	278	263	275	306	290	269	339	333	328	353	339	351	385	373	390	415	407	399	472	474	473	646	654	658			352	292	266	237.255	259.016	275	286.667	232.394
353	146	134	121	158	165	173	178	181	198	230	233	208	232	253	255	278	264	275	307	290	269	339	335	328	353	340	351	385	374	391	415	407	401	472	476	474	647	654	660			353	292	268	237.255	259.016	275	288.333	232.394
354	146	134	121	158	166	173	178	182	199	231	233	209	232	254	256	279	264	276	308	290	270	339	337	329	353	343	352	385	374	393	416	409	402	473	477	474	648	657	661			354	292	268	237.255	259.016	276.667	288.333	233.803
355	146	136	121	159	166	173	178	182	199	231	234	209	232	254	256	280	265	277	310	291	270	339	339	330	355	344	352	386	375	393	417	412	402	474	477	476	650	660	662			355	292	272	237.255	260.656	276.667	288.333	233.803
356	146	136	120	160	166	173	178	182	199	232	234	210	232	254	256	281	265	276	310	292	270	340	340	331	356	344	352	386	375	394	418	411	403	475	477	475	651	660	663			356	292	272	235.294	262.295	276.667	288.333	233.803
357	146	137	120	160	167	173	178	183	199	232	234	210	233	254	256	282	266	276	312	292	270	341	340	331	356	344	353	386	376	394	419	411	404	476	478	476	653	661	664			357	292	274	235.294	262.295	278.333	288.333	235.211
358	146	137	120	160	168	173	180	183	199	233	235	211	233	255	257	282	267	276	313	293	270	341	341	331	356	346	353	387	376	394	419	412	406	477	479	476	654	664	664			358	292	274	235.294	262.295	280	288.333	236.62
359	146	138	120	160	169	173	180	183	201	235	236	212	234	255	257	282	268	277	314	294	270	341	344	332	358	348	353	388	377	395	420	414	407	478	481	477	656	665	667			359	292	276	235.294	262.295	281.667	288.333	238.028
360	146	138	121	160	169	174	180	183	201	235	236	212	234	256	257	282	269	278	314	295	271	341	345	334	359	350	353	391	377	395	422	415	407	479	482	478	657	667	668			360	292	276	237.255	262.295	281.667	290	238.028
361	147	138	121	160	169	174	180	183	202	235	237	213	234	257	259	283	271	278	315	297	271	343	346	334	362	350	353	391	379	395	425	416	407	479	483	479	658	669	670			361	294	276	237.255	262.295	281.667	290	238.028
362	148	139	121	160	170	175	180	185	203	235	239	217	235	258	260	284	272	280	315	299	271	347	346	337	365	350	355	393	381	396	425	420	409	481	486	481	661	670	675			362	296	278	237.255	262.295	283.333	291.667	239.437
363	149	139	123	161	170	175	180	185	203	235	241	217	235	258	262	284	273	281	316	299	272	348	348	339	366	352	355	393	383	398	426	420	411	482	489	484	664	672	677			363	298	278	241.176	263.934	283.333	291.667	239.437
364	149	139	123	162	170	175	181	185	204	235	241	217	236	258	263	286	273	281	318	299	272	349	348	339	367	352	356	394	384	398	426	422	411	483	490	484	665	674	677			364	298	278	241.176	265.574	283.333	291.667	239.437
365	149	139	123	162	170	175	182	185	204	236	241	217	236	258	263	286	274	281	319	299	272	349	348	339	367	353	356	394	385	398	427	422	411	483	491	484	665	674	678			365	298	278	241.176	265.574	283.333	291.667	239.437
366	150	139	123	164	170	175	183	185	205	237	241	218	237	258	264	287	276	281	322	299	272	349	348	340	367	355	357	395	387	399	428	423	413	485	493	485	667	676	680			366	300	278	241.176	268.852	283.333	291.667	239.437
367	152	139	124	164	173	175	183	185	205	237	244	219	239	258	266	288	278	282	325	299	272	351	348	342	369	356	358	397	389	401	429	424	416	488	493	488	671	679	683			367	304	278	243.137	268.852	288.333	291.667	243.662
368	153	139	124	164	174	175	183	185	207	238	246	219	240	259	266	289	280	283	327	300	273	351	350	343	370	356	361	398	392	402	429	426	419	489	497	490	674	681	686			368	306	278	243.137	268.852	290	291.667	245.07
369	153	139	124	164	174	176	184	186	208	239	246	220	241	260	268	290	281	284	327	302	275	353	351	343	370	359	362	400	395	402	431	426	422	490	499	490	674	685	687			369	306	278	243.137	268.852	290	293.333	245.07
370	153	139	124	165	175	176	184	186	210	241	247	221	242	260	270	293	282	284	328	303	277	355	351	345	373	360	363	401	396	405	433	427	424	492	501	490	676	690	687			370	306	278	243.137	270.492	291.667	293.333	246.479
371	153	139	124	166	175	176	184	186	210	241	247	221	242	261	270	293	282	284	328	304	277	356	351	345	373	360	363	401	396	406	433	427	425	493	501	490	677	690	688			371	306	278	243.137	272.131	291.667	293.333	246.479
372	154	140	124	167	175	177	184	188	210	243	247	221	242	262	270	294	284	285	330	307	277	357	351	345	374	363	364	402	397	408	436	428	426	494	503	492	679	692	691			372	308	280	243.137	273.77	291.667	295	246.479
373	155	140	124	167	175	177	186	189	210	244	247	221	243	262	271	294	284	286	330	308	279	358	352	345	374	364	365	403	398	409	436	429	428	494	506	493	680	695	691			373	310	280	243.137	273.77	291.667	295	246.479
374	156	140	124	168	177	180	186	193	211	244	249	221	245	262	273	295	285	287	332	310	280	358	353	345	374	367	368	404	401	411	438	431	431	499	507	495	683	697	696			374	312	280	243.137	275.41	295	300	249.296
375	156	140	125	168	177	180	187	193	211	244	250	221	246	262	273	295	285	289	332	310	280	358	354	346	375	367	368	404	402	411	438	432	432	500	508	496	684	697	698			375	312	280	245.098	275.41	295	300	249.296
376	156	140	125	168	177	180	187	193	211	244	251	221	246	262	274	296	285	289	332	311	280	360	354	346	375	367	369	404	402	411	438	434	432	500	508	496	684	699	698			376	312	280	245.098	275.41	295	300	249.296
377	156	141	125	168	177	181	187	194	212	246	251	221	246	262	274	296	285	290	333	311	280	360	355	346	376	367	369	404	403	412	438	434	434	501	509	497	685	699	700			377	312	282	245.098	275.41	295	301.667	249.296
378	156	141	126	168	177	182	188	194	212	246	252	221	247	263	275	296	287	290	334	311	280	360	357	349	377	370	370	405	406	414	438	434	439	502	511	498	686	702	703			378	312	282	247.059	275.41	295	303.333	249.296
379	157	141	128	168	178	184	188	196	212	246	253	222	249	263	276	297	288	290	334	311	281	360	359	350	379	371	371	406	408	415	439	435	441	505	511	501	689	704	705			379	314	282	250.98	275.41	296.667	306.667	250.704
380	157	142	129	168	178	185	189	197	212	247	254	222	249	263	277	298	288	291	335	312	281	360	360	350	381	371	371	407	408	416	440	436	442	507	511	503	691	704	708			380	314	284	252.941	275.41	296.667	308.333	250.704
381	157	142	129	168	178	185	189	197	212	247	254	222	249	263	277	298	288	291	335	312	281	360	360	350	381	371	371	407	408	416	440	436	442	507	511	503	691	704	708			381	314	284	252.941	275.41	296.667	308.333	250.704
382	157	142	129	168	179	186	189	197	212	247	254	222	249	264	277	299	288	291	335	312	282	360	361	351	381	371	372	407	408	417	440	437	443	508	512	503	692	705	709			382	314	284	252.941	275.41	298.333	310	252.113
383	157	143	130	168	181	186	190	197	214	249	255	222	250	266	277	299	290	292	335	314	284	360	362	353	383	372	373	408	410	419	442	439	445	510	515	507	697	710	710			383	314	286	254.902	275.41	301.667	310	254.93
384	157	144	130	168	181	187	190	198	215	250	255	222	251	267	277	299	291	292	336	315	284	360	363	353	384	372	374	409	411	420	443	440	446	511	516	509	699	711	712			384	314	288	254.902	275.41	301.667	311.667	254.93
385	157	145	130	168	182	187	190	198	215	250	255	224	254	267	277	301	292	293	337	315	287	360	365	353	385	375	374	412	411	421	443	440	449	512	518	510	700	712	715			385	314	290	254.902	275.41	303.333	311.667	256.338
386	157	145	130	169	182	188	190	199	215	250	255	224	256	267	277	302	292	293	337	316	287	360	365	353	386	376	374	412	411	422	444	440	450	513	519	510	701	713	716			386	314	290	254.902	277.049	303.333	313.333	256.338
387	157	145	133	169	183	189	190	200	216	249	257	225	258	268	276	302	292	295	338	316	289	363	365	354	389	378	374	412	413	424	445	442	452	515	521	513	704	716	717			387	314	290	260.784	277.049	305	315	257.746
388	157	145	133	170	183	189	190	200	217	250	258	225	258	270	276	302	293	295	338	318	289	364	366	355	390	378	375	413	414	425	445	442	454	516	522	514	706	717	719			388	314	290	260.784	278.689	305	315	257.746
389	157	145	133	170	183	189	190	200	217	250	258	225	258	270	276	302	293	295	338	318	289	364	366	355	390	378	375	413	414	425	445	442	454	516	522	514	706	717	719			389	314	290	260.784	278.689	305	315	257.746
390	157	145	133	170	183	189	190	200	218	250	259	225	258	272	276	302	293	296	338	319	289	364	367	355	391	379	375	414	415	425	445	443	454	516	524	515	707	719	719			390	314	290	260.784	278.689	305	315	257.746
391	158	145	133	171	183	189	191	200	218	251	260	226	258	273	277	304	294	297	339	321	290	364	369	355	393	381	376	415	417	426	445	446	456	517	526	517	710	723	720			391	316	290	260.784	280.328	305	315	257.746
392	158	145	133	171	183	189	191	200	218	251	260	226	258	273	277	304	294	297	339	321	290	364	369	355	393	381	376	415	417	426	445	446	456	517	526	517	710	723	720			392	316	290	260.784	280.328	305	315	257.746
393	159	145	133	172	183	190	192	200	219	251	260	227	258	274	278	304	295	297	340	321	291	364	370	355	393	382	378	417	417	426	446	447	457	518	528	518	711	725	721			393	318	290	260.784	281.967	305	316.667	257.746
394	159	145	134	172	185	191	192	202	220	252	261	227	258	275	278	305	295	297	340	321	291	365	371	357	394	382	378	418	419	426	447	448	458	521	528	519	713	726	723			394	318	290	262.745	281.967	308.333	318.333	260.563
395	159	145	135	172	185	191	192	202	221	252	263	227	259	276	278	306	295	299	342	322	291	367	372	358	395	383	380	419	420	427	449	449	459	521	531	520	714	730	723			395	318	290	264.706	281.967	308.333	318.333	260.563
396	159	145	135	172	185	191	193	203	222	252	263	227	261	276	278	306	296	301	344	322	291	368	373	358	396	383	382	419	421	428	449	451	459	521	534	520	714	732	724			396	318	290	264.706	281.967	308.333	318.333	260.563
397	159	145	135	172	185	191	193	203	222	252	263	227	261	276	278	306	296	301	344	322	291	368	373	358	396	383	382	419	421	428	449	451	459	521	534	520	714	732	724			397	318	290	264.706	281.967	308.333	318.333	260.563
398	159	146	136	172	185	191	193	203	223	252	263	228	262	277	278	306	296	301	346	322	291	369	373	358	397	383	383	419	422	429	449	451	461	521	535	522	716	733	725			398	318	292	266.667	281.967	308.333	318.333	260.563
399	160	146	136	173	185	191	193	203	223	252	264	228	263	278	278	307	296	302	346	322	292	371	373	360	398	384	383	420	422	430	450	451	462	522	535	523	718	735	725			399	320	292	266.667	283.607	308.333	318.333	260.563
400	160	148	137	174	185	192	194	203	223	252	264	229	264	278	280	307	296	306	347	323	293	373	375	364	399	387	383	423	424	432	453	453	464	524	537	526	721	738	730			400	320	296	268.627	285.246	308.333	320	260.563
[truncated: 34 more columns]
