# Supplementary material for: Empirical single-cell tracking and cell-fate simulation reveal dual roles of p53 in tumor suppression
Source: eLife. 2022 Sep 20;11:e72498. doi: 10.7554/eLife.72498 (PMC9560164; doi:10.7554/eLife.72498)
Supplement: Figure 1—figure supplement 4—source data 1. — Data used in Figure 1—figure supplement 4. [file elife-72498-fig1-figsupp4-data1.xlsx]

## Sheet: Figure 1-supplement 4
Time min x10	Number of particles
	Area1	Area2	Area3	Area4	Area5		Average
0	9	11	8	25	5		11.6
1	8	4	12	22	6		10.4
2	3	8	9	20	3		8.6
3	6	9	12	24	6		11.4
4	7	9	16	21	11		12.8
5	8	10	16	23	7		12.8
6	10	10	14	32	18		16.8
7	10	7	14	16	8		11
8	8	9	13	21	18		13.8
9	6	4	13	16	17		11.2
10	10	5	31	20	11		15.4
11	13	7	29	14	10		14.6
12	9	6	27	17	9		13.6
13	4	9	19	19	6		11.4
14	8	11	23	27	8		15.4
15	7	8	31	17	5		13.6
16	6	9	15	30	13		14.6
17	17	11	17	19	8		14.4
18	10	14	18	16	5		12.6
19	8	15	22	20	12		15.4
20	8	11	15	19	4		11.4
21	13	14	20	19	14		16
22	12	13	15	32	13		17
23	10	12	17	25	20		16.8
24	12	12	8	13	6		10.2
25	9	10	10	19	9		11.4			Area	Mean		Diffrence	Relatie to Control
26	12	18	24	15	3		14.4		Control-Backgroud	0.028	137.725		6.313	1
27	10	18	14	21	11		14.8		Control	0.028	131.412
28	9	18	13	21	10		14.2		MNNG1-Backgroud	0.028	138.349		6.821	1.08047
29	5	24	17	16	8		14		MNNG1	0.028	131.528
30	11	14	8	20	6		11.8		MNNG3-Backgroud	0.028	136.114		12.997	2.05877
31	8	16	13	37	15		17.8		MNNG3	0.028	123.117
32	6	14	25	33	11		17.8		MNNG7-Backgroud	0.028	129.205		36.712	5.8153
33	9	14	30	28	18		19.8		MNNG7	0.028	92.493
34	8	13	17	8	8		10.8		p53 siRNA-Backgroud	0.028	132.89		1.982	0.313955
35	12	5	12	20	4		10.6		p53 siRNA	0.028	130.908
36	8	7	15	22	8		12		p53 siRNA-MNNG1-Backgroud	0.028	134.605		3.78	0.598764
37	4	19	9	36	18		17.2		p53 siRNA-MNNG1	0.028	130.825
38	2	15	15	25	8		13		p53 siRNA-MNNG3-Backgroud	0.028	134.977		3.021	0.478536
39	6	11	11	25	7		12		p53 siRNA-MNNG3	0.028	131.956
40	8	12	13	20	8		12.2		p53 siRNA-MNNG7-Backgroud	0.028	134.094		4.515	0.715191
41	6	18	12	27	9		14.4		p53 siRNA-MNNG7	0.028	129.579
42	5	17	13	29	5		13.8
43	6	19	12	17	7		12.2
44	11	15	12	19	8		13
45	15	16	25	13	8		15.4
46	10	13	13	16	7		11.8
47	11	17	10	16	7		12.2
48	9	15	13	8	8		10.6
49	9	21	19	13	3		13
50	10	24	8	25	12		15.8
51	12	26	10	10	7		13
52	17	19	8	19	6		13.8
53	17	23	7	25	12		16.8
54	9	21	5	21	5		12.2
55	7	21	10	27	9		14.8
56	10	21	12	15	5		12.6
57	11	19	10	19	5		12.8
58	11	16	8	20	6		12.2
59	12	21	7	24	10		14.8
60	12	22	4	24	7		13.8
61	12	16	11	23	7		13.8
62	17	17	3	17	8		12.4
63	11	23	10	25	13		16.4
64	12	21	13	18	7		14.2
65	4	22	10	28	10		14.8
66	7	17	7	34	15		16
67	13	27	13	20	9		16.4
68	15	19	6	23	6		13.8
69	9	25	5	20	6		13
70	5	30	11	23	7		15.2
71	9	16	5	41	13		16.8
72	10	21	4	22	11		13.6
73	8	15	5	34	9		14.2
74	7	14	9	14	8		10.4
75	6	20	3	14	8		10.2
76	3	23	5	14	9		10.8
77	9	23	5	19	9		13
78	6	23	3	25	9		13.2
79	7	23	11	42	14		19.4
80	8	26	8	23	7		14.4
81	11	19	10	24	5		13.8
82	10	23	11	22	7		14.6
83	5	13	8	28	5		11.8
84	7	19	12	24	6		13.6
85	6	22	12	27	5		14.4
86	11	16	5	29	2		12.6
87	3	16	3	41	5		13.6
88	2	25	4	35	7		14.6
89	12	28	5	20	1		13.2
90	6	24	3	25	3		12.2
91	6	15	4	40	6		14.2
92	4	14	9	22	4		10.6
93	10	25	8	15	4		12.4
94	8	26	8	21	3		13.2
95	7	24	7	44	12		18.8
96	5	13	8	21	10		11.4
97	6	27	8	21	8		14
98	4	14	13	36	11		15.6
99	2	11	13	23	7		11.2
100	2	19	15	28	4		13.6
101	6	28	6	14	5		11.8
102	5	17	6	36	13		15.4
103	5	23	6	34	11		15.8
104	6	18	8	43	16		18.2
105	9	8	14	31	8		14
106	5	5	9	18	10		9.4
107	3	13	8	25	7		11.2
108	5	22	7	22	11		13.4
109	6	21	13	21	11		14.4
110	5	25	10	18	8		13.2
111	5	19	7	20	6		11.4
112	8	20	8	19	7		12.4
113	7	15	7	20	9		11.6
114	4	12	9	20	10		11
115	4	18	4	14	9		9.8
116	14	28	5	14	9		14
117	6	12	8	14	8		9.6
118	5	18	11	21	9		12.8
119	4	28	23	23	6		16.8
120	3	16	11	22	5		11.4
121	2	11	15	21	9		11.6
122	5	29	8	20	13		15
123	7	32	13	20	10		16.4
124	7	35	11	24	10		17.4
125	5	22	10	22	9		13.6
126	6	21	8	42	23		20
127	5	22	8	19	8		12.4
128	8	13	6	17	9		10.6
129	9	21	12	16	8		13.2
130	9	26	8	9	5		11.4
131	11	29	5	20	11		15.2
132	5	30	6	19	11		14.2
133	6	20	5	18	13		12.4
134	7	20	9	18	13		13.4
135	10	17	6	24	11		13.6
136	9	28	7	23	13		16
137	7	29	7	23	13		15.8
138	6	20	9	20	14		13.8
139	5	37	8	18	16		16.8
140	2	34	14	17	17		16.8
141	3	27	14	17	15		15.2
142	2	25	6	19	14		13.2
143	6	28	8	25	14		16.2
144	5	11	9	21	12		11.6
145	5	15	12	18	15		13
146	6	33	17	25	16		19.4
147	6	36	3	34	12		18.2
148	6	38	4	20	12		16
149	5	31	5	14	12		13.4
150	4	34	6	21	20		17
151	4	35	9	15	18		16.2
152	5	37	7	18	13		16
153	2	23	4	13	9		10.2
154	7	10	13	17	7		10.8
155	5	30	8	15	9		13.4
156	10	33	8	15	4		14
157	12	15	17	20	9		14.6
158	9	36	10	16	11		16.4
159	14	14	4	19	13		12.8
160	10	26	8	27	6		15.4
161	6	25	5	14	7		11.4
162	13	14	8	21	4		12
163	17	34	3	24	16		18.8
164	9	25	6	20	8		13.6
165	11	29	14	22	8		16.8
166	4	31	11	15	17		15.6
167	13	22	17	18	12		16.4
168	12	28	18	22	11		18.2
169	12	22	12	25	10		16.2
170	10	24	21	17	13		17
171	6	16	15	26	15		15.6
172	5	24	16	26	24		19
173	13	21	10	25	14		16.6
174	10	28	10	20	28		19.2
175	7	43	13	27	24		22.8
176	5	48	7	33	24		23.4
177	13	51	8	22	27		24.2
178	9	52	8	43	21		26.6
179	11	44	9	27	31		24.4
180	12	52	9	45	25		28.6
181	17	67	19	45	43		38.2
182	13	42	22	25	26		25.6
183	13	46	17	30	38		28.8
184	11	52	8	44	41		31.2
185	20	47	10	49	24		30
186	12	50	11	44	23		28
187	12	51	10	40	38		30.2
188	20	53	13	49	35		34
189	12	54	12	44	31		30.6
190	12	53	11	40	28		28.8
191	14	61	9	61	42		37.4
192	14	63	8	34	32		30.2
193	17	57	17	29	26		29.2
194	18	41	10	28	29		25.2
195	17	60	12	35	27		30.2
196	13	61	13	51	44		36.4
197	13	69	11	30	32		31
198	15	69	24	26	24		31.6
199	16	72	28	34	25		35
200	17	67	16	24	28		30.4
201	16	67	31	29	34		35.4
202	14	66	13	47	41		36.2
203	18	64	8	27	25		28.4
204	15	49	7	27	35		26.6
205	15	59	5	29	19		25.4
206	14	53	15	30	37		29.8
207	12	57	23	34	35		32.2
208	13	71	9	32	36		32.2
209	13	55	25	29	35		31.4
210	14	54	15	27	30		28
211	9	55	8	48	46		33.2
212	13	65	33	34	37		36.4
213	7	53	13	42	45		32
214	6	45	13	38	50		30.4
215	14	61	20	28	21		28.8
216	16	66	30	29	21		32.4
217	19	39	24	29	19		26
218	11	67	29	24	31		32.4
219	21	76	38	17	23		35
220	17	61	40	22	35		35
221	24	79	11	33	50		39.4
222	23	66	5	19	29		28.4
223	19	83	32	45	49		45.6
224	20	78	11	21	19		29.8
225	18	70	33	48	49		43.6
226	15	76	23	17	23		30.8
227	17	51	31	20	34		30.6
228	20	71	11	22	24		29.6
229	26	61	22	48	47		40.8
230	31	87	19	48	39		44.8
231	17	42	34	27	29		29.8
232	18	85	13	43	48		41.4
233	29	54	31	26	26		33.2
234	16	86	26	35	44		41.4
235	16	82	7	31	33		33.8
236	30	91	38	28	30		43.4
237	24	83	23	30	38		39.6
238	23	94	9	43	42		42.2
239	12	88	12	53	46		42.2
240	12	83	5	31	18		29.8
241	24	76	32	50	32		42.8
242	15	98	11	30	14		33.6
243	26	98	31	33	16		40.8
244	21	93	23	35	26		39.6
245	19	90	35	55	63		52.4
246	12	56	11	26	41		29.2
247	35	92	15	57	49		49.6
248	20	95	15	29	34		38.6
249	38	54	36	51	64		48.6
250	30	84	32	54	67		53.4
251	34	91	28	43	60		51.2
252	34	97	37	24	49		48.2
253	29	81	37	52	56		51
254	37	88	24	41	57		49.4
255	39	98	23	36	44		48
256	40	95	22	62	62		56.2
257	50	54	44	46	67		52.2
258	35	101	40	54	66		59.2
259	40	88	36	50	58		54.4
260	29	104	48	53	53		57.4
261	42	98	47	58	57		60.4
262	41	49	25	59	48		44.4
263	16	88	34	34	16		37.6
264	19	84	35	41	19		39.6
265	23	96	42	65	68		58.8
266	47	102	51	45	42		57.4
267	38	96	42	31	38		49
268	29	60	38	56	67		50
269	44	58	42	26	44		42.8
270	18	96	48	39	50		50.2
271	14	89	27	38	51		43.8
272	41	94	42	31	41		49.8
273	18	87	35	25	34		39.8
274	45	85	45	65	62		60.4
275	34	94	45	26	35		46.8
276	43	108	48	44	40		56.6
277	22	100	21	28	30		40.2
278	26	116	46	69	79		67.2
279	32	98	36	71	65		60.4
280	36	101	22	74	80		62.6
281	45	64	34	57	63		52.6
282	39	109	41	60	54		60.6
283	43	119	44	73	57		67.2
284	42	102	42	81	73		68
285	42	101	37	78	71		65.8
286	41	107	40	68	75		66.2
287	44	109	37	68	67		65
288	45	102	35	34	41		51.4
289	43	92	43	64	50		58.4
290	48	114	40	39	33		54.8
291	42	115	41	39	55		58.4
292	24	94	42	52	57		53.8
293	47	97	26	67	53		58
294	56	87	30	66	71		62
295	41	90	21	63	78		58.6
296	51	115	33	80	65		68.8
297	51	95	40	75	64		65
298	45	91	37	41	53		53.4
299	36	114	37	83	94		72.8
300	40	112	44	41	56		58.6
301	40	51	33	51	60		47
302	37	58	32	87	78		58.4
303	39	106	39	77	76		67.4
304	36	122	44	43	54		59.8
305	37	119	44	58	39		59.4
306	44	48	33	86	68		55.8
307	47	123	36	89	95		78
308	43	110	42	86	74		71
309	38	99	46	67	74		64.8
310	43	26	31	79	69		49.6
311	44	101	44	82	88		71.8
312	39	95	43	77	67		64.2
313	36	95	39	80	74		64.8
314	21	105	43	68	88		65
315	50	76	41	85	90		68.4
316	40	92	35	75	84		65.2
317	50	92	37	88	78		69
318	47	104	35	80	61		65.4
319	16	96	36	83	75		61.2
320	49	102	32	63	63		61.8
321	50	113	31	75	79		69.6
322	50	96	35	69	79		65.8
323	47	103	33	72	85		68
324	45	107	26	77	92		69.4
325	43	109	28	85	94		71.8
326	49	104	34	75	82		68.8
327	49	104	28	84	80		69
328	46	97	31	86	84		68.8
329	47	110	29	83	82		70.2
330	44	100	29	82	81		67.2
331	48	59	29	74	76		57.2
332	49	51	31	79	83		58.6
333	47	107	31	78	88		70.2
334	52	40	35	84	86		59.4
335	51	46	30	87	85		59.8
336	48	109	34	81	86		71.6
337	43	63	29	82	78		59
338	43	97	33	80	86		67.8
339	49	105	30	86	87		71.4
340	50	111	24	95	95		75
341	48	114	26	87	92		73.4
342	54	109	36	88	95		76.4
343	45	106	37	94	89		74.2
344	43	49	26	85	75		55.6
345	54	93	29	89	74		67.8
346	49	96	31	82	76		66.8
347	49	94	30	90	90		70.6
348	51	110	28	94	77		72
349	43	89	32	82	85		66.2
350	51	94	30	88	86		69.8
351	52	114	28	83	90		73.4
352	52	95	33	88	74		68.4
353	51	70	29	89	80		63.8
354	48	67	32	77	80		60.8
355	52	79	32	84	83		66
356	53	70	30	85	85		64.6
357	45	72	28	88	92		65
358	53	73	31	81	86		64.8
359	45	71	28	86	73		60.6
360	46	77	31	86	85		65
361	41	76	35	90	78		64
362	46	81	33	95	86		68.2
363	51	79	24	93	88		67
364	46	83	26	74	71		60
365	48	96	29	91	79		68.6
366	49	91	36	87	74		67.4
367	49	101	32	97	69		69.6
368	52	113	31	84	82		72.4
369	60	95	27	82	75		67.8
370	51	78	26	94	88		67.4
371	46	79	22	89	82		63.6
372	47	96	24	84	70		64.2
373	42	99	22	93	87		68.6
374	48	101	33	66	60		61.6
375	52	99	26	82	81		68
376	43	82	26	77	63		58.2
377	55	97	22	81	71		65.2
378	52	89	25	92	62		64
379	54	80	22	83	75		62.8
380	58	85	13	68	78		60.4
381	50	92	14	80	80		63.2
382	56	84	16	87	85		65.6
383	56	88	16	79	76		63
384	60	80	19	93	74		65.2
385	59	88	14	75	69		61
386	53	92	16	80	78		63.8
387	56	91	22	73	70		62.4
388	62	89	11	71	58		58.2
389	58	75	11	71	66		56.2
390	55	86	15	65	65		57.2
391	58	76	13	70	63		56
392	55	88	10	65	56		54.8
393	48	89	10	67	67		56.2
394	50	92	10	80	56		57.6
395	50	97	9	78	63		59.4
396	47	86	13	93	76		63
397	52	89	15	63	70		57.8
398	46	85	13	79	60		56.6
399	54	97	16	78	59		60.8
400	54	87	14	71	60		57.2
401	53	86	13	73	43		53.6
402	46	102	20	72	49		57.8
403	45	91	16	90	60		60.4
404	33	92	20	92	68		61
405	44	83	14	92	54		57.4
406	43	90	14	83	50		56
407	46	91	23	95	59		62.8
408	43	99	22	99	52		63
409	41	97	22	105	75		68
410	41	85	22	86	58		58.4
411	41	82	20	108	65		63.2
412	44	85	14	100	61		60.8
413	40	75	16	101	44		55.2
414	35	86	16	87	54		55.6
415	45	90	23	93	63		62.8
416	43	98	20	93	62		63.2
417	46	53	18	89	62		53.6
418	51	101	14	93	53		62.4
419	52	89	18	100	72		66.2
420	45	90	23	84	61		60.6
421	43	79	19	95	66		60.4
422	46	82	27	104	76		67
423	41	82	20	92	59		58.8
424	36	85	19	99	50		57.8
425	49	70	25	95	51		58
426	38	65	24	91	63		56.2
427	32	80	33	92	66		60.6
428	45	90	25	82	58		60
429	39	85	24	74	63		57
430	28	90	28	74	54		54.8
431	39	87	27	92	66		62.2
432	43	82	24	89	55		58.6
433	36	91	28	84	60		59.8
434	35	86	25	86	60		58.4
435	37	91	19	84	62		58.6
436	44	85	25	82	57		58.6
437	38	84	20	88	60		58
438	43	79	21	82	57		56.4
439	42	69	21	91	52		55
440	41	76	18	95	50		56
441	44	85	24	90	67		62
442	39	77	25	91	65		59.4
443	37	71	26	89	63		57.2
444	36	71	21	101	67		59.2
445	35	68	16	91	65		55
446	39	70	21	89	53		54.4
447	43	86	24	99	68		64
448	42	75	24	109	66		63.2
449	37	80	28	99	64		61.6
450	43	70	28	88	73		60.4
451	50	87	28	93	72		66
452	40	75	31	100	80		65.2
453	44	76	27	84	72		60.6
454	50	68	31	69	43		52.2
455	43	77	22	89	50		56.2
456	41	78	31	78	71		59.8
457	42	72	25	79	78		59.2
458	44	74	18	77	84		59.4
459	38	67	23	84	76		57.6
460	30	78	19	91	75		58.6
461	39	72	13	87	75		57.2
462	44	77	18	90	61		58
463	34	85	20	90	64		58.6
464	39	81	22	98	75		63
465	36	84	20	99	77		63.2
466	33	85	17	85	61		56.2
467	33	75	22	92	71		58.6
468	38	73	17	97	79		60.8
469	42	70	24	86	76		59.6
470	42	76	18	90	74		60
471	38	63	25	102	83		62.2
472	42	64	23	80	75		56.8
473	38	65	28	89	72		58.4
474	37	54	27	81	58		51.4
475	40	66	23	101	76		61.2
476	34	67	24	88	69		56.4
477	34	71	26	74	63		53.6
478	32	62	26	78	64		52.4
479	38	79	25	75	66		56.6
480	34	89	21	82	68		58.8
481	27	79	21	67	74		53.6
482	36	87	24	75	76		59.6
483	36	78	28	79	56		55.4
484	39	87	23	81	71		60.2
485	30	83	21	73	62		53.8
486	36	82	21	74	62		55
487	37	89	18	70	66		56
488	40	79	21	83	65		57.6
489	38	80	23	70	57		53.6
490	34	78	28	72	55		53.4
491	39	69	25	68	76		55.4
492	40	72	26	78	64		56
493	47	67	29	93	57		58.6
494	41	61	33	82	66		56.6
495	35	56	28	85	68		54.4
496	41	53	32	76	56		51.6
497	38	60	29	85	64		55.2
498	45	62	19	78	63		53.4
499	43	75	18	70	67		54.6
500	48	57	24	69	68		53.2
501	41	66	23	72	57		51.8
502	39	61	22	85	47		50.8
503	44	73	23	71	52		52.6
504	39	81	22	67	53		52.4
505	43	78	19	69	46		51
506	47	69	28	83	49		55.2
507	41	63	29	83	45		52.2
508	44	74	25	81	55		55.8
509	37	69	29	67	47		49.8
510	37	83	24	70	51		53
511	37	71	20	72	48		49.6
512	47	74	19	67	48		51
513	40	68	15	77	57		51.4
514	37	68	23	73	61		52.4
515	39	70	22	81	58		54
516	40	73	20	81	46		52
517	38	79	17	95	56		57
518	39	68	19	90	62		55.6
519	46	73	15	92	62		57.6
520	36	75	15	91	58		55
521	33	72	18	81	53		51.4
522	45	70	16	79	51		52.2
523	37	63	17	90	57		52.8
524	41	66	16	77	58		51.6
525	36	69	16	68	61		50
526	37	54	18	86	54		49.8
527	37	69	18	77	59		52
528	37	75	15	90	49		53.2
529	32	63	18	76	64		50.6
530	38	72	20	84	50		52.8
531	33	62	20	77	52		48.8
532	34	59	24	72	47		47.2
533	27	70	21	79	53		50
534	28	74	22	84	49		51.4
535	30	55	26	75	53		47.8
536	33	62	24	70	42		46.2
537	33	61	19	70	42		45
538	33	69	19	77	44		48.4
539	38	69	21	73	37		47.6
540	40	58	27	71	35		46.2
541	40	61	22	83	44		50
542	39	70	25	75	34		48.6
543	39	46	15	74	41		43
544	40	67	18	73	36		46.8
545	44	55	21	74	32		45.2
546	35	66	22	71	34		45.6
547	39	60	22	73	38		46.4
548	31	67	23	80	33		46.8
549	32	64	21	78	36		46.2
550	37	60	18	82	40		47.4
551	32	49	18	85	36		44
552	34	67	20	80	38		47.8
553	34	59	23	79	33		45.6
554	33	62	18	72	30		43
555	31	62	20	73	40		45.2
556	35	52	21	84	40		46.4
557	37	65	17	94	45		51.6
558	32	67	17	82	49		49.4
559	34	68	18	98	51		53.8
560	21	70	12	86	39		45.6
561	32	60	17	78	45		46.4
562	31	55	21	92	38		47.4
563	36	58	27	65	35		44.2
564	29	57	16	85	43		46
565	36	49	27	78	33		44.6
566	32	48	27	78	41		45.2
567	27	42	19	70	34		38.4
568	25	49	26	87	52		47.8
569	27	58	26	81	35		45.4
570	28	45	19	100	45		47.4
571	25	48	19	88	45		45
572	24	41	22	91	41		43.8
573	28	54	24	87	47		48
574	19	54	19	86	39		43.4
575	25	59	16	73	33		41.2
576	23	46	26	91	42		45.6
577	20	45	20	88	48		44.2
578	25	51	26	70	42		42.8
579	24	46	24	77	33		40.8
580	28	44	22	82	34		42
581	28	47	17	83	48		44.6
582	24	46	27	84	47		45.6
583	24	48	25	69	38		40.8
584	18	52	30	74	42		43.2
585	19	38	21	67	41		37.2
586	29	47	26	72	34		41.6
587	23	48	26	70	43		42
588	19	47	20	64	40		38
589	22	48	27	68	47		42.4
590	16	41	18	71	39		37
591	24	57	30	63	34		41.6
592	20	55	24	67	35		40.2
593	20	45	31	75	44		43
594	18	40	26	79	48		42.2
595	14	34	22	70	31		34.2
596	23	43	25	81	31		40.6
597	23	53	16	70	49		42.2
598	25	50	31	72	36		42.8
599	20	49	19	74	33		39
600	22	48	21	72	30		38.6
601	21	54	25	73	30		40.6
602	19	68	21	64	35		41.4
603	22	56	26	63	40		41.4
604	18	52	27	69	36		40.4
605	21	57	26	63	43		42
606	20	50	20	58	35		36.6
607	19	50	21	63	38		38.2
608	22	51	22	81	38		42.8
609	19	46	27	70	41		40.6
610	12	50	31	74	43		42
611	14	48	31	70	35		39.6
612	11	63	26	77	47		44.8
613	14	51	18	74	50		41.4
614	19	56	24	74	53		45.2
615	18	51	21	74	46		42
616	20	58	18	59	50		41
617	23	60	23	68	44		43.6
618	19	47	25	71	45		41.4
619	16	49	23	78	40		41.2
620	10	46	24	72	48		40
621	9	44	18	67	47		37
622	11	50	29	85	48		44.6
623	12	49	25	71	49		41.2
624	11	60	24	65	43		40.6
625	12	48	28	73	34		39
626	16	45	27	67	28		36.6
627	14	47	31	61	29		36.4
628	13	45	24	65	36		36.6
629	8	42	24	72	32		35.6
630	15	56	25	71	27		38.8
631	11	50	24	72	33		38
632	14	48	23	79	32		39.2
633	15	49	20	73	39		39.2
634	12	56	16	66	30		36
635	13	52	22	80	32		39.8
636	9	53	28	69	36		39
637	11	66	21	83	33		42.8
638	11	62	21	85	31		42
639	11	41	22	80	31		37
640	13	52	30	64	32		38.2
641	15	46	31	67	36		39
642	18	41	30	76	39		40.8
643	17	49	27	73	43		41.8
644	14	47	27	72	41		40.2
645	10	53	31	74	32		40
646	7	47	23	64	29		34
647	8	45	32	79	28		38.4
648	11	50	24	81	38		40.8
649	17	45	25	72	35		38.8
650	12	37	23	55	30		31.4
651	18	37	16	62	30		32.6
652	12	51	17	64	27		34.2
653	17	46	19	65	34		36.2
654	11	40	14	78	28		34.2
655	16	52	18	70	36		38.4
656	13	44	20	77	28		36.4
657	18	50	21	64	33		37.2
658	14	50	26	66	31		37.4
659	19	46	17	79	29		38
660	24	57	19	74	32		41.2
661	26	47	25	83	27		41.6
662	21	51	25	79	32		41.6
663	21	61	23	66	28		39.8
664	22	56	22	84	32		43.2
665	19	47	15	62	27		34
666	18	47	23	74	31		38.6
667	20	56	24	68	34		40.4
668	17	53	25	76	32		40.6
669	22	64	34	66	26		42.4
670	16	62	26	62	39		41
671	10	55	20	61	23		33.8
672	16	42	26	64	35		36.6
673	14	47	18	70	31		36
674	10	54	24	70	35		38.6
675	23	49	29	66	33		40
676	17	47	23	60	27		34.8
677	20	63	28	66	27		40.8
678	12	43	21	72	30		35.6
679	18	45	20	66	33		36.4
680	21	49	21	73	29		38.6
681	14	56	18	70	34		38.4
682	13	46	22	70	35		37.2
683	15	51	25	58	30		35.8
684	19	49	24	56	29		35.4
685	17	45	19	65	32		35.6
686	18	70	22	61	33		40.8
687	15	62	22	59	32		38
688	18	50	25	61	32		37.2
689	12	56	25	61	40		38.8
690	14	51	26	61	33		37
691	19	52	27	59	38		39
692	18	62	23	67	32		40.4
693	10	53	24	77	39		40.6
694	14	58	19	65	36		38.4
695	18	55	14	68	41		39.2
696	20	54	22	60	33		37.8
697	14	56	16	65	32		36.6
698	16	54	11	65	29		35
699	13	64	13	63	42		39
