# Supplementary material for: Empirical single-cell tracking and cell-fate simulation reveal dual roles of p53 in tumor suppression
Source: eLife. 2022 Sep 20;11:e72498. doi: 10.7554/eLife.72498 (PMC9560164; doi:10.7554/eLife.72498)
Supplement: Figure 2—source data 1. — Data used in Figure 2. [file elife-72498-fig2-data1.xlsx]

## Sheet: Cell count (a-f)
Control	Count																Control	Normalized to 100
	Video1						Video2			Video3								Video1						Video2			Video3
Time (min)	Area1	Area2	Area3	Area4	Area5	Area6	Area7	Area8	Area9	Area10	Area11	Area12	Area13	Area14	Area15		Time (min)	Area1	Area2	Area3	Area4	Area5	Area6	Area7	Area8	Area9	Area10	Area11	Area12	Area13	Area14	Area15
0	49	38	45	29	36	41	38	38	46	36	46	28	54	49	41		0	100	100	100	100	100	100	100	100	100	100	100	100	100	100	100
1000	59	48	57	39	41	47	40	52	63	44	59	40	61	60	48		1000	120.408	126.316	126.667	134.483	113.889	114.634	105.263	136.842	136.957	122.222	128.261	142.857	112.963	122.449	117.073
2000	71	67	70	61	63	80	60	67	70	56	91	51	69	68	55		2000	144.898	176.316	155.556	210.345	175	195.122	157.895	176.316	152.174	155.556	197.826	182.143	127.778	138.776	134.146
3000	89	90	98	74	79	101	75	87	83	78	114	85	90	86	94		3000	181.633	236.842	217.778	255.172	219.444	246.341	197.368	228.947	180.435	216.667	247.826	303.571	166.667	175.51	229.268
4000	114	111	123	89	98	134	105	115	125	105	155	90	150	133	124		4000	232.653	292.105	273.333	306.897	272.222	326.829	276.316	302.632	271.739	291.667	336.957	321.429	277.778	271.429	302.439
MNNG1	Count																MNNG1	Normalized to 100
	Video1						Video2			Video3								Video1						Video2			Video3
Time (min)	Area1	Area2	Area3	Area4	Area5	Area6	Area7	Area8	Area9	Area10	Area11	Area12	Area13	Area14	Area15		Time (min)	Area1	Area2	Area3	Area4	Area5	Area6	Area7	Area8	Area9	Area10	Area11	Area12	Area13	Area14	Area15
0	31	35	28	25	38	41	40	42	48	37	25	27	57	27	57		0	100	100	100	100	100	100	100	100	100	100	100	100	100	100	100
1000	43	41	40	39	47	49	51	59	64	41	32	35	68	36	73		1000	138.71	117.143	142.857	156	123.684	119.512	127.5	140.476	133.333	110.811	128	129.63	119.298	133.333	128.07
2000	55	58	60	56	66	71	64	72	80	56	44	52	84	52	80		2000	177.419	165.714	214.286	224	173.684	173.171	160	171.429	166.667	151.351	176	192.593	147.368	192.593	140.351
3000	67	77	75	77	76	90	96	109	90	81	64	70	126	66	106		3000	216.129	220	267.857	308	200	219.512	240	259.524	187.5	218.919	256	259.259	221.053	244.444	185.965
4000	86	109	98	97	99	113	123	127	133	111	84	95	172	91	171		4000	277.419	311.429	350	388	260.526	275.61	307.5	302.381	277.083	300	336	351.852	301.754	337.037	300
MNNG2	Count																MNNG2	Normalized to 100
	Video1						Video2			Video3								Video1						Video2			Video3
Time (min)	Area1	Area2	Area3	Area4	Area5	Area6	Area7	Area8	Area9	Area10	Area11	Area12	Area13	Area14	Area15		Time (min)	Area1	Area2	Area3	Area4	Area5	Area6	Area7	Area8	Area9	Area10	Area11	Area12	Area13	Area14	Area15
0	46	50	37	52	31	48	47	42	49	27	28	56	38	50	58		0	100	100	100	100	100	100	100	100	100	100	100	100	100	100	100
1000	52	58	46	72	36	67	54	68	58	35	32	60	46	58	90		1000	113.043	116	124.324	138.462	116.129	139.583	114.894	161.905	118.367	129.63	114.286	107.143	121.053	116	155.172
2000	69	74	61	84	51	79	68	79	65	45	40	67	54	75	103		2000	150	148	164.865	161.538	164.516	164.583	144.681	188.095	132.653	166.667	142.857	119.643	142.105	150	177.586
3000	87	90	71	95	63	101	88	93	78	66	57	107	76	93	141		3000	189.13	180	191.892	182.692	203.226	210.417	187.234	221.429	159.184	244.444	203.571	191.071	200	186	243.103
4000	109	118	90	117	73	136	122	115	113	70	69	136	99	142	170		4000	236.957	236	243.243	225	235.484	283.333	259.574	273.81	230.612	259.259	246.429	242.857	260.526	284	293.103
MNNG3	Count																MNNG3	Normalized to 100
	Video1						Video2			Video3								Video1						Video2			Video3
Time (min)	Area1	Area2	Area3	Area4	Area5	Area6	Area7	Area8	Area9	Area10	Area11	Area12	Area13	Area14	Area15		Time (min)	Area1	Area2	Area3	Area4	Area5	Area6	Area7	Area8	Area9	Area10	Area11	Area12	Area13	Area14	Area15
0	49	42	38	59	55	53	39	50	40	32	59	45	58	28	56		0	100	100	100	100	100	100	100	100	100	100	100	100	100	100	100
1000	50	55	49	59	56	65	43	55	49	38	69	46	59	37	59		1000	102.041	130.952	128.947	100	101.818	122.642	110.256	110	122.5	118.75	116.949	102.222	101.724	132.143	105.357
2000	54	58	49	65	63	69	47	57	52	40	70	47	62	38	66		2000	110.204	138.095	128.947	110.169	114.545	130.189	120.513	114	130	125	118.644	104.444	106.897	135.714	117.857
3000	59	59	58	70	65	76	52	61	53	42	75	47	65	45	67		3000	120.408	140.476	152.632	118.644	118.182	143.396	133.333	122	132.5	131.25	127.119	104.444	112.069	160.714	119.643
4000	63	62	63	75	68	84	55	65	55	48	77	48	69	48	68		4000	128.571	147.619	165.789	127.119	123.636	158.491	141.026	130	137.5	150	130.508	106.667	118.966	171.429	121.429
p53 RNAi	Count																p53 RNAi	Normalized to 100
	Video1						Video2			Video3								Video1						Video2			Video3
Time (min)	Area1	Area2	Area3	Area4	Area5	Area6	Area7	Area8	Area9	Area10	Area11	Area12	Area13	Area14	Area15		Time (min)	Area1	Area2	Area3	Area4	Area5	Area6	Area7	Area8	Area9	Area10	Area11	Area12	Area13	Area14	Area15
0	34	33	33	40	36	38	39	44	38	40	47	29	44	40	55		0	100	100	100	100	100	100	100	100	100	100	100	100	100	100	100
1000	41	40	53	47	51	51	49	53	53	43	58	45	62	44	72		1000	120.588	121.212	160.606	117.5	141.667	134.211	125.641	120.455	139.474	107.5	123.404	155.172	140.909	110	130.909
2000	58	52	70	71	61	69	56	58	67	57	75	53	85	56	89		2000	170.588	157.576	212.121	177.5	169.444	181.579	143.59	131.818	176.316	142.5	159.574	182.759	193.182	140	161.818
3000	75	78	78	83	82	74	60	79	71	86	106	74	101	70	118		3000	220.588	236.364	236.364	207.5	227.778	194.737	153.846	179.545	186.842	215	225.532	255.172	229.545	175	214.545
4000	92	84	101	102	94	103	102	111	114	110	131	88	122	113	153		4000	270.588	254.545	306.061	255	261.111	271.053	261.538	252.273	300	275	278.723	303.448	277.273	282.5	278.182
p53 RNAi-MNNG1	Count																p53 RNAi-MNNG1	Normalized to 100
	Video1						Video2			Video3								Video1						Video2			Video3
Time (min)	Area1	Area2	Area3	Area4	Area5	Area6	Area7	Area8	Area9	Area10	Area11	Area12	Area13	Area14	Area15		Time (min)	Area1	Area2	Area3	Area4	Area5	Area6	Area7	Area8	Area9	Area10	Area11	Area12	Area13	Area14	Area15
0	45	42	46	44	46	47	54	42	49	24	53	39	53	42	45		0	100	100	100	100	100	100	100	100	100	100	100	100	100	100	100
1000	58	50	57	53	63	59	61	57	68	29	65	54	72	62	55		1000	128.889	119.048	123.913	120.455	136.957	125.532	112.963	135.714	138.776	120.833	122.642	138.462	135.849	147.619	122.222
2000	83	72	82	69	88	87	71	61	83	45	88	63	90	69	69		2000	184.444	171.429	178.261	156.818	191.304	185.106	131.481	145.238	169.388	187.5	166.038	161.538	169.811	164.286	153.333
3000	92	87	91	94	98	101	95	78	107	53	102	82	106	79	81		3000	204.444	207.143	197.826	213.636	213.043	214.894	175.926	185.714	218.367	220.833	192.453	210.256	200	188.095	180
4000	115	109	118	104	112	131	131	103	134	58	130	98	138	107	118		4000	255.556	259.524	256.522	236.364	243.478	278.723	242.593	245.238	273.469	241.667	245.283	251.282	260.377	254.762	262.222
p53 RNAi-MNNG3	Count																p53 RNAi-MNNG3	Normalized to 100
	Video1						Video2			Video3								Video1						Video2			Video3
Time (min)	Area1	Area2	Area3	Area4	Area5	Area6	Area7	Area8	Area9	Area10	Area11	Area12	Area13	Area14	Area15		Time (min)	Area1	Area2	Area3	Area4	Area5	Area6	Area7	Area8	Area9	Area10	Area11	Area12	Area13	Area14	Area15
0	48	41	51	51	54	56	36	44	45	35	39	44	38	37	47		0	100	100	100	100	100	100	100	100	100	100	100	100	100	100	100
1000	58	48	56	58	66	61	39	63	63	36	48	49	54	52	53		1000	120.833	117.073	109.804	113.725	122.222	108.929	108.333	143.182	140	102.857	123.077	111.364	142.105	140.541	112.766
2000	63	67	72	79	78	79	58	67	68	41	58	55	73	65	60		2000	131.25	163.415	141.176	154.902	144.444	141.071	161.111	152.273	151.111	117.143	148.718	125	192.105	175.676	127.66
3000	101	83	87	90	100	91	70	76	72	49	69	71	80	68	70		3000	210.417	202.439	170.588	176.471	185.185	162.5	194.444	172.727	160	140	176.923	161.364	210.526	183.784	148.936
4000	110	93	115	95	120	103	83	95	88	65	91	95	89	91	104		4000	229.167	226.829	225.49	186.275	222.222	183.929	230.556	215.909	195.556	185.714	233.333	215.909	234.211	245.946	221.277
p53 RNAi-MNNG7	Count																p53 RNAi-MNNG7	Normalized to 100
	Video1						Video2			Video3								Video1						Video2			Video3
Time (min)	Area1	Area2	Area3	Area4	Area5	Area6	Area7	Area8	Area9	Area10	Area11	Area12	Area13	Area14	Area15		Time (min)	Area1	Area2	Area3	Area4	Area5	Area6	Area7	Area8	Area9	Area10	Area11	Area12	Area13	Area14	Area15
0	42	38	35	35	60	36	34	31	48	35	41	54	55	48	56		0	100	100	100	100	100	100	100	100	100	100	100	100	100	100	100
1000	49	41	40	39	67	45	46	38	55	43	57	57	59	55	62		1000	116.667	107.895	114.286	111.429	111.667	125	135.294	122.581	114.583	122.857	139.024	105.556	107.273	114.583	110.714
2000	58	43	46	49	76	50	47	39	56	51	60	69	65	70	78		2000	138.095	113.158	131.429	140	126.667	138.889	138.235	125.806	116.667	145.714	146.341	127.778	118.182	145.833	139.286
3000	64	51	52	53	82	58	48	40	65	57	62	76	72	76	80		3000	152.381	134.211	148.571	151.429	136.667	161.111	141.176	129.032	135.417	162.857	151.22	140.741	130.909	158.333	142.857
4000	76	58	58	65	91	60	51	43	67	59	78	80	79	79	85		4000	180.952	152.632	165.714	185.714	151.667	166.667	150	138.71	139.583	168.571	190.244	148.148	143.636	164.583	151.786

## Sheet: Cell count-statistics (a-f)
Ordinary One-way ANOVA					Unpaired t test
Contro-MNNG7					Control vs p53 RNAi
Tukey's multiple comparisons test	Summary	Adjusted P Value			P value	0.0745
Control vs. MNNG1	ns	0.1247			P value summary	ns
Control vs. MNNG3	**	0.0018			Significantly different (P < 0.05)?	No
Control vs. MNNG7	****	<0.0001			One- or two-tailed P value?	Two-tailed
MNNG1 vs. MNNG3	****	<0.0001
MNNG1 vs. MNNG7	****	<0.0001			MNNG1 vs p53 RNAi-MNNG1
MNNG3 vs. MNNG7	****	<0.0001			P value	<0.0001
					P value summary	****
p53 RNAi-MNNG7					Significantly different (P < 0.05)?	Yes
Tukey's multiple comparisons test	Summary	Adjusted P Value			One- or two-tailed P value?	Two-tailed
p53 RNAi-MNNG0 vs. p53 RNAi-MNNG1	**	0.0046
p53 RNAi-MNNG0 vs. p53 RNAi-MNNG3	****	<0.0001			MNNG3 vs p53 RNAi-MNNG3
p53 RNAi-MNNG0 vs. p53 RNAi-MNNG7	****	<0.0001			P value	<0.0001
p53 RNAi-MNNG1 vs. p53 RNAi-MNNG3	****	<0.0001			P value summary	****
p53 RNAi-MNNG1 vs. p53 RNAi-MNNG7	****	<0.0001			Significantly different (P < 0.05)?	Yes
p53 RNAi-MNNG3 vs. p53 RNAi-MNNG7	****	<0.0001			One- or two-tailed P value?	Two-tailed
					MNNG7 vs p53 RNAi-MNNG7
					P value	0.0013
					P value summary	**
					Significantly different (P < 0.05)?	Yes
					One- or two-tailed P value?	Two-tailed

## Sheet: Single-cell tracking (g-l)
	Number of cells									Difference
Time min x10	Control	MNNG1	MNNG3	MNNG7	p53 RNAi	p53 RNAi-MNNG1	p53 RNAi-MNNG3	p53 RNAi-MNNG7		Control	MNNG1	MNNG3	MNNG7	p53 RNAi	p53 RNAi-MNNG1	p53 RNAi-MNNG3	p53 RNAi-MNNG7
0	335	335	335	335	335	335	335	335
1	335	335	335	335	335	335	335	335		0	0	0	0	0	0	0	0
2	335	335	335	335	335	335	335	335		0	0	0	0	0	0	0	0
3	339	336	339	337	336	338	339	338		4	1	4	2	1	3	4	3
4	340	338	339	337	337	339	339	338		1	2	0	0	1	1	0	0
5	340	338	341	338	338	339	343	338		0	0	2	1	1	0	4	0
6	341	339	344	338	339	342	343	338		1	1	3	0	1	3	0	0
7	341	340	345	338	342	342	344	339		0	1	1	0	3	0	1	1
8	342	340	345	338	342	343	344	339		1	0	0	0	0	1	0	0
9	344	340	345	339	342	343	345	339		2	0	0	1	0	0	1	0
10	345	341	346	339	343	344	346	339		1	1	1	0	1	1	1	0
11	345	343	347	339	344	344	346	339		0	2	1	0	1	0	0	0
12	346	344	348	339	345	345	347	339		1	1	1	0	1	1	1	0
13	346	346	349	338	345	345	348	339		0	2	1	-1	0	0	1	0
14	346	346	350	338	346	346	348	340		0	0	1	0	1	1	0	1
15	346	349	350	338	346	346	350	340		0	3	0	0	0	0	2	0
16	346	348	351	338	346	346	352	340		0	-1	1	0	0	0	2	0
17	347	350	351	338	347	348	356	340		1	2	0	0	1	2	4	0
18	349	352	352	338	347	349	358	339		2	2	1	0	0	1	2	-1
19	351	352	353	339	347	349	359	339		2	0	1	1	0	0	1	0
20	353	353	354	340	349	350	359	339		2	1	1	1	2	1	0	0
21	356	353	354	340	351	350	359	340		3	0	0	0	2	0	0	1
22	356	354	356	340	352	351	360	342		0	1	2	0	1	1	1	2
23	356	354	356	341	353	351	360	345		0	0	0	1	1	0	0	3
24	359	355	356	341	353	352	360	346		3	1	0	0	0	1	0	1
25	359	355	357	342	355	353	360	346		0	0	1	1	2	1	0	0
26	361	357	358	343	355	353	360	346		2	2	1	1	0	0	0	0
27	361	358	359	343	355	354	360	344		0	1	1	0	0	1	0	-2
28	361	358	359	343	357	355	361	343		0	0	0	0	2	1	1	-1
29	361	358	359	344	357	355	361	343		0	0	0	1	0	0	0	0
30	361	359	359	344	357	356	364	343		0	1	0	0	0	1	3	0
31	362	360	359	344	358	356	364	343		1	1	0	0	1	0	0	0
32	362	361	360	344	359	358	364	343		0	1	1	0	1	2	0	0
33	362	361	360	346	359	359	365	343		0	0	0	2	0	1	1	0
34	362	361	361	346	359	359	365	343		0	0	1	0	0	0	0	0
35	364	361	362	348	359	359	368	343		2	0	1	2	0	0	3	0
36	368	361	364	348	360	361	368	346		4	0	2	0	1	2	0	3
37	369	363	364	348	361	361	368	346		1	2	0	0	1	0	0	0
38	370	363	364	348	362	364	369	347		1	0	0	0	1	3	1	1
39	371	364	365	349	364	367	370	347		1	1	1	1	2	3	1	0
40	372	364	368	349	364	368	373	347		1	0	3	0	0	1	3	0
41	372	364	368	349	365	369	373	347		0	0	0	0	1	1	0	0
42	373	365	370	349	366	370	374	347		1	1	2	0	1	1	1	0
43	374	365	371	349	368	371	375	347		1	0	1	0	2	1	1	0
44	375	367	373	349	368	372	375	347		1	2	2	0	0	1	0	0
45	377	367	373	349	368	373	375	347		2	0	0	0	0	1	0	0
46	379	367	373	349	368	375	376	348		2	0	0	0	0	2	1	1
47	381	367	373	349	368	375	376	348		2	0	0	0	0	0	0	0
48	383	368	374	349	368	375	376	348		2	1	1	0	0	0	0	0
49	385	369	374	349	372	378	377	348		2	1	0	0	4	3	1	0
50	385	369	376	350	372	377	380	348		0	0	2	1	0	-1	3	0
51	386	370	377	350	373	377	381	348		1	1	1	0	1	0	1	0
52	388	372	377	350	376	377	381	348		2	2	0	0	3	0	0	0
53	389	375	378	350	377	377	382	349		1	3	1	0	1	0	1	1
54	391	376	379	350	378	379	382	349		2	1	1	0	1	2	0	0
55	391	376	380	350	379	382	383	349		0	0	1	0	1	3	1	0
56	393	377	380	349	381	385	385	350		2	1	0	-1	2	3	2	1
57	393	377	381	349	382	386	385	350		0	0	1	0	1	1	0	0
58	395	379	381	350	386	387	385	350		2	2	0	1	4	1	0	0
59	396	379	381	350	387	388	385	350		1	0	0	0	1	1	0	0
60	396	379	382	351	388	391	385	351		0	0	1	1	1	3	0	1
61	397	382	382	351	391	396	386	351		1	3	0	0	3	5	1	0
62	399	384	382	351	392	397	386	351		2	2	0	0	1	1	0	0
63	400	387	382	351	392	398	386	351		1	3	0	0	0	1	0	0
64	402	390	382	351	395	400	386	351		2	3	0	0	3	2	0	0
65	403	391	382	351	396	401	388	352		1	1	0	0	1	1	2	1
66	405	392	383	351	399	401	389	353		2	1	1	0	3	0	1	1
67	408	394	385	351	399	402	390	353		3	2	2	0	0	1	1	0
68	412	394	385	351	401	403	392	353		4	0	0	0	2	1	2	0
69	412	395	385	351	402	406	393	353		0	1	0	0	1	3	1	0
70	412	396	385	352	405	409	395	353		0	1	0	1	3	3	2	0
71	412	396	385	352	405	412	395	354		0	0	0	0	0	3	0	1
72	414	397	386	352	406	412	396	354		2	1	1	0	1	0	1	0
73	416	398	386	352	407	414	396	354		2	1	0	0	1	2	0	0
74	417	401	386	352	409	414	396	355		1	3	0	0	2	0	0	1
75	417	403	388	352	411	416	397	355		0	2	2	0	2	2	1	0
76	419	406	389	352	410	418	399	355		2	3	1	0	-1	2	2	0
77	419	406	390	353	412	420	399	355		0	0	1	1	2	2	0	0
78	420	407	392	353	413	422	400	355		1	1	2	0	1	2	1	0
79	420	408	394	353	413	425	400	355		0	1	2	0	0	3	0	0
80	421	408	395	353	412	426	401	355		1	0	1	0	-1	1	1	0
81	422	410	396	353	412	430	399	355		1	2	1	0	0	4	-2	0
82	422	412	399	353	413	432	400	355		0	2	3	0	1	2	1	0
83	423	413	401	353	414	432	399	355		1	1	2	0	1	0	-1	0
84	424	414	401	353	415	432	401	356		1	1	0	0	1	0	2	1
85	425	416	403	354	418	433	402	355		1	2	2	1	3	1	1	-1
86	425	418	403	354	418	433	402	355		0	2	0	0	0	0	0	0
87	427	419	403	354	419	434	402	355		2	1	0	0	1	1	0	0
88	429	421	403	354	422	435	403	355		2	2	0	0	3	1	1	0
89	429	422	405	354	423	436	402	355		0	1	2	0	1	1	-1	0
90	429	423	407	354	424	436	403	355		0	1	2	0	1	0	1	0
91	431	423	407	355	425	441	404	355		2	0	0	1	1	5	1	0
92	431	426	407	355	426	442	404	354		0	3	0	0	1	1	0	-1
93	430	429	406	355	426	443	404	354		-1	3	-1	0	0	1	0	0
94	431	430	407	354	427	444	402	355		1	1	1	-1	1	1	-2	1
95	433	432	407	354	428	445	402	355		2	2	0	0	1	1	0	0
96	435	435	408	354	428	447	403	355		2	3	1	0	0	2	1	0
97	436	440	410	354	430	447	403	356		1	5	2	0	2	0	0	1
98	438	442	410	354	430	449	404	356		2	2	0	0	0	2	1	0
99	439	444	411	355	430	449	405	356		1	2	1	1	0	0	1	0
100	439	445	411	355	429	451	405	356		0	1	0	0	-1	2	0	0
101	440	446	414	355	432	453	406	356		1	1	3	0	3	2	1	0
102	440	447	415	355	434	457	406	356		0	1	1	0	2	4	0	0
103	442	447	415	354	436	458	407	355		2	0	0	-1	2	1	1	-1
104	445	451	417	354	437	460	407	356		3	4	2	0	1	2	0	1
105	445	455	417	354	439	462	407	356		0	4	0	0	2	2	0	0
106	447	455	417	354	440	462	407	356		2	0	0	0	1	0	0	0
107	449	457	422	355	441	463	408	357		2	2	5	1	1	1	1	1
108	450	459	423	355	443	464	408	357		1	2	1	0	2	1	0	0
109	450	460	425	355	444	465	408	358		0	1	2	0	1	1	0	1
110	450	466	425	355	447	465	410	359		0	6	0	0	3	0	2	1
111	450	467	425	355	448	465	412	359		0	1	0	0	1	0	2	0
112	450	469	426	355	451	468	411	359		0	2	1	0	3	3	-1	0
113	452	471	426	355	452	469	411	359		2	2	0	0	1	1	0	0
114	452	472	426	355	454	471	411	359		0	1	0	0	2	2	0	0
115	454	474	426	355	455	471	411	360		2	2	0	0	1	0	0	1
116	454	474	428	355	457	473	412	361		0	0	2	0	2	2	1	1
117	458	476	429	355	460	476	411	361		4	2	1	0	3	3	-1	0
118	460	477	431	355	459	476	412	362		2	1	2	0	-1	0	1	1
119	465	479	430	355	462	477	414	362		5	2	-1	0	3	1	2	0
120	467	482	432	355	462	477	414	362		2	3	2	0	0	0	0	0
121	468	484	433	355	466	478	415	362		1	2	1	0	4	1	1	0
122	469	488	433	356	466	479	416	363		1	4	0	1	0	1	1	1
123	471	492	435	356	469	480	416	364		2	4	2	0	3	1	0	1
124	473	499	436	356	470	480	416	364		2	7	1	0	1	0	0	0
125	475	500	436	356	470	484	418	365		2	1	0	0	0	4	2	1
126	478	500	438	356	471	487	419	365		3	0	2	0	1	3	1	0
127	479	503	439	355	473	487	420	364		1	3	1	-1	2	0	1	-1
128	481	506	439	356	475	490	420	364		2	3	0	1	2	3	0	0
129	484	509	440	356	476	491	420	364		3	3	1	0	1	1	0	0
130	488	511	441	356	478	495	421	364		4	2	1	0	2	4	1	0
131	491	516	441	356	479	494	422	364		3	5	0	0	1	-1	1	0
132	493	521	442	356	481	494	422	364		2	5	1	0	2	0	0	0
133	497	523	444	356	484	495	423	364		4	2	2	0	3	1	1	0
134	499	525	445	356	486	499	424	366		2	2	1	0	2	4	1	2
135	501	526	445	356	490	499	430	366		2	1	0	0	4	0	6	0
136	501	529	446	356	491	502	430	366		0	3	1	0	1	3	0	0
137	502	531	448	356	492	502	430	365		1	2	2	0	1	0	0	-1
138	504	532	449	356	494	500	432	365		2	1	1	0	2	-2	2	0
139	504	536	450	356	495	502	432	366		0	4	1	0	1	2	0	1
140	506	539	453	356	496	503	432	366		2	3	3	0	1	1	0	0
141	508	545	454	356	497	503	434	366		2	6	1	0	1	0	2	0
142	511	548	455	356	499	503	434	366		3	3	1	0	2	0	0	0
143	512	549	457	356	501	503	433	367		1	1	2	0	2	0	-1	1
144	513	552	458	356	504	505	433	368		1	3	1	0	3	2	0	1
145	513	553	459	356	504	505	433	368		0	1	1	0	0	0	0	0
146	515	553	460	356	506	505	434	369		2	0	1	0	2	0	1	1
147	517	558	462	356	509	506	436	370		2	5	2	0	3	1	2	1
148	517	560	466	356	512	508	436	370		0	2	4	0	3	2	0	0
149	519	562	466	356	515	509	438	371		2	2	0	0	3	1	2	1
150	521	562	469	356	518	511	439	371		2	0	3	0	3	2	1	0
151	522	563	471	356	520	513	440	372		1	1	2	0	2	2	1	1
152	526	565	474	356	522	515	441	372		4	2	3	0	2	2	1	0
153	527	565	476	356	523	518	443	372		1	0	2	0	1	3	2	0
154	533	568	479	356	524	520	445	372		6	3	3	0	1	2	2	0
155	537	571	480	356	523	521	446	373		4	3	1	0	-1	1	1	1
156	537	573	485	356	526	521	450	373		0	2	5	0	3	0	4	0
157	538	574	488	356	527	521	453	373		1	1	3	0	1	0	3	0
158	541	576	490	356	524	523	455	373		3	2	2	0	-3	2	2	0
159	545	576	491	356	528	526	457	373		4	0	1	0	4	3	2	0
160	550	576	495	356	528	528	457	373		5	0	4	0	0	2	0	0
161	551	579	497	356	529	529	457	373		1	3	2	0	1	1	0	0
162	551	583	497	356	530	529	456	373		0	4	0	0	1	0	-1	0
163	552	584	499	356	533	530	458	373		1	1	2	0	3	1	2	0
164	552	588	503	356	535	530	458	373		0	4	4	0	2	0	0	0
165	555	588	505	356	536	530	461	374		3	0	2	0	1	0	3	1
166	560	589	507	356	539	533	461	375		5	1	2	0	3	3	0	1
167	561	590	510	356	543	536	461	376		1	1	3	0	4	3	0	1
168	562	592	512	356	545	536	465	376		1	2	2	0	2	0	4	0
169	564	595	515	356	546	537	467	376		2	3	3	0	1	1	2	0
170	568	598	517	356	547	540	468	376		4	3	2	0	1	3	1	0
171	569	598	519	356	550	539	468	378		1	0	2	0	3	-1	0	2
172	569	603	522	356	556	539	467	378		0	5	3	0	6	0	-1	0
173	569	606	525	356	556	540	468	378		0	3	3	0	0	1	1	0
174	569	608	528	356	555	541	469	378		0	2	3	0	-1	1	1	0
175	571	609	530	357	556	542	470	378		2	1	2	1	1	1	1	0
176	573	610	530	357	559	544	475	378		2	1	0	0	3	2	5	0
177	574	613	532	357	563	544	476	378		1	3	2	0	4	0	1	0
178	575	613	536	357	565	546	477	378		1	0	4	0	2	2	1	0
179	576	613	538	358	567	549	477	378		1	0	2	1	2	3	0	0
180	577	613	538	358	569	551	477	379		1	0	0	0	2	2	0	1
181	582	616	539	358	570	551	479	379		5	3	1	0	1	0	2	0
182	584	618	540	358	573	553	483	379		2	2	1	0	3	2	4	0
183	585	619	541	358	575	555	485	379		1	1	1	0	2	2	2	0
184	587	620	545	358	576	556	486	380		2	1	4	0	1	1	1	1
185	591	622	547	358	576	555	488	381		4	2	2	0	0	-1	2	1
186	593	622	548	358	576	557	489	381		2	0	1	0	0	2	1	0
187	594	626	549	358	578	559	490	381		1	4	1	0	2	2	1	0
188	597	627	551	358	579	562	491	380		3	1	2	0	1	3	1	-1
189	598	629	552	358	580	563	495	380		1	2	1	0	1	1	4	0
190	601	631	552	358	581	565	497	381		3	2	0	0	1	2	2	1
191	601	632	553	358	581	569	498	381		0	1	1	0	0	4	1	0
192	601	633	558	359	582	568	498	381		0	1	5	1	1	-1	0	0
193	604	633	560	359	584	568	499	381		3	0	2	0	2	0	1	0
194	606	637	562	359	584	568	499	381		2	4	2	0	0	0	0	0
195	607	639	562	360	584	566	501	381		1	2	0	1	0	-2	2	0
196	608	640	563	359	585	566	503	381		1	1	1	-1	1	0	2	0
197	612	642	564	359	587	569	507	381		4	2	1	0	2	3	4	0
198	612	643	564	359	589	570	507	382		0	1	0	0	2	1	0	1
199	612	643	566	359	589	572	508	382		0	0	2	0	0	2	1	0
200	616	645	569	359	586	573	513	382		4	2	3	0	-3	1	5	0
201	617	646	570	359	588	573	512	382		1	1	1	0	2	0	-1	0
202	619	647	571	359	587	574	512	382		2	1	1	0	-1	1	0	0
203	620	648	572	359	588	575	514	382		1	1	1	0	1	1	2	0
204	622	648	574	359	588	577	514	382		2	0	2	0	0	2	0	0
205	625	648	575	359	588	580	517	382		3	0	1	0	0	3	3	0
206	626	648	577	359	589	580	518	382		1	0	2	0	1	0	1	0
207	628	650	579	359	591	582	519	381		2	2	2	0	2	2	1	-1
208	629	651	580	359	593	583	520	382		1	1	1	0	2	1	1	1
209	630	652	583	359	595	583	520	382		1	1	3	0	2	0	0	0
210	631	652	584	360	596	584	522	382		1	0	1	1	1	1	2	0
211	631	652	587	360	596	584	524	382		0	0	3	0	0	0	2	0
212	631	653	589	360	595	586	525	382		0	1	2	0	-1	2	1	0
213	633	656	591	361	598	587	526	384		2	3	2	1	3	1	1	2
214	635	658	593	361	600	588	526	384		2	2	2	0	2	1	0	0
215	636	660	594	361	601	590	531	385		1	2	1	0	1	2	5	1
216	637	661	595	361	602	592	532	385		1	1	1	0	1	2	1	0
217	640	662	596	361	604	592	533	387		3	1	1	0	2	0	1	2
218	641	663	596	362	605	595	534	386		1	1	0	1	1	3	1	-1
219	642	663	598	364	604	596	535	388		1	0	2	2	-1	1	1	2
220	644	664	599	364	606	597	535	388		2	1	1	0	2	1	0	0
221	647	665	599	364	608	598	536	388		3	1	0	0	2	1	1	0
222	650	666	599	363	609	599	538	388		3	1	0	-1	1	1	2	0
223	653	667	601	363	609	600	540	389		3	1	2	0	0	1	2	1
224	656	667	601	363	610	601	542	391		3	0	0	0	1	1	2	2
225	659	670	602	363	610	602	544	391		3	3	1	0	0	1	2	0
226	660	671	605	363	610	603	546	391		1	1	3	0	0	1	2	0
227	662	675	607	363	611	603	546	391		2	4	2	0	1	0	0	0
228	666	675	610	363	612	604	547	391		4	0	3	0	1	1	1	0
229	667	677	612	363	614	605	547	391		1	2	2	0	2	1	0	0
230	670	681	612	363	614	606	548	392		3	4	0	0	0	1	1	1
231	673	682	615	362	616	608	550	393		3	1	3	-1	2	2	2	1
232	676	686	616	362	617	607	552	393		3	4	1	0	1	-1	2	0
233	678	689	619	362	618	610	555	393		2	3	3	0	1	3	3	0
234	680	690	620	362	619	611	556	393		2	1	1	0	1	1	1	0
235	681	691	623	362	622	611	560	393		1	1	3	0	3	0	4	0
236	683	695	625	363	629	612	560	392		2	4	2	1	7	1	0	-1
237	684	698	626	363	633	613	561	393		1	3	1	0	4	1	1	1
238	685	698	629	364	634	614	563	393		1	0	3	1	1	1	2	0
239	687	699	629	364	633	616	563	393		2	1	0	0	-1	2	0	0
240	689	701	629	365	633	616	564	393		2	2	0	1	0	0	1	0
241	692	702	632	365	633	617	564	396		3	1	3	0	0	1	0	3
242	696	707	632	365	633	619	565	396		4	5	0	0	0	2	1	0
243	697	710	632	364	640	619	565	398		1	3	0	-1	7	0	0	2
244	698	711	637	365	640	621	567	398		1	1	5	1	0	2	2	0
245	700	712	637	365	641	620	570	399		2	1	0	0	1	-1	3	1
246	701	715	638	366	641	621	570	400		1	3	1	1	0	1	0	1
247	704	717	640	366	640	623	570	400		3	2	2	0	-1	2	0	0
248	705	719	643	366	641	623	570	400		1	2	3	0	1	0	0	0
249	707	721	646	366	643	623	570	402		2	2	3	0	2	0	0	2
250	714	721	648	366	643	623	570	402		7	0	2	0	0	0	0	0
251	717	723	649	366	646	623	570	403		3	2	1	0	3	0	0	1
252	720	726	651	367	645	625	570	403		3	3	2	1	-1	2	0	0
253	721	727	652	367	646	625	572	403		1	1	1	0	1	0	2	0
254	722	727	654	367	646	628	575	404		1	0	2	0	0	3	3	1
255	725	729	655	367	646	630	574	404		3	2	1	0	0	2	-1	0
256	728	732	658	367	646	632	577	404		3	3	3	0	0	2	3	0
257	732	736	658	368	651	634	580	406		4	4	0	1	5	2	3	2
258	736	738	658	368	651	639	582	406		4	2	0	0	0	5	2	0
259	738	739	662	368	650	640	583	408		2	1	4	0	-1	1	1	2
260	740	741	665	368	650	641	584	409		2	2	3	0	0	1	1	1
261	743	744	666	368	651	646	587	411		3	3	1	0	1	5	3	2
262	745	746	668	369	653	647	588	411		2	2	2	1	2	1	1	0
263	746	747	668	369	656	648	589	410		1	1	0	0	3	1	1	-1
264	749	748	672	370	659	650	590	411		3	1	4	1	3	2	1	1
265	749	749	673	370	661	650	592	411		0	1	1	0	2	0	2	0
266	752	753	676	370	664	652	592	411		3	4	3	0	3	2	0	0
267	756	753	680	371	670	655	593	411		4	0	4	1	6	3	1	0
268	756	758	681	371	673	657	595	411		0	5	1	0	3	2	2	0
269	758	762	683	371	676	658	595	411		2	4	2	0	3	1	0	0
270	760	763	683	372	678	659	595	412		2	1	0	1	2	1	0	1
271	763	767	684	372	679	660	595	412		3	4	1	0	1	1	0	0
272	763	769	686	372	683	661	595	412		0	2	2	0	4	1	0	0
273	765	772	686	371	685	661	595	411		2	3	0	-1	2	0	0	-1
274	768	772	691	371	688	661	596	411		3	0	5	0	3	0	1	0
275	771	774	695	371	690	663	596	414		3	2	4	0	2	2	0	3
276	773	778	696	371	691	668	596	413		2	4	1	0	1	5	0	-1
277	774	780	698	371	691	670	597	413		1	2	2	0	0	2	1	0
278	775	783	700	371	693	670	598	413		1	3	2	0	2	0	1	0
279	777	789	701	371	695	672	598	413		2	6	1	0	2	2	0	0
280	777	793	703	371	695	673	598	413		0	4	2	0	0	1	0	0
281	779	798	703	372	698	672	599	413		2	5	0	1	3	-1	1	0
282	781	801	704	372	702	674	602	413		2	3	1	0	4	2	3	0
283	782	804	705	372	702	675	602	413		1	3	1	0	0	1	0	0
284	783	807	706	372	702	676	601	413		1	3	1	0	0	1	-1	0
285	785	812	708	372	705	677	602	413		2	5	2	0	3	1	1	0
286	787	813	710	372	711	677	604	413		2	1	2	0	6	0	2	0
287	789	819	710	372	712	682	603	414		2	6	0	0	1	5	-1	1
288	789	821	711	372	714	687	604	414		0	2	1	0	2	5	1	0
289	791	823	712	372	716	688	604	414		2	2	1	0	2	1	0	0
290	793	825	716	372	720	689	605	415		2	2	4	0	4	1	1	1
291	795	826	717	372	722	689	605	415		2	1	1	0	2	0	0	0
292	796	828	720	372	723	689	606	415		1	2	3	0	1	0	1	0
293	799	830	721	372	724	691	607	415		3	2	1	0	1	2	1	0
294	800	830	725	372	726	692	608	416		1	0	4	0	2	1	1	1
295	800	832	729	372	729	693	609	416		0	2	4	0	3	1	1	0
296	805	835	730	372	731	696	609	416		5	3	1	0	2	3	0	0
297	806	837	732	372	734	698	611	416		1	2	2	0	3	2	2	0
298	809	845	735	372	739	701	611	416		3	8	3	0	5	3	0	0
299	811	846	737	372	745	706	612	417		2	1	2	0	6	5	1	1
300	815	846	739	372	749	711	613	417		4	0	2	0	4	5	1	0
301	817	847	740	372	752	713	613	417		2	1	1	0	3	2	0	0
302	821	848	742	372	754	715	617	418		4	1	2	0	2	2	4	1
303	824	854	744	372	757	717	618	418		3	6	2	0	3	2	1	0
304	826	859	745	372	757	718	617	417		2	5	1	0	0	1	-1	-1
305	829	863	745	373	762	718	619	417		3	4	0	1	5	0	2	0
306	834	865	745	373	765	719	620	418		5	2	0	0	3	1	1	1
307	835	869	745	373	767	722	620	419		1	4	0	0	2	3	0	1
308	836	870	745	373	770	723	623	419		1	1	0	0	3	1	3	0
309	837	872	746	374	771	724	625	419		1	2	1	1	1	1	2	0
310	838	874	747	374	773	727	626	419		1	2	1	0	2	3	1	0
311	843	881	747	374	774	730	627	420		5	7	0	0	1	3	1	1
312	846	886	751	374	777	731	627	423		3	5	4	0	3	1	0	3
313	849	892	754	374	778	732	628	423		3	6	3	0	1	1	1	0
314	850	896	756	373	781	734	629	424		1	4	2	-1	3	2	1	1
315	852	900	757	373	784	735	631	424		2	4	1	0	3	1	2	0
316	853	903	759	373	786	736	631	424		1	3	2	0	2	1	0	0
317	853	905	762	374	790	737	631	425		0	2	3	1	4	1	0	1
318	856	906	762	374	793	740	631	424		3	1	0	0	3	3	0	-1
319	859	908	764	374	797	742	633	424		3	2	2	0	4	2	2	0
320	865	912	766	375	796	743	633	424		6	4	2	1	-1	1	0	0
321	866	913	769	375	797	746	635	425		1	1	3	0	1	3	2	1
322	867	915	771	375	799	746	638	425		1	2	2	0	2	0	3	0
323	871	917	771	375	802	747	641	425		4	2	0	0	3	1	3	0
324	872	920	772	376	804	749	643	425		1	3	1	1	2	2	2	0
325	876	924	776	376	807	750	647	426		4	4	4	0	3	1	4	1
326	880	925	780	376	807	752	647	426		4	1	4	0	0	2	0	0
327	881	926	782	376	811	752	649	426		1	1	2	0	4	0	2	0
328	885	928	785	376	814	753	650	427		4	2	3	0	3	1	1	1
329	887	933	786	376	815	754	651	427		2	5	1	0	1	1	1	0
330	891	935	786	376	818	758	653	426		4	2	0	0	3	4	2	-1
331	892	937	788	376	820	758	653	425		1	2	2	0	2	0	0	-1
332	896	943	788	376	822	758	653	425		4	6	0	0	2	0	0	0
333	898	946	789	376	826	763	655	425		2	3	1	0	4	5	2	0
334	899	948	790	376	827	768	655	425		1	2	1	0	1	5	0	0
335	900	949	791	375	829	770	657	424		1	1	1	-1	2	2	2	-1
336	903	953	795	375	831	772	657	424		3	4	4	0	2	2	0	0
337	906	954	797	375	833	773	657	422		3	1	2	0	2	1	0	-2
338	907	957	801	375	836	774	659	422		1	3	4	0	3	1	2	0
339	910	958	801	375	839	775	661	422		3	1	0	0	3	1	2	0
340	911	961	802	375	841	778	662	422		1	3	1	0	2	3	1	0
341	913	965	803	375	844	779	665	423		2	4	1	0	3	1	3	1
342	917	968	804	375	846	781	665	422		4	3	1	0	2	2	0	-1
343	918	976	804	375	849	783	666	422		1	8	0	0	3	2	1	0
344	922	979	805	375	851	785	666	422		4	3	1	0	2	2	0	0
345	925	984	806	375	851	787	668	423		3	5	1	0	0	2	2	1
346	926	984	814	375	854	791	669	423		1	0	8	0	3	4	1	0
347	927	985	815	375	857	792	670	423		1	1	1	0	3	1	1	0
348	929	987	816	375	864	793	670	423		2	2	1	0	7	1	0	0
349	930	988	819	375	867	794	672	423		1	1	3	0	3	1	2	0
350	930	991	821	375	873	796	672	424		0	3	2	0	6	2	0	1
351	930	993	824	375	875	797	672	424		0	2	3	0	2	1	0	0
352	935	994	826	375	875	800	672	424		5	1	2	0	0	3	0	0
353	936	996	827	375	876	803	672	424		1	2	1	0	1	3	0	0
354	940	999	830	376	878	805	678	424		4	3	3	1	2	2	6	0
355	943	1003	834	377	880	808	678	424		3	4	4	1	2	3	0	0
356	943	1004	834	377	882	811	679	425		0	1	0	0	2	3	1	1
357	944	1005	837	377	884	816	681	425		1	1	3	0	2	5	2	0
358	947	1008	840	378	888	818	684	426		3	3	3	1	4	2	3	1
359	950	1010	842	379	894	820	685	427		3	2	2	1	6	2	1	1
360	953	1012	847	380	901	824	687	427		3	2	5	1	7	4	2	0
361	955	1014	847	381	905	829	690	427		2	2	0	1	4	5	3	0
362	960	1015	850	381	912	829	691	427		5	1	3	0	7	0	1	0
363	963	1019	852	381	918	829	694	427		3	4	2	0	6	0	3	0
364	965	1022	852	381	921	832	694	427		2	3	0	0	3	3	0	0
365	965	1024	854	381	922	835	695	429		0	2	2	0	1	3	1	2
366	967	1029	854	381	929	835	696	429		2	5	0	0	7	0	1	0
367	971	1029	856	381	932	836	697	429		4	0	2	0	3	1	1	0
368	976	1031	857	381	937	840	698	430		5	2	1	0	5	4	1	1
369	978	1033	861	381	942	842	699	430		2	2	4	0	5	2	1	0
370	982	1034	862	381	946	843	701	431		4	1	1	0	4	1	2	1
371	982	1039	866	381	949	846	701	432		0	5	4	0	3	3	0	1
372	986	1040	866	381	952	847	705	432		4	1	0	0	3	1	4	0
373	988	1046	866	381	955	850	705	432		2	6	0	0	3	3	0	0
374	993	1049	866	381	958	852	707	433		5	3	0	0	3	2	2	1
375	994	1050	867	381	958	854	710	434		1	1	1	0	0	2	3	1
376	996	1054	869	381	959	855	711	435		2	4	2	0	1	1	1	1
377	997	1056	870	381	962	857	712	436		1	2	1	0	3	2	1	1
378	1001	1061	872	381	963	858	719	436		4	5	2	0	1	1	7	0
379	1004	1064	873	381	968	859	722	436		3	3	1	0	5	1	3	0
380	1006	1066	874	381	972	859	725	437		2	2	1	0	4	0	3	1
381	1006	1069	879	381	974	861	724	440		0	3	5	0	2	2	-1	3
382	1008	1071	880	381	977	862	730	440		2	2	1	0	3	1	6	0
383	1013	1071	885	381	980	864	732	440		5	0	5	0	3	2	2	0
384	1016	1073	888	382	983	864	736	440		3	2	3	1	3	0	4	0
385	1018	1075	890	382	985	865	739	440		2	2	2	0	2	1	3	0
386	1020	1079	892	382	988	867	741	440		2	4	2	0	3	2	2	0
387	1022	1082	893	382	988	867	742	440		2	3	1	0	0	0	1	0
388	1024	1084	896	382	990	870	743	441		2	2	3	0	2	3	1	1
389	1024	1086	898	383	992	870	744	441		0	2	2	1	2	0	1	0
390	1025	1088	899	383	997	872	746	441		1	2	1	0	5	2	2	0
391	1028	1091	901	383	1001	875	748	441		3	3	2	0	4	3	2	0
392	1028	1093	904	383	1007	878	748	443		0	2	3	0	6	3	0	2
393	1030	1096	910	384	1008	878	749	444		2	3	6	1	1	0	1	1
394	1033	1098	910	384	1010	883	751	444		3	2	0	0	2	5	2	0
395	1037	1101	913	384	1013	886	752	444		4	3	3	0	3	3	1	0
396	1039	1101	916	384	1013	886	754	444		2	0	3	0	0	0	2	0
397	1039	1103	918	384	1015	886	754	443		0	2	2	0	2	0	0	-1
398	1040	1104	921	384	1018	889	756	445		1	1	3	0	3	3	2	2
399	1041	1106	922	384	1019	891	761	444		1	2	1	0	1	2	5	-1
400	1048	1113	924	384	1026	893	765	444		7	7	2	0	7	2	4	0

## Sheet: Tracking-statistics (g-l)
Unpaired t test
Control vs p53 RNAi
P value	0.02
P value summary	*
Significantly different (P < 0.05)?	Yes
One- or two-tailed P value?	Two-tailed
MNNG1 vs p53 RNAi-MNNG1
P value	<0.0001
P value summary	****
Significantly different (P < 0.05)?	Yes
One- or two-tailed P value?	Two-tailed
MNNG3 vs p53 RNAi-MNNG3
P value	<0.0001
P value summary	****
Significantly different (P < 0.05)?	Yes
One- or two-tailed P value?	Two-tailed
MNNG7 vs p53 RNAi-MNNG7
P value	<0.0001
P value summary	****
Significantly different (P < 0.05)?	Yes
One- or two-tailed P value?	Two-tailed
