# Supplementary material for: Empirical single-cell tracking and cell-fate simulation reveal dual roles of p53 in tumor suppression
Source: eLife. 2022 Sep 20;11:e72498. doi: 10.7554/eLife.72498 (PMC9560164; doi:10.7554/eLife.72498)
Supplement: Figure 3—source data 1. — Data used in Figure 3. [file elife-72498-fig3-data1.xlsx]

## Sheet: Figure 3
No of progeny
No of progeny	Control	MNNG1	MNNG3	MNNG7	p53 RNAi	p53 RNAi-MNNG1	p53 RNAi-MNNG3	p53 RNAi-MNNG7
1 to 2	31	18	35	278	32	36	55	219
3 to 4	319	273	417	153	288	432	514	293
5 to 6	260	241	276	25	273	266	217	56
7 to 8	798	1057	645	7	823	596	435	56
9 to 10	117	54	63	0	90	47	9	0
11 to 12	33	132	44	0	143	77	44	0
13 to 14	104	52	13	0	117	52	0	0
15 to 16	120	75	30	0	90	45	15	0
