# Supplementary material for: Empirical single-cell tracking and cell-fate simulation reveal dual roles of p53 in tumor suppression
Source: eLife. 2022 Sep 20;11:e72498. doi: 10.7554/eLife.72498 (PMC9560164; doi:10.7554/eLife.72498)
Supplement: Figure 4—source data 1. — Data used in Figure 4. [file elife-72498-fig4-data1.xlsx]

## Sheet: Counting (a-b)
Control		No of cells	No of MD	No of CD		MD/cell	CD/cell		MD Ordinary one-way ANOA
	Video1	426	3	3		0.704225	0.704225		Tukey's multiple comparisons test	Summary	Adjusted P Value
		409	2	2		0.488998	0.488998		Control vs. MNNG1	ns	>0.9999
		418	1	3		0.239234	0.717703		Control vs. MNNG3	ns	0.9951
		455	3	4		0.659341	0.879121		Control vs. MNNG7	ns	0.3267
	Video2	470	7	6		1.48936	1.2766		Control vs. p53 RNAi	****	<0.0001
		532	4	4		0.75188	0.75188		Control vs. p53 RNAi-MNNG1	***	0.0003
		487	2	8		0.410678	1.64271		Control vs. p53 RNAi-MNNG3	*	0.0129
		486	6	7		1.23457	1.44033		Control vs. p53 RNAi-MNNG7	ns	0.6297
	video3	423	8	6		1.89125	1.41844		MNNG1 vs. MNNG3	ns	0.9998
		574	4	11		0.696864	1.91638		MNNG1 vs. MNNG7	ns	0.5194
		358	3	5		0.837989	1.39665		MNNG1 vs. p53 RNAi	****	<0.0001
		480	4	8		0.833333	1.66667		MNNG1 vs. p53 RNAi-MNNG1	***	0.0001
									MNNG1 vs. p53 RNAi-MNNG3	**	0.0048
MNNG1		No of cells	No of MD	No of CD		MD/cell	CD/cell		MNNG1 vs. p53 RNAi-MNNG7	ns	0.4251
	Video1	325	4	1		1.23077	0.307692		MNNG3 vs. MNNG7	ns	0.7998
		356	3	1		0.842697	0.280899		MNNG3 vs. p53 RNAi	****	<0.0001
		311	0	5		0	1.60772		MNNG3 vs. p53 RNAi-MNNG1	****	<0.0001
		396	2	2		0.505051	0.505051		MNNG3 vs. p53 RNAi-MNNG3	**	0.001
	Video2	614	5	4		0.814332	0.651466		MNNG3 vs. p53 RNAi-MNNG7	ns	0.1933
		663	2	7		0.301659	1.05581		MNNG7 vs. p53 RNAi	****	<0.0001
		639	3	3		0.469484	0.469484		MNNG7 vs. p53 RNAi-MNNG1	****	<0.0001
		671	5	8		0.745156	1.19225		MNNG7 vs. p53 RNAi-MNNG3	****	<0.0001
	video3	349	2	7		0.573066	2.00573		MNNG7 vs. p53 RNAi-MNNG7	**	0.0027
		346	4	2		1.15607	0.578035		p53 RNAi vs. p53 RNAi-MNNG1	*	0.0216
		337	5	6		1.48368	1.78042		p53 RNAi vs. p53 RNAi-MNNG3	***	0.0006
		629	5	7		0.794913	1.11288		p53 RNAi vs. p53 RNAi-MNNG7	****	<0.0001
									p53 RNAi-MNNG1 vs. p53 RNAi-MNNG3	ns	0.966
MNNG3		No of cells	No of MD	No of CD		MD/cell	CD/cell		p53 RNAi-MNNG1 vs. p53 RNAi-MNNG7	ns	0.1009
	Video1	471	5	6		1.06157	1.27389		p53 RNAi-MNNG3 vs. p53 RNAi-MNNG7	ns	0.6323
		531	1	11		0.188324	2.07156
		383	3	4		0.78329	1.04439		CD Ordinary one-way ANOA
		500	3	6		0.6	1.2		Tukey's multiple comparisons test	Summary	Adjusted P Value
	Video2	679	1	11		0.147275	1.62003		Control vs. MNNG1	ns	>0.9999
		687	6	10		0.873362	1.4556		Control vs. MNNG3	ns	>0.9999
		698	2	9		0.286533	1.2894		Control vs. MNNG7	***	0.0009
		773	4	7		0.517464	0.905563		Control vs. p53 RNAi	****	<0.0001
	video3	396	3	5		0.757576	1.26263		Control vs. p53 RNAi-MNNG1	*	0.0285
		342	2	1		0.584795	0.292398		Control vs. p53 RNAi-MNNG3	ns	0.0547
		562	2	19		0.355872	3.38078		Control vs. p53 RNAi-MNNG7	***	0.0004
		460	4	13		0.869565	2.82609		MNNG1 vs. MNNG3	ns	0.9986
									MNNG1 vs. MNNG7	***	0.0004
MNNG7		No of cells	No of MD	No of CD		MD/cell	CD/cell		MNNG1 vs. p53 RNAi	****	<0.0001
	Video1	472	0	8		0	1.69492		MNNG1 vs. p53 RNAi-MNNG1	*	0.014
		461	0	3		0	0.650759		MNNG1 vs. p53 RNAi-MNNG3	*	0.0283
		555	0	15		0	2.7027		MNNG1 vs. p53 RNAi-MNNG7	***	0.0002
		589	1	15		0.169779	2.54669		MNNG3 vs. MNNG7	**	0.0034
	Video2	468	0	41		0	8.76068		MNNG3 vs. p53 RNAi	****	<0.0001
		550	0	43		0	7.81818		MNNG3 vs. p53 RNAi-MNNG1	ns	0.0781
		528	0	50		0	9.4697		MNNG3 vs. p53 RNAi-MNNG3	ns	0.137
		600	0	46		0	7.66667		MNNG3 vs. p53 RNAi-MNNG7	**	0.0016
	video3	377	0	15		0	3.97878		MNNG7 vs. p53 RNAi	ns	0.9178
		582	0	48		0	8.24742		MNNG7 vs. p53 RNAi-MNNG1	ns	0.9651
		418	1	16		0.239234	3.82775		MNNG7 vs. p53 RNAi-MNNG3	ns	0.9018
		650	1	48		0.153846	7.38462		MNNG7 vs. p53 RNAi-MNNG7	ns	>0.9999
									p53 RNAi vs. p53 RNAi-MNNG1	ns	0.3114
p53 RNAi		No of cells	No of MD	No of CD		MD/cell	CD/cell		p53 RNAi vs. p53 RNAi-MNNG3	ns	0.1989
	Video1	376	6	16		1.59574	4.25532		p53 RNAi vs. p53 RNAi-MNNG7	ns	0.9699
		309	18	13		5.82524	4.20712		p53 RNAi-MNNG1 vs. p53 RNAi-MNNG3	ns	>0.9999
		326	7	9		2.14724	2.76074		p53 RNAi-MNNG1 vs. p53 RNAi-MNNG7	ns	0.9084
		355	11	8		3.09859	2.25352		p53 RNAi-MNNG3 vs. p53 RNAiMNNG7	ns	0.8039
	Video2	431	22	24		5.10441	5.56845
		546	16	28		2.9304	5.12821
		497	15	20		3.01811	4.02414
		582	24	32		4.12371	5.49828
	video3	323	8	37		2.47678	11.4551
		477	26	47		5.45073	9.85325
		373	21	54		5.63003	14.4772
		572	18	55		3.14685	9.61538
p53 RNAi-MNNG1		No of cells	No of MD	No of CD		MD/cell	CD/cell
	Video1	461	11	11		2.38612	2.38612
		425	9	10		2.11765	2.35294
		525	10	14		1.90476	2.66667
		422	5	13		1.18483	3.08057
	Video2	621	19	21		3.05958	3.38164
		682	13	10		1.90616	1.46628
		550	18	19		3.27273	3.45455
		759	21	15		2.7668	1.97628
	video3	317	15	25		4.73186	7.88644
		446	14	39		3.13901	8.74439
		419	9	31		2.14797	7.39857
		654	9	51		1.37615	7.79817
p53 RNAi-MNNG3		No of cells	No of MD	No of CD		MD/cell	CD/cell
	Video1	527	8	10		1.51803	1.89753
		493	6	11		1.21704	2.23124
		527	7	8		1.32827	1.51803
		433	8	10		1.84758	2.30947
	Video2	480	9	17		1.875	3.54167
		443	13	18		2.93454	4.06321
		497	10	17		2.01207	3.42052
		556	9	23		1.61871	4.13669
	video3	317	15	22		4.73186	6.94006
		446	13	28		2.9148	6.27803
		419	9	24		2.14797	5.72792
		654	9	51		1.37615	7.79817
p53 RNAi-MNNG3		No of cells	No of MD	No of CD		MD/cell	CD/cell
	Video1	422	2	19		0.473934	4.50237
		385	2	9		0.519481	2.33766
		464	5	26		1.07759	5.60345
		378	16	10		4.2328	2.6455
	Video2	480	9	18		1.875	3.75
		443	13	18		2.93454	4.06321
		449	4	51		0.890869	11.3586
		555	1	54		0.18018	9.72973
	video3	383	2	18		0.522193	4.69974
		415	12	30		2.89157	7.22892
		548	4	30		0.729927	5.47445
		545	4	32		0.733945	5.87156

## Sheet: Single-cell tracking (c-e)
	Lineage no	1	2	3	4	5	6	7	8	9	10	11	12	13	14	15	16	17	18	19	20	21	22	23	24	25	26	27	28	29	30	31	32	33	34	35	36	37	38	39	40	41	42	43	44	45	46	47	48
Control
MD		0	0	0	0	0	0	0	0	0	0	0	0	0	0	0	0	0	0	0	0	0	0	0	0	0	0	0	0	0	0	0	0	0	0	0	0	0	0	0	0	0	0	0	0	0	0	0	0
CD		0	0	0	0	0	0	0	0	0	0	0	0	0	0	0	0	0	0	0	0	0	0	0	0	0	0	0	0	0	0	0	0	0	0	0	0	0	0	0	0	0	0	0	0	0	0	0	0
CF		0	0	0	0	0	0	0	0	0	0	0	0	0	0	0	0	0	0	0	0	0	0	0	0	0	0	0	0	0	0	0	0	0	0	0	0	0	0	0	0	0	0	0	0	0	0	0	0
MNNG1
MD		0	0	0	0	0	0	0	0	0	0	0	0	0	0	0	0	0	0	0	0	0	0	0	0	0	0	0	0	0	0	0	0	0	0	0	0	0	0	0	0	0	0	0	0	0	0	0	0
CD		0	0	0	0	0	0	0	0	0	0	0	0	0	0	0	0	0	0	0	0	0	0	0	0	0	0	0	0	0	0	0	0	0	0	0	0	0	0	0	0	0	0	0	0	0	0	0	0
CF		0	0	0	0	0	0	1	0	0	0	0	0	0	0	0	0	0	0	0	0	0	0	0	0	0	0	0	0	0	0	0	0	0	0	0	0	0	0	0	0	0	0	0	0	0	0	0	0
MNNG3
MD		0	0	0	0	0	0	0	0	0	0	0	0	0	0	0	0	0	0	0	0	0	0	0	0	0	0	0	0	0	0	0	0	0	0	0	0	0	0	0	0	0	0	0	0	0	0	0	0
CD		0	0	0	0	0	0	0	0	0	0	0	0	0	0	0	0	0	0	0	0	0	0	0	0	0	0	0	0	0	0	0	0	0	0	0	0	0	0	0	0	0	0	0	0	0	0	0	0
CF		0	0	0	0	0	0	0	0	0	0	0	0	0	0	0	0	0	0	0	0	0	0	0	0	0	0	0	0	0	0	0	0	0	0	0	1	0	0	0	0	0	0	0	0	0	0	0	0
MNNG7
MD		0	0	0	0	0	0	0	0	0	0	0	0	0	0	0	0	0	0	0	0	0	0	0	0	0	0	0	0	0	0	0	0	0	0	0	0	0	0	0	0	0	0	0	0	0	0	0	0
CD		0	0	0	0	0	0	0	0	0	0	0	0	0	0	0	0	0	0	0	0	0	0	0	0	0	0	0	0	0	0	0	0	0	0	0	0	0	0	1	0	0	0	0	0	0	0	0	0
CF		0	0	0	0	0	0	0	0	0	0	0	0	0	0	0	0	0	0	0	0	0	0	0	0	0	0	0	0	0	0	0	0	0	0	0	0	0	0	0	0	0	0	0	0	0	0	0	0
p53 RNAi
MD		0	0	0	0	0	0	0	1	0	0	1	0	0	0	0	0	0	0	0	0	0	0	0	0	0	0	0	0	0	0	0	0	0	0	0	0	0	0	0	0	0	0	0	0	0	0	0	0
CD		0	0	0	0	0	0	0	0	0	0	0	0	0	0	0	0	0	0	0	0	0	0	1	1	1	0	1	1	0	2	1	0	0	0	0	1	0	0	0	0	0	0	0	0	0	0	0	0
CF		0	0	0	1	0	0	0	0	0	0	2	0	0	0	0	0	0	0	0	0	0	0	0	0	0	0	0	0	0	0	0	0	0	0	0	0	0	0	0	0	0	0	0	0	0	0	0	0
p53 RNAi-MNNG1
MD		0	0	0	0	0	0	0	0	0	0	0	0	0	1	0	0	0	0	0	0	0	0	0	0	0	0	0	0	0	0	0	0	0	0	0	0	0	0	0	0	0	0	0	0	0	0	0	0
CD		0	0	0	0	0	0	0	0	0	0	1	0	0	0	0	0	0	0	0	0	0	0	0	0	0	0	0	0	0	1	0	0	0	0	0	0	0	0	0	0	0	0	0	1	0	0	0	0
CF		0	0	0	0	0	0	0	0	0	0	0	0	0	1	0	0	0	0	0	0	0	1	0	0	0	0	0	0	0	0	0	0	1	0	0	0	0	0	0	0	0	0	0	0	0	0	0	0
p53 RNAi-MNNG3
MD		0	0	0	0	0	0	0	0	0	0	0	0	0	0	0	0	0	0	0	0	0	0	0	0	0	0	0	0	0	0	0	0	0	0	0	0	0	0	0	0	0	0	0	0	0	0	0	0
CD		0	0	0	0	2	0	0	0	0	0	0	0	0	0	0	0	0	0	0	0	0	0	0	1	0	0	0	0	0	0	0	0	0	0	0	0	0	0	0	0	0	0	0	0	0	0	2	0
CF		0	0	0	0	0	0	0	0	0	0	0	0	0	0	0	0	0	0	0	1	0	0	0	0	0	0	0	0	0	0	0	0	0	0	0	0	0	0	0	0	0	0	0	0	0	0	0	0
p53 RNAi-MNNG7
MD		0	0	0	0	0	0	0	0	0	0	0	0	0	0	0	0	0	0	0	0	0	0	0	0	0	0	0	0	0	0	0	0	0	0	0	0	0	0	0	0	0	0	0	0	0	0	0	0
CD		0	2	0	1	0	0	0	0	0	0	0	0	0	0	0	0	0	0	0	0	0	0	0	0	0	0	0	0	0	0	0	0	0	0	0	0	0	0	0	0	1	0	0	0	0	0	1	0
CF		0	0	0	0	0	0	0	0	0	0	0	0	0	0	0	0	0	0	0	0	0	0	0	0	0	0	0	0	0	0	0	0	0	0	0	0	0	0	0	0	0	0	0	0	0	0	0	0
MD Ordinary one-way ANOVA				CD Ordinary one-way ANOVA				CF Ordinary one-way ANOVA
Tukey's multiple comparisons test	Summary	Adjusted P Value		Tukey's multiple comparisons test	Summary	Adjusted P Value		Tukey's multiple comparisons test	Summary	Adjusted P Value
Control vs. MNNG1	ns	>0.9999		Control vs. MNNG1	ns	0.9999		Control vs. MNNG1	ns	0.9998
Control vs. MNNG3	ns	>0.9999		Control vs. MNNG3	ns	0.9959		Control vs. MNNG3	ns	>0.9999
Control vs. MNNG7	ns	0.9996		Control vs. MNNG7	ns	0.9999		Control vs. MNNG7	ns	>0.9999
Control vs. p53 RNAi	***	0.0003		Control vs. p53 RNAi	****	<0.0001		Control vs. p53 RNAi	**	0.0022
Control vs. p53 RNAi-MNNG1	*	0.0411		Control vs. p53 RNAi-MNNG1	**	0.001		Control vs. p53 RNAi-MNNG1	*	0.0354
Control vs. p53 RNAi-MNNG3	ns	0.0855		Control vs. p53 RNAi-MNNG3	**	0.0059		Control vs. p53 RNAi-MNNG3	ns	0.1303
Control vs. p53 RNAi-MNNG7	ns	>0.9999		Control vs. p53 RNAi-MNNG7	*	0.0166		Control vs. p53 RNAi-MNNG7	ns	0.9985
MNNG1 vs. MNNG3	ns	>0.9999		MNNG1 vs. MNNG3	ns	>0.9999		MNNG1 vs. MNNG3	ns	>0.9999
MNNG1 vs. MNNG7	ns	>0.9999		MNNG1 vs. MNNG7	ns	0.9876		MNNG1 vs. MNNG7	ns	0.9998
MNNG1 vs. p53 RNAi	****	<0.0001		MNNG1 vs. p53 RNAi	****	<0.0001		MNNG1 vs. p53 RNAi	***	0.0003
MNNG1 vs. p53 RNAi-MNNG1	*	0.0181		MNNG1 vs. p53 RNAi-MNNG1	***	0.0001		MNNG1 vs. p53 RNAi-MNNG1	**	0.0072
MNNG1 vs. p53 RNAi-MNNG3	*	0.0411		MNNG1 vs. p53 RNAi-MNNG3	**	0.001		MNNG1 vs. p53 RNAi-MNNG3	*	0.0354
MNNG1 vs. p53 RNAi-MNNG7	ns	0.9996		MNNG1 vs. p53 RNAi-MNNG7	**	0.0034		MNNG1 vs. p53 RNAi-MNNG7	ns	0.9565
MNNG3 vs. MNNG7	ns	0.9996		MNNG3 vs. MNNG7	ns	0.9386		MNNG3 vs. MNNG7	ns	>0.9999
MNNG3 vs. p53 RNAi	***	0.0003		MNNG3 vs. p53 RNAi	****	<0.0001		MNNG3 vs. p53 RNAi	**	0.0011
MNNG3 vs. p53 RNAi-MNNG1	*	0.0411		MNNG3 vs. p53 RNAi-MNNG1	****	<0.0001		MNNG3 vs. p53 RNAi-MNNG1	*	0.0215
MNNG3 vs. p53 RNAi-MNNG3	ns	0.0855		MNNG3 vs. p53 RNAi-MNNG3	***	0.0003		MNNG3 vs. p53 RNAi-MNNG3	ns	0.0873
MNNG3 vs. p53 RNAi-MNNG7	ns	>0.9999		MNNG3 vs. p53 RNAi-MNNG7	**	0.001		MNNG3 vs. p53 RNAi-MNNG7	ns	0.9938
MNNG7 vs. p53 RNAi	****	<0.0001		MNNG7 vs. p53 RNAi	****	<0.0001		MNNG7 vs. p53 RNAi	**	0.0022
MNNG7 vs. p53 RNAi-MNNG1	**	0.0074		MNNG7 vs. p53 RNAi-MNNG1	**	0.0059		MNNG7 vs. p53 RNAi-MNNG1	*	0.0354
MNNG7 vs. p53 RNAi-MNNG3	*	0.0181		MNNG7 vs. p53 RNAi-MNNG3	*	0.0269		MNNG7 vs. p53 RNAi-MNNG3	ns	0.1303
MNNG7 vs. p53 RNAi-MNNG7	ns	0.9944		MNNG7 vs. p53 RNAi-MNNG7	ns	0.065		MNNG7 vs. p53 RNAi-MNNG7	ns	0.9985
p53 RNAi vs. p53 RNAi-MNNG1	ns	0.9023		p53 RNAi vs. p53 RNAi-MNNG1	ns	0.2651		p53 RNAi vs. p53 RNAi-MNNG1	ns	0.9938
p53 RNAi vs. p53 RNAi-MNNG3	ns	0.7801		p53 RNAi vs. p53 RNAi-MNNG3	ns	0.0967		p53 RNAi vs. p53 RNAi-MNNG3	ns	0.9135
p53 RNAi vs. p53 RNAi-MNNG7	***	0.001		p53 RNAi vs. p53 RNAi-MNNG7	*	0.0424		p53 RNAi vs. p53 RNAi-MNNG7	*	0.0215
p53 RNAi-MNNG1 vs. p53 RNAi-MNNG3	ns	>0.9999		p53 RNAi-MNNG1 vs. p53 RNAi-MNNG3	ns	0.9999		p53 RNAi-MNNG1 vs. p53 RNAi-MNNG3	ns	0.9998
p53 RNAi-MNNG1 vs. p53 RNAi-MNNG7	ns	0.0855		p53 RNAi-MNNG1 vs. p53 RNAi-MNNG7	ns	0.9959		p53 RNAi-MNNG1 vs. p53 RNAi-MNNG7	ns	0.1878
p53 RNAi-MNNG3 vs. p53 RNAi-MNNG7	ns	0.1625		p53 RNAi-MNNG3 vs. p53 RNAi-MNNG7	ns	>0.9999		p53 RNAi-MNNG3 vs. p53 RNAi-MNNG7	ns	0.4505
[truncated: 287 more columns]
