# Supplementary material for: Empirical single-cell tracking and cell-fate simulation reveal dual roles of p53 in tumor suppression
Source: eLife. 2022 Sep 20;11:e72498. doi: 10.7554/eLife.72498 (PMC9560164; doi:10.7554/eLife.72498)
Supplement: Figure 5—source data 1. — Data used in Figure 5. [file elife-72498-fig5-data1.xlsx]

## Sheet: Figure 5
No of cells										Ordinary One-way ANOVA				Normalized to 100
Time min x10	No of cells				Diffrence					Contro-MNNG7				Time min x10	No of cells
	Control	p53 RNAi	Control-Silico(-)cell death	p53 RNAi-Silico(-)cell death	Control	p53 RNAi	Control-Silico(-)cell death	p53 RNAi-Silico(-)cell death		Tukey's multiple comparisons test	Summary	Adjusted P Value			Control	p53 RNAi	Control-Silico(-)cell death	p53 RNAi-Silico(-)cell death
0	335	335	335	335						Control vs. p53 RNAi	ns	0.9702		0	100	100	100	100
1	335	335	335	335	0	0	0	0		Control vs. p53 RNAi-Silico(-)cell death	ns	0.1254		1	100	100	100	100
2	335	335	335	335	0	0	0	0		Control vs. Control-Silico(-)cell death	ns	0.9881		2	100	100	100	100
3	339	336	339	336	4	1	4	1		p53 RNAi vs. p53 RNAi-Silico(-)cell death	*	0.0416		3	101.194	100.299	101.194	100.299
4	340	337	340	337	1	1	1	1		p53 RNAi vs. Control-Silico(-)cell death	ns	0.8672		4	101.493	100.597	101.493	100.597
5	340	338	340	338	0	1	0	1		p53 RNAi-Silico(-)cell death vs. Control-Silico(-)cell death	ns	0.242		5	101.493	100.896	101.493	100.896
6	341	339	341	340	1	1	1	2						6	101.791	101.194	101.791	101.493
7	341	342	342	343	0	3	1	3						7	101.791	102.09	102.09	102.388
8	342	342	343	343	1	0	1	0						8	102.09	102.09	102.388	102.388
9	344	342	345	343	2	0	2	0						9	102.687	102.09	102.985	102.388
10	345	343	346	344	1	1	1	1						10	102.985	102.388	103.284	102.687
11	345	344	346	345	0	1	0	1						11	102.985	102.687	103.284	102.985
12	346	345	347	346	1	1	1	1						12	103.284	102.985	103.582	103.284
13	346	345	347	346	0	0	0	0						13	103.284	102.985	103.582	103.284
14	346	346	347	347	0	1	0	1						14	103.284	103.284	103.582	103.582
15	346	346	347	347	0	0	0	0						15	103.284	103.284	103.582	103.582
16	346	346	347	348	0	0	0	1						16	103.284	103.284	103.582	103.881
17	347	347	348	349	1	1	1	1						17	103.582	103.582	103.881	104.179
18	349	347	350	349	2	0	2	0						18	104.179	103.582	104.478	104.179
19	351	347	352	349	2	0	2	0						19	104.776	103.582	105.075	104.179
20	353	349	354	351	2	2	2	2						20	105.373	104.179	105.672	104.776
21	356	351	357	353	3	2	3	2						21	106.269	104.776	106.567	105.373
22	356	352	357	354	0	1	0	1						22	106.269	105.075	106.567	105.672
23	356	353	357	355	0	1	0	1						23	106.269	105.373	106.567	105.97
24	359	353	360	355	3	0	3	0						24	107.164	105.373	107.463	105.97
25	359	355	360	357	0	2	0	2						25	107.164	105.97	107.463	106.567
26	361	355	362	358	2	0	2	1						26	107.761	105.97	108.06	106.866
27	361	355	362	358	0	0	0	0						27	107.761	105.97	108.06	106.866
28	361	357	362	360	0	2	0	2						28	107.761	106.567	108.06	107.463
29	361	357	362	360	0	0	0	0						29	107.761	106.567	108.06	107.463
30	361	357	362	360	0	0	0	0						30	107.761	106.567	108.06	107.463
31	362	358	363	361	1	1	1	1						31	108.06	106.866	108.358	107.761
32	362	359	363	362	0	1	0	1						32	108.06	107.164	108.358	108.06
33	362	359	363	362	0	0	0	0						33	108.06	107.164	108.358	108.06
34	362	359	363	362	0	0	0	0						34	108.06	107.164	108.358	108.06
35	364	359	365	362	2	0	2	0						35	108.657	107.164	108.955	108.06
36	368	360	369	363	4	1	4	1						36	109.851	107.463	110.149	108.358
37	369	361	370	364	1	1	1	1						37	110.149	107.761	110.448	108.657
38	370	362	371	365	1	1	1	1						38	110.448	108.06	110.746	108.955
39	371	364	372	367	1	2	1	2						39	110.746	108.657	111.045	109.552
40	372	364	373	367	1	0	1	0						40	111.045	108.657	111.343	109.552
41	372	365	373	368	0	1	0	1						41	111.045	108.955	111.343	109.851
42	373	366	374	369	1	1	1	1						42	111.343	109.254	111.642	110.149
43	374	368	375	371	1	2	1	2						43	111.642	109.851	111.94	110.746
44	375	368	376	371	1	0	1	0						44	111.94	109.851	112.239	110.746
45	377	368	378	371	2	0	2	0						45	112.537	109.851	112.836	110.746
46	379	368	380	372	2	0	2	1						46	113.134	109.851	113.433	111.045
47	381	368	382	372	2	0	2	0						47	113.731	109.851	114.03	111.045
48	383	368	384	372	2	0	2	0						48	114.328	109.851	114.627	111.045
49	385	372	386	376	2	4	2	4						49	114.925	111.045	115.224	112.239
50	385	372	386	376	0	0	0	0						50	114.925	111.045	115.224	112.239
51	386	373	387	377	1	1	1	1						51	115.224	111.343	115.522	112.537
52	388	376	389	380	2	3	2	3						52	115.821	112.239	116.119	113.433
53	389	377	390	381	1	1	1	1						53	116.119	112.537	116.418	113.731
54	391	378	392	382	2	1	2	1						54	116.716	112.836	117.015	114.03
55	391	379	392	383	0	1	0	1						55	116.716	113.134	117.015	114.328
56	393	381	394	385	2	2	2	2						56	117.313	113.731	117.612	114.925
57	393	382	394	386	0	1	0	1						57	117.313	114.03	117.612	115.224
58	395	386	396	390	2	4	2	4						58	117.91	115.224	118.209	116.418
59	396	387	397	391	1	1	1	1						59	118.209	115.522	118.507	116.716
60	396	388	397	392	0	1	0	1						60	118.209	115.821	118.507	117.015
61	397	391	398	395	1	3	1	3						61	118.507	116.716	118.806	117.91
62	399	392	400	396	2	1	2	1						62	119.104	117.015	119.403	118.209
63	400	392	401	396	1	0	1	0						63	119.403	117.015	119.701	118.209
64	402	395	403	399	2	3	2	3						64	120	117.91	120.299	119.104
65	403	396	404	400	1	1	1	1						65	120.299	118.209	120.597	119.403
66	405	399	406	403	2	3	2	3						66	120.896	119.104	121.194	120.299
67	408	399	409	403	3	0	3	0						67	121.791	119.104	122.09	120.299
68	412	401	413	405	4	2	4	2						68	122.985	119.701	123.284	120.896
69	412	402	413	406	0	1	0	1						69	122.985	120	123.284	121.194
70	412	405	413	409	0	3	0	3						70	122.985	120.896	123.284	122.09
71	412	405	413	409	0	0	0	0						71	122.985	120.896	123.284	122.09
72	414	406	415	410	2	1	2	1						72	123.582	121.194	123.881	122.388
73	416	407	417	411	2	1	2	1						73	124.179	121.493	124.478	122.687
74	417	409	418	413	1	2	1	2						74	124.478	122.09	124.776	123.284
75	417	411	418	415	0	2	0	2						75	124.478	122.687	124.776	123.881
76	419	410	420	415	2	-1	2	0						76	125.075	122.388	125.373	123.881
77	419	412	420	417	0	2	0	2						77	125.075	122.985	125.373	124.478
78	420	413	421	418	1	1	1	1						78	125.373	123.284	125.672	124.776
79	420	413	421	418	0	0	0	0						79	125.373	123.284	125.672	124.776
80	421	412	422	418	1	-1	1	0						80	125.672	122.985	125.97	124.776
81	422	412	423	419	1	0	1	1						81	125.97	122.985	126.269	125.075
82	422	413	423	420	0	1	0	1						82	125.97	123.284	126.269	125.373
83	423	414	424	421	1	1	1	1						83	126.269	123.582	126.567	125.672
84	424	415	425	423	1	1	1	2						84	126.567	123.881	126.866	126.269
85	425	418	426	426	1	3	1	3						85	126.866	124.776	127.164	127.164
86	425	418	426	426	0	0	0	0						86	126.866	124.776	127.164	127.164
87	427	419	428	427	2	1	2	1						87	127.463	125.075	127.761	127.463
88	429	422	430	430	2	3	2	3						88	128.06	125.97	128.358	128.358
89	429	423	430	431	0	1	0	1						89	128.06	126.269	128.358	128.657
90	429	424	430	432	0	1	0	1						90	128.06	126.567	128.358	128.955
91	431	425	432	433	2	1	2	1						91	128.657	126.866	128.955	129.254
92	431	426	432	434	0	1	0	1						92	128.657	127.164	128.955	129.552
93	430	426	432	434	-1	0	0	0						93	128.358	127.164	128.955	129.552
94	431	427	433	435	1	1	1	1						94	128.657	127.463	129.254	129.851
95	433	428	435	436	2	1	2	1						95	129.254	127.761	129.851	130.149
96	435	428	437	437	2	0	2	1						96	129.851	127.761	130.448	130.448
97	436	430	438	439	1	2	1	2						97	130.149	128.358	130.746	131.045
98	438	430	440	440	2	0	2	1						98	130.746	128.358	131.343	131.343
99	439	430	441	440	1	0	1	0						99	131.045	128.358	131.642	131.343
100	439	429	441	440	0	-1	0	0						100	131.045	128.06	131.642	131.343
101	440	432	443	443	1	3	2	3						101	131.343	128.955	132.239	132.239
102	440	434	443	445	0	2	0	2						102	131.343	129.552	132.239	132.836
103	442	436	445	447	2	2	2	2						103	131.94	130.149	132.836	133.433
104	445	437	448	448	3	1	3	1						104	132.836	130.448	133.731	133.731
105	445	439	448	450	0	2	0	2						105	132.836	131.045	133.731	134.328
106	447	440	450	451	2	1	2	1						106	133.433	131.343	134.328	134.627
107	449	441	452	452	2	1	2	1						107	134.03	131.642	134.925	134.925
108	450	443	453	454	1	2	1	2						108	134.328	132.239	135.224	135.522
109	450	444	453	455	0	1	0	1						109	134.328	132.537	135.224	135.821
110	450	447	453	458	0	3	0	3						110	134.328	133.433	135.224	136.716
111	450	448	453	459	0	1	0	1						111	134.328	133.731	135.224	137.015
112	450	451	453	462	0	3	0	3						112	134.328	134.627	135.224	137.91
113	452	452	455	463	2	1	2	1						113	134.925	134.925	135.821	138.209
114	452	454	455	466	0	2	0	3						114	134.925	135.522	135.821	139.104
115	454	455	457	469	2	1	2	3						115	135.522	135.821	136.418	140
116	454	457	457	472	0	2	0	3						116	135.522	136.418	136.418	140.896
117	458	460	461	475	4	3	4	3						117	136.716	137.313	137.612	141.791
118	460	459	463	476	2	-1	2	1						118	137.313	137.015	138.209	142.09
119	465	462	468	479	5	3	5	3						119	138.806	137.91	139.701	142.985
120	467	462	468	479	2	0	0	0						120	139.403	137.91	139.701	142.985
121	468	466	469	483	1	4	1	4						121	139.701	139.104	140	144.179
122	469	466	470	483	1	0	1	0						122	140	139.104	140.299	144.179
123	471	469	472	486	2	3	2	3						123	140.597	140	140.896	145.075
124	473	470	474	488	2	1	2	2						124	141.194	140.299	141.493	145.672
125	475	470	476	488	2	0	2	0						125	141.791	140.299	142.09	145.672
126	478	471	479	490	3	1	3	2						126	142.687	140.597	142.985	146.269
127	479	473	481	492	1	2	2	2						127	142.985	141.194	143.582	146.866
128	481	475	483	494	2	2	2	2						128	143.582	141.791	144.179	147.463
129	484	476	486	495	3	1	3	1						129	144.478	142.09	145.075	147.761
130	488	478	490	497	4	2	4	2						130	145.672	142.687	146.269	148.358
131	491	479	493	500	3	1	3	3						131	146.567	142.985	147.164	149.254
132	493	481	495	502	2	2	2	2						132	147.164	143.582	147.761	149.851
133	497	484	499	505	4	3	4	3						133	148.358	144.478	148.955	150.746
134	499	486	501	507	2	2	2	2						134	148.955	145.075	149.552	151.343
135	501	490	503	511	2	4	2	4						135	149.552	146.269	150.149	152.537
136	501	491	503	513	0	1	0	2						136	149.552	146.567	150.149	153.134
137	502	492	504	514	1	1	1	1						137	149.851	146.866	150.448	153.433
138	504	494	506	516	2	2	2	2						138	150.448	147.463	151.045	154.03
139	504	495	507	517	0	1	1	1						139	150.448	147.761	151.343	154.328
140	506	496	509	519	2	1	2	2						140	151.045	148.06	151.94	154.925
141	508	497	511	520	2	1	2	1						141	151.642	148.358	152.537	155.224
142	511	499	514	522	3	2	3	2						142	152.537	148.955	153.433	155.821
143	512	501	515	524	1	2	1	2						143	152.836	149.552	153.731	156.418
144	513	504	516	527	1	3	1	3						144	153.134	150.448	154.03	157.313
145	513	504	516	527	0	0	0	0						145	153.134	150.448	154.03	157.313
146	515	506	518	531	2	2	2	4						146	153.731	151.045	154.627	158.507
147	517	509	520	534	2	3	2	3						147	154.328	151.94	155.224	159.403
148	517	512	520	537	0	3	0	3						148	154.328	152.836	155.224	160.299
149	519	515	522	540	2	3	2	3						149	154.925	153.731	155.821	161.194
150	521	518	524	544	2	3	2	4						150	155.522	154.627	156.418	162.388
151	522	520	525	547	1	2	1	3						151	155.821	155.224	156.716	163.284
152	526	522	529	549	4	2	4	2						152	157.015	155.821	157.91	163.881
153	527	523	530	551	1	1	1	2						153	157.313	156.119	158.209	164.478
154	533	524	536	552	6	1	6	1						154	159.104	156.418	160	164.776
155	537	523	540	552	4	-1	4	0						155	160.299	156.119	161.194	164.776
156	537	526	540	555	0	3	0	3						156	160.299	157.015	161.194	165.672
157	538	527	542	557	1	1	2	2						157	160.597	157.313	161.791	166.269
158	541	524	545	557	3	-3	3	0						158	161.493	156.418	162.687	166.269
159	545	528	549	561	4	4	4	4						159	162.687	157.612	163.881	167.463
160	550	528	554	562	5	0	5	1						160	164.179	157.612	165.373	167.761
161	551	529	555	563	1	1	1	1						161	164.478	157.91	165.672	168.06
162	551	530	555	564	0	1	0	1						162	164.478	158.209	165.672	168.358
163	552	533	557	567	1	3	2	3						163	164.776	159.104	166.269	169.254
164	552	535	557	569	0	2	0	2						164	164.776	159.701	166.269	169.851
165	555	536	560	571	3	1	3	2						165	165.672	160	167.164	170.448
166	560	539	565	574	5	3	5	3						166	167.164	160.896	168.657	171.343
167	561	543	566	578	1	4	1	4						167	167.463	162.09	168.955	172.537
168	562	545	567	580	1	2	1	2						168	167.761	162.687	169.254	173.134
169	564	546	569	581	2	1	2	1						169	168.358	162.985	169.851	173.433
170	568	547	573	582	4	1	4	1						170	169.552	163.284	171.045	173.731
171	569	550	574	586	1	3	1	4						171	169.851	164.179	171.343	174.925
172	569	556	574	592	0	6	0	6						172	169.851	165.97	171.343	176.716
173	569	556	574	592	0	0	0	0						173	169.851	165.97	171.343	176.716
174	569	555	574	593	0	-1	0	1						174	169.851	165.672	171.343	177.015
175	571	556	576	594	2	1	2	1						175	170.448	165.97	171.94	177.313
176	573	559	578	597	2	3	2	3						176	171.045	166.866	172.537	178.209
177	574	563	579	601	1	4	1	4						177	171.343	168.06	172.836	179.403
178	575	565	580	603	1	2	1	2						178	171.642	168.657	173.134	180
179	576	567	581	605	1	2	1	2						179	171.94	169.254	173.433	180.597
180	577	569	582	607	1	2	1	2						180	172.239	169.851	173.731	181.194
181	582	570	587	608	5	1	5	1						181	173.731	170.149	175.224	181.493
182	584	573	589	611	2	3	2	3						182	174.328	171.045	175.821	182.388
183	585	575	590	613	1	2	1	2						183	174.627	171.642	176.119	182.985
184	587	576	592	614	2	1	2	1						184	175.224	171.94	176.716	183.284
185	591	576	596	614	4	0	4	0						185	176.418	171.94	177.91	183.284
186	593	576	598	614	2	0	2	0						186	177.015	171.94	178.507	183.284
187	594	578	599	616	1	2	1	2						187	177.313	172.537	178.806	183.881
188	597	579	602	617	3	1	3	1						188	178.209	172.836	179.701	184.179
189	598	580	603	618	1	1	1	1						189	178.507	173.134	180	184.478
190	601	581	606	620	3	1	3	2						190	179.403	173.433	180.896	185.075
191	601	581	606	620	0	0	0	0						191	179.403	173.433	180.896	185.075
192	601	582	606	621	0	1	0	1						192	179.403	173.731	180.896	185.373
193	604	584	609	623	3	2	3	2						193	180.299	174.328	181.791	185.97
194	606	584	611	624	2	0	2	1						194	180.896	174.328	182.388	186.269
195	607	584	615	624	1	0	4	0						195	181.194	174.328	183.582	186.269
196	608	585	614	625	1	1	-1	1						196	181.493	174.627	183.284	186.567
197	612	587	618	627	4	2	4	2						197	182.687	175.224	184.478	187.164
198	612	589	618	632	0	2	0	5						198	182.687	175.821	184.478	188.657
199	612	589	618	630	0	0	0	-2						199	182.687	175.821	184.478	188.06
200	616	586	622	630	4	-3	4	0						200	183.881	174.925	185.672	188.06
201	617	588	623	632	1	2	1	2						201	184.179	175.522	185.97	188.657
202	619	587	625	632	2	-1	2	0						202	184.776	175.224	186.567	188.657
203	620	588	626	634	1	1	1	2						203	185.075	175.522	186.866	189.254
204	622	588	628	635	2	0	2	1						204	185.672	175.522	187.463	189.552
205	625	588	631	636	3	0	3	1						205	186.567	175.522	188.358	189.851
206	626	589	632	637	1	1	1	1						206	186.866	175.821	188.657	190.149
207	628	591	634	639	2	2	2	2						207	187.463	176.418	189.254	190.746
208	629	593	635	645	1	2	1	6						208	187.761	177.015	189.552	192.537
209	630	595	636	645	1	2	1	0						209	188.06	177.612	189.851	192.537
210	631	596	637	646	1	1	1	1						210	188.358	177.91	190.149	192.836
211	631	596	637	648	0	0	0	2						211	188.358	177.91	190.149	193.433
212	631	595	637	648	0	-1	0	0						212	188.358	177.612	190.149	193.433
213	633	598	639	651	2	3	2	3						213	188.955	178.507	190.746	194.328
214	635	600	641	653	2	2	2	2						214	189.552	179.104	191.343	194.925
215	636	601	642	654	1	1	1	1						215	189.851	179.403	191.642	195.224
216	637	602	643	655	1	1	1	1						216	190.149	179.701	191.94	195.522
217	640	604	646	657	3	2	3	2						217	191.045	180.299	192.836	196.119
218	641	605	647	661	1	1	1	4						218	191.343	180.597	193.134	197.313
219	642	604	648	659	1	-1	1	-2						219	191.642	180.299	193.433	196.716
220	644	606	650	661	2	2	2	2						220	192.239	180.896	194.03	197.313
221	647	608	653	663	3	2	3	2						221	193.134	181.493	194.925	197.91
222	650	609	656	664	3	1	3	1						222	194.03	181.791	195.821	198.209
223	653	609	659	664	3	0	3	0						223	194.925	181.791	196.716	198.209
224	656	610	662	665	3	1	3	1						224	195.821	182.09	197.612	198.507
225	659	610	665	665	3	0	3	0						225	196.716	182.09	198.507	198.507
226	660	610	667	665	1	0	2	0						226	197.015	182.09	199.104	198.507
227	662	611	669	666	2	1	2	1						227	197.612	182.388	199.701	198.806
228	666	612	673	667	4	1	4	1						228	198.806	182.687	200.896	199.104
229	667	614	674	669	1	2	1	2						229	199.104	183.284	201.194	199.701
230	670	614	677	669	3	0	3	0						230	200	183.284	202.09	199.701
231	673	616	680	671	3	2	3	2						231	200.896	183.881	202.985	200.299
232	676	617	683	672	3	1	3	1						232	201.791	184.179	203.881	200.597
233	678	618	685	673	2	1	2	1						233	202.388	184.478	204.478	200.896
234	680	619	687	674	2	1	2	1						234	202.985	184.776	205.075	201.194
235	681	622	688	677	1	3	1	3						235	203.284	185.672	205.373	202.09
236	683	629	690	684	2	7	2	7						236	203.881	187.761	205.97	204.179
237	684	633	691	688	1	4	1	4						237	204.179	188.955	206.269	205.373
238	685	634	692	692	1	1	1	4						238	204.478	189.254	206.567	206.567
239	687	633	694	690	2	-1	2	-2						239	205.075	188.955	207.164	205.97
240	689	633	696	690	2	0	2	0						240	205.672	188.955	207.761	205.97
241	692	633	699	691	3	0	3	1						241	206.567	188.955	208.657	206.269
242	696	633	703	691	4	0	4	0						242	207.761	188.955	209.851	206.269
243	697	640	704	698	1	7	1	7						243	208.06	191.045	210.149	208.358
244	698	640	705	699	1	0	1	1						244	208.358	191.045	210.448	208.657
245	700	641	707	700	2	1	2	1						245	208.955	191.343	211.045	208.955
246	701	641	708	700	1	0	1	0						246	209.254	191.343	211.343	208.955
247	704	640	711	700	3	-1	3	0						247	210.149	191.045	212.239	208.955
248	705	641	712	701	1	1	1	1						248	210.448	191.343	212.537	209.254
249	707	643	714	703	2	2	2	2						249	211.045	191.94	213.134	209.851
250	714	643	721	703	7	0	7	0						250	213.134	191.94	215.224	209.851
251	717	646	724	706	3	3	3	3						251	214.03	192.836	216.119	210.746
252	720	645	727	706	3	-1	3	0						252	214.925	192.537	217.015	210.746
253	721	646	728	708	1	1	1	2						253	215.224	192.836	217.313	211.343
254	722	646	729	708	1	0	1	0						254	215.522	192.836	217.612	211.343
255	725	646	732	709	3	0	3	1						255	216.418	192.836	218.507	211.642
256	728	646	735	710	3	0	3	1						256	217.313	192.836	219.403	211.94
257	732	651	739	715	4	5	4	5						257	218.507	194.328	220.597	213.433
258	736	651	743	715	4	0	4	0						258	219.701	194.328	221.791	213.433
259	738	650	745	715	2	-1	2	0						259	220.299	194.03	222.388	213.433
260	740	650	747	715	2	0	2	0						260	220.896	194.03	222.985	213.433
261	743	651	750	716	3	1	3	1						261	221.791	194.328	223.881	213.731
262	745	653	752	718	2	2	2	2						262	222.388	194.925	224.478	214.328
263	746	656	753	721	1	3	1	3						263	222.687	195.821	224.776	215.224
264	749	659	756	724	3	3	3	3						264	223.582	196.716	225.672	216.119
265	749	661	756	726	0	2	0	2						265	223.582	197.313	225.672	216.716
266	752	664	759	729	3	3	3	3						266	224.478	198.209	226.567	217.612
267	756	670	763	735	4	6	4	6						267	225.672	200	227.761	219.403
268	756	673	763	741	0	3	0	6						268	225.672	200.896	227.761	221.194
269	758	676	765	742	2	3	2	1						269	226.269	201.791	228.358	221.493
270	760	678	767	745	2	2	2	3						270	226.866	202.388	228.955	222.388
271	763	679	770	746	3	1	3	1						271	227.761	202.687	229.851	222.687
272	763	683	770	753	0	4	0	7						272	227.761	203.881	229.851	224.776
273	765	685	772	756	2	2	2	3						273	228.358	204.478	230.448	225.672
274	768	688	775	757	3	3	3	1						274	229.254	205.373	231.343	225.97
275	771	690	778	759	3	2	3	2						275	230.149	205.97	232.239	226.567
276	773	691	780	763	2	1	2	4						276	230.746	206.269	232.836	227.761
277	774	691	781	761	1	0	1	-2						277	231.045	206.269	233.134	227.164
278	775	693	782	763	1	2	1	2						278	231.343	206.866	233.433	227.761
279	777	695	785	765	2	2	3	2						279	231.94	207.463	234.328	228.358
280	777	695	785	765	0	0	0	0						280	231.94	207.463	234.328	228.358
281	779	698	790	768	2	3	5	3						281	232.537	208.358	235.821	229.254
282	781	702	790	772	2	4	0	4						282	233.134	209.552	235.821	230.448
283	782	702	791	773	1	0	1	1						283	233.433	209.552	236.119	230.746
284	783	702	792	775	1	0	1	2						284	233.731	209.552	236.418	231.343
285	785	705	794	778	2	3	2	3						285	234.328	210.448	237.015	232.239
286	787	711	796	784	2	6	2	6						286	234.925	212.239	237.612	234.03
287	789	712	798	785	2	1	2	1						287	235.522	212.537	238.209	234.328
288	789	714	799	790	0	2	1	5						288	235.522	213.134	238.507	235.821
289	791	716	804	790	2	2	5	0						289	236.119	213.731	240	235.821
290	793	720	804	797	2	4	0	7						290	236.716	214.925	240	237.91
291	795	722	806	797	2	2	2	0						291	237.313	215.522	240.597	237.91
292	796	723	807	801	1	1	1	4						292	237.612	215.821	240.896	239.104
293	799	724	810	800	3	1	3	-1						293	238.507	216.119	241.791	238.806
294	800	726	811	802	1	2	1	2						294	238.806	216.716	242.09	239.403
295	800	729	811	805	0	3	0	3						295	238.806	217.612	242.09	240.299
296	805	731	816	807	5	2	5	2						296	240.299	218.209	243.582	240.896
297	806	734	817	810	1	3	1	3						297	240.597	219.104	243.881	241.791
298	809	739	820	815	3	5	3	5						298	241.493	220.597	244.776	243.284
299	811	745	822	821	2	6	2	6						299	242.09	222.388	245.373	245.075
300	815	749	826	825	4	4	4	4						300	243.284	223.582	246.567	246.269
301	817	752	828	828	2	3	2	3						301	243.881	224.478	247.164	247.164
302	821	754	832	830	4	2	4	2						302	245.075	225.075	248.358	247.761
303	824	757	835	834	3	3	3	4						303	245.97	225.97	249.254	248.955
304	826	757	837	834	2	0	2	0						304	246.567	225.97	249.851	248.955
305	829	762	840	839	3	5	3	5						305	247.463	227.463	250.746	250.448
306	834	765	842	846	5	3	2	7						306	248.955	228.358	251.343	252.537
307	835	767	843	853	1	2	1	7						307	249.254	228.955	251.642	254.627
308	836	770	847	855	1	3	4	2						308	249.552	229.851	252.836	255.224
309	837	771	846	855	1	1	-1	0						309	249.851	230.149	252.537	255.224
310	838	773	847	863	1	2	1	8						310	250.149	230.746	252.836	257.612
311	843	774	852	860	5	1	5	-3						311	251.642	231.045	254.328	256.716
312	846	777	856	863	3	3	4	3						312	252.537	231.94	255.522	257.612
313	849	778	859	864	3	1	3	1						313	253.433	232.239	256.418	257.91
314	850	781	860	867	1	3	1	3						314	253.731	233.134	256.716	258.806
315	852	784	862	870	2	3	2	3						315	254.328	234.03	257.313	259.701
316	853	786	863	875	1	2	1	5						316	254.627	234.627	257.612	261.194
317	853	790	863	877	0	4	0	2						317	254.627	235.821	257.612	261.791
318	856	793	866	883	3	3	3	6						318	255.522	236.716	258.507	263.582
319	859	797	869	885	3	4	3	2						319	256.418	237.91	259.403	264.179
320	865	796	875	885	6	-1	6	0						320	258.209	237.612	261.194	264.179
321	866	797	876	887	1	1	1	2						321	258.507	237.91	261.493	264.776
322	867	799	877	889	1	2	1	2						322	258.806	238.507	261.791	265.373
323	871	802	881	898	4	3	4	9						323	260	239.403	262.985	268.06
324	872	804	882	896	1	2	1	-2						324	260.299	240	263.284	267.463
325	876	807	886	899	4	3	4	3						325	261.493	240.896	264.478	268.358
326	880	807	890	899	4	0	4	0						326	262.687	240.896	265.672	268.358
327	881	811	894	903	1	4	4	4						327	262.985	242.09	266.866	269.552
328	885	814	896	909	4	3	2	6						328	264.179	242.985	267.463	271.343
329	887	815	898	908	2	1	2	-1						329	264.776	243.284	268.06	271.045
330	891	818	902	911	4	3	4	3						330	265.97	244.179	269.254	271.94
331	892	820	903	913	1	2	1	2						331	266.269	244.776	269.552	272.537
332	896	822	907	918	4	2	4	5						332	267.463	245.373	270.746	274.03
333	898	826	909	920	2	4	2	2						333	268.06	246.567	271.343	274.627
334	899	827	910	921	1	1	1	1						334	268.358	246.866	271.642	274.925
335	900	829	911	923	1	2	1	2						335	268.657	247.463	271.94	275.522
336	903	831	914	925	3	2	3	2						336	269.552	248.06	272.836	276.119
337	906	833	917	927	3	2	3	2						337	270.448	248.657	273.731	276.716
338	907	836	918	936	1	3	1	9						338	270.746	249.552	274.03	279.403
339	910	839	921	935	3	3	3	-1						339	271.642	250.448	274.925	279.104
340	911	841	922	938	1	2	1	3						340	271.94	251.045	275.224	280
341	913	844	924	941	2	3	2	3						341	272.537	251.94	275.821	280.896
342	917	846	928	946	4	2	4	5						342	273.731	252.537	277.015	282.388
343	918	849	929	950	1	3	1	4						343	274.03	253.433	277.313	283.582
344	922	851	933	950	4	2	4	0						344	275.224	254.03	278.507	283.582
345	925	851	939	953	3	0	6	3						345	276.119	254.03	280.299	284.478
346	926	854	938	954	1	3	-1	1						346	276.418	254.925	280	284.776
347	927	857	939	960	1	3	1	6						347	276.716	255.821	280.299	286.567
348	929	864	941	965	2	7	2	5						348	277.313	257.91	280.896	288.06
349	930	867	942	972	1	3	1	7						349	277.612	258.806	281.194	290.149
350	930	873	942	985	0	6	0	13						350	277.612	260.597	281.194	294.03
351	930	875	945	981	0	2	3	-4						351	277.612	261.194	282.09	292.836
352	935	875	948	984	5	0	3	3						352	279.104	261.194	282.985	293.731
353	936	876	949	983	1	1	1	-1						353	279.403	261.493	283.284	293.433
354	940	878	953	985	4	2	4	2						354	280.597	262.09	284.478	294.03
355	943	880	956	987	3	2	3	2						355	281.493	262.687	285.373	294.627
356	943	882	957	989	0	2	1	2						356	281.493	263.284	285.672	295.224
357	944	884	958	994	1	2	1	5						357	281.791	263.881	285.97	296.716
358	947	888	961	996	3	4	3	2						358	282.687	265.075	286.866	297.313
359	950	894	964	1002	3	6	3	6						359	283.582	266.866	287.761	299.104
360	953	901	967	1009	3	7	3	7						360	284.478	268.955	288.657	301.194
361	955	905	969	1013	2	4	2	4						361	285.075	270.149	289.254	302.388
362	960	912	974	1020	5	7	5	7						362	286.567	272.239	290.746	304.478
363	963	918	977	1029	3	6	3	9						363	287.463	274.03	291.642	307.164
364	965	921	979	1030	2	3	2	1						364	288.06	274.925	292.239	307.463
365	965	922	979	1031	0	1	0	1						365	288.06	275.224	292.239	307.761
366	967	929	981	1044	2	7	2	13						366	288.657	277.313	292.836	311.642
367	971	932	985	1043	4	3	4	-1						367	289.851	278.209	294.03	311.343
368	976	937	990	1048	5	5	5	5						368	291.343	279.701	295.522	312.836
369	978	942	992	1053	2	5	2	5						369	291.94	281.194	296.119	314.328
370	982	946	996	1057	4	4	4	4						370	293.134	282.388	297.313	315.522
371	982	949	996	1060	0	3	0	3						371	293.134	283.284	297.313	316.418
372	986	952	1000	1063	4	3	4	3						372	294.328	284.179	298.507	317.313
373	988	955	1002	1066	2	3	2	3						373	294.925	285.075	299.104	318.209
374	993	958	1007	1069	5	3	5	3						374	296.418	285.97	300.597	319.104
375	994	958	1008	1069	1	0	1	0						375	296.716	285.97	300.896	319.104
376	996	959	1010	1070	2	1	2	1						376	297.313	286.269	301.493	319.403
377	997	962	1011	1073	1	3	1	3						377	297.612	287.164	301.791	320.299
378	1001	963	1015	1075	4	1	4	2						378	298.806	287.463	302.985	320.896
379	1004	968	1018	1080	3	5	3	5						379	299.701	288.955	303.881	322.388
380	1006	972	1020	1084	2	4	2	4						380	300.299	290.149	304.478	323.582
381	1006	974	1020	1086	0	2	0	2						381	300.299	290.746	304.478	324.179
382	1008	977	1022	1093	2	3	2	7						382	300.896	291.642	305.075	326.269
383	1013	980	1033	1094	5	3	11	1						383	302.388	292.537	308.358	326.567
384	1016	983	1032	1097	3	3	-1	3						384	303.284	293.433	308.06	327.463
385	1018	985	1034	1099	2	2	2	2						385	303.881	294.03	308.657	328.06
386	1020	988	1036	1105	2	3	2	6						386	304.478	294.925	309.254	329.851
387	1022	988	1038	1104	2	0	2	-1						387	305.075	294.925	309.851	329.552
388	1024	990	1040	1106	2	2	2	2						388	305.672	295.522	310.448	330.149
389	1024	992	1040	1108	0	2	0	2						389	305.672	296.119	310.448	330.746
390	1025	997	1041	1119	1	5	1	11						390	305.97	297.612	310.746	334.03
391	1028	1001	1044	1119	3	4	3	0						391	306.866	298.806	311.642	334.03
392	1028	1007	1044	1134	0	6	0	15						392	306.866	300.597	311.642	338.507
393	1030	1008	1046	1129	2	1	2	-5						393	307.463	300.896	312.239	337.015
394	1033	1010	1049	1134	3	2	3	5						394	308.358	301.493	313.134	338.507
395	1037	1013	1053	1139	4	3	4	5						395	309.552	302.388	314.328	340
396	1039	1013	1055	1139	2	0	2	0						396	310.149	302.388	314.925	340
397	1039	1015	1055	1142	0	2	0	3						397	310.149	302.985	314.925	340.896
398	1040	1018	1056	1145	1	3	1	3						398	310.448	303.881	315.224	341.791
399	1041	1019	1057	1147	1	1	1	2						399	310.746	304.179	315.522	342.388
400	1048	1026	1064	1156	7	7	7	9						400	312.836	306.269	317.612	345.075
