# Supplementary material for: Empirical single-cell tracking and cell-fate simulation reveal dual roles of p53 in tumor suppression
Source: eLife. 2022 Sep 20;11:e72498. doi: 10.7554/eLife.72498 (PMC9560164; doi:10.7554/eLife.72498)
Supplement: Figure 6—source data 1. — Data used in Figure 6. [file elife-72498-fig6-data1.xlsx]

## Sheet: Figure 6
	MD: multipolar cell division
	Progeny: No. of progeny
	BD: bipolar cell division
	CF: cell fusion															Figure 6a and b							Figure 6d
Control								p53 RNAi								Percentage							Treatment	No. of MD	No. of BD	MD/BD Ratio
			Prior event		Fusion counterpart						Prior event		Fusion counterpart			Treatment	Figure 6a		Figure 6b				Control	2	720	0.277778
	MD	Progeny	CF (Pattern 1a)	BD (Pattern 1b)	Sibling (Pattern 2a)	Non-sibling (Pattern 2b)			MD	Progeny	CF (Pattern 1a)	BD (Pattern 1b)	Sibling (Pattern 2a)	Non-sibling (Pattern 2b)			Pattern 1a	Pattern 1b	Pattern 2a	Pattern 2b			MNNG1	1	782	0.127877
	1	3		1					1	4	1		1			Control	79.4	20.6	88.9	11.1			MNNG3	2	591	0.338409
	1	4	1		1				1	3	1		1			p53 RNAi	93.2	6.8	83.6	16.4			MNNG7	0	64	0
	1	3		1					1	4	1		1										p53 RNAi	19	730	2.60274
	1	3	1		1				1	3	1		1										p53 RNAi-MNNG1	14	585	2.39316
	1	3	1		1				1	3	1		1			Number of patterns/50 cell lineages							p53 RNAi-MNNG3	13	457	2.84464
	1	3		1					1	3	1		1			Treatment	Figure 6a		Figure 6b				p53 RNAi-MNNG7	3	140	2.14286
	1	3		1					1	3	1		1				Pattern 1a	Pattern 1b	Pattern 2a	Pattern 2b
	1	3	1		1				1	3	1		1			Control	0.25	0.06	0.22	0.03
	1	3	1		1				1	3	1		1			p53 RNAi	2.42	0.18	2.03	0.4
	1	3	1		1				1	3	1		1
	1	3	1		1				1	4	1		1
	1	3	1		1				1	3	1		1			Figure 6c
	1	3	1		1				1	4	1		1
	1	3	1		1				1	3	1		1			Number of viable progeny produced by multipolar cell division ( c )
	1	3	1		1				1	3	1		1			Treatment
	1	3		1					1	3		1					No of multipolar cell division found	Conversion to the No of cell lineage	Viable progeny	A	B
	1	4	1		1				1	4	1			1		Control	124	0.06	4	3.22581	6666.67
	1	3	1		1				1	3	1			1		p53 RNAi	220	0.18	8	3.63636	4444.44
	1	3	1		1				1	3	1		1
	1	3	1		1				1	3	1			1		A: % Viable progeny (MD-BD)/total no of the progeny of multipolar cell division
	1	3	1		1				1	3		1				B: Viable progeny (MD-BD)/total no of the progeny of multipolar cell division in 100 lineages
	1	3		1					1	3	1		1
	1	4	1			1			1	4	1		1
	1	4	1		1				1	3	1		1
	1	3	1		1				1	3	1		1
	1	3	1		1				1	4	1		1
	1	3	1		1				1	3	1		1
	1	3		1					1	3	1			1
	1	3	1		1				1	3	1		1
	1	3	1			1			1	4	1		1
	1	3	1			1			1	3	1		1
	1	3	1		1				1	3	1		1
	1	3	1		1				1	4	1		1
	1	4	1		1				1	3	1		1
Total	34	107	27	7	24	3			1	3	1		1
									1	3	1		1
									1	4	1		1
3 MD per 485 cell lineages (single-cell tracking data)									1	3	1			1
Thus, 0.31 MD per 50 cell lineages									1	3	1		1
									1	3	1		1
									1	3	1		1
Adjustment to 50 cell lineages									1	4	1		1
			Prior event		Fusion counterpart				1	3	1		1
	MD	Progeny	CF (Pattern 1a)	BD (Pattern 1b)	Sibling (Pattern 2a)	Non-sibling (Pattern 2b)			1	4	1			1
Total	0.31	0.976277	0.246126	0.0638104	0.218778	0.0273473			1	4	1		1
%*			79.4	20.6	88.9	11.1			1	3	1		1
									1	3	1		1
									1	3	1		1
*Pattern 1a+Pattern 1b: 100%									1	3	1			1
*Pattern 2a+Pattern 2b: 100%									1	3	1		1
									1	3	1		1
									1	3	1		1
									1	3	1		1
									1	3	1		1
									1	4	1		1
									1	3		1
									1	3	1			1
									1	3		1
									1	3	1			1
								Total	59	191	55	4	46	9
								19 MD per 335 cell lineages (single-cell tracking data)
								Thus, 2.84 MD per 50 cell lineages
								Adjustment to 50 cell lineages
											Prior event		Fusion counterpart
									MD	Progeny	CF (Pattern 1a)	BD (Pattern 1b)	Sibling (Pattern 2a)	Non-sibling (Pattern 2b)
								Total	2.84	2.83654	2.42291	0.176211	2.02643	0.396476
								%*			93.2	6.8	83.6	16.4
								*Pattern 1a+Pattern 1b: 100%
								*Pattern 2a+Pattern 2b: 100%
