# Supplementary material for: Empirical single-cell tracking and cell-fate simulation reveal dual roles of p53 in tumor suppression
Source: eLife. 2022 Sep 20;11:e72498. doi: 10.7554/eLife.72498 (PMC9560164; doi:10.7554/eLife.72498)
Supplement: Figure 8—figure supplement 1—source data 1. — Data used in Figure 8—figure supplement 1. [file elife-72498-fig8-figsupp1-data1.xlsx]

## Sheet: Figure 8-supplement 1
Operation data-Control																											Operation data-MNNG7
Time min x10	No of cells																										Time min x10	No of cells
	300	300	300	300	300	500	500	500	500	500	1000	1000	1000	1000	1000	1500	1500	1500	1500	1500	2000	2000	2000	2000	2000			300	300	300	300	300	500	500	500	500	500	1000	1000	1000	1000	1000	1500	1500	1500	1500	1500	2000	2000
0	300	300	300	300	300	500	500	500	500	500	1000	1000	1000	1000	1000	1500	1500	1500	1500	1500	2000	2000	2000	2000	2000		0	300	300	300	300	300	500	500	500	500	500	1000	1000	1000	1000	1000	1500	1500	1500	1500	1500	2000	2000
1	300	300	300	300	300	500	500	500	500	500	1000	1000	1000	1000	1000	1500	1500	1500	1500	1500	2000	2000	2000	2000	2000		1	300	300	300	300	300	500	500	500	500	500	1000	1000	1000	1000	1000	1500	1500	1500	1500	1500	2000	2000
2	300	300	300	300	300	500	500	500	500	500	1000	1000	1000	1000	1000	1500	1500	1500	1500	1500	2000	2000	2000	2000	2000		2	300	300	300	300	300	500	500	500	500	500	1000	1000	1000	1000	1000	1500	1500	1500	1500	1500	2000	2000
3	300	300	300	300	300	500	500	500	500	500	1000	1000	1000	1000	1000	1500	1500	1500	1500	1500	2000	2000	2000	2000	2000		3	300	300	300	300	300	500	500	500	500	500	1000	1000	1000	1000	1000	1500	1500	1500	1500	1500	2000	2000
4	300	299	300	300	300	500	500	500	500	500	1000	1000	1000	1000	1000	1500	1500	1500	1499	1500	2000	1998	2000	2000	1999		4	300	300	300	300	300	500	500	500	500	500	1000	1000	1000	1000	1000	1500	1500	1500	1499	1500	2000	2000
5	300	301	304	301	303	504	507	502	504	510	1007	1006	1014	1014	1004	1520	1513	1512	1513	1517	2025	2021	2030	2013	2020		5	300	301	300	300	300	500	500	500	500	500	1000	1000	1000	1001	1001	1500	1502	1500	1499	1500	2001	2000
6	301	301	307	301	303	507	509	504	506	512	1011	1006	1016	1015	1007	1522	1517	1517	1520	1521	2028	2023	2036	2018	2024		6	300	301	300	300	300	500	500	500	500	500	1000	1000	1000	1001	1001	1500	1502	1500	1499	1500	2001	1999
7	301	301	307	301	303	507	509	504	506	512	1011	1005	1016	1015	1006	1522	1517	1517	1520	1521	2028	2023	2036	2018	2024		7	300	301	300	300	300	500	500	500	500	500	1000	1000	1000	1001	1001	1500	1502	1500	1499	1500	2001	1999
8	302	303	309	301	304	509	510	505	506	513	1012	1007	1016	1020	1007	1528	1524	1520	1524	1524	2033	2027	2041	2023	2026		8	300	301	300	300	300	500	500	500	500	500	1000	1000	1000	1001	1001	1500	1502	1500	1499	1500	2001	1999
9	304	302	313	303	308	510	519	508	513	515	1020	1019	1026	1031	1015	1539	1534	1536	1541	1530	2049	2050	2070	2045	2048		9	300	301	300	300	300	500	500	500	500	500	1000	1000	1000	1001	1001	1500	1502	1500	1499	1500	2001	1999
10	306	302	315	303	310	512	520	509	513	517	1022	1020	1028	1033	1017	1544	1535	1543	1547	1533	2052	2054	2076	2050	2050		10	300	301	300	300	300	500	500	500	500	500	1000	1000	1000	1001	1001	1500	1502	1500	1499	1500	2001	1999
11	309	303	318	305	310	515	523	513	514	521	1027	1027	1036	1039	1025	1551	1540	1547	1556	1542	2065	2066	2091	2060	2062		11	300	301	300	300	300	500	500	500	500	500	1000	1000	1000	1001	1001	1500	1503	1500	1499	1500	2001	1999
12	310	303	318	305	312	516	525	514	515	522	1027	1030	1039	1040	1027	1553	1545	1551	1558	1544	2072	2070	2095	2066	2069		12	300	301	300	300	300	500	500	500	500	500	1000	1000	1000	1001	1001	1500	1503	1500	1499	1500	2001	1999
13	310	303	318	305	312	516	525	514	515	522	1027	1030	1039	1040	1027	1553	1545	1551	1558	1544	2072	2070	2095	2066	2069		13	300	301	300	300	300	500	500	500	500	500	1000	1000	1000	1001	1001	1500	1503	1500	1499	1500	2001	1999
14	312	303	319	308	315	517	526	517	516	524	1029	1036	1040	1045	1028	1555	1547	1557	1562	1545	2074	2077	2100	2074	2073		14	300	301	300	300	300	500	500	500	500	500	1000	1000	1000	1001	1001	1500	1503	1500	1499	1500	2001	1999
15	312	303	319	308	315	517	526	517	516	524	1029	1036	1040	1045	1028	1555	1547	1557	1562	1545	2074	2077	2100	2074	2073		15	300	301	300	300	300	500	500	500	500	500	1000	1000	1000	1001	1001	1500	1503	1500	1499	1500	2001	1999
16	312	303	319	308	315	517	526	517	516	524	1029	1036	1040	1045	1028	1555	1547	1557	1562	1545	2074	2077	2100	2074	2073		16	300	301	300	300	300	500	500	500	500	500	1000	1000	1000	1001	1001	1500	1503	1500	1499	1500	2001	1999
17	312	303	319	308	315	517	526	517	516	524	1029	1036	1040	1045	1028	1555	1547	1557	1562	1545	2074	2077	2100	2074	2073		17	300	301	300	300	300	500	500	500	500	500	1000	1000	1000	1001	1001	1500	1503	1500	1499	1500	2001	1999
18	312	303	319	308	315	517	526	517	516	524	1029	1036	1040	1045	1028	1555	1547	1557	1562	1545	2074	2077	2100	2074	2073		18	300	301	300	300	300	500	500	500	500	500	1000	1000	1000	1001	1001	1500	1503	1500	1499	1500	2001	1999
19	313	303	319	308	316	517	527	517	516	525	1030	1038	1042	1047	1031	1556	1550	1560	1565	1550	2081	2082	2106	2076	2076		19	300	301	300	300	300	500	500	500	500	500	1000	1000	1000	1001	1001	1500	1503	1500	1499	1500	2001	1999
20	314	305	319	309	319	518	530	518	518	527	1032	1044	1045	1049	1039	1562	1563	1567	1572	1553	2095	2090	2116	2086	2086		20	300	300	300	300	300	500	500	500	499	500	1000	1000	1000	1001	1001	1500	1503	1500	1499	1500	2001	1999
21	316	306	320	311	320	524	532	520	519	532	1042	1050	1050	1057	1043	1564	1575	1569	1581	1558	2103	2094	2123	2096	2093		21	300	300	300	300	300	500	500	500	499	500	1000	1000	1000	1001	1001	1500	1503	1500	1499	1500	2001	1999
22	318	308	320	313	321	527	533	521	523	534	1044	1056	1056	1063	1048	1568	1580	1582	1586	1564	2113	2103	2138	2105	2100		22	300	300	300	300	300	500	500	500	499	500	1000	1000	1000	1001	1001	1500	1503	1500	1499	1500	2001	1999
23	319	312	321	313	324	531	538	524	526	539	1052	1063	1059	1066	1061	1580	1595	1598	1597	1578	2125	2117	2160	2116	2110		23	300	300	300	300	300	500	500	500	499	500	1000	1000	1000	1001	1001	1500	1503	1500	1499	1500	2001	1999
24	319	312	321	313	324	531	538	524	526	539	1052	1063	1059	1066	1061	1580	1595	1598	1597	1578	2125	2117	2160	2116	2110		24	300	300	300	300	300	500	500	500	499	500	1000	1000	1000	1001	1001	1500	1503	1500	1499	1500	2001	1999
25	319	312	321	313	324	531	538	524	526	539	1052	1062	1059	1066	1061	1580	1595	1598	1597	1578	2125	2117	2158	2115	2110		25	300	300	300	300	300	500	500	500	499	500	1001	1000	1000	1001	1001	1500	1503	1500	1499	1501	2001	1999
26	321	314	324	318	326	536	543	529	528	543	1062	1067	1064	1071	1072	1588	1612	1609	1608	1583	2139	2131	2179	2139	2126		26	300	300	300	300	300	500	500	500	498	500	1001	1000	1000	1001	1001	1500	1503	1500	1499	1501	2001	1999
27	321	314	324	318	326	535	543	528	528	543	1062	1067	1064	1071	1072	1588	1612	1609	1608	1583	2139	2131	2179	2139	2125		27	300	300	300	300	300	500	500	500	498	500	1001	1000	1000	1000	1001	1500	1503	1500	1499	1501	2002	2000
28	322	314	327	319	329	538	544	529	528	544	1066	1071	1069	1076	1077	1596	1622	1620	1620	1590	2158	2140	2189	2147	2133		28	300	300	300	300	300	501	500	500	498	500	1001	1000	1000	1000	1001	1500	1503	1500	1499	1501	2002	2000
29	322	314	327	319	329	538	544	529	528	544	1066	1071	1069	1076	1077	1596	1622	1620	1620	1590	2158	2140	2189	2147	2133		29	300	300	300	300	300	501	500	500	498	500	1001	1000	1000	1000	1001	1500	1503	1500	1499	1501	2002	2000
30	322	314	327	319	329	538	544	529	528	544	1066	1071	1069	1076	1077	1596	1622	1620	1620	1590	2158	2140	2189	2147	2133		30	300	300	300	300	300	501	500	500	498	500	1001	1000	1000	1000	1001	1500	1503	1500	1499	1501	2002	2000
31	322	314	327	319	329	538	544	529	527	544	1066	1071	1069	1076	1077	1596	1622	1620	1620	1590	2158	2140	2189	2147	2133		31	301	300	300	301	300	501	500	500	498	500	1001	1000	1000	1000	1001	1500	1503	1500	1499	1501	2002	2000
32	322	314	327	319	329	538	544	529	527	544	1066	1071	1068	1076	1077	1596	1622	1620	1620	1590	2158	2140	2189	2147	2133		32	301	300	300	301	300	501	500	500	498	500	1001	1000	1000	1000	1001	1500	1503	1500	1499	1501	2002	2000
33	323	315	327	320	330	540	545	531	528	544	1070	1072	1068	1080	1080	1600	1627	1622	1626	1593	2161	2141	2192	2152	2137		33	301	300	300	301	300	501	500	500	498	500	1001	1000	1000	1000	1001	1500	1503	1500	1499	1501	2002	2000
34	323	315	327	320	330	540	545	531	528	544	1070	1072	1068	1080	1080	1600	1627	1622	1626	1593	2161	2141	2192	2152	2137		34	301	300	300	301	300	501	500	500	498	500	1001	1000	1000	1000	1001	1500	1503	1500	1499	1501	2002	2000
35	323	315	327	320	330	540	545	531	528	544	1070	1072	1068	1080	1080	1600	1627	1622	1626	1593	2161	2141	2192	2152	2137		35	301	300	300	301	300	501	500	500	498	500	1001	1000	1000	1000	1001	1501	1504	1500	1499	1501	2003	2000
36	323	315	327	320	330	540	545	531	528	544	1070	1072	1068	1079	1080	1600	1627	1622	1626	1593	2161	2141	2192	2152	2137		36	301	300	300	301	300	501	500	500	498	500	1001	1000	1000	1000	1000	1501	1504	1500	1499	1501	2003	2000
37	323	316	330	320	331	541	548	533	528	546	1076	1077	1072	1084	1081	1613	1634	1629	1639	1603	2169	2150	2200	2159	2149		37	301	300	300	301	300	501	500	501	498	500	1001	1001	1000	1000	1001	1501	1504	1500	1500	1503	2004	2000
38	324	320	332	325	335	544	552	535	533	551	1083	1089	1080	1093	1093	1623	1643	1634	1656	1624	2194	2171	2211	2184	2166		38	301	300	300	301	300	501	500	501	498	500	1001	1001	1000	1000	1001	1501	1504	1500	1500	1503	2004	2000
39	324	321	332	327	335	545	553	537	535	551	1086	1090	1083	1096	1094	1625	1649	1638	1657	1629	2197	2176	2219	2187	2168		39	301	300	300	301	300	501	500	501	498	500	1001	1001	1000	1000	1001	1501	1504	1500	1500	1503	2004	2000
40	324	322	334	327	334	545	554	538	536	552	1092	1090	1084	1100	1095	1627	1651	1643	1659	1632	2203	2182	2226	2190	2171		40	301	300	300	301	300	501	500	501	498	500	1001	1001	1000	1000	1001	1501	1504	1500	1500	1503	2004	2000
41	326	324	334	328	334	546	555	538	537	554	1093	1095	1088	1100	1099	1633	1659	1647	1663	1635	2213	2188	2230	2192	2174		41	301	300	300	301	300	501	500	501	498	500	1001	1001	1000	1000	1001	1501	1504	1500	1500	1503	2004	2000
42	326	324	337	328	334	546	556	538	538	555	1095	1096	1092	1106	1102	1635	1667	1650	1667	1643	2213	2191	2233	2192	2179		42	301	300	300	301	300	501	500	501	498	500	1001	1001	1000	1000	1001	1501	1504	1500	1500	1503	2004	2000
43	326	324	337	328	334	546	556	538	538	555	1095	1096	1092	1106	1102	1635	1667	1650	1667	1642	2213	2191	2233	2192	2179		43	301	300	300	301	300	501	500	501	498	500	1001	1001	1000	1000	1001	1501	1504	1500	1500	1503	2004	2000
44	328	324	338	329	335	546	558	539	539	555	1097	1099	1094	1109	1104	1644	1669	1651	1671	1644	2221	2196	2239	2199	2182		44	301	300	300	301	300	501	500	501	498	500	1001	1001	1000	1000	1001	1501	1504	1500	1500	1503	2004	2000
45	328	324	338	331	335	546	559	541	539	557	1101	1101	1095	1111	1107	1648	1670	1654	1673	1651	2225	2199	2243	2203	2186		45	301	300	300	301	300	501	500	501	498	500	1001	1001	1000	1000	1001	1501	1504	1500	1500	1503	2004	2000
46	331	324	339	331	337	546	561	543	539	558	1103	1104	1097	1115	1108	1650	1670	1658	1675	1653	2227	2204	2247	2218	2191		46	301	300	300	301	300	501	500	501	498	500	1001	1001	1000	1000	1001	1501	1504	1500	1500	1503	2004	2000
47	334	324	340	331	339	548	563	549	541	560	1107	1110	1104	1122	1109	1656	1672	1664	1680	1658	2235	2211	2258	2222	2202		47	301	300	300	301	300	501	500	500	498	500	1001	1001	1000	1000	1001	1501	1504	1500	1500	1503	2004	2000
48	335	324	340	334	341	549	565	554	544	565	1110	1115	1109	1129	1115	1665	1678	1669	1684	1671	2242	2219	2268	2235	2213		48	301	300	300	301	300	501	500	500	498	500	1001	1001	1000	1000	1001	1501	1504	1500	1500	1503	2004	2000
49	335	325	342	339	344	551	567	556	545	569	1113	1121	1112	1135	1121	1675	1687	1677	1694	1676	2255	2227	2279	2247	2223		49	301	300	300	301	300	501	500	500	498	500	1001	1001	1000	1000	1001	1501	1504	1500	1500	1503	2004	2000
50	337	328	344	341	344	555	568	558	546	571	1117	1128	1117	1137	1124	1678	1691	1681	1703	1681	2259	2242	2283	2261	2234		50	301	300	300	301	300	501	500	500	498	500	1001	1001	1000	1000	1001	1501	1504	1500	1500	1503	2004	2000
51	341	328	348	342	345	556	569	560	548	574	1125	1132	1120	1142	1130	1692	1698	1692	1709	1687	2267	2250	2288	2277	2243		51	301	300	300	301	300	501	500	500	498	500	1001	1001	1000	1000	1001	1501	1504	1500	1500	1503	2004	2000
52	341	328	348	342	345	556	569	560	548	574	1123	1132	1120	1141	1130	1692	1698	1691	1709	1687	2267	2250	2288	2277	2243		52	301	300	300	301	300	501	500	500	498	500	1001	1002	1000	1000	1003	1502	1504	1500	1500	1503	2004	2000
53	343	329	348	344	346	559	572	564	549	575	1125	1135	1122	1141	1135	1695	1700	1693	1715	1692	2269	2251	2288	2285	2246		53	301	300	300	301	300	501	500	500	498	500	1001	1002	1000	1000	1003	1502	1504	1500	1500	1503	2004	2000
54	344	332	352	345	348	561	573	565	552	578	1132	1136	1125	1144	1139	1698	1705	1702	1723	1700	2281	2256	2301	2293	2258		54	301	300	300	301	300	501	500	500	498	500	1001	1002	1000	1000	1003	1502	1504	1500	1500	1503	2004	2000
55	346	334	353	345	348	562	575	566	552	580	1136	1141	1128	1146	1141	1700	1709	1708	1727	1702	2286	2261	2303	2295	2263		55	301	300	300	301	300	501	500	500	498	500	1001	1002	1000	1000	1003	1502	1504	1500	1500	1503	2004	2000
56	349	335	355	346	348	564	576	567	554	580	1145	1147	1135	1158	1145	1709	1718	1715	1733	1708	2295	2271	2310	2308	2278		56	301	300	300	301	300	501	500	500	498	500	1001	1002	1000	1000	1003	1502	1504	1500	1500	1503	2004	2000
57	349	335	355	346	348	564	576	567	554	580	1145	1146	1135	1158	1145	1709	1718	1715	1733	1708	2295	2271	2309	2308	2277		57	301	300	300	301	300	501	500	500	498	500	1001	1002	1000	1000	1003	1502	1504	1500	1500	1503	2004	2000
58	351	336	357	346	349	570	577	571	556	580	1148	1154	1138	1162	1154	1719	1727	1730	1746	1717	2301	2285	2317	2316	2283		58	301	300	300	301	300	501	500	500	498	500	1001	1002	1000	1000	1003	1502	1504	1500	1500	1503	2004	2000
59	351	336	357	346	349	570	577	571	556	580	1148	1154	1138	1162	1154	1719	1727	1730	1746	1717	2301	2284	2316	2316	2283		59	301	300	300	301	300	501	500	499	498	500	1001	1002	999	1000	1003	1501	1504	1500	1500	1503	2004	2000
60	352	336	358	348	350	573	580	575	558	582	1153	1163	1144	1165	1156	1726	1736	1735	1760	1725	2308	2294	2328	2324	2299		60	301	300	300	301	300	501	500	499	498	500	1001	1002	999	1001	1003	1501	1504	1501	1500	1503	2003	2000
61	353	337	360	348	352	574	581	575	559	585	1156	1163	1146	1166	1159	1733	1737	1739	1763	1728	2311	2300	2334	2330	2304		61	301	300	300	301	300	501	500	499	498	500	1001	1002	999	1001	1003	1501	1504	1501	1500	1503	2003	2000
62	353	337	360	348	352	574	581	574	559	585	1156	1163	1146	1166	1159	1733	1737	1739	1761	1728	2311	2300	2334	2328	2304		62	301	300	300	301	300	501	500	499	498	500	1001	1003	999	1001	1003	1502	1504	1501	1500	1503	2003	2000
63	354	337	361	349	354	574	582	575	559	586	1156	1166	1150	1166	1161	1740	1740	1743	1767	1731	2315	2304	2339	2335	2309		63	301	300	300	301	300	501	500	499	498	500	1001	1003	999	1001	1003	1502	1504	1501	1500	1503	2003	2000
64	356	337	361	354	355	576	586	576	561	587	1158	1172	1152	1171	1168	1743	1746	1755	1773	1743	2328	2317	2349	2343	2316		64	301	300	300	301	300	501	500	499	498	500	1001	1003	999	1001	1003	1502	1504	1501	1500	1503	2003	2000
65	358	337	363	354	356	576	588	576	563	589	1161	1175	1154	1172	1172	1744	1749	1757	1775	1747	2330	2324	2354	2348	2323		65	301	300	300	301	300	501	500	499	498	500	1001	1003	999	1001	1003	1502	1504	1501	1500	1503	2003	2000
66	358	339	368	355	358	579	589	576	563	592	1164	1185	1159	1173	1177	1751	1754	1763	1777	1756	2335	2338	2359	2352	2330		66	301	300	300	301	300	501	500	499	498	500	1001	1003	999	1001	1003	1502	1504	1501	1500	1503	2003	2000
67	359	339	368	356	359	579	590	576	565	594	1165	1188	1161	1176	1179	1756	1756	1764	1780	1756	2337	2343	2363	2357	2332		67	301	300	300	301	300	499	499	499	498	500	1001	1003	998	1001	1003	1502	1504	1500	1499	1503	2002	1999
68	359	342	371	357	360	582	594	580	567	598	1170	1193	1166	1177	1184	1762	1762	1773	1783	1762	2343	2355	2375	2362	2344		68	302	300	301	301	303	499	499	499	499	500	1001	1004	999	1003	1004	1506	1505	1505	1500	1503	2006	2001
69	362	343	374	359	364	590	598	581	567	599	1179	1197	1169	1183	1188	1776	1768	1787	1790	1775	2357	2370	2400	2377	2354		69	302	300	301	301	303	499	499	499	499	500	1001	1004	999	1003	1004	1506	1505	1505	1500	1503	2006	2001
70	368	343	375	359	365	596	600	587	571	602	1191	1203	1179	1195	1195	1793	1782	1803	1804	1791	2377	2385	2416	2402	2368		70	302	300	301	301	303	499	499	499	499	500	1001	1004	999	1003	1004	1506	1505	1505	1500	1503	2006	2001
71	368	343	375	359	365	596	600	587	571	602	1190	1203	1179	1195	1195	1793	1782	1803	1804	1791	2377	2385	2416	2402	2368		71	302	300	301	301	303	499	499	499	499	500	1001	1004	999	1003	1004	1505	1505	1505	1500	1503	2006	2001
72	368	343	375	359	365	596	600	587	571	602	1190	1203	1179	1195	1195	1793	1782	1803	1804	1791	2377	2385	2416	2402	2368		72	302	300	301	301	303	499	499	500	499	500	1001	1004	999	1003	1004	1506	1505	1505	1500	1503	2006	2001
73	368	343	375	359	365	596	599	587	571	602	1190	1203	1179	1195	1194	1793	1782	1803	1804	1791	2377	2385	2416	2402	2368		73	302	300	301	301	303	499	499	500	499	500	1001	1004	999	1003	1004	1506	1505	1505	1500	1503	2006	2001
74	370	345	377	360	365	597	604	590	576	604	1195	1212	1182	1200	1201	1797	1790	1806	1810	1797	2384	2396	2423	2409	2380		74	302	300	301	301	303	499	499	500	499	500	1001	1004	999	1003	1004	1506	1505	1505	1500	1503	2006	2001
75	371	346	377	360	369	601	604	591	577	609	1199	1217	1186	1208	1206	1805	1798	1816	1818	1806	2392	2409	2432	2423	2389		75	302	300	301	301	303	499	499	500	499	500	1001	1004	999	1003	1004	1506	1505	1505	1500	1503	2006	2001
76	372	347	378	361	370	601	604	592	577	609	1205	1218	1191	1213	1208	1811	1803	1819	1821	1808	2398	2417	2435	2429	2394		76	302	300	301	301	303	499	499	500	499	500	1001	1004	999	1003	1004	1506	1505	1505	1500	1503	2006	2001
77	372	347	378	361	370	600	604	592	577	609	1205	1218	1191	1213	1208	1811	1803	1819	1821	1808	2398	2417	2435	2429	2394		77	302	300	301	301	303	499	499	500	499	500	1001	1004	999	1003	1004	1506	1505	1505	1500	1503	2006	2001
78	372	347	379	363	372	602	607	596	579	614	1219	1223	1199	1219	1214	1818	1807	1825	1828	1814	2413	2426	2445	2434	2408		78	302	300	301	301	303	499	499	500	499	500	1001	1004	999	1003	1004	1506	1505	1505	1500	1503	2006	2001
79	372	347	379	363	372	602	607	596	579	613	1219	1223	1199	1219	1214	1818	1807	1825	1828	1814	2413	2426	2445	2434	2408		79	302	300	301	301	303	499	500	500	499	501	1001	1004	999	1003	1004	1506	1505	1505	1500	1503	2006	2001
80	372	348	381	363	372	604	608	597	580	613	1222	1222	1201	1220	1218	1822	1812	1832	1835	1818	2418	2429	2450	2438	2413		80	302	300	301	301	303	499	500	500	499	501	1001	1004	999	1003	1004	1506	1505	1505	1500	1503	2006	2001
81	372	348	381	363	372	604	608	597	580	613	1222	1222	1201	1220	1218	1822	1812	1832	1833	1818	2418	2429	2450	2438	2413		81	302	300	301	301	303	499	500	500	499	501	1001	1004	999	1003	1004	1506	1505	1505	1500	1503	2006	2001
82	374	349	381	365	372	605	609	600	583	615	1224	1224	1201	1225	1221	1824	1814	1836	1838	1826	2423	2433	2454	2445	2416		82	302	300	301	301	303	499	500	500	499	501	1001	1004	999	1003	1004	1506	1505	1505	1500	1503	2006	2001
83	375	351	382	365	372	606	610	601	583	616	1226	1226	1203	1226	1225	1826	1817	1838	1841	1831	2424	2437	2456	2454	2422		83	302	300	301	301	303	499	500	500	499	501	1001	1004	999	1003	1004	1506	1505	1505	1500	1503	2006	2001
84	375	351	382	365	372	606	610	601	583	616	1226	1226	1203	1226	1225	1826	1817	1838	1841	1831	2424	2437	2456	2454	2422		84	302	300	301	301	303	499	500	500	499	501	1001	1004	999	1002	1004	1506	1505	1505	1500	1503	2006	2001
85	375	352	382	366	374	608	610	602	583	616	1228	1230	1204	1229	1227	1828	1820	1840	1847	1836	2425	2439	2465	2460	2429		85	302	300	301	301	303	499	500	500	499	501	1001	1004	999	1002	1004	1506	1505	1505	1500	1503	2006	2001
86	376	353	383	367	374	609	611	603	584	618	1231	1231	1206	1230	1231	1837	1826	1844	1849	1837	2430	2440	2469	2466	2433		86	302	300	301	301	303	499	500	500	499	501	1001	1004	999	1002	1004	1505	1505	1505	1500	1502	2006	2001
87	377	353	383	368	374	610	613	605	584	618	1232	1234	1208	1234	1233	1845	1827	1849	1850	1837	2433	2443	2476	2473	2437		87	302	300	301	301	303	499	500	500	499	501	1001	1004	999	1002	1004	1505	1505	1505	1500	1502	2007	2001
88	377	353	383	368	374	610	613	605	584	618	1232	1234	1208	1234	1233	1845	1827	1849	1850	1837	2433	2441	2476	2473	2437		88	302	300	301	301	303	499	500	500	499	501	1001	1004	999	1002	1004	1505	1505	1505	1500	1502	2007	2001
89	379	354	386	368	374	612	614	607	584	622	1240	1238	1216	1238	1240	1851	1836	1859	1859	1841	2447	2450	2483	2479	2444		89	302	300	301	301	303	499	500	500	499	501	1001	1004	999	1002	1004	1505	1505	1505	1500	1502	2007	2001
90	382	357	387	368	376	616	617	610	588	624	1243	1242	1219	1241	1247	1861	1839	1866	1866	1849	2461	2461	2499	2489	2454		90	302	300	301	301	303	499	500	500	499	501	1001	1004	999	1002	1004	1505	1505	1505	1500	1502	2007	2001
91	382	357	387	368	376	616	617	610	588	624	1243	1242	1219	1241	1247	1860	1839	1866	1866	1849	2461	2461	2499	2489	2453		91	302	300	301	301	303	499	500	500	499	501	1001	1004	999	1002	1004	1505	1505	1505	1500	1502	2007	2001
92	382	357	387	367	376	616	617	610	588	624	1243	1242	1219	1241	1246	1859	1838	1865	1866	1848	2460	2461	2498	2488	2453		92	302	300	301	301	303	499	500	500	499	501	1001	1004	999	1002	1004	1505	1505	1505	1500	1502	2007	2001
93	387	358	387	368	379	621	618	612	589	627	1254	1248	1227	1247	1254	1864	1844	1881	1880	1855	2470	2472	2508	2502	2456		93	302	300	301	301	303	499	500	500	499	501	1001	1004	999	1002	1004	1505	1505	1506	1500	1502	2008	2001
94	387	358	386	368	379	621	618	612	589	627	1254	1248	1227	1247	1254	1864	1844	1881	1880	1855	2470	2472	2508	2502	2456		94	302	300	301	301	303	499	500	500	499	501	1001	1004	999	1002	1004	1505	1505	1506	1500	1502	2008	2001
95	387	359	385	370	381	623	622	616	592	632	1260	1258	1233	1254	1263	1871	1866	1885	1892	1866	2480	2482	2517	2513	2472		95	302	300	301	301	303	499	500	500	499	501	1001	1004	999	1002	1004	1505	1505	1506	1500	1502	2008	2001
96	390	362	384	370	381	624	624	617	594	634	1263	1257	1234	1254	1267	1878	1867	1889	1895	1866	2484	2489	2524	2521	2475		96	302	300	301	301	303	499	500	500	499	501	1001	1005	999	1002	1004	1505	1505	1506	1500	1502	2008	2001
97	390	362	384	372	384	625	626	621	595	635	1270	1259	1238	1257	1271	1882	1872	1896	1902	1876	2494	2500	2537	2532	2486		97	302	300	301	301	303	499	500	500	499	501	1001	1005	999	1002	1004	1505	1505	1506	1500	1502	2008	2001
98	391	362	387	372	384	628	629	623	598	638	1270	1262	1244	1260	1278	1885	1883	1902	1909	1884	2509	2511	2546	2538	2495		98	302	300	301	301	303	499	500	500	499	501	1001	1005	999	1002	1004	1505	1505	1506	1500	1502	2008	2001
99	392	362	387	372	384	629	634	624	599	639	1272	1264	1247	1263	1284	1885	1883	1904	1911	1889	2512	2518	2553	2544	2504		99	302	300	301	301	303	499	500	500	499	501	1001	1005	999	1002	1004	1505	1505	1506	1500	1502	2008	2001
100	393	363	388	374	385	632	638	625	601	643	1276	1266	1252	1270	1289	1891	1894	1905	1919	1899	2520	2528	2558	2552	2510		100	302	300	301	301	303	499	500	500	499	501	1001	1005	999	1002	1004	1505	1505	1506	1500	1502	2008	2001
101	393	363	388	375	385	634	641	625	601	644	1276	1267	1254	1275	1290	1895	1897	1911	1924	1904	2528	2533	2560	2553	2514		101	302	300	301	301	303	499	500	501	499	501	1001	1005	999	1002	1004	1505	1505	1506	1500	1502	2008	2002
102	393	363	388	375	385	634	641	625	601	644	1276	1267	1254	1275	1290	1895	1897	1911	1924	1904	2528	2533	2560	2553	2514		102	302	300	301	301	303	499	500	501	499	501	1001	1005	999	1002	1004	1505	1505	1506	1500	1502	2008	2002
103	394	364	389	378	387	637	643	628	605	649	1284	1274	1258	1282	1304	1909	1907	1920	1934	1925	2542	2549	2578	2565	2525		103	302	300	301	301	303	499	500	501	499	501	1001	1005	999	1002	1004	1505	1505	1506	1500	1502	2008	2002
104	394	364	388	378	387	637	643	628	605	649	1284	1274	1258	1282	1303	1909	1907	1920	1934	1924	2542	2548	2578	2564	2524		104	302	300	301	301	303	499	500	501	499	501	1001	1005	999	1002	1004	1505	1505	1506	1500	1502	2008	2001
105	394	364	390	380	388	639	645	634	608	651	1286	1278	1264	1287	1308	1917	1910	1929	1940	1935	2549	2563	2585	2577	2534		105	302	300	301	301	303	499	500	501	499	501	1001	1005	999	1002	1004	1506	1505	1506	1500	1502	2009	2001
106	393	366	391	385	394	641	648	637	610	655	1292	1281	1274	1293	1315	1931	1929	1941	1951	1942	2561	2574	2599	2586	2549		106	302	300	301	301	303	499	500	501	499	501	1001	1005	999	1002	1004	1506	1505	1506	1500	1502	2009	2001
107	393	366	391	385	394	641	648	637	610	655	1292	1281	1274	1293	1315	1931	1929	1941	1951	1942	2561	2574	2599	2586	2549		107	302	300	301	301	303	499	500	501	499	501	1001	1005	999	1002	1004	1506	1505	1506	1500	1502	2009	2001
108	393	368	395	387	396	645	650	639	612	657	1297	1285	1281	1303	1322	1937	1934	1950	1958	1950	2575	2584	2611	2596	2562		108	302	300	301	301	303	499	500	501	499	501	1001	1005	999	1002	1004	1506	1504	1506	1500	1502	2009	2001
109	394	370	396	388	398	647	652	642	614	658	1298	1290	1285	1310	1325	1946	1940	1959	1962	1957	2580	2593	2621	2610	2572		109	302	300	301	301	303	499	500	501	499	501	1001	1005	999	1002	1004	1506	1504	1506	1500	1502	2010	2001
110	394	372	396	390	398	647	654	643	620	660	1301	1294	1286	1310	1327	1948	1945	1963	1965	1957	2585	2598	2626	2617	2575		110	302	300	301	301	303	499	500	501	499	501	1001	1005	999	1002	1004	1506	1504	1506	1500	1502	2010	2001
111	394	372	396	390	398	647	654	643	620	660	1301	1292	1286	1310	1327	1948	1944	1963	1965	1957	2584	2598	2626	2616	2575		111	302	300	301	301	303	499	500	501	499	501	1001	1005	999	1002	1004	1506	1504	1506	1500	1502	2010	2001
112	394	372	396	390	398	647	654	643	620	660	1301	1292	1286	1310	1327	1948	1944	1963	1965	1957	2584	2598	2626	2616	2575		112	302	300	301	301	303	499	500	501	499	501	1001	1005	999	1002	1004	1506	1504	1506	1500	1502	2010	2001
113	394	372	396	390	398	647	654	643	620	660	1301	1292	1286	1310	1327	1948	1944	1963	1965	1957	2584	2597	2626	2616	2575		113	302	300	301	301	303	499	500	501	499	501	1001	1005	999	1002	1004	1506	1504	1506	1500	1502	2010	2001
114	394	372	396	390	398	647	654	643	619	660	1300	1292	1286	1310	1327	1948	1944	1962	1965	1957	2584	2597	2626	2616	2575		114	302	300	301	301	303	499	500	501	499	501	1001	1005	999	1002	1004	1506	1504	1506	1500	1502	2010	2001
115	396	375	395	391	399	653	654	645	625	662	1304	1297	1294	1315	1335	1959	1954	1971	1972	1962	2595	2608	2637	2626	2586		115	302	300	301	301	303	499	500	501	499	501	1001	1005	999	1002	1004	1506	1504	1506	1500	1502	2010	2001
116	396	375	395	391	399	653	654	645	625	662	1304	1297	1294	1314	1335	1959	1954	1971	1972	1962	2595	2608	2637	2624	2586		116	302	300	301	301	303	499	500	501	499	501	1001	1005	999	1002	1004	1506	1504	1506	1500	1502	2010	2001
117	397	377	396	394	400	655	657	647	627	664	1306	1305	1301	1317	1337	1968	1959	1974	1976	1970	2606	2627	2650	2631	2599		117	302	300	301	301	303	499	500	500	499	501	1001	1005	999	1002	1004	1506	1504	1506	1500	1502	2010	2001
118	397	377	396	394	400	655	657	647	627	664	1306	1305	1301	1317	1336	1967	1959	1973	1976	1970	2606	2627	2649	2630	2598		118	302	300	301	301	303	499	500	500	499	501	1001	1005	999	1002	1004	1506	1504	1506	1500	1502	2010	2001
119	401	378	397	400	405	657	664	652	634	667	1315	1315	1314	1324	1343	1981	1976	1991	1990	1991	2626	2648	2662	2651	2616		119	302	300	301	301	303	499	500	500	499	501	1001	1005	999	1002	1004	1506	1504	1506	1500	1502	2010	2001
120	406	380	397	403	407	657	668	653	636	668	1321	1316	1319	1327	1350	1991	1987	1996	1995	2002	2635	2657	2668	2663	2632		120	302	300	301	301	303	499	500	500	499	501	1001	1005	999	1002	1004	1506	1504	1506	1500	1502	2010	2001
121	410	383	401	408	410	662	671	658	644	670	1336	1321	1326	1336	1360	2006	2004	2015	2014	2016	2664	2677	2687	2693	2655		121	302	300	301	301	303	499	500	500	499	501	1001	1005	999	1002	1004	1506	1504	1506	1500	1502	2010	2001
122	410	384	402	408	410	664	672	658	646	670	1336	1326	1330	1340	1363	2011	2007	2015	2020	2018	2668	2680	2690	2698	2659		122	302	300	301	301	303	499	500	500	499	501	1001	1005	999	1002	1004	1506	1504	1506	1500	1502	2010	2001
123	410	386	403	408	411	665	672	662	646	671	1338	1328	1332	1343	1367	2015	2010	2019	2024	2019	2670	2682	2697	2700	2662		123	302	300	301	301	303	499	500	500	499	501	1001	1005	999	1002	1004	1506	1504	1506	1500	1502	2010	2001
124	412	386	403	410	411	666	673	666	646	674	1341	1331	1337	1345	1368	2018	2012	2020	2030	2022	2675	2687	2699	2704	2668		124	302	300	301	301	303	499	500	500	499	501	1001	1005	999	1002	1004	1506	1504	1507	1500	1503	2010	2001
125	414	389	403	413	412	669	676	669	647	679	1347	1333	1342	1348	1373	2025	2023	2033	2038	2031	2684	2696	2709	2715	2680		125	302	300	301	301	303	499	500	500	499	501	1001	1005	999	1002	1004	1506	1504	1507	1500	1503	2010	2001
126	415	389	406	418	413	670	679	670	648	683	1352	1339	1346	1351	1374	2031	2027	2039	2045	2039	2697	2706	2719	2725	2693		126	302	300	301	301	303	499	500	500	499	501	1001	1005	999	1002	1004	1506	1504	1507	1500	1503	2010	2001
127	415	392	409	420	413	672	680	672	652	686	1362	1347	1354	1353	1380	2041	2035	2045	2050	2047	2710	2716	2730	2732	2699		127	302	300	301	301	303	499	500	500	499	501	1001	1005	999	1002	1004	1506	1504	1507	1500	1503	2010	2001
128	416	394	413	422	414	675	683	678	655	692	1362	1353	1365	1362	1386	2051	2044	2063	2060	2058	2727	2721	2744	2745	2714		128	302	300	301	301	303	499	500	500	499	500	1001	1005	999	1002	1003	1506	1503	1507	1500	1503	2010	2001
129	417	395	414	426	416	678	685	680	659	696	1370	1358	1370	1369	1396	2062	2049	2069	2062	2060	2733	2729	2753	2750	2731		129	302	300	301	301	304	499	500	501	499	500	1001	1005	1001	1004	1005	1510	1502	1508	1502	1503	2013	2004
130	420	395	414	428	417	681	687	682	662	698	1376	1363	1378	1374	1406	2068	2055	2077	2068	2067	2746	2740	2757	2758	2741		130	302	300	301	301	304	499	500	501	499	500	1001	1005	1001	1004	1005	1510	1502	1508	1502	1503	2013	2004
131	420	396	414	431	419	684	687	689	669	701	1383	1369	1387	1381	1411	2079	2069	2087	2076	2079	2758	2752	2767	2767	2761		131	302	300	301	301	304	499	500	501	499	500	1001	1005	1001	1004	1005	1510	1502	1508	1502	1503	2013	2004
132	423	400	418	434	424	690	698	692	674	703	1393	1379	1400	1394	1419	2092	2084	2099	2093	2096	2778	2767	2785	2787	2780		132	302	300	301	301	304	499	500	501	499	500	1001	1005	1001	1004	1005	1510	1502	1508	1502	1503	2013	2004
133	427	404	423	438	425	693	705	698	679	705	1405	1388	1411	1405	1427	2107	2091	2110	2102	2116	2793	2788	2805	2801	2798		133	302	300	301	301	304	499	500	501	499	500	1001	1005	1001	1004	1005	1510	1502	1508	1502	1503	2013	2004
134	430	405	423	439	426	697	709	700	679	706	1410	1394	1420	1410	1439	2112	2100	2118	2112	2124	2809	2796	2815	2809	2809		134	302	300	301	301	304	499	500	501	499	500	1001	1005	1001	1004	1005	1510	1502	1508	1502	1503	2013	2004
135	433	407	425	442	428	702	715	708	684	709	1420	1404	1434	1422	1446	2129	2117	2124	2129	2142	2835	2819	2837	2822	2834		135	302	300	301	301	304	499	500	501	499	500	1001	1005	1001	1004	1005	1510	1502	1508	1502	1503	2013	2004
136	435	407	427	443	428	704	716	712	687	710	1426	1407	1445	1425	1447	2137	2124	2131	2136	2147	2847	2826	2848	2835	2842		136	302	300	301	301	304	499	500	501	499	500	1001	1005	1001	1004	1005	1510	1502	1508	1502	1503	2013	2004
137	435	409	428	443	428	704	718	713	691	711	1432	1420	1444	1433	1453	2144	2131	2139	2141	2153	2856	2839	2865	2845	2850		137	302	300	301	301	304	499	500	501	499	500	1001	1005	1001	1004	1005	1510	1502	1508	1502	1503	2013	2004
138	435	409	428	443	428	704	718	713	692	711	1432	1420	1445	1434	1452	2143	2131	2139	2141	2153	2855	2838	2866	2845	2850		138	302	300	301	301	304	499	500	501	499	500	1001	1005	1001	1004	1005	1509	1502	1508	1502	1503	2013	2004
139	436	409	428	444	428	708	719	712	693	713	1436	1421	1449	1437	1457	2147	2134	2140	2144	2158	2859	2842	2874	2848	2859		139	302	300	301	301	304	499	500	501	499	500	1001	1005	1001	1004	1005	1509	1502	1508	1502	1503	2013	2004
140	438	410	429	447	428	712	720	714	694	715	1440	1426	1454	1439	1462	2154	2138	2145	2149	2173	2870	2845	2884	2861	2867		140	302	300	301	301	304	499	500	501	499	500	1001	1005	1001	1004	1005	1509	1502	1508	1502	1503	2013	2004
141	439	410	429	447	430	715	720	720	695	717	1442	1427	1457	1441	1465	2161	2142	2148	2150	2177	2878	2853	2891	2869	2875		141	302	300	301	301	304	499	500	501	499	500	1001	1005	1001	1004	1005	1509	1502	1508	1502	1503	2013	2004
142	441	413	431	449	432	720	722	721	696	718	1445	1432	1463	1445	1469	2171	2157	2155	2153	2186	2892	2862	2907	2878	2888		142	302	300	301	301	304	499	500	501	499	500	1001	1005	1001	1004	1005	1509	1502	1508	1502	1503	2013	2004
143	442	414	432	449	433	722	724	725	699	722	1451	1435	1470	1448	1471	2183	2166	2166	2161	2193	2904	2875	2916	2892	2897		143	302	300	301	301	304	499	500	501	499	500	1001	1005	1001	1004	1005	1509	1502	1508	1502	1503	2013	2004
144	442	414	436	451	435	724	729	728	700	724	1456	1436	1475	1456	1473	2192	2172	2178	2171	2201	2917	2883	2931	2903	2904		144	302	300	301	301	304	499	500	501	499	500	1001	1005	1001	1004	1005	1509	1502	1508	1502	1503	2013	2004
145	442	414	436	451	436	725	729	728	700	724	1456	1436	1476	1456	1476	2195	2172	2179	2174	2201	2917	2882	2932	2905	2904		145	302	300	301	301	304	499	500	501	499	500	1001	1005	1001	1004	1005	1509	1502	1508	1502	1503	2012	2004
146	442	415	438	451	439	727	730	728	702	728	1462	1439	1479	1457	1477	2196	2177	2181	2178	2206	2927	2887	2937	2908	2907		146	302	300	301	301	304	499	500	501	499	500	1001	1005	1001	1004	1005	1509	1502	1508	1502	1503	2012	2004
147	442	415	438	451	439	727	731	727	704	728	1461	1440	1481	1456	1477	2196	2178	2184	2180	2209	2927	2892	2938	2908	2910		147	302	300	301	301	304	499	500	501	499	500	1001	1005	1001	1004	1005	1509	1502	1508	1502	1503	2012	2004
148	442	415	440	451	440	729	734	730	707	729	1463	1442	1483	1458	1480	2203	2189	2185	2182	2212	2930	2896	2946	2912	2916		148	302	300	301	301	304	499	500	501	499	500	1001	1005	1001	1004	1005	1509	1502	1508	1502	1503	2012	2004
149	442	417	441	453	443	729	734	731	708	729	1464	1445	1485	1460	1483	2210	2191	2188	2183	2214	2937	2901	2952	2916	2921		149	302	300	301	301	304	499	500	501	499	500	1001	1005	1001	1004	1005	1509	1502	1508	1502	1503	2012	2004
150	442	417	441	453	444	729	734	732	710	729	1465	1445	1486	1461	1483	2210	2189	2190	2184	2214	2937	2903	2953	2916	2923		150	302	300	301	301	304	499	500	501	499	500	1001	1005	1001	1004	1005	1509	1502	1508	1502	1503	2012	2004
151	444	419	442	455	445	730	735	735	710	731	1469	1447	1489	1465	1484	2215	2191	2194	2193	2223	2947	2914	2960	2923	2930		151	302	300	301	301	304	499	500	501	499	500	1001	1005	1001	1004	1005	1509	1502	1508	1502	1503	2012	2004
152	446	421	444	459	446	732	738	738	715	735	1472	1449	1495	1468	1487	2224	2200	2203	2200	2232	2957	2921	2971	2930	2938		152	302	300	301	301	304	499	500	501	499	500	1001	1005	1001	1004	1005	1509	1502	1508	1502	1503	2012	2004
153	446	423	445	459	447	733	741	741	716	735	1476	1450	1499	1473	1489	2227	2205	2206	2204	2236	2961	2927	2977	2932	2947		153	302	300	301	301	304	499	500	501	499	500	1001	1005	1001	1004	1005	1509	1502	1508	1502	1503	2012	2004
154	448	425	446	462	449	740	746	745	720	738	1484	1460	1516	1483	1498	2241	2221	2222	2217	2247	2978	2958	2995	2957	2969		154	302	300	301	301	304	499	500	501	499	500	1001	1005	1001	1004	1005	1509	1502	1508	1502	1503	2012	2004
155	448	426	447	462	453	741	750	747	723	740	1484	1466	1517	1487	1503	2245	2228	2227	2222	2252	2982	2963	3002	2965	2980		155	302	300	301	301	304	499	500	501	499	500	1001	1005	1001	1004	1005	1509	1502	1508	1502	1503	2012	2004
156	454	426	447	465	453	749	756	753	727	744	1494	1482	1529	1503	1511	2260	2246	2248	2236	2259	3002	2980	3025	2991	3004		156	302	300	301	301	304	499	500	501	499	500	1001	1005	1001	1004	1005	1509	1502	1508	1502	1503	2012	2004
157	458	428	451	466	454	752	763	757	736	748	1502	1489	1540	1508	1522	2272	2262	2257	2245	2269	3019	2996	3045	3012	3021		157	302	300	301	301	304	499	500	501	499	500	1001	1005	1001	1004	1005	1509	1502	1508	1502	1503	2012	2004
158	459	428	451	466	454	752	764	757	737	749	1502	1493	1540	1510	1523	2273	2262	2260	2247	2270	3023	2998	3048	3013	3021		158	302	300	301	301	304	499	500	501	499	500	1001	1005	1001	1004	1005	1509	1502	1508	1502	1503	2012	2004
159	460	431	450	466	456	752	767	758	742	752	1508	1499	1544	1514	1526	2277	2270	2272	2256	2282	3033	3010	3063	3019	3036		159	302	300	301	301	304	499	500	501	499	500	1001	1005	1001	1004	1005	1509	1502	1508	1502	1503	2012	2004
160	461	435	450	469	459	754	769	758	744	752	1513	1509	1546	1520	1528	2284	2279	2279	2264	2286	3045	3020	3076	3032	3050		160	302	300	301	301	304	499	500	501	499	500	1001	1005	1001	1004	1005	1509	1502	1508	1502	1503	2012	2004
161	462	439	452	472	460	758	772	763	747	758	1520	1516	1554	1529	1534	2291	2288	2292	2273	2294	3062	3032	3084	3041	3061		161	302	300	301	301	304	499	500	501	499	500	1001	1005	1001	1004	1005	1509	1502	1508	1502	1503	2012	2004
162	464	443	455	476	466	770	780	772	756	767	1525	1525	1561	1546	1541	2312	2305	2310	2288	2314	3095	3054	3107	3069	3095		162	302	300	301	301	304	499	500	501	499	500	1001	1005	1001	1004	1005	1509	1502	1508	1502	1503	2012	2004
163	464	444	456	478	467	772	781	773	759	770	1529	1527	1564	1553	1542	2318	2310	2312	2293	2319	3102	3062	3113	3073	3103		163	302	300	301	301	304	499	500	501	499	500	1001	1005	1001	1004	1005	1509	1502	1508	1502	1503	2012	2004
164	464	445	456	478	467	773	782	773	759	770	1530	1528	1568	1555	1542	2321	2310	2314	2298	2321	3102	3063	3118	3075	3105		164	302	300	301	301	304	499	500	501	499	500	1001	1005	1001	1004	1005	1509	1502	1508	1502	1503	2012	2004
165	466	448	456	480	469	776	785	773	761	774	1533	1536	1577	1565	1548	2333	2315	2322	2308	2334	3112	3081	3131	3091	3118		165	302	300	301	301	304	499	500	501	499	500	1001	1005	1001	1004	1005	1509	1502	1508	1502	1503	2012	2004
166	467	449	456	481	470	776	785	773	761	775	1534	1535	1577	1566	1549	2336	2317	2325	2308	2334	3111	3086	3137	3094	3119		166	302	300	301	301	304	499	500	501	499	500	1001	1005	1001	1004	1005	1509	1502	1508	1502	1503	2012	2004
167	468	453	459	481	470	778	786	774	763	775	1539	1537	1581	1570	1553	2337	2320	2329	2315	2344	3122	3089	3141	3099	3125		167	302	300	301	301	304	499	500	501	499	500	1001	1005	1001	1004	1005	1509	1502	1508	1502	1503	2012	2004
168	470	456	464	483	472	783	791	780	770	779	1551	1544	1589	1582	1566	2356	2343	2342	2329	2358	3148	3111	3166	3119	3142		168	302	300	301	301	304	499	500	501	499	500	1001	1005	1001	1004	1005	1509	1502	1508	1502	1503	2012	2004
169	471	457	465	484	472	786	793	780	771	781	1557	1549	1595	1583	1572	2360	2348	2346	2334	2363	3154	3122	3178	3127	3148		169	302	300	301	301	304	499	500	501	499	500	1001	1005	1001	1004	1005	1509	1502	1508	1502	1503	2012	2004
170	471	457	465	484	473	788	794	780	771	782	1559	1553	1597	1585	1574	2361	2348	2348	2336	2363	3156	3124	3188	3128	3150		170	302	300	301	301	304	499	500	501	499	500	1001	1005	1001	1004	1005	1509	1502	1508	1502	1503	2012	2004
171	471	458	465	484	473	788	795	779	771	782	1560	1556	1598	1589	1575	2364	2349	2349	2339	2363	3158	3128	3189	3127	3155		171	302	300	301	301	304	499	500	501	499	500	1001	1005	1001	1004	1005	1509	1502	1508	1502	1503	2012	2004
172	475	462	471	485	477	792	799	786	776	791	1569	1569	1612	1602	1597	2379	2371	2373	2353	2375	3178	3142	3209	3149	3181		172	302	300	301	301	304	499	500	501	499	500	1001	1005	1001	1004	1005	1509	1502	1508	1502	1503	2012	2004
173	477	462	472	485	478	793	799	787	777	791	1571	1570	1614	1603	1599	2381	2377	2376	2355	2378	3184	3148	3210	3155	3187		173	302	300	301	301	304	499	500	501	499	500	1001	1005	1001	1004	1005	1509	1502	1508	1502	1503	2012	2004
174	477	463	474	485	478	794	798	787	780	792	1574	1572	1614	1603	1601	2382	2382	2380	2357	2381	3188	3152	3217	3157	3191		174	302	300	301	301	304	499	500	501	499	500	1001	1005	1001	1004	1005	1509	1502	1508	1502	1503	2012	2004
175	477	463	475	485	479	795	799	787	782	793	1573	1574	1620	1604	1601	2387	2385	2391	2358	2382	3194	3153	3220	3163	3191		175	302	300	301	301	304	499	500	501	499	500	1001	1005	1001	1004	1005	1509	1502	1508	1502	1503	2012	2004
176	477	463	475	485	481	799	799	788	783	794	1576	1577	1622	1604	1602	2390	2391	2393	2359	2384	3197	3156	3224	3166	3191		176	302	300	301	301	304	499	500	501	499	500	1001	1005	1001	1004	1005	1509	1502	1508	1502	1503	2012	2004
177	479	463	477	485	485	800	802	790	783	798	1578	1579	1624	1608	1606	2393	2398	2395	2364	2394	3207	3167	3234	3178	3197		177	302	300	301	301	304	499	500	501	499	501	1001	1005	1001	1004	1005	1509	1502	1509	1502	1503	2012	2004
178	480	465	485	487	490	803	803	799	787	799	1587	1586	1633	1616	1610	2406	2406	2408	2372	2408	3213	3185	3252	3189	3208		178	302	300	301	301	304	499	500	501	499	501	1001	1005	1001	1004	1005	1509	1502	1509	1502	1503	2012	2004
179	480	466	486	489	492	804	807	800	789	804	1589	1588	1636	1619	1613	2413	2411	2416	2374	2410	3223	3196	3262	3197	3215		179	302	300	301	301	304	499	500	501	499	501	1001	1005	1001	1004	1005	1509	1502	1509	1502	1503	2012	2004
180	481	466	486	492	494	808	809	803	793	809	1594	1590	1642	1623	1617	2418	2420	2422	2380	2416	3237	3206	3272	3211	3227		180	302	300	301	301	304	499	500	501	499	501	1001	1005	1001	1004	1005	1509	1502	1509	1502	1503	2012	2004
181	483	467	486	495	494	811	811	805	795	811	1596	1599	1643	1625	1621	2422	2423	2427	2387	2424	3244	3217	3281	3218	3236		181	302	300	301	302	305	499	500	501	500	501	1001	1005	1001	1005	1006	1510	1502	1509	1502	1504	2013	2004
182	484	468	487	498	495	811	815	807	795	812	1604	1602	1646	1629	1626	2434	2428	2439	2392	2432	3254	3224	3297	3230	3239		182	302	300	301	302	305	499	500	501	500	501	1001	1005	1001	1005	1006	1510	1502	1509	1502	1504	2013	2004
183	488	473	490	502	499	818	818	811	804	818	1610	1618	1663	1646	1636	2452	2446	2460	2420	2453	3275	3252	3319	3260	3265		183	302	300	301	302	305	499	500	502	500	501	1001	1005	1001	1005	1006	1510	1502	1509	1502	1504	2014	2004
184	493	474	493	503	500	820	819	812	807	821	1617	1622	1665	1648	1638	2461	2450	2466	2432	2463	3281	3259	3327	3270	3280		184	302	300	301	302	305	499	500	502	500	501	1001	1005	1001	1005	1006	1510	1502	1509	1502	1504	2014	2004
185	494	475	494	507	503	820	822	814	808	821	1626	1629	1669	1658	1641	2467	2459	2471	2440	2474	3290	3268	3341	3277	3289		185	302	300	301	302	305	499	500	502	500	501	1001	1005	1001	1005	1006	1510	1502	1509	1502	1504	2014	2004
186	495	478	495	507	505	822	823	815	807	824	1632	1636	1673	1663	1648	2473	2467	2479	2445	2478	3298	3281	3357	3286	3297		186	302	300	301	302	305	499	500	502	500	501	1001	1005	1001	1005	1006	1510	1502	1509	1502	1504	2014	2004
187	496	481	498	511	508	828	825	820	814	827	1639	1642	1679	1672	1652	2490	2481	2492	2453	2485	3310	3304	3386	3297	3314		187	302	300	301	302	305	499	500	502	500	501	1001	1005	1001	1005	1006	1510	1502	1509	1502	1504	2014	2004
188	497	484	499	512	508	828	827	824	814	828	1642	1645	1681	1676	1656	2492	2487	2494	2456	2489	3316	3308	3391	3300	3319		188	302	300	301	302	305	499	500	502	500	501	1001	1005	1001	1005	1006	1510	1504	1509	1502	1504	2014	2004
189	498	484	501	519	509	830	828	824	817	829	1652	1651	1686	1681	1664	2496	2498	2498	2462	2497	3326	3314	3400	3309	3330		189	302	300	301	302	305	499	500	502	500	501	1001	1005	1001	1005	1006	1510	1504	1509	1502	1504	2014	2004
190	499	486	501	523	513	832	838	826	825	834	1658	1660	1700	1683	1672	2509	2514	2512	2474	2507	3343	3325	3421	3325	3350		190	302	300	301	302	305	499	500	502	500	501	1001	1005	1001	1005	1006	1510	1504	1509	1502	1504	2014	2004
191	501	490	501	523	517	837	841	829	826	836	1664	1667	1705	1688	1678	2513	2522	2519	2486	2517	3354	3337	3428	3338	3358		191	302	300	301	302	305	499	500	502	500	501	1001	1005	1001	1005	1006	1510	1504	1509	1502	1504	2014	2004
192	502	491	503	523	517	837	844	829	826	837	1667	1671	1709	1691	1682	2517	2527	2522	2490	2523	3363	3344	3433	3348	3365		192	302	300	301	302	305	499	500	502	500	501	1001	1005	1001	1005	1006	1510	1504	1509	1502	1504	2014	2004
193	502	491	503	526	518	837	846	832	826	839	1669	1673	1710	1693	1685	2519	2531	2525	2496	2524	3368	3349	3438	3353	3371		193	302	300	301	302	305	499	500	502	500	501	1001	1005	1001	1005	1006	1510	1504	1509	1501	1504	2014	2004
194	502	493	504	527	519	838	849	832	827	840	1670	1677	1714	1693	1689	2522	2539	2530	2506	2526	3376	3354	3445	3365	3381		194	302	300	301	302	305	499	500	502	500	501	1001	1005	1001	1005	1005	1510	1504	1509	1502	1504	2014	2004
195	502	495	507	530	523	841	850	833	829	845	1673	1685	1715	1698	1701	2533	2554	2539	2517	2541	3392	3374	3458	3374	3398		195	302	300	301	302	305	499	500	502	500	501	1001	1005	1001	1005	1005	1510	1504	1509	1502	1504	2014	2004
196	504	500	514	532	524	846	854	837	834	849	1681	1693	1723	1704	1709	2547	2573	2555	2539	2548	3414	3387	3471	3397	3410		196	302	300	301	302	305	499	500	502	500	501	1001	1005	1001	1005	1005	1510	1504	1509	1502	1504	2014	2004
197	507	500	514	533	526	846	861	839	837	852	1696	1693	1731	1713	1715	2557	2577	2566	2553	2555	3425	3401	3484	3408	3419		197	302	300	301	302	305	499	500	502	499	501	1001	1004	1001	1005	1005	1510	1503	1509	1502	1505	2014	2002
198	507	500	519	534	526	850	862	840	839	855	1702	1697	1739	1716	1720	2559	2582	2570	2558	2561	3428	3407	3493	3418	3427		198	302	300	301	303	305	500	500	503	500	502	1001	1005	1004	1006	1006	1513	1505	1512	1504	1505	2017	2004
199	509	501	521	537	528	852	869	845	843	862	1709	1708	1748	1724	1730	2572	2595	2584	2574	2577	3451	3422	3508	3430	3436		199	302	300	301	303	305	500	500	503	500	502	1001	1005	1004	1006	1006	1513	1505	1512	1504	1505	2017	2004
200	510	501	524	539	529	854	872	847	843	862	1710	1711	1749	1729	1730	2576	2601	2589	2577	2582	3455	3430	3512	3436	3447		200	302	300	301	303	305	500	500	503	500	502	1001	1005	1004	1006	1006	1513	1505	1512	1504	1505	2017	2004
201	511	501	525	539	530	859	875	847	844	863	1713	1716	1754	1731	1732	2581	2608	2594	2581	2590	3461	3438	3515	3441	3454		201	302	300	301	303	305	500	500	503	500	502	1001	1005	1004	1006	1006	1513	1505	1512	1504	1505	2017	2004
202	514	502	529	541	533	862	877	846	845	867	1719	1723	1760	1741	1739	2588	2619	2607	2591	2600	3473	3450	3530	3453	3471		202	302	300	301	303	305	500	500	503	500	502	1001	1005	1004	1006	1006	1513	1505	1512	1504	1506	2017	2004
203	515	503	530	542	532	863	879	848	845	868	1725	1729	1762	1743	1742	2593	2623	2614	2600	2604	3481	3457	3536	3457	3476		203	302	300	301	303	305	500	500	503	500	502	1001	1005	1004	1006	1006	1513	1505	1512	1504	1506	2017	2004
204	517	504	534	543	534	865	884	854	846	870	1728	1733	1768	1748	1751	2603	2634	2626	2609	2610	3488	3461	3552	3466	3490		204	302	300	301	303	305	500	500	503	500	502	1001	1005	1004	1006	1006	1513	1505	1512	1504	1506	2018	2004
205	521	505	534	543	534	866	886	855	846	870	1729	1735	1769	1750	1756	2608	2638	2634	2613	2612	3493	3467	3563	3473	3500		205	302	300	301	303	305	500	500	503	500	502	1001	1005	1004	1006	1006	1513	1505	1512	1504	1506	2018	2004
206	522	505	537	550	537	869	891	856	849	874	1735	1742	1772	1753	1763	2616	2643	2642	2625	2617	3507	3478	3580	3483	3516		206	302	300	301	303	305	500	500	503	500	502	1001	1005	1004	1006	1006	1513	1505	1512	1504	1506	2018	2004
207	522	508	539	551	538	872	897	860	850	875	1742	1749	1781	1759	1767	2624	2654	2649	2637	2626	3526	3486	3594	3490	3534		207	302	300	301	303	305	500	500	503	500	502	1001	1005	1004	1006	1006	1513	1505	1512	1504	1506	2018	2004
208	522	508	541	552	540	873	897	860	850	875	1743	1750	1784	1762	1769	2630	2658	2654	2641	2632	3536	3489	3604	3497	3539		208	302	300	301	305	305	500	500	503	500	502	1001	1005	1004	1006	1006	1513	1505	1512	1504	1506	2018	2004
209	522	508	543	553	541	874	897	861	851	876	1745	1754	1789	1772	1773	2636	2661	2658	2643	2633	3540	3497	3614	3506	3547		209	302	300	301	305	305	500	500	503	500	502	1001	1005	1004	1006	1006	1513	1505	1512	1504	1506	2018	2004
210	525	510	543	554	544	878	902	863	852	879	1750	1767	1799	1777	1776	2651	2670	2667	2658	2644	3556	3509	3627	3518	3556		210	302	300	301	305	305	500	500	503	500	502	1001	1005	1004	1006	1006	1513	1505	1512	1504	1506	2018	2004
211	527	511	545	556	545	881	905	863	856	880	1757	1770	1801	1783	1779	2656	2674	2674	2666	2650	3564	3514	3634	3524	3559		211	302	300	301	305	305	500	500	503	500	502	1001	1005	1004	1006	1006	1513	1505	1512	1504	1506	2018	2004
212	529	512	546	557	547	881	909	864	858	885	1759	1773	1807	1786	1781	2657	2678	2678	2671	2659	3572	3521	3641	3530	3569		212	302	300	301	305	305	500	500	503	500	502	1002	1005	1004	1006	1006	1513	1505	1512	1504	1507	2019	2004
213	529	514	547	557	549	885	910	866	859	886	1761	1777	1808	1793	1785	2663	2685	2680	2676	2665	3577	3532	3645	3535	3579		213	302	300	301	305	305	500	500	503	500	502	1002	1005	1004	1006	1006	1513	1505	1512	1504	1507	2019	2004
214	529	515	548	557	553	889	913	866	860	891	1763	1782	1812	1798	1788	2667	2691	2690	2682	2668	3586	3540	3655	3538	3581		214	302	300	301	305	305	500	500	503	500	502	1002	1005	1004	1006	1006	1513	1505	1512	1504	1507	2019	2004
215	532	517	549	558	557	891	914	867	860	892	1763	1789	1814	1801	1792	2676	2697	2700	2687	2677	3594	3548	3666	3547	3590		215	302	300	301	305	305	500	500	503	500	502	1002	1005	1004	1007	1006	1513	1506	1512	1504	1507	2019	2004
216	533	519	554	561	561	891	915	868	861	893	1766	1793	1822	1805	1800	2681	2702	2708	2695	2688	3602	3556	3677	3554	3596		216	302	300	301	305	305	500	500	503	500	502	1002	1005	1004	1007	1006	1513	1506	1512	1504	1507	2019	2004
217	534	521	555	563	563	893	918	871	866	896	1775	1795	1832	1817	1806	2692	2710	2719	2705	2701	3620	3566	3688	3568	3612		217	302	301	301	305	305	500	500	503	500	502	1002	1005	1004	1007	1006	1513	1506	1512	1504	1507	2020	2004
218	537	524	557	564	564	895	922	872	869	902	1781	1799	1834	1820	1811	2700	2722	2728	2720	2712	3630	3583	3696	3574	3620		218	302	301	301	305	305	500	500	503	500	502	1002	1005	1004	1007	1006	1513	1506	1512	1504	1507	2020	2004
219	539	527	563	565	565	899	928	875	875	905	1789	1815	1843	1827	1821	2716	2731	2748	2726	2720	3656	3606	3715	3587	3633		219	302	301	301	305	305	500	500	503	500	502	1002	1005	1004	1007	1006	1513	1506	1512	1504	1507	2020	2004
220	541	528	567	566	568	899	932	875	880	911	1794	1822	1849	1832	1830	2732	2749	2761	2736	2732	3667	3625	3727	3600	3652		220	302	301	301	305	306	500	500	503	500	502	1002	1006	1004	1007	1006	1513	1507	1512	1504	1507	2021	2004
221	543	531	568	569	570	901	932	876	881	913	1801	1828	1855	1835	1836	2737	2757	2766	2742	2734	3672	3629	3732	3612	3663		221	302	301	301	305	306	500	500	503	500	502	1002	1007	1004	1007	1006	1513	1507	1513	1504	1507	2022	2004
222	545	531	571	569	569	901	933	876	884	913	1807	1835	1858	1841	1844	2741	2761	2776	2752	2739	3678	3635	3737	3620	3671		222	302	301	301	305	306	500	500	503	500	502	1002	1007	1004	1007	1006	1513	1507	1513	1504	1507	2022	2004
223	546	533	574	571	572	902	936	880	889	916	1811	1842	1866	1847	1849	2748	2767	2786	2763	2755	3698	3646	3745	3635	3683		223	302	301	301	305	306	500	500	503	500	502	1002	1007	1004	1007	1005	1512	1507	1513	1504	1507	2021	2004
224	548	537	577	571	575	907	940	882	895	916	1819	1850	1873	1854	1858	2757	2779	2806	2775	2775	3723	3657	3763	3655	3695		224	302	301	301	305	306	500	500	503	502	502	1003	1008	1004	1007	1008	1515	1509	1514	1504	1511	2023	2006
225	551	538	579	574	576	908	943	885	897	918	1828	1855	1881	1866	1862	2769	2792	2815	2787	2778	3741	3670	3784	3673	3708		225	302	301	301	305	306	500	500	503	502	502	1003	1008	1004	1007	1008	1515	1509	1514	1504	1511	2023	2006
226	552	540	579	575	578	910	949	889	897	920	1833	1862	1887	1872	1866	2780	2804	2822	2796	2792	3750	3687	3795	3689	3720		226	302	301	301	305	306	500	500	503	502	502	1003	1008	1003	1007	1008	1515	1509	1514	1504	1511	2023	2006
227	554	540	580	575	578	916	953	893	901	925	1844	1869	1895	1880	1872	2796	2822	2832	2818	2815	3762	3702	3809	3702	3738		227	302	301	301	305	306	500	500	503	502	502	1003	1008	1003	1007	1008	1515	1509	1514	1504	1511	2023	2006
228	557	542	582	578	583	923	959	898	911	926	1863	1873	1902	1888	1881	2807	2837	2844	2836	2831	3783	3726	3824	3727	3760		228	302	301	301	305	306	500	500	503	502	502	1003	1008	1003	1007	1008	1515	1509	1514	1504	1511	2023	2006
229	560	545	583	583	584	930	960	900	914	928	1872	1882	1905	1892	1892	2824	2848	2859	2847	2839	3793	3738	3847	3751	3770		229	302	301	301	305	306	500	500	503	502	502	1003	1008	1003	1007	1008	1515	1509	1514	1504	1511	2023	2006
230	563	546	586	585	587	930	962	901	914	930	1874	1886	1912	1896	1898	2834	2851	2870	2851	2847	3799	3750	3859	3762	3779		230	302	301	301	305	306	500	500	503	502	502	1003	1008	1003	1007	1008	1515	1509	1514	1504	1511	2022	2006
231	567	548	590	587	589	932	962	902	916	934	1880	1892	1917	1902	1901	2837	2856	2876	2857	2855	3812	3759	3864	3775	3786		231	302	301	301	305	306	500	500	503	502	502	1003	1008	1003	1007	1008	1515	1509	1514	1504	1511	2022	2006
232	567	550	592	588	591	935	963	904	919	935	1884	1897	1919	1906	1905	2841	2861	2884	2866	2859	3825	3762	3872	3781	3794		232	302	301	301	305	306	500	500	503	502	502	1003	1008	1003	1007	1008	1515	1509	1513	1504	1511	2021	2005
233	570	552	595	591	591	939	968	907	921	941	1883	1904	1925	1913	1910	2847	2868	2889	2875	2875	3834	3770	3877	3792	3800		233	302	301	303	305	307	500	500	503	502	502	1003	1008	1004	1008	1009	1516	1509	1513	1505	1512	2023	2006
234	572	554	599	595	595	942	969	912	925	947	1890	1906	1930	1924	1914	2854	2875	2897	2884	2887	3843	3786	3895	3811	3814		234	302	301	303	305	307	500	500	503	502	502	1003	1008	1004	1008	1009	1516	1509	1513	1505	1511	2023	2006
235	573	555	602	597	596	945	971	916	929	949	1893	1914	1937	1928	1923	2864	2881	2903	2890	2889	3853	3799	3911	3821	3818		235	302	301	303	305	307	500	500	503	502	502	1003	1008	1004	1008	1009	1516	1509	1513	1505	1511	2023	2006
236	575	556	607	599	596	949	976	924	933	955	1901	1924	1948	1941	1929	2884	2897	2920	2903	2903	3869	3822	3924	3839	3836		236	302	301	303	305	307	500	500	503	502	502	1003	1008	1004	1008	1009	1516	1509	1513	1505	1511	2023	2006
237	576	557	608	600	596	952	981	931	933	959	1908	1927	1953	1946	1933	2890	2907	2929	2916	2912	3877	3828	3937	3853	3845		237	302	301	303	305	307	500	500	503	502	502	1003	1008	1004	1008	1009	1516	1509	1514	1505	1511	2023	2006
238	577	558	610	606	598	959	982	935	936	963	1911	1935	1958	1956	1940	2897	2914	2943	2928	2924	3893	3840	3955	3864	3859		238	302	301	303	305	308	500	500	503	502	502	1003	1008	1004	1008	1009	1517	1509	1515	1506	1511	2024	2006
239	578	560	611	606	601	968	985	941	941	970	1917	1942	1964	1967	1946	2908	2927	2953	2937	2933	3906	3853	3970	3879	3877		239	302	301	303	304	308	500	500	503	502	502	1003	1008	1004	1008	1009	1517	1509	1515	1506	1511	2024	2006
240	580	563	610	606	602	970	989	942	943	972	1927	1945	1967	1975	1951	2915	2937	2965	2945	2940	3912	3865	3978	3893	3887		240	302	301	303	304	308	501	500	503	502	502	1003	1008	1004	1008	1009	1517	1509	1516	1506	1511	2024	2006
241	582	564	612	606	605	973	990	942	945	972	1931	1950	1971	1979	1955	2925	2944	2973	2948	2945	3921	3873	3991	3906	3903		241	302	301	303	304	308	501	500	503	502	502	1003	1008	1004	1008	1009	1517	1509	1516	1506	1511	2024	2006
242	582	565	615	609	605	978	993	946	946	976	1936	1959	1979	1981	1960	2933	2951	2982	2958	2950	3931	3881	3998	3916	3912		242	302	301	303	304	308	501	501	503	502	502	1003	1008	1004	1008	1011	1518	1509	1516	1507	1511	2024	2006
243	585	567	615	609	605	979	995	948	947	977	1941	1968	1987	1986	1966	2938	2959	2989	2966	2955	3939	3890	4005	3924	3916		243	302	301	303	304	308	501	501	503	502	502	1003	1008	1004	1008	1011	1518	1509	1516	1507	1511	2024	2006
244	587	570	618	614	608	986	1000	951	954	984	1956	1979	1997	1995	1974	2963	2975	3006	2981	2975	3966	3911	4038	3938	3943		244	302	301	303	304	308	501	501	503	502	502	1003	1008	1004	1008	1011	1518	1509	1516	1507	1511	2024	2006
245	588	572	621	619	610	989	1005	954	958	990	1966	1987	2005	2003	1983	2976	2979	3017	2990	2992	3981	3919	4045	3947	3954		245	303	301	303	304	308	501	501	503	502	502	1003	1008	1004	1008	1011	1520	1509	1518	1507	1511	2023	2006
246	591	576	622	620	614	991	1008	955	961	992	1973	1988	2010	2011	1991	2979	2993	3024	2996	3000	3990	3933	4054	3956	3961		246	303	301	303	304	308	501	501	503	502	502	1003	1008	1004	1008	1011	1520	1509	1518	1507	1511	2023	2006
247	594	576	622	619	614	996	1009	956	965	998	1979	1992	2015	2015	1995	2985	2998	3032	3002	3012	3996	3945	4060	3966	3967		247	303	301	303	304	308	501	501	504	502	502	1003	1008	1004	1008	1011	1520	1509	1518	1507	1511	2024	2006
248	595	578	624	619	614	998	1009	957	967	999	1984	1997	2019	2018	2000	2991	3001	3045	3012	3018	4001	3951	4068	3982	3974		248	303	301	303	304	308	501	501	504	502	502	1003	1008	1004	1008	1012	1520	1509	1518	1509	1511	2025	2006
249	597	579	626	620	616	1000	1011	957	968	1000	1986	2005	2023	2025	2004	2995	3011	3055	3017	3023	4006	3962	4080	3992	3987		249	303	301	303	304	307	501	501	504	502	502	1003	1009	1004	1008	1013	1520	1509	1518	1509	1512	2025	2006
250	599	581	630	620	616	1003	1014	961	971	1001	1994	2010	2032	2031	2016	3002	3019	3066	3031	3038	4019	3969	4093	4005	3997		250	303	301	303	304	307	501	501	504	502	502	1003	1009	1004	1008	1013	1520	1509	1518	1509	1512	2025	2006
251	601	587	632	619	618	1011	1020	966	974	1002	2001	2025	2035	2033	2026	3012	3034	3076	3049	3047	4033	3982	4116	4023	4015		251	303	301	303	304	307	501	501	504	502	502	1003	1009	1004	1008	1013	1520	1509	1518	1509	1512	2025	2008
252	603	589	635	620	619	1015	1021	969	978	1004	2010	2029	2040	2049	2032	3021	3050	3088	3060	3059	4041	3998	4135	4038	4029		252	303	301	303	304	307	501	501	504	502	502	1002	1009	1004	1008	1013	1520	1509	1518	1509	1512	2025	2008
253	606	590	636	620	624	1018	1023	971	980	1012	2021	2042	2044	2054	2043	3036	3059	3099	3065	3071	4054	4021	4141	4064	4044		253	303	301	303	304	307	501	501	504	502	502	1002	1009	1004	1008	1013	1520	1509	1518	1509	1513	2025	2008
254	607	591	636	619	625	1022	1025	973	981	1015	2030	2051	2050	2067	2047	3042	3070	3106	3077	3081	4068	4041	4152	4075	4058		254	303	301	304	304	307	501	501	504	502	502	1002	1009	1004	1008	1013	1520	1509	1518	1509	1513	2025	2009
255	609	594	636	621	625	1026	1027	978	989	1017	2037	2059	2056	2074	2055	3055	3083	3123	3088	3092	4084	4057	4166	4092	4081		255	303	301	304	304	307	501	501	504	502	502	1002	1009	1004	1008	1013	1520	1509	1518	1509	1513	2026	2009
256	609	596	636	621	629	1026	1028	979	993	1018	2038	2062	2066	2082	2061	3062	3090	3136	3096	3096	4094	4068	4180	4099	4087		256	303	301	304	304	307	501	502	504	502	502	1002	1009	1004	1008	1013	1520	1509	1518	1509	1513	2025	2009
257	614	599	639	626	630	1028	1035	983	995	1022	2047	2072	2077	2089	2068	3070	3104	3150	3109	3107	4106	4083	4205	4121	4113		257	303	301	304	304	307	501	502	504	502	502	1002	1009	1004	1008	1013	1519	1509	1518	1509	1513	2025	2009
258	615	602	642	627	633	1032	1039	986	999	1032	2056	2081	2085	2100	2074	3077	3112	3168	3123	3114	4121	4096	4211	4145	4126		258	303	301	304	304	307	501	502	504	502	502	1001	1009	1004	1008	1013	1519	1509	1518	1509	1513	2025	2009
259	616	603	642	628	632	1036	1044	987	1003	1033	2059	2084	2089	2103	2080	3092	3117	3177	3132	3121	4134	4115	4215	4151	4136		259	303	301	304	304	307	501	502	504	502	502	1001	1009	1004	1008	1013	1519	1509	1518	1509	1513	2025	2009
260	623	605	644	632	636	1040	1050	996	1010	1037	2067	2091	2106	2115	2094	3108	3131	3183	3140	3135	4162	4136	4240	4175	4165		260	303	301	304	304	307	501	502	504	502	502	1001	1009	1004	1008	1013	1519	1509	1518	1509	1513	2025	2009
261	623	605	645	634	637	1044	1052	1000	1010	1041	2071	2096	2115	2124	2108	3113	3134	3193	3145	3141	4169	4140	4255	4188	4176		261	303	301	304	304	307	501	502	504	502	502	1001	1009	1004	1008	1013	1519	1509	1518	1509	1513	2025	2009
262	624	605	645	633	639	1047	1053	1008	1015	1045	2078	2100	2118	2129	2115	3121	3141	3199	3153	3156	4186	4149	4265	4199	4184		262	303	301	304	304	307	501	502	504	502	502	1001	1009	1004	1008	1013	1519	1509	1518	1509	1513	2025	2009
263	626	605	646	636	640	1051	1059	1012	1017	1050	2089	2103	2123	2134	2124	3126	3145	3208	3161	3162	4202	4159	4281	4209	4199		263	303	301	304	304	307	501	502	504	502	502	1002	1009	1004	1008	1013	1519	1509	1518	1509	1513	2025	2009
264	629	606	647	638	643	1054	1060	1015	1018	1051	2092	2108	2124	2139	2131	3132	3155	3213	3169	3171	4212	4166	4294	4221	4218		264	303	302	304	304	307	501	502	504	502	502	1002	1009	1004	1009	1014	1519	1509	1518	1509	1513	2026	2009
265	631	606	648	638	642	1056	1062	1018	1018	1052	2094	2111	2128	2141	2137	3140	3161	3222	3174	3182	4226	4174	4303	4234	4232		265	303	302	304	304	307	501	502	504	502	502	1002	1010	1004	1009	1015	1519	1508	1517	1509	1514	2026	2009
266	633	607	650	639	642	1056	1066	1022	1020	1055	2102	2116	2132	2145	2149	3154	3169	3226	3182	3189	4238	4187	4314	4246	4242		266	303	302	304	304	307	501	502	504	502	502	1002	1010	1004	1009	1015	1519	1508	1517	1510	1514	2026	2010
267	635	609	654	641	642	1058	1067	1027	1020	1059	2111	2118	2139	2149	2161	3166	3176	3239	3188	3205	4253	4196	4321	4260	4250		267	303	302	304	304	307	501	502	504	502	502	1002	1010	1004	1009	1015	1519	1508	1517	1510	1514	2026	2010
268	637	612	657	645	644	1058	1067	1031	1021	1062	2123	2124	2144	2154	2165	3174	3187	3246	3195	3209	4261	4207	4326	4271	4257		268	303	302	304	304	307	501	502	504	502	502	1002	1010	1004	1009	1015	1519	1508	1517	1510	1514	2026	2010
269	639	616	661	647	647	1063	1071	1033	1025	1067	2130	2134	2158	2166	2171	3185	3198	3257	3206	3221	4277	4227	4346	4290	4267		269	303	303	304	304	307	501	502	504	502	502	1002	1010	1004	1009	1016	1519	1508	1517	1510	1514	2026	2010
270	642	617	663	651	648	1064	1074	1034	1026	1074	2130	2138	2161	2173	2176	3190	3205	3264	3219	3227	4283	4233	4354	4304	4276		270	303	303	304	304	307	501	502	504	502	502	1002	1010	1004	1009	1016	1519	1508	1518	1510	1514	2027	2010
271	644	621	666	657	652	1066	1078	1042	1029	1080	2144	2146	2169	2181	2183	3201	3226	3274	3236	3245	4300	4251	4369	4321	4298		271	303	303	304	304	307	501	502	504	502	502	1002	1010	1004	1009	1016	1519	1508	1518	1510	1514	2027	2010
272	647	624	668	661	654	1071	1081	1045	1032	1084	2150	2155	2179	2187	2193	3213	3235	3286	3247	3252	4317	4266	4390	4339	4305		272	303	303	304	304	307	501	502	505	502	502	1002	1010	1004	1009	1016	1519	1508	1518	1511	1514	2027	2010
273	652	629	669	663	655	1074	1084	1050	1037	1088	2157	2162	2184	2193	2199	3224	3240	3295	3256	3262	4331	4278	4401	4350	4311		273	303	303	304	304	307	501	502	505	502	502	1002	1010	1004	1009	1016	1518	1508	1518	1511	1514	2027	2010
274	654	631	669	665	657	1077	1087	1052	1044	1091	2166	2169	2188	2197	2204	3235	3244	3303	3261	3268	4348	4292	4412	4357	4320		274	303	303	304	304	307	501	502	505	502	502	1002	1010	1004	1009	1016	1518	1508	1518	1511	1514	2027	2010
275	655	631	668	668	657	1078	1092	1054	1046	1094	2172	2170	2197	2201	2207	3248	3258	3311	3266	3283	4362	4308	4421	4367	4339		275	303	303	304	304	307	501	502	505	502	503	1002	1010	1004	1009	1016	1518	1508	1518	1511	1515	2029	2012
276	655	632	668	671	659	1080	1097	1056	1049	1095	2178	2176	2203	2203	2215	3256	3263	3317	3272	3292	4371	4319	4433	4382	4348		276	303	303	304	304	307	501	502	505	502	503	1002	1010	1004	1009	1016	1518	1508	1518	1511	1515	2029	2012
277	658	634	671	671	661	1082	1103	1055	1053	1100	2184	2182	2211	2212	2222	3267	3267	3326	3276	3303	4383	4338	4441	4399	4374		277	303	303	304	304	307	501	502	505	502	503	1002	1010	1004	1009	1016	1518	1507	1518	1511	1515	2029	2012
278	661	636	671	672	663	1085	1110	1057	1059	1104	2189	2187	2217	2220	2231	3276	3275	3335	3282	3318	4399	4346	4458	4414	4388		278	303	304	304	304	307	501	502	505	502	503	1002	1010	1004	1009	1016	1518	1509	1518	1511	1515	2029	2012
279	665	638	673	676	665	1089	1112	1058	1061	1107	2195	2198	2223	2233	2236	3292	3288	3344	3292	3323	4414	4363	4467	4428	4396		279	303	304	304	304	307	501	502	505	502	503	1002	1010	1004	1009	1016	1518	1509	1518	1511	1515	2029	2012
280	665	640	676	679	665	1091	1115	1060	1065	1110	2205	2203	2230	2246	2243	3298	3301	3355	3304	3336	4429	4373	4472	4440	4411		280	303	304	304	304	309	501	502	505	502	503	1002	1010	1004	1009	1017	1520	1509	1519	1511	1515	2030	2014
281	671	642	678	683	665	1095	1117	1066	1065	1112	2215	2209	2241	2255	2249	3316	3316	3372	3330	3350	4454	4397	4498	4456	4431		281	303	304	304	304	309	501	502	505	502	503	1002	1010	1004	1009	1017	1520	1509	1519	1511	1515	2030	2014
282	671	641	678	688	666	1097	1119	1067	1073	1117	2223	2215	2250	2258	2256	3323	3332	3387	3343	3357	4474	4412	4511	4474	4441		282	303	304	304	304	309	501	502	505	502	503	1002	1010	1004	1009	1017	1521	1509	1519	1511	1515	2031	2013
283	672	642	682	688	666	1100	1126	1072	1076	1118	2227	2225	2257	2267	2263	3349	3341	3393	3350	3364	4484	4424	4522	4489	4461		283	303	304	304	304	309	501	502	505	502	503	1002	1010	1004	1008	1017	1521	1509	1519	1512	1515	2030	2013
284	673	644	686	692	666	1102	1130	1078	1078	1121	2235	2234	2265	2272	2273	3360	3350	3398	3363	3378	4494	4436	4536	4500	4471		284	303	305	304	304	309	501	502	505	501	504	1003	1011	1005	1009	1017	1522	1509	1521	1511	1514	2030	2014
285	676	647	687	695	668	1108	1136	1084	1080	1124	2246	2244	2278	2279	2281	3371	3357	3406	3372	3389	4509	4449	4550	4513	4490		285	304	305	304	304	309	501	502	505	502	504	1002	1012	1005	1009	1016	1523	1510	1521	1511	1514	2030	2020
286	677	649	687	697	670	1114	1138	1090	1081	1128	2250	2251	2290	2283	2285	3381	3369	3417	3384	3401	4524	4453	4570	4523	4500		286	304	305	305	305	309	501	502	505	503	504	1003	1013	1005	1011	1015	1523	1512	1523	1512	1514	2031	2021
287	680	649	689	697	672	1115	1141	1091	1085	1134	2261	2259	2299	2289	2295	3389	3378	3424	3391	3410	4540	4473	4595	4537	4512		287	303	305	305	305	308	502	502	505	504	504	1002	1013	1006	1011	1015	1524	1512	1525	1513	1515	2031	2021
288	684	651	690	698	672	1116	1146	1093	1088	1136	2267	2265	2307	2299	2307	3394	3389	3439	3407	3417	4549	4494	4612	4551	4528		288	303	305	305	305	308	503	502	505	505	504	1002	1016	1008	1012	1017	1524	1513	1528	1515	1516	2033	2024
289	686	652	692	699	673	1120	1151	1097	1094	1142	2284	2276	2318	2310	2313	3400	3401	3455	3421	3432	4571	4516	4629	4568	4543		289	304	305	305	305	308	503	502	506	505	505	1002	1016	1008	1012	1018	1525	1513	1528	1517	1516	2035	2024
290	689	653	692	703	674	1124	1157	1102	1099	1147	2295	2285	2325	2321	2315	3415	3410	3466	3433	3441	4585	4544	4643	4584	4557		290	304	305	306	305	308	503	502	506	505	505	1003	1015	1011	1013	1021	1524	1513	1530	1517	1515	2038	2024
291	691	656	695	705	677	1125	1161	1108	1110	1149	2305	2288	2332	2331	2322	3426	3414	3478	3442	3452	4605	4565	4657	4598	4571		291	304	305	307	306	308	503	502	506	505	506	1003	1015	1010	1013	1021	1524	1514	1530	1519	1515	2039	2024
292	693	657	700	706	679	1130	1162	1110	1117	1151	2308	2295	2341	2338	2331	3435	3427	3486	3453	3468	4623	4577	4678	4615	4586		292	304	305	307	306	308	503	502	506	506	506	1004	1016	1012	1014	1022	1525	1516	1532	1520	1515	2041	2027
293	694	660	701	708	680	1136	1166	1114	1125	1156	2313	2303	2351	2348	2339	3445	3435	3500	3461	3481	4639	4595	4698	4628	4614		293	304	305	307	306	308	503	502	506	506	507	1005	1016	1012	1014	1022	1527	1517	1532	1522	1518	2040	2029
294	696	661	706	709	683	1137	1169	1115	1126	1158	2320	2311	2357	2356	2348	3457	3448	3511	3469	3494	4654	4602	4712	4640	4628		294	304	306	307	306	309	503	503	506	507	507	1005	1017	1016	1014	1024	1527	1520	1532	1523	1519	2042	2031
295	702	663	709	712	688	1141	1172	1121	1130	1164	2330	2323	2366	2368	2358	3478	3468	3525	3486	3501	4677	4633	4735	4668	4649		295	304	306	307	305	310	503	503	506	506	507	1005	1017	1016	1014	1024	1527	1522	1533	1523	1521	2047	2033
296	705	665	710	717	691	1147	1178	1125	1134	1171	2336	2328	2375	2379	2370	3485	3483	3537	3492	3512	4693	4640	4752	4685	4666		296	304	306	307	305	310	503	503	506	506	507	1005	1017	1018	1016	1025	1530	1523	1535	1524	1523	2049	2035
297	708	669	714	719	695	1150	1181	1126	1138	1177	2342	2336	2378	2383	2385	3497	3494	3549	3498	3517	4709	4657	4767	4705	4681		297	303	306	306	305	310	503	504	506	506	507	1005	1018	1018	1016	1025	1531	1523	1534	1525	1523	2050	2037
298	714	669	716	722	695	1154	1186	1127	1142	1181	2347	2344	2389	2393	2393	3506	3509	3565	3511	3531	4720	4672	4782	4723	4695		298	303	306	306	305	310	503	505	506	506	507	1006	1018	1018	1018	1026	1532	1525	1536	1524	1523	2052	2041
299	715	670	718	721	696	1157	1187	1129	1145	1185	2351	2359	2397	2398	2399	3525	3518	3581	3526	3548	4744	4690	4799	4745	4712		299	303	306	306	305	311	505	505	506	506	506	1006	1018	1017	1017	1026	1533	1526	1535	1525	1525	2052	2045
300	719	671	719	724	699	1161	1199	1133	1150	1188	2360	2366	2404	2408	2405	3532	3531	3585	3543	3557	4750	4694	4819	4762	4726		300	303	306	307	306	311	505	506	507	505	506	1007	1018	1017	1019	1029	1534	1527	1534	1529	1525	2055	2044
301	720	672	722	727	704	1168	1202	1141	1154	1196	2370	2370	2409	2422	2414	3543	3543	3601	3551	3566	4763	4713	4839	4777	4739		301	303	306	307	306	313	505	506	509	505	507	1007	1016	1017	1019	1029	1534	1527	1534	1534	1526	2057	2045
302	725	673	723	729	706	1171	1207	1143	1155	1199	2376	2377	2419	2429	2422	3555	3557	3612	3568	3577	4783	4724	4855	4799	4756		302	304	307	307	306	313	505	506	509	505	507	1008	1017	1017	1020	1032	1537	1526	1536	1535	1527	2057	2045
303	726	678	724	734	709	1180	1211	1151	1157	1202	2386	2385	2431	2434	2437	3564	3569	3626	3576	3595	4799	4744	4871	4815	4768		303	304	307	307	306	313	505	505	509	505	507	1008	1017	1017	1020	1032	1537	1526	1535	1534	1527	2058	2046
304	728	679	725	739	712	1187	1216	1157	1160	1205	2402	2392	2444	2446	2451	3578	3582	3641	3589	3611	4816	4762	4883	4840	4787		304	305	307	307	307	315	505	505	512	505	507	1012	1017	1018	1020	1032	1538	1527	1535	1535	1529	2058	2046
305	730	682	727	743	716	1192	1217	1162	1166	1207	2408	2399	2458	2449	2460	3591	3593	3654	3600	3619	4825	4784	4900	4856	4804		305	305	307	309	307	315	505	505	513	505	507	1012	1017	1018	1020	1032	1538	1527	1535	1537	1531	2060	2047
306	730	685	732	745	717	1197	1218	1168	1169	1210	2415	2408	2469	2456	2470	3608	3608	3659	3614	3628	4838	4806	4924	4873	4822		306	305	307	309	307	316	506	505	515	505	508	1013	1016	1020	1023	1035	1539	1529	1538	1537	1531	2062	2050
307	732	688	735	749	720	1202	1224	1170	1175	1213	2427	2416	2487	2467	2482	3623	3621	3676	3624	3640	4852	4829	4948	4901	4837		307	305	307	309	307	316	506	506	515	505	510	1012	1016	1020	1024	1035	1541	1532	1538	1539	1531	2064	2050
308	738	692	741	752	725	1211	1226	1177	1180	1219	2438	2429	2496	2479	2485	3633	3635	3694	3645	3652	4874	4859	4973	4929	4854		308	305	306	309	308	316	506	507	514	505	510	1014	1018	1022	1025	1036	1542	1535	1538	1541	1531	2063	2050
309	739	692	745	753	726	1214	1227	1184	1182	1221	2447	2436	2509	2489	2497	3644	3645	3706	3658	3669	4889	4875	4982	4944	4874		309	305	306	309	308	316	506	507	514	505	511	1014	1019	1023	1025	1036	1543	1534	1540	1542	1534	2064	2049
310	742	696	748	758	730	1219	1231	1193	1187	1224	2452	2439	2522	2494	2502	3657	3654	3715	3676	3683	4919	4897	4995	4961	4899		310	306	306	310	308	316	506	507	514	505	511	1017	1020	1023	1026	1037	1546	1534	1542	1544	1538	2063	2052
311	742	696	751	762	737	1221	1233	1195	1193	1226	2468	2445	2526	2504	2508	3674	3670	3731	3697	3691	4940	4916	5013	4980	4920		311	306	307	311	308	316	506	508	514	505	510	1017	1022	1022	1026	1037	1548	1535	1542	1544	1539	2063	2053
312	742	698	753	764	738	1225	1238	1201	1205	1226	2474	2449	2534	2515	2516	3682	3682	3739	3704	3702	4957	4933	5026	4997	4939		312	306	307	311	308	316	506	508	514	505	511	1017	1023	1023	1027	1037	1550	1535	1540	1544	1542	2062	2054
313	744	701	754	764	740	1230	1241	1206	1209	1230	2483	2457	2540	2522	2521	3698	3688	3750	3713	3716	4972	4950	5042	5013	4954		313	307	307	311	308	316	506	508	514	506	512	1017	1023	1022	1027	1037	1552	1536	1539	1546	1542	2065	2055
314	746	704	758	768	744	1234	1247	1210	1215	1237	2490	2467	2553	2530	2529	3713	3700	3762	3732	3732	4992	4973	5052	5024	4974		314	307	307	311	308	316	506	509	515	506	512	1019	1024	1024	1029	1038	1552	1536	1540	1549	1542	2065	2056
315	748	704	761	774	747	1241	1253	1215	1221	1244	2497	2480	2567	2537	2539	3725	3714	3773	3736	3741	5011	4989	5068	5040	4982		315	307	307	311	308	317	506	508	515	506	513	1019	1024	1024	1029	1038	1553	1537	1542	1547	1541	2066	2058
316	749	705	761	775	749	1247	1257	1218	1228	1250	2504	2486	2579	2542	2554	3733	3730	3785	3751	3757	5031	5003	5093	5055	4999		316	307	307	311	308	318	506	508	516	506	512	1019	1025	1026	1031	1038	1552	1539	1543	1547	1543	2068	2059
317	758	709	762	777	749	1252	1261	1221	1233	1254	2507	2501	2592	2551	2561	3752	3743	3803	3764	3765	5049	5013	5118	5074	5014		317	308	307	311	308	318	506	508	516	506	512	1019	1025	1025	1031	1038	1552	1540	1545	1549	1547	2068	2061
318	760	711	764	778	753	1257	1264	1225	1236	1254	2512	2506	2604	2559	2562	3768	3755	3814	3777	3779	5065	5038	5132	5088	5023		318	308	307	312	308	318	506	508	516	507	512	1020	1027	1025	1032	1037	1553	1541	1547	1549	1548	2071	2061
319	763	711	764	782	759	1259	1270	1232	1243	1259	2520	2513	2610	2565	2570	3780	3770	3824	3792	3792	5085	5053	5141	5101	5042		319	307	307	312	308	318	507	508	516	506	512	1020	1027	1025	1033	1037	1554	1542	1546	1552	1548	2074	2063
320	766	712	767	786	762	1263	1272	1236	1248	1267	2527	2522	2625	2575	2578	3794	3790	3835	3812	3808	5101	5070	5158	5118	5061		320	307	307	312	308	318	507	508	516	507	512	1020	1029	1026	1033	1037	1556	1541	1546	1555	1550	2074	2063
321	770	716	770	789	766	1268	1273	1245	1257	1275	2540	2536	2635	2586	2583	3813	3815	3853	3831	3826	5125	5088	5185	5138	5087		321	307	307	311	309	318	508	508	516	508	513	1020	1029	1026	1033	1038	1557	1544	1546	1555	1550	2074	2065
322	773	719	774	792	770	1271	1273	1249	1260	1278	2554	2544	2652	2593	2591	3828	3829	3868	3844	3840	5140	5108	5199	5156	5104		322	307	306	311	309	318	509	509	515	508	513	1021	1031	1026	1034	1040	1558	1544	1549	1556	1551	2076	2065
323	779	722	774	796	773	1276	1281	1252	1264	1282	2563	2551	2662	2607	2600	3841	3843	3881	3858	3855	5152	5119	5220	5171	5119		323	307	306	311	309	318	509	510	515	510	513	1021	1031	1026	1034	1040	1559	1544	1550	1556	1553	2077	2065
324	782	725	778	799	776	1280	1286	1255	1267	1287	2572	2563	2671	2615	2607	3857	3860	3897	3880	3867	5169	5134	5239	5197	5132		324	307	306	311	309	318	509	511	516	510	513	1023	1032	1028	1033	1040	1559	1547	1552	1556	1553	2079	2066
325	786	728	780	803	779	1285	1291	1263	1270	1291	2581	2573	2681	2621	2609	3867	3869	3911	3899	3879	5180	5148	5253	5210	5149		325	307	306	311	309	318	509	511	516	510	513	1024	1033	1028	1033	1041	1561	1548	1552	1556	1555	2081	2067
326	789	731	784	813	782	1291	1300	1267	1273	1300	2591	2585	2691	2638	2624	3884	3890	3931	3913	3900	5201	5172	5277	5238	5178		326	307	306	311	309	318	510	511	516	510	513	1026	1033	1029	1033	1042	1559	1549	1553	1557	1557	2085	2068
327	791	733	784	814	784	1297	1307	1274	1278	1304	2604	2596	2701	2647	2641	3905	3906	3951	3924	3924	5213	5194	5299	5264	5202		327	307	305	311	310	320	510	511	515	513	513	1026	1033	1029	1033	1043	1559	1548	1556	1560	1560	2087	2068
328	794	736	785	822	785	1302	1314	1274	1285	1308	2614	2609	2714	2659	2652	3925	3920	3964	3933	3933	5223	5204	5324	5283	5221		328	308	305	311	310	320	510	512	515	513	513	1027	1036	1031	1034	1044	1560	1547	1557	1561	1563	2088	2070
329	800	737	786	824	788	1306	1316	1277	1290	1313	2624	2625	2723	2664	2660	3933	3931	3976	3942	3953	5241	5233	5340	5299	5236		329	309	305	311	310	320	510	512	516	513	513	1027	1036	1030	1035	1044	1562	1547	1558	1561	1562	2089	2071
330	801	739	791	829	788	1308	1319	1280	1296	1324	2628	2641	2735	2680	2666	3951	3945	3991	3962	3965	5258	5247	5364	5315	5260		330	309	305	311	310	320	510	513	515	513	513	1029	1036	1031	1038	1044	1564	1548	1558	1565	1564	2090	2071
331	802	746	794	832	791	1315	1323	1281	1299	1332	2642	2648	2746	2688	2677	3970	3963	4002	3975	3984	5279	5270	5383	5335	5294		331	310	305	312	311	319	511	513	515	513	512	1028	1036	1031	1038	1044	1564	1550	1559	1567	1567	2091	2071
332	805	749	797	838	795	1321	1331	1286	1303	1337	2647	2658	2754	2706	2685	3989	3977	4021	3988	3997	5308	5290	5412	5356	5316		332	309	306	311	311	319	510	513	516	514	513	1028	1036	1031	1041	1046	1564	1551	1560	1567	1567	2093	2072
333	809	752	801	841	797	1324	1334	1291	1308	1342	2655	2671	2768	2711	2695	3998	3995	4038	4004	4016	5332	5303	5433	5367	5343		333	309	306	311	311	319	510	513	516	514	514	1028	1035	1031	1042	1046	1564	1551	1560	1566	1567	2096	2076
334	812	757	805	844	800	1326	1337	1294	1310	1344	2661	2678	2783	2715	2706	4014	4015	4048	4013	4026	5349	5321	5450	5382	5369		334	309	306	311	312	319	510	512	514	514	514	1031	1036	1031	1043	1048	1565	1551	1560	1566	1567	2097	2077
335	818	757	809	844	802	1331	1341	1301	1313	1349	2671	2694	2796	2721	2714	4029	4033	4062	4025	4041	5362	5349	5469	5397	5389		335	309	306	311	312	319	510	513	514	514	515	1031	1036	1030	1043	1048	1566	1553	1562	1566	1569	2099	2078
336	822	759	811	846	806	1334	1344	1307	1320	1352	2680	2700	2805	2730	2724	4040	4051	4070	4048	4053	5393	5375	5481	5419	5400		336	310	307	311	312	319	510	513	514	514	515	1035	1038	1031	1043	1049	1567	1553	1561	1569	1569	2101	2078
337	826	764	815	849	808	1343	1347	1311	1324	1358	2687	2705	2816	2742	2732	4053	4065	4081	4064	4067	5419	5403	5499	5429	5417		337	311	307	311	313	319	510	513	514	514	515	1034	1038	1031	1043	1049	1569	1554	1563	1570	1569	2101	2080
338	832	767	816	850	813	1346	1353	1315	1328	1365	2697	2713	2826	2747	2745	4067	4080	4096	4075	4082	5433	5413	5522	5449	5437		338	311	307	312	313	319	510	515	514	514	517	1034	1040	1034	1046	1049	1570	1556	1564	1571	1570	2104	2081
339	835	768	824	850	813	1354	1354	1318	1333	1370	2709	2718	2842	2754	2752	4087	4098	4113	4095	4098	5461	5433	5543	5468	5455		339	310	307	312	314	319	510	516	514	514	518	1034	1040	1034	1046	1049	1571	1557	1565	1571	1570	2107	2083
340	839	769	825	851	816	1356	1362	1326	1337	1374	2714	2731	2853	2760	2757	4103	4109	4131	4115	4111	5487	5450	5568	5481	5472		340	311	308	313	314	320	509	517	514	513	518	1037	1040	1035	1046	1051	1571	1560	1568	1573	1571	2106	2083
341	841	770	827	853	822	1357	1367	1328	1342	1381	2725	2740	2862	2769	2762	4123	4132	4150	4133	4127	5512	5470	5584	5504	5494		341	311	308	312	314	321	511	516	515	513	518	1034	1039	1037	1047	1051	1574	1559	1571	1575	1575	2105	2086
342	844	775	831	858	826	1362	1369	1334	1349	1385	2736	2752	2872	2776	2770	4144	4151	4171	4149	4142	5534	5489	5601	5527	5519		342	311	308	312	314	322	511	516	515	513	519	1036	1040	1038	1050	1054	1577	1560	1574	1575	1579	2107	2087
343	847	779	833	861	829	1367	1378	1341	1353	1391	2747	2764	2881	2786	2782	4165	4166	4184	4162	4158	5560	5505	5624	5538	5544		343	311	310	313	314	322	513	516	515	514	519	1036	1040	1038	1050	1054	1577	1563	1574	1577	1579	2108	2088
344	852	784	836	868	837	1373	1384	1347	1358	1394	2759	2774	2891	2793	2793	4177	4178	4206	4179	4177	5593	5537	5644	5568	5564		344	311	310	313	315	322	514	516	515	514	520	1038	1041	1038	1052	1057	1578	1567	1574	1578	1581	2109	2092
345	856	787	838	872	841	1376	1389	1353	1361	1400	2768	2789	2900	2801	2803	4192	4198	4220	4192	4189	5616	5562	5656	5593	5580		345	311	310	313	317	323	514	516	515	513	520	1038	1041	1038	1052	1057	1583	1569	1574	1578	1583	2111	2093
346	859	791	839	875	845	1380	1393	1358	1368	1403	2778	2800	2910	2818	2815	4208	4216	4232	4204	4201	5641	5586	5689	5619	5597		346	311	311	313	317	323	514	516	516	513	520	1040	1042	1040	1054	1058	1585	1569	1573	1579	1585	2114	2095
347	862	794	841	880	851	1383	1401	1367	1370	1406	2789	2812	2917	2832	2825	4219	4233	4250	4217	4215	5657	5601	5702	5643	5616		347	311	312	313	317	323	515	516	516	513	521	1040	1042	1040	1054	1058	1586	1568	1574	1579	1586	2115	2097
348	863	801	842	881	854	1385	1412	1370	1372	1414	2797	2820	2925	2835	2836	4232	4253	4261	4231	4229	5681	5613	5733	5664	5635		348	311	313	313	317	323	515	517	516	513	521	1040	1042	1042	1054	1058	1588	1569	1577	1577	1587	2114	2098
349	866	804	846	886	855	1388	1421	1376	1379	1422	2810	2827	2936	2845	2841	4243	4261	4275	4248	4241	5702	5629	5750	5681	5660		349	311	313	313	317	324	516	517	516	513	524	1040	1041	1043	1053	1058	1588	1572	1577	1578	1587	2114	2099
350	867	804	849	890	856	1390	1427	1384	1382	1422	2813	2832	2950	2856	2858	4256	4279	4285	4259	4255	5725	5646	5774	5696	5678		350	311	313	313	317	324	516	517	516	513	525	1043	1043	1043	1054	1060	1586	1572	1579	1578	1587	2114	2102
351	871	806	855	893	858	1393	1430	1388	1388	1428	2829	2840	2960	2865	2874	4271	4297	4306	4275	4273	5753	5664	5787	5725	5697		351	311	313	314	317	324	516	517	517	515	525	1043	1043	1043	1054	1060	1586	1575	1579	1579	1588	2114	2104
352	874	809	862	898	860	1397	1433	1394	1394	1432	2842	2855	2972	2872	2889	4282	4311	4316	4286	4286	5765	5690	5806	5749	5713		352	311	314	315	317	324	517	517	517	515	525	1043	1043	1045	1055	1060	1586	1576	1581	1579	1589	2115	2106
353	877	810	864	901	863	1402	1437	1395	1397	1435	2853	2862	2981	2881	2891	4301	4321	4331	4301	4298	5794	5707	5827	5765	5730		353	311	314	315	317	325	517	518	518	516	525	1042	1043	1044	1055	1060	1586	1577	1580	1579	1589	2115	2107
354	878	816	866	904	869	1407	1445	1396	1401	1439	2861	2875	2997	2890	2907	4325	4341	4351	4323	4322	5813	5734	5851	5784	5756		354	311	314	315	317	325	516	518	518	516	526	1044	1043	1049	1057	1061	1588	1578	1581	1581	1589	2118	2106
355	880	819	872	909	871	1410	1448	1404	1407	1444	2868	2881	3005	2904	2921	4339	4350	4375	4337	4338	5833	5742	5867	5807	5784		355	311	314	315	317	325	518	518	518	516	527	1044	1044	1050	1057	1061	1587	1578	1581	1583	1589	2118	2107
356	883	823	876	911	879	1418	1457	1407	1411	1449	2875	2890	3011	2919	2935	4361	4362	4393	4350	4355	5851	5761	5885	5828	5796		356	311	314	315	317	325	518	518	519	516	527	1047	1044	1051	1059	1063	1588	1578	1580	1583	1590	2119	2108
357	884	825	881	911	882	1421	1464	1412	1413	1455	2882	2899	3022	2938	2940	4378	4374	4416	4365	4373	5872	5781	5915	5851	5819		357	311	314	315	317	325	518	518	519	516	527	1047	1044	1052	1059	1062	1591	1579	1581	1586	1590	2123	2108
358	887	829	884	913	883	1426	1469	1415	1413	1459	2894	2912	3031	2947	2954	4398	4385	4430	4380	4390	5885	5795	5944	5877	5845		358	311	314	315	317	325	518	517	519	517	527	1048	1046	1052	1063	1064	1592	1579	1583	1587	1590	2125	2109
359	888	831	891	915	886	1433	1479	1425	1417	1465	2909	2923	3043	2958	2965	4415	4396	4443	4394	4404	5906	5809	5965	5899	5872		359	311	315	315	317	326	518	518	518	518	528	1047	1046	1051	1062	1064	1594	1579	1583	1590	1592	2127	2112
360	889	837	894	923	889	1443	1482	1425	1424	1474	2916	2930	3055	2971	2980	4433	4425	4461	4415	4425	5936	5827	5997	5919	5904		360	311	315	317	317	325	520	518	520	518	528	1049	1049	1052	1065	1065	1595	1580	1586	1590	1592	2131	2112
361	891	838	896	929	893	1449	1488	1430	1436	1477	2929	2936	3062	2985	2992	4446	4435	4477	4433	4443	5961	5844	6020	5947	5923		361	311	315	316	317	325	520	518	520	518	528	1048	1049	1053	1066	1065	1595	1581	1588	1590	1592	2130	2115
362	894	842	898	931	896	1460	1495	1434	1442	1481	2941	2955	3069	2991	3008	4462	4451	4497	4444	4456	5993	5868	6047	5972	5945		362	311	315	315	317	325	520	517	520	519	529	1049	1050	1054	1067	1065	1596	1581	1588	1589	1594	2130	2117
363	895	844	900	934	898	1467	1506	1440	1446	1482	2944	2957	3078	3001	3016	4476	4468	4515	4464	4465	6015	5891	6071	5989	5955		363	311	315	315	317	324	520	517	520	519	529	1049	1050	1053	1067	1065	1595	1581	1588	1590	1595	2132	2119
364	896	847	903	939	903	1477	1513	1446	1448	1487	2953	2964	3084	3016	3030	4495	4478	4531	4477	4481	6035	5907	6093	6008	5983		364	311	315	317	318	324	520	518	520	520	529	1050	1050	1054	1067	1066	1596	1581	1588	1590	1596	2132	2122
365	899	849	908	945	910	1482	1521	1452	1452	1491	2963	2973	3103	3032	3045	4508	4492	4553	4501	4493	6049	5929	6113	6029	6000		365	311	315	317	317	324	521	518	520	520	528	1050	1049	1054	1067	1066	1597	1586	1587	1590	1597	2132	2123
366	901	852	913	948	917	1485	1523	1456	1458	1497	2979	2989	3112	3042	3055	4525	4507	4568	4519	4510	6079	5952	6134	6058	6014		366	311	315	317	318	325	521	518	520	521	529	1050	1051	1055	1068	1067	1597	1586	1589	1591	1596	2132	2123
367	907	855	917	951	918	1487	1529	1459	1465	1499	2991	3005	3122	3050	3066	4542	4518	4581	4532	4527	6096	5979	6153	6071	6031		367	311	315	317	319	325	522	518	520	522	530	1050	1050	1055	1068	1068	1598	1585	1591	1591	1596	2131	2127
368	912	856	922	954	924	1490	1537	1461	1468	1508	2996	3010	3137	3061	3071	4559	4521	4593	4550	4549	6115	6000	6171	6093	6049		368	312	315	317	320	325	523	517	519	522	531	1050	1049	1057	1069	1068	1599	1586	1593	1593	1597	2139	2125
369	913	861	927	959	931	1494	1540	1470	1473	1512	3006	3019	3147	3073	3082	4574	4542	4598	4562	4562	6134	6025	6190	6122	6068		369	311	315	317	320	325	524	518	519	522	532	1049	1049	1057	1069	1068	1599	1587	1592	1593	1599	2140	2126
370	916	870	933	962	937	1503	1543	1481	1482	1517	3015	3029	3160	3084	3097	4603	4552	4612	4579	4574	6153	6054	6222	6136	6093		370	311	315	317	321	325	525	519	520	522	533	1051	1051	1058	1070	1068	1600	1588	1593	1592	1600	2144	2128
371	916	875	934	970	941	1508	1548	1484	1489	1522	3029	3035	3171	3092	3110	4618	4573	4628	4596	4596	6172	6072	6246	6155	6116		371	312	314	317	322	326	524	519	520	521	533	1051	1051	1058	1070	1068	1600	1588	1595	1593	1600	2145	2128
372	918	881	938	974	943	1509	1553	1488	1496	1531	3042	3047	3183	3106	3118	4630	4592	4638	4612	4611	6197	6098	6265	6176	6136		372	312	315	317	322	326	524	519	520	521	533	1053	1051	1060	1071	1068	1602	1591	1596	1592	1601	2147	2127
373	922	889	942	980	951	1517	1555	1492	1498	1535	3052	3059	3195	3117	3131	4645	4613	4657	4626	4633	6214	6113	6289	6193	6171		373	312	315	318	322	326	524	519	522	521	533	1052	1050	1059	1071	1068	1604	1593	1596	1592	1601	2149	2127
374	928	892	945	986	955	1527	1563	1502	1503	1543	3061	3068	3200	3125	3144	4663	4630	4672	4639	4651	6238	6135	6309	6215	6191		374	312	315	317	322	326	524	519	523	522	533	1055	1050	1059	1072	1068	1606	1594	1598	1594	1604	2151	2128
375	932	892	949	988	959	1535	1567	1508	1509	1551	3074	3077	3215	3135	3155	4676	4639	4688	4655	4666	6266	6159	6334	6238	6214		375	312	315	317	322	326	524	519	524	522	533	1055	1050	1060	1072	1068	1606	1596	1599	1596	1605	2153	2128
376	933	896	951	991	966	1540	1573	1514	1516	1559	3087	3091	3221	3148	3171	4700	4662	4710	4677	4685	6290	6178	6353	6264	6249		376	312	314	317	322	326	524	519	524	522	534	1056	1051	1063	1073	1068	1607	1598	1600	1598	1605	2157	2130
377	936	899	953	995	969	1547	1579	1518	1523	1560	3100	3102	3230	3162	3185	4721	4680	4730	4697	4705	6314	6201	6376	6290	6267		377	312	314	317	322	326	524	519	524	523	534	1056	1051	1063	1073	1068	1607	1598	1601	1599	1605	2156	2132
378	941	905	959	998	973	1552	1585	1522	1528	1564	3109	3113	3242	3171	3199	4728	4700	4753	4727	4717	6332	6225	6401	6308	6293		378	311	314	317	322	326	524	519	524	523	534	1057	1054	1066	1074	1069	1606	1598	1601	1599	1607	2155	2134
379	944	907	966	1003	976	1557	1588	1525	1536	1570	3119	3122	3252	3177	3212	4742	4727	4779	4742	4728	6350	6245	6422	6331	6312		379	311	314	317	322	327	524	519	524	523	535	1057	1054	1066	1073	1069	1606	1600	1602	1600	1608	2156	2134
380	947	912	972	1004	984	1564	1598	1531	1542	1574	3139	3129	3265	3191	3218	4758	4745	4803	4756	4742	6369	6268	6448	6351	6330		380	310	314	317	322	329	524	519	525	523	535	1060	1058	1066	1073	1071	1607	1601	1603	1600	1609	2157	2135
381	951	914	977	1009	988	1568	1605	1535	1550	1582	3150	3145	3278	3204	3223	4774	4766	4815	4770	4760	6392	6287	6465	6377	6362		381	311	314	317	322	330	524	518	525	523	535	1060	1059	1066	1073	1070	1608	1603	1605	1600	1610	2159	2135
382	955	915	982	1016	989	1569	1614	1543	1553	1586	3154	3160	3291	3216	3234	4796	4784	4831	4782	4774	6409	6312	6491	6401	6380		382	311	314	317	322	330	525	520	525	523	535	1060	1059	1069	1075	1071	1608	1604	1607	1601	1610	2160	2137
383	958	915	986	1018	990	1572	1621	1549	1563	1592	3165	3168	3301	3226	3249	4809	4796	4850	4805	4792	6423	6332	6514	6421	6397		383	312	314	317	322	330	524	520	526	524	535	1059	1058	1070	1075	1070	1610	1604	1607	1604	1611	2161	2138
384	959	919	991	1019	997	1582	1625	1554	1570	1602	3175	3181	3314	3235	3269	4832	4816	4879	4834	4808	6452	6354	6545	6457	6420		384	312	314	317	323	330	524	520	526	524	535	1060	1059	1072	1076	1072	1610	1605	1607	1604	1612	2161	2138
385	963	920	999	1023	1003	1585	1632	1554	1578	1612	3184	3193	3320	3250	3283	4851	4833	4892	4862	4822	6472	6373	6564	6483	6438		385	312	315	317	326	330	524	520	527	524	536	1061	1059	1073	1075	1072	1612	1607	1607	1605	1612	2161	2140
386	970	925	1004	1028	1012	1595	1638	1559	1579	1620	3198	3206	3336	3265	3293	4871	4843	4907	4877	4838	6495	6397	6585	6507	6463		386	312	315	318	326	330	524	520	527	524	536	1063	1060	1077	1075	1075	1612	1607	1607	1606	1611	2163	2141
387	977	931	1006	1030	1014	1602	1646	1565	1582	1627	3210	3213	3350	3278	3300	4891	4860	4923	4899	4853	6518	6414	6608	6530	6483		387	313	315	318	326	330	524	521	528	525	536	1062	1060	1076	1075	1075	1616	1608	1609	1606	1613	2162	2141
388	981	932	1009	1035	1015	1609	1653	1570	1588	1630	3225	3229	3360	3288	3312	4904	4885	4946	4928	4866	6539	6433	6636	6552	6507		388	313	315	318	326	331	525	521	528	525	536	1062	1061	1077	1076	1077	1617	1608	1610	1610	1614	2164	2142
389	984	938	1012	1038	1016	1613	1660	1573	1594	1633	3242	3241	3370	3294	3324	4930	4900	4960	4946	4888	6558	6453	6656	6569	6534		389	313	315	318	327	330	525	521	528	526	537	1062	1061	1076	1076	1078	1619	1609	1611	1612	1615	2168	2143
390	987	943	1019	1042	1021	1619	1665	1578	1599	1637	3250	3251	3381	3305	3333	4946	4919	4970	4965	4900	6575	6474	6679	6581	6561		390	314	317	318	327	330	525	522	528	527	537	1063	1064	1076	1077	1078	1619	1610	1612	1613	1614	2170	2146
391	989	945	1021	1044	1024	1625	1668	1586	1605	1639	3267	3260	3391	3315	3344	4965	4940	4993	4974	4920	6597	6491	6704	6594	6577		391	315	318	318	326	329	526	523	528	527	538	1064	1064	1076	1077	1078	1621	1611	1611	1614	1614	2171	2148
392	992	950	1025	1052	1025	1630	1675	1588	1611	1646	3282	3272	3407	3325	3353	4990	4958	5010	4987	4939	6621	6508	6729	6626	6596		392	315	318	318	326	329	526	526	528	527	538	1066	1067	1076	1080	1078	1621	1613	1612	1614	1614	2171	2148
393	994	956	1029	1055	1028	1634	1679	1593	1613	1654	3292	3284	3417	3340	3363	5018	4978	5033	4999	4962	6646	6531	6747	6639	6614		393	316	319	318	326	329	527	527	529	528	539	1066	1067	1075	1080	1079	1623	1614	1612	1614	1616	2173	2147
394	998	959	1032	1059	1032	1642	1688	1597	1621	1661	3306	3300	3429	3353	3382	5027	4994	5048	5012	4987	6671	6559	6770	6663	6636		394	316	320	318	326	329	527	528	529	528	539	1067	1067	1076	1081	1080	1627	1615	1613	1617	1616	2175	2148
395	1000	962	1036	1064	1033	1645	1694	1602	1632	1664	3314	3312	3445	3372	3393	5048	5008	5078	5027	5001	6703	6589	6799	6688	6655		395	316	320	319	326	329	528	528	529	528	539	1067	1067	1076	1081	1080	1628	1616	1613	1618	1619	2176	2151
396	1004	967	1040	1073	1034	1649	1703	1611	1637	1669	3319	3323	3455	3379	3404	5065	5024	5092	5038	5025	6724	6607	6816	6712	6666		396	316	319	318	326	329	529	529	529	528	539	1068	1071	1077	1083	1085	1630	1616	1614	1619	1619	2177	2152
397	1006	970	1041	1077	1039	1649	1710	1617	1641	1676	3331	3329	3465	3392	3412	5079	5038	5115	5054	5045	6743	6631	6846	6734	6685		397	316	319	318	326	330	529	529	530	530	539	1068	1071	1077	1084	1085	1630	1617	1615	1619	1619	2176	2153
398	1011	972	1046	1078	1043	1658	1713	1620	1650	1680	3345	3341	3481	3407	3424	5102	5053	5138	5068	5069	6769	6662	6870	6748	6717		398	316	319	318	327	330	529	530	530	530	540	1071	1073	1079	1087	1089	1629	1616	1615	1620	1619	2176	2153
399	1017	976	1050	1083	1044	1670	1723	1627	1657	1683	3354	3347	3490	3415	3431	5130	5075	5161	5084	5089	6797	6679	6898	6762	6741		399	316	320	318	327	330	529	530	530	530	541	1071	1074	1078	1088	1089	1629	1617	1616	1620	1620	2178	2153
400	1020	982	1054	1088	1044	1675	1728	1633	1662	1689	3368	3364	3497	3424	3446	5150	5090	5176	5099	5106	6816	6710	6926	6785	6765		400	317	320	318	326	330	529	530	530	530	541	1072	1073	1078	1088	1093	1629	1619	1617	1620	1619	2178	2153
401	1024	985	1059	1093	1046	1678	1734	1643	1672	1691	3381	3374	3508	3435	3455	5165	5117	5193	5117	5117	6838	6728	6950	6815	6787		401	317	321	318	326	330	528	531	531	531	542	1072	1074	1077	1087	1094	1631	1621	1620	1620	1619	2181	2156
402	1026	990	1060	1098	1049	1683	1742	1650	1677	1701	3396	3381	3520	3452	3472	5183	5127	5204	5131	5142	6866	6743	6979	6841	6807		402	318	320	318	326	331	528	531	531	532	543	1074	1074	1078	1088	1096	1633	1621	1619	1623	1620	2184	2156
403	1027	991	1067	1102	1050	1692	1748	1659	1679	1703	3401	3393	3532	3471	3480	5199	5143	5222	5146	5164	6891	6776	7007	6874	6830		403	318	320	320	327	331	529	531	532	532	543	1075	1075	1079	1090	1096	1634	1625	1622	1627	1621	2185	2158
404	1030	991	1072	1101	1056	1698	1751	1664	1687	1710	3414	3406	3548	3488	3491	5212	5154	5244	5165	5189	6928	6800	7035	6894	6853		404	318	320	320	327	330	531	531	532	533	544	1075	1074	1079	1090	1096	1634	1626	1624	1627	1622	2187	2161
405	1037	993	1077	1102	1061	1703	1759	1674	1691	1720	3422	3417	3562	3507	3503	5230	5186	5270	5186	5213	6946	6819	7057	6917	6877		405	319	320	320	329	331	532	531	532	535	544	1075	1076	1079	1091	1096	1636	1627	1626	1628	1623	2191	2162
406	1038	996	1081	1106	1065	1709	1762	1677	1693	1724	3434	3430	3575	3522	3515	5243	5195	5291	5198	5233	6975	6846	7081	6946	6911		406	319	320	320	329	331	532	532	534	535	544	1075	1075	1079	1091	1096	1636	1628	1627	1630	1625	2192	2163
407	1044	999	1084	1111	1069	1717	1768	1679	1701	1732	3445	3443	3584	3537	3532	5260	5209	5311	5213	5245	7000	6869	7117	6973	6940		407	320	321	320	329	331	531	533	534	535	544	1075	1078	1082	1094	1097	1638	1629	1628	1632	1628	2192	2166
408	1045	1004	1086	1116	1073	1727	1774	1682	1710	1737	3456	3459	3591	3550	3540	5274	5225	5331	5236	5270	7025	6895	7146	6991	6967		408	320	321	320	329	332	531	534	534	535	544	1075	1078	1082	1094	1097	1639	1629	1629	1632	1629	2195	2168
409	1050	1006	1087	1117	1076	1731	1784	1685	1717	1741	3471	3470	3607	3560	3551	5295	5247	5358	5258	5294	7059	6913	7176	7020	6992		409	320	321	320	330	332	531	535	536	535	544	1075	1078	1082	1096	1098	1640	1629	1628	1631	1630	2198	2168
410	1057	1009	1092	1118	1079	1733	1791	1688	1724	1747	3482	3482	3621	3573	3564	5311	5264	5374	5277	5311	7079	6949	7201	7049	7012		410	320	321	320	330	332	532	534	536	536	544	1075	1078	1082	1095	1097	1641	1629	1629	1631	1630	2202	2168
411	1063	1012	1097	1120	1083	1736	1799	1700	1728	1752	3499	3491	3632	3585	3580	5330	5276	5395	5291	5328	7103	6971	7228	7075	7040		411	320	321	321	332	332	532	534	536	537	544	1076	1079	1084	1100	1103	1641	1630	1630	1632	1631	2203	2168
412	1068	1017	1099	1122	1087	1741	1806	1703	1734	1758	3513	3501	3649	3594	3590	5345	5296	5414	5317	5366	7130	7001	7265	7099	7058		412	320	321	321	332	332	532	534	537	538	544	1076	1077	1082	1100	1103	1642	1634	1633	1634	1631	2203	2169
413	1070	1020	1105	1123	1091	1756	1810	1710	1737	1765	3525	3510	3664	3606	3605	5368	5318	5429	5338	5385	7143	7034	7282	7118	7087		413	320	321	321	332	332	532	535	537	540	544	1076	1078	1083	1101	1105	1642	1634	1633	1634	1633	2204	2170
414	1074	1025	1108	1123	1093	1766	1811	1715	1745	1769	3548	3517	3675	3614	3614	5385	5334	5449	5358	5397	7159	7053	7300	7144	7114		414	320	321	321	332	333	530	533	538	539	543	1076	1079	1083	1100	1104	1644	1636	1635	1633	1637	2206	2172
415	1078	1031	1110	1126	1098	1775	1819	1721	1752	1771	3557	3525	3684	3628	3623	5404	5359	5470	5382	5413	7194	7076	7334	7165	7142		415	321	321	322	333	332	531	533	538	539	543	1077	1079	1084	1100	1106	1644	1636	1636	1636	1637	2207	2172
416	1081	1036	1112	1129	1099	1786	1823	1724	1763	1778	3569	3542	3695	3640	3637	5412	5378	5482	5409	5434	7215	7102	7362	7192	7170		416	321	322	322	333	333	531	533	539	539	542	1076	1079	1084	1100	1106	1644	1636	1635	1637	1637	2211	2172
417	1089	1040	1114	1133	1104	1791	1831	1730	1774	1782	3585	3559	3703	3658	3651	5431	5394	5503	5427	5455	7242	7120	7393	7215	7194		417	321	323	322	333	333	532	533	540	540	543	1077	1079	1087	1101	1106	1644	1639	1635	1639	1637	2211	2174
418	1090	1044	1121	1135	1108	1798	1837	1735	1781	1789	3599	3569	3714	3666	3663	5450	5417	5516	5448	5474	7262	7151	7414	7240	7218		418	321	323	322	333	333	531	533	540	540	544	1077	1079	1086	1101	1106	1645	1639	1637	1641	1637	2212	2178
419	1090	1045	1123	1139	1108	1812	1848	1744	1784	1798	3609	3576	3725	3684	3673	5467	5433	5534	5469	5494	7290	7172	7432	7263	7248		419	321	323	322	334	333	531	533	540	542	544	1077	1080	1085	1102	1107	1645	1640	1638	1642	1638	2212	2180
420	1092	1051	1124	1140	1108	1816	1856	1751	1790	1801	3623	3593	3737	3697	3687	5488	5443	5557	5485	5518	7319	7198	7460	7296	7270		420	322	323	322	336	333	532	533	540	543	544	1077	1080	1086	1102	1107	1645	1640	1638	1644	1641	2212	2181
421	1098	1053	1125	1142	1115	1820	1861	1755	1797	1806	3635	3612	3751	3712	3704	5513	5468	5573	5502	5543	7347	7218	7488	7325	7297		421	321	323	322	336	333	532	533	540	543	545	1077	1080	1086	1104	1108	1645	1641	1638	1644	1643	2215	2182
422	1104	1058	1131	1150	1121	1826	1874	1765	1802	1811	3643	3623	3764	3723	3716	5530	5488	5596	5518	5557	7365	7249	7509	7359	7321		422	321	323	322	336	333	532	533	540	543	544	1077	1079	1086	1104	1108	1647	1645	1641	1646	1644	2216	2182
423	1107	1060	1135	1152	1127	1830	1880	1771	1808	1818	3662	3639	3779	3734	3728	5555	5517	5612	5525	5575	7399	7282	7534	7379	7350		423	321	323	323	336	333	532	533	541	543	543	1078	1079	1086	1105	1111	1648	1645	1643	1648	1646	2214	2182
424	1111	1065	1140	1155	1130	1835	1884	1774	1813	1824	3678	3656	3790	3750	3747	5576	5534	5626	5546	5589	7423	7307	7558	7412	7374		424	322	323	322	336	334	533	533	543	543	544	1077	1079	1086	1105	1111	1648	1645	1646	1650	1647	2215	2185
425	1113	1065	1141	1156	1134	1840	1891	1783	1818	1838	3690	3676	3804	3767	3759	5602	5550	5645	5570	5607	7452	7329	7578	7454	7408		425	322	323	322	337	334	534	534	543	543	544	1077	1081	1086	1105	1112	1648	1648	1647	1652	1647	2218	2184
426	1115	1068	1145	1161	1139	1844	1897	1795	1825	1842	3694	3688	3824	3783	3772	5612	5576	5664	5583	5619	7471	7360	7600	7474	7428		426	322	323	323	339	334	534	534	543	544	544	1077	1081	1087	1105	1113	1647	1651	1648	1654	1648	2223	2184
427	1118	1071	1146	1168	1144	1849	1908	1797	1831	1847	3707	3701	3839	3799	3783	5627	5596	5677	5606	5639	7497	7385	7619	7507	7449		427	322	323	323	339	334	535	535	543	543	546	1077	1084	1088	1106	1113	1648	1651	1648	1653	1648	2224	2186
428	1120	1073	1150	1170	1149	1852	1920	1803	1835	1853	3717	3710	3859	3813	3793	5656	5610	5702	5624	5657	7518	7411	7636	7534	7479		428	322	324	323	339	334	535	535	543	543	547	1077	1084	1088	1106	1113	1649	1652	1648	1653	1650	2224	2187
429	1121	1076	1152	1171	1153	1860	1926	1804	1843	1857	3728	3719	3871	3830	3809	5680	5634	5725	5644	5689	7536	7426	7653	7564	7507		429	322	327	323	340	334	535	535	544	543	548	1077	1085	1089	1108	1115	1650	1652	1651	1654	1649	2224	2190
430	1121	1079	1157	1173	1155	1868	1933	1810	1844	1862	3746	3730	3880	3843	3828	5703	5658	5738	5669	5712	7569	7452	7678	7588	7540		430	322	328	323	341	334	535	536	544	543	548	1077	1085	1089	1108	1114	1650	1654	1649	1656	1650	2227	2193
431	1128	1083	1160	1178	1159	1874	1939	1819	1851	1870	3765	3746	3893	3858	3837	5719	5672	5759	5685	5731	7592	7475	7710	7606	7566		431	322	328	323	342	334	535	536	544	544	548	1078	1088	1090	1108	1116	1649	1654	1649	1658	1651	2226	2194
432	1131	1087	1165	1182	1165	1882	1945	1825	1859	1876	3780	3756	3903	3873	3846	5728	5690	5776	5706	5753	7621	7493	7738	7632	7590		432	322	328	323	342	335	535	536	544	544	548	1078	1089	1090	1108	1115	1649	1655	1650	1659	1651	2228	2197
433	1136	1093	1170	1185	1168	1887	1952	1832	1867	1884	3792	3769	3922	3887	3857	5748	5703	5801	5726	5775	7656	7524	7766	7670	7618		433	323	328	323	342	335	535	537	544	544	548	1079	1091	1089	1108	1116	1649	1656	1653	1659	1652	2229	2202
434	1140	1096	1178	1186	1170	1894	1964	1837	1875	1892	3802	3780	3936	3901	3868	5768	5721	5822	5742	5790	7680	7552	7787	7690	7645		434	323	328	323	342	336	535	537	543	545	548	1078	1091	1089	1108	1116	1649	1658	1657	1659	1654	2230	2202
435	1146	1098	1185	1189	1173	1901	1970	1848	1884	1893	3818	3795	3957	3918	3877	5784	5739	5843	5761	5809	7712	7573	7816	7716	7670		435	323	328	322	342	336	535	537	543	545	548	1081	1091	1091	1108	1117	1650	1659	1658	1661	1656	2228	2204
436	1150	1101	1185	1194	1176	1910	1977	1852	1893	1899	3827	3812	3969	3927	3885	5807	5764	5864	5783	5828	7739	7597	7842	7730	7703		436	323	328	323	342	337	535	537	544	545	547	1081	1091	1091	1109	1117	1651	1661	1658	1660	1657	2228	2206
437	1154	1106	1188	1194	1182	1916	1981	1853	1899	1907	3845	3829	3980	3944	3898	5825	5788	5892	5803	5845	7765	7629	7878	7766	7737		437	324	329	325	343	337	535	537	543	545	547	1083	1092	1091	1109	1118	1652	1663	1660	1662	1658	2229	2206
438	1157	1110	1193	1200	1186	1920	1985	1859	1904	1916	3864	3839	3997	3962	3905	5849	5810	5911	5827	5871	7791	7654	7911	7791	7771		438	325	330	325	343	338	535	537	544	546	547	1083	1092	1091	1109	1117	1654	1664	1660	1662	1657	2230	2207
439	1158	1114	1194	1203	1189	1926	1990	1866	1906	1922	3882	3851	4007	3977	3925	5869	5825	5928	5845	5882	7820	7683	7931	7812	7799		439	325	330	325	343	338	534	536	544	546	547	1085	1094	1091	1112	1119	1655	1664	1660	1662	1656	2230	2208
440	1160	1119	1199	1211	1192	1934	1994	1871	1915	1929	3894	3866	4026	3991	3934	5891	5841	5943	5868	5911	7851	7705	7963	7838	7827		440	325	330	325	343	338	534	537	544	547	546	1085	1094	1090	1113	1119	1658	1666	1662	1661	1658	2230	2207
441	1160	1121	1205	1214	1192	1942	2000	1883	1921	1934	3906	3884	4040	4007	3946	5915	5868	5974	5893	5939	7881	7734	7991	7874	7855		441	325	330	326	343	338	534	538	544	547	547	1088	1094	1091	1113	1124	1661	1670	1664	1665	1661	2233	2208
442	1164	1121	1210	1218	1196	1956	2004	1889	1926	1944	3919	3903	4051	4017	3958	5936	5891	5984	5915	5961	7915	7763	8017	7911	7875		442	326	330	326	343	338	535	538	545	547	546	1087	1094	1091	1113	1124	1661	1670	1667	1668	1663	2234	2209
443	1169	1128	1213	1225	1202	1965	2005	1899	1930	1949	3933	3913	4062	4024	3974	5959	5909	6005	5933	5984	7943	7794	8048	7932	7912		443	326	330	326	343	338	535	538	546	547	546	1091	1096	1091	1115	1126	1663	1670	1667	1669	1664	2238	2210
444	1176	1133	1216	1228	1203	1969	2014	1905	1935	1963	3943	3926	4075	4035	3984	5972	5924	6024	5955	5997	7974	7825	8083	7963	7948		444	326	330	326	344	338	536	539	546	547	547	1091	1097	1091	1115	1126	1663	1669	1668	1670	1666	2238	2211
445	1185	1137	1219	1234	1210	1976	2017	1913	1939	1970	3951	3951	4085	4051	3999	5997	5939	6052	5970	6015	8005	7845	8104	7992	7974		445	326	330	326	344	338	536	539	547	547	547	1091	1098	1090	1117	1128	1663	1669	1669	1672	1666	2238	2212
446	1188	1141	1228	1236	1213	1982	2023	1917	1944	1977	3965	3962	4098	4059	4015	6021	5960	6077	5992	6032	8037	7865	8127	8014	8003		446	326	330	326	344	338	536	539	547	547	547	1091	1098	1090	1116	1129	1663	1670	1671	1675	1668	2238	2213
447	1193	1146	1235	1240	1217	1992	2033	1922	1946	1981	3980	3975	4114	4073	4036	6038	5986	6089	6013	6053	8062	7894	8155	8045	8026		447	326	330	326	344	338	536	539	546	548	547	1093	1099	1091	1118	1132	1664	1670	1672	1677	1669	2240	2213
448	1197	1149	1237	1243	1224	2000	2040	1936	1956	1985	3990	3985	4125	4090	4054	6056	6005	6107	6034	6070	8093	7923	8178	8066	8056		448	326	330	327	344	339	536	539	546	547	547	1093	1099	1091	1118	1132	1665	1670	1673	1678	1674	2244	2215
449	1200	1154	1243	1249	1230	2010	2049	1945	1958	1992	4005	3999	4149	4103	4068	6074	6021	6137	6059	6094	8132	7941	8203	8087	8077		449	326	330	327	344	339	536	540	548	547	547	1095	1100	1093	1119	1134	1665	1669	1673	1678	1673	2246	2216
450	1209	1161	1245	1254	1232	2016	2059	1948	1965	2003	4026	4013	4161	4122	4081	6094	6046	6159	6078	6107	8155	7972	8232	8110	8109		450	326	331	327	344	339	537	540	550	548	547	1095	1099	1093	1118	1134	1665	1670	1675	1678	1672	2249	2216
451	1215	1165	1248	1257	1235	2021	2067	1958	1969	2007	4039	4025	4183	4130	4101	6115	6072	6179	6095	6134	8188	8007	8265	8136	8136		451	326	331	329	344	339	536	540	550	549	546	1095	1100	1095	1118	1135	1665	1671	1674	1679	1671	2250	2218
452	1220	1172	1252	1263	1235	2031	2078	1963	1974	2014	4051	4041	4193	4143	4117	6134	6094	6201	6110	6161	8219	8041	8299	8155	8176		452	326	331	330	344	340	536	541	550	549	546	1095	1100	1095	1118	1136	1669	1672	1676	1680	1673	2252	2219
453	1226	1173	1259	1266	1238	2036	2085	1968	1981	2022	4069	4057	4208	4157	4131	6155	6113	6227	6130	6172	8250	8065	8328	8187	8203		453	326	331	330	344	340	536	542	551	549	547	1098	1100	1095	1120	1138	1670	1672	1676	1684	1675	2251	2219
454	1230	1173	1265	1270	1244	2041	2088	1975	1984	2030	4083	4073	4220	4169	4136	6179	6132	6245	6156	6199	8283	8093	8366	8225	8238		454	326	331	330	344	342	536	543	551	549	547	1098	1100	1095	1120	1138	1670	1671	1678	1684	1674	2252	2219
455	1235	1177	1268	1277	1249	2048	2099	1985	1987	2038	4093	4083	4238	4184	4154	6201	6160	6274	6180	6224	8306	8118	8399	8263	8267		455	326	331	330	344	342	536	543	551	549	547	1099	1103	1096	1120	1140	1672	1672	1678	1683	1676	2256	2218
456	1243	1183	1277	1283	1257	2051	2107	1993	1993	2041	4116	4102	4261	4196	4168	6224	6176	6300	6199	6240	8339	8140	8432	8297	8293		456	326	331	330	344	342	536	543	552	549	547	1099	1105	1095	1120	1139	1672	1672	1680	1683	1678	2258	2218
457	1249	1187	1282	1290	1259	2059	2118	1999	2000	2047	4133	4113	4273	4204	4186	6240	6197	6319	6222	6263	8361	8176	8460	8327	8324		457	325	331	331	344	344	538	544	551	550	547	1103	1106	1095	1120	1145	1674	1674	1685	1685	1679	2259	2220
458	1250	1192	1290	1290	1261	2063	2123	2005	2009	2053	4146	4126	4285	4218	4200	6262	6211	6338	6246	6278	8392	8210	8482	8352	8357		458	325	332	332	345	344	538	544	551	550	547	1103	1106	1095	1120	1145	1675	1675	1686	1686	1679	2258	2221
459	1255	1195	1294	1298	1266	2073	2135	2008	2015	2063	4173	4142	4302	4230	4216	6281	6235	6362	6265	6298	8426	8239	8523	8378	8389		459	325	331	332	345	344	538	544	552	550	547	1104	1108	1097	1122	1145	1677	1676	1690	1686	1681	2258	2223
460	1263	1201	1301	1304	1274	2081	2150	2018	2020	2069	4191	4168	4319	4253	4236	6307	6263	6382	6294	6320	8455	8275	8554	8406	8414		460	326	331	332	345	343	538	543	552	551	546	1104	1107	1095	1122	1145	1676	1677	1691	1689	1681	2258	2224
461	1267	1206	1304	1307	1277	2086	2154	2024	2034	2079	4198	4178	4334	4271	4247	6335	6292	6408	6322	6348	8484	8311	8593	8435	8449		461	328	331	332	345	344	539	543	553	551	547	1106	1108	1099	1124	1150	1677	1677	1694	1691	1683	2260	2225
462	1270	1208	1306	1313	1283	2095	2161	2035	2038	2087	4211	4203	4349	4290	4259	6364	6316	6428	6348	6364	8514	8342	8622	8474	8480		462	328	333	332	345	345	539	543	552	551	547	1106	1108	1099	1124	1150	1678	1678	1698	1693	1684	2261	2227
463	1274	1210	1313	1317	1286	2102	2169	2041	2046	2088	4229	4225	4371	4309	4276	6378	6339	6454	6367	6387	8549	8364	8640	8514	8505		463	328	333	332	347	345	540	543	552	551	548	1107	1109	1099	1126	1150	1678	1681	1698	1696	1684	2262	2227
464	1280	1213	1324	1321	1291	2111	2175	2051	2056	2096	4239	4248	4388	4320	4289	6399	6359	6477	6390	6410	8586	8400	8668	8543	8534		464	329	333	332	348	344	540	543	552	553	548	1108	1109	1099	1125	1150	1678	1681	1699	1696	1685	2267	2227
465	1285	1216	1331	1326	1294	2113	2184	2051	2065	2100	4252	4265	4417	4332	4302	6413	6379	6500	6409	6427	8624	8422	8695	8575	8554		465	328	334	332	348	344	541	544	553	554	548	1110	1113	1100	1128	1151	1680	1683	1699	1700	1687	2267	2228
466	1293	1219	1333	1332	1299	2119	2188	2060	2070	2106	4273	4279	4431	4353	4323	6434	6403	6528	6428	6451	8647	8461	8732	8611	8579		466	330	334	333	348	345	542	544	553	554	548	1110	1113	1100	1129	1151	1681	1685	1702	1700	1690	2265	2229
467	1296	1219	1336	1334	1302	2125	2195	2069	2074	2112	4286	4291	4445	4365	4339	6458	6423	6555	6446	6470	8684	8485	8766	8643	8607		467	330	334	333	348	345	543	545	553	555	549	1112	1114	1101	1130	1153	1681	1686	1703	1702	1689	2267	2233
468	1301	1222	1339	1337	1307	2135	2201	2075	2082	2120	4298	4303	4460	4385	4351	6483	6446	6577	6471	6493	8711	8521	8796	8667	8641		468	330	334	333	348	345	545	547	553	555	549	1111	1114	1100	1130	1153	1682	1688	1707	1702	1690	2268	2233
469	1307	1226	1343	1342	1315	2142	2207	2084	2091	2128	4322	4314	4473	4407	4371	6508	6470	6607	6492	6517	8739	8559	8821	8708	8679		469	330	334	333	347	345	544	547	553	557	550	1112	1114	1101	1131	1153	1683	1689	1707	1703	1691	2271	2232
470	1311	1233	1345	1346	1322	2150	2218	2095	2100	2133	4339	4328	4486	4422	4397	6529	6502	6637	6515	6544	8778	8591	8856	8737	8704		470	331	334	334	346	345	544	549	553	556	550	1112	1115	1102	1131	1153	1684	1692	1709	1707	1695	2273	2233
471	1315	1237	1350	1349	1332	2154	2225	2101	2109	2142	4354	4345	4507	4440	4415	6553	6528	6659	6542	6578	8810	8625	8895	8765	8738		471	331	335	335	346	345	545	549	553	556	552	1116	1117	1104	1132	1155	1689	1694	1708	1708	1699	2274	2236
472	1319	1241	1353	1360	1339	2162	2232	2105	2118	2159	4373	4364	4523	4456	4428	6571	6558	6676	6571	6599	8832	8653	8921	8804	8772		472	331	336	335	346	345	545	549	553	556	552	1116	1117	1104	1132	1156	1690	1700	1709	1708	1700	2277	2239
473	1324	1242	1360	1367	1340	2169	2240	2115	2125	2172	4386	4395	4532	4467	4440	6588	6580	6706	6599	6632	8872	8681	8953	8826	8809		473	331	336	335	346	346	545	549	553	558	552	1120	1117	1104	1132	1158	1692	1703	1709	1708	1701	2280	2243
474	1327	1250	1364	1373	1343	2174	2246	2126	2135	2181	4402	4413	4549	4483	4451	6613	6595	6728	6617	6657	8911	8713	8989	8857	8841		474	330	337	336	346	346	545	551	553	558	552	1120	1117	1104	1130	1157	1692	1706	1710	1709	1702	2284	2246
475	1336	1255	1367	1376	1344	2183	2255	2138	2141	2186	4414	4431	4574	4502	4467	6634	6620	6754	6638	6676	8933	8735	9018	8890	8867		475	330	337	336	346	346	544	550	553	558	552	1121	1117	1105	1132	1157	1693	1706	1711	1709	1702	2288	2251
476	1337	1257	1367	1380	1350	2188	2266	2143	2147	2193	4442	4444	4589	4516	4481	6652	6649	6777	6659	6704	8957	8772	9054	8916	8896		476	330	338	337	346	345	544	550	554	558	553	1120	1117	1103	1132	1157	1695	1706	1712	1714	1705	2291	2255
477	1343	1260	1372	1383	1353	2192	2270	2149	2160	2198	4458	4459	4602	4528	4499	6683	6682	6804	6680	6731	8986	8806	9089	8947	8928		477	330	338	338	348	345	544	551	554	558	553	1122	1118	1104	1133	1161	1697	1707	1711	1714	1707	2292	2256
478	1345	1262	1379	1388	1356	2201	2277	2158	2175	2201	4471	4473	4612	4548	4518	6701	6713	6824	6712	6756	9014	8843	9122	8980	8956		478	330	338	338	348	347	544	552	554	559	552	1122	1118	1104	1133	1160	1698	1708	1710	1714	1712	2293	2258
479	1349	1265	1383	1392	1360	2212	2282	2163	2181	2210	4488	4487	4636	4565	4535	6722	6731	6844	6741	6786	9048	8894	9147	9013	8989		479	330	338	338	348	348	544	552	554	559	552	1123	1120	1103	1133	1161	1700	1712	1714	1713	1712	2294	2257
480	1361	1272	1387	1396	1360	2220	2291	2174	2193	2217	4501	4505	4655	4581	4557	6755	6753	6869	6765	6808	9071	8930	9175	9043	9017		480	330	338	338	349	348	544	552	554	559	552	1123	1119	1103	1133	1161	1701	1710	1715	1714	1715	2294	2261
481	1365	1275	1392	1401	1365	2232	2299	2179	2201	2226	4515	4524	4668	4598	4575	6778	6776	6897	6789	6834	9102	8960	9207	9079	9044		481	330	340	338	350	349	544	552	555	559	552	1125	1121	1104	1133	1163	1700	1710	1718	1716	1717	2295	2261
482	1370	1278	1398	1404	1372	2238	2309	2187	2211	2234	4530	4548	4685	4614	4584	6801	6802	6915	6809	6854	9131	8993	9240	9121	9071		482	329	341	339	350	349	544	552	557	559	552	1124	1121	1104	1133	1163	1701	1711	1720	1717	1720	2298	2262
483	1377	1282	1399	1409	1374	2251	2314	2194	2223	2249	4549	4571	4708	4629	4597	6829	6827	6944	6830	6891	9166	9026	9268	9154	9109		483	332	343	339	349	348	544	552	559	560	552	1125	1125	1106	1134	1166	1704	1713	1722	1717	1720	2299	2267
484	1382	1284	1408	1416	1383	2259	2326	2203	2234	2259	4572	4589	4725	4642	4613	6854	6858	6975	6858	6918	9205	9066	9293	9204	9147		484	332	343	340	349	348	544	552	559	560	555	1126	1124	1107	1135	1166	1707	1715	1722	1717	1720	2299	2267
485	1389	1287	1409	1420	1386	2263	2330	2208	2243	2263	4577	4609	4742	4656	4629	6871	6876	6998	6881	6940	9249	9098	9323	9231	9173		485	332	343	340	349	348	544	553	560	560	556	1128	1126	1110	1137	1167	1708	1717	1724	1717	1721	2299	2266
486	1396	1291	1415	1427	1394	2270	2336	2220	2250	2272	4592	4619	4764	4674	4643	6901	6898	7016	6906	6968	9284	9129	9362	9264	9213		486	332	343	340	349	348	544	553	560	561	555	1129	1126	1110	1137	1167	1710	1718	1725	1717	1721	2301	2266
487	1403	1292	1419	1434	1396	2277	2340	2226	2262	2285	4618	4636	4782	4691	4663	6929	6926	7038	6924	6996	9313	9164	9393	9294	9243		487	333	343	340	349	348	544	553	560	561	556	1130	1130	1111	1141	1168	1711	1721	1728	1717	1723	2303	2267
488	1404	1295	1423	1443	1400	2284	2351	2233	2267	2292	4635	4655	4792	4708	4680	6962	6955	7058	6956	7026	9346	9194	9422	9323	9294		488	333	344	340	349	348	545	552	560	561	556	1130	1130	1111	1140	1168	1713	1721	1729	1718	1723	2306	2269
489	1406	1299	1429	1444	1410	2294	2359	2238	2277	2299	4639	4665	4818	4723	4693	6981	6978	7084	6977	7052	9391	9228	9461	9357	9333		489	332	344	340	349	348	545	552	561	561	556	1131	1131	1114	1140	1169	1715	1722	1730	1718	1725	2307	2269
490	1412	1303	1436	1446	1416	2304	2373	2245	2283	2307	4653	4681	4840	4737	4709	7008	7005	7125	7003	7066	9419	9266	9495	9394	9367		490	332	344	341	351	348	545	552	561	561	557	1131	1131	1114	1140	1169	1716	1721	1731	1721	1725	2310	2271
491	1415	1306	1437	1452	1417	2314	2379	2256	2291	2316	4673	4697	4863	4753	4725	7040	7019	7154	7032	7087	9454	9307	9545	9427	9405		491	333	344	341	353	348	545	552	561	561	561	1132	1133	1117	1142	1172	1716	1722	1732	1725	1725	2311	2273
492	1418	1314	1442	1457	1423	2320	2391	2272	2298	2323	4689	4702	4886	4773	4737	7066	7039	7173	7059	7101	9496	9353	9579	9464	9455		492	334	344	341	354	350	545	552	561	561	561	1132	1133	1116	1142	1173	1721	1726	1734	1729	1726	2313	2279
493	1427	1324	1447	1463	1429	2324	2397	2273	2305	2332	4701	4719	4898	4786	4753	7088	7066	7199	7085	7131	9538	9385	9614	9493	9486		493	334	344	341	356	351	545	553	561	561	561	1134	1133	1116	1143	1173	1720	1728	1734	1730	1725	2315	2283
494	1435	1331	1452	1468	1433	2344	2404	2280	2312	2341	4714	4729	4916	4800	4767	7112	7090	7221	7119	7159	9579	9420	9646	9531	9515		494	334	344	341	357	351	545	554	561	563	563	1133	1133	1116	1143	1173	1722	1731	1735	1731	1726	2318	2286
495	1443	1337	1454	1475	1437	2351	2414	2288	2314	2353	4733	4747	4935	4813	4787	7139	7112	7248	7152	7188	9613	9454	9678	9568	9547		495	334	345	341	357	350	545	554	563	564	564	1135	1136	1118	1143	1174	1722	1730	1735	1731	1727	2322	2285
496	1446	1343	1457	1479	1440	2361	2429	2301	2321	2360	4744	4765	4952	4832	4802	7165	7140	7271	7176	7209	9644	9493	9717	9602	9592		496	334	345	341	357	350	546	554	564	564	564	1135	1136	1117	1143	1174	1722	1730	1737	1735	1728	2326	2289
497	1449	1348	1462	1481	1446	2371	2437	2313	2329	2366	4762	4781	4973	4849	4828	7198	7165	7301	7189	7234	9670	9534	9758	9644	9623		497	336	345	342	356	351	546	554	564	567	564	1136	1139	1118	1143	1177	1724	1734	1740	1736	1731	2327	2291
498	1457	1350	1469	1490	1452	2382	2445	2324	2337	2375	4781	4788	4996	4862	4844	7216	7204	7335	7214	7261	9721	9566	9791	9692	9665		498	336	345	344	356	351	547	554	565	568	564	1136	1140	1121	1143	1177	1725	1736	1738	1737	1732	2327	2297
499	1463	1353	1472	1496	1455	2393	2453	2330	2340	2390	4801	4805	5011	4888	4861	7246	7223	7369	7238	7295	9756	9596	9828	9725	9701		499	336	345	344	356	351	548	556	565	568	565	1140	1140	1122	1148	1177	1726	1736	1739	1740	1733	2329	2297
500	1473	1355	1476	1503	1465	2400	2461	2335	2344	2399	4821	4833	5032	4905	4880	7271	7252	7384	7266	7315	9787	9627	9869	9763	9734		500	336	345	344	354	351	548	558	565	567	566	1140	1140	1121	1148	1177	1728	1736	1741	1743	1735	2329	2297
501	1479	1357	1483	1508	1478	2411	2469	2343	2354	2412	4834	4846	5051	4922	4902	7290	7270	7406	7299	7344	9820	9666	9912	9791	9763		501	338	345	344	354	351	549	560	566	567	566	1148	1141	1122	1148	1179	1730	1740	1739	1744	1736	2331	2298
502	1485	1361	1492	1512	1481	2419	2478	2352	2364	2421	4845	4869	5066	4938	4920	7319	7304	7426	7318	7370	9858	9702	9958	9816	9808		502	338	345	345	354	352	550	560	567	567	566	1148	1141	1123	1149	1179	1731	1740	1736	1744	1738	2333	2297
503	1491	1372	1499	1516	1486	2427	2487	2361	2374	2431	4867	4877	5088	4957	4941	7356	7335	7445	7351	7396	9893	9739	9996	9858	9844		503	340	345	346	354	352	550	560	567	567	566	1151	1140	1124	1149	1180	1733	1743	1738	1748	1742	2336	2302
504	1498	1375	1503	1523	1494	2436	2498	2370	2383	2437	4886	4893	5111	4974	4957	7387	7359	7479	7372	7420	9929	9779	10045	9894	9880		504	340	345	346	354	352	551	561	567	570	566	1151	1140	1124	1151	1181	1734	1744	1741	1750	1744	2338	2303
505	1508	1381	1510	1528	1499	2443	2506	2378	2387	2443	4902	4903	5139	4989	4971	7415	7382	7507	7403	7452	9972	9817	10079	9937	9902		505	340	344	346	354	352	551	562	567	570	566	1152	1139	1126	1151	1181	1733	1745	1742	1752	1748	2337	2305
506	1515	1386	1508	1534	1507	2449	2519	2387	2400	2453	4921	4924	5163	5005	4992	7448	7415	7533	7434	7479	10004	9843	10121	9984	9937		506	341	345	349	353	352	553	564	566	570	567	1152	1140	1126	1152	1184	1734	1746	1742	1753	1748	2340	2308
507	1518	1389	1513	1540	1516	2457	2530	2400	2409	2464	4942	4943	5177	5022	5011	7480	7444	7565	7454	7510	10044	9887	10163	10019	9979		507	341	345	347	353	352	554	564	568	570	567	1154	1143	1126	1154	1187	1736	1749	1740	1753	1748	2340	2309
508	1526	1397	1517	1546	1522	2467	2540	2409	2420	2474	4958	4956	5201	5036	5029	7514	7475	7593	7489	7531	10075	9914	10188	10063	10017		508	341	345	348	353	352	555	564	568	569	568	1154	1143	1127	1154	1187	1736	1749	1741	1754	1756	2340	2313
509	1529	1400	1522	1554	1527	2477	2547	2418	2424	2487	4977	4976	5215	5055	5047	7532	7498	7626	7516	7564	10126	9959	10225	10102	10065		509	342	347	348	354	352	555	564	569	569	568	1156	1142	1127	1155	1189	1736	1748	1745	1754	1759	2341	2316
510	1538	1404	1525	1559	1533	2483	2555	2424	2431	2503	4990	4995	5240	5083	5067	7558	7526	7651	7545	7589	10161	9998	10266	10127	10097		510	342	348	348	354	352	555	565	569	569	569	1156	1142	1127	1154	1190	1738	1748	1747	1754	1761	2342	2320
511	1543	1408	1532	1566	1534	2489	2561	2436	2441	2512	5005	5015	5251	5099	5092	7581	7558	7680	7567	7607	10193	10034	10304	10160	10140		511	342	349	348	354	354	555	565	569	569	571	1160	1143	1128	1157	1191	1738	1748	1749	1757	1761	2343	2323
512	1547	1416	1538	1570	1543	2498	2577	2445	2448	2527	5031	5024	5261	5120	5114	7607	7593	7705	7598	7642	10237	10076	10345	10204	10175		512	341	349	349	356	353	555	567	570	570	574	1160	1143	1127	1158	1192	1741	1748	1751	1757	1761	2343	2324
513	1555	1425	1546	1570	1546	2511	2583	2452	2456	2534	5052	5036	5287	5137	5138	7637	7628	7744	7623	7672	10274	10110	10384	10233	10210		513	341	349	349	357	353	555	567	571	569	575	1163	1146	1130	1159	1192	1742	1745	1751	1764	1762	2350	2328
514	1556	1431	1556	1583	1548	2522	2590	2460	2464	2548	5070	5057	5301	5153	5167	7664	7656	7770	7655	7693	10306	10140	10421	10282	10241		514	341	350	348	358	353	555	568	569	570	575	1162	1146	1130	1160	1191	1744	1747	1752	1764	1763	2352	2327
515	1561	1436	1562	1596	1553	2529	2598	2472	2474	2558	5092	5079	5324	5166	5182	7694	7688	7790	7676	7719	10344	10178	10460	10322	10291		515	341	352	349	358	353	556	568	569	570	576	1164	1147	1133	1163	1195	1743	1749	1753	1768	1767	2356	2327
516	1565	1437	1570	1606	1555	2541	2609	2483	2487	2561	5115	5103	5341	5191	5204	7736	7723	7819	7704	7760	10373	10213	10499	10361	10333		516	341	352	349	358	353	556	568	569	571	576	1167	1147	1134	1164	1194	1745	1750	1754	1765	1766	2360	2329
517	1567	1439	1571	1615	1562	2547	2620	2497	2499	2574	5140	5120	5360	5219	5220	7768	7750	7856	7735	7793	10422	10253	10530	10406	10366		517	341	353	350	358	353	557	568	571	572	576	1167	1149	1136	1165	1197	1746	1751	1759	1765	1768	2363	2331
518	1573	1442	1578	1616	1568	2559	2632	2513	2510	2583	5162	5133	5373	5237	5237	7799	7775	7885	7767	7813	10461	10300	10572	10446	10397		518	341	354	351	359	354	557	568	572	572	579	1168	1149	1135	1164	1200	1749	1752	1761	1766	1768	2364	2332
519	1580	1443	1581	1621	1572	2570	2640	2527	2517	2594	5179	5150	5394	5260	5265	7826	7807	7913	7797	7842	10511	10333	10619	10486	10432		519	341	355	352	359	354	557	570	571	572	581	1170	1150	1137	1166	1203	1749	1753	1762	1765	1771	2366	2332
520	1583	1448	1587	1632	1579	2585	2649	2534	2525	2609	5196	5173	5414	5281	5287	7858	7841	7947	7823	7866	10554	10368	10641	10523	10470		520	341	358	352	359	354	559	570	572	572	581	1170	1152	1139	1166	1204	1748	1755	1765	1767	1772	2370	2334
521	1589	1455	1591	1640	1583	2593	2660	2547	2534	2612	5229	5206	5427	5302	5300	7890	7864	7975	7854	7887	10590	10398	10672	10557	10502		521	341	358	352	359	354	559	570	573	572	583	1171	1152	1145	1166	1207	1749	1756	1765	1769	1775	2373	2337
522	1596	1464	1598	1645	1592	2602	2669	2551	2543	2623	5256	5232	5448	5320	5310	7922	7894	8013	7878	7916	10646	10441	10712	10598	10548		522	342	359	352	361	355	561	570	573	571	585	1175	1152	1146	1166	1208	1754	1759	1769	1774	1778	2372	2341
523	1604	1466	1610	1649	1600	2608	2679	2560	2553	2629	5275	5248	5462	5341	5333	7955	7926	8040	7905	7942	10685	10488	10758	10644	10585		523	344	360	352	361	355	561	570	573	570	585	1175	1152	1148	1167	1209	1756	1759	1769	1774	1778	2375	2341
524	1611	1469	1618	1656	1607	2616	2688	2566	2562	2642	5288	5260	5483	5362	5352	7974	7952	8067	7942	7972	10726	10530	10801	10681	10628		524	344	360	352	361	355	561	570	573	570	585	1176	1151	1149	1169	1212	1757	1759	1770	1777	1781	2376	2345
525	1618	1475	1623	1661	1612	2624	2707	2575	2573	2653	5300	5283	5502	5384	5370	8001	7971	8081	7964	7996	10761	10560	10829	10708	10664		525	344	360	352	361	355	561	570	573	570	586	1176	1152	1149	1170	1212	1758	1759	1772	1778	1781	2377	2347
526	1628	1477	1624	1665	1618	2637	2717	2590	2584	2661	5312	5305	5528	5401	5391	8034	7994	8107	7997	8032	10818	10586	10859	10740	10697		526	344	360	352	361	355	561	570	573	570	586	1176	1153	1149	1170	1212	1758	1759	1773	1777	1782	2380	2348
527	1629	1482	1627	1673	1623	2647	2722	2598	2593	2669	5329	5325	5547	5408	5407	8057	8019	8146	8044	8062	10861	10627	10904	10786	10738		527	344	360	353	361	356	562	570	573	570	587	1176	1153	1149	1171	1213	1759	1760	1772	1778	1784	2381	2351
528	1636	1489	1631	1680	1627	2652	2736	2607	2604	2684	5350	5350	5572	5425	5438	8081	8056	8177	8085	8088	10902	10666	10946	10822	10769		528	344	361	353	361	356	562	569	574	571	587	1176	1153	1149	1172	1213	1759	1761	1772	1779	1784	2384	2351
529	1646	1493	1640	1687	1632	2661	2746	2622	2609	2693	5372	5367	5596	5445	5460	8105	8080	8205	8110	8122	10933	10716	10980	10858	10798		529	344	361	353	360	358	562	569	574	572	587	1176	1153	1149	1171	1212	1758	1761	1775	1779	1785	2385	2352
530	1657	1500	1646	1691	1642	2670	2755	2629	2621	2703	5390	5388	5621	5461	5485	8135	8108	8231	8130	8140	10960	10737	11009	10882	10831		530	345	361	354	361	358	562	569	573	573	587	1177	1153	1149	1171	1212	1759	1761	1774	1779	1784	2386	2352
531	1663	1507	1660	1696	1651	2679	2764	2634	2631	2715	5417	5421	5644	5473	5504	8166	8141	8258	8155	8169	11009	10766	11048	10917	10877		531	345	360	354	361	358	562	569	573	573	588	1178	1153	1150	1171	1212	1761	1761	1773	1781	1783	2388	2352
532	1668	1512	1668	1704	1659	2690	2773	2643	2643	2728	5436	5440	5668	5501	5530	8194	8174	8289	8175	8196	11034	10811	11094	10960	10922		532	345	360	355	361	359	563	569	574	574	589	1177	1154	1150	1170	1211	1761	1761	1773	1783	1782	2390	2352
533	1678	1520	1673	1712	1663	2701	2783	2654	2653	2741	5454	5453	5686	5524	5553	8225	8197	8323	8213	8223	11070	10854	11139	11004	10960		533	345	360	357	361	359	564	569	574	574	589	1177	1154	1150	1170	1212	1763	1763	1773	1783	1783	2390	2353
534	1681	1523	1683	1718	1671	2711	2791	2662	2658	2750	5474	5474	5701	5541	5573	8253	8227	8354	8244	8266	11115	10900	11177	11039	10997		534	345	360	356	361	359	565	569	575	573	589	1178	1154	1151	1171	1214	1762	1765	1773	1783	1783	2390	2353
535	1687	1529	1689	1723	1682	2722	2802	2672	2673	2764	5495	5496	5719	5560	5595	8286	8256	8385	8283	8290	11151	10937	11223	11076	11041		535	345	360	356	362	359	566	569	575	573	589	1178	1155	1151	1173	1216	1764	1765	1775	1784	1784	2393	2353
536	1695	1536	1701	1729	1693	2732	2808	2680	2680	2769	5515	5515	5735	5571	5622	8314	8283	8415	8302	8317	11183	10977	11275	11106	11072		536	345	360	356	362	360	566	569	576	573	589	1178	1155	1151	1172	1216	1766	1767	1775	1787	1784	2394	2355
537	1697	1541	1707	1737	1700	2737	2813	2684	2692	2775	5539	5525	5752	5598	5641	8343	8312	8438	8329	8352	11219	11021	11321	11154	11111		537	345	360	356	362	360	567	569	576	573	590	1179	1156	1152	1173	1216	1768	1767	1777	1788	1785	2396	2355
538	1700	1550	1712	1743	1708	2744	2822	2699	2711	2783	5566	5542	5772	5620	5662	8385	8342	8471	8361	8391	11262	11051	11365	11201	11162		538	345	360	356	362	361	567	568	577	573	590	1181	1157	1152	1173	1218	1771	1767	1778	1791	1787	2398	2360
539	1704	1554	1716	1749	1716	2755	2830	2707	2728	2792	5578	5566	5784	5642	5696	8413	8374	8510	8389	8414	11293	11096	11410	11238	11197		539	345	360	356	362	362	567	568	577	574	590	1182	1159	1152	1174	1219	1772	1767	1782	1792	1787	2403	2363
540	1705	1568	1724	1754	1723	2761	2840	2718	2738	2798	5599	5582	5806	5662	5713	8446	8407	8541	8428	8439	11331	11139	11449	11292	11226		540	345	360	358	362	362	566	569	577	574	590	1183	1159	1152	1173	1220	1775	1767	1784	1793	1788	2404	2364
541	1709	1572	1731	1763	1729	2768	2854	2723	2748	2808	5610	5601	5828	5678	5741	8477	8438	8567	8468	8465	11371	11181	11493	11326	11268		541	345	360	358	363	362	567	569	577	574	590	1182	1159	1152	1173	1219	1776	1768	1785	1793	1790	2405	2363
542	1715	1580	1739	1772	1738	2777	2860	2734	2759	2819	5626	5621	5850	5699	5760	8500	8472	8616	8495	8493	11427	11229	11542	11363	11307		542	345	360	358	363	362	567	570	578	574	590	1182	1159	1153	1174	1221	1776	1768	1785	1795	1790	2405	2364
543	1727	1584	1745	1780	1742	2789	2873	2742	2768	2825	5643	5636	5880	5723	5779	8526	8496	8642	8525	8516	11470	11265	11590	11412	11339		543	345	361	359	363	363	567	570	578	574	591	1184	1161	1154	1174	1222	1777	1769	1786	1795	1790	2405	2366
544	1729	1589	1751	1784	1746	2797	2886	2750	2778	2835	5665	5664	5901	5748	5811	8563	8529	8679	8563	8554	11513	11302	11627	11466	11377		544	345	361	359	362	363	567	570	579	574	591	1185	1162	1153	1177	1221	1777	1770	1789	1795	1790	2404	2371
545	1736	1591	1758	1791	1752	2806	2901	2756	2790	2846	5683	5696	5926	5765	5830	8592	8557	8704	8594	8586	11558	11344	11662	11508	11427		545	345	361	359	362	363	567	569	579	575	591	1187	1163	1153	1179	1223	1778	1772	1791	1796	1790	2406	2376
546	1747	1601	1763	1795	1760	2817	2916	2761	2800	2858	5706	5716	5941	5786	5852	8620	8591	8739	8626	8617	11608	11380	11707	11554	11458		546	345	361	359	363	363	567	570	578	575	592	1187	1165	1152	1180	1223	1778	1773	1792	1796	1791	2407	2378
547	1752	1611	1772	1803	1767	2823	2932	2776	2806	2869	5717	5745	5961	5800	5870	8648	8625	8772	8658	8645	11651	11420	11752	11586	11497		547	345	361	359	363	363	568	570	578	575	593	1187	1165	1151	1181	1225	1778	1775	1793	1796	1795	2408	2381
548	1757	1622	1778	1815	1770	2827	2946	2787	2811	2884	5739	5763	5986	5818	5883	8682	8651	8809	8695	8673	11694	11465	11804	11628	11552		548	345	361	359	363	363	568	569	578	576	594	1187	1167	1151	1181	1225	1781	1775	1794	1798	1795	2409	2381
549	1759	1633	1785	1823	1774	2839	2962	2799	2821	2893	5762	5774	6019	5839	5904	8704	8684	8840	8718	8701	11736	11520	11838	11668	11596		549	345	362	359	363	363	568	569	579	576	594	1189	1165	1153	1181	1228	1783	1777	1797	1798	1795	2412	2383
550	1767	1640	1797	1833	1786	2843	2972	2808	2827	2905	5778	5800	6035	5861	5921	8735	8715	8868	8750	8739	11780	11560	11884	11719	11637		550	345	362	360	363	363	570	571	580	576	595	1189	1165	1154	1182	1227	1785	1777	1798	1798	1795	2412	2382
551	1772	1648	1802	1840	1794	2858	2979	2816	2842	2910	5788	5818	6049	5890	5943	8767	8738	8889	8778	8770	11825	11606	11923	11765	11675		551	345	363	360	364	362	570	572	580	578	596	1190	1165	1154	1182	1227	1785	1781	1798	1798	1795	2416	2386
552	1779	1652	1808	1849	1800	2868	2993	2824	2853	2923	5817	5839	6071	5909	5961	8795	8784	8915	8811	8796	11858	11636	11955	11821	11720		552	346	363	361	364	363	570	572	580	578	596	1193	1166	1155	1182	1228	1787	1783	1798	1798	1797	2418	2386
553	1785	1662	1814	1857	1805	2883	3005	2838	2867	2932	5842	5859	6092	5934	5982	8825	8809	8949	8841	8829	11900	11678	11996	11859	11765		553	346	364	361	363	364	570	572	580	578	596	1193	1168	1156	1182	1228	1787	1784	1800	1799	1796	2419	2389
554	1793	1675	1817	1861	1814	2893	3018	2845	2876	2943	5863	5879	6106	5951	6005	8851	8842	8987	8887	8855	11942	11721	12041	11890	11797		554	346	364	361	363	364	569	572	580	578	596	1194	1168	1155	1184	1228	1788	1785	1800	1799	1794	2420	2391
555	1800	1680	1823	1870	1824	2904	3030	2851	2878	2951	5884	5896	6139	5974	6024	8892	8871	9018	8918	8892	11994	11766	12088	11930	11841		555	346	365	363	364	365	569	572	580	579	596	1194	1168	1156	1184	1228	1790	1786	1802	1800	1796	2422	2393
556	1807	1690	1831	1876	1835	2918	3044	2863	2891	2961	5903	5920	6170	5994	6040	8931	8906	9047	8949	8926	12033	11806	12130	11968	11882		556	346	365	363	365	366	569	573	580	579	598	1195	1171	1158	1184	1230	1790	1788	1802	1803	1798	2421	2395
557	1810	1697	1836	1884	1842	2929	3053	2870	2900	2974	5930	5937	6204	6029	6058	8955	8948	9071	8987	8962	12080	11849	12183	12014	11914		557	348	365	364	366	368	570	574	580	579	597	1196	1171	1158	1185	1231	1793	1789	1805	1804	1800	2421	2395
558	1812	1706	1839	1890	1850	2943	3060	2881	2915	2988	5954	5953	6224	6058	6073	8991	8973	9100	9016	8991	12114	11883	12235	12047	11960		558	348	366	364	366	368	572	574	580	579	597	1196	1171	1160	1187	1230	1795	1791	1808	1804	1800	2421	2397
559	1822	1716	1849	1897	1856	2957	3073	2890	2929	3004	5981	5972	6241	6084	6088	9026	8997	9137	9063	9019	12149	11940	12285	12083	11997		559	348	366	365	366	368	573	574	580	580	597	1196	1171	1159	1187	1233	1795	1792	1810	1808	1801	2423	2399
560	1830	1723	1856	1906	1864	2967	3081	2901	2937	3015	6001	5984	6253	6111	6109	9055	9023	9171	9088	9046	12189	11968	12333	12130	12031		560	349	367	364	366	367	573	574	583	580	597	1196	1172	1161	1188	1234	1795	1791	1812	1810	1801	2424	2400
561	1832	1725	1863	1909	1871	2978	3093	2907	2948	3026	6016	6000	6276	6130	6133	9076	9055	9213	9119	9079	12241	12015	12382	12177	12074		561	349	367	364	366	368	573	574	583	582	598	1196	1175	1161	1188	1238	1796	1793	1812	1813	1803	2425	2405
562	1838	1732	1876	1919	1876	2985	3102	2920	2962	3034	6043	6018	6300	6147	6158	9111	9081	9247	9151	9110	12279	12052	12424	12218	12108		562	349	367	364	367	368	573	574	583	582	600	1199	1176	1161	1187	1239	1798	1794	1812	1814	1803	2429	2406
563	1844	1741	1878	1933	1886	2997	3113	2933	2975	3041	6066	6040	6320	6157	6176	9140	9117	9286	9180	9139	12325	12096	12471	12263	12147		563	350	367	364	369	369	575	576	584	582	600	1201	1176	1163	1187	1239	1799	1794	1814	1815	1807	2432	2407
564	1852	1752	1886	1938	1889	3012	3128	2947	2987	3056	6087	6052	6337	6187	6204	9173	9151	9320	9206	9178	12385	12127	12505	12310	12179		564	351	368	364	369	369	576	577	585	582	600	1203	1178	1165	1187	1239	1801	1795	1816	1818	1807	2433	2406
565	1856	1756	1901	1944	1892	3023	3137	2957	2995	3064	6098	6065	6353	6211	6233	9211	9179	9356	9245	9213	12423	12165	12547	12349	12232		565	351	368	364	369	370	577	578	587	582	601	1203	1178	1166	1188	1239	1803	1794	1816	1819	1808	2435	2406
566	1862	1762	1911	1950	1898	3033	3149	2967	3012	3076	6116	6092	6374	6224	6249	9245	9214	9388	9278	9253	12463	12208	12604	12387	12274		566	351	368	364	369	370	577	579	587	583	602	1204	1178	1168	1190	1240	1803	1796	1817	1823	1808	2437	2408
567	1868	1772	1917	1960	1903	3045	3157	2974	3018	3083	6145	6111	6391	6245	6268	9299	9253	9418	9309	9292	12506	12240	12651	12435	12322		567	352	368	364	370	370	579	579	587	583	602	1204	1181	1171	1190	1240	1803	1798	1819	1824	1809	2441	2411
568	1874	1783	1923	1963	1908	3060	3171	2992	3023	3094	6163	6134	6418	6274	6285	9334	9290	9455	9341	9322	12553	12284	12698	12482	12365		568	353	369	364	370	372	580	580	587	583	605	1204	1181	1172	1190	1242	1805	1801	1820	1826	1810	2443	2415
569	1881	1788	1931	1973	1917	3073	3183	2999	3033	3115	6189	6158	6432	6298	6301	9379	9323	9485	9385	9359	12593	12316	12730	12519	12414		569	353	368	364	370	373	581	580	588	583	605	1206	1182	1174	1193	1245	1811	1801	1823	1829	1816	2446	2419
570	1887	1790	1934	1980	1921	3084	3193	3008	3042	3122	6214	6173	6464	6322	6327	9418	9364	9522	9429	9396	12635	12354	12764	12554	12459		570	353	368	365	370	373	582	581	588	583	605	1207	1183	1175	1197	1249	1812	1802	1824	1829	1819	2451	2422
571	1891	1797	1935	1987	1925	3089	3202	3020	3054	3134	6233	6191	6478	6350	6356	9464	9402	9565	9460	9429	12673	12407	12807	12584	12498		571	353	371	364	370	373	583	584	588	584	605	1207	1183	1176	1197	1250	1814	1805	1826	1831	1819	2453	2427
572	1896	1805	1947	1993	1930	3098	3221	3029	3065	3148	6267	6223	6494	6382	6377	9494	9422	9596	9497	9468	12718	12453	12865	12633	12550		572	354	371	365	371	373	583	584	589	585	605	1209	1185	1176	1199	1250	1814	1807	1827	1832	1821	2458	2429
573	1902	1812	1953	2000	1939	3112	3234	3041	3080	3164	6290	6240	6519	6413	6403	9539	9458	9625	9529	9500	12758	12507	12914	12669	12615		573	354	371	366	371	374	583	584	589	585	605	1210	1187	1175	1201	1252	1818	1810	1827	1832	1820	2458	2430
574	1903	1820	1963	2007	1952	3122	3246	3051	3094	3171	6311	6256	6548	6436	6422	9576	9497	9649	9558	9527	12801	12573	12965	12708	12666		574	354	371	366	370	377	583	584	590	588	605	1210	1186	1175	1203	1253	1818	1808	1826	1834	1820	2458	2431
575	1908	1825	1966	2013	1964	3135	3260	3064	3100	3188	6332	6272	6577	6464	6451	9602	9536	9683	9582	9564	12849	12620	13009	12763	12728		575	354	372	366	370	377	584	584	591	588	605	1210	1187	1176	1203	1254	1821	1808	1828	1834	1821	2460	2434
576	1909	1832	1969	2021	1968	3151	3271	3073	3106	3198	6360	6298	6607	6486	6464	9647	9566	9730	9626	9610	12893	12665	13052	12799	12767		576	355	372	367	370	377	584	584	592	588	605	1210	1187	1177	1203	1254	1818	1809	1829	1836	1825	2461	2436
577	1917	1837	1979	2030	1976	3163	3286	3086	3115	3212	6385	6319	6633	6515	6485	9689	9603	9763	9660	9649	12961	12700	13102	12849	12813		577	355	372	366	370	377	586	584	592	589	606	1210	1188	1178	1204	1254	1819	1818	1830	1836	1826	2460	2437
578	1920	1845	1991	2039	1985	3172	3297	3105	3128	3220	6402	6347	6655	6536	6509	9731	9637	9796	9695	9685	13019	12737	13156	12896	12854		578	355	371	366	370	377	586	583	592	589	607	1210	1189	1178	1205	1255	1821	1822	1836	1840	1827	2462	2441
579	1929	1852	1998	2047	1997	3181	3313	3116	3142	3233	6424	6369	6670	6560	6527	9758	9669	9825	9724	9727	13070	12777	13220	12943	12896		579	355	371	366	370	377	586	584	593	589	607	1210	1189	1179	1205	1255	1824	1826	1838	1841	1828	2462	2442
580	1939	1858	2005	2052	2009	3191	3327	3125	3153	3244	6444	6389	6694	6596	6546	9795	9698	9852	9766	9765	13122	12830	13252	12986	12927		580	355	372	368	371	377	586	583	593	589	609	1210	1189	1182	1206	1255	1825	1833	1838	1842	1827	2462	2442
581	1943	1863	2011	2060	2016	3201	3332	3135	3164	3251	6469	6406	6717	6625	6568	9830	9724	9883	9801	9804	13162	12860	13295	13040	12977		581	355	372	368	371	377	586	583	593	590	609	1212	1190	1182	1206	1255	1825	1836	1839	1844	1827	2464	2444
582	1951	1870	2017	2067	2024	3212	3339	3145	3179	3261	6495	6432	6738	6654	6597	9868	9754	9913	9833	9830	13208	12906	13344	13097	13027		582	355	372	367	371	377	587	584	595	591	609	1214	1191	1183	1209	1256	1827	1837	1840	1844	1829	2465	2446
583	1954	1871	2028	2072	2032	3224	3343	3159	3193	3272	6518	6466	6762	6679	6620	9893	9798	9946	9878	9864	13248	12947	13394	13141	13070		583	355	372	367	371	377	587	584	595	591	610	1216	1191	1183	1209	1256	1827	1839	1843	1845	1831	2467	2446
584	1963	1879	2037	2078	2040	3236	3356	3171	3201	3278	6555	6492	6784	6700	6641	9931	9840	9983	9914	9900	13286	13002	13435	13188	13124		584	355	373	367	371	377	587	584	597	591	609	1216	1192	1185	1212	1257	1827	1838	1843	1845	1833	2470	2449
585	1968	1890	2047	2088	2048	3249	3372	3179	3218	3286	6577	6516	6810	6734	6657	9975	9872	10024	9947	9937	13346	13044	13490	13237	13170		585	355	373	367	372	377	587	584	597	591	610	1216	1193	1185	1213	1258	1827	1839	1848	1844	1836	2472	2455
586	1976	1895	2047	2097	2057	3259	3386	3191	3225	3295	6598	6550	6823	6754	6686	10007	9911	10065	9980	9969	13403	13091	13538	13275	13227		586	355	372	368	373	377	587	584	598	589	611	1216	1196	1185	1215	1259	1828	1839	1850	1844	1837	2473	2455
587	1981	1900	2051	2102	2062	3277	3399	3198	3238	3306	6629	6580	6842	6782	6711	10049	9958	10101	10016	9999	13452	13135	13583	13317	13280		587	356	372	368	373	377	588	584	601	589	612	1216	1195	1188	1215	1258	1831	1840	1850	1848	1839	2474	2458
588	1991	1908	2057	2107	2073	3285	3409	3208	3246	3325	6653	6610	6865	6806	6733	10087	9990	10150	10061	10023	13497	13182	13627	13359	13323		588	356	372	369	373	377	589	584	605	589	611	1218	1195	1191	1216	1260	1832	1843	1854	1849	1839	2477	2459
589	1995	1915	2067	2114	2075	3295	3418	3216	3256	3335	6680	6635	6885	6827	6753	10119	10017	10187	10096	10059	13550	13227	13672	13408	13363		589	356	372	369	373	378	589	584	606	590	611	1219	1195	1194	1217	1261	1834	1845	1856	1854	1840	2480	2460
590	2003	1926	2072	2120	2082	3306	3428	3234	3270	3345	6702	6654	6910	6854	6776	10156	10054	10242	10138	10105	13600	13268	13726	13442	13405		590	356	372	369	374	378	589	584	606	591	611	1222	1196	1197	1218	1263	1836	1846	1856	1854	1842	2483	2462
591	2009	1931	2081	2132	2088	3321	3442	3254	3284	3359	6727	6671	6933	6877	6808	10182	10084	10275	10172	10135	13652	13311	13774	13488	13462		591	356	372	369	374	378	589	584	605	592	611	1222	1195	1196	1219	1263	1836	1851	1857	1854	1846	2486	2463
592	2019	1939	2087	2136	2095	3336	3459	3268	3298	3368	6758	6698	6957	6913	6829	10217	10113	10315	10204	10174	13707	13367	13820	13550	13512		592	356	372	370	375	379	591	584	605	592	611	1227	1196	1195	1219	1266	1837	1852	1857	1857	1848	2490	2465
593	2029	1947	2097	2142	2102	3347	3466	3279	3310	3378	6789	6716	6973	6939	6851	10255	10150	10358	10245	10216	13746	13419	13868	13599	13551		593	356	373	371	376	379	591	584	605	593	611	1228	1196	1195	1219	1266	1839	1851	1858	1860	1848	2492	2466
594	2035	1954	2108	2150	2112	3366	3481	3288	3324	3390	6811	6743	7001	6961	6868	10287	10177	10393	10286	10246	13789	13468	13927	13646	13601		594	355	373	371	377	380	592	586	605	595	611	1228	1195	1199	1219	1268	1840	1852	1863	1860	1848	2493	2471
595	2042	1964	2119	2160	2120	3385	3496	3305	3337	3399	6842	6763	7026	6987	6886	10322	10211	10427	10324	10289	13833	13510	13968	13702	13655		595	356	373	371	377	380	592	586	605	595	611	1228	1196	1200	1219	1271	1841	1851	1863	1866	1850	2494	2473
596	2051	1978	2130	2169	2124	3396	3511	3316	3346	3406	6864	6789	7057	7017	6910	10352	10243	10454	10354	10328	13898	13564	14023	13758	13708		596	357	373	371	379	380	592	586	605	596	612	1228	1195	1200	1222	1273	1846	1853	1865	1867	1851	2495	2476
597	2060	1981	2139	2183	2132	3410	3528	3328	3358	3413	6895	6811	7086	7033	6928	10392	10282	10485	10398	10368	13945	13614	14067	13803	13752		597	357	375	371	383	380	594	588	605	597	612	1228	1196	1204	1223	1273	1849	1854	1866	1870	1853	2495	2476
598	2067	1985	2145	2190	2138	3419	3544	3338	3372	3421	6922	6841	7108	7057	6942	10431	10317	10525	10428	10405	13984	13653	14106	13848	13811		598	357	375	371	384	380	594	589	605	597	615	1231	1196	1206	1225	1277	1852	1858	1867	1870	1855	2502	2480
599	2074	1995	2152	2203	2145	3431	3555	3350	3386	3431	6938	6870	7132	7083	6971	10469	10362	10570	10467	10445	14034	13698	14161	13904	13853		599	358	375	371	384	380	594	589	604	597	614	1231	1197	1208	1226	1278	1855	1859	1868	1872	1856	2506	2482
600	2082	2007	2159	2206	2154	3439	3565	3358	3392	3439	6975	6900	7161	7111	6999	10514	10398	10608	10501	10494	14072	13743	14204	13964	13905		600	358	374	371	384	381	596	589	606	598	614	1232	1198	1210	1228	1280	1858	1862	1874	1881	1859	2506	2483
601	2085	2015	2169	2218	2161	3458	3575	3374	3403	3455	6998	6918	7179	7140	7021	10547	10438	10654	10546	10534	14115	13792	14259	14009	13954		601	359	373	372	384	383	596	589	610	599	616	1231	1199	1211	1230	1282	1857	1862	1879	1883	1862	2513	2485
602	2092	2023	2175	2221	2169	3469	3594	3388	3413	3472	7032	6944	7210	7163	7042	10585	10469	10704	10575	10580	14165	13858	14316	14053	14002		602	360	373	372	384	383	598	590	611	599	615	1233	1202	1212	1233	1281	1858	1865	1881	1884	1862	2516	2486
603	2099	2030	2182	2230	2177	3479	3606	3398	3421	3480	7058	6966	7235	7188	7068	10617	10503	10740	10607	10626	14219	13899	14371	14109	14068		603	360	373	372	383	383	598	590	611	599	615	1236	1203	1212	1234	1281	1859	1866	1881	1887	1863	2517	2488
604	2106	2033	2191	2236	2184	3489	3621	3405	3442	3489	7081	6995	7267	7219	7089	10667	10554	10782	10643	10667	14261	13963	14408	14177	14121		604	360	373	372	383	385	601	593	613	599	615	1237	1204	1212	1237	1281	1860	1867	1881	1887	1864	2519	2490
605	2120	2036	2196	2247	2190	3502	3633	3416	3458	3499	7109	7016	7294	7236	7118	10701	10589	10821	10689	10704	14311	14004	14451	14237	14171		605	361	374	373	382	385	602	593	615	599	616	1239	1204	1212	1238	1282	1863	1868	1882	1888	1865	2517	2490
606	2128	2039	2202	2262	2200	3517	3645	3428	3472	3507	7134	7048	7326	7262	7143	10750	10634	10853	10723	10730	14361	14060	14509	14286	14217		606	360	375	373	383	386	603	593	615	599	616	1239	1206	1212	1241	1282	1861	1868	1887	1890	1869	2520	2493
607	2134	2050	2212	2268	2206	3531	3655	3439	3489	3522	7153	7070	7358	7280	7162	10798	10677	10894	10757	10760	14427	14105	14562	14357	14272		607	360	375	373	383	386	603	592	615	599	616	1238	1208	1213	1242	1283	1862	1869	1887	1891	1872	2525	2494
608	2142	2061	2219	2281	2217	3544	3667	3458	3501	3539	7177	7096	7390	7296	7189	10826	10713	10937	10793	10806	14475	14153	14619	14427	14324		608	360	375	373	383	387	603	593	615	599	617	1239	1212	1217	1244	1285	1863	1871	1888	1895	1871	2525	2495
609	2155	2064	2227	2289	2225	3557	3675	3465	3515	3546	7204	7111	7418	7326	7224	10864	10760	10984	10837	10856	14524	14197	14662	14479	14371		609	361	376	373	383	387	603	593	615	599	618	1240	1213	1217	1244	1287	1865	1871	1891	1897	1871	2526	2498
610	2162	2066	2232	2299	2238	3575	3690	3473	3526	3558	7225	7136	7447	7343	7242	10906	10797	11019	10876	10904	14576	14256	14723	14527	14427		610	362	376	373	383	387	604	596	615	600	619	1242	1215	1220	1250	1288	1869	1872	1897	1899	1873	2528	2503
611	2175	2073	2237	2301	2245	3586	3704	3478	3539	3567	7246	7155	7480	7358	7276	10951	10843	11048	10924	10946	14628	14303	14762	14579	14484		611	362	376	373	383	387	604	598	615	601	619	1242	1217	1221	1252	1287	1870	1876	1901	1898	1875	2528	2503
612	2186	2076	2246	2311	2252	3593	3716	3491	3549	3583	7277	7187	7501	7379	7300	10994	10883	11089	10945	10981	14696	14343	14822	14636	14555		612	364	377	373	384	388	604	600	614	602	619	1242	1220	1226	1252	1287	1869	1878	1902	1898	1880	2527	2503
613	2196	2083	2253	2318	2258	3607	3737	3499	3562	3599	7296	7210	7531	7405	7325	11033	10925	11131	10979	11012	14749	14399	14873	14697	14627		613	364	378	373	383	389	604	601	615	603	618	1243	1221	1226	1252	1289	1875	1881	1902	1900	1880	2528	2504
614	2205	2090	2260	2323	2265	3622	3746	3522	3579	3608	7328	7232	7564	7432	7355	11066	10969	11166	11013	11054	14817	14452	14938	14747	14660		614	364	378	374	385	390	604	602	615	603	620	1247	1224	1227	1256	1290	1876	1882	1905	1902	1881	2528	2506
615	2212	2097	2267	2327	2273	3635	3762	3527	3596	3623	7354	7252	7585	7470	7381	11111	11006	11203	11046	11097	14891	14522	14977	14795	14722		615	364	378	374	386	390	604	602	617	603	620	1250	1224	1227	1259	1292	1877	1885	1909	1905	1887	2531	2507
616	2219	2107	2271	2336	2284	3650	3774	3541	3606	3637	7372	7280	7618	7508	7406	11165	11056	11254	11079	11140	14966	14577	15035	14851	14779		616	364	378	375	386	390	605	602	617	603	622	1252	1224	1228	1261	1293	1881	1886	1910	1908	1888	2534	2507
617	2222	2117	2282	2342	2288	3667	3784	3554	3619	3653	7384	7309	7659	7524	7429	11206	11095	11298	11114	11183	15006	14631	15081	14899	14832		617	364	378	375	388	390	604	602	617	605	624	1252	1224	1228	1262	1294	1885	1892	1912	1912	1893	2533	2507
618	2229	2125	2291	2354	2295	3679	3805	3565	3631	3666	7420	7335	7692	7551	7460	11247	11162	11338	11156	11231	15059	14693	15133	14949	14889		618	364	378	375	388	390	604	602	617	607	625	1253	1226	1231	1262	1295	1887	1894	1914	1916	1893	2537	2512
619	2239	2139	2305	2359	2305	3693	3817	3579	3641	3681	7455	7368	7723	7579	7486	11287	11197	11370	11211	11261	15130	14746	15196	14997	14937		619	366	379	375	388	391	605	602	618	607	625	1256	1227	1233	1263	1294	1891	1895	1914	1920	1897	2541	2515
620	2246	2147	2307	2371	2309	3708	3826	3593	3658	3696	7481	7395	7756	7613	7514	11338	11238	11414	11241	11297	15181	14803	15258	15056	14992		620	366	380	376	388	392	605	602	618	607	626	1258	1229	1233	1263	1294	1895	1894	1916	1921	1899	2545	2519
621	2255	2151	2312	2381	2316	3725	3841	3605	3683	3704	7507	7424	7789	7639	7536	11380	11272	11462	11278	11333	15247	14879	15324	15115	15044		621	366	380	376	389	392	605	603	619	606	628	1258	1231	1233	1263	1295	1897	1894	1918	1920	1901	2548	2519
622	2263	2157	2327	2393	2319	3738	3852	3619	3694	3715	7537	7453	7828	7670	7568	11424	11308	11500	11325	11369	15299	14936	15375	15175	15111		622	366	379	376	389	392	606	603	619	607	629	1258	1232	1234	1262	1299	1899	1895	1921	1924	1901	2550	2521
623	2269	2161	2334	2398	2329	3751	3868	3626	3714	3725	7566	7477	7863	7697	7601	11452	11363	11536	11371	11399	15337	14997	15430	15216	15153		623	366	379	379	390	392	606	603	620	608	629	1261	1231	1237	1264	1302	1902	1895	1925	1925	1903	2550	2524
624	2277	2169	2342	2406	2333	3766	3883	3638	3720	3737	7600	7505	7895	7726	7635	11486	11409	11573	11414	11451	15391	15038	15477	15270	15208		624	366	379	379	390	393	606	603	623	609	628	1263	1234	1241	1267	1307	1906	1897	1927	1926	1903	2551	2527
625	2283	2172	2353	2410	2338	3780	3896	3647	3733	3754	7624	7531	7926	7759	7664	11537	11448	11612	11444	11482	15445	15091	15536	15309	15253		625	366	381	379	390	393	608	603	624	608	629	1263	1236	1241	1268	1307	1908	1900	1933	1927	1905	2552	2528
626	2292	2179	2362	2420	2350	3796	3905	3660	3746	3768	7653	7555	7947	7787	7686	11600	11487	11659	11488	11530	15501	15147	15601	15372	15308		626	366	380	379	390	394	610	606	626	609	629	1266	1236	1243	1268	1310	1909	1899	1935	1929	1906	2557	2532
627	2299	2189	2378	2425	2355	3808	3916	3678	3753	3783	7674	7592	7986	7809	7712	11640	11527	11701	11533	11571	15558	15192	15650	15429	15370		627	366	381	380	390	394	611	606	629	610	629	1266	1236	1245	1270	1311	1910	1900	1937	1934	1910	2562	2531
628	2305	2197	2386	2434	2367	3824	3936	3692	3767	3793	7700	7626	8014	7836	7745	11685	11566	11733	11577	11612	15633	15237	15688	15494	15437		628	366	381	382	390	394	611	607	630	610	629	1267	1239	1248	1271	1315	1910	1902	1938	1936	1911	2564	2532
629	2312	2205	2397	2441	2374	3839	3950	3702	3783	3806	7721	7654	8051	7861	7769	11725	11608	11764	11611	11660	15693	15273	15748	15538	15491		629	366	381	382	390	394	613	610	630	611	630	1267	1240	1249	1272	1316	1911	1910	1940	1938	1911	2567	2535
630	2324	2212	2402	2453	2381	3851	3961	3716	3796	3823	7748	7671	8081	7894	7793	11750	11645	11810	11656	11699	15754	15326	15807	15594	15546		630	367	381	382	390	395	613	611	630	611	630	1270	1240	1251	1274	1316	1918	1912	1941	1943	1914	2571	2535
631	2332	2218	2411	2465	2389	3862	3979	3728	3810	3835	7782	7700	8109	7918	7817	11793	11685	11852	11705	11752	15815	15388	15865	15656	15602		631	368	382	382	392	396	614	609	630	612	629	1272	1241	1254	1273	1318	1919	1917	1944	1948	1916	2571	2538
632	2340	2225	2421	2473	2402	3876	3993	3746	3824	3842	7795	7726	8143	7943	7840	11826	11728	11904	11760	11790	15856	15439	15922	15710	15667		632	368	383	382	394	398	614	610	630	614	630	1272	1242	1255	1276	1318	1922	1921	1946	1950	1918	2574	2540
633	2347	2235	2429	2481	2409	3898	4007	3759	3838	3858	7825	7757	8184	7972	7857	11873	11773	11941	11795	11827	15922	15496	15979	15766	15719		633	368	383	382	395	398	614	610	632	615	630	1274	1245	1256	1280	1319	1923	1922	1951	1950	1919	2579	2542
634	2353	2243	2443	2489	2417	3914	4027	3770	3846	3872	7859	7788	8203	8012	7877	11923	11804	11979	11838	11879	15988	15540	16025	15818	15770		634	368	383	384	394	401	614	612	632	616	630	1276	1248	1256	1281	1321	1925	1925	1955	1954	1920	2580	2547
635	2361	2252	2444	2496	2422	3927	4047	3790	3863	3884	7878	7815	8237	8034	7905	11955	11845	12028	11881	11925	16038	15601	16076	15852	15828		635	368	382	384	395	400	614	612	632	616	630	1276	1251	1257	1284	1321	1932	1927	1961	1955	1922	2585	2551
636	2373	2261	2455	2504	2429	3944	4064	3807	3875	3899	7898	7845	8267	8063	7935	12004	11881	12083	11939	11967	16088	15662	16125	15903	15890		636	368	382	384	395	402	616	612	635	617	630	1278	1252	1259	1286	1321	1936	1930	1964	1958	1923	2590	2554
637	2386	2272	2464	2509	2442	3962	4083	3824	3880	3913	7925	7875	8296	8097	7954	12050	11918	12149	11969	12004	16139	15725	16190	15960	15937		637	369	382	384	398	402	616	613	636	618	630	1279	1253	1259	1289	1324	1937	1932	1966	1963	1923	2595	2556
638	2397	2278	2475	2520	2448	3979	4098	3837	3887	3928	7943	7896	8332	8129	7988	12091	11961	12195	12017	12048	16202	15788	16257	16004	16007		638	370	382	384	399	404	616	613	637	617	634	1281	1256	1263	1292	1327	1938	1934	1968	1966	1923	2602	2558
639	2403	2288	2482	2526	2462	3994	4115	3849	3904	3943	7981	7925	8360	8156	8018	12136	12022	12240	12053	12091	16249	15851	16317	16073	16062		639	370	382	384	401	407	616	613	637	618	635	1282	1259	1265	1296	1329	1940	1936	1970	1967	1923	2605	2561
640	2408	2299	2490	2532	2469	4014	4133	3867	3920	3957	8010	7967	8392	8187	8048	12185	12078	12274	12087	12127	16301	15912	16381	16135	16121		640	371	383	384	402	407	616	613	637	618	635	1286	1260	1265	1295	1329	1940	1940	1976	1969	1924	2605	2565
641	2414	2304	2499	2538	2478	4027	4154	3882	3926	3974	8035	7994	8427	8222	8084	12235	12118	12324	12135	12173	16349	15961	16432	16179	16192		641	372	385	385	402	409	620	614	637	617	636	1289	1261	1270	1295	1331	1942	1941	1983	1970	1926	2613	2568
642	2422	2313	2506	2550	2485	4043	4171	3891	3938	3986	8063	8027	8455	8262	8107	12282	12159	12392	12180	12234	16419	16020	16503	16232	16255		642	372	385	385	403	409	620	615	637	617	639	1291	1264	1271	1298	1332	1942	1943	1982	1974	1932	2617	2569
643	2436	2320	2514	2554	2491	4059	4184	3906	3955	4010	8099	8055	8489	8286	8140	12315	12195	12432	12222	12297	16472	16098	16576	16301	16308		643	374	385	385	403	409	622	615	638	617	639	1295	1265	1270	1300	1333	1941	1943	1985	1974	1933	2617	2569
644	2444	2326	2529	2560	2503	4066	4195	3919	3968	4025	8126	8090	8527	8309	8156	12355	12241	12489	12257	12342	16529	16150	16638	16362	16363		644	374	386	385	405	409	624	616	639	618	641	1294	1265	1271	1302	1333	1945	1947	1984	1977	1934	2619	2571
645	2453	2332	2537	2570	2510	4082	4211	3941	3985	4044	8158	8122	8551	8344	8186	12394	12282	12543	12289	12392	16607	16212	16699	16433	16420		645	374	386	385	407	409	625	618	639	618	642	1295	1268	1275	1302	1333	1951	1947	1990	1979	1934	2626	2575
646	2468	2337	2544	2584	2520	4094	4221	3967	4002	4060	8187	8154	8582	8368	8213	12445	12318	12595	12337	12434	16667	16270	16752	16491	16482		646	374	386	385	407	409	625	618	640	617	641	1298	1269	1276	1302	1333	1951	1946	1994	1980	1937	2628	2577
647	2477	2346	2552	2595	2526	4105	4235	3979	4012	4078	8201	8185	8613	8387	8252	12488	12369	12651	12386	12482	16734	16332	16813	16542	16539		647	376	387	384	407	411	626	618	639	617	642	1301	1271	1277	1303	1335	1953	1949	1996	1983	1939	2631	2582
648	2488	2351	2558	2610	2534	4122	4251	3985	4023	4090	8240	8221	8648	8421	8282	12531	12426	12701	12435	12514	16788	16390	16856	16604	16604		648	376	388	384	408	412	626	618	639	618	642	1301	1271	1279	1306	1338	1958	1954	1997	1984	1943	2633	2582
649	2496	2354	2564	2619	2543	4137	4267	3996	4031	4105	8270	8256	8672	8455	8310	12589	12469	12742	12482	12565	16847	16453	16923	16684	16659		649	378	388	385	408	412	626	618	638	617	645	1302	1271	1281	1307	1338	1960	1958	1997	1988	1946	2638	2587
650	2507	2359	2570	2627	2553	4153	4280	4020	4048	4129	8304	8290	8696	8484	8332	12637	12504	12797	12526	12601	16912	16506	16991	16740	16731		650	379	388	384	408	412	626	618	638	619	647	1303	1272	1281	1307	1339	1962	1960	1998	1989	1948	2645	2589
651	2518	2365	2574	2635	2560	4167	4290	4043	4062	4141	8332	8319	8726	8512	8362	12678	12542	12837	12567	12646	16964	16575	17052	16798	16805		651	380	388	384	408	412	625	620	638	619	647	1306	1273	1281	1307	1342	1962	1961	2000	1993	1953	2647	2592
652	2532	2375	2583	2642	2567	4177	4304	4058	4080	4159	8361	8351	8749	8538	8400	12708	12584	12902	12616	12703	17021	16631	17124	16860	16863		652	380	388	384	408	412	625	621	638	620	648	1306	1271	1281	1310	1342	1963	1963	2003	1994	1956	2653	2598
653	2538	2388	2597	2654	2580	4190	4316	4073	4095	4171	8394	8381	8777	8572	8422	12745	12620	12944	12650	12744	17065	16709	17195	16917	16919		653	380	389	384	408	414	625	622	638	621	648	1309	1273	1281	1311	1346	1964	1968	2005	2002	1961	2656	2604
654	2548	2394	2605	2661	2591	4210	4333	4091	4113	4188	8422	8412	8804	8602	8450	12787	12670	12986	12704	12794	17138	16779	17260	16971	16979		654	381	389	387	409	414	626	622	640	623	650	1309	1273	1283	1311	1349	1966	1970	2007	2003	1967	2662	2605
655	2551	2405	2619	2677	2600	4219	4345	4101	4129	4209	8450	8438	8834	8644	8490	12836	12730	13041	12739	12843	17194	16847	17324	17045	17036		655	382	389	388	409	414	628	624	641	623	651	1309	1275	1284	1311	1349	1966	1970	2007	2004	1971	2666	2605
656	2556	2410	2630	2685	2606	4235	4359	4115	4150	4225	8476	8469	8859	8668	8516	12878	12782	13089	12781	12893	17255	16932	17393	17113	17099		656	382	389	388	410	414	629	624	641	626	651	1312	1275	1284	1314	1350	1971	1973	2007	2006	1974	2669	2604
657	2568	2416	2639	2699	2616	4248	4374	4135	4178	4244	8522	8492	8898	8686	8556	12913	12833	13126	12822	12947	17311	16993	17452	17183	17164		657	382	390	388	411	415	628	623	641	627	652	1311	1275	1285	1316	1350	1973	1973	2011	2011	1976	2670	2605
658	2577	2423	2652	2710	2631	4260	4398	4149	4192	4256	8556	8538	8934	8720	8575	12954	12879	13168	12867	12991	17378	17054	17519	17262	17231		658	382	391	388	414	415	628	623	643	628	653	1313	1277	1287	1318	1352	1974	1976	2012	2013	1978	2672	2607
659	2583	2427	2661	2724	2637	4271	4412	4164	4207	4267	8589	8561	8964	8755	8601	12995	12928	13217	12917	13033	17444	17110	17587	17338	17296		659	383	393	389	416	415	628	623	643	628	653	1318	1281	1289	1318	1354	1974	1976	2015	2014	1983	2676	2608
660	2593	2437	2671	2737	2647	4289	4425	4180	4218	4284	8614	8588	8996	8792	8634	13041	12975	13259	12969	13076	17504	17161	17647	17398	17362		660	385	393	391	416	415	629	623	646	629	653	1318	1282	1292	1321	1355	1978	1977	2025	2015	1986	2685	2614
661	2603	2445	2683	2744	2664	4301	4440	4189	4233	4303	8650	8620	9030	8822	8661	13098	13026	13309	13017	13119	17587	17223	17698	17447	17414		661	385	394	392	416	417	629	623	648	630	656	1319	1283	1295	1323	1361	1980	1978	2027	2016	1987	2689	2616
662	2609	2453	2697	2750	2675	4319	4452	4198	4253	4326	8686	8659	9057	8848	8695	13148	13075	13352	13053	13168	17657	17282	17768	17512	17486		662	385	395	392	417	417	629	623	648	630	657	1322	1286	1296	1325	1363	1982	1982	2027	2017	1989	2690	2616
663	2615	2463	2709	2756	2683	4336	4464	4212	4265	4345	8717	8700	9089	8878	8725	13192	13119	13400	13098	13215	17728	17351	17817	17594	17540		663	384	395	392	417	417	629	623	649	631	657	1329	1288	1296	1325	1362	1983	1984	2025	2016	1989	2693	2617
664	2624	2470	2717	2765	2698	4352	4473	4229	4278	4359	8753	8733	9126	8907	8752	13231	13176	13441	13158	13275	17814	17419	17879	17650	17605		664	385	396	395	418	417	630	624	649	631	657	1330	1288	1296	1328	1361	1985	1985	2025	2017	1993	2693	2621
665	2636	2481	2727	2769	2701	4368	4483	4247	4293	4378	8793	8772	9155	8939	8786	13278	13217	13489	13202	13319	17875	17497	17941	17713	17668		665	385	396	395	418	417	630	624	651	631	656	1332	1292	1296	1328	1363	1987	1986	2027	2021	1996	2695	2623
666	2643	2487	2740	2777	2708	4382	4510	4258	4302	4396	8818	8803	9189	8965	8826	13332	13272	13549	13254	13376	17938	17563	18026	17780	17732		666	386	397	395	418	418	628	627	652	633	657	1332	1294	1297	1330	1364	1994	1987	2029	2023	1996	2693	2625
667	2648	2496	2748	2785	2716	4393	4539	4279	4319	4415	8846	8849	9222	8991	8852	13387	13325	13596	13287	13426	18008	17641	18090	17829	17809		667	386	397	395	419	418	629	627	652	634	658	1333	1299	1297	1333	1364	1997	1988	2031	2026	1995	2694	2627
668	2655	2509	2753	2793	2726	4410	4559	4296	4336	4438	8880	8880	9255	9014	8888	13438	13384	13634	13334	13472	18065	17705	18140	17883	17877		668	389	397	395	421	418	630	627	653	634	660	1332	1300	1301	1334	1364	1998	1991	2034	2029	1999	2698	2627
669	2666	2517	2759	2800	2734	4423	4579	4310	4352	4458	8919	8924	9288	9048	8920	13483	13447	13680	13373	13509	18133	17762	18220	17934	17940		669	391	398	395	421	420	632	628	653	634	660	1332	1301	1301	1337	1370	2004	1997	2041	2034	2000	2701	2630
670	2680	2522	2763	2813	2742	4442	4593	4330	4364	4474	8943	8956	9325	9085	8955	13528	13493	13718	13423	13559	18203	17836	18297	18008	18009		670	391	398	395	422	420	632	628	654	634	661	1333	1300	1302	1340	1371	2005	2001	2044	2034	2001	2704	2633
671	2694	2528	2773	2825	2753	4458	4606	4347	4376	4494	8979	8993	9358	9110	8987	13580	13559	13772	13469	13611	18270	17903	18361	18065	18071		671	391	398	395	422	420	632	630	654	635	661	1337	1302	1303	1342	1372	2011	2001	2048	2036	2004	2706	2639
672	2700	2549	2782	2839	2767	4467	4620	4364	4386	4512	9004	9020	9401	9138	9025	13625	13593	13836	13523	13639	18338	17986	18435	18126	18159		672	391	398	395	422	420	633	632	656	636	661	1337	1304	1304	1345	1372	2010	2001	2050	2038	2007	2708	2641
673	2709	2553	2790	2850	2778	4485	4639	4376	4402	4534	9037	9054	9430	9171	9058	13680	13645	13885	13564	13685	18400	18061	18505	18197	18233		673	391	398	395	422	420	633	632	657	636	661	1339	1305	1306	1346	1375	2010	2004	2050	2039	2009	2713	2646
674	2715	2559	2800	2859	2788	4492	4654	4390	4416	4543	9058	9074	9463	9200	9097	13717	13687	13939	13616	13737	18479	18136	18560	18272	18294		674	391	398	397	422	420	633	633	657	638	661	1340	1305	1308	1346	1376	2013	2008	2051	2039	2012	2713	2652
675	2728	2566	2811	2865	2798	4512	4663	4406	4437	4555	9088	9109	9501	9233	9126	13770	13735	13981	13673	13792	18554	18211	18626	18345	18359		675	392	398	399	423	420	634	633	657	638	661	1341	1305	1310	1349	1379	2016	2011	2053	2044	2017	2715	2659
676	2742	2576	2822	2875	2811	4530	4686	4431	4442	4574	9126	9146	9532	9274	9161	13819	13791	14023	13732	13845	18611	18277	18687	18416	18410		676	393	399	400	424	420	635	635	657	640	662	1344	1308	1312	1355	1379	2017	2014	2061	2048	2019	2722	2661
677	2758	2586	2837	2882	2821	4550	4694	4446	4457	4587	9160	9185	9571	9305	9196	13871	13846	14066	13780	13900	18677	18334	18758	18478	18486		677	393	400	401	424	420	634	637	657	639	664	1345	1313	1312	1357	1380	2020	2015	2062	2049	2024	2725	2663
678	2769	2592	2842	2894	2832	4566	4710	4460	4477	4608	9200	9210	9605	9336	9244	13938	13883	14134	13820	13947	18747	18401	18826	18546	18547		678	393	400	404	424	421	635	639	658	640	664	1347	1313	1312	1358	1383	2019	2017	2064	2050	2026	2726	2663
679	2786	2605	2850	2909	2842	4579	4728	4472	4494	4630	9235	9242	9637	9375	9282	13980	13940	14193	13881	13990	18811	18465	18906	18607	18610		679	393	400	406	425	422	637	639	660	640	663	1347	1314	1315	1360	1386	2020	2018	2066	2053	2029	2734	2666
680	2792	2619	2863	2917	2851	4595	4748	4492	4509	4646	9267	9280	9664	9428	9327	14039	13990	14245	13937	14033	18894	18531	18980	18682	18690		680	394	401	407	425	422	637	639	661	640	663	1351	1313	1317	1362	1389	2025	2020	2071	2055	2033	2738	2671
681	2797	2628	2876	2932	2860	4616	4764	4511	4527	4661	9302	9312	9692	9458	9367	14090	14054	14288	13982	14077	18974	18613	19051	18737	18756		681	395	401	407	426	423	637	640	663	644	664	1353	1312	1317	1365	1389	2025	2021	2073	2057	2036	2743	2675
682	2808	2641	2888	2939	2875	4637	4776	4533	4537	4680	9335	9346	9730	9503	9392	14143	14108	14341	14015	14129	19027	18687	19143	18807	18821		682	395	401	407	426	423	637	642	663	645	666	1358	1313	1318	1366	1391	2027	2022	2074	2057	2043	2745	2678
683	2821	2651	2899	2951	2893	4652	4797	4548	4551	4695	9370	9385	9765	9542	9427	14202	14161	14391	14074	14187	19106	18751	19197	18883	18884		683	395	402	408	426	424	640	642	666	645	666	1359	1313	1321	1367	1391	2029	2025	2074	2058	2045	2752	2682
684	2838	2659	2912	2958	2905	4671	4817	4569	4563	4713	9409	9416	9804	9567	9459	14252	14213	14447	14114	14245	19181	18813	19270	18948	18947		684	395	403	408	427	424	641	643	667	645	666	1361	1317	1324	1367	1397	2027	2033	2075	2059	2049	2756	2683
685	2849	2665	2922	2974	2913	4676	4832	4595	4576	4728	9441	9460	9858	9608	9497	14311	14266	14502	14164	14303	19258	18883	19339	19007	19030		685	395	404	408	428	424	641	643	667	645	667	1363	1317	1325	1366	1398	2031	2038	2078	2062	2053	2762	2689
686	2859	2671	2934	2985	2922	4694	4859	4617	4590	4747	9465	9494	9896	9649	9536	14360	14316	14556	14218	14361	19318	18961	19404	19069	19106		686	395	405	408	428	424	641	643	667	645	669	1364	1318	1326	1368	1401	2029	2043	2080	2063	2058	2766	2693
687	2868	2679	2947	2995	2931	4720	4882	4639	4606	4758	9510	9529	9935	9679	9564	14419	14368	14606	14274	14416	19396	19023	19477	19144	19181		687	395	405	408	428	424	641	644	667	645	669	1365	1322	1326	1367	1403	2030	2043	2084	2061	2062	2770	2699
688	2885	2689	2959	3005	2938	4740	4908	4653	4619	4772	9543	9568	9977	9723	9601	14477	14421	14652	14325	14470	19468	19107	19549	19217	19262		688	396	407	409	429	424	641	644	668	647	672	1368	1322	1327	1370	1405	2032	2045	2086	2069	2064	2771	2706
689	2899	2700	2963	3011	2951	4765	4925	4671	4634	4791	9564	9612	10014	9762	9641	14532	14467	14700	14384	14524	19551	19179	19630	19268	19337		689	396	406	410	433	424	642	646	668	647	673	1369	1323	1329	1372	1409	2031	2047	2088	2072	2065	2771	2711
690	2916	2710	2967	3021	2963	4781	4941	4691	4652	4811	9597	9637	10053	9796	9674	14596	14509	14750	14435	14579	19608	19242	19697	19339	19431		690	395	406	410	435	426	642	647	668	647	673	1372	1325	1334	1372	1409	2032	2048	2087	2078	2072	2776	2715
691	2925	2720	2981	3035	2971	4800	4960	4708	4672	4831	9633	9662	10093	9836	9720	14640	14554	14801	14501	14634	19690	19336	19774	19389	19506		691	395	406	410	437	426	643	647	667	647	673	1373	1326	1336	1374	1409	2035	2055	2088	2081	2073	2783	2720
692	2940	2727	2994	3048	2981	4810	4976	4731	4685	4844	9664	9711	10131	9873	9758	14684	14600	14846	14554	14698	19752	19403	19847	19468	19552		692	394	405	410	437	426	643	649	667	647	674	1379	1327	1338	1376	1412	2036	2060	2090	2083	2075	2787	2723
693	2955	2731	3003	3060	2988	4821	4995	4745	4706	4866	9697	9750	10159	9900	9790	14745	14661	14888	14616	14771	19831	19474	19923	19539	19620		693	395	407	410	438	428	644	649	667	647	674	1379	1327	1339	1377	1412	2039	2062	2090	2085	2078	2792	2723
694	2976	2740	3018	3077	3002	4836	5020	4758	4734	4881	9738	9792	10187	9942	9841	14794	14714	14944	14673	14823	19899	19560	19991	19622	19690		694	395	408	411	439	428	644	650	667	647	674	1379	1328	1342	1377	1414	2041	2063	2097	2088	2081	2796	2728
695	2987	2754	3026	3087	3021	4863	5039	4773	4742	4895	9764	9816	10219	9981	9880	14835	14752	15008	14734	14873	19952	19629	20063	19712	19760		695	396	409	411	439	428	645	649	667	649	677	1382	1329	1343	1380	1415	2049	2068	2098	2090	2082	2801	2742
696	2995	2768	3038	3099	3039	4887	5058	4784	4761	4912	9792	9845	10267	10019	9916	14890	14797	15069	14792	14922	20023	19696	20139	19798	19832		696	396	409	413	439	428	647	652	666	650	682	1382	1329	1343	1380	1420	2051	2069	2101	2092	2086	2805	2744
697	3012	2781	3047	3111	3046	4906	5078	4799	4779	4928	9823	9870	10316	10060	9958	14944	14851	15123	14850	14971	20092	19754	20221	19874	19900		697	397	412	415	439	428	649	652	667	652	683	1382	1328	1344	1381	1420	2055	2070	2105	2096	2088	2809	2743
698	3024	2788	3054	3123	3060	4919	5095	4828	4797	4938	9865	9910	10352	10096	9996	15007	14912	15181	14908	15028	20167	19816	20291	19959	19964		698	397	412	415	439	428	649	654	668	652	683	1382	1329	1348	1383	1426	2057	2074	2110	2098	2089	2815	2746
699	3031	2802	3064	3135	3070	4932	5116	4851	4821	4962	9898	9945	10398	10133	10040	15066	14971	15230	14971	15091	20239	19888	20371	20033	20041		699	398	412	413	440	428	651	655	668	652	688	1387	1332	1349	1386	1427	2064	2076	2117	2103	2095	2819	2753
700	3042	2817	3078	3144	3087	4953	5136	4864	4837	4982	9929	9975	10433	10167	10076	15132	15031	15285	15033	15146	20313	19959	20450	20106	20117		700	399	412	412	439	428	652	657	668	652	687	1387	1333	1350	1386	1431	2065	2076	2119	2106	2095	2824	2754
701	3057	2823	3086	3152	3094	4973	5155	4880	4862	4995	9973	10021	10482	10206	10112	15190	15081	15347	15068	15195	20373	20041	20521	20183	20202		701	399	413	412	439	428	652	657	668	652	686	1387	1333	1351	1383	1432	2066	2078	2122	2108	2101	2827	2765
702	3067	2832	3098	3159	3104	4988	5173	4907	4875	5006	10012	10060	10526	10240	10154	15227	15141	15411	15114	15249	20442	20100	20610	20258	20276		702	401	413	412	440	428	655	660	668	654	688	1388	1335	1351	1388	1434	2071	2081	2126	2114	2103	2828	2769
703	3079	2843	3104	3176	3110	5011	5190	4925	4892	5026	10059	10097	10565	10286	10190	15283	15195	15480	15172	15306	20526	20161	20704	20336	20335		703	400	412	412	441	428	655	661	668	654	689	1389	1337	1353	1390	1435	2071	2084	2127	2117	2105	2836	2769
704	3091	2857	3113	3186	3121	5026	5207	4945	4906	5039	10111	10127	10611	10317	10222	15328	15265	15541	15240	15353	20599	20231	20780	20415	20414		704	400	413	412	441	431	657	661	668	654	691	1389	1339	1353	1391	1439	2073	2083	2131	2119	2106	2839	2773
705	3102	2870	3123	3199	3130	5047	5229	4955	4935	5055	10146	10162	10657	10352	10269	15391	15330	15600	15288	15403	20691	20294	20864	20485	20507		705	401	413	412	443	434	658	660	668	655	691	1391	1341	1355	1393	1439	2074	2085	2134	2123	2109	2848	2775
706	3110	2879	3137	3213	3139	5065	5257	4973	4956	5081	10178	10196	10700	10387	10311	15440	15384	15659	15350	15446	20755	20366	20925	20574	20568		706	402	413	412	443	433	658	659	668	659	693	1392	1343	1355	1394	1439	2073	2087	2135	2123	2114	2853	2777
707	3118	2888	3146	3225	3154	5087	5277	4991	4976	5103	10212	10235	10739	10423	10362	15491	15431	15718	15399	15499	20823	20439	21005	20662	20646		707	402	416	412	445	435	658	659	668	660	693	1394	1347	1356	1396	1439	2074	2091	2138	2124	2116	2858	2779
708	3125	2898	3164	3229	3163	5105	5301	5008	5002	5125	10246	10275	10775	10459	10400	15544	15499	15776	15460	15552	20891	20498	21062	20735	20725		708	403	416	412	446	435	657	660	667	660	693	1396	1348	1357	1396	1439	2079	2092	2142	2131	2117	2866	2787
709	3140	2904	3174	3241	3175	5131	5324	5025	5023	5151	10289	10313	10805	10497	10439	15602	15536	15828	15525	15621	20969	20566	21136	20809	20800		709	403	419	414	446	435	657	660	668	662	694	1398	1350	1358	1398	1441	2082	2095	2143	2138	2120	2871	2787
710	3155	2916	3195	3251	3186	5158	5339	5045	5041	5177	10325	10358	10847	10541	10489	15659	15590	15895	15600	15673	21049	20636	21202	20889	20894		710	404	420	416	446	435	657	660	668	664	694	1398	1350	1358	1399	1441	2082	2099	2146	2138	2119	2873	2791
711	3166	2921	3208	3264	3197	5178	5361	5062	5057	5198	10365	10400	10881	10586	10532	15701	15627	15954	15664	15733	21131	20718	21306	20960	20967		711	404	422	416	447	435	657	663	669	664	695	1400	1355	1359	1399	1446	2085	2103	2147	2140	2122	2877	2792
712	3177	2934	3219	3278	3217	5200	5376	5076	5085	5222	10402	10445	10918	10625	10562	15753	15672	16021	15710	15788	21221	20780	21398	21036	21038		712	404	422	416	447	435	657	664	669	665	695	1402	1359	1359	1403	1449	2089	2105	2149	2142	2125	2875	2793
713	3190	2941	3232	3296	3228	5223	5396	5093	5101	5245	10430	10496	10957	10660	10600	15808	15732	16077	15777	15852	21295	20871	21484	21106	21111		713	404	422	416	447	435	657	666	670	667	695	1411	1358	1361	1404	1450	2089	2110	2150	2149	2126	2880	2796
714	3206	2955	3243	3310	3241	5236	5419	5106	5127	5266	10479	10532	11000	10694	10640	15869	15798	16143	15836	15908	21368	20936	21570	21198	21199		714	404	422	416	447	437	659	666	670	668	696	1413	1360	1361	1404	1453	2094	2113	2149	2149	2129	2887	2799
715	3218	2967	3261	3319	3252	5251	5445	5120	5152	5288	10518	10567	11034	10734	10686	15926	15853	16201	15895	15976	21454	21033	21655	21272	21270		715	405	422	418	447	437	660	665	672	668	696	1414	1359	1362	1405	1453	2097	2113	2151	2153	2135	2889	2803
716	3232	2977	3269	3332	3261	5264	5467	5136	5171	5308	10552	10600	11077	10772	10716	15991	15912	16255	15949	16040	21519	21112	21728	21341	21346		716	405	423	417	447	437	660	666	673	672	696	1420	1359	1363	1407	1454	2098	2115	2154	2160	2137	2895	2803
717	3249	2988	3277	3344	3269	5279	5495	5152	5183	5322	10588	10636	11101	10812	10750	16048	15965	16318	15996	16089	21583	21187	21808	21428	21421		717	405	426	419	447	439	660	669	674	673	696	1421	1361	1366	1407	1456	2098	2118	2156	2164	2139	2894	2810
718	3256	2995	3292	3357	3285	5299	5516	5177	5202	5346	10623	10678	11142	10851	10794	16100	16019	16385	16048	16145	21676	21262	21885	21507	21501		718	406	427	419	449	439	663	671	674	674	697	1420	1361	1368	1407	1458	2097	2120	2159	2166	2142	2896	2815
719	3262	3008	3303	3373	3300	5309	5537	5196	5220	5367	10668	10708	11179	10896	10822	16166	16089	16458	16115	16198	21737	21337	21953	21598	21571		719	405	426	419	450	439	664	672	674	676	700	1421	1363	1370	1408	1460	2101	2124	2164	2171	2143	2896	2820
720	3274	3017	3317	3396	3311	5328	5556	5219	5239	5387	10710	10743	11202	10940	10866	16221	16166	16518	16191	16261	21803	21436	22020	21670	21661		720	405	426	419	450	440	664	671	676	675	703	1424	1364	1372	1409	1464	2104	2127	2165	2174	2148	2898	2821
721	3291	3024	3332	3405	3328	5350	5572	5236	5262	5412	10750	10783	11235	10972	10896	16290	16229	16561	16264	16318	21885	21502	22096	21757	21744		721	405	429	419	450	443	664	670	678	675	704	1424	1366	1372	1410	1464	2104	2131	2166	2175	2148	2900	2828
722	3299	3041	3344	3421	3346	5369	5596	5253	5287	5430	10788	10823	11287	11003	10937	16344	16299	16615	16317	16363	21971	21582	22188	21838	21826		722	405	430	419	451	443	663	670	678	675	705	1424	1367	1376	1411	1470	2103	2138	2168	2176	2149	2905	2833
723	3310	3054	3361	3449	3360	5382	5611	5271	5305	5447	10817	10868	11318	11037	10984	16405	16336	16675	16380	16419	22042	21646	22276	21924	21889		723	405	430	419	452	443	663	672	678	676	706	1428	1367	1376	1414	1473	2105	2139	2172	2179	2151	2911	2836
724	3326	3059	3367	3461	3367	5403	5631	5287	5324	5473	10863	10903	11352	11090	11035	16450	16410	16733	16438	16489	22124	21714	22347	22020	21965		724	406	431	422	452	442	668	672	682	677	710	1428	1366	1378	1416	1478	2109	2142	2177	2181	2152	2916	2837
725	3338	3068	3381	3477	3382	5416	5645	5305	5336	5495	10905	10940	11393	11132	11073	16502	16488	16804	16515	16553	22204	21778	22423	22087	22049		725	406	431	422	453	443	668	673	683	678	710	1432	1372	1377	1417	1478	2112	2144	2180	2188	2157	2921	2839
726	3348	3084	3400	3486	3394	5431	5664	5326	5355	5509	10946	10972	11449	11171	11121	16575	16536	16861	16588	16613	22287	21857	22507	22164	22118		726	407	431	424	453	443	667	673	685	680	711	1434	1372	1377	1419	1479	2117	2149	2183	2190	2159	2922	2839
727	3358	3094	3407	3506	3404	5455	5687	5338	5383	5531	10985	11008	11497	11212	11166	16637	16592	16920	16663	16675	22366	21937	22593	22258	22191		727	408	431	428	452	446	670	676	686	681	712	1436	1374	1381	1422	1481	2118	2151	2183	2191	2161	2923	2843
728	3367	3111	3416	3524	3418	5475	5702	5355	5405	5552	11030	11045	11527	11251	11213	16709	16651	16988	16720	16723	22448	22025	22653	22337	22264		728	409	432	428	451	445	669	679	686	682	718	1438	1374	1381	1422	1482	2118	2152	2185	2192	2164	2931	2849
729	3381	3122	3434	3534	3432	5495	5726	5374	5424	5577	11072	11086	11564	11299	11248	16770	16726	17060	16785	16768	22526	22122	22733	22413	22343		729	409	433	430	451	445	669	681	688	682	718	1438	1377	1382	1423	1484	2122	2161	2189	2198	2167	2934	2852
730	3390	3140	3443	3553	3451	5521	5750	5393	5438	5591	11117	11112	11603	11335	11297	16818	16783	17123	16836	16834	22614	22194	22812	22510	22419		730	410	433	431	452	445	669	681	688	684	718	1443	1379	1385	1423	1488	2125	2166	2192	2200	2169	2939	2856
731	3404	3151	3457	3580	3471	5542	5776	5404	5458	5613	11156	11159	11647	11374	11354	16883	16844	17186	16907	16879	22705	22292	22892	22583	22513		731	410	434	432	452	444	669	682	688	684	719	1445	1382	1387	1425	1491	2129	2168	2194	2205	2170	2941	2859
732	3419	3169	3462	3592	3482	5561	5793	5421	5477	5637	11200	11202	11685	11411	11392	16946	16901	17249	16958	16958	22780	22361	22983	22671	22593		732	410	434	432	452	445	672	682	689	686	719	1447	1383	1388	1427	1495	2130	2171	2198	2206	2170	2944	2865
733	3428	3179	3473	3603	3501	5576	5818	5446	5495	5668	11244	11245	11732	11442	11432	17014	16964	17317	17024	17018	22877	22442	23073	22752	22679		733	410	435	432	452	445	672	683	689	686	718	1447	1386	1396	1428	1499	2132	2174	2201	2209	2175	2947	2869
734	3434	3190	3483	3621	3508	5600	5832	5469	5517	5687	11284	11284	11768	11487	11473	17069	17022	17360	17095	17086	22973	22527	23154	22838	22755		734	411	437	433	457	446	673	685	690	686	718	1450	1387	1398	1430	1503	2137	2176	2210	2210	2180	2951	2871
735	3443	3202	3494	3632	3523	5612	5866	5493	5530	5705	11316	11335	11810	11528	11509	17136	17078	17425	17149	17154	23063	22611	23246	22921	22829		735	414	440	433	457	446	673	685	690	686	718	1454	1385	1404	1433	1504	2142	2177	2217	2212	2185	2954	2874
736	3453	3218	3510	3647	3537	5629	5888	5519	5548	5718	11350	11371	11853	11574	11560	17198	17146	17496	17202	17225	23145	22692	23328	23023	22913		736	414	441	433	458	446	673	685	690	686	719	1455	1389	1407	1435	1505	2144	2179	2219	2217	2190	2952	2878
737	3470	3234	3517	3659	3555	5648	5916	5533	5567	5744	11402	11406	11883	11620	11599	17257	17211	17550	17257	17303	23233	22767	23410	23103	22984		737	416	441	433	459	446	673	686	692	686	720	1457	1388	1408	1434	1508	2146	2181	2225	2219	2191	2954	2880
738	3485	3252	3536	3668	3570	5666	5941	5553	5585	5760	11443	11443	11922	11664	11634	17330	17290	17611	17319	17364	23325	22848	23509	23192	23061		738	416	443	432	459	447	674	687	693	686	721	1459	1389	1408	1434	1511	2146	2182	2229	2223	2191	2956	2887
739	3495	3267	3554	3686	3583	5682	5963	5562	5607	5777	11480	11484	11960	11704	11673	17391	17355	17670	17364	17428	23403	22944	23596	23269	23147		739	416	443	432	460	450	674	687	692	686	721	1461	1390	1408	1435	1516	2146	2182	2229	2224	2192	2957	2890
740	3510	3276	3564	3697	3594	5705	5982	5583	5626	5796	11534	11530	12002	11750	11714	17446	17414	17735	17420	17491	23476	23016	23698	23345	23210		740	417	443	432	460	450	673	689	693	687	721	1464	1389	1411	1438	1517	2147	2185	2229	2226	2194	2961	2892
741	3520	3290	3579	3711	3604	5728	6003	5599	5643	5813	11590	11572	12055	11786	11753	17511	17487	17789	17496	17549	23560	23091	23804	23424	23294		741	419	443	432	460	450	677	690	694	688	721	1463	1390	1411	1438	1518	2150	2190	2231	2231	2197	2967	2898
742	3527	3304	3588	3730	3622	5752	6019	5618	5654	5835	11632	11605	12104	11828	11791	17572	17545	17851	17568	17608	23648	23174	23888	23509	23369		742	422	444	433	460	450	679	691	696	691	721	1463	1392	1413	1439	1519	2154	2189	2236	2232	2202	2969	2902
743	3534	3323	3610	3741	3639	5775	6048	5630	5670	5856	11678	11650	12148	11883	11831	17631	17597	17903	17624	17685	23736	23257	23994	23578	23451		743	421	443	434	460	450	680	691	697	693	722	1465	1394	1418	1442	1524	2158	2190	2237	2234	2202	2972	2906
744	3546	3341	3624	3758	3652	5805	6071	5650	5694	5874	11717	11689	12197	11928	11887	17691	17651	17967	17693	17763	23814	23352	24067	23676	23528		744	422	443	435	460	451	683	692	697	694	725	1466	1402	1419	1443	1524	2159	2191	2241	2236	2206	2976	2908
745	3559	3349	3643	3773	3663	5829	6091	5673	5717	5891	11759	11726	12239	11978	11928	17771	17712	18035	17760	17842	23917	23443	24152	23764	23636		745	422	445	437	460	451	685	695	699	694	723	1466	1401	1419	1443	1525	2161	2190	2242	2237	2208	2982	2908
746	3574	3373	3655	3786	3674	5843	6108	5699	5741	5911	11808	11775	12294	12033	11984	17832	17769	18100	17853	17910	24026	23533	24254	23834	23716		746	423	445	437	460	452	686	695	702	695	725	1470	1403	1419	1446	1528	2162	2194	2243	2239	2211	2986	2908
747	3584	3388	3663	3796	3687	5864	6124	5719	5760	5935	11844	11820	12341	12083	12020	17898	17837	18169	17924	17978	24105	23615	24346	23921	23790		747	423	445	437	460	452	687	695	702	695	726	1471	1404	1421	1452	1532	2163	2194	2246	2241	2210	2995	2910
748	3601	3401	3669	3811	3699	5881	6145	5743	5778	5962	11898	11863	12385	12127	12054	17965	17893	18239	17998	18038	24180	23694	24424	24018	23878		748	424	446	438	462	454	687	701	702	695	725	1474	1404	1422	1454	1536	2166	2195	2247	2244	2214	2999	2912
749	3613	3415	3677	3821	3704	5901	6162	5765	5799	5984	11950	11905	12417	12164	12099	18044	17940	18311	18060	18094	24247	23777	24523	24114	23954		749	424	446	440	464	455	687	701	706	695	726	1475	1405	1422	1458	1535	2168	2197	2247	2247	2220	3010	2914
750	3630	3428	3692	3842	3718	5920	6177	5786	5823	6013	11989	11943	12481	12204	12138	18120	18002	18371	18118	18162	24355	23861	24624	24189	24036		750	424	446	440	464	455	688	701	708	696	726	1477	1409	1423	1458	1542	2171	2200	2251	2253	2221	3012	2923
751	3647	3434	3700	3845	3724	5936	6209	5807	5841	6027	12028	11987	12517	12248	12181	18197	18082	18442	18174	18236	24443	23938	24697	24277	24124		751	424	446	440	465	460	688	701	710	696	726	1479	1412	1423	1459	1543	2171	2204	2250	2254	2224	3018	2928
752	3662	3441	3711	3859	3740	5963	6233	5838	5861	6047	12068	12028	12565	12296	12219	18272	18146	18508	18241	18302	24543	24027	24801	24367	24220		752	424	446	441	465	460	688	700	710	695	726	1481	1415	1423	1460	1544	2174	2205	2251	2253	2226	3024	2932
753	3675	3447	3723	3870	3762	5990	6259	5861	5893	6071	12116	12059	12623	12337	12258	18331	18193	18571	18325	18361	24635	24108	24875	24443	24315		753	424	446	441	465	462	687	702	710	696	726	1484	1415	1423	1462	1544	2178	2206	2252	2259	2230	3026	2934
754	3690	3458	3735	3887	3777	6005	6278	5879	5924	6095	12174	12091	12655	12386	12295	18397	18255	18620	18388	18423	24716	24179	24967	24547	24402		754	424	447	441	466	462	687	703	712	697	726	1486	1417	1424	1463	1544	2177	2214	2251	2261	2232	3028	2932
755	3709	3468	3745	3894	3787	6029	6295	5902	5948	6117	12235	12134	12704	12433	12337	18474	18337	18696	18456	18509	24805	24271	25054	24653	24510		755	425	447	442	466	463	687	703	714	697	727	1488	1420	1425	1462	1544	2185	2217	2255	2266	2236	3032	2939
756	3724	3481	3764	3908	3806	6049	6314	5917	5975	6138	12285	12179	12758	12475	12388	18523	18404	18752	18506	18568	24884	24361	25148	24721	24609		756	426	448	442	466	465	687	704	717	700	727	1487	1423	1425	1463	1545	2186	2220	2262	2267	2237	3036	2941
757	3738	3493	3781	3921	3812	6086	6331	5947	5994	6161	12325	12220	12803	12512	12427	18589	18465	18819	18568	18645	24987	24454	25227	24822	24696		757	426	448	444	467	468	689	704	717	701	728	1492	1424	1430	1465	1547	2188	2226	2266	2274	2239	3039	2942
758	3756	3506	3797	3930	3825	6108	6360	5969	6024	6193	12365	12258	12860	12558	12455	18646	18535	18878	18628	18720	25086	24574	25320	24904	24802		758	426	448	444	468	468	690	705	717	701	729	1494	1424	1433	1467	1547	2188	2227	2266	2277	2241	3041	2947
759	3762	3519	3807	3942	3845	6130	6381	5992	6036	6214	12420	12306	12912	12601	12510	18710	18602	18940	18698	18777	25170	24659	25392	24976	24887		759	426	448	444	468	468	691	706	717	702	730	1494	1430	1434	1467	1550	2188	2230	2271	2281	2244	3044	2951
760	3774	3538	3815	3968	3854	6159	6407	6012	6056	6239	12480	12346	12964	12642	12556	18806	18672	19022	18764	18849	25262	24744	25488	25078	24977		760	428	448	444	468	469	692	706	718	703	732	1497	1435	1434	1467	1553	2194	2233	2275	2287	2246	3045	2949
761	3788	3549	3837	3988	3867	6184	6429	6042	6073	6253	12515	12394	13006	12691	12601	18871	18736	19099	18837	18909	25354	24842	25578	25199	25061		761	427	451	445	468	469	694	706	718	704	733	1498	1437	1436	1471	1556	2196	2235	2281	2289	2249	3049	2956
762	3805	3559	3853	4010	3880	6200	6454	6057	6088	6276	12558	12445	13053	12735	12640	18951	18820	19163	18908	18979	25454	24929	25659	25280	25149		762	427	451	446	469	469	695	706	719	704	733	1498	1438	1437	1474	1557	2200	2238	2285	2291	2249	3052	2959
763	3819	3582	3865	4028	3888	6222	6471	6077	6103	6300	12596	12483	13106	12787	12665	19017	18883	19225	18975	19057	25542	25019	25775	25373	25248		763	427	451	447	472	469	695	708	721	704	736	1500	1440	1437	1476	1558	2203	2239	2289	2293	2249	3058	2961
764	3831	3593	3884	4046	3898	6250	6497	6089	6117	6323	12643	12528	13169	12831	12706	19094	18956	19305	19053	19110	25651	25108	25881	25451	25357		764	427	451	448	472	469	696	708	724	704	737	1503	1441	1440	1476	1558	2207	2242	2290	2296	2252	3063	2963
765	3839	3608	3893	4065	3917	6276	6520	6112	6147	6340	12683	12578	13211	12884	12745	19157	19029	19369	19132	19176	25753	25200	25983	25543	25441		765	427	453	449	472	469	697	708	724	706	739	1504	1446	1444	1477	1559	2207	2247	2295	2300	2255	3066	2969
766	3850	3621	3905	4076	3930	6290	6548	6130	6177	6361	12740	12619	13262	12936	12780	19224	19103	19429	19196	19229	25839	25271	26075	25630	25530		766	427	453	449	472	470	697	710	726	707	739	1505	1446	1443	1480	1561	2210	2249	2294	2302	2258	3069	2975
767	3861	3641	3919	4087	3951	6309	6571	6144	6198	6381	12791	12672	13304	12988	12816	19303	19192	19504	19265	19298	25935	25363	26157	25704	25637		767	427	454	451	472	470	698	710	726	709	740	1504	1445	1445	1482	1565	2216	2254	2300	2304	2258	3074	2989
768	3874	3649	3926	4100	3962	6323	6594	6170	6220	6402	12839	12722	13344	13023	12863	19375	19264	19570	19357	19370	26017	25432	26249	25785	25726		768	427	455	451	473	472	698	712	727	710	746	1506	1447	1446	1483	1569	2220	2258	2302	2309	2264	3075	2990
769	3888	3665	3944	4112	3973	6351	6619	6198	6249	6424	12890	12767	13384	13064	12902	19450	19337	19626	19428	19440	26109	25520	26347	25871	25829		769	428	455	452	474	475	697	712	727	710	746	1507	1447	1446	1483	1573	2224	2264	2304	2312	2268	3078	2994
770	3905	3690	3967	4119	3985	6380	6656	6231	6285	6452	12931	12822	13429	13112	12959	19513	19404	19702	19511	19513	26199	25611	26455	25960	25935		770	431	458	453	474	476	699	712	727	712	748	1508	1450	1447	1486	1575	2226	2265	2309	2316	2269	3081	3001
771	3919	3709	3980	4130	4001	6404	6679	6246	6307	6473	12966	12860	13486	13161	13006	19588	19477	19773	19574	19582	26284	25707	26560	26039	26035		771	432	459	453	475	476	699	715	728	714	749	1509	1450	1452	1490	1576	2229	2267	2314	2318	2272	3084	3004
772	3931	3715	3994	4149	4013	6421	6702	6266	6325	6494	13003	12901	13532	13210	13050	19670	19562	19852	19647	19647	26387	25794	26653	26152	26127		772	434	460	453	475	476	699	715	732	714	750	1512	1452	1456	1492	1576	2231	2269	2319	2323	2273	3089	3005
773	3944	3732	4018	4166	4032	6446	6726	6284	6353	6518	13054	12938	13583	13269	13097	19746	19636	19920	19705	19720	26494	25892	26750	26252	26216		773	434	461	453	475	477	699	716	731	716	751	1515	1452	1455	1494	1584	2238	2272	2321	2327	2273	3094	3010
774	3956	3747	4031	4182	4050	6461	6750	6312	6373	6541	13098	12989	13638	13324	13142	19812	19713	19991	19758	19794	26579	25991	26860	26374	26306		774	435	464	456	479	477	701	716	731	718	752	1517	1453	1456	1494	1585	2241	2273	2320	2329	2277	3096	3014
775	3976	3766	4048	4202	4061	6486	6776	6334	6397	6559	13141	13039	13685	13376	13182	19893	19794	20065	19839	19867	26678	26076	26947	26483	26402		775	437	464	456	481	479	702	720	734	718	753	1519	1454	1462	1496	1586	2241	2272	2322	2329	2282	3101	3017
776	3992	3778	4070	4216	4074	6513	6795	6361	6424	6592	13185	13081	13738	13432	13231	19962	19864	20142	19922	19936	26773	26162	27051	26575	26496		776	437	464	456	481	479	702	721	734	719	753	1523	1455	1464	1497	1590	2247	2273	2325	2335	2282	3105	3020
777	4003	3791	4088	4235	4088	6532	6818	6389	6448	6619	13231	13135	13786	13506	13268	20050	19928	20208	19995	20010	26873	26251	27147	26665	26594		777	437	464	456	482	480	703	723	737	719	754	1524	1455	1467	1498	1596	2252	2275	2331	2338	2285	3108	3021
778	4020	3799	4102	4249	4103	6562	6836	6414	6468	6647	13282	13190	13826	13559	13309	20121	19970	20280	20055	20094	26966	26362	27241	26754	26686		778	437	464	455	482	480	703	729	740	720	754	1525	1455	1471	1499	1600	2255	2277	2336	2339	2287	3116	3024
779	4030	3816	4119	4260	4121	6588	6855	6433	6488	6680	13334	13237	13882	13600	13345	20214	20048	20348	20131	20178	27052	26466	27360	26842	26777		779	440	465	457	482	481	705	731	743	720	754	1526	1457	1474	1500	1600	2255	2285	2336	2340	2286	3122	3030
780	4043	3830	4137	4276	4132	6617	6882	6450	6510	6699	13394	13271	13932	13649	13386	20292	20113	20405	20203	20256	27137	26561	27481	26941	26895		780	442	465	457	482	481	705	731	744	720	757	1530	1459	1475	1500	1605	2261	2288	2337	2342	2290	3124	3036
781	4058	3841	4154	4290	4149	6637	6912	6473	6534	6723	13443	13322	13983	13694	13437	20372	20200	20496	20276	20351	27242	26657	27576	27060	26996		781	442	466	457	482	481	708	733	747	722	757	1533	1459	1475	1500	1607	2263	2290	2341	2345	2294	3126	3046
782	4070	3850	4175	4313	4164	6661	6931	6498	6564	6746	13482	13369	14036	13751	13480	20454	20275	20577	20351	20423	27349	26758	27674	27143	27102		782	442	467	458	482	480	711	733	751	722	757	1532	1460	1475	1500	1611	2265	2292	2345	2346	2300	3128	3049
783	4080	3871	4185	4324	4175	6683	6957	6520	6589	6766	13539	13418	14092	13809	13524	20533	20357	20648	20430	20507	27458	26864	27782	27249	27200		783	442	474	457	483	480	712	732	751	723	757	1532	1462	1476	1501	1613	2268	2291	2348	2348	2307	3131	3056
784	4093	3886	4201	4346	4193	6710	6983	6550	6616	6796	13584	13463	14130	13868	13565	20607	20443	20725	20501	20580	27572	26972	27880	27347	27298		784	442	474	457	484	479	712	731	751	725	757	1536	1464	1478	1503	1614	2271	2294	2350	2354	2313	3134	3061
785	4108	3894	4219	4356	4207	6737	7007	6572	6635	6822	13640	13515	14186	13926	13605	20690	20519	20814	20569	20651	27680	27062	27984	27452	27402		785	445	474	459	484	479	712	732	751	725	757	1536	1467	1479	1503	1615	2279	2294	2352	2356	2319	3138	3065
786	4126	3908	4232	4379	4220	6754	7024	6596	6659	6839	13698	13560	14255	13968	13659	20777	20598	20899	20652	20721	27781	27146	28080	27541	27501		786	446	474	460	484	482	714	732	751	728	760	1540	1467	1483	1508	1616	2282	2297	2352	2356	2322	3142	3070
787	4139	3919	4246	4391	4234	6783	7042	6616	6685	6852	13752	13617	14300	14021	13719	20856	20673	20967	20725	20806	27891	27235	28180	27636	27587		787	446	475	460	484	482	716	735	753	728	761	1541	1468	1487	1511	1620	2283	2299	2354	2356	2322	3147	3074
788	4153	3939	4267	4411	4255	6808	7066	6655	6704	6878	13802	13676	14355	14067	13778	20934	20754	21054	20795	20886	28006	27343	28280	27745	27678		788	446	476	460	484	483	717	736	753	728	761	1541	1468	1489	1512	1621	2285	2303	2358	2363	2325	3151	3076
789	4166	3953	4284	4434	4268	6833	7098	6674	6729	6911	13856	13719	14396	14129	13830	21020	20812	21133	20874	20959	28119	27444	28371	27845	27777		789	448	476	461	484	485	718	736	753	728	761	1543	1469	1492	1514	1624	2288	2309	2366	2362	2328	3151	3078
790	4182	3964	4297	4449	4287	6863	7116	6705	6756	6942	13923	13764	14446	14183	13878	21103	20886	21216	20929	21032	28225	27569	28464	27953	27869		790	448	476	462	484	486	718	736	754	729	764	1545	1472	1492	1514	1628	2294	2314	2367	2363	2331	3157	3085
791	4194	3980	4312	4467	4296	6893	7140	6729	6785	6963	13981	13818	14513	14236	13939	21167	20958	21303	20999	21118	28327	27686	28563	28062	27996		791	450	478	464	485	488	718	737	755	730	765	1546	1474	1493	1514	1629	2297	2314	2370	2364	2334	3159	3085
792	4206	3994	4331	4483	4315	6917	7170	6761	6800	6992	14042	13860	14568	14291	14001	21249	21038	21383	21082	21197	28412	27789	28662	28169	28105		792	450	479	467	485	488	719	737	756	730	766	1550	1477	1494	1515	1632	2302	2319	2370	2369	2333	3165	3087
793	4224	4007	4351	4503	4334	6935	7199	6777	6822	7020	14097	13915	14630	14330	14049	21311	21118	21462	21141	21273	28514	27891	28771	28262	28209		793	451	480	467	485	488	723	738	756	732	768	1554	1478	1494	1520	1633	2306	2319	2375	2368	2335	3168	3088
794	4242	4019	4368	4517	4354	6962	7228	6803	6845	7046	14150	13972	14680	14380	14112	21384	21191	21540	21225	21339	28616	28006	28873	28364	28300		794	451	480	466	487	488	726	738	758	732	769	1555	1479	1497	1523	1637	2307	2321	2377	2371	2338	3170	3090
795	4258	4036	4382	4523	4371	6991	7257	6823	6875	7074	14209	14017	14723	14429	14165	21471	21270	21619	21293	21406	28711	28105	28991	28471	28397		795	451	480	466	487	488	727	739	758	732	770	1556	1479	1501	1523	1637	2308	2327	2377	2377	2340	3173	3092
796	4272	4052	4394	4542	4379	7014	7289	6845	6900	7093	14261	14061	14785	14482	14225	21540	21350	21700	21348	21483	28833	28217	29090	28561	28506		796	451	481	466	487	489	727	739	760	732	772	1556	1479	1506	1526	1637	2312	2331	2381	2378	2346	3179	3094
797	4285	4068	4415	4563	4397	7050	7307	6870	6942	7122	14315	14116	14843	14538	14275	21615	21434	21789	21434	21564	28942	28311	29186	28679	28603		797	452	481	468	489	490	727	739	760	732	772	1558	1479	1509	1526	1642	2317	2331	2388	2383	2352	3189	3096
798	4293	4081	4430	4585	4410	7076	7337	6894	6962	7151	14365	14171	14901	14596	14341	21710	21535	21869	21508	21654	29056	28430	29305	28794	28719		798	453	481	468	491	492	727	741	760	732	772	1559	1485	1512	1526	1645	2319	2333	2391	2388	2355	3191	3102
799	4305	4098	4444	4592	4426	7101	7369	6928	6986	7181	14413	14227	14952	14650	14394	21800	21622	21959	21585	21740	29159	28535	29420	28895	28829		799	453	483	468	491	492	728	742	762	731	773	1561	1485	1513	1527	1647	2322	2336	2394	2398	2359	3194	3105
800	4318	4115	4456	4610	4444	7124	7403	6953	7024	7202	14457	14272	15008	14711	14438	21874	21704	22022	21669	21817	29281	28645	29512	29020	28957		800	453	483	470	492	492	729	742	764	731	773	1564	1485	1516	1530	1647	2326	2342	2400	2403	2360	3197	3109
801	4332	4121	4475	4631	4461	7156	7434	6979	7049	7225	14511	14329	15073	14765	14514	21954	21782	22096	21744	21897	29388	28733	29621	29125	29067		801	453	483	470	492	494	730	743	768	734	774	1569	1486	1518	1536	1653	2330	2346	2404	2408	2360	3201	3111
802	4352	4133	4487	4642	4483	7184	7452	7005	7080	7261	14551	14371	15139	14824	14566	22014	21845	22186	21834	21976	29497	28854	29723	29233	29187		802	453	483	472	492	495	731	742	769	736	774	1573	1488	1520	1540	1655	2333	2348	2407	2415	2361	3203	3113
803	4368	4152	4501	4664	4513	7216	7478	7028	7104	7284	14599	14418	15219	14874	14629	22090	21932	22270	21916	22046	29605	28952	29823	29345	29307		803	454	483	472	492	497	732	742	771	736	773	1577	1489	1520	1541	1657	2336	2351	2412	2415	2365	3204	3118
804	4383	4164	4518	4681	4525	7242	7505	7064	7139	7310	14655	14479	15284	14938	14671	22176	22017	22340	21995	22122	29726	29049	29953	29447	29434		804	456	483	474	493	497	735	742	775	736	772	1583	1491	1519	1542	1660	2337	2351	2415	2420	2367	3205	3123
805	4410	4178	4530	4690	4538	7263	7544	7079	7181	7334	14710	14523	15344	14987	14728	22251	22094	22407	22074	22185	29833	29150	30071	29556	29522		805	456	483	476	494	497	736	742	776	736	773	1584	1495	1520	1542	1662	2340	2358	2417	2420	2367	3208	3124
806	4427	4193	4542	4711	4549	7285	7568	7107	7205	7363	14764	14580	15403	15033	14781	22321	22168	22501	22158	22249	29953	29274	30175	29679	29621		806	457	483	476	494	498	736	743	776	740	774	1584	1494	1523	1544	1662	2342	2363	2423	2421	2369	3208	3132
807	4438	4203	4559	4723	4560	7297	7593	7128	7235	7383	14835	14643	15450	15081	14842	22397	22246	22602	22242	22325	30057	29386	30291	29770	29722		807	458	483	476	494	499	737	743	777	739	774	1583	1498	1527	1544	1666	2343	2363	2424	2425	2373	3211	3132
808	4453	4220	4574	4740	4585	7317	7629	7157	7253	7413	14886	14698	15521	15140	14898	22481	22327	22684	22322	22416	30171	29490	30408	29876	29828		808	458	485	477	495	499	739	743	777	739	775	1584	1498	1528	1545	1668	2344	2368	2430	2424	2375	3214	3138
809	4473	4238	4587	4761	4600	7339	7656	7179	7282	7438	14940	14762	15580	15181	14942	22563	22410	22759	22400	22515	30287	29596	30523	29996	29949		809	458	486	477	496	499	741	745	778	739	775	1585	1502	1532	1548	1669	2343	2372	2431	2428	2377	3215	3139
810	4488	4260	4605	4776	4617	7357	7682	7203	7299	7468	14991	14815	15617	15243	15003	22647	22499	22856	22481	22597	30417	29716	30623	30125	30052		810	458	486	477	496	499	741	746	781	741	778	1587	1503	1533	1551	1672	2345	2376	2435	2429	2381	3223	3143
811	4500	4273	4620	4790	4630	7392	7713	7228	7320	7501	15047	14868	15664	15307	15048	22733	22566	22945	22562	22697	30533	29823	30723	30248	30181		811	460	487	480	496	502	741	748	781	741	779	1592	1507	1536	1550	1673	2352	2379	2440	2432	2382	3227	3152
812	4515	4285	4636	4803	4640	7415	7747	7258	7347	7522	15104	14915	15721	15360	15105	22821	22629	23029	22667	22788	30674	29943	30845	30360	30287		812	459	487	480	497	505	743	748	782	741	780	1592	1507	1539	1550	1673	2356	2380	2448	2435	2384	3228	3153
813	4541	4306	4654	4809	4662	7444	7779	7283	7386	7553	15145	14979	15792	15426	15149	22908	22722	23122	22737	22876	30801	30049	30963	30490	30425		813	459	487	481	496	507	743	748	786	742	783	1593	1509	1540	1554	1673	2360	2384	2453	2438	2385	3235	3160
814	4556	4312	4670	4825	4675	7476	7802	7318	7415	7579	15201	15030	15849	15482	15195	22991	22803	23198	22800	22955	30919	30157	31082	30595	30535		814	461	487	482	497	509	744	749	787	743	782	1595	1512	1540	1554	1676	2360	2385	2455	2439	2389	3241	3163
815	4572	4325	4694	4845	4698	7503	7824	7342	7444	7610	15240	15092	15899	15549	15250	23087	22880	23286	22880	23047	31035	30274	31193	30688	30647		815	461	487	483	497	511	744	750	789	743	784	1599	1514	1545	1558	1681	2362	2390	2456	2443	2391	3245	3166
816	4589	4346	4712	4863	4716	7527	7852	7376	7473	7649	15286	15160	15960	15612	15298	23175	22970	23374	22952	23125	31151	30380	31325	30795	30749		816	461	488	484	497	514	747	753	791	742	784	1602	1517	1546	1562	1680	2365	2393	2462	2444	2393	3248	3171
817	4608	4364	4725	4882	4731	7553	7877	7408	7499	7687	15346	15220	16024	15664	15348	23269	23059	23458	23054	23218	31257	30487	31432	30923	30861		817	460	490	484	497	515	749	753	792	743	786	1603	1516	1550	1562	1681	2367	2396	2463	2445	2398	3248	3175
818	4622	4376	4743	4895	4744	7572	7915	7438	7526	7712	15389	15283	16067	15717	15404	23365	23152	23560	23143	23303	31366	30584	31526	31040	30991		818	460	494	484	499	515	749	753	792	743	787	1605	1519	1551	1563	1681	2368	2399	2468	2448	2403	3255	3183
819	4640	4390	4762	4913	4761	7611	7946	7467	7546	7748	15453	15343	16125	15791	15472	23454	23231	23631	23223	23390	31491	30698	31637	31135	31111		819	460	495	484	499	515	749	754	793	744	787	1604	1522	1552	1566	1681	2371	2407	2467	2452	2408	3262	3187
820	4655	4406	4779	4925	4772	7631	7985	7496	7575	7775	15508	15395	16197	15847	15522	23536	23328	23704	23301	23488	31591	30819	31741	31263	31219		820	461	496	484	500	516	751	755	794	743	788	1605	1530	1557	1567	1684	2371	2409	2470	2450	2410	3264	3192
821	4665	4424	4806	4942	4787	7655	8013	7518	7609	7807	15546	15466	16264	15905	15566	23622	23415	23801	23388	23568	31713	30944	31875	31389	31351		821	462	496	484	499	515	752	755	794	743	791	1609	1531	1558	1571	1684	2372	2410	2474	2452	2410	3265	3196
822	4679	4439	4820	4959	4808	7686	8038	7552	7636	7836	15595	15546	16325	15965	15625	23699	23502	23888	23479	23664	31831	31057	31980	31492	31482		822	462	497	484	500	516	756	758	797	744	791	1616	1534	1565	1577	1686	2378	2416	2489	2454	2412	3271	3207
823	4696	4453	4828	4980	4830	7708	8069	7579	7660	7864	15656	15596	16388	16018	15678	23783	23592	23966	23559	23750	31966	31171	32093	31605	31603		823	462	497	484	500	516	756	758	797	746	791	1618	1534	1567	1579	1688	2378	2423	2495	2456	2416	3271	3208
824	4722	4476	4842	4995	4843	7735	8096	7604	7683	7897	15701	15663	16435	16083	15741	23868	23687	24059	23663	23842	32085	31285	32215	31713	31722		824	464	498	485	501	516	757	758	797	749	792	1618	1535	1570	1582	1688	2383	2429	2499	2458	2422	3276	3214
825	4730	4489	4862	5008	4854	7764	8127	7631	7707	7921	15760	15706	16474	16145	15800	23955	23785	24144	23742	23929	32212	31404	32315	31828	31846		825	463	500	485	502	518	758	759	801	750	794	1622	1541	1574	1588	1697	2387	2430	2499	2460	2424	3283	3221
826	4757	4501	4879	5017	4869	7792	8161	7667	7725	7945	15812	15768	16537	16189	15852	24059	23868	24217	23840	24031	32348	31520	32430	31951	31955		826	466	500	486	507	518	759	760	802	750	797	1625	1546	1578	1588	1700	2391	2431	2499	2464	2426	3292	3228
827	4779	4517	4901	5030	4890	7817	8194	7696	7752	7969	15866	15830	16595	16241	15905	24132	23943	24320	23930	24124	32474	31656	32555	32070	32071		827	466	500	488	509	518	759	760	801	750	798	1628	1546	1579	1592	1700	2395	2440	2499	2466	2431	3293	3226
828	4799	4531	4917	5052	4911	7853	8209	7724	7773	7990	15918	15878	16680	16306	15978	24224	24024	24404	23999	24216	32588	31770	32693	32184	32171		828	467	501	488	509	519	760	761	801	751	799	1631	1546	1582	1595	1704	2402	2441	2506	2474	2438	3300	3232
829	4816	4549	4935	5070	4932	7887	8241	7759	7802	8017	15968	15938	16743	16363	16045	24307	24094	24512	24088	24298	32719	31877	32826	32289	32288		829	468	501	488	511	520	760	762	802	756	801	1632	1547	1581	1600	1705	2404	2446	2510	2476	2444	3306	3238
830	4836	4560	4951	5099	4957	7915	8273	7789	7833	8047	16028	15998	16809	16417	16109	24397	24182	24599	24171	24398	32845	32016	32952	32407	32397		830	468	503	488	511	520	761	763	802	757	802	1638	1550	1583	1600	1707	2405	2450	2519	2483	2447	3305	3248
831	4854	4573	4970	5118	4975	7939	8309	7810	7879	8079	16074	16043	16879	16469	16163	24508	24249	24687	24273	24504	32966	32127	33074	32524	32513		831	470	503	488	511	520	761	763	802	758	802	1640	1550	1585	1603	1707	2407	2454	2519	2491	2454	3311	3253
832	4865	4590	4990	5141	4993	7973	8341	7854	7903	8110	16136	16107	16945	16518	16224	24589	24348	24785	24352	24604	33077	32241	33194	32639	32646		832	472	504	490	511	522	762	765	802	759	802	1645	1550	1587	1606	1709	2407	2458	2524	2491	2457	3322	3259
833	4891	4601	5000	5156	5016	8000	8378	7880	7932	8141	16178	16168	17008	16580	16286	24677	24435	24869	24436	24706	33196	32383	33303	32751	32777		833	472	504	489	512	522	762	765	803	761	803	1647	1551	1586	1608	1713	2413	2460	2526	2491	2459	3322	3260
834	4911	4612	5020	5174	5036	8019	8402	7896	7967	8161	16230	16246	17075	16638	16358	24773	24529	24972	24523	24796	33324	32502	33424	32867	32903		834	473	506	489	512	524	763	765	804	760	804	1647	1552	1587	1610	1715	2415	2460	2530	2492	2460	3323	3263
835	4925	4625	5038	5191	5054	8060	8440	7923	7998	8196	16296	16300	17125	16691	16433	24855	24623	25053	24611	24891	33448	32630	33555	32975	33021		835	473	506	490	515	524	763	764	807	760	805	1648	1556	1589	1609	1720	2418	2460	2533	2494	2463	3331	3269
836	4936	4649	5065	5214	5062	8094	8484	7944	8022	8229	16360	16358	17181	16743	16490	24958	24718	25136	24714	24960	33584	32749	33680	33073	33119		836	473	507	490	515	525	765	764	807	760	808	1651	1562	1591	1612	1725	2423	2467	2537	2498	2466	3335	3271
837	4965	4660	5081	5241	5076	8128	8505	7969	8052	8259	16434	16432	17230	16810	16549	25050	24821	25229	24806	25047	33682	32862	33803	33181	33253		837	474	509	490	515	525	765	764	809	760	808	1650	1564	1594	1611	1728	2427	2469	2545	2502	2468	3336	3276
838	4983	4689	5104	5255	5094	8161	8535	8006	8086	8297	16494	16509	17304	16863	16613	25154	24924	25341	24910	25130	33818	32985	33941	33311	33382		838	475	511	491	515	527	765	765	811	762	812	1654	1566	1597	1614	1734	2429	2474	2546	2502	2468	3341	3283
839	5003	4703	5117	5278	5107	8187	8572	8039	8107	8325	16561	16563	17372	16918	16677	25240	25022	25445	24996	25226	33899	33094	34081	33439	33505		839	475	511	492	515	527	765	766	814	764	812	1658	1566	1600	1617	1737	2430	2479	2547	2505	2470	3348	3283
840	5017	4716	5139	5292	5129	8219	8590	8068	8131	8351	16621	16623	17429	16982	16742	25324	25104	25549	25082	25322	34026	33211	34212	33573	33640		840	476	513	495	515	527	765	766	814	764	812	1660	1567	1603	1617	1741	2430	2483	2549	2507	2472	3352	3283
841	5038	4739	5163	5317	5139	8253	8620	8090	8160	8387	16686	16677	17491	17059	16813	25416	25208	25654	25158	25418	34152	33328	34333	33695	33774		841	476	513	495	515	527	768	768	816	764	813	1662	1568	1606	1620	1744	2433	2486	2551	2510	2473	3355	3285
842	5056	4749	5176	5335	5165	8280	8647	8128	8196	8414	16748	16748	17568	17129	16876	25506	25304	25752	25274	25496	34303	33452	34473	33795	33895		842	476	513	495	515	527	769	768	816	764	814	1671	1569	1606	1623	1745	2438	2486	2555	2511	2476	3356	3287
843	5065	4766	5199	5351	5180	8314	8678	8156	8216	8448	16806	16809	17639	17186	16940	25616	25415	25853	25357	25596	34434	33576	34593	33906	34033		843	476	513	497	515	527	769	769	817	764	814	1673	1572	1607	1629	1749	2444	2485	2560	2515	2481	3359	3292
844	5077	4787	5219	5376	5198	8348	8707	8187	8248	8490	16869	16886	17698	17247	17015	25710	25513	25953	25429	25683	34570	33711	34710	34021	34172		844	476	514	497	516	527	770	769	818	764	816	1674	1578	1609	1631	1750	2447	2494	2562	2517	2484	3364	3302
845	5096	4803	5233	5393	5224	8385	8734	8219	8275	8524	16928	16970	17758	17320	17068	25794	25613	26052	25515	25783	34688	33836	34856	34169	34291		845	476	514	498	519	526	770	769	819	764	821	1676	1581	1615	1635	1752	2451	2496	2572	2521	2492	3367	3304
846	5124	4822	5251	5414	5247	8428	8773	8254	8308	8549	17005	17026	17816	17379	17147	25875	25701	26160	25603	25894	34808	33956	34979	34266	34406		846	478	514	498	520	531	771	771	820	767	821	1680	1585	1616	1637	1756	2456	2500	2579	2523	2495	3370	3310
847	5139	4838	5266	5437	5260	8453	8800	8290	8334	8581	17067	17067	17869	17442	17216	25987	25789	26271	25708	25987	34932	34099	35095	34411	34524		847	478	515	498	521	531	772	771	821	767	822	1682	1584	1619	1638	1759	2458	2505	2580	2526	2497	3375	3318
848	5160	4857	5293	5459	5284	8478	8823	8314	8366	8615	17139	17126	17936	17501	17280	26077	25889	26357	25806	26093	35052	34215	35218	34526	34642		848	478	515	498	521	531	773	774	825	768	823	1685	1587	1622	1638	1761	2471	2506	2584	2530	2500	3375	3322
849	5174	4882	5306	5476	5307	8506	8853	8352	8403	8651	17208	17180	18010	17567	17349	26164	25988	26459	25896	26178	35192	34350	35362	34655	34771		849	478	515	498	521	531	773	775	828	771	823	1688	1589	1624	1638	1763	2475	2507	2584	2532	2506	3381	3324
850	5189	4902	5323	5489	5332	8540	8884	8382	8431	8676	17261	17251	18070	17623	17414	26244	26099	26560	25996	26274	35334	34477	35496	34785	34907		850	480	515	498	521	531	776	775	828	771	827	1691	1590	1628	1642	1766	2475	2510	2584	2538	2508	3392	3328
851	5202	4916	5358	5508	5354	8562	8913	8415	8466	8717	17321	17315	18143	17695	17473	26327	26181	26669	26102	26363	35458	34623	35621	34908	35039		851	481	515	502	522	533	776	776	828	773	827	1698	1594	1628	1644	1774	2480	2518	2588	2540	2513	3395	3337
852	5225	4935	5383	5528	5378	8592	8942	8450	8500	8759	17387	17377	18213	17763	17543	26432	26279	26775	26188	26455	35561	34778	35747	35038	35164		852	481	516	504	524	534	776	776	830	773	827	1703	1594	1628	1645	1773	2481	2524	2591	2542	2518	3398	3344
853	5244	4944	5395	5548	5399	8628	8971	8477	8530	8803	17461	17436	18281	17823	17601	26529	26379	26862	26264	26545	35697	34915	35890	35158	35276		853	481	517	505	525	535	777	781	831	773	828	1707	1596	1631	1650	1772	2483	2529	2595	2542	2518	3403	3345
854	5267	4958	5416	5575	5419	8662	9017	8529	8574	8837	17524	17503	18341	17879	17663	26614	26490	26957	26362	26641	35812	35039	36002	35278	35410		854	481	517	505	526	536	778	785	831	773	828	1707	1603	1632	1654	1773	2485	2531	2596	2550	2519	3406	3348
855	5285	4974	5439	5600	5454	8693	9044	8560	8607	8870	17584	17561	18418	17944	17725	26704	26585	27041	26468	26735	35927	35202	36135	35411	35521		855	483	517	506	528	536	779	788	833	774	829	1711	1603	1633	1655	1776	2489	2533	2597	2550	2526	3406	3350
856	5310	4994	5455	5615	5473	8735	9083	8586	8635	8893	17657	17627	18486	18018	17792	26811	26685	27136	26581	26839	36073	35325	36266	35532	35652		856	483	519	507	528	535	781	791	835	774	832	1712	1602	1638	1658	1777	2488	2533	2599	2553	2529	3414	3351
857	5327	5010	5477	5643	5489	8774	9124	8619	8661	8929	17728	17688	18554	18071	17867	26919	26783	27247	26664	26930	36207	35440	36407	35669	35775		857	483	519	507	529	535	783	795	836	773	834	1711	1607	1645	1658	1777	2495	2540	2605	2557	2534	3426	3359
858	5348	5027	5506	5666	5513	8802	9160	8650	8692	8952	17784	17754	18624	18144	17946	27015	26891	27351	26752	27034	36342	35579	36521	35827	35919		858	484	519	507	529	535	783	795	837	774	835	1713	1610	1649	1659	1779	2498	2543	2607	2558	2537	3434	3365
859	5364	5050	5524	5686	5531	8840	9202	8684	8733	8979	17851	17821	18691	18225	18010	27147	27000	27454	26852	27108	36468	35713	36654	35977	36041		859	487	520	507	530	537	784	795	836	776	835	1715	1613	1651	1659	1784	2499	2551	2614	2572	2546	3435	3368
860	5378	5074	5541	5711	5554	8875	9243	8710	8770	9015	17914	17879	18755	18308	18070	27252	27097	27544	26940	27231	36600	35845	36796	36110	36194		860	488	520	507	532	538	784	796	839	779	837	1715	1612	1654	1662	1785	2503	2555	2616	2580	2553	3442	3373
861	5399	5092	5556	5740	5567	8900	9267	8742	8794	9055	17981	17938	18835	18373	18114	27350	27207	27636	27042	27337	36750	35962	36940	36247	36315		861	489	521	508	532	538	785	796	845	783	837	1719	1618	1654	1664	1788	2507	2561	2625	2582	2558	3454	3375
862	5423	5108	5577	5756	5588	8936	9302	8777	8815	9089	18057	18016	18905	18432	18188	27446	27314	27729	27146	27449	36884	36085	37094	36389	36466		862	489	521	508	532	538	785	796	845	782	839	1720	1618	1657	1664	1790	2510	2566	2625	2586	2563	3462	3381
863	5454	5128	5601	5777	5615	8963	9340	8813	8850	9120	18124	18079	18957	18503	18279	27559	27416	27814	27262	27556	37024	36210	37224	36517	36615		863	490	522	508	534	540	786	798	846	782	839	1727	1621	1659	1668	1794	2512	2566	2628	2586	2566	3468	3386
864	5475	5145	5622	5796	5645	8991	9376	8840	8882	9143	18189	18154	19025	18565	18350	27666	27515	27934	27366	27642	37157	36368	37355	36661	36802		864	492	522	509	534	540	786	801	848	784	840	1727	1622	1658	1671	1794	2516	2565	2633	2588	2571	3477	3398
865	5502	5163	5642	5816	5669	9028	9407	8871	8917	9172	18246	18217	19083	18630	18398	27783	27604	28054	27473	27739	37305	36505	37501	36796	36926		865	492	523	509	533	542	786	802	848	786	842	1731	1626	1658	1673	1797	2517	2569	2637	2592	2575	3487	3407
866	5525	5178	5663	5841	5696	9068	9436	8906	8957	9200	18313	18300	19141	18695	18462	27858	27703	28161	27580	27833	37423	36641	37653	36920	37047		866	492	523	516	535	542	785	804	849	787	843	1732	1626	1659	1675	1801	2517	2570	2638	2594	2581	3491	3407
867	5555	5200	5679	5862	5719	9102	9472	8950	8999	9228	18384	18379	19221	18765	18541	27970	27779	28268	27688	27938	37555	36798	37791	37074	37189		867	492	524	516	538	544	785	805	850	788	845	1734	1628	1661	1676	1806	2519	2572	2639	2594	2587	3495	3410
868	5580	5220	5703	5884	5747	9135	9512	8983	9025	9258	18448	18462	19314	18849	18625	28072	27878	28381	27802	28054	37685	36925	37920	37188	37319		868	492	524	516	541	545	785	805	850	789	846	1736	1631	1661	1677	1808	2523	2581	2650	2596	2590	3499	3417
869	5608	5239	5722	5911	5775	9179	9548	9021	9058	9305	18517	18525	19385	18913	18700	28188	27996	28484	27912	28153	37826	37058	38075	37318	37443		869	494	525	516	542	544	786	806	850	790	848	1739	1633	1668	1680	1817	2528	2586	2661	2597	2591	3505	3423
870	5633	5258	5748	5926	5799	9218	9583	9062	9085	9337	18583	18603	19456	18993	18765	28286	28084	28613	28036	28250	37955	37195	38199	37459	37589		870	494	526	518	544	545	786	807	851	791	848	1742	1636	1671	1681	1817	2531	2585	2661	2600	2593	3508	3423
871	5658	5271	5765	5953	5821	9266	9619	9087	9108	9368	18633	18669	19526	19057	18828	28396	28170	28723	28141	28359	38105	37333	38338	37611	37743		871	495	528	518	547	545	786	808	851	790	850	1747	1639	1672	1682	1822	2532	2592	2668	2605	2597	3512	3426
872	5680	5287	5798	5977	5843	9301	9658	9127	9142	9402	18698	18737	19608	19132	18896	28488	28273	28823	28253	28476	38261	37488	38486	37736	37896		872	499	528	518	551	545	788	808	854	792	852	1748	1640	1677	1685	1825	2538	2596	2680	2613	2596	3517	3434
873	5705	5311	5822	5998	5860	9342	9690	9158	9163	9431	18754	18815	19687	19210	18964	28573	28356	28938	28361	28600	38398	37621	38614	37909	38021		873	499	528	519	550	549	788	809	855	792	859	1750	1644	1682	1690	1828	2542	2598	2687	2616	2597	3523	3438
874	5722	5333	5843	6017	5874	9380	9726	9190	9198	9470	18829	18878	19771	19274	19023	28672	28472	29059	28460	28699	38547	37747	38734	38065	38181		874	500	533	519	550	551	791	809	858	792	861	1751	1647	1684	1693	1831	2544	2600	2693	2621	2603	3531	3438
875	5745	5355	5868	6039	5896	9412	9764	9229	9234	9506	18900	18938	19859	19355	19091	28785	28574	29164	28555	28813	38674	37870	38880	38194	38326		875	500	533	519	550	551	792	809	859	792	861	1752	1647	1686	1695	1832	2549	2601	2704	2624	2607	3539	3441
876	5760	5375	5892	6065	5917	9452	9806	9258	9271	9545	18974	19002	19921	19430	19163	28899	28659	29290	28667	28908	38826	38016	39011	38342	38474		876	503	533	519	553	551	792	809	859	792	864	1758	1647	1685	1699	1832	2553	2604	2705	2626	2618	3542	3447
877	5790	5392	5912	6086	5942	9492	9845	9300	9306	9588	19031	19059	19989	19506	19237	28986	28762	29420	28773	29022	38971	38152	39139	38497	38615		877	505	533	520	553	552	792	809	861	792	864	1761	1648	1689	1700	1833	2557	2604	2709	2629	2621	3550	3447
878	5811	5412	5932	6108	5969	9541	9879	9347	9348	9624	19096	19121	20058	19582	19319	29081	28864	29533	28885	29131	39102	38301	39300	38620	38757		878	505	535	521	553	553	793	809	861	792	864	1764	1648	1689	1700	1834	2559	2605	2711	2632	2624	3554	3454
879	5842	5439	5958	6148	5991	9577	9927	9369	9390	9664	19183	19191	20121	19636	19393	29199	28959	29640	28993	29244	39252	38438	39456	38785	38894		879	505	536	521	557	553	794	810	861	792	867	1765	1654	1690	1703	1837	2563	2605	2720	2637	2627	3554	3458
880	5869	5463	5982	6171	6010	9614	9961	9416	9428	9692	19255	19260	20175	19726	19476	29311	29087	29753	29096	29334	39398	38577	39608	38932	39022		880	505	536	522	560	553	794	811	861	792	872	1765	1656	1694	1704	1838	2565	2607	2722	2639	2630	3561	3459
881	5891	5492	6000	6188	6027	9648	9989	9459	9459	9724	19326	19328	20255	19796	19545	29436	29189	29855	29180	29446	39539	38717	39745	39080	39175		881	506	536	522	561	560	797	811	861	792	873	1766	1656	1695	1704	1841	2575	2616	2730	2646	2631	3567	3463
882	5918	5517	6016	6201	6044	9676	10027	9500	9501	9755	19397	19412	20341	19869	19608	29537	29286	29954	29289	29557	39704	38862	39907	39221	39348		882	506	537	526	563	560	797	811	863	793	874	1768	1657	1697	1707	1844	2579	2615	2732	2649	2632	3570	3463
883	5943	5539	6034	6231	6061	9709	10073	9536	9539	9782	19461	19481	20413	19947	19698	29647	29407	30067	29400	29676	39839	39000	40049	39352	39501		883	506	537	526	563	560	799	814	864	796	875	1768	1660	1699	1709	1850	2581	2616	2741	2652	2635	3578	3467
884	5966	5559	6050	6258	6081	9745	10116	9573	9577	9806	19537	19559	20487	20010	19776	29750	29525	30201	29497	29794	39980	39141	40215	39519	39650		884	506	539	526	567	560	801	814	868	798	875	1768	1667	1698	1710	1851	2582	2617	2741	2655	2640	3580	3467
885	5982	5580	6069	6267	6102	9779	10156	9604	9624	9842	19609	19629	20549	20071	19850	29850	29626	30316	29611	29897	40143	39295	40357	39668	39795		885	506	540	526	568	560	801	815	868	800	876	1769	1668	1702	1711	1853	2587	2619	2749	2663	2642	3586	3478
886	6013	5599	6094	6291	6117	9817	10198	9646	9658	9875	19693	19697	20612	20140	19925	29961	29738	30422	29723	30021	40295	39450	40476	39831	39943		886	506	542	533	569	560	802	815	868	800	878	1769	1672	1703	1712	1856	2589	2623	2751	2667	2649	3588	3480
887	6044	5624	6116	6315	6138	9843	10237	9681	9703	9908	19768	19782	20687	20215	19998	30087	29839	30544	29843	30127	40436	39596	40607	39955	40090		887	507	542	535	570	560	804	816	868	800	879	1774	1675	1704	1718	1856	2593	2625	2752	2670	2650	3588	3492
888	6067	5645	6136	6337	6173	9875	10275	9722	9749	9948	19855	19853	20759	20284	20071	30210	29940	30657	29943	30245	40570	39717	40739	40087	40219		888	507	542	536	571	560	807	819	869	800	879	1777	1676	1705	1727	1860	2595	2630	2757	2676	2652	3603	3495
889	6099	5656	6163	6365	6198	9907	10310	9748	9795	9982	19935	19947	20832	20348	20151	30347	30052	30794	30066	30355	40723	39853	40905	40247	40376		889	508	542	536	571	560	807	819	869	801	879	1779	1680	1708	1734	1864	2600	2632	2759	2683	2658	3608	3496
890	6119	5676	6186	6395	6228	9940	10340	9778	9840	10035	20014	20025	20913	20428	20229	30464	30156	30900	30183	30465	40860	39991	41056	40389	40516		890	509	542	539	573	559	807	821	869	801	880	1786	1679	1708	1737	1868	2605	2640	2762	2698	2661	3611	3495
891	6131	5696	6204	6423	6244	9966	10374	9813	9876	10062	20078	20112	20979	20497	20295	30575	30277	31019	30295	30575	40995	40126	41200	40531	40658		891	509	543	541	575	560	808	823	869	803	880	1788	1680	1709	1739	1868	2609	2642	2767	2699	2663	3615	3495
892	6149	5709	6232	6443	6276	10003	10416	9845	9914	10090	20152	20181	21070	20567	20373	30697	30396	31138	30416	30670	41142	40263	41368	40686	40813		892	511	544	545	575	560	810	823	870	804	879	1794	1681	1709	1742	1870	2610	2645	2773	2704	2666	3623	3505
893	6174	5726	6250	6464	6304	10045	10454	9874	9945	10131	20225	20264	21169	20650	20453	30808	30488	31247	30527	30775	41303	40401	41518	40842	40971		893	511	545	545	576	560	810	822	873	811	880	1795	1684	1708	1743	1872	2613	2648	2776	2710	2671	3632	3509
894	6195	5752	6273	6499	6324	10078	10505	9909	9977	10177	20298	20334	21248	20721	20535	30927	30586	31367	30633	30881	41448	40531	41663	40991	41126		894	512	545	547	576	560	809	825	874	813	880	1798	1684	1712	1743	1876	2616	2652	2777	2713	2672	3635	3517
895	6215	5778	6290	6519	6352	10112	10547	9957	10019	10209	20379	20434	21331	20810	20607	31037	30686	31483	30753	30980	41597	40672	41809	41157	41269		895	513	547	547	577	561	812	826	877	813	881	1799	1687	1718	1744	1878	2623	2654	2782	2719	2675	3644	3522
896	6246	5791	6306	6543	6371	10152	10591	9998	10057	10252	20482	20494	21405	20886	20685	31150	30804	31604	30890	31082	41768	40838	41967	41325	41403		896	512	547	548	581	561	812	828	879	813	881	1802	1689	1718	1747	1882	2624	2662	2783	2722	2684	3650	3525
897	6272	5817	6337	6575	6394	10183	10637	10034	10084	10281	20550	20580	21488	20949	20761	31270	30923	31738	31000	31210	41916	40991	42130	41493	41559		897	512	547	548	582	561	812	831	879	813	883	1806	1694	1722	1750	1887	2628	2667	2788	2729	2691	3658	3530
898	6299	5834	6360	6601	6417	10218	10687	10070	10120	10320	20611	20652	21582	21031	20833	31374	31047	31850	31113	31323	42069	41130	42270	41648	41714		898	512	548	547	581	561	813	830	880	814	885	1807	1697	1724	1753	1887	2630	2671	2791	2729	2696	3663	3537
899	6322	5853	6382	6618	6444	10265	10729	10111	10155	10345	20690	20730	21658	21105	20914	31475	31167	31961	31219	31448	42207	41295	42410	41812	41860		899	512	549	547	581	562	814	832	880	814	885	1810	1702	1725	1753	1890	2633	2672	2803	2732	2701	3678	3553
900	6346	5878	6397	6646	6455	10295	10767	10140	10197	10387	20768	20816	21726	21173	20988	31580	31296	32057	31325	31557	42359	41477	42580	41959	42031		900	514	551	547	581	565	817	839	881	815	891	1811	1701	1730	1758	1893	2637	2677	2807	2740	2703	3683	3560
901	6372	5905	6425	6659	6470	10330	10819	10184	10225	10432	20842	20883	21801	21253	21051	31698	31415	32166	31444	31677	42501	41639	42755	42118	42193		901	514	552	548	587	565	818	843	882	815	896	1813	1704	1733	1761	1905	2639	2685	2808	2741	2708	3687	3565
902	6397	5932	6451	6691	6494	10370	10859	10224	10279	10475	20919	20968	21887	21330	21130	31827	31519	32278	31557	31783	42655	41791	42914	42293	42356		902	514	552	548	590	566	818	843	884	815	896	1821	1706	1738	1761	1906	2639	2687	2810	2751	2716	3694	3569
903	6418	5957	6474	6723	6523	10403	10903	10257	10308	10505	20998	21042	21979	21406	21208	31941	31639	32372	31684	31903	42812	41947	43071	42479	42503		903	514	552	547	591	566	818	844	887	816	896	1825	1707	1740	1763	1907	2651	2691	2812	2756	2719	3702	3574
904	6441	5972	6496	6748	6544	10449	10947	10299	10345	10540	21071	21114	22078	21470	21292	32048	31752	32509	31800	32007	42966	42089	43247	42648	42657		904	516	552	549	592	566	823	845	889	820	898	1827	1708	1744	1766	1911	2653	2696	2816	2760	2725	3707	3578
905	6466	5991	6525	6775	6563	10490	10977	10336	10384	10586	21144	21189	22159	21553	21376	32160	31877	32605	31920	32152	43114	42260	43412	42812	42794		905	516	552	549	592	567	824	847	889	822	904	1831	1712	1745	1768	1912	2654	2698	2817	2760	2732	3714	3589
906	6487	6014	6544	6809	6585	10530	11008	10369	10417	10618	21222	21256	22224	21626	21452	32266	31987	32713	32047	32272	43303	42431	43570	42978	42957		906	516	553	555	594	569	827	849	889	823	905	1834	1716	1748	1770	1914	2656	2701	2833	2760	2740	3718	3597
907	6519	6031	6566	6832	6607	10582	11053	10409	10460	10657	21302	21331	22301	21714	21526	32390	32109	32841	32165	32388	43455	42602	43730	43149	43105		907	516	553	558	595	569	828	848	889	822	908	1836	1719	1749	1772	1921	2664	2706	2835	2764	2742	3725	3606
908	6545	6058	6594	6859	6628	10605	11090	10440	10491	10694	21387	21412	22382	21790	21595	32498	32209	32966	32255	32500	43614	42755	43873	43296	43272		908	517	554	559	595	571	827	849	889	822	910	1839	1721	1751	1779	1923	2672	2711	2838	2771	2753	3730	3608
909	6566	6083	6614	6883	6645	10652	11138	10476	10531	10738	21470	21480	22472	21874	21689	32616	32334	33068	32401	32635	43752	42938	44012	43430	43446		909	517	557	559	595	573	828	850	890	822	910	1840	1721	1753	1780	1927	2674	2713	2841	2776	2754	3732	3616
910	6596	6096	6637	6906	6672	10705	11180	10513	10568	10775	21556	21547	22541	21950	21760	32730	32465	33182	32507	32745	43931	43092	44167	43588	43593		910	517	557	559	596	573	828	854	891	821	910	1845	1723	1759	1784	1937	2678	2714	2844	2779	2762	3736	3620
911	6624	6119	6660	6936	6697	10739	11211	10559	10598	10809	21617	21624	22637	22011	21841	32864	32587	33287	32624	32878	44110	43246	44326	43761	43736		911	518	559	559	600	575	831	854	891	822	915	1847	1727	1764	1786	1938	2687	2719	2853	2785	2768	3742	3627
912	6646	6146	6688	6970	6724	10778	11250	10597	10640	10843	21699	21707	22720	22092	21918	32980	32703	33386	32750	33016	44268	43415	44473	43914	43890		912	520	561	559	602	576	831	857	891	824	915	1848	1731	1767	1790	1942	2689	2722	2857	2787	2775	3750	3631
913	6674	6173	6719	6993	6741	10818	11301	10644	10669	10883	21795	21819	22802	22168	22006	33095	32832	33503	32883	33141	44414	43590	44658	44068	44067		913	520	562	559	600	576	833	858	891	825	915	1850	1732	1770	1791	1942	2693	2727	2863	2795	2782	3755	3639
914	6704	6198	6744	7021	6768	10860	11339	10675	10709	10923	21868	21894	22885	22261	22104	33221	32951	33623	32984	33259	44579	43738	44814	44222	44205		914	521	562	560	600	578	834	860	892	825	918	1850	1733	1772	1792	1942	2699	2727	2867	2802	2785	3761	3649
915	6723	6226	6768	7054	6799	10904	11386	10718	10738	10962	21952	21967	22975	22335	22191	33350	33093	33728	33103	33395	44724	43888	44987	44387	44344		915	521	562	560	604	579	833	860	893	826	922	1854	1735	1773	1794	1949	2700	2730	2871	2804	2791	3764	3654
916	6744	6250	6787	7084	6816	10946	11428	10757	10787	10996	22029	22038	23045	22424	22260	33463	33221	33855	33227	33530	44884	44074	45142	44524	44483		916	523	563	563	606	583	834	861	893	826	924	1861	1736	1772	1795	1948	2707	2730	2873	2812	2797	3768	3658
917	6768	6274	6809	7111	6834	10991	11468	10796	10826	11037	22118	22103	23135	22510	22353	33588	33337	33987	33364	33650	45037	44229	45298	44669	44643		917	523	566	563	607	583	834	861	894	826	925	1862	1737	1779	1797	1949	2706	2735	2877	2818	2800	3774	3660
918	6791	6301	6836	7129	6855	11031	11503	10829	10861	11083	22221	22188	23218	22590	22425	33714	33473	34113	33477	33764	45216	44393	45479	44825	44809		918	523	566	563	608	585	837	863	894	827	926	1863	1738	1788	1796	1951	2708	2735	2880	2822	2809	3782	3664
919	6814	6320	6856	7158	6886	11070	11545	10864	10897	11112	22296	22242	23312	22681	22483	33834	33582	34238	33607	33881	45379	44572	45618	45002	44976		919	525	567	565	609	586	841	863	897	828	926	1867	1740	1791	1796	1951	2711	2739	2881	2825	2814	3783	3668
920	6844	6340	6879	7184	6908	11099	11584	10895	10936	11159	22378	22320	23386	22770	22552	33956	33718	34375	33731	34017	45553	44731	45794	45154	45139		920	525	568	565	609	586	842	863	897	828	930	1869	1740	1799	1796	1954	2717	2739	2887	2829	2816	3785	3673
921	6859	6356	6921	7213	6933	11143	11616	10931	10966	11201	22462	22406	23471	22858	22622	34094	33830	34502	33851	34148	45727	44901	45960	45302	45305		921	525	572	567	610	588	842	863	897	828	933	1871	1742	1802	1796	1956	2721	2743	2890	2832	2818	3789	3675
922	6885	6382	6945	7251	6945	11183	11658	10969	11011	11245	22529	22476	23544	22952	22715	34214	33949	34604	33995	34277	45901	45052	46128	45475	45497		922	525	572	568	610	588	846	867	897	830	934	1873	1742	1804	1796	1958	2721	2746	2893	2836	2819	3797	3685
923	6905	6401	6962	7279	6961	11216	11690	11005	11044	11298	22615	22542	23628	23036	22793	34346	34074	34731	34117	34417	46069	45217	46287	45638	45647		923	526	574	571	612	588	847	868	897	831	934	1878	1744	1805	1802	1963	2725	2749	2895	2843	2823	3798	3690
924	6930	6427	6991	7307	6990	11244	11721	11047	11093	11342	22694	22634	23727	23138	22872	34473	34180	34857	34252	34541	46237	45390	46448	45811	45815		924	525	574	574	613	588	848	872	898	832	935	1882	1748	1809	1804	1969	2729	2751	2895	2848	2828	3804	3694
925	6954	6450	7027	7327	7013	11279	11757	11074	11142	11391	22781	22718	23824	23220	22970	34601	34316	34973	34388	34657	46400	45556	46611	45994	45989		925	528	578	574	613	589	850	883	898	832	937	1885	1751	1810	1807	1968	2738	2761	2901	2856	2828	3808	3702
926	6982	6474	7059	7359	7047	11306	11787	11118	11182	11426	22864	22787	23925	23318	23052	34734	34447	35088	34515	34811	46567	45711	46782	46163	46167		926	528	578	574	618	589	855	884	898	835	938	1888	1761	1811	1809	1970	2740	2767	2903	2857	2831	3818	3707
927	7011	6493	7091	7385	7078	11350	11829	11155	11215	11465	22944	22865	24009	23404	23132	34865	34570	35205	34648	34957	46748	45852	46950	46321	46337		927	531	578	577	620	589	856	884	900	836	941	1889	1767	1811	1810	1972	2746	2769	2906	2866	2836	3830	3716
928	7040	6527	7124	7417	7107	11391	11873	11194	11242	11511	23036	22955	24094	23488	23201	34982	34694	35335	34766	35046	46927	46021	47129	46502	46497		928	531	579	577	619	593	859	885	900	841	940	1891	1770	1810	1813	1974	2750	2771	2911	2869	2837	3834	3720
929	7065	6553	7147	7452	7140	11436	11922	11234	11282	11547	23117	23033	24182	23573	23268	35107	34824	35463	34887	35171	47124	46158	47310	46687	46693		929	531	580	580	618	593	860	888	901	843	940	1891	1773	1812	1815	1976	2752	2774	2916	2876	2841	3837	3726
930	7080	6587	7173	7485	7171	11482	11965	11272	11328	11598	23198	23103	24280	23653	23353	35236	34967	35587	35012	35321	47298	46345	47492	46846	46867		930	531	580	580	617	594	864	888	901	844	940	1891	1773	1817	1816	1976	2758	2776	2922	2881	2845	3844	3729
931	7105	6611	7196	7517	7204	11524	12010	11313	11362	11636	23275	23181	24365	23732	23462	35370	35096	35711	35146	35451	47447	46504	47666	47018	47024		931	531	580	580	618	594	865	889	901	845	942	1892	1775	1822	1821	1975	2757	2781	2926	2887	2847	3846	3731
932	7125	6638	7220	7543	7229	11571	12053	11367	11404	11673	23363	23275	24445	23834	23537	35506	35220	35840	35285	35583	47626	46677	47857	47175	47212		932	532	582	581	618	596	865	889	901	845	945	1895	1780	1824	1822	1978	2760	2789	2932	2889	2850	3853	3734
933	7151	6667	7252	7561	7251	11612	12104	11402	11445	11713	23458	23368	24523	23937	23608	35625	35350	35970	35417	35697	47815	46855	48032	47356	47393		933	533	585	582	619	598	865	891	903	845	945	1896	1780	1825	1828	1976	2763	2790	2943	2888	2852	3861	3742
934	7173	6691	7269	7591	7288	11665	12152	11449	11479	11746	23545	23456	24611	24030	23706	35750	35489	36116	35524	35824	48003	47021	48241	47565	47570		934	534	585	582	620	598	866	892	903	846	948	1900	1780	1827	1835	1989	2765	2796	2945	2892	2857	3865	3743
935	7203	6719	7292	7617	7321	11724	12206	11482	11538	11784	23631	23541	24710	24127	23795	35889	35612	36240	35651	35966	48168	47195	48414	47718	47727		935	535	586	583	621	599	866	892	903	848	950	1900	1782	1829	1840	1990	2770	2797	2952	2892	2861	3873	3750
936	7227	6737	7318	7647	7343	11769	12257	11522	11586	11822	23721	23627	24799	24203	23873	36010	35763	36359	35783	36094	48332	47370	48578	47910	47904		936	536	587	584	620	600	871	893	906	847	951	1904	1785	1829	1845	1992	2774	2802	2956	2898	2866	3880	3760
937	7252	6756	7343	7669	7373	11816	12292	11558	11630	11867	23804	23699	24898	24299	23955	36145	35890	36487	35915	36216	48537	47527	48741	48092	48083		937	536	588	586	624	600	872	894	908	850	953	1907	1788	1829	1848	1995	2777	2805	2966	2903	2877	3881	3761
938	7276	6775	7362	7696	7405	11857	12342	11601	11674	11914	23891	23794	24993	24381	24051	36280	36043	36619	36041	36354	48706	47692	48928	48277	48250		938	537	590	587	625	600	872	893	913	851	953	1910	1789	1829	1849	1995	2779	2808	2970	2908	2881	3890	3766
939	7303	6811	7388	7727	7439	11894	12391	11644	11705	11971	23990	23888	25087	24465	24140	36432	36176	36747	36181	36481	48866	47872	49115	48448	48439		939	538	592	592	626	600	874	898	915	851	955	1913	1792	1835	1854	1996	2787	2809	2973	2912	2884	3894	3771
940	7331	6830	7404	7758	7459	11946	12430	11684	11746	12011	24089	23954	25181	24557	24231	36561	36331	36888	36304	36609	49051	48047	49289	48604	48626		940	539	593	592	627	600	874	899	918	852	960	1917	1793	1834	1857	1998	2790	2815	2972	2914	2888	3900	3775
941	7358	6861	7434	7781	7500	11992	12486	11716	11785	12047	24191	24046	25282	24644	24321	36695	36459	37014	36416	36755	49225	48192	49471	48795	48807		941	539	593	596	626	601	874	902	923	854	961	1922	1793	1837	1858	1999	2800	2821	2978	2924	2892	3909	3782
942	7398	6887	7461	7807	7528	12044	12538	11753	11831	12101	24279	24116	25401	24736	24396	36816	36616	37157	36548	36907	49433	48379	49665	48966	48989		942	539	593	596	625	602	874	902	924	854	962	1927	1799	1846	1858	2001	2808	2830	2983	2930	2895	3914	3790
943	7419	6909	7490	7837	7556	12084	12584	11790	11866	12140	24389	24213	25497	24832	24494	36962	36775	37265	36671	37052	49622	48559	49853	49158	49181		943	539	593	596	626	602	880	902	924	856	963	1929	1799	1849	1864	2004	2813	2838	2985	2935	2896	3922	3792
944	7445	6935	7523	7861	7584	12125	12617	11836	11912	12195	24488	24320	25589	24924	24576	37116	36905	37415	36805	37165	49811	48751	50046	49364	49375		944	539	595	597	626	603	884	903	924	861	963	1932	1799	1851	1868	2009	2827	2844	2991	2943	2896	3934	3799
945	7468	6967	7547	7894	7611	12176	12671	11868	11954	12239	24581	24414	25679	25021	24666	37241	37031	37553	36942	37313	49977	48935	50267	49545	49560		945	539	595	597	629	604	884	906	923	861	964	1933	1801	1859	1870	2013	2829	2854	2994	2946	2903	3939	3809
946	7487	6999	7587	7926	7640	12214	12723	11906	12011	12292	24670	24489	25776	25116	24750	37385	37157	37685	37084	37463	50148	49121	50437	49705	49744		946	540	596	598	633	606	884	910	925	861	965	1934	1803	1859	1870	2022	2831	2858	2998	2951	2910	3941	3810
947	7517	7033	7621	7962	7665	12268	12761	11954	12060	12339	24744	24578	25863	25204	24847	37538	37275	37801	37209	37590	50349	49305	50619	49887	49940		947	544	603	598	635	608	885	911	925	865	968	1935	1805	1862	1877	2023	2844	2862	3010	2962	2915	3945	3818
948	7544	7061	7655	7996	7691	12310	12811	11999	12094	12386	24827	24660	25975	25314	24944	37685	37433	37936	37319	37743	50545	49478	50825	50061	50132		948	545	603	598	635	608	886	912	927	866	968	1935	1807	1864	1879	2029	2852	2865	3014	2970	2922	3946	3823
949	7572	7088	7689	8018	7723	12353	12864	12054	12147	12444	24940	24747	26077	25402	25032	37813	37567	38078	37470	37870	50736	49677	51032	50258	50306		949	549	605	599	636	609	888	915	930	866	970	1938	1813	1868	1879	2029	2857	2872	3018	2976	2925	3952	3825
950	7597	7112	7711	8043	7747	12408	12913	12099	12193	12488	25024	24813	26151	25489	25133	37968	37696	38219	37603	38022	50968	49855	51225	50445	50482		950	550	607	599	636	610	888	916	931	869	973	1939	1813	1869	1878	2038	2864	2876	3024	2981	2927	3962	3834
951	7625	7133	7736	8069	7780	12455	12962	12139	12239	12545	25101	24924	26263	25588	25233	38104	37857	38370	37742	38206	51166	50036	51415	50622	50662		951	552	608	598	642	612	889	918	931	871	974	1947	1813	1871	1880	2043	2865	2883	3028	2983	2930	3964	3841
952	7654	7167	7766	8098	7808	12499	13012	12190	12286	12589	25195	25015	26345	25690	25326	38262	37971	38519	37887	38338	51375	50188	51579	50805	50852		952	553	608	598	643	612	893	918	932	872	979	1949	1812	1875	1883	2044	2866	2887	3036	2985	2938	3973	3843
953	7684	7197	7793	8130	7834	12537	13040	12231	12330	12651	25271	25098	26441	25801	25421	38397	38100	38663	38059	38470	51540	50354	51783	51001	51060		953	559	610	599	642	614	893	921	932	875	978	1953	1813	1876	1887	2047	2874	2889	3041	2993	2944	3982	3850
954	7714	7228	7826	8157	7853	12574	13085	12268	12382	12716	25367	25181	26546	25898	25500	38555	38244	38779	38216	38627	51757	50567	51986	51185	51252		954	560	610	599	644	613	896	921	934	877	982	1958	1814	1881	1890	2049	2877	2895	3042	3000	2952	3988	3859
955	7744	7256	7862	8184	7885	12622	13131	12321	12423	12767	25450	25270	26634	25980	25604	38719	38383	38923	38371	38757	51989	50754	52180	51365	51459		955	560	610	601	644	614	901	923	937	883	986	1964	1814	1885	1893	2054	2882	2897	3049	3001	2954	3994	3863
956	7773	7292	7888	8212	7917	12671	13174	12361	12459	12814	25551	25366	26736	26071	25693	38861	38517	39048	38508	38921	52209	50948	52387	51548	51651		956	562	610	601	644	615	908	924	938	886	987	1969	1821	1886	1894	2054	2885	2902	3052	3002	2958	4007	3868
957	7798	7327	7922	8247	7936	12725	13227	12392	12497	12874	25641	25474	26816	26169	25789	39018	38649	39192	38647	39052	52386	51131	52582	51742	51826		957	562	613	602	645	616	909	926	939	886	987	1969	1822	1890	1892	2059	2891	2906	3056	3006	2962	4015	3871
958	7814	7355	7955	8276	7955	12772	13272	12428	12542	12927	25735	25572	26927	26259	25887	39187	38815	39333	38793	39183	52615	51333	52758	51932	52027		958	562	613	602	647	616	911	929	943	887	988	1979	1827	1893	1895	2063	2894	2907	3066	3013	2965	4021	3877
959	7841	7386	7982	8305	7985	12819	13339	12480	12598	12975	25839	25675	27032	26354	25990	39343	38965	39483	38928	39331	52789	51506	52936	52110	52214		959	562	614	602	647	616	913	930	943	888	990	1979	1832	1895	1899	2072	2899	2909	3069	3016	2967	4023	3885
960	7866	7410	8010	8336	8019	12874	13386	12533	12643	13024	25947	25768	27129	26459	26082	39485	39084	39647	39089	39470	52987	51699	53128	52299	52412		960	562	618	602	647	617	916	932	944	890	990	1981	1837	1896	1900	2080	2903	2914	3078	3016	2973	4032	3891
961	7891	7427	8044	8365	8050	12919	13428	12568	12695	13069	26050	25857	27231	26561	26177	39628	39232	39823	39234	39590	53175	51890	53321	52502	52603		961	562	618	605	646	616	916	936	945	894	990	1982	1839	1902	1904	2088	2907	2914	3087	3018	2980	4047	3895
962	7918	7461	8072	8387	8073	12977	13488	12604	12744	13119	26164	25957	27309	26673	26263	39762	39368	39979	39372	39719	53388	52067	53517	52706	52799		962	562	618	606	648	616	918	937	945	894	993	1986	1842	1903	1905	2093	2908	2917	3093	3024	2985	4054	3902
963	7943	7481	8104	8406	8105	13021	13531	12654	12805	13168	26258	26045	27417	26748	26342	39911	39528	40122	39503	39865	53614	52256	53729	52890	52981		963	565	620	606	648	620	921	938	946	898	995	1990	1846	1907	1914	2094	2911	2918	3095	3028	2990	4062	3905
964	7969	7514	8141	8428	8134	13059	13598	12704	12851	13225	26372	26143	27515	26858	26457	40055	39667	40294	39652	39986	53824	52456	53932	53078	53174		964	566	620	607	651	621	923	940	948	899	995	1990	1852	1909	1917	2095	2916	2921	3099	3032	2995	4069	3920
965	7999	7539	8177	8456	8168	13111	13660	12744	12900	13260	26479	26220	27627	26966	26554	40200	39813	40424	39794	40117	54039	52639	54133	53258	53361		965	567	619	607	651	622	923	943	949	902	994	1991	1859	1908	1918	2096	2919	2925	3106	3037	3002	4072	3931
966	8029	7566	8214	8487	8197	13160	13699	12805	12947	13307	26573	26334	27723	27078	26653	40368	39949	40586	39943	40253	54264	52833	54326	53432	53552		966	570	621	607	651	623	923	943	949	903	996	1992	1863	1908	1919	2100	2925	2941	3114	3037	3007	4078	3934
967	8060	7590	8238	8521	8216	13201	13762	12852	13004	13353	26663	26436	27824	27191	26746	40524	40083	40755	40091	40399	54480	53032	54518	53648	53720		967	570	621	607	653	624	922	944	949	904	998	1993	1865	1908	1921	2103	2937	2950	3119	3043	3007	4084	3945
968	8094	7608	8272	8555	8250	13248	13808	12915	13073	13407	26747	26538	27928	27286	26848	40671	40260	40880	40250	40533	54671	53219	54685	53846	53937		968	571	622	607	654	625	922	945	950	907	999	1995	1868	1910	1925	2103	2943	2958	3126	3046	3013	4097	3947
969	8117	7640	8305	8589	8266	13295	13859	12974	13110	13446	26865	26635	28030	27388	26926	40815	40387	41048	40408	40682	54876	53416	54894	54049	54122		969	571	622	610	655	627	926	946	950	908	999	1997	1868	1913	1932	2106	2943	2967	3134	3055	3016	4112	3952
970	8146	7666	8334	8621	8298	13352	13922	13022	13148	13492	26982	26736	28144	27480	27027	40942	40530	41197	40547	40854	55075	53600	55104	54235	54342		970	571	622	610	656	627	926	948	951	913	1004	2001	1872	1913	1935	2110	2954	2970	3142	3061	3017	4118	3955
971	8178	7706	8362	8657	8326	13396	13968	13070	13183	13536	27087	26842	28255	27567	27140	41089	40691	41339	40687	41007	55255	53796	55304	54441	54539		971	571	622	611	656	627	929	949	951	913	1007	2005	1877	1915	1936	2117	2960	2974	3149	3067	3019	4126	3963
972	8194	7737	8397	8683	8357	13444	14012	13116	13235	13582	27194	26955	28353	27655	27265	41244	40822	41509	40841	41153	55476	53984	55502	54671	54762		972	570	622	611	656	628	931	951	951	915	1009	2014	1879	1919	1938	2119	2968	2983	3153	3074	3021	4138	3968
973	8228	7762	8421	8709	8396	13501	14065	13151	13281	13630	27300	27085	28464	27745	27359	41372	40951	41658	40975	41286	55681	54179	55735	54878	54959		973	570	625	613	656	634	933	953	954	916	1009	2020	1884	1925	1944	2123	2975	2987	3154	3079	3033	4146	3968
974	8250	7791	8448	8734	8433	13550	14110	13209	13321	13682	27404	27195	28571	27848	27459	41517	41111	41826	41123	41429	55897	54370	55944	55087	55162		974	571	625	617	656	636	934	953	956	917	1010	2023	1885	1928	1947	2128	2982	2998	3156	3079	3037	4155	3975
975	8286	7814	8481	8771	8467	13592	14158	13258	13368	13744	27491	27296	28672	27950	27560	41693	41265	41968	41275	41582	56131	54579	56131	55293	55372		975	572	625	617	659	637	934	956	957	918	1014	2029	1892	1931	1953	2132	2985	3003	3160	3084	3042	4163	3983
976	8319	7838	8504	8805	8497	13635	14206	13294	13425	13781	27576	27412	28786	28059	27662	41846	41414	42129	41416	41740	56307	54771	56336	55478	55552		976	572	628	618	659	638	934	960	958	918	1014	2033	1892	1935	1957	2132	2985	3010	3168	3094	3046	4170	3992
977	8343	7864	8527	8833	8542	13688	14257	13331	13489	13832	27690	27509	28888	28153	27753	42010	41572	42314	41568	41908	56492	54999	56544	55696	55786		977	572	629	618	659	638	936	961	962	918	1016	2038	1895	1938	1961	2137	2988	3014	3175	3113	3054	4180	4006
978	8373	7894	8561	8854	8574	13731	14317	13374	13521	13893	27782	27607	28973	28266	27859	42161	41713	42479	41723	42072	56677	55193	56736	55876	56008		978	572	629	618	660	640	942	963	963	920	1017	2045	1897	1941	1966	2142	2994	3018	3183	3126	3057	4187	4013
979	8401	7929	8592	8897	8619	13783	14369	13424	13571	13945	27900	27707	29072	28380	27964	42310	41869	42648	41883	42229	56893	55383	56943	56083	56209		979	571	630	618	662	642	943	963	965	923	1018	2048	1899	1945	1968	2148	3001	3024	3194	3132	3061	4193	4023
980	8433	7963	8629	8927	8650	13836	14412	13472	13616	13987	28002	27815	29187	28481	28076	42469	42006	42803	42033	42377	57096	55590	57187	56280	56417		980	571	633	618	663	643	943	963	968	925	1018	2050	1901	1946	1970	2151	3005	3031	3197	3135	3069	4196	4031
981	8465	7997	8657	8961	8672	13872	14465	13531	13658	14045	28121	27923	29294	28584	28172	42616	42185	42974	42177	42551	57296	55815	57425	56503	56647		981	573	633	620	667	647	945	964	972	925	1018	2051	1905	1947	1970	2155	3008	3035	3203	3146	3070	4199	4038
982	8491	8018	8689	8990	8705	13937	14526	13572	13714	14097	28239	28023	29402	28688	28281	42767	42359	43142	42324	42730	57478	56018	57615	56715	56857		982	573	636	620	668	647	946	965	976	928	1019	2057	1912	1951	1972	2155	3013	3036	3211	3149	3072	4214	4041
983	8534	8048	8725	9020	8738	13984	14578	13625	13774	14152	28344	28116	29528	28791	28398	42920	42506	43321	42497	42871	57671	56216	57838	56934	57038		983	577	636	626	668	647	949	970	980	934	1020	2058	1913	1952	1973	2158	3018	3041	3224	3153	3074	4223	4050
984	8581	8073	8761	9057	8760	14039	14625	13678	13829	14210	28455	28217	29616	28899	28508	43057	42670	43479	42637	43029	57909	56440	58043	57123	57250		984	578	636	625	668	647	949	971	984	935	1020	2059	1922	1961	1972	2162	3022	3045	3231	3158	3079	4233	4054
985	8603	8103	8792	9076	8781	14078	14696	13714	13897	14264	28542	28320	29728	29022	28616	43211	42843	43651	42787	43164	58119	56641	58267	57336	57461		985	578	636	626	671	648	950	972	984	935	1020	2063	1923	1963	1978	2168	3028	3056	3238	3162	3080	4237	4061
986	8635	8128	8827	9102	8816	14127	14759	13766	13948	14324	28638	28429	29838	29111	28701	43385	43008	43837	42935	43337	58361	56874	58494	57527	57675		986	578	637	626	674	649	953	974	985	939	1023	2063	1926	1972	1979	2171	3032	3060	3238	3167	3089	4236	4063
987	8672	8165	8857	9135	8852	14170	14808	13825	13991	14377	28764	28535	29941	29219	28800	43559	43171	44019	43099	43520	58561	57058	58694	57739	57886		987	579	638	626	674	650	953	976	988	941	1028	2069	1931	1976	1982	2173	3030	3062	3247	3167	3100	4253	4070
988	8705	8194	8888	9172	8889	14221	14858	13878	14040	14424	28865	28645	30042	29312	28902	43731	43364	44175	43287	43688	58783	57258	58899	57940	58089		988	582	638	629	675	651	953	978	989	944	1028	2070	1942	1978	1983	2179	3041	3065	3254	3175	3108	4258	4079
989	8746	8221	8928	9205	8918	14272	14898	13936	14089	14467	28970	28752	30165	29415	29016	43864	43530	44350	43428	43847	59016	57451	59137	58150	58299		989	582	640	630	679	651	953	977	991	944	1030	2071	1943	1979	1985	2182	3045	3068	3262	3179	3115	4261	4091
990	8773	8248	8952	9236	8950	14322	14951	13992	14135	14520	29095	28883	30284	29511	29138	44035	43716	44519	43606	43999	59226	57663	59349	58376	58524		990	582	641	631	679	652	952	978	994	946	1032	2074	1945	1984	1993	2184	3054	3071	3273	3188	3115	4268	4100
991	8808	8273	8984	9272	8974	14381	15010	14057	14194	14566	29196	28998	30401	29622	29248	44213	43873	44680	43783	44158	59444	57891	59588	58600	58750		991	587	642	631	682	653	955	981	1000	946	1033	2076	1948	1989	1994	2187	3056	3073	3281	3193	3118	4281	4107
992	8843	8306	9008	9306	9008	14433	15066	14103	14233	14630	29291	29114	30508	29733	29364	44365	44033	44828	43925	44325	59664	58099	59810	58822	58987		992	589	642	632	683	653	955	981	1000	947	1039	2082	1949	1998	1996	2188	3060	3075	3283	3200	3123	4284	4109
993	8876	8340	9029	9340	9049	14478	15139	14159	14293	14687	29386	29210	30612	29833	29480	44511	44211	45003	44073	44485	59882	58309	60034	59013	59204		993	590	644	632	686	658	957	987	1003	947	1040	2085	1948	2002	2002	2190	3068	3082	3289	3209	3128	4290	4122
994	8899	8381	9061	9366	9075	14534	15201	14208	14337	14750	29513	29300	30740	29935	29558	44668	44373	45147	44228	44648	60115	58519	60231	59227	59402		994	590	647	632	686	661	961	987	1004	949	1041	2088	1950	2004	2003	2193	3071	3086	3289	3220	3135	4295	4128
995	8925	8405	9096	9402	9103	14590	15258	14257	14387	14807	29621	29404	30844	30037	29664	44843	44515	45329	44382	44810	60341	58746	60472	59441	59639		995	590	649	632	689	661	963	987	1004	952	1044	2089	1951	2009	2007	2196	3075	3088	3302	3225	3141	4304	4146
996	8961	8438	9123	9437	9146	14642	15315	14319	14424	14852	29727	29511	30979	30145	29774	45010	44670	45487	44552	44964	60547	58940	60699	59692	59834		996	590	650	632	690	661	964	988	1004	953	1047	2094	1955	2010	2007	2199	3081	3088	3307	3233	3149	4314	4147
997	8998	8468	9155	9462	9178	14701	15372	14361	14475	14920	29840	29623	31072	30267	29881	45186	44829	45658	44722	45122	60770	59165	60911	59904	60059		997	595	652	633	690	660	968	989	1007	953	1047	2094	1959	2015	2010	2202	3088	3091	3310	3236	3152	4317	4153
998	9027	8498	9184	9502	9214	14765	15439	14400	14540	14979	29940	29709	31166	30392	30003	45357	44988	45844	44894	45261	60981	59365	61117	60108	60262		998	597	652	634	690	662	970	989	1007	954	1049	2096	1962	2020	2019	2205	3094	3103	3322	3236	3154	4319	4161
999	9055	8531	9220	9535	9250	14815	15488	14458	14593	15035	30040	29814	31282	30492	30102	45527	45151	46018	45056	45413	61206	59582	61309	60349	60511		999	598	652	634	689	662	971	999	1008	956	1051	2100	1967	2026	2029	2210	3098	3106	3333	3241	3158	4324	4166
1000	9082	8562	9257	9570	9287	14884	15550	14513	14643	15101	30143	29913	31418	30606	30201	45704	45335	46158	45238	45605	61429	59846	61536	60565	60753		1000	599	653	633	689	662	971	1001	1011	958	1052	2104	1971	2028	2031	2211	3102	3118	3342	3248	3159	4333	4167
1001	9118	8591	9283	9605	9326	14942	15596	14558	14701	15157	30266	30017	31539	30708	30302	45874	45485	46338	45390	45770	61660	60055	61783	60791	60959		1001	601	657	635	690	665	971	1004	1010	959	1056	2104	1974	2030	2032	2213	3106	3128	3346	3250	3163	4337	4179
1002	9139	8617	9315	9640	9356	15005	15652	14606	14738	15205	30372	30120	31666	30819	30427	46056	45657	46547	45568	45953	61911	60296	61997	60999	61201		1002	603	658	635	690	668	974	1005	1011	964	1058	2106	1983	2036	2035	2225	3113	3137	3348	3253	3167	4342	4188
1003	9161	8653	9350	9673	9382	15047	15704	14654	14783	15245	30465	30223	31784	30941	30525	46226	45841	46734	45715	46139	62109	60513	62226	61241	61439		1003	610	659	639	694	670	975	1005	1012	968	1059	2113	1986	2039	2037	2229	3120	3141	3349	3264	3170	4353	4195
1004	9197	8687	9387	9718	9428	15107	15752	14724	14843	15293	30587	30336	31908	31051	30634	46382	46004	46905	45866	46328	62345	60748	62459	61472	61650		1004	610	660	645	695	670	976	1006	1013	970	1059	2118	1990	2039	2038	2236	3128	3145	3350	3268	3171	4358	4201
1005	9252	8715	9420	9768	9464	15167	15812	14785	14891	15353	30690	30446	32028	31173	30759	46564	46164	47079	46039	46494	62591	60954	62694	61703	61879		1005	614	660	645	696	671	978	1009	1016	970	1064	2126	1994	2043	2047	2240	3131	3156	3356	3274	3178	4369	4202
1006	9297	8738	9446	9814	9493	15217	15874	14852	14939	15426	30810	30573	32163	31292	30876	46734	46336	47233	46200	46655	62814	61192	62933	61944	62130		1006	615	664	646	698	671	979	1011	1017	973	1067	2126	1997	2045	2056	2245	3132	3166	3363	3274	3184	4378	4208
1007	9334	8770	9483	9842	9524	15263	15935	14905	14997	15486	30919	30691	32283	31378	30975	46906	46513	47407	46383	46821	63061	61403	63174	62163	62375		1007	615	670	646	698	672	980	1013	1018	973	1071	2129	2000	2049	2057	2246	3135	3174	3370	3289	3189	4385	4217
1008	9363	8808	9521	9879	9556	15315	15997	14965	15059	15556	31038	30822	32394	31494	31087	47079	46663	47595	46546	46978	63305	61619	63406	62403	62604		1008	622	670	648	698	675	979	1013	1022	973	1071	2132	2001	2052	2060	2249	3141	3180	3370	3299	3210	4393	4229
1009	9394	8846	9554	9925	9589	15372	16058	15023	15127	15614	31155	30975	32518	31607	31193	47239	46837	47779	46716	47147	63544	61867	63655	62632	62852		1009	623	671	649	699	675	978	1014	1022	974	1071	2140	2003	2055	2062	2252	3150	3181	3378	3304	3222	4409	4247
1010	9427	8879	9586	9969	9610	15422	16124	15081	15180	15675	31272	31093	32656	31746	31306	47438	47003	47969	46892	47316	63750	62112	63899	62864	63104		1010	623	672	651	700	676	979	1013	1021	975	1071	2143	2010	2054	2062	2254	3153	3184	3381	3305	3226	4416	4253
1011	9467	8912	9622	10005	9646	15481	16185	15152	15239	15731	31361	31201	32787	31871	31423	47614	47178	48129	47043	47499	63966	62328	64107	63099	63348		1011	623	675	651	701	678	981	1015	1023	977	1071	2144	2011	2055	2067	2259	3158	3186	3388	3315	3236	4422	4266
1012	9506	8943	9659	10047	9688	15532	16236	15198	15306	15794	31467	31318	32901	31998	31549	47810	47381	48317	47228	47669	64195	62556	64361	63313	63569		1012	623	675	652	701	679	981	1016	1029	977	1071	2150	2014	2059	2070	2262	3161	3195	3398	3322	3238	4427	4273
1013	9536	8973	9691	10083	9736	15581	16299	15251	15362	15857	31577	31460	33019	32113	31671	48001	47566	48498	47409	47869	64403	62798	64593	63524	63804		1013	624	677	654	701	680	981	1020	1035	977	1070	2156	2022	2061	2074	2264	3174	3199	3404	3328	3242	4432	4281
1014	9572	9001	9717	10115	9755	15635	16362	15300	15420	15909	31679	31586	33131	32247	31798	48167	47730	48697	47588	48037	64619	63002	64829	63769	64061		1014	624	677	656	701	682	980	1020	1043	979	1070	2159	2025	2067	2079	2270	3181	3205	3407	3334	3253	4440	4302
1015	9598	9024	9747	10154	9804	15694	16420	15353	15483	15969	31795	31671	33241	32354	31925	48363	47915	48889	47769	48218	64877	63270	65064	64026	64290		1015	625	681	657	701	683	981	1020	1048	982	1071	2165	2028	2070	2080	2279	3182	3208	3413	3337	3260	4444	4311
1016	9641	9047	9796	10193	9852	15747	16485	15416	15529	16034	31907	31812	33354	32491	32048	48532	48106	49059	47955	48391	65122	63515	65281	64235	64567		1016	626	681	660	701	686	984	1021	1049	983	1072	2174	2032	2072	2082	2286	3185	3217	3421	3342	3263	4452	4310
1017	9675	9073	9831	10226	9892	15812	16556	15476	15599	16091	32025	31918	33479	32624	32193	48720	48275	49238	48145	48573	65385	63733	65544	64478	64812		1017	626	683	665	701	687	986	1022	1051	985	1073	2185	2036	2080	2083	2292	3188	3230	3424	3345	3265	4453	4312
1018	9706	9099	9877	10263	9921	15866	16613	15547	15661	16151	32143	32015	33596	32752	32331	48894	48467	49421	48327	48763	65635	63976	65768	64701	65041		1018	627	683	665	701	688	987	1022	1051	986	1075	2189	2038	2083	2091	2293	3189	3239	3436	3349	3268	4458	4321
1019	9744	9138	9916	10304	9951	15921	16679	15606	15717	16200	32270	32139	33729	32864	32455	49066	48621	49607	48495	48923	65886	64208	66001	64911	65314		1019	628	684	665	701	690	987	1022	1051	989	1078	2193	2042	2085	2090	2296	3197	3241	3444	3355	3272	4463	4320
1020	9781	9172	9949	10336	9985	15985	16748	15643	15773	16270	32377	32256	33857	32997	32548	49236	48786	49803	48690	49110	66130	64439	66229	65174	65543		1020	629	685	667	703	690	987	1024	1054	989	1080	2195	2044	2090	2097	2297	3204	3246	3450	3357	3278	4474	4330
1021	9813	9201	9990	10371	10036	16049	16801	15707	15830	16320	32490	32391	33994	33109	32672	49411	48969	49974	48867	49305	66359	64712	66503	65432	65778		1021	629	685	667	705	689	989	1024	1054	993	1081	2198	2055	2096	2105	2300	3206	3247	3454	3361	3280	4480	4336
1022	9841	9229	10022	10408	10076	16108	16868	15768	15874	16372	32602	32534	34122	33214	32788	49575	49159	50161	49020	49475	66627	64975	66760	65689	66039		1022	629	686	668	709	689	990	1024	1059	993	1084	2201	2058	2104	2109	2302	3210	3250	3458	3366	3282	4489	4339
1023	9880	9262	10065	10449	10111	16172	16929	15822	15924	16433	32722	32639	34253	33308	32903	49790	49347	50342	49235	49649	66846	65220	66991	65933	66279		1023	632	686	672	711	693	991	1025	1060	994	1083	2203	2065	2106	2110	2306	3217	3262	3470	3373	3286	4499	4347
1024	9917	9299	10101	10492	10154	16218	16995	15882	15977	16486	32838	32787	34400	33432	33006	49967	49513	50530	49419	49842	67086	65471	67238	66196	66540		1024	631	686	673	712	693	994	1024	1063	997	1087	2206	2065	2109	2110	2311	3219	3265	3478	3376	3288	4508	4357
1025	9954	9338	10140	10527	10204	16277	17054	15940	16035	16547	32950	32920	34520	33569	33142	50144	49714	50704	49584	50012	67318	65714	67473	66439	66762		1025	631	685	675	714	693	993	1025	1066	998	1087	2209	2070	2111	2115	2314	3225	3265	3491	3383	3295	4512	4363
1026	9993	9367	10179	10567	10240	16349	17116	16012	16084	16616	33070	33042	34633	33701	33258	50318	49891	50876	49760	50230	67592	65958	67713	66698	67024		1026	633	685	677	714	692	995	1027	1067	998	1088	2209	2079	2113	2116	2320	3230	3270	3499	3395	3299	4511	4375
1027	10026	9401	10211	10601	10290	16409	17182	16060	16147	16682	33184	33155	34746	33848	33378	50495	50081	51052	49945	50400	67842	66197	67935	66946	67302		1027	635	686	677	714	701	996	1030	1069	1000	1098	2215	2082	2117	2120	2327	3234	3278	3502	3408	3303	4521	4381
1028	10074	9434	10245	10648	10320	16465	17254	16113	16209	16745	33337	33278	34870	33956	33519	50655	50254	51243	50136	50568	68095	66438	68195	67202	67563		1028	636	686	681	716	702	999	1034	1071	1005	1100	2222	2089	2120	2125	2333	3247	3295	3508	3411	3308	4530	4394
1029	10107	9475	10286	10682	10365	16530	17309	16172	16272	16796	33477	33413	34988	34083	33646	50841	50460	51443	50312	50771	68332	66675	68447	67436	67842		1029	637	689	683	718	706	1001	1035	1072	1005	1102	2226	2091	2121	2129	2339	3255	3306	3517	3419	3311	4531	4402
1030	10145	9508	10326	10717	10409	16608	17364	16222	16340	16857	33586	33536	35132	34229	33790	51038	50634	51624	50518	50941	68610	66926	68710	67698	68124		1030	638	694	684	719	709	1003	1037	1073	1006	1103	2233	2093	2126	2139	2345	3259	3311	3525	3425	3313	4542	4413
1031	10189	9544	10361	10754	10448	16661	17425	16279	16402	16923	33710	33662	35295	34341	33941	51218	50829	51792	50704	51152	68872	67192	68983	67957	68358		1031	639	695	684	720	709	1005	1039	1076	1006	1104	2235	2104	2131	2146	2348	3264	3320	3527	3438	3317	4549	4418
1032	10230	9585	10394	10805	10492	16711	17490	16330	16480	16993	33829	33798	35422	34479	34065	51416	51038	51981	50875	51338	69113	67417	69248	68214	68630		1032	641	696	687	720	711	1006	1044	1077	1013	1105	2245	2113	2134	2146	2357	3266	3323	3532	3441	3317	4553	4428
1033	10276	9630	10424	10857	10526	16771	17545	16398	16542	17060	33967	33903	35546	34611	34202	51616	51207	52188	51045	51529	69387	67663	69486	68435	68897		1033	642	697	687	723	711	1007	1046	1077	1013	1109	2250	2119	2137	2150	2362	3274	3324	3536	3446	3320	4555	4433
1034	10313	9669	10473	10903	10568	16829	17629	16462	16617	17115	34087	34045	35676	34738	34316	51795	51398	52414	51246	51702	69670	67873	69732	68706	69154		1034	645	698	689	724	713	1012	1050	1081	1013	1111	2255	2121	2142	2157	2363	3277	3328	3556	3454	3334	4562	4445
1035	10350	9696	10512	10946	10606	16887	17705	16533	16673	17167	34218	34152	35795	34874	34451	51971	51599	52595	51414	51884	69957	68161	69996	68988	69416		1035	644	699	689	724	713	1012	1050	1083	1015	1111	2265	2119	2148	2161	2364	3279	3331	3566	3465	3340	4565	4447
1036	10386	9721	10554	10991	10643	16949	17759	16596	16737	17218	34336	34265	35912	34970	34578	52142	51785	52826	51627	52077	70211	68432	70272	69236	69657		1036	646	703	689	725	712	1012	1051	1085	1015	1113	2263	2126	2153	2163	2367	3284	3340	3575	3470	3350	4572	4449
1037	10431	9749	10574	11034	10687	17019	17828	16659	16809	17279	34469	34419	36053	35099	34719	52334	51976	53036	51839	52300	70460	68696	70524	69478	69900		1037	646	707	689	725	715	1014	1057	1088	1014	1115	2266	2128	2160	2166	2375	3286	3341	3577	3477	3363	4580	4454
1038	10481	9785	10623	11077	10727	17083	17895	16706	16866	17338	34591	34545	36164	35227	34844	52517	52175	53254	52057	52507	70738	68958	70762	69734	70154		1038	650	712	691	728	715	1013	1058	1090	1015	1118	2270	2136	2162	2169	2382	3287	3348	3581	3478	3375	4597	4471
1039	10515	9819	10673	11108	10766	17153	17953	16781	16925	17413	34704	34662	36292	35362	34984	52735	52358	53456	52265	52707	70994	69182	71033	69997	70414		1039	654	712	691	728	715	1017	1060	1092	1015	1122	2275	2137	2164	2174	2383	3298	3360	3586	3486	3380	4604	4482
1040	10555	9854	10710	11140	10797	17209	18024	16847	16990	17485	34838	34790	36424	35488	35091	52926	52563	53661	52453	52949	71248	69442	71333	70245	70650		1040	655	716	692	728	716	1022	1059	1095	1016	1120	2278	2137	2165	2180	2387	3302	3365	3597	3491	3386	4613	4495
1041	10592	9882	10746	11166	10833	17281	18096	16916	17051	17539	34965	34923	36588	35634	35233	53117	52750	53905	52637	53151	71492	69697	71614	70490	70911		1041	655	716	692	729	719	1027	1061	1101	1017	1123	2280	2137	2165	2182	2392	3308	3371	3607	3491	3393	4622	4514
1042	10627	9911	10796	11208	10882	17341	18149	16977	17130	17604	35079	35047	36695	35758	35355	53310	52958	54080	52842	53365	71776	69974	71867	70771	71143		1042	654	723	691	729	723	1027	1062	1102	1024	1125	2289	2140	2165	2184	2395	3311	3378	3611	3504	3404	4635	4521
1043	10677	9942	10841	11248	10936	17399	18203	17041	17198	17672	35214	35179	36840	35903	35487	53524	53164	54285	53056	53571	72018	70250	72131	71044	71388		1043	655	723	696	731	722	1028	1062	1103	1026	1127	2294	2140	2168	2190	2398	3314	3386	3613	3514	3413	4640	4525
1044	10714	9972	10874	11298	10982	17466	18256	17112	17284	17739	35355	35294	36973	36030	35598	53738	53350	54478	53265	53747	72293	70533	72393	71304	71643		1044	659	724	696	732	723	1029	1064	1104	1026	1127	2299	2148	2172	2190	2399	3316	3388	3617	3515	3427	4649	4533
1045	10759	10011	10913	11340	11015	17531	18328	17170	17359	17792	35473	35423	37097	36166	35718	53944	53540	54680	53467	53915	72530	70809	72667	71571	71922		1045	660	725	696	738	726	1030	1064	1107	1029	1126	2303	2152	2173	2193	2401	3321	3392	3618	3518	3437	4660	4538
1046	10803	10055	10951	11386	11060	17597	18409	17243	17417	17844	35605	35527	37243	36305	35873	54142	53746	54909	53658	54115	72794	71106	72933	71820	72206		1046	663	725	697	741	728	1029	1064	1107	1030	1134	2310	2152	2177	2198	2407	3328	3400	3624	3522	3442	4671	4546
1047	10846	10084	10989	11423	11108	17647	18479	17313	17476	17906	35754	35657	37394	36430	36017	54370	53955	55144	53856	54329	73060	71384	73202	72066	72491		1047	663	727	698	742	730	1031	1064	1110	1031	1136	2313	2160	2182	2198	2410	3331	3403	3628	3526	3450	4679	4551
1048	10886	10117	11022	11468	11149	17735	18535	17365	17548	17973	35910	35807	37543	36557	36145	54589	54147	55317	54086	54539	73331	71652	73480	72303	72740		1048	666	728	697	745	730	1031	1066	1110	1031	1140	2314	2168	2190	2202	2414	3336	3418	3634	3534	3459	4691	4557
1049	10938	10144	11068	11522	11201	17801	18593	17447	17612	18053	36041	35957	37687	36694	36301	54789	54334	55531	54293	54730	73591	71887	73764	72580	73002		1049	669	728	697	745	730	1032	1066	1114	1032	1143	2318	2169	2198	2207	2415	3340	3428	3646	3542	3465	4696	4571
1050	10970	10190	11107	11556	11246	17869	18658	17517	17676	18108	36169	36080	37825	36827	36429	54994	54512	55736	54480	54921	73851	72182	74025	72869	73270		1050	669	729	698	747	734	1034	1070	1116	1039	1151	2322	2173	2203	2215	2419	3345	3433	3653	3543	3471	4706	4578
1051	11008	10220	11149	11592	11290	17936	18725	17577	17742	18173	36291	36209	37987	36999	36553	55194	54707	55942	54679	55113	74094	72470	74324	73184	73553		1051	669	733	698	747	735	1038	1072	1118	1041	1155	2330	2175	2208	2221	2424	3348	3442	3655	3546	3474	4714	4582
1052	11045	10258	11188	11641	11324	17993	18791	17653	17813	18236	36406	36328	38115	37121	36681	55394	54914	56148	54873	55309	74388	72735	74623	73446	73822		1052	671	733	702	747	736	1042	1073	1119	1041	1154	2333	2179	2212	2225	2427	3353	3446	3664	3547	3478	4727	4588
1053	11096	10302	11230	11682	11368	18071	18852	17714	17880	18306	36539	36471	38253	37270	36843	55592	55112	56367	55082	55511	74693	73004	74906	73734	74117		1053	672	733	702	751	741	1043	1077	1127	1042	1155	2345	2182	2213	2235	2433	3359	3450	3666	3556	3483	4737	4598
1054	11140	10341	11272	11728	11412	18135	18920	17789	17940	18362	36673	36610	38414	37386	36975	55834	55319	56557	55273	55705	74971	73297	75175	74017	74402		1054	674	733	702	753	743	1046	1078	1127	1042	1157	2353	2187	2220	2235	2437	3366	3451	3669	3562	3494	4743	4604
1055	11175	10376	11316	11773	11454	18213	18988	17852	17999	18428	36802	36742	38558	37537	37124	56023	55545	56746	55483	55916	75272	73570	75435	74272	74675		1055	674	735	704	753	744	1046	1078	1128	1042	1156	2359	2189	2222	2240	2443	3373	3455	3677	3566	3500	4749	4615
1056	11217	10423	11352	11808	11497	18297	19053	17924	18063	18504	36937	36883	38700	37673	37268	56247	55746	56952	55692	56143	75540	73849	75715	74557	74949		1056	675	735	704	755	745	1046	1078	1129	1044	1161	2359	2196	2224	2245	2449	3383	3460	3693	3574	3511	4760	4628
1057	11269	10459	11387	11857	11549	18380	19123	17981	18126	18570	37084	37008	38837	37812	37424	56432	55943	57162	55890	56354	75848	74134	76024	74845	75210		1057	676	735	705	758	745	1048	1078	1130	1049	1166	2361	2196	2233	2251	2454	3382	3468	3702	3590	3523	4765	4634
1058	11318	10510	11425	11895	11590	18448	19194	18045	18204	18635	37237	37148	39003	37938	37549	56616	56149	57398	56111	56555	76092	74430	76289	75123	75486		1058	680	735	705	758	754	1053	1081	1132	1050	1169	2362	2199	2234	2252	2460	3389	3477	3717	3596	3532	4765	4647
1059	11383	10544	11479	11940	11624	18510	19279	18105	18267	18687	37373	37288	39139	38070	37693	56828	56328	57617	56330	56793	76346	74704	76552	75417	75731		1059	680	735	705	760	754	1054	1081	1130	1051	1169	2364	2202	2243	2257	2463	3394	3491	3722	3603	3537	4775	4651
1060	11440	10580	11523	11985	11659	18574	19343	18176	18338	18765	37516	37426	39274	38214	37842	57060	56530	57837	56479	56982	76625	75010	76813	75687	76015		1060	680	735	706	760	756	1056	1086	1134	1057	1172	2368	2205	2244	2257	2474	3402	3504	3731	3608	3538	4787	4659
1061	11478	10618	11564	12015	11701	18641	19410	18248	18412	18832	37633	37554	39423	38335	37986	57280	56753	58062	56699	57206	76922	75278	77096	75960	76296		1061	680	738	708	762	758	1057	1086	1137	1061	1176	2369	2214	2248	2260	2483	3407	3506	3735	3614	3541	4789	4663
1062	11528	10665	11613	12057	11743	18698	19492	18311	18481	18899	37778	37689	39554	38476	38124	57475	56960	58259	56901	57429	77175	75553	77382	76239	76589		1062	682	738	709	762	758	1059	1086	1140	1061	1177	2373	2212	2254	2265	2492	3409	3515	3748	3627	3545	4797	4678
1063	11563	10710	11669	12103	11783	18760	19563	18374	18555	18965	37930	37837	39714	38601	38275	57659	57191	58460	57118	57637	77478	75838	77680	76537	76890		1063	683	737	716	766	758	1061	1086	1142	1061	1181	2382	2216	2255	2266	2497	3419	3522	3755	3637	3553	4811	4685
1064	11603	10755	11713	12150	11829	18836	19629	18446	18640	19037	38049	37973	39851	38760	38433	57905	57406	58664	57327	57841	77749	76124	77963	76817	77166		1064	685	737	720	767	761	1063	1089	1143	1062	1184	2389	2219	2259	2271	2499	3420	3529	3759	3642	3556	4814	4704
1065	11647	10795	11744	12201	11875	18900	19688	18517	18709	19102	38191	38110	40008	38902	38581	58117	57636	58880	57545	58059	78020	76372	78254	77111	77472		1065	686	740	720	769	761	1063	1092	1143	1062	1185	2390	2224	2267	2278	2506	3424	3532	3771	3651	3556	4826	4711
1066	11695	10832	11792	12251	11908	18977	19757	18593	18779	19180	38330	38255	40160	39045	38737	58346	57839	59106	57752	58306	78308	76696	78558	77400	77737		1066	687	742	720	769	761	1064	1096	1147	1062	1186	2392	2233	2272	2284	2515	3430	3537	3776	3658	3561	4831	4718
1067	11734	10894	11838	12286	11953	19048	19841	18671	18860	19258	38469	38407	40296	39203	38891	58564	58052	59329	57924	58531	78585	76946	78859	77681	78014		1067	688	742	720	771	761	1064	1100	1150	1064	1187	2400	2233	2277	2286	2519	3435	3548	3778	3669	3568	4837	4725
1068	11774	10929	11882	12329	12003	19111	19923	18739	18934	19324	38631	38536	40419	39340	39045	58789	58268	59557	58159	58760	78882	77244	79144	77939	78294		1068	688	744	725	774	760	1064	1101	1150	1065	1187	2400	2236	2288	2292	2523	3439	3554	3776	3681	3573	4843	4725
1069	11823	10958	11930	12378	12044	19191	20011	18805	19025	19396	38753	38675	40568	39496	39199	58979	58464	59770	58375	58986	79196	77521	79462	78224	78580		1069	688	744	725	774	759	1066	1104	1151	1065	1193	2403	2238	2294	2292	2524	3450	3571	3791	3688	3583	4850	4744
1070	11865	10994	11980	12419	12087	19268	20092	18888	19088	19461	38896	38826	40722	39656	39345	59209	58692	59977	58566	59204	79449	77796	79761	78552	78870		1070	692	745	725	773	761	1066	1104	1153	1072	1194	2404	2243	2303	2296	2529	3454	3572	3796	3693	3589	4862	4749
1071	11916	11029	12029	12472	12134	19333	20154	18968	19163	19531	39043	38968	40877	39785	39470	59422	58908	60191	58775	59432	79721	78059	80058	78842	79189		1071	693	746	729	773	761	1066	1108	1156	1073	1195	2406	2245	2308	2302	2536	3458	3578	3814	3699	3600	4863	4755
1072	11949	11065	12065	12537	12181	19419	20235	19043	19239	19601	39204	39114	41014	39943	39587	59658	59121	60441	58988	59646	80034	78365	80348	79141	79490		1072	693	748	730	776	765	1066	1109	1159	1074	1196	2414	2247	2316	2304	2542	3467	3585	3817	3704	3612	4877	4769
1073	11987	11115	12113	12592	12222	19489	20303	19120	19312	19686	39346	39290	41169	40086	39760	59862	59350	60651	59216	59892	80351	78667	80632	79426	79816		1073	693	751	732	776	765	1067	1110	1161	1075	1196	2418	2257	2316	2305	2548	3475	3600	3825	3706	3620	4895	4776
1074	12036	11164	12157	12643	12264	19579	20361	19188	19377	19750	39498	39436	41336	40231	39884	60080	59575	60880	59426	60139	80651	78922	80969	79734	80082		1074	695	752	735	776	767	1068	1110	1164	1077	1201	2425	2258	2323	2306	2559	3481	3612	3827	3713	3630	4903	4788
1075	12088	11213	12197	12682	12316	19646	20430	19265	19460	19799	39652	39613	41489	40383	40025	60292	59774	61146	59640	60378	80950	79171	81272	80021	80382		1075	694	753	735	777	769	1068	1111	1170	1077	1201	2433	2261	2323	2311	2568	3485	3613	3834	3716	3634	4908	4804
1076	12148	11243	12241	12746	12357	19722	20490	19343	19525	19868	39787	39765	41627	40520	40170	60522	59997	61397	59860	60594	81261	79450	81579	80330	80674		1076	694	754	735	777	769	1069	1113	1174	1081	1203	2436	2265	2325	2314	2575	3492	3617	3839	3719	3635	4919	4826
1077	12189	11294	12281	12805	12406	19797	20549	19411	19599	19948	39945	39914	41792	40694	40312	60736	60238	61642	60088	60842	81602	79736	81888	80625	80986		1077	695	755	736	777	770	1069	1119	1175	1081	1211	2442	2264	2325	2322	2580	3499	3633	3845	3724	3645	4932	4838
1078	12239	11333	12327	12869	12441	19866	20615	19491	19666	20018	40114	40039	41937	40833	40478	60948	60461	61864	60296	61060	81896	80000	82155	80932	81309		1078	696	755	739	779	770	1074	1123	1177	1083	1217	2445	2265	2331	2326	2593	3508	3648	3854	3726	3653	4940	4844
1079	12284	11373	12371	12926	12478	19948	20692	19565	19732	20087	40297	40180	42115	40998	40621	61177	60667	62098	60517	61281	82199	80281	82434	81210	81626		1079	699	755	741	779	778	1074	1124	1181	1086	1218	2454	2273	2335	2329	2597	3510	3652	3860	3732	3662	4949	4852
1080	12321	11423	12424	12980	12516	20024	20789	19658	19799	20163	40448	40307	42253	41124	40765	61411	60879	62327	60718	61493	82486	80598	82726	81480	81909		1080	700	755	740	783	781	1075	1124	1185	1087	1219	2462	2277	2335	2332	2598	3519	3669	3866	3733	3661	4950	4854
1081	12356	11463	12471	13032	12567	20088	20868	19715	19875	20240	40609	40459	42411	41257	40923	61653	61134	62553	60967	61706	82782	80875	83038	81784	82191		1081	701	758	744	784	781	1079	1126	1187	1091	1221	2470	2283	2353	2341	2605	3525	3680	3871	3736	3668	4959	4868
1082	12409	11511	12522	13082	12608	20167	20949	19797	19941	20309	40761	40604	42559	41401	41082	61882	61362	62799	61181	61930	83084	81164	83332	82112	82453		1082	702	758	746	785	783	1079	1130	1198	1092	1224	2477	2285	2353	2342	2611	3528	3686	3871	3744	3684	4967	4873
1083	12452	11567	12560	13128	12665	20247	21014	19874	20021	20384	40929	40757	42729	41560	41223	62092	61601	63023	61433	62140	83385	81442	83620	82435	82735		1083	705	761	750	788	783	1079	1131	1199	1097	1224	2480	2291	2353	2343	2614	3536	3694	3886	3746	3699	4976	4877
1084	12497	11603	12618	13181	12711	20328	21103	19949	20079	20451	41102	40920	42890	41717	41365	62319	61837	63251	61662	62365	83687	81724	83931	82775	83031		1084	709	764	750	788	783	1080	1132	1202	1098	1228	2491	2297	2362	2354	2620	3546	3698	3894	3750	3702	4995	4888
1085	12555	11652	12674	13215	12758	20411	21192	20008	20144	20516	41279	41070	43056	41871	41523	62558	62063	63473	61882	62556	83997	82026	84212	83060	83322		1085	709	766	752	793	787	1083	1135	1203	1098	1235	2499	2304	2367	2358	2629	3555	3701	3896	3752	3713	5008	4897
1086	12604	11693	12732	13259	12808	20483	21270	20076	20228	20618	41412	41203	43225	42025	41673	62783	62305	63694	62118	62782	84308	82339	84514	83384	83630		1086	709	772	754	793	789	1086	1135	1204	1098	1239	2503	2305	2371	2362	2634	3560	3713	3896	3759	3719	5016	4902
1087	12647	11743	12797	13310	12854	20573	21360	20160	20303	20689	41555	41360	43376	42171	41825	63025	62551	63971	62371	63008	84627	82663	84848	83679	83908		1087	709	773	753	793	792	1087	1135	1209	1099	1239	2505	2306	2378	2363	2637	3564	3718	3904	3769	3728	5026	4904
1088	12683	11782	12847	13376	12904	20634	21435	20222	20370	20753	41713	41509	43543	42329	41976	63292	62774	64166	62578	63247	84938	82963	85145	83985	84229		1088	711	773	752	798	795	1090	1138	1212	1101	1249	2506	2310	2381	2370	2637	3572	3722	3911	3784	3747	5038	4912
1089	12731	11814	12913	13428	12953	20719	21525	20278	20454	20848	41852	41643	43696	42519	42133	63486	63018	64399	62816	63490	85285	83287	85444	84301	84565		1089	718	775	755	798	795	1090	1139	1215	1102	1249	2511	2313	2387	2375	2639	3575	3722	3931	3787	3755	5049	4919
1090	12794	11857	12964	13476	12991	20795	21598	20343	20548	20927	42021	41777	43882	42680	42274	63724	63237	64646	63039	63725	85607	83621	85783	84592	84894		1090	718	775	756	799	796	1092	1140	1216	1102	1248	2513	2315	2391	2380	2643	3581	3726	3932	3797	3761	5057	4933
1091	12841	11906	13007	13520	13042	20876	21678	20417	20624	20997	42192	41906	44040	42813	42445	63948	63475	64867	63268	63944	85931	83944	86114	84931	85220		1091	720	774	757	804	798	1092	1142	1216	1104	1251	2518	2326	2394	2385	2648	3589	3728	3942	3800	3765	5064	4941
1092	12886	11941	13056	13582	13080	20940	21754	20504	20690	21085	42370	42076	44201	42973	42620	64204	63689	65087	63501	64160	86264	84300	86432	85241	85527		1092	721	774	759	806	800	1092	1144	1217	1108	1252	2518	2329	2394	2389	2652	3596	3737	3951	3809	3773	5073	4952
1093	12936	11985	13110	13636	13124	21011	21848	20599	20745	21169	42522	42223	44360	43118	42749	64453	63936	65339	63753	64406	86601	84606	86744	85563	85883		1093	721	778	759	809	809	1093	1146	1217	1110	1254	2519	2336	2393	2392	2660	3609	3748	3959	3813	3777	5085	4963
1094	12977	12040	13162	13690	13177	21075	21932	20668	20827	21233	42665	42394	44517	43260	42912	64714	64187	65580	63975	64636	86931	84918	87048	85864	86207		1094	721	778	765	809	809	1095	1146	1218	1111	1258	2520	2336	2401	2394	2667	3612	3749	3963	3817	3780	5092	4969
1095	13025	12083	13220	13746	13232	21144	22002	20747	20923	21309	42815	42540	44704	43437	43075	64976	64417	65824	64228	64865	87221	85235	87389	86193	86536		1095	720	777	765	810	809	1101	1152	1217	1113	1261	2522	2339	2405	2397	2678	3618	3755	3971	3819	3783	5103	4975
1096	13084	12118	13273	13786	13276	21230	22076	20809	20997	21388	42991	42704	44887	43585	43233	65214	64670	66066	64462	65126	87528	85540	87703	86524	86865		1096	721	779	765	815	809	1104	1153	1222	1115	1261	2524	2346	2409	2398	2683	3626	3763	3985	3821	3784	5104	4976
1097	13134	12165	13318	13826	13328	21311	22161	20899	21063	21458	43153	42872	45066	43752	43384	65427	64912	66278	64701	65367	87854	85884	88025	86862	87206		1097	724	780	765	816	811	1104	1156	1226	1116	1262	2526	2347	2418	2399	2689	3634	3764	3995	3836	3786	5116	4988
1098	13176	12227	13359	13871	13371	21371	22257	20974	21133	21553	43324	43043	45217	43919	43574	65652	65149	66516	64953	65617	88180	86176	88334	87192	87512		1098	725	782	769	819	812	1105	1159	1228	1117	1262	2535	2354	2424	2400	2696	3638	3769	4001	3842	3795	5123	4998
1099	13236	12269	13407	13928	13417	21449	22334	21054	21220	21639	43474	43192	45394	44073	43736	65908	65364	66774	65190	65867	88500	86480	88647	87503	87833		1099	727	783	770	823	812	1107	1164	1228	1117	1261	2541	2355	2428	2402	2698	3641	3777	4005	3845	3797	5129	5007
1100	13286	12313	13461	13986	13461	21532	22427	21127	21314	21709	43640	43356	45555	44222	43896	66154	65607	67008	65422	66120	88843	86782	88956	87805	88154		1100	727	784	771	828	812	1111	1168	1232	1118	1263	2546	2355	2431	2412	2700	3645	3781	4011	3858	3802	5140	5009
1101	13322	12354	13511	14040	13508	21624	22505	21199	21396	21791	43803	43502	45736	44381	44052	66383	65842	67236	65668	66372	89197	87089	89266	88141	88479		1101	726	784	772	828	814	1114	1170	1234	1123	1263	2558	2363	2435	2418	2708	3652	3782	4017	3871	3810	5152	5013
1102	13368	12396	13574	14091	13551	21708	22575	21260	21471	21883	43971	43677	45923	44544	44206	66614	66084	67465	65935	66600	89531	87408	89623	88480	88807		1102	727	785	775	828	817	1114	1179	1235	1124	1266	2562	2367	2435	2424	2708	3657	3793	4026	3885	3816	5158	5017
1103	13415	12449	13631	14169	13598	21780	22664	21344	21566	21963	44120	43832	46129	44710	44374	66906	66336	67715	66171	66813	89855	87718	89961	88803	89135		1103	727	787	775	835	821	1119	1181	1237	1125	1265	2567	2378	2439	2429	2711	3663	3807	4035	3885	3821	5163	5025
1104	13469	12500	13673	14231	13648	21860	22745	21425	21639	22036	44289	43974	46294	44884	44532	67156	66588	67963	66424	67050	90191	88064	90294	89137	89463		1104	728	788	778	835	820	1119	1183	1238	1125	1264	2572	2381	2438	2432	2714	3666	3813	4039	3894	3831	5172	5039
1105	13530	12557	13714	14284	13695	21941	22843	21509	21720	22115	44461	44121	46489	45060	44707	67407	66844	68205	66693	67285	90509	88408	90644	89480	89814		1105	728	789	779	835	824	1119	1184	1241	1131	1266	2580	2385	2439	2437	2719	3668	3815	4048	3903	3840	5188	5044
1106	13582	12607	13767	14338	13748	22014	22945	21583	21796	22209	44639	44292	46673	45224	44861	67671	67092	68446	66934	67545	90851	88710	90975	89856	90164		1106	729	790	781	835	823	1121	1186	1241	1131	1266	2589	2387	2439	2442	2723	3676	3818	4052	3910	3843	5193	5052
1107	13636	12653	13806	14403	13805	22107	23048	21660	21860	22297	44818	44464	46845	45387	45007	67935	67331	68698	67159	67799	91202	89018	91324	90166	90483		1107	732	796	781	838	823	1127	1187	1244	1132	1269	2590	2390	2448	2444	2724	3685	3823	4061	3917	3847	5202	5065
1108	13678	12695	13853	14454	13862	22210	23146	21737	21954	22373	44966	44628	47005	45567	45154	68170	67574	68958	67426	68038	91572	89361	91645	90469	90844		1108	732	796	783	841	822	1128	1189	1247	1132	1274	2595	2391	2451	2447	2733	3693	3833	4063	3922	3857	5214	5072
1109	13722	12738	13906	14505	13912	22294	23227	21828	22023	22460	45132	44795	47184	45757	45324	68428	67839	69203	67642	68279	91874	89701	91963	90805	91192		1109	732	795	783	842	825	1132	1192	1246	1132	1279	2607	2399	2454	2450	2743	3697	3841	4070	3931	3863	5226	5072
1110	13766	12784	13967	14552	13966	22378	23303	21905	22114	22535	45294	44976	47361	45955	45513	68682	68091	69454	67866	68526	92214	90021	92330	91177	91537		1110	732	799	786	843	826	1132	1192	1248	1133	1281	2609	2403	2456	2455	2750	3706	3847	4083	3934	3870	5234	5085
1111	13814	12829	14014	14606	14020	22468	23391	21985	22206	22613	45449	45149	47550	46127	45650	68945	68344	69690	68111	68771	92530	90349	92674	91498	91863		1111	733	802	789	844	828	1133	1195	1249	1136	1282	2615	2413	2458	2462	2754	3713	3853	4085	3941	3874	5245	5099
1112	13872	12877	14050	14652	14087	22550	23493	22067	22285	22699	45614	45287	47730	46320	45812	69212	68597	69942	68384	69038	92875	90704	92981	91810	92221		1112	736	803	789	844	833	1135	1204	1254	1137	1286	2619	2417	2464	2467	2757	3717	3855	4089	3947	3877	5253	5106
1113	13924	12924	14112	14718	14128	22636	23573	22144	22365	22789	45788	45450	47889	46465	45977	69488	68859	70188	68633	69297	93229	91017	93322	92172	92591		1113	737	804	790	846	834	1138	1207	1255	1139	1290	2621	2423	2469	2469	2765	3721	3872	4094	3959	3878	5262	5114
1114	13969	12974	14172	14767	14166	22730	23653	22226	22436	22882	45950	45606	48076	46625	46133	69760	69100	70438	68899	69556	93597	91384	93713	92545	92958		1114	738	806	792	846	833	1141	1206	1255	1140	1291	2626	2425	2475	2472	2768	3725	3880	4102	3965	3892	5269	5119
1115	14001	13033	14223	14821	14219	22804	23742	22291	22505	22984	46130	45761	48239	46801	46299	70023	69338	70703	69135	69791	93955	91730	94105	92904	93295		1115	740	807	793	846	832	1142	1208	1259	1141	1293	2635	2426	2477	2479	2772	3739	3880	4110	3969	3896	5277	5131
1116	14055	13078	14274	14878	14276	22883	23825	22393	22589	23082	46278	45953	48409	46983	46482	70267	69598	70947	69391	70086	94319	92076	94462	93265	93658		1116	743	807	798	850	832	1150	1211	1261	1144	1295	2643	2427	2479	2485	2775	3743	3890	4122	3978	3902	5292	5135
1117	14103	13117	14304	14941	14336	22972	23922	22476	22668	23156	46477	46119	48596	47181	46643	70532	69861	71213	69645	70378	94663	92388	94799	93606	94040		1117	744	808	798	851	833	1152	1216	1263	1146	1303	2648	2432	2484	2486	2783	3747	3899	4126	3981	3907	5298	5149
1118	14153	13172	14364	14997	14390	23057	24020	22558	22753	23233	46649	46303	48797	47383	46819	70806	70096	71485	69914	70630	95010	92762	95154	93953	94387		1118	744	813	807	853	835	1155	1216	1266	1149	1304	2651	2441	2488	2489	2785	3755	3909	4145	3994	3914	5313	5156
1119	14199	13221	14418	15042	14445	23153	24110	22633	22832	23312	46838	46458	48982	47556	47000	71059	70373	71759	70158	70903	95339	93130	95513	94309	94741		1119	746	814	809	856	838	1156	1218	1269	1152	1306	2657	2446	2497	2494	2789	3764	3920	4152	4007	3920	5325	5169
1120	14243	13282	14469	15096	14504	23249	24181	22714	22916	23398	46998	46625	49176	47750	47182	71307	70615	72056	70425	71190	95719	93494	95896	94643	95078		1120	745	817	812	857	837	1158	1220	1275	1157	1310	2658	2449	2503	2503	2792	3764	3929	4162	4015	3928	5336	5179
1121	14292	13340	14518	15150	14559	23328	24269	22797	23005	23495	47172	46780	49346	47957	47360	71585	70851	72323	70699	71471	96077	93842	96221	94992	95404		1121	745	821	813	857	837	1161	1221	1277	1160	1314	2659	2454	2505	2508	2800	3770	3937	4169	4023	3938	5344	5185
1122	14345	13389	14563	15207	14605	23415	24354	22882	23098	23596	47348	46960	49523	48099	47517	71831	71133	72578	70972	71716	96425	94209	96596	95342	95758		1122	746	821	815	859	839	1162	1225	1281	1162	1316	2667	2459	2516	2511	2810	3774	3948	4172	4026	3953	5356	5195
1123	14398	13446	14609	15270	14654	23496	24437	22961	23172	23695	47541	47149	49715	48269	47701	72122	71380	72874	71253	71988	96778	94557	96943	95706	96120		1123	746	820	817	867	846	1169	1226	1284	1163	1320	2669	2462	2523	2515	2816	3783	3954	4177	4029	3964	5369	5202
1124	14448	13493	14659	15319	14709	23585	24528	23049	23260	23792	47718	47301	49890	48454	47884	72387	71636	73122	71501	72248	97160	94946	97315	96072	96440		1124	749	827	819	866	847	1169	1229	1286	1167	1320	2672	2465	2525	2520	2820	3792	3964	4184	4040	3975	5386	5213
1125	14506	13564	14710	15396	14769	23689	24621	23127	23344	23908	47887	47465	50079	48620	48070	72670	71909	73420	71787	72536	97526	95329	97684	96431	96803		1125	749	827	821	868	847	1170	1233	1289	1168	1321	2672	2468	2529	2524	2826	3798	3968	4190	4052	3986	5400	5222
1126	14572	13620	14766	15461	14832	23782	24714	23197	23440	23994	48069	47655	50272	48798	48263	72922	72194	73689	72045	72801	97903	95652	98026	96775	97150		1126	752	829	821	870	849	1170	1234	1293	1169	1326	2672	2473	2532	2526	2827	3803	3970	4200	4060	3993	5407	5228
1127	14626	13679	14809	15513	14897	23883	24792	23272	23522	24078	48242	47851	50479	48972	48439	73184	72456	73933	72332	73091	98272	95999	98394	97120	97538		1127	753	829	821	876	852	1170	1236	1294	1169	1328	2676	2474	2536	2528	2840	3814	3978	4206	4064	3999	5413	5242
1128	14673	13737	14867	15570	14945	23959	24883	23344	23619	24174	48429	48039	50655	49180	48611	73510	72734	74226	72587	73361	98633	96367	98766	97477	97901		1128	757	834	823	879	856	1170	1236	1294	1172	1332	2676	2474	2540	2531	2845	3826	3982	4215	4069	4013	5419	5258
1129	14717	13793	14917	15619	15013	24035	24987	23446	23699	24264	48616	48223	50854	49365	48789	73776	72955	74496	72904	73627	98975	96761	99124	97822	98276		1129	757	836	823	885	858	1171	1241	1295	1173	1334	2677	2478	2551	2537	2850	3829	3985	4219	4077	4020	5429	5262
1130	14772	13832	14966	15661	15071	24115	25079	23517	23777	24375	48824	48407	51056	49553	48983	74064	73235	74763	73170	73870	99354	97091	99492	98204	98603		1130	760	839	824	893	858	1175	1242	1294	1180	1336	2681	2483	2560	2537	2856	3840	3990	4230	4086	4025	5443	5273
1131	14831	13877	15017	15718	15131	24200	25151	23588	23855	24470	48981	48593	51230	49734	49163	74332	73517	75041	73445	74133	99753	97440	99839	98540	98950		1131	765	839	824	896	858	1182	1243	1300	1185	1337	2683	2485	2566	2543	2866	3851	3994	4239	4095	4028	5461	5282
1132	14890	13930	15073	15773	15198	24295	25245	23663	23934	24579	49175	48752	51407	49911	49319	74618	73783	75306	73717	74422	100145	97795	100207	98915	99288		1132	765	838	826	899	857	1184	1243	1301	1190	1341	2691	2487	2580	2549	2870	3862	4000	4253	4109	4033	5471	5292
1133	14933	13975	15150	15825	15255	24392	25331	23753	24015	24673	49369	48967	51606	50092	49493	74877	74057	75603	73980	74724	100523	98125	100582	99264	99659		1133	765	841	827	899	861	1189	1244	1302	1190	1343	2693	2499	2587	2556	2872	3871	4008	4269	4113	4039	5484	5301
1134	14995	14031	15202	15866	15323	24469	25417	23845	24098	24775	49561	49141	51803	50273	49683	75154	74349	75876	74238	75015	100882	98452	100971	99663	100053		1134	767	844	828	901	861	1196	1250	1304	1193	1342	2696	2499	2590	2559	2874	3877	4013	4278	4118	4044	5505	5309
1135	15048	14091	15260	15925	15376	24558	25511	23939	24179	24849	49770	49325	52000	50467	49876	75446	74633	76163	74533	75298	101267	98820	101346	100001	100386		1135	770	846	831	905	863	1197	1251	1307	1193	1342	2701	2502	2593	2569	2881	3884	4020	4280	4125	4056	5513	5324
1136	15097	14150	15312	15973	15419	24653	25597	24027	24256	24950	49962	49514	52219	50652	50058	75739	74917	76434	74809	75576	101645	99205	101745	100404	100749		1136	770	848	832	909	863	1200	1253	1310	1192	1345	2705	2506	2595	2575	2889	3892	4025	4285	4133	4067	5527	5334
1137	15147	14212	15353	16031	15484	24735	25701	24123	24350	25020	50148	49715	52420	50844	50247	76003	75243	76689	75088	75839	102032	99577	102130	100779	101131		1137	773	853	833	910	865	1203	1263	1311	1192	1348	2713	2510	2596	2579	2893	3898	4032	4295	4137	4075	5533	5341
1138	15198	14263	15422	16081	15559	24835	25815	24234	24457	25124	50309	49897	52617	51009	50415	76273	75520	76967	75362	76140	102412	99931	102516	101142	101490		1138	772	854	836	912	866	1205	1265	1314	1194	1351	2719	2519	2594	2585	2904	3902	4033	4302	4140	4084	5545	5346
1139	15260	14310	15485	16145	15606	24934	25932	24325	24560	25210	50525	50087	52796	51221	50607	76569	75855	77290	75654	76419	102800	100341	102868	101537	101862		1139	773	854	837	913	866	1206	1265	1315	1196	1354	2727	2527	2599	2586	2907	3909	4041	4312	4147	4084	5556	5362
1140	15309	14362	15546	16210	15663	25034	26050	24400	24631	25295	50701	50287	52999	51415	50797	76839	76163	77595	75909	76693	103186	100700	103257	101900	102198		1140	776	855	836	917	875	1208	1266	1315	1201	1357	2730	2529	2601	2590	2917	3915	4050	4316	4154	4090	5570	5369
1141	15365	14403	15620	16257	15707	25123	26153	24496	24733	25395	50913	50478	53186	51590	50980	77098	76433	77898	76178	76970	103569	101072	103630	102268	102541		1141	776	854	841	918	875	1209	1269	1317	1203	1359	2734	2535	2601	2592	2922	3921	4055	4323	4162	4102	5579	5382
1142	15427	14454	15686	16331	15761	25244	26253	24583	24835	25482	51094	50665	53373	51790	51170	77381	76719	78208	76428	77271	103958	101450	104011	102651	102922		1142	777	854	845	918	877	1217	1273	1317	1206	1360	2737	2536	2606	2594	2927	3928	4059	4339	4166	4108	5595	5393
1143	15477	14514	15748	16395	15822	25335	26358	24661	24932	25583	51277	50834	53553	51968	51371	77682	77012	78506	76704	77552	104368	101804	104405	103071	103292		1143	778	855	847	921	877	1220	1274	1317	1211	1363	2740	2544	2609	2597	2932	3931	4064	4344	4170	4119	5603	5397
1144	15540	14573	15808	16438	15878	25414	26458	24749	25036	25674	51438	51042	53753	52157	51553	77974	77284	78813	76968	77837	104750	102199	104810	103444	103692		1144	779	855	846	922	879	1220	1274	1318	1211	1367	2746	2549	2611	2602	2943	3945	4076	4348	4173	4126	5612	5410
1145	15596	14616	15869	16492	15927	25498	26570	24834	25137	25768	51613	51237	53962	52346	51739	78275	77550	79142	77246	78105	105185	102574	105225	103817	104041		1145	780	859	849	926	879	1222	1275	1320	1213	1370	2753	2555	2617	2606	2944	3952	4080	4361	4178	4136	5618	5413
1146	15659	14663	15921	16550	15989	25589	26675	24937	25237	25864	51823	51437	54170	52545	51969	78572	77856	79453	77507	78376	105562	102982	105595	104211	104439		1146	782	859	853	930	883	1223	1278	1322	1215	1374	2763	2554	2627	2614	2951	3957	4092	4367	4186	4137	5629	5427
1147	15704	14707	15991	16609	16041	25672	26776	25041	25313	25956	52008	51639	54362	52746	52168	78872	78131	79759	77817	78649	105971	103354	105998	104578	104803		1147	782	862	855	929	888	1225	1279	1325	1214	1376	2765	2555	2628	2623	2953	3959	4106	4370	4199	4144	5648	5436
1148	15768	14755	16053	16674	16096	25751	26871	25139	25425	26048	52214	51816	54551	52936	52371	79197	78419	80081	78088	78924	106420	103734	106412	104958	105179		1148	783	864	855	928	888	1229	1279	1326	1214	1377	2770	2563	2629	2627	2959	3964	4107	4382	4207	4151	5658	5444
1149	15825	14805	16108	16732	16158	25851	26971	25224	25523	26135	52414	52005	54765	53118	52574	79478	78677	80403	78380	79216	106830	104120	106814	105326	105604		1149	784	865	859	928	889	1229	1282	1327	1220	1382	2778	2565	2634	2631	2960	3970	4121	4384	4223	4159	5666	5447
1150	15888	14859	16167	16802	16218	25949	27055	25334	25618	26236	52604	52209	54966	53317	52785	79765	78976	80673	78672	79524	107235	104531	107199	105749	106036		1150	782	868	863	930	891	1231	1283	1333	1220	1382	2787	2569	2643	2639	2962	3980	4128	4390	4232	4171	5679	5460
1151	15931	14924	16229	16879	16273	26032	27158	25420	25696	26341	52805	52398	55164	53501	52964	80062	79270	80979	78988	79842	107609	104941	107603	106132	106424		1151	785	868	869	933	892	1236	1285	1334	1221	1382	2792	2568	2643	2645	2970	3991	4128	4395	4239	4178	5685	5474
1152	15974	14990	16291	16939	16336	26127	27267	25514	25798	26439	52993	52588	55350	53708	53148	80369	79581	81284	79268	80183	107966	105367	107989	106532	106844		1152	784	871	872	938	891	1236	1289	1338	1221	1386	2796	2577	2647	2644	2973	3997	4132	4399	4244	4191	5699	5482
1153	16026	15042	16351	17012	16391	26237	27364	25614	25895	26535	53194	52768	55571	53923	53350	80671	79865	81577	79549	80484	108372	105783	108409	106903	107242		1153	786	872	874	937	893	1236	1292	1340	1219	1391	2798	2575	2654	2643	2975	4011	4146	4408	4259	4193	5708	5482
1154	16093	15117	16392	17073	16442	26341	27459	25702	25987	26641	53376	52975	55779	54148	53547	80975	80139	81896	79851	80801	108753	106169	108814	107263	107651		1154	786	873	875	937	894	1239	1292	1341	1223	1390	2805	2590	2664	2648	2980	4020	4151	4415	4279	4201	5723	5489
1155	16138	15172	16455	17137	16508	26436	27582	25786	26085	26731	53569	53155	55979	54327	53758	81247	80449	82191	80168	81096	109167	106531	109255	107656	108060		1155	787	873	879	942	896	1239	1293	1343	1224	1389	2811	2593	2668	2651	2984	4029	4160	4414	4290	4207	5739	5495
1156	16196	15226	16519	17190	16555	26522	27660	25882	26189	26830	53773	53375	56193	54496	53963	81537	80748	82498	80472	81402	109573	106919	109633	108071	108469		1156	787	877	879	942	896	1244	1293	1345	1227	1391	2815	2598	2674	2654	2992	4038	4162	4427	4309	4212	5756	5504
1157	16247	15273	16574	17255	16620	26623	27771	25978	26289	26935	53967	53581	56415	54677	54141	81821	81045	82837	80784	81709	109976	107280	110058	108465	108847		1157	787	877	880	944	897	1244	1296	1347	1229	1392	2814	2607	2683	2655	2996	4041	4174	4434	4315	4224	5766	5510
1158	16316	15338	16622	17309	16703	26719	27897	26055	26399	27041	54185	53769	56623	54883	54355	82114	81355	83150	81052	81977	110372	107657	110471	108855	109280		1158	789	877	879	948	901	1244	1301	1353	1231	1395	2814	2610	2691	2655	3004	4047	4177	4450	4326	4237	5778	5528
1159	16371	15403	16679	17375	16775	26811	27989	26157	26489	27137	54375	53991	56830	55069	54562	82417	81679	83482	81357	82284	110767	108035	110818	109273	109675		1159	792	882	878	952	903	1247	1302	1354	1238	1403	2820	2612	2700	2666	3009	4061	4188	4463	4340	4240	5789	5539
1160	16433	15459	16764	17434	16832	26913	28100	26258	26597	27215	54592	54170	57033	55257	54723	82720	82039	83784	81655	82589	111183	108386	111272	109646	110078		1160	792	883	878	956	906	1248	1311	1357	1242	1406	2823	2622	2703	2668	3019	4064	4197	4475	4342	4251	5794	5547
1161	16499	15521	16812	17495	16887	27029	28209	26366	26693	27315	54802	54377	57260	55483	54939	83009	82313	84095	81959	82894	111557	108800	111678	110018	110507		1161	799	887	880	958	909	1249	1312	1361	1242	1408	2825	2631	2706	2672	3020	4065	4206	4484	4352	4259	5800	5558
1162	16560	15570	16877	17558	16945	27131	28322	26469	26782	27424	54972	54628	57471	55662	55152	83304	82628	84419	82260	83215	111955	109243	112054	110424	110923		1162	799	887	880	960	910	1250	1313	1363	1244	1410	2829	2632	2710	2674	3033	4076	4214	4492	4369	4263	5816	5565
1163	16620	15622	16960	17619	16999	27230	28450	26563	26882	27517	55185	54838	57667	55859	55369	83594	82944	84738	82542	83513	112342	109576	112491	110836	111328		1163	803	889	880	970	912	1255	1313	1365	1248	1415	2836	2636	2715	2681	3037	4084	4217	4494	4380	4279	5820	5573
1164	16676	15680	17031	17697	17054	27307	28581	26652	26990	27617	55390	55011	57874	56060	55564	83903	83244	85038	82873	83828	112776	110003	112891	111265	111733		1164	806	890	880	971	912	1258	1315	1366	1251	1423	2844	2637	2724	2685	3037	4088	4224	4499	4383	4287	5835	5576
1165	16745	15736	17097	17762	17116	27408	28694	26752	27081	27720	55581	55224	58087	56281	55741	84209	83548	85359	83164	84128	113217	110426	113327	111696	112176		1165	809	894	883	973	917	1259	1321	1366	1252	1426	2846	2640	2729	2691	3044	4102	4228	4519	4388	4292	5846	5587
1166	16805	15795	17156	17837	17178	27517	28793	26846	27175	27815	55803	55422	58273	56483	55909	84516	83848	85691	83479	84437	113652	110838	113747	112130	112608		1166	809	894	883	978	917	1262	1321	1367	1258	1430	2847	2642	2729	2694	3047	4110	4233	4527	4393	4306	5855	5594
1167	16856	15839	17233	17920	17230	27622	28904	26955	27283	27921	55996	55636	58505	56715	56139	84832	84146	86008	83786	84764	114064	111268	114144	112541	113000		1167	810	896	889	979	919	1264	1322	1373	1262	1434	2850	2645	2736	2705	3052	4125	4241	4539	4400	4316	5863	5606
1168	16915	15899	17294	17995	17290	27731	28995	27060	27375	28031	56215	55826	58709	56908	56370	85128	84480	86343	84108	85062	114481	111710	114600	112954	113424		1168	815	898	889	981	920	1271	1324	1374	1265	1437	2855	2653	2738	2707	3054	4132	4250	4545	4408	4315	5875	5616
1169	16981	15953	17359	18054	17359	27833	29099	27172	27471	28135	56411	56045	58942	57128	56561	85468	84778	86673	84444	85363	114935	112176	114992	113362	113831		1169	815	901	891	983	922	1273	1326	1375	1266	1440	2864	2654	2748	2711	3058	4137	4252	4552	4412	4323	5884	5623
1170	17038	16013	17424	18115	17434	27947	29193	27292	27562	28250	56622	56243	59195	57344	56764	85809	85083	87007	84757	85719	115378	112591	115430	113778	114229		1170	815	902	894	985	927	1276	1336	1379	1268	1442	2869	2659	2750	2716	3063	4154	4259	4561	4424	4331	5897	5636
1171	17109	16070	17466	18178	17512	28050	29300	27383	27665	28352	56846	56440	59383	57553	56951	86169	85423	87338	85077	86027	115847	113054	115862	114210	114655		1171	816	904	894	988	927	1283	1340	1379	1270	1442	2872	2664	2753	2725	3079	4161	4269	4565	4426	4338	5906	5643
1172	17175	16124	17519	18248	17577	28159	29419	27475	27776	28435	57044	56668	59624	57755	57150	86520	85700	87651	85390	86368	116289	113463	116313	114649	115071		1172	818	909	893	987	929	1291	1340	1379	1275	1443	2879	2665	2761	2727	3084	4174	4276	4583	4429	4351	5918	5667
1173	17232	16194	17576	18306	17652	28246	29525	27569	27870	28546	57256	56872	59867	57956	57384	86845	86012	87980	85710	86702	116733	113840	116767	115037	115496		1173	817	911	893	988	935	1295	1344	1381	1276	1446	2884	2665	2771	2738	3089	4178	4280	4593	4437	4361	5936	5677
1174	17306	16262	17625	18369	17701	28359	29638	27653	27974	28670	57454	57074	60103	58193	57611	87137	86331	88326	86009	87035	117186	114247	117200	115447	115935		1174	819	912	893	989	935	1295	1345	1384	1275	1451	2888	2676	2776	2739	3102	4182	4280	4598	4443	4372	5944	5682
1175	17376	16324	17693	18429	17766	28468	29743	27756	28059	28763	57667	57311	60317	58413	57811	87444	86652	88683	86302	87369	117578	114661	117621	115863	116361		1175	821	915	894	990	938	1297	1346	1384	1280	1453	2894	2678	2781	2753	3102	4199	4284	4610	4451	4380	5953	5696
1176	17438	16387	17754	18509	17824	28570	29857	27867	28150	28870	57867	57527	60541	58625	58026	87762	86997	89032	86635	87679	118010	115055	118062	116278	116773		1176	823	913	896	992	939	1298	1352	1387	1280	1453	2898	2687	2783	2761	3108	4205	4295	4626	4461	4387	5963	5715
1177	17501	16429	17835	18585	17887	28687	29975	27953	28264	28975	58081	57726	60770	58843	58291	88101	87333	89354	86928	87981	118448	115493	118480	116685	117257		1177	823	913	897	992	940	1301	1354	1388	1285	1453	2899	2688	2791	2764	3107	4212	4308	4641	4469	4399	5974	5718
1178	17570	16502	17904	18655	17948	28799	30082	28055	28351	29077	58306	57941	60988	59068	58509	88413	87636	89683	87249	88326	118870	115911	118937	117124	117655		1178	827	914	900	992	941	1302	1354	1388	1286	1458	2904	2692	2793	2765	3111	4214	4329	4646	4472	4404	5993	5730
1179	17652	16566	17980	18723	18022	28898	30189	28161	28461	29173	58499	58157	61210	59290	58745	88736	87918	90027	87589	88653	119267	116362	119358	117554	118113		1179	827	915	902	992	948	1308	1356	1388	1289	1466	2909	2699	2799	2767	3126	4226	4339	4656	4481	4407	5992	5744
1180	17700	16618	18064	18803	18083	29004	30297	28260	28578	29295	58682	58361	61465	59511	58972	89049	88214	90381	87902	88988	119685	116814	119782	117980	118536		1180	833	916	909	994	948	1310	1358	1391	1289	1471	2913	2703	2803	2771	3130	4235	4344	4663	4488	4413	6007	5751
1181	17779	16676	18139	18874	18157	29087	30405	28379	28683	29395	58910	58559	61676	59730	59176	89365	88562	90709	88248	89297	120121	117213	120239	118420	118973		1181	836	917	911	996	948	1311	1359	1392	1289	1472	2917	2704	2807	2777	3132	4241	4353	4670	4501	4420	6024	5762
1182	17843	16732	18210	18946	18227	29199	30519	28484	28787	29489	59117	58757	61885	59961	59391	89702	88895	91024	88598	89618	120561	117647	120678	118910	119421		1182	840	917	913	999	948	1312	1363	1395	1291	1478	2930	2708	2814	2783	3142	4249	4359	4676	4509	4428	6034	5773
1183	17922	16777	18274	19010	18297	29295	30643	28578	28888	29604	59323	58970	62132	60194	59615	90051	89218	91384	88894	89961	121033	118102	121138	119353	119879		1183	840	916	916	1001	948	1316	1371	1399	1301	1479	2940	2712	2815	2790	3147	4261	4367	4684	4520	4436	6042	5783
1184	18003	16838	18332	19091	18352	29378	30761	28664	28994	29691	59556	59169	62357	60393	59855	90355	89523	91745	89230	90313	121471	118538	121600	119778	120336		1184	841	920	916	1002	950	1321	1372	1399	1302	1484	2945	2719	2821	2794	3149	4272	4376	4684	4537	4439	6054	5792
1185	18057	16886	18412	19167	18437	29494	30868	28790	29107	29830	59794	59408	62554	60610	60095	90694	89862	92069	89556	90640	121934	119027	122025	120221	120785		1185	844	923	917	1005	955	1322	1375	1403	1306	1484	2947	2723	2827	2799	3151	4279	4386	4692	4546	4456	6064	5797
1186	18128	16956	18482	19228	18504	29589	30981	28899	29219	29942	60020	59611	62784	60821	60316	91003	90212	92403	89868	90962	122360	119449	122445	120652	121261		1186	844	924	925	1005	955	1324	1376	1406	1306	1484	2961	2724	2828	2803	3157	4290	4392	4709	4552	4470	6079	5812
1187	18190	17015	18546	19295	18557	29709	31079	28984	29345	30052	60256	59841	63019	61045	60534	91353	90532	92719	90212	91255	122813	119873	122901	121107	121714		1187	844	925	925	1009	955	1323	1379	1406	1307	1488	2962	2736	2832	2808	3161	4299	4393	4721	4564	4472	6083	5832
1188	18280	17070	18607	19359	18629	29807	31200	29114	29456	30171	60465	60060	63256	61303	60770	91695	90861	93052	90565	91582	123266	120314	123337	121519	122157		1188	843	928	926	1008	959	1326	1384	1406	1308	1493	2967	2740	2834	2812	3176	4303	4402	4731	4576	4481	6097	5842
1189	18339	17131	18669	19436	18697	29929	31317	29249	29554	30268	60679	60292	63447	61519	61009	92008	91197	93388	90895	91941	123716	120755	123774	121964	122659		1189	844	929	927	1008	959	1330	1384	1409	1310	1493	2977	2746	2844	2826	3183	4314	4410	4744	4594	4491	6114	5857
1190	18410	17192	18747	19494	18776	30033	31452	29342	29654	30379	60870	60530	63671	61755	61219	92340	91510	93762	91267	92277	124185	121218	124207	122414	123119		1190	844	931	928	1010	961	1332	1387	1413	1311	1497	2982	2750	2854	2832	3196	4317	4417	4753	4606	4500	6119	5869
1191	18478	17261	18814	19565	18854	30138	31558	29464	29779	30491	61104	60785	63918	61971	61441	92685	91855	94112	91611	92640	124663	121712	124648	122847	123586		1191	846	932	931	1011	961	1335	1389	1417	1316	1495	2985	2754	2867	2840	3197	4329	4422	4768	4611	4513	6128	5883
1192	18546	17328	18875	19648	18926	30258	31657	29558	29884	30602	61299	61031	64126	62195	61650	93032	92191	94468	92000	92982	125136	122161	125098	123297	124069		1192	848	935	933	1011	962	1336	1389	1419	1319	1495	3002	2761	2869	2842	3203	4336	4433	4777	4615	4519	6141	5894
1193	18635	17384	18947	19720	19005	30392	31773	29673	29990	30714	61537	61248	64374	62413	61893	93432	92528	94802	92370	93307	125604	122608	125586	123725	124518		1193	848	937	937	1011	964	1341	1390	1421	1320	1497	3009	2764	2869	2850	3213	4342	4440	4792	4622	4524	6143	5905
1194	18704	17442	19011	19802	19081	30522	31890	29794	30105	30838	61756	61493	64607	62653	62122	93775	92894	95146	92705	93652	126074	123020	126060	124196	124956		1194	849	941	943	1013	966	1342	1390	1421	1322	1499	3015	2768	2881	2853	3214	4348	4460	4797	4630	4529	6154	5910
1195	18769	17512	19087	19881	19157	30630	32001	29905	30212	30955	61997	61683	64834	62889	62362	94126	93228	95512	93058	94006	126537	123490	126521	124666	125452		1195	852	941	945	1014	966	1345	1392	1425	1324	1501	3019	2771	2885	2857	3216	4359	4472	4814	4641	4537	6159	5921
1196	18838	17577	19148	19942	19235	30741	32114	30010	30316	31085	62211	61920	65096	63123	62589	94485	93571	95844	93412	94305	127019	123948	127009	125175	125915		1196	855	942	946	1016	966	1347	1393	1429	1327	1502	3024	2775	2888	2864	3218	4367	4477	4825	4648	4544	6168	5922
1197	18908	17648	19231	20006	19297	30869	32231	30108	30433	31188	62446	62144	65332	63353	62820	94793	93897	96226	93760	94683	127501	124411	127455	125637	126358		1197	855	942	949	1018	967	1349	1396	1430	1329	1501	3030	2778	2895	2873	3225	4376	4487	4834	4658	4544	6176	5931
1198	18990	17702	19305	20073	19377	30973	32327	30207	30539	31306	62671	62354	65588	63593	63058	95163	94268	96593	94111	95046	127966	124887	127912	126081	126832		1198	855	945	950	1020	968	1353	1401	1433	1334	1507	3031	2793	2901	2880	3227	4390	4494	4837	4662	4552	6182	5937
1199	19066	17775	19389	20150	19445	31099	32422	30309	30668	31422	62889	62568	65847	63824	63318	95493	94612	96969	94459	95422	128480	125346	128422	126543	127283		1199	855	946	951	1023	968	1355	1402	1439	1334	1513	3036	2802	2905	2882	3233	4392	4496	4842	4666	4560	6197	5946
1200	19141	17843	19444	20222	19512	31221	32529	30421	30792	31547	63106	62789	66103	64076	63552	95876	94958	97313	94812	95753	128952	125809	128902	127006	127806		1200	860	947	959	1023	974	1357	1409	1442	1338	1518	3043	2822	2909	2884	3239	4411	4505	4862	4680	4569	6215	5965
1201	19215	17903	19510	20292	19571	31335	32639	30555	30917	31672	63361	63031	66342	64297	63782	96215	95321	97670	95194	96107	129428	126255	129412	127462	128270		1201	860	950	959	1026	974	1362	1409	1444	1340	1519	3047	2826	2914	2888	3245	4424	4517	4868	4685	4577	6225	5977
1202	19289	17971	19577	20381	19639	31434	32768	30684	31051	31776	63598	63264	66600	64521	64025	96553	95683	98032	95550	96479	129885	126732	129871	127937	128772		1202	861	950	959	1026	974	1364	1411	1445	1343	1519	3049	2831	2919	2904	3250	4438	4524	4888	4690	4580	6233	5987
1203	19377	18036	19646	20458	19732	31524	32893	30770	31172	31894	63842	63523	66859	64775	64243	96927	96044	98400	95866	96844	130409	127193	130349	128393	129268		1203	866	951	959	1027	974	1366	1416	1449	1348	1520	3053	2839	2925	2910	3251	4448	4529	4899	4698	4583	6244	6000
1204	19462	18106	19707	20531	19807	31645	33031	30887	31293	32022	64063	63771	67092	65017	64485	97276	96423	98730	96237	97223	130856	127650	130897	128848	129710		1204	870	950	959	1028	975	1367	1420	1450	1348	1524	3056	2841	2941	2918	3261	4453	4532	4909	4710	4594	6256	6014
1205	19549	18170	19796	20602	19884	31774	33172	31004	31401	32148	64292	64007	67320	65260	64751	97639	96785	99116	96585	97545	131348	128143	131389	129328	130214		1205	873	954	962	1036	983	1367	1426	1455	1351	1526	3060	2845	2942	2924	3272	4459	4543	4919	4721	4604	6265	6040
1206	19616	18234	19857	20661	19954	31879	33310	31144	31505	32284	64534	64259	67580	65501	64983	98030	97145	99506	96974	97916	131833	128615	131861	129806	130690		1206	873	961	964	1041	987	1371	1430	1455	1351	1529	3068	2846	2947	2929	3275	4465	4550	4933	4737	4619	6274	6053
1207	19699	18301	19926	20745	20026	32018	33424	31267	31615	32401	64788	64498	67843	65738	65229	98423	97512	99893	97364	98267	132296	129108	132315	130282	131149		1207	873	965	967	1043	987	1371	1433	1457	1353	1532	3072	2848	2950	2931	3289	4476	4553	4948	4748	4628	6288	6074
1208	19772	18366	19997	20820	20093	32120	33543	31374	31718	32529	65035	64747	68075	65960	65476	98818	97889	100256	97716	98621	132787	129568	132818	130783	131644		1208	875	970	967	1048	990	1371	1436	1459	1355	1534	3075	2865	2952	2937	3290	4486	4560	4955	4765	4639	6302	6086
1209	19838	18436	20077	20889	20163	32236	33670	31487	31842	32641	65299	64974	68303	66222	65713	99190	98234	100607	98114	98997	133280	130047	133307	131296	132106		1209	878	970	970	1050	992	1376	1439	1460	1356	1534	3078	2868	2956	2936	3303	4499	4564	4962	4775	4641	6311	6096
1210	19914	18487	20151	20959	20247	32349	33789	31603	31969	32757	65549	65203	68528	66457	65963	99543	98618	100983	98453	99324	133761	130557	133816	131813	132608		1210	882	972	972	1056	992	1377	1440	1463	1359	1535	3086	2871	2962	2950	3312	4510	4574	4981	4776	4646	6325	6104
1211	20003	18560	20225	21037	20336	32455	33926	31711	32084	32863	65795	65423	68787	66715	66191	99929	99010	101383	98828	99701	134253	131037	134338	132310	133093		1211	883	973	973	1056	992	1383	1443	1469	1364	1541	3092	2877	2972	2964	3318	4515	4581	5006	4792	4660	6342	6117
1212	20066	18634	20306	21117	20411	32584	34043	31821	32201	32993	66012	65671	69002	66965	66479	100341	99415	101742	99209	100041	134783	131497	134796	132788	133586		1212	889	976	973	1058	996	1384	1452	1473	1366	1542	3097	2881	2978	2968	3323	4524	4591	5015	4800	4673	6356	6126
1213	20152	18714	20392	21200	20485	32708	34165	31933	32308	33118	66286	65924	69277	67220	66749	100707	99779	102097	99573	100413	135272	132000	135273	133278	134081		1213	892	977	973	1061	998	1385	1452	1473	1369	1541	3107	2885	2980	2974	3326	4530	4604	5020	4811	4687	6361	6138
1214	20208	18790	20474	21289	20565	32829	34278	32071	32451	33232	66543	66175	69531	67472	66984	101082	100161	102444	99945	100778	135778	132485	135797	133794	134617		1214	892	979	976	1064	1002	1387	1454	1476	1375	1543	3111	2893	2989	2978	3337	4540	4611	5029	4824	4697	6371	6144
1215	20271	18853	20540	21355	20644	32954	34412	32188	32571	33344	66812	66395	69771	67726	67228	101478	100505	102797	100313	101186	136296	132933	136323	134309	135120		1215	897	979	977	1066	1006	1388	1453	1477	1377	1550	3120	2901	2992	2982	3344	4548	4623	5035	4833	4718	6388	6164
1216	20346	18922	20608	21431	20733	33088	34540	32332	32695	33479	67047	66690	70032	67964	67454	101877	100865	103200	100705	101550	136812	133451	136857	134843	135635		1216	899	981	978	1067	1006	1390	1455	1478	1378	1551	3129	2907	2995	2984	3355	4565	4636	5038	4843	4723	6411	6170
1217	20424	18987	20674	21504	20827	33197	34655	32444	32818	33600	67313	66938	70300	68229	67715	102246	101255	103565	101059	101943	137321	133990	137327	135389	136200		1217	899	986	978	1070	1006	1392	1459	1480	1381	1556	3140	2910	2997	2988	3367	4579	4642	5052	4850	4733	6430	6180
1218	20510	19061	20737	21588	20916	33328	34777	32569	32940	33704	67540	67185	70562	68473	67932	102617	101635	104014	101445	102358	137785	134460	137826	135902	136671		1218	899	986	979	1072	1006	1393	1464	1483	1386	1562	3146	2910	3005	3002	3377	4588	4653	5065	4856	4737	6443	6198
1219	20581	19129	20814	21665	20987	33449	34880	32677	33067	33843	67808	67451	70819	68714	68175	103000	102020	104411	101862	102729	138312	134957	138347	136369	137163		1219	899	993	979	1075	1006	1396	1467	1487	1388	1566	3153	2914	3006	3003	3382	4596	4666	5071	4876	4747	6457	6212
1220	20657	19201	20891	21756	21061	33569	35006	32820	33185	33967	68078	67680	71061	68970	68437	103379	102401	104809	102262	103150	138786	135439	138891	136878	137643		1220	906	994	983	1078	1008	1395	1470	1490	1393	1574	3157	2918	3011	3006	3389	4606	4673	5086	4894	4767	6475	6220
1221	20747	19283	20962	21848	21144	33700	35134	32944	33316	34089	68339	67945	71347	69243	68707	103767	102759	105201	102642	103570	139290	135926	139406	137421	138140		1221	910	994	984	1080	1008	1399	1474	1494	1393	1575	3169	2925	3012	3009	3398	4611	4683	5094	4908	4791	6491	6244
1222	20822	19367	21051	21947	21219	33814	35259	33067	33438	34209	68591	68213	71654	69499	68935	104157	103148	105583	102952	103969	139830	136432	139922	137963	138711		1222	910	997	983	1082	1011	1403	1473	1494	1395	1577	3174	2933	3016	3019	3404	4623	4694	5099	4917	4801	6502	6254
1223	20899	19443	21125	22032	21287	33929	35409	33201	33599	34328	68839	68443	71907	69753	69165	104554	103561	105990	103314	104341	140327	136934	140459	138479	139260		1223	911	999	985	1089	1012	1405	1474	1492	1399	1583	3175	2933	3019	3033	3412	4626	4700	5110	4927	4812	6524	6275
1224	20962	19516	21217	22106	21343	34039	35525	33345	33742	34457	69057	68700	72169	70029	69440	104944	103949	106389	103683	104745	140827	137499	140992	138965	139724		1224	913	1000	986	1089	1015	1406	1477	1497	1401	1585	3186	2940	3024	3034	3418	4634	4707	5116	4932	4823	6531	6280
1225	21042	19573	21300	22196	21412	34160	35655	33463	33867	34588	69340	68948	72450	70309	69695	105328	104305	106742	104062	105088	141349	138056	141466	139469	140238		1225	916	1002	986	1090	1016	1410	1477	1507	1401	1587	3187	2948	3026	3038	3428	4650	4730	5125	4947	4830	6543	6297
1226	21110	19643	21373	22278	21467	34305	35788	33591	34006	34720	69599	69217	72723	70560	69949	105694	104661	107159	104446	105478	141851	138585	142023	139970	140788		1226	920	1002	987	1093	1020	1412	1477	1516	1404	1591	3190	2952	3037	3043	3425	4666	4747	5139	4958	4836	6552	6321
1227	21199	19707	21474	22358	21549	34438	35918	33725	34121	34839	69840	69480	73002	70828	70174	106088	105046	107582	104812	105876	142373	139097	142560	140519	141297		1227	924	1005	988	1095	1022	1413	1479	1521	1409	1601	3195	2956	3041	3051	3430	4674	4758	5143	4968	4846	6565	6332
1228	21281	19760	21556	22462	21618	34583	36072	33867	34234	34967	70106	69772	73265	71101	70465	106492	105471	107991	105177	106290	142899	139600	143075	141032	141795		1228	925	1008	990	1095	1023	1416	1479	1521	1413	1606	3205	2957	3049	3058	3436	4676	4772	5149	4979	4851	6579	6338
1229	21381	19827	21632	22563	21695	34709	36225	33988	34368	35096	70366	69999	73567	71373	70725	106882	105868	108390	105576	106684	143461	140101	143626	141567	142313		1229	927	1008	993	1096	1025	1419	1478	1523	1417	1612	3210	2961	3063	3064	3447	4687	4784	5163	4985	4856	6588	6343
1230	21455	19895	21716	22653	21777	34815	36339	34113	34495	35217	70626	70275	73838	71667	70973	107274	106259	108772	105938	107094	143983	140592	144158	142108	142827		1230	928	1008	993	1101	1026	1423	1481	1524	1418	1618	3220	2965	3067	3078	3460	4697	4795	5167	4995	4862	6601	6357
1231	21526	19954	21790	22740	21849	34932	36484	34234	34620	35348	70879	70577	74113	71973	71238	107696	106637	109188	106345	107475	144532	141132	144732	142626	143348		1231	932	1010	996	1103	1028	1426	1481	1524	1420	1619	3229	2977	3075	3081	3464	4706	4799	5173	5001	4869	6611	6364
1232	21610	20023	21863	22825	21939	35027	36614	34356	34725	35485	71117	70834	74393	72227	71475	108113	107047	109552	106734	107887	144997	141648	145272	143176	143876		1232	932	1014	1000	1105	1029	1431	1487	1527	1421	1620	3232	2985	3077	3091	3472	4710	4804	5184	5015	4873	6621	6375
1233	21697	20107	21951	22915	22026	35156	36735	34477	34856	35605	71402	71075	74678	72518	71748	108516	107449	109958	107117	108314	145462	142170	145806	143697	144402		1233	933	1014	1002	1104	1031	1433	1489	1530	1424	1625	3235	2992	3084	3103	3477	4718	4813	5199	5021	4879	6632	6388
1234	21767	20178	22010	23000	22141	35288	36860	34597	34992	35733	71665	71359	74972	72769	72038	108949	107827	110368	107549	108730	146034	142703	146377	144236	144947		1234	933	1016	1003	1108	1031	1434	1495	1533	1423	1636	3240	2994	3100	3114	3491	4723	4816	5206	5024	4887	6641	6389
1235	21832	20251	22093	23080	22230	35422	36997	34719	35126	35859	71960	71634	75227	73018	72291	109346	108237	110749	107976	109134	146567	143285	146900	144795	145537		1235	936	1020	1008	1111	1039	1436	1501	1534	1426	1642	3245	3003	3106	3117	3498	4737	4832	5222	5038	4897	6653	6399
1236	21913	20333	22176	23174	22326	35552	37120	34842	35253	36001	72193	71905	75529	73306	72593	109745	108645	111170	108342	109519	147114	143806	147486	145286	146063		1236	938	1022	1009	1113	1042	1438	1502	1536	1428	1647	3254	3004	3113	3125	3503	4742	4844	5231	5050	4915	6677	6420
1237	22016	20422	22255	23242	22408	35687	37261	34976	35386	36129	72461	72176	75794	73591	72877	110127	109056	111586	108750	109899	147705	144318	148029	145854	146639		1237	939	1022	1013	1119	1043	1443	1506	1539	1434	1649	3261	3010	3116	3130	3512	4760	4844	5245	5065	4933	6695	6434
1238	22086	20525	22331	23337	22487	35835	37404	35110	35516	36261	72765	72440	76042	73864	73181	110549	109436	112007	109136	110364	148250	144842	148597	146384	147183		1238	940	1023	1014	1121	1046	1447	1507	1544	1438	1649	3263	3030	3119	3132	3518	4763	4851	5255	5075	4940	6713	6456
1239	22157	20605	22403	23413	22583	35971	37537	35260	35650	36392	73057	72711	76344	74151	73452	110961	109846	112443	109535	110778	148788	145380	149130	146951	147695		1239	943	1026	1014	1121	1052	1449	1509	1547	1439	1658	3274	3032	3127	3141	3525	4775	4860	5270	5093	4946	6728	6470
1240	22254	20676	22473	23497	22665	36127	37702	35411	35797	36523	73331	73008	76612	74439	73716	111329	110257	112844	109943	111200	149357	145909	149654	147466	148242		1240	942	1023	1021	1125	1055	1449	1510	1546	1445	1661	3284	3044	3128	3146	3535	4789	4878	5284	5109	4956	6742	6499
1241	22329	20756	22578	23592	22761	36273	37856	35558	35930	36654	73599	73279	76900	74688	73988	111733	110671	113265	110334	111620	149942	146438	150192	147994	148825		1241	944	1025	1027	1129	1060	1453	1514	1552	1451	1665	3292	3051	3132	3156	3539	4797	4884	5297	5123	4964	6751	6512
1242	22401	20851	22661	23676	22833	36403	37998	35691	36065	36810	73907	73535	77222	74972	74255	112109	111101	113692	110720	112053	150521	147026	150770	148546	149393		1242	945	1025	1032	1131	1060	1460	1521	1554	1453	1666	3300	3058	3143	3170	3546	4804	4890	5313	5134	4970	6774	6529
1243	22476	20930	22768	23762	22935	36530	38107	35822	36184	36944	74183	73778	77497	75258	74569	112525	111550	114091	111167	112441	151036	147560	151295	149108	149964		1243	945	1026	1032	1132	1061	1464	1524	1557	1456	1667	3304	3075	3150	3182	3554	4818	4899	5321	5144	4984	6782	6534
1244	22565	21006	22853	23834	23039	36662	38240	35977	36321	37049	74461	74057	77802	75551	74837	112922	111964	114508	111576	112872	151590	148081	151860	149635	150528		1244	948	1026	1036	1134	1064	1471	1532	1560	1456	1671	3327	3085	3149	3182	3572	4833	4913	5332	5158	4989	6799	6546
1245	22652	21079	22926	23937	23132	36813	38363	36120	36454	37209	74728	74347	78087	75827	75108	113351	112373	114964	111978	113263	152155	148660	152409	150217	151092		1245	949	1026	1037	1135	1065	1474	1538	1561	1460	1675	3332	3086	3157	3187	3575	4841	4918	5331	5170	4994	6807	6554
1246	22733	21163	23020	24030	23224	36972	38509	36267	36590	37327	75003	74650	78375	76128	75386	113796	112795	115390	112412	113701	152751	149238	152991	150756	151624		1246	949	1028	1039	1135	1066	1478	1546	1567	1461	1675	3339	3088	3161	3192	3577	4849	4932	5359	5176	5020	6828	6572
1247	22816	21233	23095	24140	23303	37084	38661	36409	36721	37461	75287	74951	78660	76385	75669	114224	113214	115813	112839	114109	153330	149785	153524	151343	152189		1247	950	1030	1039	1134	1067	1478	1545	1571	1474	1676	3344	3093	3167	3192	3580	4858	4937	5369	5190	5035	6834	6580
1248	22895	21314	23179	24236	23415	37233	38813	36534	36867	37613	75547	75212	78949	76692	75929	114609	113670	116217	113220	114536	153926	150346	154067	151919	152740		1248	953	1037	1045	1134	1067	1477	1547	1571	1473	1677	3345	3096	3169	3196	3589	4863	4948	5380	5209	5047	6842	6596
1249	22984	21375	23279	24334	23495	37374	38957	36676	37022	37762	75841	75506	79232	76963	76205	115051	114106	116619	113655	114974	154510	150935	154644	152463	153313		1249	953	1042	1046	1135	1071	1479	1552	1572	1476	1677	3347	3102	3182	3199	3596	4873	4955	5385	5224	5063	6860	6617
1250	23079	21460	23366	24424	23569	37515	39099	36810	37166	37905	76144	75773	79516	77232	76462	115453	114544	117019	114071	115384	155100	151526	155219	153026	153894		1250	956	1045	1047	1137	1071	1482	1554	1580	1476	1676	3352	3117	3182	3200	3608	4882	4963	5392	5231	5077	6890	6628
1251	23160	21537	23438	24503	23649	37662	39264	36946	37319	38054	76416	76045	79836	77498	76740	115907	114998	117453	114484	115814	155674	152080	155784	153628	154525		1251	961	1047	1048	1138	1070	1482	1556	1582	1477	1688	3362	3117	3189	3208	3616	4889	4978	5395	5247	5087	6900	6639
1252	23235	21638	23521	24594	23732	37809	39405	37067	37449	38181	76718	76343	80137	77816	77021	116347	115395	117909	114938	116240	156272	152669	156328	154215	155122		1252	962	1051	1049	1139	1073	1486	1558	1589	1477	1690	3370	3117	3190	3210	3624	4901	4986	5409	5256	5098	6912	6656
1253	23314	21713	23593	24685	23818	37954	39544	37206	37593	38322	77021	76626	80428	78111	77293	116815	115820	118337	115361	116665	156865	153285	156927	154770	155681		1253	962	1054	1052	1140	1076	1486	1565	1595	1481	1692	3373	3120	3190	3220	3629	4907	4988	5426	5260	5102	6930	6680
1254	23401	21786	23689	24778	23925	38086	39696	37348	37745	38474	77330	76924	80739	78417	77595	117242	116288	118770	115804	117127	157432	153827	157521	155363	156269		1254	964	1059	1053	1144	1076	1488	1571	1594	1488	1703	3381	3128	3194	3226	3634	4910	5001	5443	5273	5112	6940	6709
1255	23481	21863	23775	24851	24012	38244	39843	37485	37896	38612	77590	77212	81038	78709	77909	117707	116713	119217	116210	117561	157998	154392	158094	155960	156885		1255	964	1059	1058	1148	1079	1492	1573	1597	1492	1712	3390	3133	3196	3236	3652	4916	5009	5452	5281	5122	6948	6713
1256	23576	21936	23853	24958	24088	38376	39972	37638	38026	38752	77871	77485	81367	78988	78172	118111	117170	119623	116662	117951	158612	154984	158663	156545	157498		1256	971	1059	1060	1151	1082	1497	1577	1602	1496	1713	3402	3141	3198	3244	3654	4920	5014	5460	5285	5132	6965	6725
1257	23671	22006	23954	25063	24177	38510	40123	37778	38164	38919	78147	77753	81673	79263	78478	118537	117591	120074	117103	118393	159184	155572	159251	157121	158071		1257	974	1060	1059	1156	1091	1498	1577	1606	1500	1715	3407	3148	3202	3252	3660	4936	5031	5478	5293	5144	6974	6729
1258	23752	22104	24037	25162	24256	38648	40272	37891	38305	39074	78424	78028	81991	79576	78794	118958	118018	120567	117550	118821	159741	156141	159870	157706	158638		1258	974	1061	1063	1159	1091	1501	1579	1606	1501	1725	3416	3148	3213	3266	3675	4946	5043	5497	5304	5150	6983	6737
1259	23840	22198	24130	25240	24347	38794	40447	38035	38457	39241	78703	78313	82308	79860	79113	119473	118438	120999	118001	119239	160332	156694	160474	158287	159194		1259	974	1061	1063	1162	1092	1501	1582	1612	1504	1731	3422	3159	3222	3267	3684	4956	5057	5503	5316	5159	6997	6743
1260	23918	22279	24230	25340	24434	38924	40597	38187	38626	39382	78993	78578	82609	80170	79405	119910	118877	121467	118475	119708	160975	157291	161088	158876	159809		1260	975	1065	1072	1162	1093	1499	1584	1613	1506	1735	3425	3173	3232	3269	3690	4959	5069	5525	5325	5168	7011	6754
1261	24007	22358	24317	25434	24521	39066	40749	38327	38774	39532	79294	78851	82882	80453	79690	120393	119302	121898	118938	120122	161587	157883	161701	159454	160415		1261	979	1065	1074	1164	1091	1498	1586	1614	1510	1741	3438	3177	3248	3274	3704	4972	5078	5542	5330	5177	7026	6783
1262	24104	22461	24400	25522	24610	39211	40893	38462	38935	39698	79583	79142	83164	80743	80016	120825	119734	122320	119378	120587	162181	158490	162308	160053	161003		1262	982	1072	1075	1166	1093	1504	1587	1619	1514	1751	3449	3183	3259	3282	3711	4979	5094	5553	5336	5193	7049	6799
1263	24185	22564	24485	25618	24706	39338	41064	38594	39062	39847	79840	79445	83458	81055	80320	121252	120193	122815	119804	121078	162785	159062	162907	160622	161557		1263	982	1077	1077	1166	1093	1514	1589	1619	1516	1751	3462	3185	3268	3287	3722	4984	5109	5561	5343	5193	7066	6809
1264	24268	22645	24572	25717	24793	39487	41201	38738	39204	39973	80170	79716	83742	81351	80586	121694	120651	123264	120242	121500	163390	159644	163496	161228	162189		1264	983	1076	1078	1169	1096	1515	1591	1622	1517	1754	3469	3190	3279	3296	3729	4992	5118	5580	5354	5201	7088	6819
1265	24358	22729	24664	25815	24892	39636	41363	38863	39352	40090	80492	80008	84038	81637	80893	122159	121095	123738	120682	121967	163987	160187	164114	161874	162743		1265	989	1079	1078	1175	1098	1520	1597	1628	1518	1758	3479	3205	3282	3308	3737	4998	5123	5584	5370	5210	7100	6833
1266	24463	22804	24750	25903	24983	39796	41502	39013	39500	40224	80775	80291	84344	81945	81197	122605	121524	124205	121156	122463	164593	160858	164750	162497	163331		1266	1004	1085	1078	1179	1097	1520	1598	1628	1519	1760	3483	3207	3291	3313	3743	5003	5133	5605	5381	5219	7117	6841
1267	24551	22904	24864	26003	25068	39941	41666	39174	39629	40369	81087	80574	84649	82261	81529	123070	121964	124674	121585	122917	165257	161415	165376	163077	163910		1267	1009	1087	1081	1179	1103	1520	1601	1634	1520	1760	3490	3212	3295	3324	3749	5018	5147	5615	5398	5230	7131	6857
1268	24651	22986	24951	26119	25140	40082	41827	39319	39755	40520	81369	80848	84980	82585	81831	123519	122393	125165	122055	123365	165879	161999	165997	163651	164529		1268	1009	1087	1082	1182	1106	1525	1602	1635	1520	1766	3494	3221	3302	3337	3757	5027	5150	5637	5421	5236	7147	6883
1269	24740	23061	25040	26196	25235	40221	41995	39455	39906	40667	81683	81148	85299	82887	82133	123961	122841	125654	122503	123844	166485	162592	166648	164281	165169		1269	1009	1088	1083	1187	1112	1526	1603	1637	1523	1772	3494	3229	3308	3340	3763	5032	5163	5658	5430	5241	7165	6902
1270	24821	23142	25112	26286	25323	40355	42163	39601	40042	40799	82019	81448	85618	83168	82469	124449	123309	126112	122940	124304	167109	163204	167264	164923	165744		1270	1012	1092	1083	1190	1124	1533	1608	1640	1526	1777	3499	3232	3309	3343	3772	5041	5169	5679	5446	5253	7178	6920
1271	24903	23227	25197	26391	25417	40515	42333	39726	40183	40956	82344	81739	85978	83488	82791	124924	123722	126554	123393	124720	167714	163773	167863	165523	166356		1271	1012	1092	1084	1193	1125	1533	1610	1641	1529	1778	3507	3235	3320	3358	3775	5046	5187	5694	5458	5258	7188	6931
1272	24989	23310	25299	26492	25517	40663	42490	39857	40334	41114	82659	82068	86311	83774	83060	125411	124199	127029	123869	125191	168366	164424	168516	166146	166978		1272	1015	1091	1084	1193	1127	1538	1623	1642	1536	1783	3519	3242	3325	3365	3787	5067	5196	5709	5464	5267	7204	6942
1273	25067	23397	25396	26607	25615	40826	42655	39999	40483	41259	82964	82366	86611	84093	83376	125876	124620	127467	124339	125638	169025	165050	169140	166810	167594		1273	1019	1090	1085	1203	1134	1541	1625	1649	1541	1784	3525	3258	3333	3369	3791	5076	5201	5715	5478	5278	7218	6944
1274	25156	23480	25491	26702	25707	40966	42838	40129	40633	41436	83275	82682	86942	84424	83685	126347	125082	127916	124809	126106	169686	165646	169728	167437	168220		1274	1023	1089	1085	1205	1138	1542	1628	1656	1542	1787	3528	3260	3341	3373	3798	5085	5210	5728	5496	5281	7228	6967
1275	25255	23564	25591	26808	25795	41134	43000	40279	40770	41600	83571	83029	87284	84764	84021	126858	125552	128384	125272	126559	170312	166221	170345	168052	168841		1275	1026	1093	1095	1205	1142	1548	1629	1663	1542	1793	3538	3264	3345	3375	3809	5091	5221	5736	5510	5300	7240	6983
1276	25342	23669	25691	26893	25883	41294	43155	40420	40944	41744	83864	83345	87623	85041	84342	127305	125970	128882	125771	127051	170937	166812	170986	168661	169486		1276	1028	1096	1099	1209	1144	1552	1633	1666	1541	1795	3551	3270	3357	3383	3813	5098	5232	5742	5512	5303	7258	7007
1277	25436	23756	25785	26995	25975	41446	43312	40582	41095	41915	84181	83638	87970	85361	84646	127775	126420	129365	126260	127555	171582	167440	171644	169347	170080		1277	1028	1099	1099	1212	1145	1554	1635	1666	1542	1797	3556	3274	3362	3393	3821	5108	5241	5755	5530	5314	7271	7029
1278	25541	23844	25879	27118	26070	41606	43464	40730	41254	42059	84490	83950	88280	85646	84962	128219	126881	129831	126738	128044	172251	168039	172256	169963	170715		1278	1031	1098	1101	1213	1149	1562	1639	1668	1543	1801	3565	3279	3371	3401	3834	5117	5248	5771	5548	5330	7284	7043
1279	25644	23944	25964	27231	26178	41760	43624	40868	41432	42216	84804	84248	88635	85949	85262	128651	127357	130357	127235	128532	172872	168695	172896	170628	171350		1279	1032	1100	1106	1215	1150	1561	1659	1672	1543	1805	3576	3284	3374	3408	3839	5126	5264	5778	5564	5336	7292	7053
1280	25735	24033	26066	27340	26274	41919	43788	41037	41581	42375	85112	84564	88970	86278	85561	129151	127842	130845	127708	129001	173576	169320	173509	171296	171992		1280	1033	1106	1111	1223	1151	1568	1660	1672	1547	1807	3587	3294	3382	3423	3841	5128	5272	5788	5579	5346	7306	7061
1281	25852	24128	26158	27435	26350	42092	43947	41180	41731	42547	85430	84878	89280	86587	85852	129637	128297	131295	128186	129456	174214	169966	174133	171910	172614		1281	1035	1105	1112	1224	1151	1571	1662	1681	1548	1812	3593	3297	3390	3430	3847	5144	5280	5797	5605	5361	7318	7097
1282	25942	24222	26246	27529	26430	42247	44119	41325	41900	42696	85760	85181	89643	86920	86183	130154	128757	131783	128672	129951	174850	170600	174807	172567	173240		1282	1034	1106	1114	1230	1157	1574	1664	1686	1554	1814	3602	3305	3396	3437	3857	5158	5290	5807	5610	5372	7340	7111
1283	26048	24334	26343	27629	26532	42424	44289	41484	42054	42861	86082	85470	89989	87258	86516	130639	129246	132294	129137	130445	175531	171271	175461	173220	173821		1283	1036	1109	1119	1233	1156	1575	1668	1688	1556	1815	3603	3303	3401	3442	3863	5159	5296	5822	5622	5380	7351	7130
1284	26147	24431	26449	27713	26624	42597	44459	41630	42203	43018	86390	85793	90323	87571	86843	131128	129776	132811	129580	130947	176167	171916	176130	173907	174467		1284	1037	1118	1120	1239	1159	1584	1670	1692	1557	1815	3606	3307	3411	3447	3873	5173	5300	5832	5627	5404	7370	7151
1285	26246	24525	26544	27802	26739	42767	44633	41778	42363	43181	86713	86106	90682	87894	87159	131619	130292	133289	129990	131435	176789	172534	176814	174551	175125		1285	1037	1119	1122	1243	1160	1586	1674	1695	1560	1814	3615	3316	3414	3456	3876	5191	5321	5848	5650	5411	7385	7167
1286	26336	24634	26648	27912	26858	42903	44814	41942	42525	43327	87014	86442	91038	88239	87468	132108	130799	133800	130476	131886	177432	173137	177490	175235	175809		1286	1039	1119	1123	1243	1169	1587	1677	1701	1562	1827	3627	3323	3425	3462	3883	5200	5342	5858	5661	5430	7391	7186
1287	26415	24719	26738	28010	26955	43050	44960	42076	42686	43491	87328	86775	91382	88581	87812	132583	131287	134295	130965	132382	178088	173787	178183	175859	176470		1287	1040	1121	1124	1245	1171	1589	1681	1710	1568	1834	3630	3333	3427	3464	3888	5212	5351	5869	5669	5441	7412	7210
1288	26506	24823	26838	28120	27059	43195	45122	42246	42847	43630	87662	87076	91706	88899	88142	133081	131730	134766	131450	132846	178763	174407	178865	176551	177119		1288	1043	1123	1125	1247	1173	1589	1685	1715	1573	1837	3639	3341	3430	3475	3899	5225	5367	5887	5685	5455	7429	7227
1289	26590	24916	26955	28231	27140	43351	45306	42401	43004	43822	88015	87395	92039	89229	88452	133615	132194	135256	131922	133326	179386	175080	179516	177278	177756		1289	1044	1125	1127	1248	1176	1592	1698	1714	1577	1848	3648	3345	3438	3486	3912	5231	5378	5899	5689	5466	7452	7246
1290	26709	25005	27053	28312	27255	43506	45467	42545	43148	43989	88322	87704	92395	89564	88799	134123	132690	135777	132435	133808	180110	175699	180153	177963	178431		1290	1049	1125	1132	1251	1178	1600	1701	1718	1577	1855	3658	3351	3449	3502	3923	5236	5396	5910	5698	5476	7468	7257
1291	26804	25106	27157	28415	27351	43709	45640	42719	43324	44152	88652	88024	92735	89901	89114	134599	133185	136295	132932	134327	180789	176315	180849	178636	179089		1291	1052	1126	1132	1253	1180	1604	1702	1725	1582	1860	3680	3361	3459	3504	3931	5246	5409	5929	5708	5493	7484	7268
1292	26889	25179	27272	28524	27444	43869	45789	42871	43476	44326	88990	88342	93062	90209	89473	135108	133657	136789	133426	134817	181487	176951	181530	179282	179738		1292	1056	1130	1136	1256	1187	1606	1703	1731	1585	1862	3689	3364	3468	3507	3936	5259	5422	5941	5720	5498	7495	7283
1293	26989	25274	27370	28639	27556	44019	45941	43020	43626	44484	89325	88675	93406	90580	89800	135588	134085	137288	133913	135308	182154	177608	182178	179917	180418		1293	1060	1133	1141	1258	1189	1614	1706	1735	1586	1863	3699	3370	3491	3516	3944	5264	5429	5964	5728	5511	7508	7297
1294	27086	25364	27478	28750	27660	44195	46119	43170	43801	44632	89683	88996	93766	90917	90137	136082	134579	137776	134382	135777	182831	178273	182834	180612	181122		1294	1061	1137	1141	1260	1190	1615	1708	1739	1594	1868	3712	3384	3500	3526	3953	5274	5437	5972	5745	5527	7523	7310
1295	27184	25479	27592	28850	27792	44367	46272	43345	43976	44793	90016	89320	94125	91246	90482	136600	135107	138256	134855	136294	183474	178953	183515	181274	181800		1295	1064	1142	1149	1262	1190	1614	1708	1744	1598	1868	3716	3395	3512	3531	3955	5283	5450	5993	5759	5539	7539	7317
1296	27281	25581	27685	28943	27914	44542	46441	43509	44142	44976	90343	89676	94513	91573	90818	137113	135650	138738	135349	136800	184169	179640	184247	181914	182497		1296	1065	1148	1151	1264	1191	1617	1715	1747	1601	1876	3727	3402	3530	3544	3969	5297	5466	5999	5769	5551	7568	7324
1297	27377	25676	27796	29029	28009	44734	46612	43667	44309	45157	90697	90002	94868	91892	91144	137630	136164	139272	135842	137306	184930	180317	184902	182586	183174		1297	1065	1152	1152	1266	1193	1626	1718	1750	1605	1891	3740	3411	3537	3557	3976	5305	5477	6013	5779	5562	7592	7342
1298	27499	25767	27892	29134	28113	44934	46778	43825	44481	45339	91038	90350	95234	92222	91473	138157	136632	139784	136324	137812	185650	181000	185600	183259	183863		1298	1067	1155	1154	1266	1196	1626	1719	1749	1609	1894	3741	3411	3549	3567	3989	5314	5495	6023	5791	5571	7603	7350
1299	27593	25877	28005	29233	28216	45095	46963	43995	44651	45546	91365	90698	95625	92557	91820	138661	137127	140340	136796	138295	186368	181676	186253	183925	184562		1299	1069	1157	1155	1268	1197	1631	1719	1753	1611	1898	3747	3420	3563	3573	3999	5323	5518	6035	5809	5584	7616	7358
1300	27693	25966	28106	29337	28300	45262	47168	44147	44813	45708	91713	91034	95987	92874	92212	139196	137649	140853	137289	138820	187040	182368	187021	184670	185211		1300	1071	1157	1157	1275	1203	1640	1722	1760	1613	1905	3752	3424	3564	3578	4010	5347	5523	6047	5827	5600	7640	7373
1301	27788	26063	28219	29432	28410	45413	47345	44315	44982	45870	92051	91359	96362	93208	92546	139725	138163	141364	137778	139341	187742	183048	187768	185336	185891		1301	1077	1168	1161	1276	1205	1640	1727	1762	1616	1904	3765	3426	3565	3582	4014	5359	5529	6061	5827	5612	7657	7390
1302	27886	26170	28327	29544	28537	45567	47529	44479	45137	46018	92405	91692	96701	93536	92884	140216	138689	141899	138285	139828	188444	183717	188471	186044	186636		1302	1078	1170	1162	1276	1206	1646	1730	1765	1618	1905	3771	3436	3572	3587	4031	5369	5541	6074	5844	5624	7674	7414
1303	27984	26274	28443	29654	28659	45706	47689	44653	45295	46179	92725	92008	97052	93876	93231	140696	139230	142487	138811	140360	189151	184388	189166	186748	187358		1303	1081	1175	1164	1281	1213	1647	1733	1771	1621	1913	3780	3447	3574	3596	4042	5385	5548	6086	5860	5630	7686	7427
1304	28062	26358	28556	29778	28775	45883	47870	44827	45462	46364	93081	92346	97411	94235	93615	141199	139747	143014	139305	140902	189869	185081	189874	187436	188087		1304	1083	1177	1165	1283	1216	1648	1739	1779	1623	1915	3788	3453	3576	3606	4058	5406	5554	6090	5881	5646	7700	7450
1305	28159	26456	28661	29895	28870	46044	48055	45001	45616	46531	93398	92681	97781	94585	93946	141729	140272	143576	139818	141387	190589	185791	190602	188166	188763		1305	1090	1180	1168	1289	1226	1649	1739	1780	1629	1918	3794	3463	3581	3613	4064	5417	5575	6101	5890	5664	7721	7471
1306	28263	26551	28763	30012	28974	46209	48247	45173	45803	46723	93780	93033	98151	94964	94269	142249	140822	144118	140345	141908	191292	186468	191327	188847	189496		1306	1092	1183	1170	1292	1230	1650	1744	1782	1630	1922	3801	3468	3592	3625	4069	5427	5586	6110	5897	5672	7734	7480
1307	28352	26644	28862	30131	29085	46378	48441	45343	45962	46888	94124	93392	98524	95317	94625	142755	141353	144698	140858	142456	192000	187175	192025	189520	190181		1307	1099	1184	1171	1294	1232	1655	1751	1784	1637	1933	3802	3478	3602	3635	4079	5438	5602	6124	5900	5695	7757	7491
1308	28448	26729	28984	30244	29192	46532	48623	45516	46152	47082	94454	93744	98863	95638	94980	143243	141900	145254	141395	142958	192703	187862	192781	190183	190896		1308	1104	1184	1172	1300	1232	1661	1750	1795	1640	1935	3816	3481	3611	3635	4090	5443	5617	6132	5911	5704	7761	7506
1309	28555	26824	29091	30363	29294	46706	48798	45692	46308	47275	94808	94115	99221	96014	95360	143772	142438	145795	141918	143461	193462	188603	193435	190847	191614		1309	1105	1191	1172	1304	1233	1665	1754	1802	1646	1940	3824	3486	3632	3643	4090	5450	5637	6158	5917	5710	7782	7520
1310	28687	26939	29204	30473	29375	46870	48979	45871	46484	47453	95164	94464	99595	96405	95671	144329	142995	146349	142466	143985	194204	189333	194153	191545	192317		1310	1105	1192	1176	1306	1239	1669	1759	1809	1649	1942	3832	3495	3641	3647	4093	5463	5654	6162	5920	5732	7801	7528
1311	28782	27008	29313	30595	29491	47076	49146	46033	46659	47642	95503	94872	99965	96757	96008	144844	143536	146846	142979	144500	194899	190041	194847	192238	192969		1311	1109	1193	1179	1307	1240	1671	1767	1809	1653	1943	3841	3499	3648	3652	4098	5473	5673	6174	5926	5738	7819	7545
1312	28875	27121	29403	30706	29622	47254	49309	46211	46830	47811	95841	95213	100324	97137	96349	145421	144071	147402	143521	145036	195622	190714	195598	192885	193729		1312	1109	1195	1179	1309	1244	1672	1773	1818	1655	1947	3851	3507	3656	3664	4105	5480	5690	6189	5940	5747	7843	7559
1313	28983	27267	29520	30811	29749	47431	49501	46395	47008	48002	96195	95572	100657	97506	96697	145939	144632	147965	144065	145581	196364	191442	196332	193601	194423		1313	1110	1196	1182	1309	1248	1678	1784	1821	1655	1950	3873	3518	3660	3675	4117	5497	5694	6199	5958	5758	7866	7585
1314	29124	27379	29644	30938	29884	47613	49693	46576	47173	48180	96550	95926	101035	97887	97097	146501	145182	148507	144556	146101	197063	192149	197044	194293	195119		1314	1111	1204	1183	1310	1251	1680	1798	1825	1655	1956	3886	3523	3660	3677	4124	5511	5706	6207	5973	5775	7879	7602
1315	29227	27473	29758	31043	29997	47789	49859	46750	47333	48360	96862	96282	101401	98260	97456	147030	145741	149091	145120	146639	197800	192865	197739	195034	195827		1315	1111	1205	1184	1314	1256	1689	1800	1831	1662	1957	3892	3533	3663	3678	4129	5522	5717	6218	5984	5787	7904	7616
1316	29319	27572	29869	31183	30097	47983	50054	46927	47502	48523	97256	96660	101785	98594	97819	147547	146328	149666	145672	147200	198525	193566	198495	195717	196543		1316	1115	1206	1189	1317	1260	1692	1802	1832	1668	1962	3904	3543	3673	3687	4141	5534	5731	6233	6004	5816	7914	7636
1317	29439	27661	29993	31277	30222	48150	50266	47097	47676	48698	97630	97003	102183	98987	98180	148075	146845	150161	146218	147759	199277	194302	199153	196466	197246		1317	1119	1206	1192	1317	1272	1694	1801	1840	1682	1967	3910	3552	3680	3700	4147	5542	5738	6250	6016	5835	7932	7654
1318	29550	27769	30105	31379	30334	48303	50423	47250	47853	48897	97975	97387	102577	99352	98484	148614	147419	150726	146783	148332	200071	195053	199898	197188	197953		1318	1122	1207	1195	1317	1272	1698	1804	1843	1683	1967	3914	3560	3684	3709	4149	5549	5744	6262	6036	5839	7945	7684
1319	29669	27873	30224	31496	30458	48504	50637	47422	48032	49055	98332	97739	102956	99710	98833	149171	148005	151277	147354	148848	200810	195818	200652	197942	198667		1319	1124	1209	1197	1322	1275	1700	1808	1845	1689	1970	3923	3570	3689	3713	4157	5562	5750	6279	6057	5846	7965	7699
1320	29780	27994	30329	31606	30573	48671	50821	47626	48214	49237	98723	98065	103368	100086	99211	149736	148534	151849	147938	149396	201530	196594	201384	198683	199435		1320	1125	1209	1199	1324	1276	1701	1808	1854	1693	1975	3926	3577	3694	3713	4161	5576	5768	6286	6067	5868	7982	7711
1321	29894	28105	30444	31745	30681	48819	51031	47808	48407	49405	99097	98442	103736	100432	99547	150326	149089	152418	148509	149981	202249	197369	202162	199420	200145		1321	1126	1209	1201	1326	1282	1706	1813	1852	1693	1981	3938	3585	3706	3721	4180	5597	5787	6292	6074	5877	8003	7737
1322	30003	28200	30556	31868	30785	48990	51222	47991	48605	49589	99506	98830	104131	100792	99916	150913	149655	153032	149042	150572	203048	198104	202881	200137	200905		1322	1126	1214	1209	1333	1283	1709	1814	1858	1694	1982	3949	3591	3710	3740	4187	5619	5802	6309	6087	5885	8011	7743
1323	30125	28302	30701	31989	30896	49149	51410	48167	48767	49785	99894	99250	104553	101155	100260	151490	150184	153621	149569	151167	203809	198800	203635	200878	201621		1323	1128	1215	1212	1336	1284	1712	1822	1857	1698	1991	3959	3600	3719	3747	4199	5624	5818	6319	6098	5897	8032	7764
1324	30248	28417	30827	32107	31007	49347	51599	48344	48945	49962	100243	99587	104990	101530	100626	152058	150749	154132	150094	151753	204557	199514	204401	201645	202378		1324	1129	1219	1212	1340	1287	1713	1829	1860	1701	1997	3962	3610	3723	3756	4207	5630	5827	6334	6112	5900	8045	7775
1325	30346	28527	30959	32232	31118	49540	51790	48529	49110	50137	100627	99985	105380	101913	101021	152599	151328	154691	150637	152337	205289	200327	205158	202434	203144		1325	1131	1221	1214	1344	1290	1719	1834	1866	1705	2001	3965	3624	3730	3761	4214	5644	5841	6346	6130	5910	8059	7791
1326	30459	28636	31047	32360	31240	49708	52004	48694	49306	50297	101031	100338	105771	102271	101392	153189	151874	155279	151161	152911	206035	201110	205928	203114	203905		1326	1133	1221	1215	1347	1292	1722	1835	1870	1706	2006	3972	3628	3737	3765	4220	5652	5859	6357	6150	5921	8072	7804
1327	30548	28731	31170	32472	31361	49884	52213	48887	49470	50466	101428	100713	106160	102618	101750	153829	152395	155892	151744	153483	206809	201845	206663	203908	204619		1327	1136	1222	1222	1355	1295	1722	1839	1873	1705	2010	3980	3638	3753	3775	4230	5662	5864	6367	6164	5937	8080	7820
1328	30662	28825	31295	32610	31473	50059	52394	49074	49656	50669	101801	101088	106544	102955	102140	154366	152919	156454	152328	154074	207576	202641	207432	204682	205357		1328	1139	1221	1235	1361	1295	1733	1845	1877	1705	2013	3984	3644	3761	3787	4239	5681	5880	6382	6174	5953	8102	7832
1329	30786	28915	31411	32737	31596	50220	52572	49281	49840	50863	102201	101470	106947	103358	102504	154903	153487	157004	152892	154666	208354	203409	208191	205468	206135		1329	1139	1222	1234	1365	1299	1732	1851	1879	1708	2022	3992	3662	3768	3793	4243	5693	5891	6396	6182	5971	8124	7844
1330	30902	29015	31523	32882	31713	50420	52758	49463	50022	51043	102568	101863	107340	103770	102883	155491	154061	157624	153460	155237	209075	204163	208967	206258	206961		1330	1141	1225	1240	1362	1303	1734	1853	1887	1710	2029	3998	3669	3783	3801	4247	5709	5911	6418	6211	5978	8140	7851
1331	31030	29126	31644	33018	31834	50616	52958	49641	50204	51211	102916	102252	107728	104157	103288	156078	154611	158262	154013	155748	209880	204956	209689	207055	207739		1331	1145	1227	1242	1364	1307	1735	1853	1898	1712	2033	4011	3680	3805	3807	4258	5724	5929	6435	6249	5991	8156	7867
1332	31142	29226	31738	33148	31945	50805	53154	49823	50407	51403	103292	102613	108130	104554	103683	156649	155176	158852	154583	156289	210649	205662	210449	207852	208531		1332	1145	1228	1245	1366	1311	1737	1861	1901	1720	2033	4024	3686	3812	3820	4263	5732	5951	6446	6269	6001	8182	7886
1333	31260	29312	31869	33266	32050	51019	53363	50000	50615	51620	103684	102978	108517	104890	104100	157274	155751	159431	155144	156888	211451	206408	211245	208628	209294		1333	1147	1230	1251	1366	1312	1739	1866	1905	1724	2037	4034	3692	3820	3827	4278	5739	5962	6456	6283	6011	8210	7900
1334	31374	29415	31992	33396	32168	51221	53571	50192	50807	51820	104066	103341	108917	105282	104466	157857	156337	160037	155700	157492	212281	207126	211995	209365	210085		1334	1147	1231	1257	1367	1314	1740	1870	1913	1728	2042	4045	3701	3831	3840	4289	5748	5979	6463	6289	6028	8222	7920
1335	31479	29524	32118	33525	32297	51421	53743	50371	50997	52024	104449	103678	109310	105680	104881	158456	156924	160647	156244	158068	213025	207865	212760	210133	210911		1335	1151	1234	1259	1377	1320	1742	1875	1926	1730	2045	4049	3709	3840	3842	4302	5759	5990	6483	6299	6044	8236	7936
1336	31601	29653	32231	33639	32423	51622	53944	50551	51181	52221	104804	104089	109722	106036	105270	159061	157510	161270	156804	158620	213798	208656	213527	210916	211695		1336	1154	1242	1262	1380	1321	1744	1876	1928	1734	2054	4058	3717	3850	3849	4313	5782	6002	6502	6308	6063	8272	7950
1337	31743	29775	32343	33769	32540	51804	54144	50721	51373	52427	105200	104479	110132	106401	105693	159670	158069	161870	157328	159234	214577	209438	214326	211675	212462		1337	1155	1244	1266	1383	1326	1745	1891	1933	1739	2054	4069	3721	3860	3857	4329	5786	6020	6522	6322	6086	8288	7962
1338	31847	29870	32481	33895	32663	52008	54367	50880	51541	52617	105605	104892	110533	106795	106099	160261	158649	162458	157881	159840	215369	210256	215142	212488	213160		1338	1162	1251	1270	1385	1328	1745	1894	1939	1741	2059	4070	3732	3869	3858	4335	5793	6026	6536	6340	6093	8309	7986
1339	31944	29983	32627	34014	32795	52213	54571	51083	51731	52809	105987	105304	110948	107201	106470	160852	159244	163020	158439	160424	216174	211027	215920	213245	213918		1339	1166	1252	1270	1394	1332	1750	1901	1941	1744	2068	4077	3745	3875	3862	4353	5820	6044	6550	6351	6100	8323	8010
1340	32066	30084	32746	34133	32924	52434	54766	51266	51911	52999	106356	105703	111338	107604	106907	161459	159828	163632	159030	161012	216913	211826	216720	214038	214726		1340	1168	1254	1271	1402	1334	1755	1906	1944	1753	2073	4085	3748	3889	3873	4364	5833	6053	6557	6358	6104	8338	8033
1341	32188	30185	32881	34260	33044	52642	54995	51427	52097	53205	106745	106101	111763	108031	107285	162036	160466	164220	159639	161570	217702	212592	217556	214844	215597		1341	1171	1255	1273	1407	1337	1758	1910	1953	1755	2076	4097	3755	3903	3885	4379	5841	6070	6565	6371	6115	8349	8043
1342	32315	30300	33007	34375	33167	52821	55199	51648	52284	53394	107117	106465	112142	108460	107661	162669	161067	164840	160228	162184	218522	213358	218372	215615	216410		1342	1175	1258	1276	1414	1340	1763	1912	1953	1765	2077	4101	3765	3912	3889	4387	5856	6093	6590	6385	6137	8376	8059
1343	32442	30416	33114	34505	33276	53033	55377	51849	52476	53602	107490	106835	112510	108851	108059	163278	161659	165441	160855	162773	219355	214168	219192	216388	217209		1343	1182	1262	1280	1415	1340	1771	1912	1963	1770	2082	4106	3775	3919	3901	4395	5871	6100	6605	6399	6146	8392	8071
1344	32567	30530	33220	34650	33406	53233	55561	52033	52671	53798	107875	107236	112905	109227	108496	163865	162291	166085	161452	163362	220132	214985	220028	217236	218006		1344	1183	1264	1283	1414	1341	1775	1913	1968	1778	2088	4111	3780	3931	3911	4402	5887	6109	6624	6408	6164	8412	8082
1345	32681	30613	33353	34785	33517	53436	55814	52214	52851	54019	108307	107658	113335	109641	108907	164477	162876	166759	162049	164008	221013	215772	220861	217981	218802		1345	1189	1270	1285	1418	1346	1782	1915	1972	1778	2092	4124	3797	3939	3914	4408	5890	6121	6635	6418	6171	8427	8102
1346	32821	30717	33484	34903	33624	53634	56013	52411	53052	54222	108709	108061	113763	110077	109292	165064	163477	167411	162693	164621	221830	216545	221671	218829	219620		1346	1189	1275	1289	1419	1349	1788	1916	1973	1779	2096	4134	3802	3948	3914	4413	5903	6137	6660	6423	6180	8457	8116
1347	32947	30823	33602	35028	33757	53815	56212	52613	53272	54404	109135	108503	114174	110489	109695	165712	164052	168006	163332	165197	222668	217371	222500	219633	220446		1347	1191	1277	1298	1423	1353	1798	1928	1981	1782	2096	4145	3805	3955	3920	4426	5919	6141	6674	6439	6200	8472	8140
1348	33056	30930	33713	35171	33881	54008	56421	52784	53481	54622	109548	108872	114623	110875	110126	166291	164724	168632	163960	165804	223469	218209	223313	220460	221283		1348	1193	1282	1301	1425	1354	1803	1933	1993	1782	2099	4150	3814	3965	3927	4440	5927	6156	6695	6451	6226	8489	8164
1349	33172	31037	33851	35297	34004	54235	56629	53003	53689	54812	109976	109268	115048	111304	110515	166906	165358	169274	164567	166457	224287	219009	224159	221290	222071		1349	1193	1292	1300	1425	1357	1806	1935	1995	1788	2101	4161	3818	3972	3934	4450	5941	6165	6715	6467	6246	8502	8195
1350	33308	31162	34004	35409	34108	54439	56860	53200	53896	55001	110388	109684	115447	111720	110956	167535	165939	169912	165183	167097	225134	219838	225019	222100	222920		1350	1193	1293	1304	1428	1358	1806	1940	1998	1790	2102	4169	3836	3974	3942	4459	5955	6171	6732	6477	6273	8522	8212
1351	33428	31294	34149	35540	34235	54657	57063	53405	54094	55207	110786	110112	115881	112168	111395	168177	166553	170581	165800	167675	226011	220643	225843	222913	223770		1351	1194	1294	1311	1432	1359	1809	1945	2002	1791	2104	4175	3847	3985	3945	4469	5969	6189	6741	6493	6286	8542	8227
1352	33533	31424	34263	35697	34361	54863	57287	53622	54291	55381	111186	110516	116280	112578	111787	168791	167174	171222	166437	168308	226846	221499	226697	223693	224581		1352	1198	1295	1315	1434	1366	1815	1947	2004	1794	2109	4180	3862	3985	3960	4481	5982	6197	6758	6503	6302	8563	8249
1353	33668	31542	34395	35839	34482	55079	57512	53818	54509	55596	111610	110935	116740	113006	112176	169418	167798	171885	167025	168946	227685	222318	227586	224512	225394		1353	1197	1296	1320	1436	1369	1816	1961	2011	1794	2112	4187	3873	3990	3969	4487	5989	6208	6777	6514	6314	8595	8269
1354	33791	31664	34539	35981	34629	55279	57732	54021	54712	55838	112008	111329	117149	113427	112599	170056	168451	172514	167665	169542	228551	223130	228429	225341	226231		1354	1197	1299	1323	1438	1373	1820	1966	2016	1800	2115	4197	3880	3998	3976	4496	6003	6227	6792	6522	6329	8609	8291
1355	33919	31780	34657	36098	34751	55462	57970	54230	54897	56028	112416	111690	117562	113811	113031	170703	169052	173111	168276	170182	229349	223991	229281	226174	227054		1355	1202	1301	1325	1443	1375	1824	1973	2019	1802	2117	4204	3890	4000	3986	4508	6008	6249	6814	6527	6340	8617	8309
1356	34042	31885	34782	36226	34879	55684	58161	54413	55115	56268	112843	112101	117994	114239	113508	171330	169645	173786	168892	170789	230250	224838	230173	227053	227899		1356	1208	1305	1324	1447	1382	1826	1975	2020	1806	2122	4207	3900	4006	3984	4532	6038	6265	6827	6538	6355	8637	8339
1357	34172	31995	34891	36361	35009	55897	58364	54612	55315	56480	113228	112507	118404	114645	113918	172012	170286	174464	169502	171401	231059	225667	231030	227912	228746		1357	1214	1306	1325	1453	1383	1833	1976	2024	1806	2124	4219	3911	4016	3996	4540	6042	6267	6831	6560	6374	8656	8356
1358	34320	32130	34996	36468	35133	56082	58575	54827	55518	56667	113629	112916	118841	115068	114361	172652	170885	175103	170163	172027	231875	226564	231833	228785	229584		1358	1214	1306	1331	1461	1383	1835	1975	2025	1810	2135	4223	3911	4022	4004	4550	6051	6281	6840	6572	6386	8683	8370
1359	34453	32238	35128	36590	35275	56291	58783	55048	55742	56858	114033	113354	119252	115468	114832	173252	171488	175771	170790	172669	232788	227430	232702	229672	230476		1359	1216	1310	1332	1465	1384	1838	1980	2026	1809	2139	4233	3916	4037	4019	4556	6064	6302	6854	6588	6395	8712	8385
1360	34563	32349	35253	36746	35403	56492	58988	55229	55964	57042	114482	113764	119652	115874	115238	173841	172109	176403	171452	173329	233621	228295	233534	230528	231357		1360	1216	1312	1335	1466	1386	1849	1981	2028	1818	2139	4245	3926	4041	4026	4572	6079	6312	6872	6618	6403	8738	8399
1361	34692	32463	35377	36857	35546	56703	59214	55420	56178	57260	114864	114180	120133	116333	115653	174505	172754	177080	172141	173989	234480	229142	234444	231377	232219		1361	1217	1317	1337	1467	1392	1852	1985	2030	1827	2153	4254	3933	4045	4039	4575	6085	6339	6885	6645	6424	8760	8412
1362	34848	32573	35519	36978	35677	56917	59449	55629	56395	57472	115296	114590	120572	116779	116126	175159	173403	177736	172792	174576	235381	229991	235309	232259	233047		1362	1219	1323	1337	1468	1396	1862	1986	2035	1835	2153	4262	3939	4053	4054	4577	6101	6356	6904	6653	6448	8782	8428
1363	34994	32687	35632	37109	35806	57131	59673	55847	56590	57693	115722	114999	121015	117223	116545	175790	174034	178399	173459	175205	236212	230853	236204	233159	233968		1363	1221	1324	1345	1468	1396	1867	1989	2039	1834	2153	4270	3939	4061	4065	4589	6118	6363	6919	6656	6474	8802	8446
1364	35141	32815	35774	37264	35936	57329	59931	56065	56811	57896	116149	115419	121460	117643	116968	176424	174693	179089	174136	175832	237140	231714	237075	234096	234872		1364	1223	1324	1345	1474	1395	1869	1994	2042	1837	2158	4280	3954	4063	4074	4597	6135	6375	6926	6664	6482	8824	8461
1365	35270	32934	35895	37381	36044	57551	60135	56253	57002	58113	116587	115809	121896	118109	117386	177073	175386	179756	174733	176530	238003	232570	237950	234916	235776		1365	1226	1326	1347	1474	1399	1870	2000	2044	1839	2160	4289	3962	4074	4082	4601	6152	6391	6952	6685	6495	8848	8471
1366	35392	33069	36015	37520	36203	57716	60346	56456	57209	58339	117007	116270	122379	118516	117796	177731	176071	180425	175411	177211	238866	233400	238884	235727	236596		1366	1228	1334	1345	1475	1400	1876	2003	2046	1841	2161	4298	3981	4080	4093	4609	6171	6409	6966	6710	6498	8865	8497
1367	35537	33190	36153	37639	36323	57934	60551	56646	57431	58538	117471	116697	122811	118962	118209	178399	176742	181115	176078	177898	239771	234242	239727	236598	237448		1367	1230	1336	1347	1478	1404	1876	2004	2049	1842	2165	4300	3990	4095	4103	4625	6187	6428	6978	6725	6512	8897	8517
1368	35668	33310	36280	37785	36446	58151	60788	56837	57673	58753	117945	117132	123264	119418	118662	179070	177394	181806	176756	178572	240653	235164	240648	237501	238317		1368	1230	1339	1347	1482	1405	1880	2006	2049	1843	2166	4308	4000	4106	4106	4644	6206	6437	6995	6758	6523	8914	8534
1369	35815	33433	36407	37919	36589	58378	61036	57046	57889	58976	118400	117546	123739	119870	119098	179773	178006	182513	177410	179225	241554	236059	241574	238356	239209		1369	1230	1341	1354	1482	1408	1880	2008	2047	1848	2174	4319	4009	4114	4111	4662	6215	6461	7006	6764	6538	8929	8549
1370	35961	33564	36543	38039	36744	58598	61247	57249	58106	59195	118851	117965	124201	120324	119527	180464	178648	183204	178101	179899	242450	236947	242500	239223	240086		1370	1236	1341	1358	1481	1412	1893	2013	2050	1852	2175	4327	4017	4124	4118	4685	6223	6469	7038	6779	6547	8943	8571
1371	36101	33693	36681	38191	36890	58851	61468	57454	58313	59419	119278	118436	124690	120775	119950	181113	179343	183866	178776	180554	243385	237792	243416	240153	240997		1371	1240	1345	1365	1482	1413	1894	2021	2055	1859	2182	4345	4031	4137	4131	4690	6237	6484	7044	6789	6557	8960	8576
1372	36225	33824	36794	38351	37024	59082	61696	57665	58535	59651	119678	118885	125154	121272	120405	181823	180025	184546	179440	181234	244236	238653	244322	241015	241849		1372	1240	1346	1365	1486	1414	1893	2025	2056	1864	2191	4355	4035	4143	4136	4705	6247	6504	7056	6805	6574	8970	8591
1373	36365	33955	36922	38496	37157	59293	61922	57891	58732	59863	120171	119296	125661	121779	120834	182456	180664	185266	180113	181905	245195	239513	245238	241875	242772		1373	1244	1356	1369	1494	1416	1895	2028	2057	1868	2194	4362	4046	4159	4142	4711	6253	6508	7071	6815	6592	8985	8602
1374	36521	34054	37065	38660	37272	59519	62152	58091	58944	60100	120652	119761	126103	122231	121306	183168	181365	185987	180791	182602	246079	240441	246132	242780	243696		1374	1246	1358	1369	1495	1423	1897	2034	2059	1871	2197	4379	4053	4171	4157	4728	6272	6523	7086	6833	6596	9003	8623
1375	36668	34177	37200	38792	37438	59774	62381	58302	59155	60346	121085	120226	126595	122691	121761	183871	182033	186694	181387	183288	247023	241369	247019	243693	244664		1375	1248	1369	1371	1501	1428	1900	2035	2063	1878	2203	4387	4080	4181	4174	4730	6284	6535	7100	6850	6620	9021	8642
1376	36803	34295	37360	38947	37586	60001	62649	58533	59365	60596	121496	120670	127072	123140	122242	184522	182695	187418	182067	183967	247960	242219	247915	244634	245581		1376	1249	1369	1371	1504	1429	1911	2040	2065	1879	2214	4398	4096	4194	4182	4738	6290	6545	7113	6857	6628	9044	8659
1377	36950	34410	37515	39114	37729	60205	62872	58742	59620	60801	121904	121088	127555	123590	122745	185183	183361	188103	182731	184656	248894	243114	248809	245554	246512		1377	1254	1371	1389	1507	1436	1910	2049	2066	1879	2216	4404	4108	4197	4190	4749	6308	6562	7141	6873	6652	9064	8683
1378	37082	34538	37668	39261	37880	60418	63120	58964	59881	61016	122344	121528	128016	124034	123193	185839	184043	188797	183411	185359	249784	243953	249757	246430	247419		1378	1254	1372	1392	1515	1438	1921	2052	2075	1889	2222	4407	4110	4201	4197	4760	6328	6580	7156	6881	6677	9078	8715
1379	37217	34660	37861	39403	37998	60627	63339	59203	60095	61242	122817	121981	128488	124490	123680	186531	184687	189516	184129	186048	250698	244880	250649	247330	248345		1379	1257	1373	1404	1519	1443	1925	2054	2078	1901	2228	4414	4118	4209	4211	4765	6350	6592	7189	6891	6688	9092	8726
1380	37347	34765	38005	39549	38147	60875	63590	59455	60298	61474	123271	122453	128918	125005	124111	187202	185379	190236	184811	186828	251578	245768	251578	248268	249230		1380	1259	1374	1405	1522	1443	1933	2058	2084	1905	2232	4420	4131	4212	4214	4772	6365	6605	7205	6898	6699	9112	8738
1381	37483	34891	38148	39737	38293	61073	63847	59690	60515	61706	123738	122933	129364	125465	124530	187886	186067	190986	185555	187567	252547	246684	252531	249219	250177		1381	1265	1375	1406	1524	1445	1937	2062	2087	1908	2249	4426	4139	4229	4215	4786	6379	6609	7217	6912	6714	9138	8752
1382	37622	35017	38274	39883	38416	61304	64067	59893	60744	61963	124217	123396	129843	125929	125027	188608	186790	191691	186228	188306	253517	247567	253497	250124	251118		1382	1264	1376	1410	1533	1455	1944	2075	2095	1914	2253	4433	4149	4239	4219	4804	6397	6627	7231	6930	6727	9155	8770
1383	37765	35148	38422	40011	38591	61529	64322	60106	60988	62207	124701	123857	130287	126424	125483	189277	187502	192376	186948	189016	254527	248511	254395	250998	252130		1383	1264	1385	1414	1538	1455	1951	2080	2102	1921	2253	4443	4156	4244	4223	4812	6408	6646	7243	6946	6745	9175	8783
1384	37923	35264	38553	40147	38724	61760	64585	60345	61226	62412	125185	124330	130758	126907	125952	189986	188197	193064	187667	189741	255420	249405	255331	251898	253030		1384	1264	1392	1416	1537	1457	1958	2087	2104	1926	2257	4454	4165	4253	4228	4825	6427	6655	7262	6957	6758	9205	8808
1385	38078	35381	38707	40288	38875	62018	64818	60576	61445	62649	125655	124799	131286	127390	126428	190681	188892	193739	188365	190496	256336	250301	256253	252788	253978		1385	1266	1399	1420	1546	1458	1960	2092	2104	1929	2260	4468	4184	4260	4235	4831	6432	6664	7266	6977	6784	9228	8817
1386	38220	35536	38837	40431	39055	62249	65045	60828	61694	62904	126091	125313	131761	127876	126886	191351	189598	194450	189070	191244	257261	251254	257176	253688	254928		1386	1265	1398	1426	1550	1461	1960	2102	2106	1931	2262	4475	4200	4272	4236	4847	6447	6676	7279	6989	6802	9244	8844
1387	38362	35672	38987	40568	39192	62492	65294	61077	61924	63122	126565	125778	132238	128388	127356	192091	190287	195175	189753	191941	258176	252189	258152	254655	255915		1387	1271	1408	1427	1552	1467	1963	2099	2105	1942	2263	4479	4202	4285	4266	4846	6459	6692	7300	6998	6816	9253	8858
1388	38508	35801	39115	40704	39337	62735	65496	61296	62140	63346	127011	126275	132731	128876	127849	192798	190982	195877	190396	192629	259099	253139	259094	255639	256902		1388	1272	1409	1427	1553	1468	1965	2108	2111	1944	2265	4486	4229	4297	4281	4853	6462	6704	7336	7006	6831	9273	8889
1389	38646	35949	39262	40868	39487	62956	65732	61522	62367	63566	127531	126751	133229	129375	128340	193517	191713	196557	191130	193320	260072	254092	260046	256577	257858		1389	1279	1413	1429	1557	1469	1968	2113	2114	1953	2265	4495	4235	4308	4288	4859	6472	6722	7354	7017	6841	9296	8910
1390	38800	36088	39408	41012	39640	63169	65979	61728	62602	63804	128008	127204	133719	129847	128875	194207	192415	197251	191857	194078	261055	255045	261055	257511	258796		1390	1284	1415	1431	1559	1473	1970	2119	2123	1958	2268	4502	4240	4320	4289	4870	6493	6748	7362	7032	6854	9330	8920
1391	38942	36229	39558	41190	39791	63403	66227	61992	62848	63999	128455	127640	134197	130344	129375	194947	193129	197950	192578	194799	262035	255950	262067	258450	259788		1391	1286	1417	1433	1567	1483	1972	2121	2123	1960	2279	4511	4256	4347	4296	4895	6507	6764	7381	7053	6872	9351	8946
1392	39096	36368	39707	41349	39915	63641	66488	62247	63090	64218	128908	128099	134695	130818	129840	195716	193891	198702	193291	195514	262999	256926	263031	259382	260795		1392	1296	1419	1435	1572	1483	1974	2122	2125	1963	2284	4520	4271	4359	4304	4897	6523	6778	7402	7065	6898	9368	8974
1393	39236	36506	39836	41516	40076	63862	66708	62502	63312	64464	129365	128597	135184	131290	130355	196420	194660	199430	193998	196238	264022	257828	263973	260351	261806		1393	1303	1424	1439	1575	1483	1979	2131	2128	1967	2284	4527	4276	4364	4320	4905	6539	6794	7420	7078	6909	9400	8989
1394	39391	36629	40002	41668	40224	64121	66960	62745	63549	64677	129825	129126	135725	131786	130826	197195	195388	200130	194681	196921	264956	258792	264939	261317	262802		1394	1307	1430	1441	1578	1483	1983	2136	2130	1975	2296	4545	4277	4373	4328	4922	6554	6801	7431	7098	6919	9414	9003
1395	39546	36778	40139	41809	40362	64345	67200	62973	63783	64897	130301	129639	136298	132222	131326	197895	196156	200843	195361	197672	265976	259791	265860	262378	263804		1395	1309	1430	1444	1580	1487	1986	2139	2134	1989	2301	4553	4280	4382	4347	4931	6565	6830	7450	7115	6935	9436	9036
1396	39695	36898	40284	41975	40534	64599	67447	63180	64024	65140	130775	130077	136757	132714	131815	198660	196930	201639	196127	198467	266927	260729	266874	263325	264802		1396	1311	1435	1444	1580	1489	1999	2143	2136	1992	2309	4570	4294	4388	4354	4941	6576	6849	7460	7139	6946	9449	9059
1397	39829	37053	40429	42143	40687	64840	67685	63428	64278	65370	131258	130568	137284	133216	132316	199357	197694	202348	196863	199228	267935	261763	267852	264304	265872		1397	1313	1439	1450	1591	1496	2005	2148	2141	1996	2314	4576	4300	4397	4357	4956	6587	6860	7470	7164	6967	9470	9066
1398	39989	37196	40577	42295	40818	65052	67899	63667	64518	65628	131765	131020	137851	133688	132764	200109	198427	203030	197622	200000	268898	262740	268886	265328	266896		1398	1315	1439	1457	1591	1501	2007	2154	2151	1998	2318	4601	4316	4399	4362	4972	6604	6872	7488	7176	6987	9503	9101
1399	40147	37342	40719	42469	40978	65293	68143	63897	64785	65874	132263	131492	138366	134179	133269	200864	199217	203801	198337	200735	269922	263725	269881	266364	267841		1399	1317	1437	1457	1600	1506	2007	2157	2153	2004	2321	4605	4330	4404	4370	4983	6617	6884	7499	7189	6998	9523	9110
1400	40288	37490	40874	42625	41115	65533	68392	64146	64999	66132	132735	132011	138861	134657	133786	201668	199934	204614	199060	201489	270940	264708	270884	267343	268819		1400	1320	1439	1460	1604	1510	2017	2161	2157	2009	2327	4612	4337	4410	4381	5005	6633	6900	7521	7210	7011	9542	9131
1401	40448	37669	41018	42798	41272	65787	68654	64388	65225	66394	133238	132506	139372	135154	134288	202363	200650	205358	199817	202247	271934	265653	271833	268356	269787		1401	1321	1445	1460	1605	1515	2027	2165	2166	2013	2328	4626	4346	4423	4386	5019	6646	6909	7538	7225	7023	9568	9153
1402	40607	37804	41177	42975	41422	66056	68927	64631	65465	66624	133746	133031	139895	135692	134783	203069	201406	206118	200581	202980	272918	266633	272875	269303	270757		1402	1324	1448	1463	1611	1518	2028	2171	2174	2019	2334	4630	4353	4438	4399	5034	6651	6927	7549	7241	7044	9585	9178
1403	40726	37953	41356	43120	41546	66304	69170	64895	65738	66866	134247	133537	140373	136173	135258	203808	202196	206852	201361	203737	273938	267653	273831	270303	271756		1403	1330	1451	1464	1617	1525	2030	2171	2193	2024	2339	4635	4361	4455	4414	5038	6667	6947	7578	7253	7060	9603	9213
1404	40866	38102	41527	43299	41716	66571	69426	65133	65995	67134	134748	134033	140897	136745	135751	204567	202928	207621	202149	204510	274963	268588	274859	271345	272768		1404	1334	1456	1467	1619	1528	2031	2174	2201	2033	2346	4643	4374	4459	4425	5050	6675	6964	7597	7272	7069	9624	9239
1405	41005	38253	41669	43457	41857	66797	69705	65386	66264	67390	135219	134528	141458	137222	136262	205355	203704	208393	202916	205275	275997	269609	275916	272361	273738		1405	1336	1459	1470	1623	1532	2037	2179	2202	2039	2351	4660	4377	4470	4434	5060	6684	6974	7615	7292	7086	9636	9253
1406	41172	38399	41833	43618	42003	67030	69977	65618	66487	67640	135749	135030	142019	137778	136767	206138	204470	209151	203672	206030	276978	270631	276918	273373	274745		1406	1338	1459	1477	1623	1537	2042	2180	2205	2036	2356	4674	4384	4478	4445	5065	6687	7004	7625	7297	7097	9660	9261
1407	41323	38567	41991	43782	42171	67268	70203	65871	66735	67880	136243	135526	142578	138250	137254	206885	205268	209901	204463	206802	278016	271565	277981	274364	275726		1407	1345	1461	1478	1625	1538	2045	2183	2209	2040	2363	4687	4390	4489	4457	5075	6702	7028	7642	7321	7106	9676	9291
1408	41479	38711	42165	43965	42355	67515	70486	66083	66983	68085	136769	136023	143083	138767	137750	207639	206018	210688	205233	207573	279038	272501	279028	275410	276749		1408	1350	1461	1481	1628	1538	2046	2185	2215	2042	2367	4701	4397	4496	4466	5082	6713	7038	7657	7330	7124	9696	9304
1409	41635	38863	42329	44138	42526	67760	70758	66335	67235	68338	137325	136547	143600	139266	138231	208425	206800	211486	205985	208335	280102	273558	280105	276467	277771		1409	1349	1461	1484	1635	1542	2051	2188	2219	2042	2366	4723	4408	4506	4474	5091	6728	7056	7679	7349	7136	9711	9329
1410	41783	39012	42467	44293	42671	68034	71007	66574	67479	68572	137836	137063	144162	139793	138738	209155	207585	212232	206768	209173	281144	274622	281141	277487	278857		1410	1352	1466	1487	1638	1547	2058	2194	2221	2051	2377	4727	4423	4517	4480	5100	6750	7069	7693	7367	7149	9727	9363
1411	41978	39148	42622	44466	42841	68249	71274	66821	67714	68835	138356	137560	144712	140315	139252	209935	208286	213008	207541	209974	282195	275677	282203	278509	279821		1411	1354	1468	1496	1647	1549	2062	2201	2233	2053	2390	4736	4430	4530	4488	5117	6764	7072	7704	7370	7162	9745	9382
1412	42133	39308	42792	44635	43017	68506	71522	67061	67977	69060	138867	138078	145245	140813	139746	210683	209105	213815	208330	210714	283257	276686	283201	279557	280852		1412	1361	1471	1499	1647	1566	2068	2213	2240	2056	2398	4747	4449	4538	4491	5126	6792	7086	7724	7385	7171	9757	9412
1413	42294	39443	42945	44809	43170	68736	71837	67300	68194	69324	139363	138583	145802	141355	140277	211492	209838	214659	209059	211511	284345	277743	284211	280589	281905		1413	1361	1473	1499	1655	1567	2073	2214	2242	2059	2398	4752	4465	4550	4502	5129	6804	7106	7735	7398	7187	9789	9436
1414	42474	39592	43091	44974	43333	68979	72117	67525	68440	69571	139903	139098	146376	141924	140796	212301	210589	215451	209863	212329	285411	278810	285307	281632	282944		1414	1362	1474	1511	1655	1567	2074	2217	2244	2064	2403	4760	4476	4558	4521	5139	6833	7132	7760	7409	7205	9812	9448
1415	42627	39735	43246	45132	43463	69244	72381	67787	68682	69845	140434	139623	146933	142460	141365	213055	211412	216271	210631	213143	286507	279827	286406	282658	284037		1415	1363	1480	1513	1659	1567	2084	2220	2253	2071	2405	4773	4493	4568	4529	5148	6854	7141	7793	7426	7210	9832	9475
1416	42796	39879	43412	45294	43648	69501	72672	68023	68955	70132	140925	140160	147513	142982	141900	213846	212197	217103	211475	213963	287590	280814	287466	283720	285099		1416	1373	1479	1513	1660	1573	2085	2229	2258	2079	2418	4790	4501	4588	4535	5167	6861	7156	7801	7450	7228	9860	9485
1417	42958	40013	43592	45463	43795	69764	72972	68255	69196	70410	141441	140701	148053	143519	142451	214603	213003	217914	212261	214789	288668	281825	288521	284790	286133		1417	1373	1480	1515	1668	1582	2091	2235	2260	2086	2425	4811	4517	4598	4551	5195	6885	7177	7814	7471	7247	9877	9529
1418	43120	40175	43743	45646	43947	70006	73272	68505	69433	70688	141967	141220	148620	144029	142990	215476	213782	218722	213054	215586	289740	282846	289641	285834	287215		1418	1377	1484	1522	1677	1586	2097	2236	2262	2091	2433	4826	4523	4608	4563	5207	6899	7184	7833	7502	7268	9887	9562
1419	43273	40321	43913	45790	44114	70269	73569	68741	69709	70987	142495	141750	149161	144607	143558	216290	214576	219521	213855	216398	290880	283844	290713	286867	288303		1419	1379	1489	1527	1687	1588	2100	2247	2271	2094	2438	4836	4537	4626	4588	5220	6913	7191	7857	7514	7289	9917	9588
1420	43424	40479	44061	45973	44283	70546	73869	68994	69971	71237	142971	142295	149709	145118	144101	217113	215342	220379	214638	217214	291972	284957	291778	287920	289373		1420	1381	1494	1529	1688	1588	2102	2253	2279	2096	2441	4839	4562	4634	4603	5225	6925	7212	7863	7531	7311	9932	9600
1421	43597	40625	44229	46148	44435	70816	74138	69223	70214	71515	143525	142868	150263	145640	144606	217871	216165	221200	215417	218067	293042	286042	292922	288974	290421		1421	1386	1496	1535	1688	1592	2107	2256	2283	2095	2446	4850	4568	4640	4612	5248	6937	7219	7882	7557	7327	9940	9617
1422	43747	40760	44360	46338	44623	71091	74399	69507	70471	71766	144085	143394	150817	146225	145147	218690	217017	221957	216207	218890	294071	287190	294034	290040	291532		1422	1393	1503	1543	1700	1595	2110	2260	2287	2098	2453	4856	4571	4650	4624	5255	6951	7227	7897	7569	7345	9962	9629
1423	43922	40913	44512	46502	44779	71382	74678	69758	70748	72024	144636	143931	151403	146736	145710	219474	217871	222827	217009	219680	295220	288256	295124	291128	292650		1423	1396	1505	1546	1701	1596	2118	2264	2297	2102	2457	4874	4573	4665	4644	5260	6967	7245	7930	7590	7370	9998	9648
1424	44059	41054	44674	46700	44950	71622	74945	70018	70994	72313	145172	144471	151948	147294	146232	220275	218709	223634	217824	220450	296368	289308	296142	292219	293714		1424	1400	1505	1548	1703	1594	2125	2273	2299	2111	2460	4888	4577	4671	4655	5269	6985	7253	7949	7602	7387	10021	9660
1425	44214	41222	44849	46872	45112	71895	75224	70285	71243	72583	145715	145005	152491	147850	146781	221113	219534	224471	218584	221289	297529	290443	297223	293293	294804		1425	1401	1507	1554	1707	1596	2129	2275	2306	2116	2464	4893	4584	4681	4659	5288	6998	7263	7955	7623	7412	10040	9683
1426	44394	41364	45018	47052	45287	72121	75510	70542	71531	72864	146259	145516	153076	148396	147327	221998	220332	225299	219423	222154	298559	291524	298321	294489	295882		1426	1402	1508	1560	1710	1609	2130	2281	2313	2123	2473	4895	4591	4703	4666	5301	7022	7271	7971	7633	7434	10065	9697
1427	44553	41517	45166	47206	45465	72394	75768	70788	71810	73155	146787	146105	153626	148969	147873	222813	221143	226035	220294	222937	299713	292589	299474	295601	296935		1427	1414	1510	1566	1716	1612	2130	2282	2315	2123	2477	4910	4623	4706	4672	5319	7038	7287	7984	7648	7459	10096	9716
1428	44702	41646	45323	47373	45625	72646	76024	71063	72083	73429	147337	146693	154162	149467	148378	223621	221980	226880	221128	223769	300817	293683	300628	296689	298040		1428	1418	1511	1569	1718	1616	2130	2289	2318	2129	2485	4926	4637	4719	4677	5333	7051	7307	8002	7665	7487	10115	9742
1429	44894	41797	45479	47541	45822	72915	76332	71325	72356	73728	147912	147258	154712	149984	148934	224437	222804	227731	221920	224577	301939	294771	301769	297822	299132		1429	1418	1522	1569	1722	1617	2135	2296	2326	2134	2488	4942	4643	4727	4685	5347	7082	7314	8029	7685	7501	10143	9759
1430	45054	41960	45659	47700	45977	73198	76599	71602	72631	73976	148511	147823	155319	150547	149473	225348	223644	228591	222783	225353	303100	295942	302860	298977	300234		1430	1419	1527	1570	1727	1618	2140	2303	2332	2149	2493	4945	4652	4731	4703	5365	7099	7330	8058	7692	7517	10167	9787
1431	45221	42113	45823	47866	46153	73465	76880	71866	72917	74251	149083	148387	155923	151092	150040	226190	224481	229461	223580	226159	304256	297017	304038	300124	301343		1431	1426	1537	1570	1729	1618	2145	2313	2334	2157	2502	4956	4665	4737	4716	5384	7111	7353	8070	7721	7534	10192	9832
1432	45403	42295	45990	48053	46322	73778	77161	72153	73166	74541	149675	148967	156527	151661	150586	227015	225325	230314	224415	227076	305477	298129	305216	301274	302505		1432	1427	1539	1579	1735	1623	2149	2315	2338	2166	2513	4959	4667	4761	4734	5398	7126	7370	8080	7743	7551	10220	9845
1433	45565	42457	46162	48225	46510	74042	77462	72427	73449	74807	150251	149546	157137	152210	151121	227869	226175	231112	225258	227948	306619	299276	306399	302400	303667		1433	1431	1540	1579	1744	1631	2151	2325	2346	2167	2517	4977	4677	4768	4733	5410	7135	7389	8103	7758	7583	10249	9871
1434	45735	42598	46330	48409	46668	74293	77765	72693	73713	75084	150819	150114	157737	152861	151653	228684	227009	231981	226158	228753	307715	300355	307505	303556	304803		1434	1438	1546	1582	1759	1639	2156	2327	2351	2175	2518	4986	4686	4770	4749	5419	7149	7412	8122	7780	7599	10276	9883
1435	45898	42752	46511	48584	46855	74568	78057	72961	73993	75376	151408	150669	158334	153435	152259	229522	227782	232875	227013	229590	308843	301468	308675	304678	305974		1435	1444	1548	1586	1761	1641	2159	2327	2351	2178	2532	4998	4686	4776	4764	5447	7166	7424	8138	7802	7621	10306	9911
1436	46055	42903	46683	48759	47038	74841	78330	73241	74247	75655	151937	151221	158882	154014	152874	230374	228651	233785	227878	230503	309977	302645	309850	305810	307130		1436	1444	1551	1586	1767	1644	2161	2330	2364	2183	2541	5009	4689	4780	4773	5451	7179	7436	8151	7823	7639	10333	9916
1437	46216	43073	46844	48927	47216	75156	78592	73497	74506	75944	152512	151769	159448	154594	153459	231271	229528	234661	228684	231364	311100	303798	311033	307021	308213		1437	1456	1555	1589	1769	1647	2163	2329	2371	2187	2547	5015	4692	4784	4775	5460	7194	7460	8171	7847	7652	10355	9941
1438	46393	43246	47022	49125	47398	75450	78913	73781	74772	76274	153071	152310	160079	155163	154048	232065	230421	235481	229573	232199	312299	304986	312178	308176	309380		1438	1466	1558	1592	1772	1651	2166	2335	2376	2192	2556	5038	4705	4806	4786	5473	7211	7476	8198	7862	7660	10376	9979
1439	46548	43424	47190	49298	47600	75720	79229	74082	75042	76557	153633	152925	160697	155750	154662	232950	231288	236365	230454	233027	313432	306071	313343	309310	310535		1439	1466	1559	1594	1772	1657	2171	2339	2382	2201	2566	5048	4718	4819	4795	5481	7227	7510	8213	7881	7677	10396	10003
1440	46714	43562	47354	49455	47785	76015	79514	74342	75294	76863	154195	153473	161294	156327	155234	233797	232118	237245	231292	233832	314583	307154	314473	310435	311690		1440	1472	1572	1597	1772	1662	2177	2345	2386	2202	2569	5057	4722	4830	4813	5502	7238	7537	8236	7902	7690	10424	10025
1441	46874	43711	47526	49626	47981	76260	79823	74608	75599	77152	154781	154048	161917	156917	155789	234702	233001	238114	232164	234746	315807	308303	315606	311631	312901		1441	1473	1572	1599	1775	1665	2177	2347	2395	2206	2577	5074	4731	4853	4828	5526	7253	7556	8259	7920	7699	10442	10056
1442	47070	43868	47717	49804	48141	76558	80159	74864	75900	77456	155333	154651	162496	157529	156390	235611	233887	238951	233050	235609	317023	309437	316731	312804	314102		1442	1480	1573	1603	1784	1666	2184	2353	2402	2215	2584	5092	4741	4866	4839	5545	7273	7569	8279	7940	7714	10456	10075
1443	47249	44042	47916	49988	48334	76850	80447	75146	76169	77703	155887	155184	163134	158111	156989	236536	234730	239844	233880	236507	318193	310603	317977	313942	315270		1443	1492	1578	1609	1786	1667	2188	2354	2403	2214	2589	5107	4750	4876	4846	5550	7296	7583	8293	7954	7735	10477	10097
1444	47424	44207	48083	50194	48533	77142	80775	75442	76460	77992	156482	155788	163729	158680	157558	237428	235573	240740	234721	237351	319412	311769	319121	315038	316404		1444	1491	1583	1611	1791	1670	2191	2361	2406	2218	2591	5110	4761	4892	4864	5567	7316	7603	8307	7967	7748	10502	10121
1445	47601	44374	48226	50368	48735	77422	81097	75706	76725	78305	157075	156390	164311	159307	158096	238384	236465	241615	235578	238254	320672	312920	320321	316187	317622		1445	1492	1582	1618	1792	1673	2194	2362	2410	2224	2603	5121	4770	4901	4877	5577	7336	7613	8331	7983	7769	10532	10138
1446	47756	44524	48422	50553	48903	77694	81396	76010	76990	78578	157624	156998	164917	159874	158716	239302	237339	242522	236522	239129	321803	314041	321515	317319	318819		1446	1490	1585	1621	1800	1677	2197	2365	2408	2228	2617	5130	4780	4915	4894	5582	7350	7628	8359	7998	7781	10558	10162
1447	47934	44713	48598	50738	49087	77985	81682	76304	77288	78865	158221	157619	165488	160458	159267	240217	238204	243431	237436	240029	322945	315218	322703	318463	319995		1447	1492	1594	1622	1803	1691	2205	2370	2417	2227	2628	5137	4791	4919	4898	5592	7369	7662	8386	8023	7802	10591	10186
1448	48130	44875	48778	50929	49265	78283	81962	76578	77571	79159	158809	158182	166059	161024	159886	241055	239153	244365	238347	240941	324119	316355	323943	319595	321217		1448	1499	1594	1624	1804	1692	2210	2373	2419	2232	2629	5148	4799	4936	4918	5596	7387	7684	8421	8049	7836	10617	10211
1449	48293	45048	48954	51118	49454	78537	82250	76858	77842	79471	159378	158776	166658	161612	160465	241982	240039	245244	239217	241816	325410	317501	325175	320761	322372		1449	1504	1595	1628	1806	1695	2214	2389	2422	2238	2633	5161	4801	4946	4924	5613	7406	7703	8447	8065	7860	10640	10239
1450	48479	45246	49148	51300	49627	78869	82575	77156	78154	79770	159961	159346	167271	162210	161062	242885	240892	246194	240135	242712	326565	318714	326380	322026	323516		1450	1505	1599	1636	1811	1696	2222	2392	2425	2245	2633	5167	4831	4963	4932	5618	7427	7717	8467	8081	7877	10670	10241
1451	48648	45427	49321	51503	49799	79188	82851	77445	78423	80039	160628	159949	167874	162809	161686	243828	241762	247108	241017	243602	327748	319926	327635	323189	324729		1451	1510	1602	1637	1813	1697	2222	2392	2426	2246	2642	5181	4835	4977	4947	5634	7439	7727	8490	8097	7890	10703	10277
1452	48833	45588	49516	51681	49952	79480	83154	77733	78740	80349	161251	160551	168488	163430	162261	244735	242682	247972	241952	244520	328988	321151	328873	324375	325926		1452	1510	1602	1650	1814	1702	2224	2394	2428	2249	2647	5200	4843	4985	4956	5649	7457	7742	8507	8114	7914	10725	10304
1453	49014	45734	49671	51906	50129	79787	83462	78005	79024	80620	161846	161169	169127	164051	162877	245623	243593	248852	242866	245435	330248	322276	330110	325597	327097		1453	1512	1606	1657	1818	1706	2232	2398	2436	2250	2649	5209	4853	4993	4965	5658	7475	7768	8519	8132	7922	10746	10323
1454	49212	45921	49884	52089	50350	80054	83740	78310	79308	80911	162440	161706	169790	164658	163472	246550	244503	249773	243720	246389	331577	323464	331389	326811	328316		1454	1517	1609	1661	1822	1709	2236	2401	2441	2256	2653	5219	4857	5010	4984	5669	7495	7786	8537	8162	7939	10778	10347
1455	49393	46078	50074	52317	50540	80330	84015	78606	79579	81245	163003	162278	170427	165294	164076	247449	245416	250698	244608	247282	332809	324676	332581	328013	329569		1455	1521	1615	1663	1825	1711	2245	2405	2444	2260	2656	5237	4877	5018	5005	5684	7507	7804	8555	8184	7971	10792	10359
1456	49566	46267	50234	52520	50716	80640	84318	78942	79902	81546	163655	162900	171055	165888	164650	248389	246350	251591	245465	248224	334047	325911	333844	329250	330837		1456	1522	1616	1668	1827	1711	2248	2422	2449	2264	2659	5259	4879	5021	5011	5695	7520	7831	8574	8223	7980	10808	10368
1457	49777	46438	50443	52739	50888	80939	84649	79254	80223	81859	164267	163501	171697	166510	165274	249300	247281	252555	246329	249134	335265	327076	335068	330550	331997		1457	1524	1616	1672	1839	1712	2260	2429	2454	2269	2665	5261	4895	5039	5030	5708	7542	7843	8578	8237	7990	10825	10379
1458	49967	46609	50652	52919	51081	81255	84975	79538	80524	82187	164900	164132	172339	167082	165899	250225	248151	253486	247190	250052	336454	328319	336308	331791	333240		1458	1524	1619	1672	1840	1712	2265	2441	2463	2273	2673	5273	4901	5048	5042	5719	7550	7862	8601	8258	8013	10853	10410
1459	50151	46796	50849	53106	51307	81550	85284	79826	80803	82484	165506	164780	172988	167725	166534	251140	249063	254469	248092	250971	337737	329512	337520	333044	334520		1459	1528	1622	1677	1841	1717	2272	2442	2471	2288	2681	5296	4919	5058	5051	5723	7583	7867	8618	8280	8038	10891	10438
1460	50305	46972	51043	53310	51508	81873	85584	80128	81138	82760	166168	165443	173637	168316	167214	252039	249967	255443	248989	251850	339005	330761	338845	334287	335719		1460	1529	1628	1683	1842	1716	2278	2450	2474	2291	2688	5301	4935	5064	5068	5741	7595	7876	8638	8307	8052	10908	10459
1461	50490	47132	51247	53495	51699	82161	85926	80407	81472	83057	166795	166027	174303	168916	167858	252999	250907	256410	249890	252888	340250	331941	340110	335546	336928		1461	1529	1635	1683	1845	1723	2290	2451	2478	2298	2693	5304	4938	5081	5076	5754	7611	7892	8659	8329	8063	10950	10483
1462	50659	47312	51428	53699	51879	82479	86265	80724	81768	83377	167423	166621	174968	169541	168530	253979	251816	257427	250839	253859	341476	333208	341418	336792	338228		1462	1534	1639	1685	1853	1725	2294	2459	2486	2302	2696	5319	4951	5093	5086	5780	7634	7913	8670	8343	8075	10993	10505
1463	50849	47526	51630	53908	52057	82779	86584	81016	82082	83678	168017	167242	175605	170159	169122	254955	252759	258334	251789	254823	342755	334530	342618	337980	339553		1463	1537	1641	1688	1856	1730	2296	2465	2491	2302	2716	5337	4954	5116	5096	5792	7644	7937	8681	8368	8115	11016	10525
1464	51038	47733	51827	54101	52261	83091	86919	81321	82387	84008	168611	167896	176294	170835	169739	255965	253670	259285	252656	255767	344091	335889	343877	339285	340827		1464	1539	1643	1696	1861	1737	2298	2470	2508	2304	2719	5353	4955	5120	5103	5800	7656	7947	8696	8385	8136	11044	10550
1465	51246	47880	52032	54291	52452	83418	87271	81663	82703	84297	169258	168510	176945	171466	170358	256901	254650	260218	253554	256654	345440	337174	345149	340513	342150		1465	1540	1650	1699	1870	1743	2302	2481	2513	2308	2727	5365	4968	5126	5124	5813	7676	7953	8714	8412	8154	11075	10590
1466	51435	48057	52234	54464	52635	83747	87595	81983	83009	84580	169842	169102	177617	172126	170945	257857	255586	261183	254542	257647	346704	338452	346420	341774	343442		1466	1541	1650	1702	1872	1747	2305	2492	2514	2315	2741	5371	4980	5127	5135	5826	7689	7967	8734	8429	8166	11099	10636
1467	51618	48263	52418	54684	52843	84089	87910	82289	83309	84921	170483	169692	178302	172766	171569	258861	256535	262145	255488	258609	348077	339769	347725	343040	344655		1467	1544	1659	1705	1885	1754	2312	2493	2519	2320	2755	5381	4987	5139	5151	5848	7707	7985	8745	8446	8195	11123	10655
1468	51827	48483	52611	54924	53018	84409	88280	82586	83603	85236	171083	170272	179006	173424	172226	259800	257463	263119	256468	259547	349357	341053	349040	344317	345916		1468	1547	1661	1707	1891	1758	2319	2498	2522	2327	2758	5401	4994	5145	5159	5852	7720	8007	8771	8469	8213	11136	10685
1469	51988	48643	52813	55123	53202	84704	88583	82907	83946	85557	171714	170871	179632	174061	172841	260758	258412	264110	257511	260506	350697	342311	350359	345590	347178		1469	1553	1664	1709	1900	1767	2323	2500	2535	2339	2761	5422	5001	5152	5183	5864	7743	8025	8790	8483	8230	11151	10702
1470	52159	48831	52995	55340	53415	85006	88886	83179	84269	85881	172371	171486	180261	174699	173468	261763	259410	265115	258414	261423	352108	343567	351719	346894	348473		1470	1553	1663	1722	1905	1768	2335	2503	2542	2347	2767	5438	5009	5173	5200	5881	7763	8047	8821	8505	8247	11176	10719
1471	52341	49018	53199	55545	53619	85320	89240	83508	84606	86183	172973	172077	180962	175377	174087	262725	260291	266061	259391	262395	353492	344863	353039	348233	349838		1471	1557	1673	1723	1911	1770	2337	2513	2554	2353	2778	5452	5025	5189	5213	5898	7780	8067	8829	8523	8265	11200	10738
1472	52515	49195	53388	55777	53800	85636	89598	83834	84917	86538	173651	172735	181655	176036	174793	263719	261277	267096	260271	263394	354792	346110	354346	349492	351151		1472	1563	1678	1734	1917	1774	2340	2518	2560	2359	2778	5471	5043	5203	5217	5914	7796	8089	8870	8543	8277	11219	10764
1473	52726	49377	53590	55968	53987	85958	89939	84148	85243	86872	174269	173388	182353	176710	175424	264669	262257	268081	261234	264346	356171	347391	355692	350827	352487		1473	1567	1681	1736	1918	1780	2344	2528	2562	2372	2792	5486	5055	5225	5229	5925	7825	8105	8892	8553	8282	11247	10784
1474	52919	49558	53792	56155	54197	86245	90277	84478	85555	87197	174908	174031	183029	177393	176066	265618	263261	269107	262187	265368	357526	348671	357094	352164	353761		1474	1570	1684	1736	1921	1787	2355	2531	2570	2375	2811	5501	5062	5242	5245	5936	7845	8118	8910	8566	8316	11286	10802
1475	53115	49736	53983	56396	54395	86552	90609	84785	85858	87520	175581	174644	183644	178031	176754	266633	264199	270013	263201	266362	358853	350026	358413	353461	355073		1475	1572	1688	1741	1923	1789	2357	2532	2576	2377	2815	5516	5068	5250	5252	5952	7863	8142	8923	8586	8329	11306	10826
1476	53313	49919	54189	56596	54596	86908	90902	85088	86198	87839	176253	175290	184357	178679	177371	267648	265198	271004	264176	267300	360150	351288	359777	354743	356436		1476	1572	1692	1741	1925	1790	2358	2540	2582	2382	2818	5528	5076	5266	5259	5971	7878	8171	8947	8614	8346	11330	10853
1477	53504	50105	54384	56789	54791	87210	91258	85403	86512	88201	176882	175942	185078	179368	178036	268624	266159	272001	265127	268242	361516	352657	361105	356113	357711		1477	1576	1696	1743	1930	1797	2367	2552	2585	2388	2829	5542	5083	5284	5271	5991	7901	8195	8962	8638	8372	11352	10875
1478	53694	50295	54598	56994	54996	87550	91570	85722	86822	88534	177456	176605	185700	180007	178716	269682	267110	273053	266106	269222	362894	354028	362460	357442	359068		1478	1594	1707	1745	1937	1798	2370	2557	2591	2388	2837	5556	5089	5293	5277	6001	7921	8195	8993	8662	8394	11380	10902
1479	53880	50503	54805	57212	55207	87880	91939	86062	87157	88854	178098	177232	186386	180680	179384	270650	268106	274054	267130	270222	364215	355450	363786	358725	360362		1479	1601	1711	1747	1940	1802	2376	2561	2590	2391	2845	5567	5098	5304	5291	6015	7945	8210	9018	8695	8414	11405	10933
1480	54065	50706	55024	57439	55408	88205	92268	86378	87477	89211	178808	177977	187042	181385	180063	271685	269123	275103	268103	271248	365524	356797	365184	360031	361778		1480	1604	1712	1760	1945	1802	2375	2563	2595	2391	2851	5573	5109	5309	5310	6037	7969	8216	9050	8724	8441	11421	10966
1481	54259	50867	55225	57654	55594	88578	92624	86718	87805	89564	179455	178667	187735	182077	180679	272722	270104	276137	269103	272248	366892	358046	366592	361403	363031		1481	1605	1717	1761	1950	1812	2373	2571	2606	2395	2857	5578	5124	5315	5323	6060	7982	8229	9063	8744	8455	11438	11001
1482	54453	51031	55424	57870	55782	88893	92964	87015	88121	89924	180116	179316	188446	182720	181304	273692	271140	277176	270094	273218	368297	359446	367947	362749	364349		1482	1607	1724	1765	1954	1825	2378	2573	2606	2400	2866	5586	5124	5321	5331	6071	7998	8244	9085	8773	8480	11459	11036
1483	54659	51212	55632	58076	55988	89201	93321	87322	88455	90258	180810	179984	189167	183407	181964	274701	272128	278228	271082	274257	369644	360790	369238	364170	365775		1483	1610	1726	1772	1966	1826	2379	2578	2616	2404	2869	5608	5130	5338	5343	6080	8008	8256	9099	8785	8500	11475	11053
1484	54841	51397	55835	58268	56162	89536	93701	87636	88762	90587	181495	180632	189900	184069	182633	275731	273055	279319	272094	275290	371014	362139	370642	365590	367141		1484	1623	1729	1776	1968	1828	2397	2585	2625	2415	2881	5616	5141	5349	5353	6092	8033	8276	9120	8798	8518	11514	11068
1485	55050	51576	56034	58477	56359	89875	94049	87961	89052	90915	182112	181348	190582	184787	183296	276769	274106	280334	273098	276311	372386	363483	372013	366910	368479		1485	1629	1733	1776	1979	1837	2405	2593	2638	2420	2884	5628	5155	5363	5365	6103	8062	8294	9132	8808	8537	11533	11083
1486	55247	51750	56266	58720	56558	90204	94338	88280	89404	91242	182813	181965	191328	185507	183985	277849	275165	281348	274085	277406	373772	364831	373403	368308	369829		1486	1633	1735	1777	1979	1840	2409	2595	2645	2426	2888	5633	5159	5385	5377	6115	8076	8305	9154	8825	8553	11555	11107
1487	55439	51970	56501	58952	56770	90499	94700	88584	89724	91602	183524	182605	192029	186135	184666	278897	276155	282395	275081	278491	375207	366211	374802	369702	371200		1487	1632	1737	1788	1986	1841	2415	2596	2647	2431	2893	5649	5170	5397	5382	6126	8093	8322	9167	8853	8571	11580	11126
1488	55664	52160	56709	59160	56989	90805	95021	88909	90069	91946	184253	183283	192741	186831	185386	279934	277229	283481	276098	279485	376622	367595	376168	371050	372626		1488	1634	1739	1796	1989	1844	2420	2608	2650	2436	2899	5663	5181	5418	5388	6138	8108	8344	9183	8867	8591	11606	11154
1489	55849	52344	56924	59357	57206	91097	95439	89258	90388	92298	184946	183961	193472	187525	186078	280983	278234	284581	277151	280455	378032	368974	377540	372494	374013		1489	1635	1745	1798	1993	1846	2429	2611	2658	2441	2900	5682	5193	5429	5410	6159	8122	8363	9193	8899	8607	11639	11176
1490	56061	52539	57104	59564	57400	91431	95790	89589	90727	92613	185634	184623	194190	188198	186720	282052	279280	285686	278190	281470	379415	370296	378944	373885	375485		1490	1641	1746	1800	1996	1849	2436	2615	2665	2442	2907	5691	5210	5438	5421	6178	8137	8376	9212	8921	8621	11666	11193
1491	56273	52756	57323	59776	57616	91745	96169	89930	91083	92986	186385	185336	194963	188907	187394	283083	280343	286756	279154	282472	380767	371695	380434	375354	376880		1491	1642	1750	1809	1996	1850	2442	2643	2668	2448	2911	5711	5217	5447	5429	6195	8159	8399	9236	8943	8636	11683	11215
1492	56489	52965	57527	60006	57822	92084	96513	90263	91422	93307	187096	185982	195708	189607	188113	284200	281418	287857	280206	283497	382112	373034	381844	376703	378362		1492	1643	1756	1810	2011	1856	2455	2647	2675	2449	2917	5725	5233	5453	5441	6199	8173	8423	9263	8962	8647	11721	11225
1493	56695	53154	57734	60254	58061	92452	96879	90592	91758	93626	187759	186673	196477	190293	188816	285228	282454	288998	281212	284566	383493	374416	383196	378044	379844		1493	1646	1767	1811	2013	1855	2457	2655	2686	2451	2928	5737	5247	5464	5455	6220	8192	8429	9286	8992	8671	11737	11255
1494	56893	53337	57964	60493	58277	92825	97231	90930	92085	93960	188492	187342	197200	190972	189550	286235	283535	290057	282210	285575	384864	375835	384647	379460	381227		1494	1648	1770	1816	2016	1862	2462	2659	2689	2466	2939	5743	5255	5470	5470	6231	8204	8448	9309	9009	8688	11775	11271
1495	57125	53548	58173	60726	58514	93136	97598	91273	92447	94312	189207	188072	197911	191668	190277	287316	284620	291201	283290	286638	386313	377155	386039	380958	382663		1495	1653	1774	1819	2017	1865	2464	2662	2694	2468	2946	5751	5267	5478	5481	6245	8226	8462	9332	9035	8710	11802	11313
1496	57367	53745	58408	60950	58713	93520	97964	91616	92783	94679	189917	188730	198668	192376	191006	288343	285680	292314	284350	287656	387711	378611	387454	382431	384133		1496	1655	1775	1823	2028	1867	2474	2663	2699	2478	2949	5767	5278	5486	5501	6261	8238	8476	9367	9064	8733	11836	11349
1497	57589	53956	58657	61181	58947	93906	98309	91974	93133	95010	190596	189437	199398	193117	191767	289428	286730	293360	285375	288676	389100	380007	388927	383870	385550		1497	1656	1778	1825	2031	1867	2475	2667	2704	2484	2955	5780	5292	5496	5504	6276	8255	8505	9385	9085	8756	11856	11371
1498	57793	54169	58854	61412	59178	94248	98696	92310	93458	95360	191334	190133	200097	193826	192467	290482	287780	294451	286455	289758	390558	381437	390321	385300	386960		1498	1659	1782	1827	2030	1877	2480	2676	2711	2485	2970	5791	5297	5505	5515	6295	8284	8540	9412	9099	8779	11880	11399
1499	58016	54375	59079	61652	59385	94626	99090	92647	93843	95718	192086	190880	200939	194587	193189	291582	288883	295617	287484	290772	391994	382833	391803	386771	388434		1499	1658	1787	1824	2033	1879	2479	2678	2717	2487	2971	5799	5313	5511	5530	6303	8305	8567	9434	9123	8789	11904	11428
[truncated: 3 more columns]
