# Supplementary material for: Empirical single-cell tracking and cell-fate simulation reveal dual roles of p53 in tumor suppression
Source: eLife. 2022 Sep 20;11:e72498. doi: 10.7554/eLife.72498 (PMC9560164; doi:10.7554/eLife.72498)
Supplement: Figure 9—figure supplement 1—source data 1. — Data used in Figure 9—figure supplement 1. [file elife-72498-fig9-figsupp1-data1.xlsx]

## Sheet: Figure 9-supplement 1
Single-cell tracking																		Simulation
	No of events		No of events		No of events		No of events		No of events		No of events		No of events		No of events				No of events							No of events							No of events							No of events							No of events
Doubling Time min	Control	Total	MNNG1	Total	MNNG3	Total	MNNG7	Total	p53 RNAi	Total	p53 RNAi-MNNG1	Total	p53 RNAi-MNNG3	Total	p53 RNAi-MNNG7	Total		Doubling Time min	Control-sim	Control-sim	Control-sim	Control-sim	Control-sim	Average	Total	MNNG1-sim	MNNG1-sim	MNNG1-sim	MNNG1-sim	MNNG1-sim	Average	Total	MMMG3-sim	MMMG3-sim	MMMG3-sim	MMMG3-sim	MMMG3-sim	Average	Total	MNNG7-sim	MNNG7-sim	MNNG7-sim	MNNG7-sim	MNNG7-sim	Average	Total	p53 RNAi-sim	p53 RNAi-sim	p53 RNAi-sim
0		0		0		0		0		0		0		0		0		0						0	0						0	0						0	0						0	0
1		0		0		0		0		0		0		0		0		1						0	0						0	0						0	0						0	0
2		0		0		0		0		0		0		0		0		2						0	0						0	0						0	0						0	0
3		0		0		0		0		0		0		0		0		3						0	0						0	0						0	0						0	0
4		0		0		0		0		0		0		0		0		4						0	0						0	0						0	0						0	0
5		0		0		0		0		0		0		0		0		5						0	0						0	0						0	0						0	0
6		0		0		0		0		0		0		0		0		6						0	0						0	0						0	0						0	0
7		0		0		0		0		0		0		0		0		7						0	0						0	0						0	0						0	0
8		0		0		0		0		0		0		0		0		8						0	0						0	0						0	0						0	0
9		0		0		0		0		0		0		0		0		9						0	0						0	0						0	0						0	0
10		0		0		0		0		0		0		0		0		10						0	0						0	0						0	0						0	0
11		0		0		0		0		0		0		0		0		11						0	0						0	0						0	0						0	0
12		0		0		0		0		0		0		0		0		12						0	0						0	0						0	0						0	0
13		0		0		0		0		0		0		0		0		13						0	0						0	0						0	0						0	0
14		0		0		0		0		0		0		0		0		14						0	0						0	0						0	0						0	0
15		0		0		0		0		0		0		0		0		15						0	0						0	0						0	0						0	0
16		0		0		0		0		0		0		0		0		16						0	0						0	0						0	0						0	0
17		0		0		0		0		0		0		0		0		17						0	0						0	0						0	0						0	0
18		0		0		0		0		0		0		0		0		18						0	0						0	0						0	0						0	0
19		0		0		0		0		0		0		0		0		19						0	0						0	0						0	0						0	0
20		0		0		0		0		0		0		0		0		20						0	0						0	0						0	0						0	0
21		0		0		0		0		0		0		0		0		21						0	0						0	0						0	0						0	0
22		0		0		0		0		0		0		0		0		22						0	0						0	0						0	0						0	0
23		0		0		0		0		0		0		0		0		23						0	0						0	0						0	0						0	0
24		0		0		0		0		0		0		0		0		24						0	0						0	0						0	0						0	0
25		0		0		0		0		0		0		0		0		25						0	0						0	0						0	0						0	0
26		0		0		0		0		0		0		0		0		26						0	0						0	0						0	0						0	0
27		0		0		0		0		0		0		0		0		27						0	0						0	0						0	0						0	0
28		0		0		0		0		0		0		0		0		28						0	0						0	0						0	0						0	0
29		0		0		0		0		0		0		0		0		29						0	0						0	0						0	0						0	0
30		0		0		0		0		0		0		0		0		30						0	0						0	0						0	0						0	0
31		0		0		0		0		0		0		0		0		31						0	0						0	0						0	0						0	0
32		0		0		0		0		0		0		0		0		32						0	0						0	0						0	0						0	0
33		0		0		0		0		0		0		0		0		33						0	0						0	0						0	0						0	0
34		0		0		0		0		0		0		0		0		34						0	0						0	0						0	0						0	0
35		0		0		0		0		0		0		0		0		35						0	0						0	0						0	0						0	0
36		0		0		0		0		0		0		0		0		36						0	0						0	0						0	0						0	0
37		0		0		0		0		0		0		0		0		37						0	0						0	0						0	0						0	0
38		0		0		0		0		0		0		0		0		38						0	0						0	0						0	0						0	0
39		0		0		0		0		0		0		0		0		39						0	0						0	0						0	0						0	0
40		0		0		0		0		0		0		0		0		40						0	0						0	0						0	0						0	0
41		0		0		0		0		0		0		0		0		41						0	0						0	0						0	0						0	0
42		0		0		0		0		0		0		0		0		42						0	0						0	0						0	0						0	0
43		0		0		0		0		0		0		0		0		43						0	0						0	0						0	0						0	0
44		0		0		0		0		0		0		0		0		44						0	0						0	0						0	0						0	0
45		0		0		0		0		0		0		0		0		45						0	0						0	0						0	0						0	0
46		0		0		0		0		0		0		0		0		46						0	0						0	0						0	0						0	0
47		0		0		0		0		0		0		0		0		47						0	0						0	0						0	0						0	0
48		0		0		0		0		0		0		0		0		48						0	0						0	0						0	0						0	0
49		0		0		0		0		0		0		0		0		49						0	0						0	0						0	0						0	0
50		0		0		0		0		0		0		0		0		50						0	0						0	0						0	0						0	0
51		0		0		0		0		0		0		0		0		51						0	0						0	0						0	0						0	0
52		0		0		0		0		0		0		0		0		52						0	0						0	0						0	0						0	0
53		0		0		0		0		0		0		0		0		53						0	0						0	0						0	0						0	0
54		0		0		0		0		0		0		0		0		54						0	0						0	0						0	0						0	0
55		0		0		0		0		0		0		0		0		55						0	0						0	0						0	0						0	0
56		0		0		0		0		0		0		0		0		56						0	0						0	0						0	0						0	0
57		0		0		0		0		0		0		0		0		57						0	0						0	0						0	0						0	0
58		0		0		0		0		0		0		0		0		58						0	0						0	0						0	0						0	0
59		0		0		0		0		0		0		0		0		59						0	0						0	0						0	0						0	0
60		0		0		0		0		0		0		0		0		60						0	0						0	0						0	0						0	0
61		0		0		0		0		0		0		0		0		61						0	0						0	0						0	0						0	0
62		0		0		0		0		0		0		0		0		62						0	0						0	0						0	0						0	0
63		0		0		0		0		0		0		0		0		63						0	0						0	0						0	0						0	0
64		0		0		0		0		0		0		0		0		64						0	0						0	0						0	0						0	0
65		0		0		0		0		0		0		0		0		65						0	0						0	0						0	0						0	0
66		0		0		0		0		0		0		0		0		66						0	0						0	0						0	0						0	0
67		0		0		0		0		0		0		0		0		67						0	0						0	0						0	0						0	0
68		0		0		0		0		0		0		0		0		68						0	0						0	0						0	0						0	0
69		0		0		0		0		0		0		0		0		69						0	0						0	0						0	0						0	0
70		0		0		0		0		0		0		0		0		70						0	0						0	0						0	0						0	0
71		0		0		0		0		0		0		0		0		71						0	0						0	0						0	0						0	0
72		0		0		0		0		0		0		0		0		72						0	0						0	0						0	0						0	0
73		0		0		0		0		0		0		0		0		73						0	0						0	0						0	0						0	0
74		0		0		0		0		0		0		0		0		74						0	0						0	0						0	0						0	0
75		0		0		0		0		0		0		0		0		75						0	0						0	0						0	0						0	0
76		0		0		0		0		0		0		0		0		76						0	0						0	0						0	0						0	0
77		0		0		0		0		0		0		0		0		77						0	0						0	0						0	0						0	0
78		0		0		0		0		0		0		0		0		78						0	0						0	0						0	0						0	0
79		0		0		0		0		0		0		0		0		79						0	0						0	0						0	0						0	0
80		0		0		0		0		0		0		0		0		80						0	0						0	0						0	0						0	0
81		0		0		0		0		0		0		0		0		81						0	0						0	0						0	0						0	0
82		0		0		0		0		0		0		0		0		82						0	0						0	0						0	0						0	0
83		0		0		0		0		0		0		0		0		83						0	0						0	0						0	0						0	0
84		0		0		0		0		0		0		0		0		84						0	0						0	0						0	0						0	0
85		0		0		0		0		0		0		0		0		85						0	0						0	0						0	0						0	0
86		0		0		0		0		0		0		0		0		86						0	0						0	0						0	0						0	0
87		0		0		0		0		0		0		0		0		87						0	0						0	0						0	0						0	0
88		0		0		0		0		0		0		0		0		88						0	0						0	0						0	0						0	0
89		0		0		0		0		0		0		0		0		89						0	0						0	0						0	0						0	0
90		0		0		0		0		0		0		0		0		90						0	0						0	0						0	0						0	0
91		0		0		0		0		0		0		0		0		91						0	0						0	0						0	0						0	0
92		0		0		0		0		0		0		0		0		92						0	0						0	0						0	0						0	0
93		0		0		0		0		0		0		0		0		93						0	0						0	0						0	0						0	0
94		0		0		0		0		0		0		0		0		94						0	0						0	0						0	0						0	0
95		0		0		0		0		0		0		0		0		95						0	0						0	0						0	0						0	0
96		0		0		0		0		0		0		0		0		96						0	0						0	0						0	0						0	0
97		0		0		0		0		0		0		0		0		97						0	0						0	0						0	0						0	0
98		0		0		0		0		0		0		0		0		98						0	0						0	0						0	0						0	0
99		0		0		0		0		0		0		0		0		99						0	0						0	0						0	0						0	0
100		0		0		0		0		0		0		0		0		100						0	0						0	0						0	0						0	0
101		0		0		0		0		0		0		0		0		101						0	0						0	0						0	0						0	0
102		0		0		0		0		0		0		0		0		102						0	0						0	0						0	0						0	0
103		0		0		0		0		0		0		0		0		103						0	0						0	0						0	0						0	0
104		0		0		0		0		0		0		0		0		104						0	0						0	0						0	0						0	0
105		0		0		0		0		0		0		0		0		105						0	0						0	0						0	0						0	0
106		0		0		0		0		0		0		0		0		106						0	0						0	0						0	0						0	0
107		0		0		0		0		0		0		0		0		107						0	0						0	0						0	0						0	0
108		0		0		0		0		0		0		0		0		108						0	0						0	0						0	0						0	0
109		0		0		0		0		0		0		0		0		109						0	0						0	0						0	0						0	0
110		0		0		0		0		0		0		0		0		110						0	0						0	0						0	0						0	0
111		0		0		0		0		0		0		0		0		111						0	0						0	0						0	0						0	0
112		0		0		0		0		0		0		0		0		112						0	0						0	0						0	0						0	0
113		0		0		0		0		0		0		0		0		113						0	0						0	0						0	0						0	0
114		0		0		0		0		0		0		0		0		114						0	0						0	0						0	0						0	0
115		0		0		0		0		0		0		0		0		115						0	0						0	0						0	0						0	0
116		0		0		0		0		0		0		0		0		116						0	0						0	0						0	0						0	0
117		0		0		0		0		0		0		0		0		117						0	0						0	0						0	0						0	0
118		0		0		0		0		0		0		0		0		118						0	0						0	0						0	0						0	0
119		0		0		0		0		0		0		0		0		119						0	0						0	0						0	0						0	0
120		0		0		0		0		0		0		0		0		120						0	0						0	0						0	0						0	0
121		0		0		0		0		0		0		0		0		121						0	0						0	0						0	0						0	0
122		0		0		0		0		0		0		0		0		122						0	0						0	0						0	0						0	0
123		0		0		0		0		0		0		0		0		123						0	0						0	0						0	0						0	0
124		0		0		0		0		0		0		0		0		124						0	0						0	0						0	0						0	0
125		0		0		0		0		0		0		0		0		125						0	0						0	0						0	0						0	0
126		0		0		0		0		0		0		0		0		126						0	0						0	0						0	0						0	0
127		0		0		0		0		0		0		0		0		127						0	0						0	0						0	0						0	0
128		0		0		0		0		0		0		0		0		128						0	0						0	0						0	0						0	0
129		0		0		0		0		0		0		0		0		129						0	0						0	0						0	0						0	0
130		0		0		0		0		0		0		0		0		130						0	0						0	0						0	0						0	0
131		0		0		0		0		0		0		0		0		131						0	0						0	0						0	0						0	0
132		0		0		0		0		0		0		0		0		132						0	0						0	0						0	0						0	0
133		0		0		0		0		0		0		0		0		133						0	0						0	0						0	0						0	0
134		0		0		0		0		0		0		0		0		134						0	0						0	0						0	0						0	0
135		0		0		0		0		0		0		0		0		135						0	0						0	0						0	0						0	0
136		0		0		0		0		0		0		0		0		136						0	0						0	0						0	0						0	0
137		0		0		0		0		0		0		0		0		137						0	0						0	0						0	0						0	0
138		0		0		0		0		0		0		0		0		138						0	0						0	0						0	0						0	0
139		0		0		0		0		0		0		0		0		139						0	0						0	0						0	0						0	0
140		0		0		0		0		0		0		0		0		140						0	0						0	0						0	0						0	0
141		0		0		0		0		0		0		0		0		141						0	0						0	0						0	0						0	0
142		0		0		0		0		0		0		0		0		142						0	0						0	0						0	0						0	0
143		0		0		0		0		0		0		0		0		143						0	0						0	0						0	0						0	0
144		0		0		0		0		0		0		0		0		144						0	0						0	0						0	0						0	0
145		0		0		0		0		0		0		0		0		145						0	0						0	0						0	0						0	0
146		0		0		0		0		0		0		0		0		146						0	0						0	0						0	0						0	0
147		0		0		0		0		0		0		0		0		147						0	0						0	0						0	0						0	0
148		0		0		0		0		0		0		0		0		148						0	0						0	0						0	0						0	0
149		0		0		0		0		0		0		0		0		149						0	0						0	0						0	0						0	0
150		0		0		0		0		0		0		0		0		150						0	0						0	0						0	0						0	0
151		0		0		0		0		0		0		0		0		151						0	0						0	0						0	0						0	0
152		0		0		0		0		0		0		0		0		152						0	0						0	0						0	0						0	0
153		0		0		0		0		0		0		0		0		153						0	0						0	0						0	0						0	0
154		0		0		0		0		0		0		0		0		154						0	0						0	0						0	0						0	0
155		0		0		0		0		0		0		0		0		155						0	0						0	0						0	0						0	0
156		0		0		0		0		0		0		0		0		156						0	0						0	0						0	0						0	0
157		0		0		0		0		0		0		0		0		157						0	0						0	0						0	0						0	0
158		0		0		0		0		0		0		0		0		158						0	0						0	0						0	0						0	0
159		0		0		0		0		0		0		0		0		159						0	0						0	0						0	0						0	0
160		0		0		0		0		0		0		0		0		160						0	0						0	0						0	0						0	0
161		0		0		0		0		0		0		0		0		161						0	0						0	0						0	0						0	0
162		0		0		0		0		0		0		0		0		162						0	0						0	0						0	0						0	0
163		0		0		0		0		0		0		0		0		163						0	0						0	0						0	0						0	0
164		0		0		0		0		0		0		0		0		164						0	0						0	0						0	0						0	0
165		0		0		0		0		0		0		0		0		165						0	0						0	0						0	0						0	0
166		0		0		0		0		0		0		0		0		166						0	0						0	0						0	0						0	0
167		0		0		0		0		0		0		0		0		167						0	0						0	0						0	0						0	0
168		0		0		0		0		0		0		0		0		168						0	0						0	0						0	0						0	0
169		0		0		0		0		0		0		0		0		169						0	0						0	0						0	0						0	0
170		0		0		0		0		0		0		0		0		170						0	0						0	0						0	0						0	0
171		0		0		0		0		0		0		0		0		171						0	0						0	0						0	0						0	0
172		0		0		0		0		0		0		0		0		172						0	0						0	0						0	0						0	0
173		0		0		0		0		0		0		0		0		173						0	0						0	0						0	0						0	0
174		0		0		0		0		0		0		0		0		174						0	0						0	0						0	0						0	0
175		0		0		0		0		0		0		0		0		175						0	0						0	0						0	0						0	0
176		0		0		0		0		0		0		0		0		176						0	0						0	0						0	0						0	0
177		0		0		0		0		0		0		0		0		177						0	0						0	0						0	0						0	0
178		0		0		0		0		0		0		0		0		178						0	0						0	0						0	0						0	0
179		0		0		0		0		0		0		0		0		179						0	0						0	0						0	0						0	0
180		0		0		0		0		0		0		0		0		180						0	0						0	0						0	0						0	0
181		0		0		0		0		0		0		0		0		181						0	0						0	0						0	0						0	0
182		0		0		0		0		0		0		0		0		182						0	0						0	0						0	0						0	0
183		0		0		0		0		0		0		0		0		183						0	0						0	0						0	0						0	0
184		0		0		0		0		0		0		0		0		184						0	0						0	0						0	0						0	0
185		0		0		0		0		0		0		0		0		185						0	0						0	0						0	0						0	0
186		0		0		0		0		0		0		0		0		186						0	0						0	0						0	0						0	0
187		0		0		0		0		0		0		0		0		187						0	0						0	0						0	0						0	0
188		0		0		0		0		0		0		0		0		188						0	0						0	0						0	0						0	0
189		0		0		0		0		0		0		0		0		189						0	0						0	0						0	0						0	0
190		0		0		0		0		0		0		0		0		190						0	0						0	0						0	0						0	0
191		0		0		0		0		0		0		0		0		191						0	0						0	0						0	0						0	0
192		0		0		0		0		0		0		0		0		192						0	0						0	0						0	0						0	0
193		0		0		0		0		0		0		0		0		193						0	0						0	0						0	0						0	0
194		0		0		0		0		0		0		0		0		194						0	0						0	0						0	0						0	0
195		0		0		0		0		0		0		0		0		195						0	0						0	0						0	0						0	0
196		0		0		0		0		0		0		0		0		196						0	0						0	0						0	0						0	0
197		0		0		0		0		0		0		0		0		197						0	0						0	0						0	0						0	0
198		0		0		0		0		0		0		0		0		198						0	0						0	0						0	0						0	0
199		0		0		0		0		0		0		0		0		199						0	0						0	0						0	0						0	0
200		0		0		0		0		0		0		0		0		200						0	0						0	0						0	0						0	0
201		0		0		0		0		0		0		0		0		201						0	0						0	0						0	0						0	0
202		0		0		0		0		0		0		0		0		202						0	0						0	0						0	0						0	0
203		0		0		0		0		0		0		0		0		203						0	0						0	0						0	0						0	0
204		0		0		0		0		0		0		0		0		204						0	0						0	0						0	0						0	0
205		0		0		0		0		0		0		0		0		205						0	0						0	0						0	0						0	0
206		0		0		0		0		0		0		0		0		206						0	0						0	0						0	0						0	0
207		0		0		0		0		0		0		0		0		207						0	0						0	0						0	0						0	0
208		0		0		0		0		0		0		0		0		208						0	0						0	0						0	0						0	0
209		0		0		0		0		0		0		0		0		209						0	0						0	0						0	0						0	0
210		0		0		0		0		0		0		0		0		210						0	0						0	0						0	0						0	0
211		0		0		0		0		0		0		0		0		211						0	0						0	0						0	0						0	0
212		0		0		0		0		0		0		0		0		212						0	0						0	0						0	0						0	0
213		0		0		0		0		0		0		0		0		213						0	0						0	0						0	0						0	0
214		0		0		0		0		0		0		0		0		214						0	0						0	0						0	0						0	0
215		0		0		0		0		0		0		0		0		215						0	0						0	0						0	0						0	0
216		0		0		0		0		0		0		0		0		216						0	0						0	0						0	0						0	0
217		0		0		0		0		0		0		0		0		217						0	0						0	0						0	0						0	0
218		0		0		0		0		0		0		0		0		218						0	0						0	0						0	0						0	0
219		0		0		0		0		0		0		0		0		219						0	0						0	0						0	0						0	0
220		0		0		0		0		0		0		0		0		220						0	0						0	0						0	0						0	0
221		0		0		0		0		0		0		0		0		221						0	0						0	0						0	0						0	0
222		0		0		0		0		0		0		0		0		222						0	0						0	0						0	0						0	0
223		0		0		0		0		0		0		0		0		223						0	0						0	0						0	0						0	0
224		0		0		0		0		0		0		0		0		224						0	0						0	0						0	0						0	0
225		0		0		0		0		0		0		0		0		225						0	0						0	0						0	0						0	0
226		0		0		0		0		0		0		0		0		226						0	0						0	0						0	0						0	0
227		0		0		0		0		0		0		0		0		227						0	0						0	0						0	0						0	0
228		0		0		0		0		0		0		0		0		228						0	0						0	0						0	0						0	0
229		0		0		0		0		0		0		0		0		229						0	0						0	0						0	0						0	0
230		0		0		0		0		0		0		0		0		230						0	0						0	0						0	0						0	0
231		0		0		0		0		0		0		0		0		231						0	0						0	0						0	0						0	0
232		0		0		0		0		0		0		0		0		232						0	0						0	0						0	0						0	0
233		0		0		0		0		0		0		0		0		233						0	0						0	0						0	0						0	0
234		0		0		0		0		0		0		0		0		234						0	0						0	0						0	0						0	0
235		0		0		0		0		0		0		0		0		235						0	0						0	0						0	0						0	0
236		0		0		0		0		0		0		0		0		236						0	0						0	0						0	0						0	0
237		0		0		0		0		0		0		0		0		237						0	0						0	0						0	0						0	0
238		0		0		0		0		0		0		0		0		238						0	0						0	0						0	0						0	0
239		0		0		0		0		0		0		0		0		239						0	0						0	0						0	0						0	0
240		0		0		0		0		0		0		0		0		240						0	0						0	0						0	0						0	0
241		0		0		0		0		0		0		0		0		241						0	0						0	0						0	0						0	0
242		0		0		0		0		0		0		0		0		242						0	0						0	0						0	0						0	0
243		0		0		0		0		0		0		0		0		243						0	0						0	0						0	0						0	0
244		0		0		0		0		0		0		0		0		244						0	0						0	0						0	0						0	0
245		0		0		0		0		0		0		0		0		245						0	0						0	0						0	0						0	0
246		0		0		0		0		0		0		0		0		246						0	0						0	0						0	0						0	0
247		0		0		0		0		0		0		0		0		247						0	0						0	0						0	0						0	0
248		0		0		0		0		0		0		0		0		248						0	0						0	0						0	0						0	0
249		0		0		0		0		0		0		0		0		249						0	0						0	0						0	0						0	0
250		0		0		0		0		0		0		0		0		250						0	0						0	0						0	0						0	0
251		0		0		0		0		0		0		0		0		251						0	0						0	0						0	0						0	0
252		0		0		0		0		0		0		0		0		252						0	0						0	0						0	0						0	0
253		0		0		0		0		0		0		0		0		253						0	0						0	0						0	0						0	0
254		0		0		0		0		0		0		0		0		254						0	0						0	0						0	0						0	0
255		0		0		0		0		0		0		0		0		255						0	0						0	0						0	0						0	0
256		0		0		0		0		0		0		0		0		256						0	0						0	0						0	0						0	0
257		0		0		0		0		0		0		0		0		257						0	0						0	0						0	0						0	0
258		0		0		0		0		0		0		0		0		258						0	0						0	0						0	0						0	0
259		0		0		0		0		0		0		0		0		259						0	0						0	0						0	0						0	0
260		0		0		0		0		0		0		0		0		260						0	0						0	0						0	0						0	0
261		0		0		0		0		0		0		0		0		261						0	0						0	0						0	0						0	0
262		0		0		0		0		0		0		0		0		262						0	0						0	0						0	0						0	0
263		0		0		0		0		0		0		0		0		263						0	0						0	0						0	0						0	0
264		0		0		0		0		0		0		0		0		264						0	0						0	0						0	0						0	0
265		0		0		0		0		0		0		0		0		265						0	0						0	0						0	0						0	0
266		0		0		0		0		0		0		0		0		266						0	0						0	0						0	0						0	0
267		0		0		0		0		0		0		0		0		267						0	0						0	0						0	0						0	0
268		0		0		0		0		0		0		0		0		268						0	0						0	0						0	0						0	0
269		0		0		0		0		0		0		0		0		269						0	0						0	0						0	0						0	0
270		0		0		0		0		0		0		0		0		270						0	0						0	0						0	0						0	0
271		0		0		0		0		0		0		0		0		271						0	0						0	0						0	0						0	0
272		0		0		0		0		0		0		0		0		272						0	0						0	0						0	0						0	0
273		0		0		0		0		0		0		0		0		273						0	0						0	0						0	0						0	0
274		0		0		0		0		0		0		0		0		274						0	0						0	0						0	0						0	0
275		0		0		0		0		0		0		0		0		275						0	0						0	0						0	0						0	0
276		0		0		0		0		0		0		0		0		276						0	0						0	0						0	0						0	0
277		0		0		0		0		0		0		0		0		277						0	0						0	0						0	0						0	0
278		0		0		0		0		0		0		0		0		278						0	0						0	0						0	0						0	0
279		0		0		0		0		0		0		0		0		279						0	0						0	0						0	0						0	0
280		0		0		0		0		0		0		0		0		280						0	0						0	0						0	0						0	0
281		0		0		0		0		0		0		0		0		281						0	0						0	0						0	0						0	0
282		0		0		0		0		0		0		0		0		282						0	0						0	0						0	0						0	0
283		0		0		0		0		0		0		0		0		283						0	0						0	0						0	0						0	0
284		0		0		0		0		0		0		0		0		284						0	0						0	0						0	0						0	0
285		0		0		0		0		0		0		0		0		285						0	0						0	0						0	0						0	0
286		0		0		0		0		0		0		0		0		286						0	0						0	0						0	0						0	0
287		0		0		0		0		0		0		0		0		287						0	0						0	0						0	0						0	0
288		0		0		0		0		0		0		0		0		288						0	0						0	0						0	0						0	0
289		0		0		0		0		0		0		0		0		289						0	0						0	0						0	0						0	0
290		0		0		0		0		0		0		0		0		290						0	0						0	0						0	0						0	0	5	1	3
291		0		0		0		0		0		0		0		0		291						0	0						0	0						0	0						0	0
292		0		0		0		0		0		0		0		0		292						0	0						0	0						0	0						0	0
293		0		0		0		0		0		0		0		0		293						0	0						0	0						0	0						0	0
294		0		0		0		0		0		0		0		0		294						0	0						0	0						0	0						0	0
295		0		0		0		0		0		0		0		0		295						0	0						0	0						0	0						0	0
296		0		0		0		0		0		0		0		0		296						0	0						0	0						0	0						0	0
297		0		0		0		0		0		0		0		0		297						0	0						0	0						0	0						0	0
298		0		0		0		0		0		0		0		0		298						0	0						0	0						0	0						0	0
299		0		0		0		0		0		0		0		0		299						0	0						0	0						0	0						0	0
300		0		0		0		0		0		0		0		0		300						0	0						0	0						0	0						0	0
301		0		0		0		0		0		0		0		0		301						0	0						0	0						0	0						0	0
302		0		0		0		0		0		0		0		0		302						0	0						0	0						0	0						0	0
303		0		0		0		0		0		0		0		0		303						0	0						0	0						0	0						0	0
304		0		0		0		0		0		0		0		0		304						0	0						0	0						0	0						0	0
305		0		0		0		0		0		0		0		0		305						0	0						0	0						0	0						0	0
306		0		0		0		0		0		0		0		0		306						0	0						0	0						0	0						0	0
307		0		0		0		0		0		0		0		0		307						0	0						0	0						0	0						0	0
308		0		0		0		0		0		0		0		0		308						0	0						0	0						0	0						0	0
309		0		0		0		0		0		0		0		0		309						0	0						0	0						0	0						0	0
310		0		0		0		0		0		0		0		0		310						0	0						0	0						0	0						0	0		1
311		0		0		0		0		0		0		0		0		311						0	0						0	0						0	0						0	0
312		0		0		0		0		0		0		0		0		312						0	0						0	0						0	0						0	0
313		0		0		0		0		0		0		0		0		313						0	0						0	0						0	0						0	0
314		0		0		0		0		0		0		0		0		314						0	0						0	0						0	0						0	0
315		0		0		0		0		0		0		0		0		315						0	0						0	0						0	0						0	0
316		0		0		0		0		0		0		0		0		316						0	0						0	0						0	0						0	0
317		0		0		0		0		0		0		0		0		317						0	0						0	0						0	0						0	0
318		0		0		0		0		0		0		0		0		318						0	0						0	0						0	0						0	0
319		0		0		0		0		0		0		0		0		319						0	0						0	0						0	0						0	0
320		0		0		0		0		0		0		0		0		320						0	0						0	0						0	0						0	0
321		0		0		0		0		0		0		0		0		321						0	0						0	0						0	0						0	0
322		0		0		0		0		0		0		0		0		322						0	0						0	0						0	0						0	0
323		0		0		0		0		0		0		0		0		323						0	0						0	0						0	0						0	0
324		0		0		0		0		0		0		0		0		324						0	0						0	0						0	0						0	0
325		0		0		0		0		0		0		0		0		325						0	0						0	0						0	0						0	0
326		0		0		0		0		0		0		0		0		326						0	0						0	0						0	0						0	0
327		0		0		0		0		0		0		0		0		327						0	0						0	0						0	0						0	0
328		0		0		0		0		0		0		0		0		328						0	0						0	0						0	0						0	0
329		0		0		0		0		0		0		0		0		329						0	0						0	0						0	0						0	0
330		0		0		0		0		0		0		0		0		330						0	0						0	0						0	0						0	0
331		0		0		0		0		0		0		0		0		331						0	0						0	0						0	0						0	0
332		0		0		0		0		0		0		0		0		332						0	0						0	0						0	0						0	0
333		0		0		0		0		0		0		0		0		333						0	0						0	0						0	0						0	0
334		0		0		0		0		0		0		0		0		334						0	0						0	0						0	0						0	0
335		0		0		0		0		0		0		0		0		335						0	0						0	0						0	0						0	0
336		0		0		0		0		0		0		0		0		336						0	0						0	0						0	0						0	0
337		0		0		0		0		0		0		0		0		337						0	0						0	0						0	0						0	0
338		0		0		0		0		0		0		0		0		338						0	0						0	0						0	0						0	0
339		0		0		0		0		0		0		0		0		339						0	0						0	0						0	0						0	0
340		0		0		0		0		0		0		0		0		340						0	0						0	0						0	0						0	0
341		0		0		0		0		0		0		0		0		341						0	0						0	0						0	0						0	0
342		0		0		0		0		0		0		0		0		342						0	0						0	0						0	0						0	0
343		0		0		0		0		0		0		0		0		343						0	0						0	0						0	0						0	0
344		0		0		0		0		0		0		0		0		344						0	0						0	0						0	0						0	0
345		0		0		0		0		0		0		0		0		345						0	0						0	0						0	0						0	0
346		0		0		0		0		0		0		0		0		346						0	0						0	0						0	0						0	0
347		0		0		0		0		0		0		0		0		347						0	0						0	0						0	0						0	0
348		0		0		0		0		0		0		0		0		348						0	0						0	0						0	0						0	0
349		0		0		0		0		0		0		0		0		349						0	0						0	0						0	0						0	0
350		0		0		0		0		0		0		0		0		350						0	0						0	0						0	0						0	0
351		0		0		0		0		0		0		0		0		351						0	0						0	0						0	0						0	0
352		0		0		0		0		0		0		0		0		352						0	0						0	0						0	0						0	0
353		0		0		0		0		0		0		0		0		353						0	0						0	0						0	0						0	0
354		0		0		0		0		0		0		0		0		354						0	0						0	0						0	0						0	0
355		0		0		0		0		0		0		0		0		355						0	0						0	0						0	0						0	0
356		0		0		0		0		0		0		0		0		356						0	0						0	0						0	0						0	0
357		0		0		0		0		0		0		0		0		357						0	0						0	0						0	0						0	0
358		0		0		0		0		0		0		0		0		358						0	0						0	0						0	0						0	0
359		0		0		0		0		0		0		0		0		359						0	0						0	0						0	0						0	0
360		0		0		0		0		0		0		0		0		360						0	0						0	0						0	0						0	0
361		0		0		0		0		0		0		0		0		361						0	0						0	0						0	0						0	0
362		0		0		0		0		0		0		0		0		362						0	0						0	0						0	0						0	0
363		0		0		0		0		0		0		0		0		363						0	0						0	0						0	0						0	0
364		0		0		0		0		0		0		0		0		364						0	0						0	0						0	0						0	0
365		0		0		0		0		0		0		0		0		365						0	0						0	0						0	0						0	0
366		0		0		0		0		0		0		0		0		366						0	0						0	0						0	0						0	0
367		0		0		0		0		0		0		0		0		367						0	0						0	0						0	0						0	0
368		0		0		0		0		0		0		0		0		368						0	0						0	0						0	0						0	0
369		0		0		0		0		0		0		0		0		369						0	0						0	0						0	0						0	0
370		0		0		0		0		0		0		0		0		370						0	0						0	0						0	0						0	0
371		0		0		0		0		0		0		0		0		371						0	0						0	0						0	0						0	0
372		0		0		0		0		0		0		0		0		372						0	0						0	0						0	0						0	0
373		0		0		0		0		0		0		0		0		373						0	0						0	0						0	0						0	0
374		0		0		0		0		0		0		0		0		374						0	0						0	0						0	0						0	0
375		0		0		0		0		0		0		0		0		375						0	0						0	0						0	0						0	0
376		0		0		0		0		0		0		0		0		376						0	0						0	0						0	0						0	0
377		0		0		0		0		0		0		0		0		377						0	0						0	0						0	0						0	0
378		0		0		0		0		0		0		0		0		378						0	0						0	0						0	0						0	0
379		0		0		0		0		0		0		0		0		379						0	0						0	0						0	0						0	0
380		0		0		0		0		0		0		0		0		380						0	0						0	0						0	0						0	0
381		0		0		0		0		0		0		0		0		381						0	0						0	0						0	0						0	0
382		0		0		0		0		0		0		0		0		382						0	0						0	0						0	0						0	0
383		0		0		0		0		0		0		0		0		383						0	0						0	0						0	0						0	0
384		0		0		0		0		0		0		0		0		384						0	0						0	0						0	0						0	0
385		0		0		0		0		0		0		0		0		385						0	0						0	0						0	0						0	0
386		0		0		0		0		0		0		0		0		386						0	0						0	0						0	0						0	0
387		0		0		0		0		0		0		0		0		387						0	0						0	0						0	0						0	0
388		0		0		0		0		0		0		0		0		388						0	0						0	0						0	0						0	0
389		0		0		0		0		0		0		0		0		389						0	0						0	0						0	0						0	0
390		0		0		0		0		0		0		0		0		390						0	0						0	0						0	0						0	0	4	1	2
391		0		0		0		0		0		0		0		0		391						0	0						0	0						0	0						0	0
392		0		0		0		0		0		0		0		0		392						0	0						0	0						0	0						0	0
393		0		0		0		0		0		0		0		0		393						0	0						0	0						0	0						0	0
394		0		0		0		0		0		0		0		0		394						0	0						0	0						0	0						0	0
395		0		0		0		0		0		0		0		0		395						0	0						0	0						0	0						0	0
396		0		0		0		0		0		0		0		0		396						0	0						0	0						0	0						0	0
397		0		0		0		0		0		0		0		0		397						0	0						0	0						0	0						0	0
398		0		0		0		0		0		0		0		0		398						0	0						0	0						0	0						0	0
399		0		0		0		0		0		0		0		0		399						0	0						0	0						0	0						0	0
400		0		0		0		0		0		0		0		0		400						0	0						0	0						0	0						0	0
401		0		0		0		0		0		0		0		0		401						0	0						0	0						0	0						0	0
402		0		0		0		0		0		0		0		0		402						0	0						0	0						0	0						0	0
403		0		0		0		0		0		0		0		0		403						0	0						0	0						0	0						0	0
404		0		0		0		0		0		0		0		0		404						0	0						0	0						0	0						0	0
405		0		0		0		0		0		0		0		0		405						0	0						0	0						0	0						0	0
406		0		0		0		0		0		0		0		0		406						0	0						0	0						0	0						0	0
407		0		0		0		0		0		0		0		0		407						0	0						0	0						0	0						0	0
408		0		0		0		0		0		0		0		0		408						0	0						0	0						0	0						0	0
409		0		0		0		0		0		0		0		0		409						0	0						0	0						0	0						0	0
410		0		0		0		0		0		0		0		0		410						0	0						0	0						0	0						0	0	3	4	4
411		0		0		0		0		0		0		0		0		411						0	0						0	0						0	0						0	0
412		0		0		0		0		0		0		0		0		412						0	0						0	0						0	0						0	0
413		0		0		0		0		0		0		0		0		413						0	0						0	0						0	0						0	0
414		0		0		0		0		0		0		0		0		414						0	0						0	0						0	0						0	0
415		0		0		0		0		0		0		0		0		415						0	0						0	0						0	0						0	0
416		0		0		0		0		0		0		0		0		416						0	0						0	0						0	0						0	0
417		0		0		0		0		0		0		0		0		417						0	0						0	0						0	0						0	0
418		0		0		0		0		0		0		0		0		418						0	0						0	0						0	0						0	0
419		0		0		0		0		0		0		0		0		419						0	0						0	0						0	0						0	0
420		0		0		0		0		0		0		0		0		420						0	0						0	0						0	0						0	0
421		0		0		0		0		0		0		0		0		421						0	0						0	0						0	0						0	0
422		0		0		0		0		0		0		0		0		422						0	0						0	0						0	0						0	0
423		0		0		0		0		0		0		0		0		423						0	0						0	0						0	0						0	0
424		0		0		0		0		0		0		0		0		424						0	0						0	0						0	0						0	0
425		0		0		0		0		0		0		0		0		425						0	0						0	0						0	0						0	0
426		0		0		0		0		0		0		0		0		426						0	0						0	0						0	0						0	0
427		0		0		0		0		0		0		0		0		427						0	0						0	0						0	0						0	0
428		0		0		0		0		0		0		0		0		428						0	0						0	0						0	0						0	0
429		0		0		0		0		0		0		0		0		429						0	0						0	0						0	0						0	0
430		0		0		0		0		0		0		0		0		430						0	0						0	0						0	0						0	0		2
431		0		0		0		0		0		0		0		0		431						0	0						0	0						0	0						0	0
432		0		0		0		0		0		0		0		0		432						0	0						0	0						0	0						0	0
433		0		0		0		0		0		0		0		0		433						0	0						0	0						0	0						0	0
434		0		0		0		0		0		0		0		0		434						0	0						0	0						0	0						0	0
435		0		0		0		0		0		0		0		0		435						0	0						0	0						0	0						0	0
436		0		0		0		0		0		0		0		0		436						0	0						0	0						0	0						0	0
437		0		0		0		0		0		0		0		0		437						0	0						0	0						0	0						0	0
438		0		0		0		0		0		0		0		0		438						0	0						0	0						0	0						0	0
439		0		0		0		0		0		0		0		0		439						0	0						0	0						0	0						0	0
440		0		0		0		0		0		0		0		0		440						0	0						0	0						0	0						0	0
441		0		0		0		0		0		0		0		0		441						0	0						0	0						0	0						0	0
442		0		0		0		0		0		0		0		0		442						0	0						0	0						0	0						0	0
443		0		0		0		0		0		0		0		0		443						0	0						0	0						0	0						0	0
444		0		0		0		0		0		0		0		0		444						0	0						0	0						0	0						0	0
445		0		0		0		0		0		0		0		0		445						0	0						0	0						0	0						0	0
446		0		0		0		0		0		0		0		0		446						0	0						0	0						0	0						0	0
447		0		0		0		0		0		0		0		0		447						0	0						0	0						0	0						0	0
448		0		0		0		0		0		0		0		0		448						0	0						0	0						0	0						0	0
449		0		0		0		0		0		0		0		0		449						0	0						0	0						0	0						0	0
450		0		0		0		0		0		0		0		0		450						0	0						0	0						0	0						0	0
451		0		0		0		0		0		0		0		0		451						0	0						0	0						0	0						0	0
452		0		0		0		0		0		0		0		0		452						0	0						0	0						0	0						0	0
453		0		0		0		0		0		0		0		0		453						0	0						0	0						0	0						0	0
454		0		0		0		0		0		0		0		0		454						0	0						0	0						0	0						0	0
455		0		0		0		0		0		0		0		0		455						0	0						0	0						0	0						0	0
456		0		0		0		0		0		0		0		0		456						0	0						0	0						0	0						0	0
457		0		0		0		0		0		0		0		0		457						0	0						0	0						0	0						0	0
458		0		0		0		0		0		0		0		0		458						0	0						0	0						0	0						0	0
459		0		0		0		0		0		0		0		0		459						0	0						0	0						0	0						0	0
460		0		0		0		0		0		0		0		0		460						0	0						0	0						0	0						0	0
461		0		0		0		0		0		0		0		0		461						0	0						0	0						0	0						0	0
462		0		0		0		0		0		0		0		0		462						0	0						0	0						0	0						0	0
463		0		0		0		0		0		0		0		0		463						0	0						0	0						0	0						0	0
464		0		0		0		0		0		0		0		0		464						0	0						0	0						0	0						0	0
465		0		0		0		0		0		0		0		0		465						0	0						0	0						0	0						0	0
466		0		0		0		0		0		0		0		0		466						0	0						0	0						0	0						0	0
467		0		0		0		0		0		0		0		0		467						0	0						0	0						0	0						0	0
468		0		0		0		0		0		0		0		0		468						0	0						0	0						0	0						0	0
469		0		0		0		0		0		0		0		0		469						0	0						0	0						0	0						0	0
470		0		0		0		0		0		0		0		0		470						0	0						0	0						0	0						0	0
471		0		0		0		0		0		0		0		0		471						0	0						0	0						0	0						0	0
472		0		0		0		0		0		0		0		0		472						0	0						0	0						0	0						0	0
473		0		0		0		0		0		0		0		0		473						0	0						0	0						0	0						0	0
474		0		0		0		0		0		0		0		0		474						0	0						0	0						0	0						0	0
475		0		0		0		0		0		0		0		0		475						0	0						0	0						0	0						0	0
476		0		0		0		0		0		0		0		0		476						0	0						0	0						0	0						0	0
477		0		0		0		0		0		0		0		0		477						0	0						0	0						0	0						0	0
478		0		0		0		0		0		0		0		0		478						0	0						0	0						0	0						0	0
479		0		0		0		0		0		0		0		0		479						0	0						0	0						0	0						0	0
480		0		0		0		0		0		0		0		0		480						0	0						0	0						0	0						0	0
481		0		0		0		0		0		0		0		0		481						0	0						0	0						0	0						0	0
482		0		0		0		0		0		0		0		0		482						0	0						0	0						0	0						0	0
483		0		0		0		0		0		0		0		0		483						0	0						0	0						0	0						0	0
484		0		0		0		0		0		0		0		0		484						0	0						0	0						0	0						0	0
485		0		0		0		0		0		0		0		0		485						0	0						0	0						0	0						0	0
486		0		0		0		0		0		0		0		0		486						0	0						0	0						0	0						0	0
487		0		0		0		0		0		0		0		0		487						0	0						0	0						0	0						0	0
488		0		0		0		0		0		0		0		0		488						0	0						0	0						0	0						0	0
489		0		0		0		0		0		0		0		0		489						0	0						0	0						0	0						0	0
490		0		0		0		0		0		0		0		0		490						0	0						0	0						0	0						0	0
491		0		0		0		0		0		0		0		0		491						0	0						0	0						0	0						0	0
492		0		0		0		0		0		0		0		0		492						0	0						0	0						0	0						0	0
493		0		0		0		0		0		0		0		0		493						0	0						0	0						0	0						0	0
494		0		0		0		0		0		0		0		0		494						0	0						0	0						0	0						0	0
495		0		0		0		0		0		0		0		0		495						0	0						0	0						0	0						0	0
496		0		0		0		0		0		0		0		0		496						0	0						0	0						0	0						0	0
497		0		0		0		0		0		0		0		0		497						0	0						0	0						0	0						0	0
498		0		0		0		0		0		0		0		0		498						0	0						0	0						0	0						0	0
499		0		0		0		0		0		0		0		0		499						0	0						0	0						0	0						0	0
500		0		0		0		0		0		0		0		0		500						0	0						0	0						0	0						0	0
501		0		0		0		0		0		0		0		0		501						0	0						0	0						0	0						0	0
502		0		0		0		0		0		0		0		0		502						0	0						0	0						0	0						0	0
503		0		0		0		0		0		0		0		0		503						0	0						0	0						0	0						0	0
504		0		0		0		0		0		0		0		0		504						0	0						0	0						0	0						0	0
505		0		0		0		0		0		0		0		0		505						0	0						0	0						0	0						0	0
506		0		0		0		0		0		0		0		0		506						0	0						0	0						0	0						0	0
507		0		0		0		0		0		0		0		0		507						0	0						0	0						0	0						0	0
508		0		0		0		0		0		0		0		0		508						0	0						0	0						0	0						0	0
509		0		0		0		0		0		0		0		0		509						0	0						0	0						0	0						0	0
510		0		0		0		0		0		0		0		0		510						0	0						0	0						0	0						0	0	5	3	2
511		0		0		0		0		0		0		0		0		511						0	0						0	0						0	0						0	0
512		0		0		0		0		0		0		0		0		512						0	0						0	0						0	0						0	0
513		0		0		0		0		0		0		0		0		513						0	0						0	0						0	0						0	0
514		0		0		0		0		0		0		0		0		514						0	0						0	0						0	0						0	0
515		0		0		0		0		0		0		0		0		515						0	0						0	0						0	0						0	0
516		0		0		0		0		0		0		0		0		516						0	0						0	0						0	0						0	0
517		0		0		0		0		0		0		0		0		517						0	0						0	0						0	0						0	0
518		0		0		0		0		0		0		0		0		518						0	0						0	0						0	0						0	0
519		0		0		0		0		0		0		0		0		519						0	0						0	0						0	0						0	0
520		0		0		0		0		0		0		0		0		520						0	0						0	0						0	0						0	0
521		0		0		0		0		0		0		0		0		521						0	0						0	0						0	0						0	0
522		0		0		0		0		0		0		0		0		522						0	0						0	0						0	0						0	0
523		0		0		0		0		0		0		0		0		523						0	0						0	0						0	0						0	0
524		0		0		0		0		0		0		0		0		524						0	0						0	0						0	0						0	0
525		0		0		0		0		0		0		0		0		525						0	0						0	0						0	0						0	0
526		0		0		0		0		0		0		0		0		526						0	0						0	0						0	0						0	0
527		0		0		0		0		0		0		0		0		527						0	0						0	0						0	0						0	0
528		0		0		0		0		0		0		0		0		528						0	0						0	0						0	0						0	0
529		0		0		0		0		0		0		0		0		529						0	0						0	0						0	0						0	0
530		0		0		0		0		0		0		0		0		530						0	0						0	0						0	0						0	0
531		0		0		0		0		0		0		0		0		531						0	0						0	0						0	0						0	0
532		0		0		0		0		0		0		0		0		532						0	0						0	0						0	0						0	0
533		0		0		0		0		0		0		0		0		533						0	0						0	0						0	0						0	0
534		0		0		0		0		0		0		0		0		534						0	0						0	0						0	0						0	0
535		0		0		0		0		0		0		0		0		535						0	0						0	0						0	0						0	0
536		0		0		0		0		0		0		0		0		536						0	0						0	0						0	0						0	0
537		0		0		0		0		0		0		0		0		537						0	0						0	0						0	0						0	0
538		0		0		0		0		0		0		0		0		538						0	0						0	0						0	0						0	0
539		0		0		0		0		0		0		0		0		539						0	0						0	0						0	0						0	0
540		0		0		0		0		0		0		0		0		540						0	0						0	0						0	0						0	0
541		0		0		0		0		0		0		0		0		541						0	0						0	0						0	0						0	0
542		0		0		0		0		0		0		0		0		542						0	0						0	0						0	0						0	0
543		0		0		0		0		0		0		0		0		543						0	0						0	0						0	0						0	0
544		0		0		0		0		0		0		0		0		544						0	0						0	0						0	0						0	0
545		0		0		0		0		0		0		0		0		545						0	0						0	0						0	0						0	0
546		0		0		0		0		0		0		0		0		546						0	0						0	0						0	0						0	0
547		0		0		0		0		0		0		0		0		547						0	0						0	0						0	0						0	0
548		0		0		0		0		0		0		0		0		548						0	0						0	0						0	0						0	0
549		0		0		0		0		0		0		0		0		549						0	0						0	0						0	0						0	0
550		0		0		0		0		0		0		0		0		550						0	0						0	0						0	0						0	0
551		0		0		0		0		0		0		0		0		551						0	0						0	0						0	0						0	0
552		0		0		0		0		0		0		0		0		552						0	0						0	0						0	0						0	0
553		0		0		0		0		0		0		0		0		553						0	0						0	0						0	0						0	0
554		0		0		0		0		0		0		0		0		554						0	0						0	0						0	0						0	0
555		0		0		0		0		0		0		0		0		555						0	0						0	0						0	0						0	0
556		0		0		0		0		0		0		0		0		556						0	0						0	0						0	0						0	0
557		0		0		0		0		0		0		0		0		557						0	0						0	0						0	0						0	0
558		0		0		0		0		0		0		0		0		558						0	0						0	0						0	0						0	0
559		0		0		0		0		0		0		0		0		559						0	0						0	0						0	0						0	0
560		0		0		0		0		0		0		0		0		560						0	0						0	0						0	0						0	0
561		0		0		0		0		0		0		0		0		561						0	0						0	0						0	0						0	0
562		0		0		0		0		0		0		0		0		562						0	0						0	0						0	0						0	0
563		0		0		0		0		0		0		0		0		563						0	0						0	0						0	0						0	0
564		0		0		0		0		0		0		0		0		564						0	0						0	0						0	0						0	0
565		0		0		0		0		0		0		0		0		565						0	0						0	0						0	0						0	0
566		0		0		0		0		0		0		0		0		566						0	0						0	0						0	0						0	0
567		0		0		0		0		0		0		0		0		567						0	0						0	0						0	0						0	0
568		0		0		0		0		0		0		0		0		568						0	0						0	0						0	0						0	0
569		0		0		0		0		0		0		0		0		569						0	0						0	0						0	0						0	0
570		0		0		0		0		0		0		0		0		570						0	0						0	0						0	0						0	0
571		0		0		0		0		0		0		0		0		571						0	0						0	0						0	0						0	0
572		0		0		0		0		0		0		0		0		572						0	0						0	0						0	0						0	0
573		0		0		0		0		0		0		0		0		573						0	0						0	0						0	0						0	0
574		0		0		0		0		0		0		0		0		574						0	0						0	0						0	0						0	0
575		0		0		0		0		0		0		0		0		575						0	0						0	0						0	0						0	0
576		0		0		0		0		0		0		0		0		576						0	0						0	0						0	0						0	0
577		0		0		0		0		0		0		0		0		577						0	0						0	0						0	0						0	0
578		0		0		0		0		0		0		0		0		578						0	0						0	0						0	0						0	0
579		0		0		0		0		0		0		0		0		579						0	0						0	0						0	0						0	0
580		0		0		0		0		0		0		0		0		580						0	0						0	0						0	0						0	0
581		0		0		0		0		0		0		0		0		581						0	0						0	0						0	0						0	0
582		0		0		0		0		0		0		0		0		582						0	0						0	0						0	0						0	0
583		0		0		0		0		0		0		0		0		583						0	0						0	0						0	0						0	0
584		0		0		0		0		0		0		0		0		584						0	0						0	0						0	0						0	0
585		0		0		0		0		0		0		0		0		585						0	0						0	0						0	0						0	0
586		0		0		0		0		0		0		0		0		586						0	0						0	0						0	0						0	0
587		0		0		0		0		0		0		0		0		587						0	0						0	0						0	0						0	0
588		0		0		0		0		0		0		0		0		588						0	0						0	0						0	0						0	0
589		0		0		0		0		0		0		0		0		589						0	0						0	0						0	0						0	0
590		0		0		0		0		0		0		0		0		590						0	0						0	0						0	0						0	0
591		0		0		0		0		0		0		0		0		591						0	0						0	0						0	0						0	0
592		0		0		0		0		0		0		0		0		592						0	0						0	0						0	0						0	0
593		0		0		0		0		0		0		0		0		593						0	0						0	0						0	0						0	0
594		0		0		0		0		0		0		0		0		594						0	0						0	0						0	0						0	0
595		0		0		0		0		0		0		0		0		595						0	0						0	0						0	0						0	0
596		0		0		0		0		0		0		0		0		596						0	0						0	0						0	0						0	0
597		0		0		0		0		0		0		0		0		597						0	0						0	0						0	0						0	0
598		0		0		0		0		0		0		0		0		598						0	0						0	0						0	0						0	0
599		0		0		0		0		0		0		0		0		599						0	0						0	0						0	0						0	0
600		0		0		0		0		0		0		0		0		600						0	0						0	0						0	0						0	0
601		0		0		0		0		0		0		0		0		601						0	0						0	0						0	0						0	0
602		0		0		0		0		0		0		0		0		602						0	0						0	0						0	0						0	0
603		0		0		0		0		0		0		0		0		603						0	0						0	0						0	0						0	0
604		0		0		0		0		0		0		0		0		604						0	0						0	0						0	0						0	0
605		0		0		0		0		0		0		0		0		605						0	0						0	0						0	0						0	0
606		0		0		0		0		0		0		0		0		606						0	0						0	0						0	0						0	0
607		0		0		0		0		0		0		0		0		607						0	0						0	0						0	0						0	0
608		0		0		0		0		0		0		0		0		608						0	0						0	0						0	0						0	0
609		0		0		0		0		0		0		0		0		609						0	0						0	0						0	0						0	0
610		0		0		0		0		0		0		0		0		610						0	0						0	0						0	0						0	0
611		0		0		0		0		0		0		0		0		611						0	0						0	0						0	0						0	0
612		0		0		0		0		0		0		0		0		612						0	0						0	0						0	0						0	0
613		0		0		0		0		0		0		0		0		613						0	0						0	0						0	0						0	0
614		0		0		0		0		0		0		0		0		614						0	0						0	0						0	0						0	0
615		0		0		0		0		0		0		0		0		615						0	0						0	0						0	0						0	0
616		0		0		0		0		0		0		0		0		616						0	0						0	0						0	0						0	0
617		0		0		0		0		0		0		0		0		617						0	0						0	0						0	0						0	0
618		0		0		0		0		0		0		0		0		618						0	0						0	0						0	0						0	0
619		0		0		0		0		0		0		0		0		619						0	0						0	0						0	0						0	0
620		0		0		0		0		0		0		0		0		620						0	0						0	0						0	0						0	0	5	9	1
621		0		0		0		0		0		0		0		0		621						0	0						0	0						0	0						0	0
622		0		0		0		0		0		0		0		0		622						0	0						0	0						0	0						0	0
623		0		0		0		0		0		0		0		0		623						0	0						0	0						0	0						0	0
624		0		0		0		0		0		0		0		0		624						0	0						0	0						0	0						0	0
625		0		0		0		0		0		0		0		0		625						0	0						0	0						0	0						0	0
626		0		0		0		0		0		0		0		0		626						0	0						0	0						0	0						0	0
627		0		0		0		0		0		0		0		0		627						0	0						0	0						0	0						0	0
628		0		0		0		0		0		0		0		0		628						0	0						0	0						0	0						0	0
629		0		0		0		0		0		0		0		0		629						0	0						0	0						0	0						0	0
630		0		0		0		0		0		0		0		0		630						0	0						0	0						0	0						0	0
631		0		0		0		0		0		0		0		0		631						0	0						0	0						0	0						0	0
632		0		0		0		0		0		0		0		0		632						0	0						0	0						0	0						0	0
633		0		0		0		0		0		0		0		0		633						0	0						0	0						0	0						0	0
634		0		0		0		0		0		0		0		0		634						0	0						0	0						0	0						0	0
635		0		0		0		0		0		0		0		0		635						0	0						0	0						0	0						0	0
636		0		0		0		0		0		0		0		0		636						0	0						0	0						0	0						0	0
637		0		0		0		0		0		0		0		0		637						0	0						0	0						0	0						0	0
638		0		0		0		0		0		0		0		0		638						0	0						0	0						0	0						0	0
639		0		0		0		0		0		0		0		0		639						0	0						0	0						0	0						0	0
640		0		0		0		0		0		0		0		0		640						0	0						0	0						0	0						0	0
641		0		0		0		0		0		0		0		0		641						0	0						0	0						0	0						0	0
642		0		0		0		0		0		0		0		0		642						0	0						0	0						0	0						0	0
643		0		0		0		0		0		0		0		0		643						0	0						0	0						0	0						0	0
644		0		0		0		0		0		0		0		0		644						0	0						0	0						0	0						0	0
645		0		0		0		0		0		0		0		0		645						0	0						0	0						0	0						0	0
646		0		0		0		0		0		0		0		0		646						0	0						0	0						0	0						0	0
647		0		0		0		0		0		0		0		0		647						0	0						0	0						0	0						0	0
648		0		0		0		0		0		0		0		0		648						0	0						0	0						0	0						0	0
649		0		0		0		0		0		0		0		0		649						0	0						0	0						0	0						0	0
650		0		0		0		0		0		0		0		0		650						0	0						0	0						0	0						0	0
651		0		0		0		0		0		0		0		0		651						0	0						0	0						0	0						0	0
652		0		0		0		0		0		0		0		0		652						0	0						0	0						0	0						0	0
653		0		0		0		0		0		0		0		0		653						0	0						0	0						0	0						0	0
654		0		0		0		0		0		0		0		0		654						0	0						0	0						0	0						0	0
655		0		0		0		0		0		0		0		0		655						0	0						0	0						0	0						0	0
656		0		0		0		0		0		0		0		0		656						0	0						0	0						0	0						0	0
657		0		0		0		0		0		0		0		0		657						0	0						0	0						0	0						0	0
658		0		0		0		0		0		0		0		0		658						0	0						0	0						0	0						0	0
659		0		0		0		0		0		0		0		0		659						0	0						0	0						0	0						0	0
660		0		0		0		0		0		0		0		0		660						0	0						0	0						0	0						0	0
661		0		0		0		0		0		0		0		0		661						0	0						0	0						0	0						0	0
662		0		0		0		0		0		0		0		0		662						0	0						0	0						0	0						0	0
663		0		0		0		0		0		0		0		0		663						0	0						0	0						0	0						0	0
664		0		0		0		0		0		0		0		0		664						0	0						0	0						0	0						0	0
665		0		0		0		0		0		0		0		0		665						0	0						0	0						0	0						0	0
666		0		0		0		0		0		0		0		0		666						0	0						0	0						0	0						0	0
667		0		0		0		0		0		0		0		0		667						0	0						0	0						0	0						0	0
668		0		0		0		0		0		0		0		0		668						0	0						0	0						0	0						0	0
669		0		0		0		0		0		0		0		0		669						0	0						0	0						0	0						0	0
670		0		0		0		0		0		0		0		0		670						0	0						0	0						0	0						0	0
671		0		0		0		0		0		0		0		0		671						0	0						0	0						0	0						0	0
672		0		0		0		0		0		0		0		0		672						0	0						0	0						0	0						0	0
673		0		0		0		0		0		0		0		0		673						0	0						0	0						0	0						0	0
674		0		0		0		0		0		0		0		0		674						0	0						0	0						0	0						0	0
675		0		0		0		0		0		0		0		0		675						0	0						0	0						0	0						0	0
676		0		0		0		0		0		0		0		0		676						0	0						0	0						0	0						0	0
677		0		0		0		0		0		0		0		0		677						0	0						0	0						0	0						0	0
678		0		0		0		0		0		0		0		0		678						0	0						0	0						0	0						0	0
679		0		0		0		0		0		0		0		0		679						0	0						0	0						0	0						0	0
680		0		0		0		0		0		0		0		0		680						0	0						0	0						0	0						0	0
681		0		0		0		0		0		0		0		0		681						0	0						0	0						0	0						0	0
682		0		0		0		0		0		0		0		0		682						0	0						0	0						0	0						0	0
683		0		0		0		0		0		0		0		0		683						0	0						0	0						0	0						0	0
684		0		0		0		0		0		0		0		0		684						0	0						0	0						0	0						0	0
685		0		0		0		0		0		0		0		0		685						0	0						0	0						0	0						0	0
686		0		0		0		0		0		0		0		0		686						0	0						0	0						0	0						0	0
687		0		0		0		0		0		0		0		0		687						0	0						0	0						0	0						0	0
688		0		0		0		0		0		0		0		0		688						0	0						0	0						0	0						0	0
689		0		0		0		0		0		0		0		0		689						0	0						0	0						0	0						0	0
690		0		0		0		0		0		0		0		0		690						0	0						0	0						0	0						0	0
691		0		0		0		0		0		0		0		0		691						0	0						0	0						0	0						0	0
692		0		0		0		0		0		0		0		0		692						0	0						0	0						0	0						0	0
693		0		0		0		0		0		0		0		0		693						0	0						0	0						0	0						0	0
694		0		0		0		0		0		0		0		0		694						0	0						0	0						0	0						0	0
695		0		0		0		0		0		0		0		0		695						0	0						0	0						0	0						0	0
696		0		0		0		0		0		0		0		0		696						0	0						0	0						0	0						0	0
697		0		0		0		0		0		0		0		0		697						0	0						0	0						0	0						0	0
698		0		0		0		0		0		0		0		0		698						0	0						0	0						0	0						0	0
699		0		0		0		0		0		0		0		0		699						0	0						0	0						0	0						0	0
700		0		0		0		0		0		0		0		0		700						0	0						0	0						0	0						0	0
701		0		0		0		0		0		0		0		0		701						0	0						0	0						0	0						0	0
702		0		0		0		0		0		0		0		0		702						0	0						0	0						0	0						0	0
703		0		0		0		0		0		0		0		0		703						0	0						0	0						0	0						0	0
704		0		0		0		0		0		0		0		0		704						0	0						0	0						0	0						0	0
705		0		0		0		0		0		0		0		0		705						0	0						0	0						0	0						0	0
706		0		0		0		0		0		0		0		0		706						0	0						0	0						0	0						0	0
707		0		0		0		0		0		0		0		0		707						0	0						0	0						0	0						0	0
708		0		0		0		0		0		0		0		0		708						0	0						0	0						0	0						0	0
709		0		0		0		0		0		0		0		0		709						0	0						0	0						0	0						0	0
710		0		0		0		0		0		0		0		0		710						0	0						0	0						0	0						0	0
711		0		0		0		0		0		0		0		0		711						0	0						0	0						0	0						0	0
712		0		0		0		0		0		0		0		0		712						0	0						0	0						0	0						0	0
713		0		0		0		0		0		0		0		0		713						0	0						0	0						0	0						0	0
714		0		0		0		0		0		0		0		0		714						0	0						0	0						0	0						0	0
715		0		0		0		0		0		0		0		0		715						0	0						0	0						0	0						0	0
716		0		0		0		0		0		0		0		0		716						0	0						0	0						0	0						0	0
717		0		0		0		0		0		0		0		0		717						0	0						0	0						0	0						0	0
718		0		0		0		0		0		0		0		0		718						0	0						0	0						0	0						0	0
719		0		0		0		0		0		0		0		0		719						0	0						0	0						0	0						0	0
720		0		0		0		0		0		0		0		0		720						0	0						0	0						0	0						0	0	1		2
721		0		0		0		0		0		0		0		0		721						0	0						0	0						0	0						0	0
722		0		0		0		0		0		0		0		0		722						0	0						0	0						0	0						0	0
723		0		0		0		0		0		0		0		0		723						0	0						0	0						0	0						0	0
724		0		0		0		0		0		0		0		0		724						0	0						0	0						0	0						0	0
725		0		0		0		0		0		0		0		0		725						0	0						0	0						0	0						0	0
726		0		0		0		0		0		0		0		0		726						0	0						0	0						0	0						0	0
727		0		0		0		0		0		0		0		0		727						0	0						0	0						0	0						0	0
728		0		0		0		0		0		0		0		0		728						0	0						0	0						0	0						0	0
729		0		0		0		0		0		0		0		0		729						0	0						0	0						0	0						0	0
730		0		0		0		0		0		0		0		0		730						0	0						0	0						0	0						0	0
731		0		0		0		0		0		0		0		0		731						0	0						0	0						0	0						0	0
732		0		0		0		0		0		0		0		0		732						0	0						0	0						0	0						0	0
733		0		0		0		0		0		0		0		0		733						0	0						0	0						0	0						0	0
734		0		0		0		0		0		0		0		0		734						0	0						0	0						0	0						0	0
735		0		0		0		0		0		0		0		0		735						0	0						0	0						0	0						0	0
736		0		0		0		0		0		0		0		0		736						0	0						0	0						0	0						0	0
737		0		0		0		0		0		0		0		0		737						0	0						0	0						0	0						0	0
738		0		0		0		0		0		0		0		0		738						0	0						0	0						0	0						0	0
739		0		0		0		0		0		0		0		0		739						0	0						0	0						0	0						0	0
740		0		0		0		0		0		0		0		0		740						0	0						0	0						0	0						0	0
741		0		0		0		0		0		0		0		0		741						0	0						0	0						0	0						0	0
742		0		0		0		0		0		0		0		0		742						0	0						0	0						0	0						0	0
743		0		0		0		0		0		0		0		0		743						0	0						0	0						0	0						0	0
744		0		0		0		0		0		0		0		0		744						0	0						0	0						0	0						0	0
745		0		0		0		0		0		0		0		0		745						0	0						0	0						0	0						0	0
746		0		0		0		0		0		0		0		0		746						0	0						0	0						0	0						0	0
747		0		0		0		0		0		0		0		0		747						0	0						0	0						0	0						0	0
748		0		0		0		0		0		0		0		0		748						0	0						0	0						0	0						0	0
749		0		0		0		0		0		0		0		0		749						0	0						0	0						0	0						0	0
750		0		0		0		0		0		0		0		0		750						0	0						0	0						0	0						0	0
751		0		0		0		0		0		0		0		0		751						0	0						0	0						0	0						0	0
752		0		0		0		0		0		0		0		0		752						0	0						0	0						0	0						0	0
753		0		0		0		0		0		0		0		0		753						0	0						0	0						0	0						0	0
754		0		0		0		0		0		0		0		0		754						0	0						0	0						0	0						0	0
755		0		0		0		0		0		0		0		0		755						0	0						0	0						0	0						0	0
756		0		0		0		0		0		0		0		0		756						0	0						0	0						0	0						0	0
757		0		0		0		0		0		0		0		0		757						0	0						0	0						0	0						0	0
758		0		0		0		0		0		0		0		0		758						0	0						0	0						0	0						0	0
759		0		0		0		0		0		0		0		0		759						0	0						0	0						0	0						0	0
760		0		0		0		0		0		0		0		0		760						0	0						0	0						0	0						0	0
761		0		0		0		0		0		0		0		0		761						0	0						0	0						0	0						0	0
762		0		0		0		0		0		0		0		0		762						0	0						0	0						0	0						0	0
763		0		0		0		0		0		0		0		0		763						0	0						0	0						0	0						0	0
764		0		0		0		0		0		0		0		0		764						0	0						0	0						0	0						0	0
765		0		0		0		0		0		0		0		0		765						0	0						0	0						0	0						0	0
766		0		0		0		0		0		0		0		0		766						0	0						0	0						0	0						0	0
767		0		0		0		0		0		0		0		0		767						0	0						0	0						0	0						0	0
768		0		0		0		0		0		0		0		0		768						0	0						0	0						0	0						0	0
769		0		0		0		0		0		0		0		0		769						0	0						0	0						0	0						0	0
770		0		0		0		0		0		0		0		0		770						0	0						0	0						0	0						0	0
771		0		0		0		0		0		0		0		0		771						0	0						0	0						0	0						0	0
772		0		0		0		0		0		0		0		0		772						0	0						0	0						0	0						0	0
773		0		0		0		0		0		0		0		0		773						0	0						0	0						0	0						0	0
774		0		0		0		0		0		0		0		0		774						0	0						0	0						0	0						0	0
775		0		0		0		0		0		0		0		0		775						0	0						0	0						0	0						0	0
776		0		0		0		0		0		0		0		0		776						0	0						0	0						0	0						0	0
777		0		0		0		0		0		0		0		0		777						0	0						0	0						0	0						0	0
778		0		0		0		0		0		0		0		0		778						0	0						0	0						0	0						0	0
779		0		0		0		0		0		0		0		0		779						0	0						0	0						0	0						0	0
780		0		0		0		0		0		0		0		0		780						0	0						0	0						0	0						0	0
781		0		0		0		0		0		0		0		0		781						0	0						0	0						0	0						0	0
782		0		0		0		0		0		0		0		0		782						0	0						0	0						0	0						0	0
783		0		0		0		0		0		0		0		0		783						0	0						0	0						0	0						0	0
784		0		0		0		0		0		0		0		0		784						0	0						0	0						0	0						0	0
785		0		0		0		0		0		0		0		0		785						0	0						0	0						0	0						0	0
786		0		0		0		0		0		0		0		0		786						0	0						0	0						0	0						0	0
787		0		0		0		0		0		0		0		0		787						0	0						0	0						0	0						0	0
788		0		0		0		0		0		0		0		0		788						0	0						0	0						0	0						0	0
789		0		0		0		0		0		0		0		0		789						0	0						0	0						0	0						0	0
790		0		0		0		0		0		0		0		0		790						0	0						0	0						0	0						0	0
791		0		0		0		0		0		0		0		0		791						0	0						0	0						0	0						0	0
792		0		0		0		0		0		0		0		0		792						0	0						0	0						0	0						0	0
793		0		0		0		0		0		0		0		0		793						0	0						0	0						0	0						0	0
794		0		0		0		0		0		0		0		0		794						0	0						0	0						0	0						0	0
795		0		0		0		0		0		0		0		0		795						0	0						0	0						0	0						0	0
796		0		0		0		0		0		0		0		0		796						0	0						0	0						0	0						0	0
797		0		0		0		0		0		0		0		0		797						0	0						0	0						0	0						0	0
798		0		0		0		0		0		0		0		0		798						0	0						0	0						0	0						0	0
799		0		0		0		0		0		0		0		0		799						0	0						0	0						0	0						0	0
800		0		0		0		0		0		0		0		0		800						0	0						0	0						0	0						0	0
801		0		0		0		0		0		0		0		0		801						0	0						0	0						0	0						0	0
802		0		0		0		0		0		0		0		0		802						0	0						0	0						0	0						0	0
803		0		0		0		0		0		0		0		0		803						0	0						0	0						0	0						0	0
804		0		0		0		0		0		0		0		0		804						0	0						0	0						0	0						0	0
805		0		0		0		0		0		0		0		0		805						0	0						0	0						0	0						0	0
806		0		0		0		0		0		0		0		0		806						0	0						0	0						0	0						0	0
807		0		0		0		0		0		0		0		0		807						0	0						0	0						0	0						0	0
808		0		0		0		0		0		0		0		0		808						0	0						0	0						0	0						0	0
809		0		0		0		0		0		0		0		0		809						0	0						0	0						0	0						0	0
810		0		0		0		0		0		0		0		0		810						0	0						0	0						0	0						0	0
811		0		0		0		0		0		0		0		0		811						0	0						0	0						0	0						0	0
812		0		0		0		0		0		0		0		0		812						0	0						0	0						0	0						0	0
813		0		0		0		0		0		0		0		0		813						0	0						0	0						0	0						0	0
814		0		0		0		0		0		0		0		0		814						0	0						0	0						0	0						0	0
815		0		0		0		0		0		0		0		0		815						0	0						0	0						0	0						0	0
816		0		0		0		0		0		0		0		0		816						0	0						0	0						0	0						0	0
817		0		0		0		0		0		0		0		0		817						0	0						0	0						0	0						0	0
818		0		0		0		0		0		0		0		0		818						0	0						0	0						0	0						0	0
819		0		0		0		0		0		0		0		0		819						0	0						0	0						0	0						0	0
820		0		0		0		0		0		0		0		0		820						0	0						0	0						0	0						0	0
821		0		0		0		0		0		0		0		0		821						0	0						0	0						0	0						0	0
822		0		0		0		0		0		0		0		0		822						0	0						0	0						0	0						0	0
823		0		0		0		0		0		0		0		0		823						0	0						0	0						0	0						0	0
824		0		0		0		0		0		0		0		0		824						0	0						0	0						0	0						0	0
825		0		0		0		0		0		0		0		0		825						0	0						0	0						0	0						0	0
826		0		0		0		0		0		0		0		0		826						0	0						0	0						0	0						0	0
827		0		0		0		0		0		0		0		0		827						0	0						0	0						0	0						0	0
828		0		0		0		0		0		0		0		0		828						0	0						0	0						0	0						0	0
829		0		0		0		0		0		0		0		0		829						0	0						0	0						0	0						0	0
830		0		0		0		0		0		0		0		0		830						0	0						0	0						0	0						0	0
831		0		0		0		0		0		0		0		0		831						0	0						0	0						0	0						0	0
832		0		0		0		0		0		0		0		0		832						0	0						0	0						0	0						0	0
833		0		0		0		0		0		0		0		0		833						0	0						0	0						0	0						0	0
834		0		0		0		0		0		0		0		0		834						0	0						0	0						0	0						0	0
835		0		0		0		0		0		0		0		0		835						0	0						0	0						0	0						0	0
836		0		0		0		0		0		0		0		0		836						0	0						0	0						0	0						0	0
837		0		0		0		0		0		0		0		0		837						0	0						0	0						0	0						0	0
838		0		0		0		0		0		0		0		0		838						0	0						0	0						0	0						0	0
839		0		0		0		0		0		0		0		0		839						0	0						0	0						0	0						0	0
840		0		0		0		0		0		0		0		0		840						0	0						0	0						0	0						0	0
841		0		0		0		0		0		0		0		0		841						0	0						0	0						0	0						0	0
842		0		0		0		0		0		0		0		0		842						0	0						0	0						0	0						0	0
843		0		0		0		0		0		0		0		0		843						0	0						0	0						0	0						0	0
844		0		0		0		0		0		0		0		0		844						0	0						0	0						0	0						0	0
845		0		0		0		0		0		0		0		0		845						0	0						0	0						0	0						0	0
846		0		0		0		0		0		0		0		0		846						0	0						0	0						0	0						0	0
847		0		0		0		0		0		0		0		0		847						0	0						0	0						0	0						0	0
848		0		0		0		0		0		0		0		0		848						0	0						0	0						0	0						0	0
849		0		0		0		0		0		0		0		0		849						0	0						0	0						0	0						0	0
850		0		0		0		0		0		0		0		0		850						0	0						0	0						0	0						0	0
851		0		0		0		0		0		0		0		0		851						0	0						0	0						0	0						0	0
852		0		0		0		0		0		0		0		0		852						0	0						0	0						0	0						0	0
853		0		0		0		0		0		0		0		0		853						0	0						0	0						0	0						0	0
854		0		0		0		0		0		0		0		0		854						0	0						0	0						0	0						0	0
855		0		0		0		0		0		0		0		0		855						0	0						0	0						0	0						0	0
856		0		0		0		0		0		0		0		0		856						0	0						0	0						0	0						0	0
857		0		0		0		0		0		0		0		0		857						0	0						0	0						0	0						0	0
858		0		0		0		0		0		0		0		0		858						0	0						0	0						0	0						0	0
859		0		0		0		0		0		0		0		0		859						0	0						0	0						0	0						0	0
860		0		0		0		0		0		0		0		0		860						0	0						0	0						0	0						0	0
861		0		0		0		0		0		0		0		0		861						0	0						0	0						0	0						0	0
862		0		0		0		0		0		0		0		0		862						0	0						0	0						0	0						0	0
863		0		0		0		0		0		0		0		0		863						0	0						0	0						0	0						0	0
864		0		0		0		0		0		0		0		0		864						0	0						0	0						0	0						0	0
865		0		0		0		0		0		0		0		0		865						0	0						0	0						0	0						0	0
866		0		0		0		0		0		0		0		0		866						0	0						0	0						0	0						0	0
867		0		0		0		0		0		0		0		0		867						0	0						0	0						0	0						0	0
868		0		0		0		0		0		0		0		0		868						0	0						0	0						0	0						0	0
869		0		0		0		0		0		0		0		0		869						0	0						0	0						0	0						0	0
870		0		0		0		0		0		0		0		0		870						0	0						0	0						0	0						0	0
871		0		0		0		0		0		0		0		0		871						0	0						0	0						0	0						0	0
872		0		0		0		0		0		0		0		0		872						0	0						0	0						0	0						0	0
873		0		0		0		0		0		0		0		0		873						0	0						0	0						0	0						0	0
874		0		0		0		0		0		0		0		0		874						0	0						0	0						0	0						0	0
875		0		0		0		0		0		0		0		0		875						0	0						0	0						0	0						0	0
876		0		0		0		0		0		0		0		0		876						0	0						0	0						0	0						0	0
877		0		0		0		0		0		0		0		0		877						0	0						0	0						0	0						0	0
878		0		0		0		0		0		0		0		0		878						0	0						0	0						0	0						0	0
879		0		0		0		0		0		0		0		0		879						0	0						0	0						0	0						0	0
880		0		0		0		0		0		0		0		0		880						0	0						0	0						0	0						0	0
881		0		0		0		0		0		0		0		0		881						0	0						0	0						0	0						0	0
882		0		0		0		0		0		0		0		0		882						0	0						0	0						0	0						0	0
883		0		0		0		0		0		0		0		0		883						0	0						0	0						0	0						0	0
884		0		0		0		0		0		0		0		0		884						0	0						0	0						0	0						0	0
885		0		0		0		0		0		0		0		0		885						0	0						0	0						0	0						0	0
886		0		0		0		0		0		0		0		0		886						0	0						0	0						0	0						0	0
887		0		0		0		0		0		0		0		0		887						0	0						0	0						0	0						0	0
888		0		0		0		0		0		0		0		0		888						0	0						0	0						0	0						0	0
889		0		0		0		0		0		0		0		0		889						0	0						0	0						0	0						0	0
890		0		0		0		0		0		0		0		0		890						0	0						0	0						0	0						0	0
891		0		0		0		0		0		0		0		0		891						0	0						0	0						0	0						0	0
892		0		0		0		0		0		0		0		0		892						0	0						0	0						0	0						0	0
893		0		0		0		0		0		0		0		0		893						0	0						0	0						0	0						0	0
894		0		0		0		0		0		0		0		0		894						0	0						0	0						0	0						0	0
895		0		0		0		0		0		0		0		0		895						0	0						0	0						0	0						0	0
896		0		0		0		0		0		0		0		0		896						0	0						0	0						0	0						0	0
897		0		0		0		0		0		0		0		0		897						0	0						0	0						0	0						0	0
898		0		0		0		0		0		0		0		0		898						0	0						0	0						0	0						0	0
899		0		0		0		0		0		0		0		0		899						0	0						0	0						0	0						0	0
900		0		0		0		0		0		0		0		0		900						0	0						0	0						0	0						0	0
901		0		0		0		0		0		0		0		0		901						0	0						0	0						0	0						0	0
902		0		0		0		0		0		0		0		0		902						0	0						0	0						0	0						0	0
903		0		0		0		0		0		0		0		0		903						0	0						0	0						0	0						0	0
904		0		0		0		0		0		0		0		0		904						0	0						0	0						0	0						0	0
905		0		0		0		0		0		0		0		0		905						0	0						0	0						0	0						0	0
906		0		0		0		0		0		0		0		0		906						0	0						0	0						0	0						0	0
907		0		0		0		0		0		0		0		0		907						0	0						0	0						0	0						0	0
908		0		0		0		0		0		0		0		0		908						0	0						0	0						0	0						0	0
909		0		0		0		0		0		0		0		0		909						0	0						0	0						0	0						0	0
910		0		0		0		0		0	1	910		0		0		910						0	0						0	0						0	0						0	0
911		0		0		0		0		0		0		0		0		911						0	0						0	0						0	0						0	0
912		0		0		0		0		0		0		0		0		912						0	0						0	0						0	0						0	0
913		0		0		0		0		0		0		0		0		913						0	0						0	0						0	0						0	0
914		0		0		0		0		0		0		0		0		914						0	0						0	0						0	0						0	0
915		0		0		0		0		0		0		0		0		915						0	0						0	0						0	0						0	0
916		0		0		0		0		0		0		0		0		916						0	0						0	0						0	0						0	0
917		0		0		0		0		0		0		0		0		917						0	0						0	0						0	0						0	0
918		0		0		0		0		0		0		0		0		918						0	0						0	0						0	0						0	0
919		0		0		0		0		0		0		0		0		919						0	0						0	0						0	0						0	0
920		0		0		0		0		0		0		0		0		920						0	0						0	0						0	0						0	0
921		0		0		0		0		0		0		0		0		921						0	0						0	0						0	0						0	0
922		0		0		0		0		0		0		0		0		922						0	0						0	0						0	0						0	0
923		0		0		0		0		0		0		0		0		923						0	0						0	0						0	0						0	0
924		0		0		0		0		0		0		0		0		924						0	0						0	0						0	0						0	0
925		0		0		0		0		0		0		0		0		925						0	0						0	0						0	0						0	0
926		0		0		0		0		0		0		0		0		926						0	0						0	0						0	0						0	0
927		0		0		0		0		0		0		0		0		927						0	0						0	0						0	0						0	0
928		0		0		0		0		0		0		0		0		928						0	0						0	0						0	0						0	0
929		0		0		0		0		0		0		0		0		929						0	0						0	0						0	0						0	0
930		0		0		0		0		0		0		0		0		930						0	0						0	0						0	0						0	0
931		0		0		0		0		0		0		0		0		931						0	0						0	0						0	0						0	0
932		0		0		0		0		0		0		0		0		932						0	0						0	0						0	0						0	0
933		0		0		0		0		0		0		0		0		933						0	0						0	0						0	0						0	0
934		0		0		0		0		0		0		0		0		934						0	0						0	0						0	0						0	0
935		0		0		0		0		0		0		0		0		935						0	0						0	0						0	0						0	0
936		0		0		0		0		0		0		0		0		936						0	0						0	0						0	0						0	0
937		0		0		0		0		0		0		0		0		937						0	0						0	0						0	0						0	0
938		0		0		0		0		0		0		0		0		938						0	0						0	0						0	0						0	0
939		0		0		0		0		0		0		0		0		939						0	0						0	0						0	0						0	0
940		0		0		0		0		0		0		0		0		940						0	0						0	0						0	0						0	0
941		0		0		0		0		0		0		0		0		941						0	0						0	0						0	0						0	0
942		0		0		0		0		0		0		0		0		942						0	0						0	0						0	0						0	0
943		0		0		0		0		0		0		0		0		943						0	0						0	0						0	0						0	0
944		0		0		0		0		0		0		0		0		944						0	0						0	0						0	0						0	0
945		0		0		0		0		0		0		0		0		945						0	0						0	0						0	0						0	0
946		0		0		0		0		0		0		0		0		946						0	0						0	0						0	0						0	0
947		0		0		0		0		0		0		0		0		947						0	0						0	0						0	0						0	0
948		0		0		0		0		0		0		0		0		948						0	0						0	0						0	0						0	0
949		0		0		0		0		0		0		0		0		949						0	0						0	0						0	0						0	0
950		0		0		0		0		0		0		0		0		950						0	0						0	0						0	0						0	0
951		0		0		0		0		0		0		0		0		951						0	0						0	0						0	0						0	0
952		0		0		0		0		0		0		0		0		952						0	0						0	0						0	0						0	0
953		0		0		0		0		0		0		0		0		953						0	0						0	0						0	0						0	0
954		0		0		0		0		0		0		0		0		954						0	0						0	0						0	0						0	0
955		0		0		0		0		0		0		0		0		955						0	0						0	0						0	0						0	0
956		0		0		0		0		0		0		0		0		956						0	0						0	0						0	0						0	0
957		0		0		0		0		0		0		0		0		957						0	0						0	0						0	0						0	0
958		0		0		0		0		0		0		0		0		958						0	0						0	0						0	0						0	0
959		0		0		0		0		0		0		0		0		959						0	0						0	0						0	0						0	0
960		0		0		0		0		0		0		0		0		960						0	0						0	0						0	0						0	0
961		0		0		0		0		0		0		0		0		961						0	0						0	0						0	0						0	0
962		0		0		0		0		0		0		0		0		962						0	0						0	0						0	0						0	0
963		0		0		0		0		0		0		0		0		963						0	0						0	0						0	0						0	0
964		0		0		0		0		0		0		0		0		964						0	0						0	0						0	0						0	0
965		0		0		0		0		0		0		0		0		965						0	0						0	0						0	0						0	0
966		0		0		0		0		0		0		0		0		966						0	0						0	0						0	0						0	0
967		0		0		0		0		0		0		0		0		967						0	0						0	0						0	0						0	0
968		0		0		0		0		0		0		0		0		968						0	0						0	0						0	0						0	0
969		0		0		0		0		0		0		0		0		969						0	0						0	0						0	0						0	0
970		0		0		0		0		0		0		0		0		970						0	0						0	0						0	0						0	0
971		0		0		0		0		0		0		0		0		971						0	0						0	0						0	0						0	0
972		0		0		0		0		0		0		0		0		972						0	0						0	0						0	0						0	0
973		0		0		0		0		0		0		0		0		973						0	0						0	0						0	0						0	0
974		0		0		0		0		0		0		0		0		974						0	0						0	0						0	0						0	0
975		0		0		0		0		0		0		0		0		975						0	0						0	0						0	0						0	0
976		0		0		0		0		0		0		0		0		976						0	0						0	0						0	0						0	0
977		0		0		0		0		0		0		0		0		977						0	0						0	0						0	0						0	0
978		0		0		0		0		0		0		0		0		978						0	0						0	0						0	0						0	0
979		0		0		0		0		0		0		0		0		979						0	0						0	0						0	0						0	0
980		0		0		0		0		0		0		0		0		980						0	0						0	0						0	0						0	0
981		0		0		0		0		0		0		0		0		981						0	0						0	0						0	0						0	0
982		0		0		0		0		0		0		0		0		982						0	0						0	0						0	0						0	0
983		0		0		0		0		0		0		0		0		983						0	0						0	0						0	0						0	0
984		0		0		0		0		0		0		0		0		984						0	0						0	0						0	0						0	0
985		0		0		0		0		0		0		0		0		985						0	0						0	0						0	0						0	0
986		0		0		0		0		0		0		0		0		986						0	0						0	0						0	0						0	0
987		0		0		0		0		0		0		0		0		987						0	0						0	0						0	0						0	0
988		0		0		0		0		0		0		0		0		988						0	0						0	0						0	0						0	0
989		0		0		0		0		0		0		0		0		989						0	0						0	0						0	0						0	0
990		0		0		0		0		0		0		0		0		990						0	0						0	0						0	0						0	0
991		0		0		0		0		0		0		0		0		991						0	0						0	0						0	0						0	0
992		0		0		0		0		0		0		0		0		992						0	0						0	0						0	0						0	0
993		0		0		0		0		0		0		0		0		993						0	0						0	0						0	0						0	0
994		0		0		0		0		0		0		0		0		994						0	0						0	0						0	0						0	0
995		0		0		0		0		0		0		0		0		995						0	0						0	0						0	0						0	0
996		0		0		0		0		0		0		0		0		996						0	0						0	0						0	0						0	0
997		0		0		0		0		0		0		0		0		997						0	0						0	0						0	0						0	0
998		0		0		0		0		0		0		0		0		998						0	0						0	0						0	0						0	0
999		0		0		0		0		0		0		0		0		999						0	0						0	0						0	0						0	0
1000		0		0		0		0		0		0		0		0		1000						0	0						0	0						0	0						0	0
1001		0		0		0		0		0		0		0		0		1001						0	0						0	0						0	0						0	0
1002		0		0		0		0		0		0		0		0		1002						0	0						0	0						0	0						0	0
1003		0		0		0		0		0		0		0		0		1003						0	0						0	0						0	0						0	0
1004		0		0		0		0		0		0		0		0		1004						0	0						0	0						0	0						0	0
1005		0		0		0		0		0		0		0		0		1005						0	0						0	0						0	0						0	0
1006		0		0		0		0		0		0		0		0		1006						0	0						0	0						0	0						0	0
1007		0		0		0		0		0		0		0		0		1007						0	0						0	0						0	0						0	0
1008		0		0		0		0		0		0		0		0		1008						0	0						0	0						0	0						0	0
1009		0		0		0		0		0		0		0		0		1009						0	0						0	0						0	0						0	0
1010		0		0		0		0		0		0		0		0		1010						0	0						0	0						0	0						0	0
1011		0		0		0		0		0		0		0		0		1011						0	0						0	0						0	0						0	0
1012		0		0		0		0		0		0		0		0		1012						0	0						0	0						0	0						0	0
1013		0		0		0		0		0		0		0		0		1013						0	0						0	0						0	0						0	0
1014		0		0		0		0		0		0		0		0		1014						0	0						0	0						0	0						0	0
1015		0		0		0		0		0		0		0		0		1015						0	0						0	0						0	0						0	0
1016		0		0		0		0		0		0		0		0		1016						0	0						0	0						0	0						0	0
1017		0		0		0		0		0		0		0		0		1017						0	0						0	0						0	0						0	0
1018		0		0		0		0		0		0		0		0		1018						0	0						0	0						0	0						0	0
1019		0		0		0		0		0		0		0		0		1019						0	0						0	0						0	0						0	0
1020		0		0		0		0		0		0		0		0		1020						0	0						0	0						0	0						0	0
1021		0		0		0		0		0		0		0		0		1021						0	0						0	0						0	0						0	0
1022		0		0		0		0		0		0		0		0		1022						0	0						0	0						0	0						0	0
1023		0		0		0		0		0		0		0		0		1023						0	0						0	0						0	0						0	0
1024		0		0		0		0		0		0		0		0		1024						0	0						0	0						0	0						0	0
1025		0		0		0		0		0		0		0		0		1025						0	0						0	0						0	0						0	0
1026		0		0		0		0		0		0		0		0		1026						0	0						0	0						0	0						0	0
1027		0		0		0		0		0		0		0		0		1027						0	0						0	0						0	0						0	0
1028		0		0		0		0		0		0		0		0		1028						0	0						0	0						0	0						0	0
1029		0		0		0		0		0		0		0		0		1029						0	0						0	0						0	0						0	0
1030		0		0		0		0	1	1030		0		0		0		1030						0	0						0	0						0	0						0	0
1031		0		0		0		0		0		0		0		0		1031						0	0						0	0						0	0						0	0
1032		0		0		0		0		0		0		0		0		1032						0	0						0	0						0	0						0	0
1033		0		0		0		0		0		0		0		0		1033						0	0						0	0						0	0						0	0
1034		0		0		0		0		0		0		0		0		1034						0	0						0	0						0	0						0	0
1035		0		0		0		0		0		0		0		0		1035						0	0						0	0						0	0						0	0
1036		0		0		0		0		0		0		0		0		1036						0	0						0	0						0	0						0	0
1037		0		0		0		0		0		0		0		0		1037						0	0						0	0						0	0						0	0
1038		0		0		0		0		0		0		0		0		1038						0	0						0	0						0	0						0	0
1039		0		0		0		0		0		0		0		0		1039						0	0						0	0						0	0						0	0
1040		0		0		0		0		0		0		0		0		1040						0	0						0	0						0	0						0	0
1041		0		0		0		0		0		0		0		0		1041						0	0						0	0						0	0						0	0
1042		0		0		0		0		0		0		0		0		1042						0	0						0	0						0	0						0	0
1043		0		0		0		0		0		0		0		0		1043						0	0						0	0						0	0						0	0
1044		0		0		0		0		0		0		0		0		1044						0	0						0	0						0	0						0	0
1045		0		0		0		0		0		0		0		0		1045						0	0						0	0						0	0						0	0
1046		0		0		0		0		0		0		0		0		1046						0	0						0	0						0	0						0	0
1047		0		0		0		0		0		0		0		0		1047						0	0						0	0						0	0						0	0
1048		0		0		0		0		0		0		0		0		1048						0	0						0	0						0	0						0	0
1049		0		0		0		0		0		0		0		0		1049						0	0						0	0						0	0						0	0
1050		0		0		0		0		0		0		0		0		1050						0	0						0	0						0	0						0	0
1051		0		0		0		0		0		0		0		0		1051						0	0						0	0						0	0						0	0
1052		0		0		0		0		0		0		0		0		1052						0	0						0	0						0	0						0	0
1053		0		0		0		0		0		0		0		0		1053						0	0						0	0						0	0						0	0
1054		0		0		0		0		0		0		0		0		1054						0	0						0	0						0	0						0	0
1055		0		0		0		0		0		0		0		0		1055						0	0						0	0						0	0						0	0
1056		0		0		0		0		0		0		0		0		1056						0	0						0	0						0	0						0	0
1057		0		0		0		0		0		0		0		0		1057						0	0						0	0						0	0						0	0
1058		0		0		0		0		0		0		0		0		1058						0	0						0	0						0	0						0	0
1059		0		0		0		0		0		0		0		0		1059						0	0						0	0						0	0						0	0
1060		0		0		0		0		0		0		0		0		1060						0	0						0	0						0	0						0	0	102	115	113
1061		0		0		0		0		0		0		0		0		1061						0	0						0	0						0	0						0	0
1062		0		0		0		0		0		0		0		0		1062						0	0						0	0						0	0						0	0
1063		0		0		0		0		0		0		0		0		1063						0	0						0	0						0	0						0	0
1064		0		0		0		0		0		0		0		0		1064						0	0						0	0						0	0						0	0
1065		0		0		0		0		0		0		0		0		1065						0	0						0	0						0	0						0	0
1066		0		0		0		0		0		0		0		0		1066						0	0						0	0						0	0						0	0
1067		0		0		0		0		0		0		0		0		1067						0	0						0	0						0	0						0	0
1068		0		0		0		0		0		0		0		0		1068						0	0						0	0						0	0						0	0
1069		0		0		0		0		0		0		0		0		1069						0	0						0	0						0	0						0	0
1070		0		0		0		0		0		0		0		0		1070						0	0						0	0						0	0						0	0
1071		0		0		0		0		0		0		0		0		1071						0	0						0	0						0	0						0	0
1072		0		0		0		0		0		0		0		0		1072						0	0						0	0						0	0						0	0
1073		0		0		0		0		0		0		0		0		1073						0	0						0	0						0	0						0	0
1074		0		0		0		0		0		0		0		0		1074						0	0						0	0						0	0						0	0
1075		0		0		0		0		0		0		0		0		1075						0	0						0	0						0	0						0	0
1076		0		0		0		0		0		0		0		0		1076						0	0						0	0						0	0						0	0
1077		0		0		0		0		0		0		0		0		1077						0	0						0	0						0	0						0	0
1078		0		0		0		0		0		0		0		0		1078						0	0						0	0						0	0						0	0
1079		0		0		0		0		0		0		0		0		1079						0	0						0	0						0	0						0	0
1080		0		0		0		0	1	1080		0		0		0		1080						0	0						0	0						0	0						0	0
1081		0		0		0		0		0		0		0		0		1081						0	0						0	0						0	0						0	0
1082		0		0		0		0		0		0		0		0		1082						0	0						0	0						0	0						0	0
1083		0		0		0		0		0		0		0		0		1083						0	0						0	0						0	0						0	0
1084		0		0		0		0		0		0		0		0		1084						0	0						0	0						0	0						0	0
1085		0		0		0		0		0		0		0		0		1085						0	0						0	0						0	0						0	0
1086		0		0		0		0		0		0		0		0		1086						0	0						0	0						0	0						0	0
1087		0		0		0		0		0		0		0		0		1087						0	0						0	0						0	0						0	0
1088		0		0		0		0		0		0		0		0		1088						0	0						0	0						0	0						0	0
1089		0		0		0		0		0		0		0		0		1089						0	0						0	0						0	0						0	0
1090		0		0		0		0		0		0		0		0		1090						0	0						0	0						0	0						0	0
1091		0		0		0		0		0		0		0		0		1091						0	0						0	0						0	0						0	0
1092		0		0		0		0		0		0		0		0		1092						0	0						0	0						0	0						0	0
1093		0		0		0		0		0		0		0		0		1093						0	0						0	0						0	0						0	0
1094		0		0		0		0		0		0		0		0		1094						0	0						0	0						0	0						0	0
1095		0		0		0		0		0		0		0		0		1095						0	0						0	0						0	0						0	0
1096		0		0		0		0		0		0		0		0		1096						0	0						0	0						0	0						0	0
1097		0		0		0		0		0		0		0		0		1097						0	0						0	0						0	0						0	0
1098		0		0		0		0		0		0		0		0		1098						0	0						0	0						0	0						0	0
1099		0		0		0		0		0		0		0		0		1099						0	0						0	0						0	0						0	0
1100		0	1	1100		0		0		0		0		0		0		1100						0	0						0	0						0	0						0	0
1101		0		0		0		0		0		0		0		0		1101						0	0						0	0						0	0						0	0
1102		0		0		0		0		0		0		0		0		1102						0	0						0	0						0	0						0	0
1103		0		0		0		0		0		0		0		0		1103						0	0						0	0						0	0						0	0
1104		0		0		0		0		0		0		0		0		1104						0	0						0	0						0	0						0	0
1105		0		0		0		0		0		0		0		0		1105						0	0						0	0						0	0						0	0
1106		0		0		0		0		0		0		0		0		1106						0	0						0	0						0	0						0	0
1107		0		0		0		0		0		0		0		0		1107						0	0						0	0						0	0						0	0
1108		0		0		0		0		0		0		0		0		1108						0	0						0	0						0	0						0	0
1109		0		0		0		0		0		0		0		0		1109						0	0						0	0						0	0						0	0
1110		0		0		0		0		0		0		0		0		1110						0	0						0	0						0	0						0	0	161	136	144
1111		0		0		0		0		0		0		0		0		1111						0	0						0	0						0	0						0	0
1112		0		0		0		0		0		0		0		0		1112						0	0						0	0						0	0						0	0
1113		0		0		0		0		0		0		0		0		1113						0	0						0	0						0	0						0	0
1114		0		0		0		0		0		0		0		0		1114						0	0						0	0						0	0						0	0
1115		0		0		0		0		0		0		0		0		1115						0	0						0	0						0	0						0	0
1116		0		0		0		0		0		0		0		0		1116						0	0						0	0						0	0						0	0
1117		0		0		0		0		0		0		0		0		1117						0	0						0	0						0	0						0	0
1118		0		0		0		0		0		0		0		0		1118						0	0						0	0						0	0						0	0
1119		0		0		0		0		0		0		0		0		1119						0	0						0	0						0	0						0	0
1120	1	1120		0		0		0		0		0		0		0		1120						0	0						0	0						0	0						0	0
1121		0		0		0		0		0		0		0		0		1121						0	0						0	0						0	0						0	0
1122		0		0		0		0		0		0		0		0		1122						0	0						0	0						0	0						0	0
1123		0		0		0		0		0		0		0		0		1123						0	0						0	0						0	0						0	0
1124		0		0		0		0		0		0		0		0		1124						0	0						0	0						0	0						0	0
1125		0		0		0		0		0		0		0		0		1125						0	0						0	0						0	0						0	0
1126		0		0		0		0		0		0		0		0		1126						0	0						0	0						0	0						0	0
1127		0		0		0		0		0		0		0		0		1127						0	0						0	0						0	0						0	0
1128		0		0		0		0		0		0		0		0		1128						0	0						0	0						0	0						0	0
1129		0		0		0		0		0		0		0		0		1129						0	0						0	0						0	0						0	0
1130		0		0		0		0		0		0		0		0		1130						0	0	179	173	209	181	175	183.4	207242						0	0						0	0
1131		0		0		0		0		0		0		0		0		1131						0	0						0	0						0	0						0	0
1132		0		0		0		0		0		0		0		0		1132						0	0						0	0						0	0						0	0
1133		0		0		0		0		0		0		0		0		1133						0	0						0	0						0	0						0	0
1134		0		0		0		0		0		0		0		0		1134						0	0						0	0						0	0						0	0
1135		0		0		0		0		0		0		0		0		1135						0	0						0	0						0	0						0	0
1136		0		0		0		0		0		0		0		0		1136						0	0						0	0						0	0						0	0
1137		0		0		0		0		0		0		0		0		1137						0	0						0	0						0	0						0	0
1138		0		0		0		0		0		0		0		0		1138						0	0						0	0						0	0						0	0
1139		0		0		0		0		0		0		0		0		1139						0	0						0	0						0	0						0	0
1140		0		0		0		0	1	1140		0		0		0		1140						0	0						0	0						0	0						0	0
1141		0		0		0		0		0		0		0		0		1141						0	0						0	0						0	0						0	0
1142		0		0		0		0		0		0		0		0		1142						0	0						0	0						0	0						0	0
1143		0		0		0		0		0		0		0		0		1143						0	0						0	0						0	0						0	0
1144		0		0		0		0		0		0		0		0		1144						0	0						0	0						0	0						0	0
1145		0		0		0		0		0		0		0		0		1145						0	0						0	0						0	0						0	0
1146		0		0		0		0		0		0		0		0		1146						0	0						0	0						0	0						0	0
1147		0		0		0		0		0		0		0		0		1147						0	0						0	0						0	0						0	0
1148		0		0		0		0		0		0		0		0		1148						0	0						0	0						0	0						0	0
1149		0		0		0		0		0		0		0		0		1149						0	0						0	0						0	0						0	0
1150		0		0		0		0		0		0		0		0		1150	371	353	351	367	364	361.2	415380						0	0						0	0						0	0
1151		0		0		0		0		0		0		0		0		1151						0	0						0	0						0	0						0	0
1152		0		0		0		0		0		0		0		0		1152						0	0						0	0						0	0						0	0
1153		0		0		0		0		0		0		0		0		1153						0	0						0	0						0	0						0	0
1154		0		0		0		0		0		0		0		0		1154						0	0						0	0						0	0						0	0
1155		0		0		0		0		0		0		0		0		1155						0	0						0	0						0	0						0	0
1156		0		0		0		0		0		0		0		0		1156						0	0						0	0						0	0						0	0
1157		0		0		0		0		0		0		0		0		1157						0	0						0	0						0	0						0	0
1158		0		0		0		0		0		0		0		0		1158						0	0						0	0						0	0						0	0
1159		0		0		0		0		0		0		0		0		1159						0	0						0	0						0	0						0	0
1160	1	1160		0		0		0		0		0		0		0		1160						0	0						0	0						0	0						0	0
1161		0		0		0		0		0		0		0		0		1161						0	0						0	0						0	0						0	0
1162		0		0		0		0		0		0		0		0		1162						0	0						0	0						0	0						0	0
1163		0		0		0		0		0		0		0		0		1163						0	0						0	0						0	0						0	0
1164		0		0		0		0		0		0		0		0		1164						0	0						0	0						0	0						0	0
1165		0		0		0		0		0		0		0		0		1165						0	0						0	0						0	0						0	0
1166		0		0		0		0		0		0		0		0		1166						0	0						0	0						0	0						0	0
1167		0		0		0		0		0		0		0		0		1167						0	0						0	0						0	0						0	0
1168		0		0		0		0		0		0		0		0		1168						0	0						0	0						0	0						0	0
1169		0		0		0		0		0		0		0		0		1169						0	0						0	0						0	0						0	0
1170	1	1170	1	1170		0		0	1	1170		0		0		0		1170						0	0						0	0						0	0						0	0	173	183	177
1171		0		0		0		0		0		0		0		0		1171						0	0						0	0						0	0						0	0
1172		0		0		0		0		0		0		0		0		1172						0	0						0	0						0	0						0	0
1173		0		0		0		0		0		0		0		0		1173						0	0						0	0						0	0						0	0
1174		0		0		0		0		0		0		0		0		1174						0	0						0	0						0	0						0	0
1175		0		0		0		0		0		0		0		0		1175						0	0						0	0						0	0						0	0
1176		0		0		0		0		0		0		0		0		1176						0	0						0	0						0	0						0	0
1177		0		0		0		0		0		0		0		0		1177						0	0						0	0						0	0						0	0
1178		0		0		0		0		0		0		0		0		1178						0	0						0	0						0	0						0	0
1179		0		0		0		0		0		0		0		0		1179						0	0						0	0						0	0						0	0
1180		0		0		0		0		0		0	1	1180		0		1180						0	0						0	0						0	0						0	0
1181		0		0		0		0		0		0		0		0		1181						0	0						0	0						0	0						0	0
1182		0		0		0		0		0		0		0		0		1182						0	0						0	0						0	0						0	0
1183		0		0		0		0		0		0		0		0		1183						0	0						0	0						0	0						0	0
1184		0		0		0		0		0		0		0		0		1184						0	0						0	0						0	0						0	0
1185		0		0		0		0		0		0		0		0		1185						0	0						0	0						0	0						0	0
1186		0		0		0		0		0		0		0		0		1186						0	0						0	0						0	0						0	0
1187		0		0		0		0		0		0		0		0		1187						0	0						0	0						0	0						0	0
1188		0		0		0		0		0		0		0		0		1188						0	0						0	0						0	0						0	0
1189		0		0		0		0		0		0		0		0		1189						0	0						0	0						0	0						0	0
1190	2	2380	1	1190		0		0		0	1	1190		0		0		1190	392	369	416	399	357	386.6	460054						0	0						0	0						0	0
1191		0		0		0		0		0		0		0		0		1191						0	0						0	0						0	0						0	0
1192		0		0		0		0		0		0		0		0		1192						0	0						0	0						0	0						0	0
1193		0		0		0		0		0		0		0		0		1193						0	0						0	0						0	0						0	0
1194		0		0		0		0		0		0		0		0		1194						0	0						0	0						0	0						0	0
1195		0		0		0		0		0		0		0		0		1195						0	0						0	0						0	0						0	0
1196		0		0		0		0		0		0		0		0		1196						0	0						0	0						0	0						0	0
1197		0		0		0		0		0		0		0		0		1197						0	0						0	0						0	0						0	0
1198		0		0		0		0		0		0		0		0		1198						0	0						0	0						0	0						0	0
1199		0		0		0		0		0		0		0		0		1199						0	0						0	0						0	0						0	0
1200	2	2400		0	1	1200		0	1	1200		0		0		0		1200	387	386	453	441	387	410.8	492960	246	235	259	255	233	245.6	294720						0	0						0	0	208	193	202
1201		0		0		0		0		0		0		0		0		1201						0	0						0	0						0	0						0	0
1202		0		0		0		0		0		0		0		0		1202						0	0						0	0						0	0						0	0
1203		0		0		0		0		0		0		0		0		1203						0	0						0	0						0	0						0	0
1204		0		0		0		0		0		0		0		0		1204						0	0						0	0						0	0						0	0
1205		0		0		0		0		0		0		0		0		1205						0	0						0	0						0	0						0	0
1206		0		0		0		0		0		0		0		0		1206						0	0						0	0						0	0						0	0
1207		0		0		0		0		0		0		0		0		1207						0	0						0	0						0	0						0	0
1208		0		0		0		0		0		0		0		0		1208						0	0						0	0						0	0						0	0
1209		0		0		0		0		0		0		0		0		1209						0	0						0	0						0	0						0	0
1210	1	1210		0	2	2420		0	1	1210		0		0		0		1210						0	0						0	0						0	0						0	0
1211		0		0		0		0		0		0		0		0		1211						0	0						0	0						0	0						0	0
1212		0		0		0		0		0		0		0		0		1212						0	0						0	0						0	0						0	0
1213		0		0		0		0		0		0		0		0		1213						0	0						0	0						0	0						0	0
1214		0		0		0		0		0		0		0		0		1214						0	0						0	0						0	0						0	0
1215		0		0		0		0		0		0		0		0		1215						0	0						0	0						0	0						0	0
1216		0		0		0		0		0		0		0		0		1216						0	0						0	0						0	0						0	0
1217		0		0		0		0		0		0		0		0		1217						0	0						0	0						0	0						0	0
1218		0		0		0		0		0		0		0		0		1218						0	0						0	0						0	0						0	0
1219		0		0		0		0		0		0		0		0		1219						0	0						0	0						0	0						0	0
1220		0	1	1220		0		0	1	1220		0		0		0		1220	838	828	789	864	773	818.4	998448	265	306	273	263	253	272	331840						0	0						0	0
1221		0		0		0		0		0		0		0		0		1221						0	0						0	0						0	0						0	0
1222		0		0		0		0		0		0		0		0		1222						0	0						0	0						0	0						0	0
1223		0		0		0		0		0		0		0		0		1223						0	0						0	0						0	0						0	0
1224		0		0		0		0		0		0		0		0		1224						0	0						0	0						0	0						0	0
1225		0		0		0		0		0		0		0		0		1225						0	0						0	0						0	0						0	0
1226		0		0		0		0		0		0		0		0		1226						0	0						0	0						0	0						0	0
1227		0		0		0		0		0		0		0		0		1227						0	0						0	0						0	0						0	0
1228		0		0		0		0		0		0		0		0		1228						0	0						0	0						0	0						0	0
1229		0		0		0		0		0		0		0		0		1229						0	0						0	0						0	0						0	0
1230	3	3690		0		0		0	1	1230	1	1230		0		0		1230	844	835	873	851	740	828.6	1019178						0	0	332	271	284	264	290	288.2	354486						0	0	226	229	198
1231		0		0		0		0		0		0		0		0		1231						0	0						0	0						0	0						0	0
1232		0		0		0		0		0		0		0		0		1232						0	0						0	0						0	0						0	0
1233		0		0		0		0		0		0		0		0		1233						0	0						0	0						0	0						0	0
1234		0		0		0		0		0		0		0		0		1234						0	0						0	0						0	0						0	0
1235		0		0		0		0		0		0		0		0		1235						0	0						0	0						0	0						0	0
1236		0		0		0		0		0		0		0		0		1236						0	0						0	0						0	0						0	0
1237		0		0		0		0		0		0		0		0		1237						0	0						0	0						0	0						0	0
1238		0		0		0		0		0		0		0		0		1238						0	0						0	0						0	0						0	0
1239		0		0		0		0		0		0		0		0		1239						0	0						0	0						0	0						0	0
1240		0	1	1240		0		0		0		0		0		0		1240	458	381	451	407	413	422	523280						0	0	717	570	623	605	716	646.2	801288						0	0	216	217	250
1241		0		0		0		0		0		0		0		0		1241						0	0						0	0						0	0						0	0
1242		0		0		0		0		0		0		0		0		1242						0	0						0	0						0	0						0	0
1243		0		0		0		0		0		0		0		0		1243						0	0						0	0						0	0						0	0
1244		0		0		0		0		0		0		0		0		1244						0	0						0	0						0	0						0	0
1245		0		0		0		0		0		0		0		0		1245						0	0						0	0						0	0						0	0
1246		0		0		0		0		0		0		0		0		1246						0	0						0	0						0	0						0	0
1247		0		0		0		0		0		0		0		0		1247						0	0						0	0						0	0						0	0
1248		0		0		0		0		0		0		0		0		1248						0	0						0	0						0	0						0	0
1249		0		0		0		0		0		0		0		0		1249						0	0						0	0						0	0						0	0
1250		0		0	1	1250		0	1	1250	1	1250		0		0		1250						0	0	333	295	343	317	304	318.4	398000						0	0						0	0	221	223	233
1251		0		0		0		0		0		0		0		0		1251						0	0						0	0						0	0						0	0
1252		0		0		0		0		0		0		0		0		1252						0	0						0	0						0	0						0	0
1253		0		0		0		0		0		0		0		0		1253						0	0						0	0						0	0						0	0
1254		0		0		0		0		0		0		0		0		1254						0	0						0	0						0	0						0	0
1255		0		0		0		0		0		0		0		0		1255						0	0						0	0						0	0						0	0
1256		0		0		0		0		0		0		0		0		1256						0	0						0	0						0	0						0	0
1257		0		0		0		0		0		0		0		0		1257						0	0						0	0						0	0						0	0
1258		0		0		0		0		0		0		0		0		1258						0	0						0	0						0	0						0	0
1259		0		0		0		0		0		0		0		0		1259						0	0						0	0						0	0						0	0
1260		0	3	3780	2	2520		0		0		0		0		0		1260	1335	1337	1416	1347	1282	1343.4	1692684						0	0						0	0						0	0	234	228	257
1261		0		0		0		0		0		0		0		0		1261						0	0						0	0						0	0						0	0
1262		0		0		0		0		0		0		0		0		1262						0	0						0	0						0	0						0	0
1263		0		0		0		0		0		0		0		0		1263						0	0						0	0						0	0						0	0
1264		0		0		0		0		0		0		0		0		1264						0	0						0	0						0	0						0	0
1265		0		0		0		0		0		0		0		0		1265						0	0						0	0						0	0						0	0
1266		0		0		0		0		0		0		0		0		1266						0	0						0	0						0	0						0	0
1267		0		0		0		0		0		0		0		0		1267						0	0						0	0						0	0						0	0
1268		0		0		0		0		0		0		0		0		1268						0	0						0	0						0	0						0	0
1269		0		0		0		0		0		0		0		0		1269						0	0						0	0						0	0						0	0
1270	1	1270	1	1270		0		0		0		0		0		0		1270						0	0	295	344	352	353	353	339.4	431038						0	0						0	0
1271		0		0		0		0		0		0		0		0		1271						0	0						0	0						0	0						0	0
1272		0		0		0		0		0		0		0		0		1272						0	0						0	0						0	0						0	0
1273		0		0		0		0		0		0		0		0		1273						0	0						0	0						0	0						0	0
1274		0		0		0		0		0		0		0		0		1274						0	0						0	0						0	0						0	0
1275		0		0		0		0		0		0		0		0		1275						0	0						0	0						0	0						0	0
1276		0		0		0		0		0		0		0		0		1276						0	0						0	0						0	0						0	0
1277		0		0		0		0		0		0		0		0		1277						0	0						0	0						0	0						0	0
1278		0		0		0		0		0		0		0		0		1278						0	0						0	0						0	0						0	0
1279		0		0		0		0		0		0		0		0		1279						0	0						0	0						0	0						0	0
1280	1	1280		0	1	1280		0	1	1280	1	1280		0		0		1280						0	0						0	0	396	298	340	365	341	348	445440						0	0	313	312	327
1281		0		0		0		0		0		0		0		0		1281						0	0						0	0						0	0						0	0
1282		0		0		0		0		0		0		0		0		1282						0	0						0	0						0	0						0	0
1283		0		0		0		0		0		0		0		0		1283						0	0						0	0						0	0						0	0
1284		0		0		0		0		0		0		0		0		1284						0	0						0	0						0	0						0	0
1285		0		0		0		0		0		0		0		0		1285						0	0						0	0						0	0						0	0
1286		0		0		0		0		0		0		0		0		1286						0	0						0	0						0	0						0	0
1287		0		0		0		0		0		0		0		0		1287						0	0						0	0						0	0						0	0
1288		0		0		0		0		0		0		0		0		1288						0	0						0	0						0	0						0	0
1289		0		0		0		0		0		0		0		0		1289						0	0						0	0						0	0						0	0
1290	1	1290	1	1290		0		0	3	3870		0		0		0		1290						0	0	1049	1013	1096	1117	1048	1064.6	1.37333e+06	714	677	671	674	701	687.4	886746						0	0
1291		0		0		0		0		0		0		0		0		1291						0	0						0	0						0	0						0	0
1292		0		0		0		0		0		0		0		0		1292						0	0						0	0						0	0						0	0
1293		0		0		0		0		0		0		0		0		1293						0	0						0	0						0	0						0	0
1294		0		0		0		0		0		0		0		0		1294						0	0						0	0						0	0						0	0
1295		0		0		0		0		0		0		0		0		1295						0	0						0	0						0	0						0	0
1296		0		0		0		0		0		0		0		0		1296						0	0						0	0						0	0						0	0
1297		0		0		0		0		0		0		0		0		1297						0	0						0	0						0	0						0	0
1298		0		0		0		0		0		0		0		0		1298						0	0						0	0						0	0						0	0
1299		0		0		0		0		0		0		0		0		1299						0	0						0	0						0	0						0	0
1300	2	2600	1	1300	2	2600		0	2	2600	1	1300		0		0		1300	468	478	473	502	452	474.6	616980	352	385	377	392	360	373.2	485160						0	0						0	0
1301		0		0		0		0		0		0		0		0		1301						0	0						0	0						0	0						0	0
1302		0		0		0		0		0		0		0		0		1302						0	0						0	0						0	0						0	0
1303		0		0		0		0		0		0		0		0		1303						0	0						0	0						0	0						0	0
1304		0		0		0		0		0		0		0		0		1304						0	0						0	0						0	0						0	0
1305		0		0		0		0		0		0		0		0		1305						0	0						0	0						0	0						0	0
1306		0		0		0		0		0		0		0		0		1306						0	0						0	0						0	0						0	0
1307		0		0		0		0		0		0		0		0		1307						0	0						0	0						0	0						0	0
1308		0		0		0		0		0		0		0		0		1308						0	0						0	0						0	0						0	0
1309		0		0		0		0		0		0		0		0		1309						0	0						0	0						0	0						0	0
1310		0	3	3930	1	1310		0	1	1310		0		0		0		1310	524	493	493	491	499	500	655000						0	0	403	358	352	400	393	381.2	499372						0	0	242	250	246
1311		0		0		0		0		0		0		0		0		1311						0	0						0	0						0	0						0	0
1312		0		0		0		0		0		0		0		0		1312						0	0						0	0						0	0						0	0
1313		0		0		0		0		0		0		0		0		1313						0	0						0	0						0	0						0	0
1314		0		0		0		0		0		0		0		0		1314						0	0						0	0						0	0						0	0
1315		0		0		0		0		0		0		0		0		1315						0	0						0	0						0	0						0	0
1316		0		0		0		0		0		0		0		0		1316						0	0						0	0						0	0						0	0
1317		0		0		0		0		0		0		0		0		1317						0	0						0	0						0	0						0	0
1318		0		0		0		0		0		0		0		0		1318						0	0						0	0						0	0						0	0
1319		0		0		0		0		0		0		0		0		1319						0	0						0	0						0	0						0	0
1320	4	5280	3	3960		0		0	4	5280	1	1320		0		0		1320	559	540	512	516	492	523.8	691416	374	374	419	377	376	384	506880						0	0						0	0	765	852	815
1321		0		0		0		0		0		0		0		0		1321						0	0						0	0						0	0						0	0
1322		0		0		0		0		0		0		0		0		1322						0	0						0	0						0	0						0	0
1323		0		0		0		0		0		0		0		0		1323						0	0						0	0						0	0						0	0
1324		0		0		0		0		0		0		0		0		1324						0	0						0	0						0	0						0	0
1325		0		0		0		0		0		0		0		0		1325						0	0						0	0						0	0						0	0
1326		0		0		0		0		0		0		0		0		1326						0	0						0	0						0	0						0	0
1327		0		0		0		0		0		0		0		0		1327						0	0						0	0						0	0						0	0
1328		0		0		0		0		0		0		0		0		1328						0	0						0	0						0	0						0	0
1329		0		0		0		0		0		0		0		0		1329						0	0						0	0						0	0						0	0
1330	1	1330	1	1330	1	1330		0	3	3990		0		0		0		1330	1001	1061	1016	1036	1049	1032.6	1.37336e+06	361	390	397	387	423	391.6	520828	862	755	792	763	786	791.6	1052828						0	0	543	580	611
1331		0		0		0		0		0		0		0		0		1331						0	0						0	0						0	0						0	0
1332		0		0		0		0		0		0		0		0		1332						0	0						0	0						0	0						0	0
1333		0		0		0		0		0		0		0		0		1333						0	0						0	0						0	0						0	0
1334		0		0		0		0		0		0		0		0		1334						0	0						0	0						0	0						0	0
1335		0		0		0		0		0		0		0		0		1335						0	0						0	0						0	0						0	0
1336		0		0		0		0		0		0		0		0		1336						0	0						0	0						0	0						0	0
1337		0		0		0		0		0		0		0		0		1337						0	0						0	0						0	0						0	0
1338		0		0		0		0		0		0		0		0		1338						0	0						0	0						0	0						0	0
1339		0		0		0		0		0		0		0		0		1339						0	0						0	0						0	0						0	0
1340	5	6700	1	1340	3	4020		0	1	1340	4	5360		0		0		1340						0	0	1086	1193	1248	1171	1255	1190.6	1.5954e+06	472	399	385	407	430	418.6	560924						0	0	288	318	270
1341		0		0		0		0		0		0		0		0		1341						0	0						0	0						0	0						0	0
1342		0		0		0		0		0		0		0		0		1342						0	0						0	0						0	0						0	0
1343		0		0		0		0		0		0		0		0		1343						0	0						0	0						0	0						0	0
1344		0		0		0		0		0		0		0		0		1344						0	0						0	0						0	0						0	0
1345		0		0		0		0		0		0		0		0		1345						0	0						0	0						0	0						0	0
1346		0		0		0		0		0		0		0		0		1346						0	0						0	0						0	0						0	0
1347		0		0		0		0		0		0		0		0		1347						0	0						0	0						0	0						0	0
1348		0		0		0		0		0		0		0		0		1348						0	0						0	0						0	0						0	0
1349		0		0		0		0		0		0		0		0		1349						0	0						0	0						0	0						0	0
1350	2	2700	4	5400	1	1350		0		0		0		0		0		1350	2080	2101	2165	2177	2024	2109.4	2847690	1192	1246	1307	1223	1254	1244.4	1.67994e+06						0	0						0	0	1183	1152	1155
1351		0		0		0		0		0		0		0		0		1351						0	0						0	0						0	0						0	0
1352		0		0		0		0		0		0		0		0		1352						0	0						0	0						0	0						0	0
1353		0		0		0		0		0		0		0		0		1353						0	0						0	0						0	0						0	0
1354		0		0		0		0		0		0		0		0		1354						0	0						0	0						0	0						0	0
1355		0		0		0		0		0		0		0		0		1355						0	0						0	0						0	0						0	0
1356		0		0		0		0		0		0		0		0		1356						0	0						0	0						0	0						0	0
1357		0		0		0		0		0		0		0		0		1357						0	0						0	0						0	0						0	0
1358		0		0		0		0		0		0		0		0		1358						0	0						0	0						0	0						0	0
1359		0		0		0		0		0		0		0		0		1359						0	0						0	0						0	0						0	0
1360	3	4080	1	1360	1	1360		0	1	1360		0		0		0		1360	557	543	507	576	533	543.2	738752	434	390	476	438	432	434	590240	455	380	402	395	424	411.2	559232						0	0	803	903	850
1361		0		0		0		0		0		0		0		0		1361						0	0						0	0						0	0						0	0
1362		0		0		0		0		0		0		0		0		1362						0	0						0	0						0	0						0	0
1363		0		0		0		0		0		0		0		0		1363						0	0						0	0						0	0						0	0
1364		0		0		0		0		0		0		0		0		1364						0	0						0	0						0	0						0	0
1365		0		0		0		0		0		0		0		0		1365						0	0						0	0						0	0						0	0
1366		0		0		0		0		0		0		0		0		1366						0	0						0	0						0	0						0	0
1367		0		0		0		0		0		0		0		0		1367						0	0						0	0						0	0						0	0
1368		0		0		0		0		0		0		0		0		1368						0	0						0	0						0	0						0	0
1369		0		0		0		0		0		0		0		0		1369						0	0						0	0						0	0						0	0
1370		0	1	1370	1	1370		0	3	4110		0		0		0		1370	2767	2745	2731	2790	2726	2751.8	3.76997e+06	393	427	452	416	450	427.6	585812	1405	1240	1268	1272	1300	1297	1776890						0	0	304	316	257
1371		0		0		0		0		0		0		0		0		1371						0	0						0	0						0	0						0	0
1372		0		0		0		0		0		0		0		0		1372						0	0						0	0						0	0						0	0
1373		0		0		0		0		0		0		0		0		1373						0	0						0	0						0	0						0	0
1374		0		0		0		0		0		0		0		0		1374						0	0						0	0						0	0						0	0
1375		0		0		0		0		0		0		0		0		1375						0	0						0	0						0	0						0	0
1376		0		0		0		0		0		0		0		0		1376						0	0						0	0						0	0						0	0
1377		0		0		0		0		0		0		0		0		1377						0	0						0	0						0	0						0	0
1378		0		0		0		0		0		0		0		0		1378						0	0						0	0						0	0						0	0
1379		0		0		0		0		0		0		0		0		1379						0	0						0	0						0	0						0	0
1380	7	9660	5	6900	2	2760		0	2	2760	2	2760	2	2760		0		1380	1113	1123	1095	1106	1086	1104.6	1.52435e+06	1688	1713	1823	1696	1701	1724.2	2379396	457	444	421	444	467	446.6	616308						0	0
1381		0		0		0		0		0		0		0		0		1381						0	0						0	0						0	0						0	0
1382		0		0		0		0		0		0		0		0		1382						0	0						0	0						0	0						0	0
1383		0		0		0		0		0		0		0		0		1383						0	0						0	0						0	0						0	0
1384		0		0		0		0		0		0		0		0		1384						0	0						0	0						0	0						0	0
1385		0		0		0		0		0		0		0		0		1385						0	0						0	0						0	0						0	0
1386		0		0		0		0		0		0		0		0		1386						0	0						0	0						0	0						0	0
1387		0		0		0		0		0		0		0		0		1387						0	0						0	0						0	0						0	0
1388		0		0		0		0		0		0		0		0		1388						0	0						0	0						0	0						0	0
1389		0		0		0		0		0		0		0		0		1389						0	0						0	0						0	0						0	0
1390	3	4170	1	1390	2	2780		0	3	4170		0		0	1	1390		1390	1646	1661	1654	1679	1683	1664.6	2313794	413	461	438	410	445	433.4	602426	492	429	438	468	447	454.8	632172						0	0	283	337	304
1391		0		0		0		0		0		0		0		0		1391						0	0						0	0						0	0						0	0
1392		0		0		0		0		0		0		0		0		1392						0	0						0	0						0	0						0	0
1393		0		0		0		0		0		0		0		0		1393						0	0						0	0						0	0						0	0
1394		0		0		0		0		0		0		0		0		1394						0	0						0	0						0	0						0	0
1395		0		0		0		0		0		0		0		0		1395						0	0						0	0						0	0						0	0
1396		0		0		0		0		0		0		0		0		1396						0	0						0	0						0	0						0	0
1397		0		0		0		0		0		0		0		0		1397						0	0						0	0						0	0						0	0
1398		0		0		0		0		0		0		0		0		1398						0	0						0	0						0	0						0	0
1399		0		0		0		0		0		0		0		0		1399						0	0						0	0						0	0						0	0
1400	3	4200	1	1400		0		0	3	4200		0		0		0		1400						0	0	466	445	473	397	456	447.4	626360	458	461	434	459	459	454.2	635880						0	0	933	935	950
1401		0		0		0		0		0		0		0		0		1401						0	0						0	0						0	0						0	0
1402		0		0		0		0		0		0		0		0		1402						0	0						0	0						0	0						0	0
1403		0		0		0		0		0		0		0		0		1403						0	0						0	0						0	0						0	0
1404		0		0		0		0		0		0		0		0		1404						0	0						0	0						0	0						0	0
1405		0		0		0		0		0		0		0		0		1405						0	0						0	0						0	0						0	0
1406		0		0		0		0		0		0		0		0		1406						0	0						0	0						0	0						0	0
1407		0		0		0		0		0		0		0		0		1407						0	0						0	0						0	0						0	0
1408		0		0		0		0		0		0		0		0		1408						0	0						0	0						0	0						0	0
1409		0		0		0		0		0		0		0		0		1409						0	0						0	0						0	0						0	0
1410	4	5640	3	4230	3	4230		0	4	5640	2	2820		0		0		1410	3994	3956	4006	3904	3695	3911	5514510	2120	2214	2367	2125	2159	2197	3097770	943	863	890	903	852	890.2	1255182						0	0	620	669	604
1411		0		0		0		0		0		0		0		0		1411						0	0						0	0						0	0						0	0
1412		0		0		0		0		0		0		0		0		1412						0	0						0	0						0	0						0	0
1413		0		0		0		0		0		0		0		0		1413						0	0						0	0						0	0						0	0
1414		0		0		0		0		0		0		0		0		1414						0	0						0	0						0	0						0	0
1415		0		0		0		0		0		0		0		0		1415						0	0						0	0						0	0						0	0
1416		0		0		0		0		0		0		0		0		1416						0	0						0	0						0	0						0	0
1417		0		0		0		0		0		0		0		0		1417						0	0						0	0						0	0						0	0
1418		0		0		0		0		0		0		0		0		1418						0	0						0	0						0	0						0	0
1419		0		0		0		0		0		0		0		0		1419						0	0						0	0						0	0						0	0
1420	3	4260	1	1420	4	5680		0	4	5680		0		0		0		1420	1716	1712	1756	1715	1644	1708.6	2426212	428	416	506	439	486	455	646100	981	870	897	905	1015	933.6	1325712						0	0	923	969	940
1421		0		0		0		0		0		0		0		0		1421						0	0						0	0						0	0						0	0
1422		0		0		0		0		0		0		0		0		1422						0	0						0	0						0	0						0	0
1423		0		0		0		0		0		0		0		0		1423						0	0						0	0						0	0						0	0
1424		0		0		0		0		0		0		0		0		1424						0	0						0	0						0	0						0	0
1425		0		0		0		0		0		0		0		0		1425						0	0						0	0						0	0						0	0
1426		0		0		0		0		0		0		0		0		1426						0	0						0	0						0	0						0	0
1427		0		0		0		0		0		0		0		0		1427						0	0						0	0						0	0						0	0
1428		0		0		0		0		0		0		0		0		1428						0	0						0	0						0	0						0	0
1429		0		0		0		0		0		0		0		0		1429						0	0						0	0						0	0						0	0
1430	3	4290	2	2860	1	1430		0	2	2860	3	4290		0		0		1430	1710	1733	1747	1726	1714	1726	2468180	453	431	514	445	464	461.4	659802						0	0						0	0	893	957	950
1431		0		0		0		0		0		0		0		0		1431						0	0						0	0						0	0						0	0
1432		0		0		0		0		0		0		0		0		1432						0	0						0	0						0	0						0	0
1433		0		0		0		0		0		0		0		0		1433						0	0						0	0						0	0						0	0
1434		0		0		0		0		0		0		0		0		1434						0	0						0	0						0	0						0	0
1435		0		0		0		0		0		0		0		0		1435						0	0						0	0						0	0						0	0
1436		0		0		0		0		0		0		0		0		1436						0	0						0	0						0	0						0	0
1437		0		0		0		0		0		0		0		0		1437						0	0						0	0						0	0						0	0
1438		0		0		0		0		0		0		0		0		1438						0	0						0	0						0	0						0	0
1439		0		0		0		0		0		0		0		0		1439						0	0						0	0						0	0						0	0
1440	5	7200	2	2880	1	1440		0	6	8640	1	1440		0		0		1440	2298	2360	2362	2428	2279	2345.4	3377376	1342	1453	1489	1324	1404	1402.4	2.01946e+06	1471	1309	1377	1381	1436	1394.8	2008512						0	0	1273	1311	1337
1441		0		0		0		0		0		0		0		0		1441						0	0						0	0						0	0						0	0
1442		0		0		0		0		0		0		0		0		1442						0	0						0	0						0	0						0	0
1443		0		0		0		0		0		0		0		0		1443						0	0						0	0						0	0						0	0
1444		0		0		0		0		0		0		0		0		1444						0	0						0	0						0	0						0	0
1445		0		0		0		0		0		0		0		0		1445						0	0						0	0						0	0						0	0
1446		0		0		0		0		0		0		0		0		1446						0	0						0	0						0	0						0	0
1447		0		0		0		0		0		0		0		0		1447						0	0						0	0						0	0						0	0
1448		0		0		0		0		0		0		0		0		1448						0	0						0	0						0	0						0	0
1449		0		0		0		0		0		0		0		0		1449						0	0						0	0						0	0						0	0
1450	2	2900	1	1450	2	2900		0	2	2900	1	1450		0		0		1450	1794	1745	1779	1840	1697	1771	2567950	462	469	499	398	483	462.2	670190	2004	1760	1843	1838	1952	1879.4	2725130	10	13	9	13	13	11.6	16820	1361	1326	1326
1451		0		0		0		0		0		0		0		0		1451						0	0						0	0						0	0						0	0
1452		0		0		0		0		0		0		0		0		1452						0	0						0	0						0	0						0	0
1453		0		0		0		0		0		0		0		0		1453						0	0						0	0						0	0						0	0
1454		0		0		0		0		0		0		0		0		1454						0	0						0	0						0	0						0	0
1455		0		0		0		0		0		0		0		0		1455						0	0						0	0						0	0						0	0
1456		0		0		0		0		0		0		0		0		1456						0	0						0	0						0	0						0	0
1457		0		0		0		0		0		0		0		0		1457						0	0						0	0						0	0						0	0
1458		0		0		0		0		0		0		0		0		1458						0	0						0	0						0	0						0	0
1459		0		0		0		0		0		0		0		0		1459						0	0						0	0						0	0						0	0
1460	4	5840		0	2	2920		0	2	2920	1	1460		0		0		1460	1804	1764	1800	1779	1744	1778.2	2596172	959	971	999	929	947	961	1403060	502	456	469	519	487	486.6	710436						0	0	695	677	664
1461		0		0		0		0		0		0		0		0		1461						0	0						0	0						0	0						0	0
1462		0		0		0		0		0		0		0		0		1462						0	0						0	0						0	0						0	0
1463		0		0		0		0		0		0		0		0		1463						0	0						0	0						0	0						0	0
1464		0		0		0		0		0		0		0		0		1464						0	0						0	0						0	0						0	0
1465		0		0		0		0		0		0		0		0		1465						0	0						0	0						0	0						0	0
1466		0		0		0		0		0		0		0		0		1466						0	0						0	0						0	0						0	0
1467		0		0		0		0		0		0		0		0		1467						0	0						0	0						0	0						0	0
1468		0		0		0		0		0		0		0		0		1468						0	0						0	0						0	0						0	0
1469		0		0		0		0		0		0		0		0		1469						0	0						0	0						0	0						0	0
1470	4	5880	2	2940	2	2940		0	2	2940	2	2940		0		0		1470	2869	2888	2941	2877	2925	2900	4263000	898	1015	975	985	973	969.2	1424724	522	490	508	466	483	493.8	725886						0	0	2051	1984	2048
1471		0		0		0		0		0		0		0		0		1471						0	0						0	0						0	0						0	0
1472		0		0		0		0		0		0		0		0		1472						0	0						0	0						0	0						0	0
1473		0		0		0		0		0		0		0		0		1473						0	0						0	0						0	0						0	0
1474		0		0		0		0		0		0		0		0		1474						0	0						0	0						0	0						0	0
1475		0		0		0		0		0		0		0		0		1475						0	0						0	0						0	0						0	0
1476		0		0		0		0		0		0		0		0		1476						0	0						0	0						0	0						0	0
1477		0		0		0		0		0		0		0		0		1477						0	0						0	0						0	0						0	0
1478		0		0		0		0		0		0		0		0		1478						0	0						0	0						0	0						0	0
1479		0		0		0		0		0		0		0		0		1479						0	0						0	0						0	0						0	0
1480	5	7400	3	4440		0		0	1	1480	1	1480		0		0		1480	1156	1177	1165	1158	1061	1143.4	1.69223e+06	470	510	562	503	510	511	756280	1086	994	949	1003	1019	1010.2	1495096						0	0	684	635	711
1481		0		0		0		0		0		0		0		0		1481						0	0						0	0						0	0						0	0
1482		0		0		0		0		0		0		0		0		1482						0	0						0	0						0	0						0	0
1483		0		0		0		0		0		0		0		0		1483						0	0						0	0						0	0						0	0
1484		0		0		0		0		0		0		0		0		1484						0	0						0	0						0	0						0	0
1485		0		0		0		0		0		0		0		0		1485						0	0						0	0						0	0						0	0
1486		0		0		0		0		0		0		0		0		1486						0	0						0	0						0	0						0	0
1487		0		0		0		0		0		0		0		0		1487						0	0						0	0						0	0						0	0
1488		0		0		0		0		0		0		0		0		1488						0	0						0	0						0	0						0	0
1489		0		0		0		0		0		0		0		0		1489						0	0						0	0						0	0						0	0
1490	2	2980	3	4470		0		0	1	1490	4	5960	2	2980	1	1490		1490	2434	2394	2348	2426	2369	2394.2	3.56736e+06						0	0	1002	932	1011	1043	1072	1012	1507880						0	0	630	658	687
1491		0		0		0		0		0		0		0		0		1491						0	0						0	0						0	0						0	0
1492		0		0		0		0		0		0		0		0		1492						0	0						0	0						0	0						0	0
1493		0		0		0		0		0		0		0		0		1493						0	0						0	0						0	0						0	0
1494		0		0		0		0		0		0		0		0		1494						0	0						0	0						0	0						0	0
1495		0		0		0		0		0		0		0		0		1495						0	0						0	0						0	0						0	0
1496		0		0		0		0		0		0		0		0		1496						0	0						0	0						0	0						0	0
1497		0		0		0		0		0		0		0		0		1497						0	0						0	0						0	0						0	0
1498		0		0		0		0		0		0		0		0		1498						0	0						0	0						0	0						0	0
1499		0		0		0		0		0		0		0		0		1499						0	0						0	0						0	0						0	0
1500	3	4500		0		0		0	5	7500	2	3000	1	1500		0		1500	2354	2394	2371	2475	2321	2383	3574500	996	1017	1040	960	976	997.8	1496700	1115	995	1007	1033	1042	1038.4	1.5576e+06						0	0	698	684	704
1501		0		0		0		0		0		0		0		0		1501						0	0						0	0						0	0						0	0
1502		0		0		0		0		0		0		0		0		1502						0	0						0	0						0	0						0	0
1503		0		0		0		0		0		0		0		0		1503						0	0						0	0						0	0						0	0
1504		0		0		0		0		0		0		0		0		1504						0	0						0	0						0	0						0	0
1505		0		0		0		0		0		0		0		0		1505						0	0						0	0						0	0						0	0
1506		0		0		0		0		0		0		0		0		1506						0	0						0	0						0	0						0	0
1507		0		0		0		0		0		0		0		0		1507						0	0						0	0						0	0						0	0
1508		0		0		0		0		0		0		0		0		1508						0	0						0	0						0	0						0	0
1509		0		0		0		0		0		0		0		0		1509						0	0						0	0						0	0						0	0
1510	2	3020	5	7550	1	1510		0	3	4530	3	4530		0		0		1510	2966	3049	3108	3031	2888	3008.4	4542684	1413	1500	1627	1432	1542	1502.8	2269228						0	0						0	0	329	338	360
1511		0		0		0		0		0		0		0		0		1511						0	0						0	0						0	0						0	0
1512		0		0		0		0		0		0		0		0		1512						0	0						0	0						0	0						0	0
1513		0		0		0		0		0		0		0		0		1513						0	0						0	0						0	0						0	0
1514		0		0		0		0		0		0		0		0		1514						0	0						0	0						0	0						0	0
1515		0		0		0		0		0		0		0		0		1515						0	0						0	0						0	0						0	0
1516		0		0		0		0		0		0		0		0		1516						0	0						0	0						0	0						0	0
1517		0		0		0		0		0		0		0		0		1517						0	0						0	0						0	0						0	0
1518		0		0		0		0		0		0		0		0		1518						0	0						0	0						0	0						0	0
1519		0		0		0		0		0		0		0		0		1519						0	0						0	0						0	0						0	0
1520	5	7600	4	6080	1	1520		0	2	3040	1	1520	1	1520		0		1520	1240	1211	1240	1270	1147	1221.6	1.85683e+06	1455	1532	1597	1478	1475	1507.4	2291248						0	0						0	0	362	332	340
1521		0		0		0		0		0		0		0		0		1521						0	0						0	0						0	0						0	0
1522		0		0		0		0		0		0		0		0		1522						0	0						0	0						0	0						0	0
1523		0		0		0		0		0		0		0		0		1523						0	0						0	0						0	0						0	0
1524		0		0		0		0		0		0		0		0		1524						0	0						0	0						0	0						0	0
1525		0		0		0		0		0		0		0		0		1525						0	0						0	0						0	0						0	0
1526		0		0		0		0		0		0		0		0		1526						0	0						0	0						0	0						0	0
1527		0		0		0		0		0		0		0		0		1527						0	0						0	0						0	0						0	0
1528		0		0		0		0		0		0		0		0		1528						0	0						0	0						0	0						0	0
1529		0		0		0		0		0		0		0		0		1529						0	0						0	0						0	0						0	0
1530	2	3060	3	4590	2	3060		0	7	10710	4	6120	1	1530		0		1530	1849	1823	1765	1884	1760	1816.2	2778786						0	0						0	0						0	0	1664	1842	1789
1531		0		0		0		0		0		0		0		0		1531						0	0						0	0						0	0						0	0
1532		0		0		0		0		0		0		0		0		1532						0	0						0	0						0	0						0	0
1533		0		0		0		0		0		0		0		0		1533						0	0						0	0						0	0						0	0
1534		0		0		0		0		0		0		0		0		1534						0	0						0	0						0	0						0	0
1535		0		0		0		0		0		0		0		0		1535						0	0						0	0						0	0						0	0
1536		0		0		0		0		0		0		0		0		1536						0	0						0	0						0	0						0	0
1537		0		0		0		0		0		0		0		0		1537						0	0						0	0						0	0						0	0
1538		0		0		0		0		0		0		0		0		1538						0	0						0	0						0	0						0	0
1539		0		0		0		0		0		0		0		0		1539						0	0						0	0						0	0						0	0
1540	3	4620	4	6160	2	3080		0	2	3080	2	3080	1	1540		0		1540	1197	1189	1213	1239	1231	1213.8	1869252	2448	2547	2637	2560	2602	2558.8	3.94055e+06	519	504	445	491	525	496.8	765072						0	0	1058	1078	1008
1541		0		0		0		0		0		0		0		0		1541						0	0						0	0						0	0						0	0
1542		0		0		0		0		0		0		0		0		1542						0	0						0	0						0	0						0	0
1543		0		0		0		0		0		0		0		0		1543						0	0						0	0						0	0						0	0
1544		0		0		0		0		0		0		0		0		1544						0	0						0	0						0	0						0	0
1545		0		0		0		0		0		0		0		0		1545						0	0						0	0						0	0						0	0
1546		0		0		0		0		0		0		0		0		1546						0	0						0	0						0	0						0	0
1547		0		0		0		0		0		0		0		0		1547						0	0						0	0						0	0						0	0
1548		0		0		0		0		0		0		0		0		1548						0	0						0	0						0	0						0	0
1549		0		0		0		0		0		0		0		0		1549						0	0						0	0						0	0						0	0
1550	7	10850	7	10850		0		0	3	4650	2	3100	1	1550		0		1550	2981	3088	3143	3222	2978	3082.4	4777720	2012	2003	2062	1996	2019	2018.4	3128520	572	489	530	507	537	527	816850						0	0	697	679	714
1551		0		0		0		0		0		0		0		0		1551						0	0						0	0						0	0						0	0
1552		0		0		0		0		0		0		0		0		1552						0	0						0	0						0	0						0	0
1553		0		0		0		0		0		0		0		0		1553						0	0						0	0						0	0						0	0
1554		0		0		0		0		0		0		0		0		1554						0	0						0	0						0	0						0	0
1555		0		0		0		0		0		0		0		0		1555						0	0						0	0						0	0						0	0
1556		0		0		0		0		0		0		0		0		1556						0	0						0	0						0	0						0	0
1557		0		0		0		0		0		0		0		0		1557						0	0						0	0						0	0						0	0
1558		0		0		0		0		0		0		0		0		1558						0	0						0	0						0	0						0	0
1559		0		0		0		0		0		0		0		0		1559						0	0						0	0						0	0						0	0
1560	5	7800	3	4680		0		0	4	6240	7	10920	2	3120		0		1560	1272	1228	1257	1197	1209	1232.6	1.92286e+06	1492	1594	1601	1528	1623	1567.6	2445456	1069	1054	1100	1077	1047	1069.4	1.66826e+06						0	0	2351	2394	2471
1561		0		0		0		0		0		0		0		0		1561						0	0						0	0						0	0						0	0
1562		0		0		0		0		0		0		0		0		1562						0	0						0	0						0	0						0	0
1563		0		0		0		0		0		0		0		0		1563						0	0						0	0						0	0						0	0
1564		0		0		0		0		0		0		0		0		1564						0	0						0	0						0	0						0	0
1565		0		0		0		0		0		0		0		0		1565						0	0						0	0						0	0						0	0
1566		0		0		0		0		0		0		0		0		1566						0	0						0	0						0	0						0	0
1567		0		0		0		0		0		0		0		0		1567						0	0						0	0						0	0						0	0
1568		0		0		0		0		0		0		0		0		1568						0	0						0	0						0	0						0	0
1569		0		0		0		0		0		0		0		0		1569						0	0						0	0						0	0						0	0
1570	3	4710	2	3140	2	3140		0	4	6280	8	12560	1	1570	1	1570		1570	1801	1809	1831	1895	1814	1830	2873100	1972	2056	2161	2023	2042	2050.8	3.21976e+06	1227	1065	1065	1070	1078	1101	1728570						0	0	663	685	724
1571		0		0		0		0		0		0		0		0		1571						0	0						0	0						0	0						0	0
1572		0		0		0		0		0		0		0		0		1572						0	0						0	0						0	0						0	0
1573		0		0		0		0		0		0		0		0		1573						0	0						0	0						0	0						0	0
1574		0		0		0		0		0		0		0		0		1574						0	0						0	0						0	0						0	0
1575		0		0		0		0		0		0		0		0		1575						0	0						0	0						0	0						0	0
1576		0		0		0		0		0		0		0		0		1576						0	0						0	0						0	0						0	0
1577		0		0		0		0		0		0		0		0		1577						0	0						0	0						0	0						0	0
1578		0		0		0		0		0		0		0		0		1578						0	0						0	0						0	0						0	0
1579		0		0		0		0		0		0		0		0		1579						0	0						0	0						0	0						0	0
1580	5	7900	5	7900	1	1580		0	4	6320	4	6320	1	1580		0		1580	4297	4310	4553	4398	3971	4305.8	6803164	3398	3547	3710	3553	3504	3542.4	5596992						0	0						0	0	1024	1046	1045
1581		0		0		0		0		0		0		0		0		1581						0	0						0	0						0	0						0	0
1582		0		0		0		0		0		0		0		0		1582						0	0						0	0						0	0						0	0
1583		0		0		0		0		0		0		0		0		1583						0	0						0	0						0	0						0	0
1584		0		0		0		0		0		0		0		0		1584						0	0						0	0						0	0						0	0
1585		0		0		0		0		0		0		0		0		1585						0	0						0	0						0	0						0	0
1586		0		0		0		0		0		0		0		0		1586						0	0						0	0						0	0						0	0
1587		0		0		0		0		0		0		0		0		1587						0	0						0	0						0	0						0	0
1588		0		0		0		0		0		0		0		0		1588						0	0						0	0						0	0						0	0
1589		0		0		0		0		0		0		0		0		1589						0	0						0	0						0	0						0	0
1590	4	6360	6	9540	3	4770		0	4	6360	1	1590	1	1590		0		1590	3125	2985	3180	3114	2971	3075	4889250	1495	1550	1649	1499	1580	1554.6	2471814						0	0						0	0	1389	1360	1350
1591		0		0		0		0		0		0		0		0		1591						0	0						0	0						0	0						0	0
1592		0		0		0		0		0		0		0		0		1592						0	0						0	0						0	0						0	0
1593		0		0		0		0		0		0		0		0		1593						0	0						0	0						0	0						0	0
1594		0		0		0		0		0		0		0		0		1594						0	0						0	0						0	0						0	0
1595		0		0		0		0		0		0		0		0		1595						0	0						0	0						0	0						0	0
1596		0		0		0		0		0		0		0		0		1596						0	0						0	0						0	0						0	0
1597		0		0		0		0		0		0		0		0		1597						0	0						0	0						0	0						0	0
1598		0		0		0		0		0		0		0		0		1598						0	0						0	0						0	0						0	0
1599		0		0		0		0		0		0		0		0		1599						0	0						0	0						0	0						0	0
1600	5	8000	4	6400		0		0	4	6400	3	4800		0	1	1600		1600	1846	1845	1924	1827	1769	1842.2	2947520	949	1040	1079	964	1034	1013.2	1621120	1112	1093	1090	1042	1125	1092.4	1.74784e+06						0	0	1476	1554	1503
1601		0		0		0		0		0		0		0		0		1601						0	0						0	0						0	0						0	0
1602		0		0		0		0		0		0		0		0		1602						0	0						0	0						0	0						0	0
1603		0		0		0		0		0		0		0		0		1603						0	0						0	0						0	0						0	0
1604		0		0		0		0		0		0		0		0		1604						0	0						0	0						0	0						0	0
1605		0		0		0		0		0		0		0		0		1605						0	0						0	0						0	0						0	0
1606		0		0		0		0		0		0		0		0		1606						0	0						0	0						0	0						0	0
1607		0		0		0		0		0		0		0		0		1607						0	0						0	0						0	0						0	0
1608		0		0		0		0		0		0		0		0		1608						0	0						0	0						0	0						0	0
1609		0		0		0		0		0		0		0		0		1609						0	0						0	0						0	0						0	0
1610	6	9660	6	9660		0		0	5	8050	3	4830	2	3220		0		1610	3084	3256	3248	3185	3063	3167.2	5099192	2532	2562	2834	2551	2671	2630	4234300	591	498	521	564	536	542	872620						0	0	1473	1412	1445
1611		0		0		0		0		0		0		0		0		1611						0	0						0	0						0	0						0	0
1612		0		0		0		0		0		0		0		0		1612						0	0						0	0						0	0						0	0
1613		0		0		0		0		0		0		0		0		1613						0	0						0	0						0	0						0	0
1614		0		0		0		0		0		0		0		0		1614						0	0						0	0						0	0						0	0
1615		0		0		0		0		0		0		0		0		1615						0	0						0	0						0	0						0	0
1616		0		0		0		0		0		0		0		0		1616						0	0						0	0						0	0						0	0
1617		0		0		0		0		0		0		0		0		1617						0	0						0	0						0	0						0	0
1618		0		0		0		0		0		0		0		0		1618						0	0						0	0						0	0						0	0
1619		0		0		0		0		0		0		0		0		1619						0	0						0	0						0	0						0	0
1620	4	6480	4	6480	1	1620		0	1	1620	1	1620		0		0		1620	2499	2542	2607	2586	2432	2533.2	4.10378e+06	2936	3106	3175	3008	3162	3077.4	4985388	1727	1623	1607	1599	1731	1657.4	2684988						0	0	1391	1524	1434
1621		0		0		0		0		0		0		0		0		1621						0	0						0	0						0	0						0	0
1622		0		0		0		0		0		0		0		0		1622						0	0						0	0						0	0						0	0
1623		0		0		0		0		0		0		0		0		1623						0	0						0	0						0	0						0	0
1624		0		0		0		0		0		0		0		0		1624						0	0						0	0						0	0						0	0
1625		0		0		0		0		0		0		0		0		1625						0	0						0	0						0	0						0	0
1626		0		0		0		0		0		0		0		0		1626						0	0						0	0						0	0						0	0
1627		0		0		0		0		0		0		0		0		1627						0	0						0	0						0	0						0	0
1628		0		0		0		0		0		0		0		0		1628						0	0						0	0						0	0						0	0
1629		0		0		0		0		0		0		0		0		1629						0	0						0	0						0	0						0	0
1630	4	6520	7	11410	2	3260		0	6	9780	3	4890	3	4890		0		1630	3237	3156	3199	3191	3045	3165.6	5159928	2011	2104	2154	2018	2040	2065.4	3366602						0	0						0	0	1377	1394	1452
1631		0		0		0		0		0		0		0		0		1631						0	0						0	0						0	0						0	0
1632		0		0		0		0		0		0		0		0		1632						0	0						0	0						0	0						0	0
1633		0		0		0		0		0		0		0		0		1633						0	0						0	0						0	0						0	0
1634		0		0		0		0		0		0		0		0		1634						0	0						0	0						0	0						0	0
1635		0		0		0		0		0		0		0		0		1635						0	0						0	0						0	0						0	0
1636		0		0		0		0		0		0		0		0		1636						0	0						0	0						0	0						0	0
1637		0		0		0		0		0		0		0		0		1637						0	0						0	0						0	0						0	0
1638		0		0		0		0		0		0		0		0		1638						0	0						0	0						0	0						0	0
1639		0		0		0		0		0		0		0		0		1639						0	0						0	0						0	0						0	0
1640	5	8200	7	11480	3	4920		0	6	9840	3	4920	3	4920		0		1640	3701	3831	3736	3769	3657	3738.8	6131632	3009	3103	3214	3072	3176	3114.8	5108272						0	0						0	0	1754	1807	1800
1641		0		0		0		0		0		0		0		0		1641						0	0						0	0						0	0						0	0
1642		0		0		0		0		0		0		0		0		1642						0	0						0	0						0	0						0	0
1643		0		0		0		0		0		0		0		0		1643						0	0						0	0						0	0						0	0
1644		0		0		0		0		0		0		0		0		1644						0	0						0	0						0	0						0	0
1645		0		0		0		0		0		0		0		0		1645						0	0						0	0						0	0						0	0
1646		0		0		0		0		0		0		0		0		1646						0	0						0	0						0	0						0	0
1647		0		0		0		0		0		0		0		0		1647						0	0						0	0						0	0						0	0
1648		0		0		0		0		0		0		0		0		1648						0	0						0	0						0	0						0	0
1649		0		0		0		0		0		0		0		0		1649						0	0						0	0						0	0						0	0
1650	5	8250	9	14850	1	1650		0	4	6600	2	3300	1	1650		0		1650	2538	2561	2508	2539	2440	2517.2	4.15338e+06	1930	2067	2084	2082	2089	2050.4	3383160	632	564	557	562	607	584.4	964260						0	0	367	388	373
1651		0		0		0		0		0		0		0		0		1651						0	0						0	0						0	0						0	0
1652		0		0		0		0		0		0		0		0		1652						0	0						0	0						0	0						0	0
1653		0		0		0		0		0		0		0		0		1653						0	0						0	0						0	0						0	0
1654		0		0		0		0		0		0		0		0		1654						0	0						0	0						0	0						0	0
1655		0		0		0		0		0		0		0		0		1655						0	0						0	0						0	0						0	0
1656		0		0		0		0		0		0		0		0		1656						0	0						0	0						0	0						0	0
1657		0		0		0		0		0		0		0		0		1657						0	0						0	0						0	0						0	0
1658		0		0		0		0		0		0		0		0		1658						0	0						0	0						0	0						0	0
1659		0		0		0		0		0		0		0		0		1659						0	0						0	0						0	0						0	0
1660	6	9960	7	11620	2	3320		0	8	13280	2	3320	1	1660		0		1660	2495	2635	2578	2675	2500	2576.6	4277156	3429	3580	3839	3604	3709	3632.2	6029452	1273	1124	1123	1163	1177	1172	1945520						0	0	2074	2146	2245
1661		0		0		0		0		0		0		0		0		1661						0	0						0	0						0	0						0	0
1662		0		0		0		0		0		0		0		0		1662						0	0						0	0						0	0						0	0
1663		0		0		0		0		0		0		0		0		1663						0	0						0	0						0	0						0	0
1664		0		0		0		0		0		0		0		0		1664						0	0						0	0						0	0						0	0
1665		0		0		0		0		0		0		0		0		1665						0	0						0	0						0	0						0	0
1666		0		0		0		0		0		0		0		0		1666						0	0						0	0						0	0						0	0
1667		0		0		0		0		0		0		0		0		1667						0	0						0	0						0	0						0	0
1668		0		0		0		0		0		0		0		0		1668						0	0						0	0						0	0						0	0
1669		0		0		0		0		0		0		0		0		1669						0	0						0	0						0	0						0	0
1670	6	10020	5	8350	2	3340		0	7	11690	2	3340	1	1670		0		1670	3063	3163	3286	3224	3148	3176.8	5305256	3481	3514	3900	3515	3683	3618.6	6043062	1883	1652	1652	1739	1786	1742.4	2909808						0	0	2107	2169	2147
1671		0		0		0		0		0		0		0		0		1671						0	0						0	0						0	0						0	0
1672		0		0		0		0		0		0		0		0		1672						0	0						0	0						0	0						0	0
1673		0		0		0		0		0		0		0		0		1673						0	0						0	0						0	0						0	0
1674		0		0		0		0		0		0		0		0		1674						0	0						0	0						0	0						0	0
1675		0		0		0		0		0		0		0		0		1675						0	0						0	0						0	0						0	0
1676		0		0		0		0		0		0		0		0		1676						0	0						0	0						0	0						0	0
1677		0		0		0		0		0		0		0		0		1677						0	0						0	0						0	0						0	0
1678		0		0		0		0		0		0		0		0		1678						0	0						0	0						0	0						0	0
1679		0		0		0		0		0		0		0		0		1679						0	0						0	0						0	0						0	0
1680	3	5040	5	8400		0		0	4	6720	1	1680	2	3360		0		1680	3101	3226	3136	3280	3081	3164.8	5316864	4568	4589	4828	4689	4615	4657.8	7825104	636	552	568	561	566	576.6	968688						0	0	1382	1465	1514
1681		0		0		0		0		0		0		0		0		1681						0	0						0	0						0	0						0	0
1682		0		0		0		0		0		0		0		0		1682						0	0						0	0						0	0						0	0
1683		0		0		0		0		0		0		0		0		1683						0	0						0	0						0	0						0	0
1684		0		0		0		0		0		0		0		0		1684						0	0						0	0						0	0						0	0
1685		0		0		0		0		0		0		0		0		1685						0	0						0	0						0	0						0	0
1686		0		0		0		0		0		0		0		0		1686						0	0						0	0						0	0						0	0
1687		0		0		0		0		0		0		0		0		1687						0	0						0	0						0	0						0	0
1688		0		0		0		0		0		0		0		0		1688						0	0						0	0						0	0						0	0
1689		0		0		0		0		0		0		0		0		1689						0	0						0	0						0	0						0	0
1690	2	3380	5	8450	2	3380		0	9	15210	3	5070	3	5070		0		1690	3782	3754	3802	3793	3541	3734.4	6311136	3436	3583	3810	3546	3757	3626.4	6128616	1280	1098	1144	1091	1151	1152.8	1948232						0	0	3048	3066	3104
1691		0		0		0		0		0		0		0		0		1691						0	0						0	0						0	0						0	0
1692		0		0		0		0		0		0		0		0		1692						0	0						0	0						0	0						0	0
1693		0		0		0		0		0		0		0		0		1693						0	0						0	0						0	0						0	0
1694		0		0		0		0		0		0		0		0		1694						0	0						0	0						0	0						0	0
1695		0		0		0		0		0		0		0		0		1695						0	0						0	0						0	0						0	0
1696		0		0		0		0		0		0		0		0		1696						0	0						0	0						0	0						0	0
1697		0		0		0		0		0		0		0		0		1697						0	0						0	0						0	0						0	0
1698		0		0		0		0		0		0		0		0		1698						0	0						0	0						0	0						0	0
1699		0		0		0		0		0		0		0		0		1699						0	0						0	0						0	0						0	0
1700	3	5100	9	15300	4	6800		0	4	6800	2	3400		0		0		1700	3710	3787	3801	3855	3647	3760	6392000	2405	2635	2639	2522	2604	2561	4353700	1200	1117	1132	1170	1133	1150.4	1.95568e+06						0	0	2460	2604	2673
1701		0		0		0		0		0		0		0		0		1701						0	0						0	0						0	0						0	0
1702		0		0		0		0		0		0		0		0		1702						0	0						0	0						0	0						0	0
1703		0		0		0		0		0		0		0		0		1703						0	0						0	0						0	0						0	0
1704		0		0		0		0		0		0		0		0		1704						0	0						0	0						0	0						0	0
1705		0		0		0		0		0		0		0		0		1705						0	0						0	0						0	0						0	0
1706		0		0		0		0		0		0		0		0		1706						0	0						0	0						0	0						0	0
1707		0		0		0		0		0		0		0		0		1707						0	0						0	0						0	0						0	0
1708		0		0		0		0		0		0		0		0		1708						0	0						0	0						0	0						0	0
1709		0		0		0		0		0		0		0		0		1709						0	0						0	0						0	0						0	0
1710	3	5130	5	8550	2	3420		0	5	8550	1	1710	2	3420		0		1710	1883	1879	1936	1895	1841	1886.8	3226428	2483	2680	2674	2572	2617	2605.2	4454892						0	0						0	0	1301	1295	1277
1711		0		0		0		0		0		0		0		0		1711						0	0						0	0						0	0						0	0
1712		0		0		0		0		0		0		0		0		1712						0	0						0	0						0	0						0	0
1713		0		0		0		0		0		0		0		0		1713						0	0						0	0						0	0						0	0
1714		0		0		0		0		0		0		0		0		1714						0	0						0	0						0	0						0	0
1715		0		0		0		0		0		0		0		0		1715						0	0						0	0						0	0						0	0
1716		0		0		0		0		0		0		0		0		1716						0	0						0	0						0	0						0	0
1717		0		0		0		0		0		0		0		0		1717						0	0						0	0						0	0						0	0
1718		0		0		0		0		0		0		0		0		1718						0	0						0	0						0	0						0	0
1719		0		0		0		0		0		0		0		0		1719						0	0						0	0						0	0						0	0
1720	6	10320	7	12040	3	5160		0	2	3440	4	6880	1	1720		0		1720	1236	1232	1255	1263	1247	1246.6	2144152	2487	2661	2606	2508	2628	2578	4434160	1203	1102	1100	1175	1174	1150.8	1979376						0	0	3224	3307	3348
1721		0		0		0		0		0		0		0		0		1721						0	0						0	0						0	0						0	0
1722		0		0		0		0		0		0		0		0		1722						0	0						0	0						0	0						0	0
1723		0		0		0		0		0		0		0		0		1723						0	0						0	0						0	0						0	0
1724		0		0		0		0		0		0		0		0		1724						0	0						0	0						0	0						0	0
1725		0		0		0		0		0		0		0		0		1725						0	0						0	0						0	0						0	0
1726		0		0		0		0		0		0		0		0		1726						0	0						0	0						0	0						0	0
1727		0		0		0		0		0		0		0		0		1727						0	0						0	0						0	0						0	0
1728		0		0		0		0		0		0		0		0		1728						0	0						0	0						0	0						0	0
1729		0		0		0		0		0		0		0		0		1729						0	0						0	0						0	0						0	0
1730	6	10380	11	19030		0	1	1730	4	6920	1	1730		0		0		1730	1859	1806	1873	1835	1773	1829.2	3164516	4322	4556	4788	4567	4601	4566.8	7900564	2586	2409	2363	2456	2479	2458.6	4253378						0	0	1591	1597	1692
1731		0		0		0		0		0		0		0		0		1731						0	0						0	0						0	0						0	0
1732		0		0		0		0		0		0		0		0		1732						0	0						0	0						0	0						0	0
1733		0		0		0		0		0		0		0		0		1733						0	0						0	0						0	0						0	0
1734		0		0		0		0		0		0		0		0		1734						0	0						0	0						0	0						0	0
1735		0		0		0		0		0		0		0		0		1735						0	0						0	0						0	0						0	0
1736		0		0		0		0		0		0		0		0		1736						0	0						0	0						0	0						0	0
1737		0		0		0		0		0		0		0		0		1737						0	0						0	0						0	0						0	0
1738		0		0		0		0		0		0		0		0		1738						0	0						0	0						0	0						0	0
1739		0		0		0		0		0		0		0		0		1739						0	0						0	0						0	0						0	0
1740	5	8700	6	10440	5	8700		0	8	13920		0	1	1740		0		1740	1854	1812	1858	1819	1781	1824.8	3175152	2473	2562	2749	2407	2546	2547.4	4432476	1221	1131	1106	1165	1118	1148.2	1997868						0	0	1737	1815	1870
1741		0		0		0		0		0		0		0		0		1741						0	0						0	0						0	0						0	0
1742		0		0		0		0		0		0		0		0		1742						0	0						0	0						0	0						0	0
1743		0		0		0		0		0		0		0		0		1743						0	0						0	0						0	0						0	0
1744		0		0		0		0		0		0		0		0		1744						0	0						0	0						0	0						0	0
1745		0		0		0		0		0		0		0		0		1745						0	0						0	0						0	0						0	0
1746		0		0		0		0		0		0		0		0		1746						0	0						0	0						0	0						0	0
1747		0		0		0		0		0		0		0		0		1747						0	0						0	0						0	0						0	0
1748		0		0		0		0		0		0		0		0		1748						0	0						0	0						0	0						0	0
1749		0		0		0		0		0		0		0		0		1749						0	0						0	0						0	0						0	0
1750	7	12250	5	8750	2	3500		0	8	14000		0	1	1750		0		1750	3483	3662	3739	3693	3533	3622	6338500	3469	3564	3679	3394	3509	3523	6165250	1850	1700	1731	1704	1703	1737.6	3040800						0	0	719	737	750
1751		0		0		0		0		0		0		0		0		1751						0	0						0	0						0	0						0	0
1752		0		0		0		0		0		0		0		0		1752						0	0						0	0						0	0						0	0
1753		0		0		0		0		0		0		0		0		1753						0	0						0	0						0	0						0	0
1754		0		0		0		0		0		0		0		0		1754						0	0						0	0						0	0						0	0
1755		0		0		0		0		0		0		0		0		1755						0	0						0	0						0	0						0	0
1756		0		0		0		0		0		0		0		0		1756						0	0						0	0						0	0						0	0
1757		0		0		0		0		0		0		0		0		1757						0	0						0	0						0	0						0	0
1758		0		0		0		0		0		0		0		0		1758						0	0						0	0						0	0						0	0
1759		0		0		0		0		0		0		0		0		1759						0	0						0	0						0	0						0	0
1760	6	10560	5	8800	5	8800		0	5	8800	3	5280	2	3520		0		1760	3645	3696	3730	3603	3599	3654.6	6432096	5450	5521	5766	5483	5602	5564.4	9793344		5	2	2	4	2.6	4576	1144	948	779	925	899	939	1652640	1444	1503	1459
1761		0		0		0		0		0		0		0		0		1761						0	0						0	0						0	0						0	0
1762		0		0		0		0		0		0		0		0		1762						0	0						0	0						0	0						0	0
1763		0		0		0		0		0		0		0		0		1763						0	0						0	0						0	0						0	0
1764		0		0		0		0		0		0		0		0		1764						0	0						0	0						0	0						0	0
1765		0		0		0		0		0		0		0		0		1765						0	0						0	0						0	0						0	0
1766		0		0		0		0		0		0		0		0		1766						0	0						0	0						0	0						0	0
1767		0		0		0		0		0		0		0		0		1767						0	0						0	0						0	0						0	0
1768		0		0		0		0		0		0		0		0		1768						0	0						0	0						0	0						0	0
1769		0		0		0		0		0		0		0		0		1769						0	0						0	0						0	0						0	0
1770	5	8850	10	17700	4	7080		0	4	7080	1	1770	1	1770		0		1770	3093	2984	3148	3022	2987	3046.8	5392836	3002	2977	3127	2924	3074	3020.8	5346816	3030	2848	2963	2890	3013	2948.8	5219376						0	0	2896	2995	2910
1771		0		0		0		0		0		0		0		0		1771						0	0						0	0						0	0						0	0
1772		0		0		0		0		0		0		0		0		1772						0	0						0	0						0	0						0	0
1773		0		0		0		0		0		0		0		0		1773						0	0						0	0						0	0						0	0
1774		0		0		0		0		0		0		0		0		1774						0	0						0	0						0	0						0	0
1775		0		0		0		0		0		0		0		0		1775						0	0						0	0						0	0						0	0
1776		0		0		0		0		0		0		0		0		1776						0	0						0	0						0	0						0	0
1777		0		0		0		0		0		0		0		0		1777						0	0						0	0						0	0						0	0
1778		0		0		0		0		0		0		0		0		1778						0	0						0	0						0	0						0	0
1779		0		0		0		0		0		0		0		0		1779						0	0						0	0						0	0						0	0
1780	7	12460	6	10680	3	5340		0	8	14240	1	1780	1	1780		0		1780	4326	4274	4394	4370	4163	4305.4	7.66361e+06	2473	2510	2653	2509	2542	2537.4	4516572	1223	1073	1118	1143	1157	1142.8	2034184						0	0	2770	3068	3035
1781		0		0		0		0		0		0		0		0		1781						0	0						0	0						0	0						0	0
1782		0		0		0		0		0		0		0		0		1782						0	0						0	0						0	0						0	0
1783		0		0		0		0		0		0		0		0		1783						0	0						0	0						0	0						0	0
1784		0		0		0		0		0		0		0		0		1784						0	0						0	0						0	0						0	0
1785		0		0		0		0		0		0		0		0		1785						0	0						0	0						0	0						0	0
1786		0		0		0		0		0		0		0		0		1786						0	0						0	0						0	0						0	0
1787		0		0		0		0		0		0		0		0		1787						0	0						0	0						0	0						0	0
1788		0		0		0		0		0		0		0		0		1788						0	0						0	0						0	0						0	0
1789		0		0		0		0		0		0		0		0		1789						0	0						0	0						0	0						0	0
1790	7	12530	5	8950	4	7160		0	5	8950	4	7160	3	5370		0		1790	3695	3675	3595	3773	3597	3667	6563930	2423	2460	2640	2493	2541	2511.4	4495406	3049	2750	2787	2856	2993	2887	5167730						0	0	1735	1881	1862
1791		0		0		0		0		0		0		0		0		1791						0	0						0	0						0	0						0	0
1792		0		0		0		0		0		0		0		0		1792						0	0						0	0						0	0						0	0
1793		0		0		0		0		0		0		0		0		1793						0	0						0	0						0	0						0	0
1794		0		0		0		0		0		0		0		0		1794						0	0						0	0						0	0						0	0
1795		0		0		0		0		0		0		0		0		1795						0	0						0	0						0	0						0	0
1796		0		0		0		0		0		0		0		0		1796						0	0						0	0						0	0						0	0
1797		0		0		0		0		0		0		0		0		1797						0	0						0	0						0	0						0	0
1798		0		0		0		0		0		0		0		0		1798						0	0						0	0						0	0						0	0
1799		0		0		0		0		0		0		0		0		1799						0	0						0	0						0	0						0	0
1800	5	9000	7	12600	3	5400		0	5	9000	4	7200	1	1800		0		1800	2950	3002	2961	2934	2939	2957.2	5322960	4854	4899	5221	4931	5044	4989.8	8981640	2564	2233	2237	2226	2364	2324.8	4.18464e+06						0	0	1441	1480	1514
1801		0		0		0		0		0		0		0		0		1801						0	0						0	0						0	0						0	0
1802		0		0		0		0		0		0		0		0		1802						0	0						0	0						0	0						0	0
1803		0		0		0		0		0		0		0		0		1803						0	0						0	0						0	0						0	0
1804		0		0		0		0		0		0		0		0		1804						0	0						0	0						0	0						0	0
1805		0		0		0		0		0		0		0		0		1805						0	0						0	0						0	0						0	0
1806		0		0		0		0		0		0		0		0		1806						0	0						0	0						0	0						0	0
1807		0		0		0		0		0		0		0		0		1807						0	0						0	0						0	0						0	0
1808		0		0		0		0		0		0		0		0		1808						0	0						0	0						0	0						0	0
1809		0		0		0		0		0		0		0		0		1809						0	0						0	0						0	0						0	0
1810	4	7240	8	14480	2	3620		0	6	10860	4	7240	1	1810		0		1810	4157	4130	4264	4230	4176	4191.4	7.58643e+06	2921	3026	3177	2954	3007	3017	5460770	1783	1776	1675	1635	1739	1721.6	3116096						0	0	2785	3058	2994
1811		0		0		0		0		0		0		0		0		1811						0	0						0	0						0	0						0	0
1812		0		0		0		0		0		0		0		0		1812						0	0						0	0						0	0						0	0
1813		0		0		0		0		0		0		0		0		1813						0	0						0	0						0	0						0	0
1814		0		0		0		0		0		0		0		0		1814						0	0						0	0						0	0						0	0
1815		0		0		0		0		0		0		0		0		1815						0	0						0	0						0	0						0	0
1816		0		0		0		0		0		0		0		0		1816						0	0						0	0						0	0						0	0
1817		0		0		0		0		0		0		0		0		1817						0	0						0	0						0	0						0	0
1818		0		0		0		0		0		0		0		0		1818						0	0						0	0						0	0						0	0
1819		0		0		0		0		0		0		0		0		1819						0	0						0	0						0	0						0	0
1820	4	7280	8	14560	4	7280		0	5	9100	1	1820	1	1820	1	1820		1820	4320	4282	4124	4279	4120	4225	7689500	2394	2452	2661	2538	2539	2516.8	4580576	2477	2272	2242	2348	2296	2327	4235140						0	0	1774	1882	1809
1821		0		0		0		0		0		0		0		0		1821						0	0						0	0						0	0						0	0
1822		0		0		0		0		0		0		0		0		1822						0	0						0	0						0	0						0	0
1823		0		0		0		0		0		0		0		0		1823						0	0						0	0						0	0						0	0
1824		0		0		0		0		0		0		0		0		1824						0	0						0	0						0	0						0	0
1825		0		0		0		0		0		0		0		0		1825						0	0						0	0						0	0						0	0
1826		0		0		0		0		0		0		0		0		1826						0	0						0	0						0	0						0	0
1827		0		0		0		0		0		0		0		0		1827						0	0						0	0						0	0						0	0
1828		0		0		0		0		0		0		0		0		1828						0	0						0	0						0	0						0	0
1829		0		0		0		0		0		0		0		0		1829						0	0						0	0						0	0						0	0
1830	4	7320	4	7320	2	3660		0	4	7320	1	1830	1	1830		0		1830	2843	3001	3048	3046	2957	2979	5451570	3343	3471	3676	3378	3466	3466.8	6344244	1797	1693	1719	1746	1663	1723.6	3154188						0	0	1807	1690	1772
1831		0		0		0		0		0		0		0		0		1831						0	0						0	0						0	0						0	0
1832		0		0		0		0		0		0		0		0		1832						0	0						0	0						0	0						0	0
1833		0		0		0		0		0		0		0		0		1833						0	0						0	0						0	0						0	0
1834		0		0		0		0		0		0		0		0		1834						0	0						0	0						0	0						0	0
1835		0		0		0		0		0		0		0		0		1835						0	0						0	0						0	0						0	0
1836		0		0		0		0		0		0		0		0		1836						0	0						0	0						0	0						0	0
1837		0		0		0		0		0		0		0		0		1837						0	0						0	0						0	0						0	0
1838		0		0		0		0		0		0		0		0		1838						0	0						0	0						0	0						0	0
1839		0		0		0		0		0		0		0		0		1839						0	0						0	0						0	0						0	0
1840	4	7360	7	12880	3	5520		0	6	11040	2	3680	1	1840	1	1840		1840	2296	2486	2528	2404	2347	2412.2	4438448	3780	3910	3997	3944	3993	3924.8	7221632	1262	1086	1123	1120	1135	1145.2	2107168						0	0	2072	2147	2207
1841		0		0		0		0		0		0		0		0		1841						0	0						0	0						0	0						0	0
1842		0		0		0		0		0		0		0		0		1842						0	0						0	0						0	0						0	0
1843		0		0		0		0		0		0		0		0		1843						0	0						0	0						0	0						0	0
1844		0		0		0		0		0		0		0		0		1844						0	0						0	0						0	0						0	0
1845		0		0		0		0		0		0		0		0		1845						0	0						0	0						0	0						0	0
1846		0		0		0		0		0		0		0		0		1846						0	0						0	0						0	0						0	0
1847		0		0		0		0		0		0		0		0		1847						0	0						0	0						0	0						0	0
1848		0		0		0		0		0		0		0		0		1848						0	0						0	0						0	0						0	0
1849		0		0		0		0		0		0		0		0		1849						0	0						0	0						0	0						0	0
1850	5	9250	2	3700	1	1850		0	5	9250	4	7400	1	1850		0		1850	2253	2336	2358	2412	2335	2338.8	4326780	3636	3955	4040	3733	3799	3832.6	7090310	2453	2241	2120	2272	2257	2268.6	4196910						0	0	1740	1810	1795
1851		0		0		0		0		0		0		0		0		1851						0	0						0	0						0	0						0	0
1852		0		0		0		0		0		0		0		0		1852						0	0						0	0						0	0						0	0
1853		0		0		0		0		0		0		0		0		1853						0	0						0	0						0	0						0	0
1854		0		0		0		0		0		0		0		0		1854						0	0						0	0						0	0						0	0
1855		0		0		0		0		0		0		0		0		1855						0	0						0	0						0	0						0	0
1856		0		0		0		0		0		0		0		0		1856						0	0						0	0						0	0						0	0
1857		0		0		0		0		0		0		0		0		1857						0	0						0	0						0	0						0	0
1858		0		0		0		0		0		0		0		0		1858						0	0						0	0						0	0						0	0
1859		0		0		0		0		0		0		0		0		1859						0	0						0	0						0	0						0	0
1860	3	5580	7	13020	2	3720		0	3	5580	3	5580		0	1	1860		1860	2287	2349	2333	2342	2252	2312.6	4301436	1867	1999	1987	1964	2001	1963.6	3652296	1183	1111	1150	1132	1170	1149.2	2137512	34	25	23	36	17	27	50220	1438	1412	1396
1861		0		0		0		0		0		0		0		0		1861						0	0						0	0						0	0						0	0
1862		0		0		0		0		0		0		0		0		1862						0	0						0	0						0	0						0	0
1863		0		0		0		0		0		0		0		0		1863						0	0						0	0						0	0						0	0
1864		0		0		0		0		0		0		0		0		1864						0	0						0	0						0	0						0	0
1865		0		0		0		0		0		0		0		0		1865						0	0						0	0						0	0						0	0
1866		0		0		0		0		0		0		0		0		1866						0	0						0	0						0	0						0	0
1867		0		0		0		0		0		0		0		0		1867						0	0						0	0						0	0						0	0
1868		0		0		0		0		0		0		0		0		1868						0	0						0	0						0	0						0	0
1869		0		0		0		0		0		0		0		0		1869						0	0						0	0						0	0						0	0
1870	4	7480	2	3740	3	5610		0	2	3740	4	7480	3	5610		0		1870	2314	2265	2234	2266	2229	2261.6	4229192	3316	3379	3562	3248	3341	3369.2	6300404	1676	1647	1650	1716	1727	1683.2	3147584						0	0	2095	2138	2018
1871		0		0		0		0		0		0		0		0		1871						0	0						0	0						0	0						0	0
1872		0		0		0		0		0		0		0		0		1872						0	0						0	0						0	0						0	0
1873		0		0		0		0		0		0		0		0		1873						0	0						0	0						0	0						0	0
1874		0		0		0		0		0		0		0		0		1874						0	0						0	0						0	0						0	0
1875		0		0		0		0		0		0		0		0		1875						0	0						0	0						0	0						0	0
1876		0		0		0		0		0		0		0		0		1876						0	0						0	0						0	0						0	0
1877		0		0		0		0		0		0		0		0		1877						0	0						0	0						0	0						0	0
1878		0		0		0		0		0		0		0		0		1878						0	0						0	0						0	0						0	0
1879		0		0		0		0		0		0		0		0		1879						0	0						0	0						0	0						0	0
1880	7	13160	4	7520	4	7520		0	2	3760	3	5640	1	1880		0		1880	2838	2830	2893	2745	2805	2822.2	5305736	951	984	952	893	969	949.8	1785624	576	517	547	591	559	558	1049040						0	0	1696	1729	1760
1881		0		0		0		0		0		0		0		0		1881						0	0						0	0						0	0						0	0
1882		0		0		0		0		0		0		0		0		1882						0	0						0	0						0	0						0	0
1883		0		0		0		0		0		0		0		0		1883						0	0						0	0						0	0						0	0
1884		0		0		0		0		0		0		0		0		1884						0	0						0	0						0	0						0	0
1885		0		0		0		0		0		0		0		0		1885						0	0						0	0						0	0						0	0
1886		0		0		0		0		0		0		0		0		1886						0	0						0	0						0	0						0	0
1887		0		0		0		0		0		0		0		0		1887						0	0						0	0						0	0						0	0
1888		0		0		0		0		0		0		0		0		1888						0	0						0	0						0	0						0	0
1889		0		0		0		0		0		0		0		0		1889						0	0						0	0						0	0						0	0
1890	3	5670	7	13230		0		0	8	15120	3	5670	1	1890	1	1890		1890	1639	1675	1645	1669	1610	1647.6	3113964	3258	3293	3455	3275	3196	3295.4	6228306	1224	1083	1097	1116	1087	1121.4	2119446						0	0	1023	1006	1027
1891		0		0		0		0		0		0		0		0		1891						0	0						0	0						0	0						0	0
1892		0		0		0		0		0		0		0		0		1892						0	0						0	0						0	0						0	0
1893		0		0		0		0		0		0		0		0		1893						0	0						0	0						0	0						0	0
1894		0		0		0		0		0		0		0		0		1894						0	0						0	0						0	0						0	0
1895		0		0		0		0		0		0		0		0		1895						0	0						0	0						0	0						0	0
1896		0		0		0		0		0		0		0		0		1896						0	0						0	0						0	0						0	0
1897		0		0		0		0		0		0		0		0		1897						0	0						0	0						0	0						0	0
1898		0		0		0		0		0		0		0		0		1898						0	0						0	0						0	0						0	0
1899		0		0		0		0		0		0		0		0		1899						0	0						0	0						0	0						0	0
1900		0	6	11400	1	1900		0	11	20900	4	7600		0		0		1900	2178	2260	2330	2265	2147	2236	4248400	905	940	1038	941	971	959	1822100	1693	1621	1615	1672	1666	1653.4	3141460						0	0	635	697	707
1901		0		0		0		0		0		0		0		0		1901						0	0						0	0						0	0						0	0
1902		0		0		0		0		0		0		0		0		1902						0	0						0	0						0	0						0	0
1903		0		0		0		0		0		0		0		0		1903						0	0						0	0						0	0						0	0
1904		0		0		0		0		0		0		0		0		1904						0	0						0	0						0	0						0	0
1905		0		0		0		0		0		0		0		0		1905						0	0						0	0						0	0						0	0
1906		0		0		0		0		0		0		0		0		1906						0	0						0	0						0	0						0	0
1907		0		0		0		0		0		0		0		0		1907						0	0						0	0						0	0						0	0
1908		0		0		0		0		0		0		0		0		1908						0	0						0	0						0	0						0	0
1909		0		0		0		0		0		0		0		0		1909						0	0						0	0						0	0						0	0
1910	3	5730	5	9550	3	5730		0	2	3820	1	1910	3	5730		0		1910	3824	3827	3838	3825	3730	3808.8	7274808	1786	1889	1970	1769	1897	1862.2	3556802	2294	2117	2082	2124	2205	2164.4	4134004						0	0	641	699	680
1911		0		0		0		0		0		0		0		0		1911						0	0						0	0						0	0						0	0
1912		0		0		0		0		0		0		0		0		1912						0	0						0	0						0	0						0	0
1913		0		0		0		0		0		0		0		0		1913						0	0						0	0						0	0						0	0
1914		0		0		0		0		0		0		0		0		1914						0	0						0	0						0	0						0	0
1915		0		0		0		0		0		0		0		0		1915						0	0						0	0						0	0						0	0
1916		0		0		0		0		0		0		0		0		1916						0	0						0	0						0	0						0	0
1917		0		0		0		0		0		0		0		0		1917						0	0						0	0						0	0						0	0
1918		0		0		0		0		0		0		0		0		1918						0	0						0	0						0	0						0	0
1919		0		0		0		0		0		0		0		0		1919						0	0						0	0						0	0						0	0
1920	3	5760	5	9600	4	7680		0	3	5760	2	3840	1	1920		0		1920	1576	1619	1614	1701	1604	1622.8	3115776	3141	3171	3407	3116	3300	3227	6195840	5	9	4	6	6	6	11520						0	0	2699	2631	2815
1921		0		0		0		0		0		0		0		0		1921						0	0						0	0						0	0						0	0
1922		0		0		0		0		0		0		0		0		1922						0	0						0	0						0	0						0	0
1923		0		0		0		0		0		0		0		0		1923						0	0						0	0						0	0						0	0
1924		0		0		0		0		0		0		0		0		1924						0	0						0	0						0	0						0	0
1925		0		0		0		0		0		0		0		0		1925						0	0						0	0						0	0						0	0
1926		0		0		0		0		0		0		0		0		1926						0	0						0	0						0	0						0	0
1927		0		0		0		0		0		0		0		0		1927						0	0						0	0						0	0						0	0
1928		0		0		0		0		0		0		0		0		1928						0	0						0	0						0	0						0	0
1929		0		0		0		0		0		0		0		0		1929						0	0						0	0						0	0						0	0
1930	5	9650	5	9650	6	11580		0	1	1930	5	9650	2	3860		0		1930						0	0	2695	2786	2912	2754	2689	2767.2	5340696	588	573	561	512	539	554.6	1070378						0	0	3684	3977	3829
1931		0		0		0		0		0		0		0		0		1931						0	0						0	0						0	0						0	0
1932		0		0		0		0		0		0		0		0		1932						0	0						0	0						0	0						0	0
1933		0		0		0		0		0		0		0		0		1933						0	0						0	0						0	0						0	0
1934		0		0		0		0		0		0		0		0		1934						0	0						0	0						0	0						0	0
1935		0		0		0		0		0		0		0		0		1935						0	0						0	0						0	0						0	0
1936		0		0		0		0		0		0		0		0		1936						0	0						0	0						0	0						0	0
1937		0		0		0		0		0		0		0		0		1937						0	0						0	0						0	0						0	0
1938		0		0		0		0		0		0		0		0		1938						0	0						0	0						0	0						0	0
1939		0		0		0		0		0		0		0		0		1939						0	0						0	0						0	0						0	0
1940	3	5820	7	13580	2	3880		0	5	9700	7	13580	5	9700		0		1940	1628	1641	1543	1610	1558	1596	3096240	2239	2135	2344	2211	2279	2241.6	4348704	1658	1570	1550	1573	1523	1574.8	3055112						0	0	635	642	679
1941		0		0		0		0		0		0		0		0		1941						0	0						0	0						0	0						0	0
1942		0		0		0		0		0		0		0		0		1942						0	0						0	0						0	0						0	0
1943		0		0		0		0		0		0		0		0		1943						0	0						0	0						0	0						0	0
1944		0		0		0		0		0		0		0		0		1944						0	0						0	0						0	0						0	0
1945		0		0		0		0		0		0		0		0		1945						0	0						0	0						0	0						0	0
1946		0		0		0		0		0		0		0		0		1946						0	0						0	0						0	0						0	0
1947		0		0		0		0		0		0		0		0		1947						0	0						0	0						0	0						0	0
1948		0		0		0		0		0		0		0		0		1948						0	0						0	0						0	0						0	0
1949		0		0		0		0		0		0		0		0		1949						0	0						0	0						0	0						0	0
1950	1	1950	3	5850	1	1950		0	3	5850	2	3900	3	5850		0		1950	1505	1517	1566	1536	1521	1529	2981550	2237	2207	2331	2320	2134	2245.8	4379310	2192	1918	1960	2012	2030	2022.4	3943680						0	0	951	1012	971
1951		0		0		0		0		0		0		0		0		1951						0	0						0	0						0	0						0	0
1952		0		0		0		0		0		0		0		0		1952						0	0						0	0						0	0						0	0
1953		0		0		0		0		0		0		0		0		1953						0	0						0	0						0	0						0	0
1954		0		0		0		0		0		0		0		0		1954						0	0						0	0						0	0						0	0
1955		0		0		0		0		0		0		0		0		1955						0	0						0	0						0	0						0	0
1956		0		0		0		0		0		0		0		0		1956						0	0						0	0						0	0						0	0
1957		0		0		0		0		0		0		0		0		1957						0	0						0	0						0	0						0	0
1958		0		0		0		0		0		0		0		0		1958						0	0						0	0						0	0						0	0
1959		0		0		0		0		0		0		0		0		1959						0	0						0	0						0	0						0	0
1960	4	7840	5	9800	1	1960		0	6	11760	4	7840		0		0		1960	2515	2590	2602	2590	2434	2546.2	4990552	2163	2227	2457	2268	2289	2280.8	4470368	3206	2968	2984	3133	3101	3078.4	6033664						0	0	316	302	308
1961		0		0		0		0		0		0		0		0		1961						0	0						0	0						0	0						0	0
1962		0		0		0		0		0		0		0		0		1962						0	0						0	0						0	0						0	0
1963		0		0		0		0		0		0		0		0		1963						0	0						0	0						0	0						0	0
1964		0		0		0		0		0		0		0		0		1964						0	0						0	0						0	0						0	0
1965		0		0		0		0		0		0		0		0		1965						0	0						0	0						0	0						0	0
1966		0		0		0		0		0		0		0		0		1966						0	0						0	0						0	0						0	0
1967		0		0		0		0		0		0		0		0		1967						0	0						0	0						0	0						0	0
1968		0		0		0		0		0		0		0		0		1968						0	0						0	0						0	0						0	0
1969		0		0		0		0		0		0		0		0		1969						0	0						0	0						0	0						0	0
1970	3	5910	1	1970	5	9850		0	2	3940	1	1970	2	3940	1	1970		1970	1554	1532	1575	1506	1476	1528.6	3011342	3083	3114	3286	3091	3195	3153.8	6212986	1053	972	1032	1027	1040	1024.8	2018856						0	0	1493	1543	1622
1971		0		0		0		0		0		0		0		0		1971						0	0						0	0						0	0						0	0
1972		0		0		0		0		0		0		0		0		1972						0	0						0	0						0	0						0	0
1973		0		0		0		0		0		0		0		0		1973						0	0						0	0						0	0						0	0
1974		0		0		0		0		0		0		0		0		1974						0	0						0	0						0	0						0	0
1975		0		0		0		0		0		0		0		0		1975						0	0						0	0						0	0						0	0
1976		0		0		0		0		0		0		0		0		1976						0	0						0	0						0	0						0	0
1977		0		0		0		0		0		0		0		0		1977						0	0						0	0						0	0						0	0
1978		0		0		0		0		0		0		0		0		1978						0	0						0	0						0	0						0	0
1979		0		0		0		0		0		0		0		0		1979						0	0						0	0						0	0						0	0
1980	4	7920	3	5940	1	1980		0		0	2	3960	2	3960		0		1980	496	502	503	480	484	493	976140	1253	1412	1372	1306	1335	1335.6	2644488	540	482	502	485	496	501	991980						0	0	899	931	930
1981		0		0		0		0		0		0		0		0		1981						0	0						0	0						0	0						0	0
1982		0		0		0		0		0		0		0		0		1982						0	0						0	0						0	0						0	0
1983		0		0		0		0		0		0		0		0		1983						0	0						0	0						0	0						0	0
1984		0		0		0		0		0		0		0		0		1984						0	0						0	0						0	0						0	0
1985		0		0		0		0		0		0		0		0		1985						0	0						0	0						0	0						0	0
1986		0		0		0		0		0		0		0		0		1986						0	0						0	0						0	0						0	0
1987		0		0		0		0		0		0		0		0		1987						0	0						0	0						0	0						0	0
1988		0		0		0		0		0		0		0		0		1988						0	0						0	0						0	0						0	0
1989		0		0		0		0		0		0		0		0		1989						0	0						0	0						0	0						0	0
1990	2	3980	4	7960	2	3980		0	5	9950	1	1990	1	1990		0		1990	1910	1961	2042	1963	1882	1951.6	3883684	2147	2167	2281	2193	2318	2221.2	4420188	530	521	505	491	527	514.8	1.02445e+06						0	0	1744	1837	1916
1991		0		0		0		0		0		0		0		0		1991						0	0						0	0						0	0						0	0
1992		0		0		0		0		0		0		0		0		1992						0	0						0	0						0	0						0	0
1993		0		0		0		0		0		0		0		0		1993						0	0						0	0						0	0						0	0
1994		0		0		0		0		0		0		0		0		1994						0	0						0	0						0	0						0	0
1995		0		0		0		0		0		0		0		0		1995						0	0						0	0						0	0						0	0
1996		0		0		0		0		0		0		0		0		1996						0	0						0	0						0	0						0	0
[truncated: 2,017 more rows]
[truncated: 25 more columns]
