# Supplementary material for: Empirical single-cell tracking and cell-fate simulation reveal dual roles of p53 in tumor suppression
Source: eLife. 2022 Sep 20;11:e72498. doi: 10.7554/eLife.72498 (PMC9560164; doi:10.7554/eLife.72498)
Supplement: Figure 9—figure supplement 2—source data 1. — Data used in Figure 9—figure supplement 2. [file elife-72498-fig9-figsupp2-data1.xlsx]

## Sheet: Figure 9-supplement 2
Single-cell tracking						Simulation
Control	Event	No of eents	Event/cell			Control-sim	Event	No of eents	Event/cell		MNNG1-sim	Event	No of eents	Event/cell		MNNG3-sim	Event	No of eents	Event/cell		MNNG7-sim	Event	No of eents	Event/cell		p53 RNAi-sim	Event	No of eents	Event/cell		p53 RNAi-MNNG1-sim	Event	No of eents	Event/cell		p53 RNAi-MNNG3-sim	Event	No of eents	Event/cell		p53 RNAi-MNNG7-sim	Event	No of eents	Event/cell
	MD	2	0.112233				MD	15	0.252483			MD	22	0.363396			MD	12	0.235479			MD	0	0			MD	85	1.48161			MD	60	1.16279			MD	44	1.15244			MD	9	0.549115
	CD	6	0.3367				CD	46	0.77428			CD	39	0.644202			CD	8	0.156986			CD	15	1.21753			CD	182	3.17239			CD	130	2.51938			CD	104	2.72394			CD	74	4.51495
	CF	6	0.3367				CF	40	0.673287			CF	25	0.41295			CF	47	0.922292			CF	8	0.649351			CF	165	2.87607			CF	86	1.66667			CF	78	2.04295			CF	16	0.976205
	Cell	1782					Cell	5941				Cell	6054				Cell	5096				Cell	1232				Cell	5737				Cell	5160				Cell	3818				Cell	1639
MNNG1	Event	No of eents	Event/cell			Control-sim	Event	No of eents	Event/cell		MNNG1-sim	Event	No of eents	Event/cell		MNNG3-sim	Event	No of eents	Event/cell		MNNG7-sim	Event	No of eents	Event/cell		p53 RNAi-sim	Event	No of eents	Event/cell		p53 RNAi-MNNG1-sim	Event	No of eents	Event/cell		p53 RNAi-MNNG3-sim	Event	No of eents	Event/cell		p53 RNAi-MNNG7-sim	Event	No of eents	Event/cell
	TD	1	0.0525762				MD	21	0.348721			MD	25	0.394508			MD	16	0.330306			MD	0	0			MD	60	1.03235			MD	59	1.11637			MD	46	1.23258			MD	8	0.484848
	CD	3	0.157729				CD	37	0.614414			CD	40	0.631214			CD	4	0.0825764			CD	14	1.14943			CD	177	3.04542			CD	120	2.27058			CD	90	2.41158			CD	52	3.15152
	CF	3	0.157729				CF	54	0.896712			CF	22	0.347167			CF	49	1.01156			CF	3	0.246305			CF	130	2.23675			CF	100	1.89215			CF	88	2.35798			CF	11	0.666667
	Cell	1902					Cell	6022				Cell	6337				Cell	4844				Cell	1218				Cell	5812				Cell	5285				Cell	3732				Cell	1650
MNNG3	Event	No of eents	Event/cell			Control-sim	Event	No of eents	Event/cell		MNNG1-sim	Event	No of eents	Event/cell		MNNG3-sim	Event	No of eents	Event/cell		MNNG7-sim	Event	No of eents	Event/cell		p53 RNAi-sim	Event	No of eents	Event/cell		p53 RNAi-MNNG1-sim	Event	No of eents	Event/cell		p53 RNAi-MNNG3-sim	Event	No of eents	Event/cell		p53 RNAi-MNNG7-sim	Event	No of eents	Event/cell
	TD	2	0.13132				MD	32	0.523389			MD	16	0.245324			MD	19	0.394109			MD	0	0			MD	88	1.48373			MD	51	0.983417			MD	53	1.3727			MD	11	0.669507
	CD	1	0.0656599				CD	43	0.703304			CD	43	0.659307			CD	3	0.0622278			CD	25	2.10793			CD	179	3.01804			CD	139	2.68029			CD	106	2.7454			CD	50	3.04321
	CF	5	0.328299				CF	74	1.21034			CF	20	0.306654			CF	52	1.07861			CF	3	0.252951			CF	163	2.74827			CF	90	1.73544			CF	85	2.2015			CF	7	0.42605
	Cell	1523					Cell	6114				Cell	6522				Cell	4821				Cell	1186				Cell	5931				Cell	5186				Cell	3861				Cell	1643
MNNG7	Event	No of eents	Event/cell			Control-sim	Event	No of eents	Event/cell		MNNG1-sim	Event	No of eents	Event/cell		MNNG3-sim	Event	No of eents	Event/cell		MNNG7-sim	Event	No of eents	Event/cell		p53 RNAi-sim	Event	No of eents	Event/cell		p53 RNAi-MNNG1-sim	Event	No of eents	Event/cell		p53 RNAi-MNNG3-sim	Event	No of eents	Event/cell		p53 RNAi-MNNG7-sim	Event	No of eents	Event/cell
	TD	0	0				MD	15	0.25113			MD	28	0.452928			MD	19	0.392157			MD	0	0			MD	81	1.34955			MD	54	1.07356			MD	44	1.13813			MD	12	0.78534
	CD	9	1.94384				CD	52	0.870584			CD	50	0.8088			CD	10	0.206398			CD	17	1.42379			CD	185	3.08231			CD	138	2.74354			CD	102	2.63839			CD	56	3.66492
	CF	6	1.2959				CF	46	0.770132			CF	18	0.291168			CF	61	1.25903			CF	7	0.586265			CF	151	2.51583			CF	86	1.70974			CF	81	2.09519			CF	18	1.17801
	Cell	463					Cell	5973				Cell	6182				Cell	4845				Cell	1194				Cell	6002				Cell	5030				Cell	3866				Cell	1528
p53Si	Event	No of eents	Event/cell			Control-sim	Event	No of eents	Event/cell		MNNG1-sim	Event	No of eents	Event/cell		MNNG3-sim	Event	No of eents	Event/cell		MNNG7-sim	Event	No of eents	Event/cell		p53 RNAi-sim	Event	No of eents	Event/cell		p53 RNAi-MNNG1-sim	Event	No of eents	Event/cell		p53 RNAi-MNNG3-sim	Event	No of eents	Event/cell		p53 RNAi-MNNG7-sim	Event	No of eents	Event/cell
	TD	19	1.02371				MD	20	0.342583			MD	29	0.460171			MD	16	0.328677			MD	0	0			MD	79	1.33989			MD	58	1.12643			MD	53	1.34143			MD	11	0.694883
	CD	50	2.69397				CD	46	0.787941			CD	40	0.634719			CD	9	0.184881			CD	15	1.25628			CD	207	3.51085			CD	140	2.71897			CD	87	2.20197			CD	59	3.7271
	CF	31	1.67026				CF	52	0.890716			CF	12	0.190416			CF	49	1.00657			CF	4	0.335008			CF	142	2.40841			CF	91	1.76733			CF	77	1.94887			CF	19	1.20025
	Cell	1856					Cell	5838				Cell	6302				Cell	4868				Cell	1194				Cell	5896				Cell	5149				Cell	3951				Cell	1583
p53 RNAi-MNNG1	Event	No of eents	Event/cell			Control-sim	Event	No of eents	Event/cell		MNNG1-sim	Event	No of eents	Event/cell		MNNG3-sim	Event	No of eents	Event/cell		MNNG7-sim	Event	No of eents	Event/cell		p53 RNAi-sim	Event	No of eents	Event/cell		p53 RNAi-MNNG1-sim	Event	No of eents	Event/cell		p53 RNAi-MNNG3-sim	Event	No of eents	Event/cell		p53 RNAi-MNNG7-sim	Event	No of eents	Event/cell
	TD	14	0.902643				MD	16	0.267603			MD	38	0.610344			MD	17	0.345458			MD	0	0			MD	99	1.6926			MD	54	1.03093			MD	48	1.2314			MD	12	0.75662
	CD	34	2.19213				CD	44	0.735909			CD	50	0.803084			CD	12	0.243853			CD	10	0.827815			CD	169	2.88938			CD	138	2.63459			CD	108	2.77065			CD	55	3.46784
	CF	26	1.67634				CF	42	0.702459			CF	19	0.305172			CF	57	1.1583			CF	2	0.165563			CF	177	3.02616			CF	87	1.66094			CF	78	2.00103			CF	19	1.19798
	Cell	1551					Cell	5979				Cell	6226				Cell	4921				Cell	1208				Cell	5849				Cell	5238				Cell	3898				Cell	1586
p53 RNAi-MNNG3	Event	No of eents	Event/cell			Control-sim	Event	No of eents	Event/cell		MNNG1-sim	Event	No of eents	Event/cell		MNNG3-sim	Event	No of eents	Event/cell		MNNG7-sim	Event	No of eents	Event/cell		p53 RNAi-sim	Event	No of eents	Event/cell		p53 RNAi-MNNG1-sim	Event	No of eents	Event/cell		p53 RNAi-MNNG3-sim	Event	No of eents	Event/cell		p53 RNAi-MNNG7-sim	Event	No of eents	Event/cell
	TD	13	1.00853				MD	17	0.283286			MD	25	0.394135			MD	12	0.243112			MD	0	0			MD	65	1.12476			MD	51	1.00137			MD	46	1.17407			MD	13	0.793167
	CD	31	2.40497				CD	36	0.5999			CD	46	0.725209			CD	8	0.162075			CD	10	0.85034			CD	155	2.68212			CD	117	2.29727			CD	111	2.83308			CD	60	3.66077
	CF	23	1.78433				CF	44	0.733211			CF	20	0.315308			CF	40	0.810373			CF	4	0.340136			CF	129	2.23222			CF	77	1.51188			CF	101	2.57785			CF	22	1.34228
	Cell	1289					Cell	6001				Cell	6343				Cell	4936				Cell	1176				Cell	5779				Cell	5093				Cell	3918				Cell	1639
p53 RNAi-MNNG7	Event	No of eents	Event/cell			Control-sim	Event	No of eents	Event/cell		MNNG1-sim	Event	No of eents	Event/cell		MNNG3-sim	Event	No of eents	Event/cell		MNNG7-sim	Event	No of eents	Event/cell		p53 RNAi-sim	Event	No of eents	Event/cell		p53 RNAi-MNNG1-sim	Event	No of eents	Event/cell		p53 RNAi-MNNG3-sim	Event	No of eents	Event/cell		p53 RNAi-MNNG7-sim	Event	No of eents	Event/cell
	TD	3	0.480769				MD	23	0.395053			MD	23	0.371147			MD	19	0.380533			MD	0	0			MD	94	1.60876			MD	53	0.991952			MD	33	0.863648			MD	12	0.739827
	CD	29	4.64744				CD	41	0.704225			CD	37	0.597063			CD	10	0.20028			CD	16	1.34228			CD	182	3.11484			CD	128	2.39566			CD	86	2.25072			CD	50	3.08261
	CF	10	1.60256				CF	55	0.944693			CF	11	0.177505			CF	61	1.22171			CF	3	0.251678			CF	181	3.09772			CF	100	1.87161			CF	65	1.70113			CF	21	1.2947
	Cell	624					Cell	5822				Cell	6197				Cell	4993				Cell	1192				Cell	5843				Cell	5343				Cell	3821				Cell	1622
						Control-sim	Event	No of eents	Event/cell		MNNG1-sim	Event	No of eents	Event/cell		MNNG3-sim	Event	No of eents	Event/cell		MNNG7-sim	Event	No of eents	Event/cell		p53 RNAi-sim	Event	No of eents	Event/cell		p53 RNAi-MNNG1-sim	Event	No of eents	Event/cell		p53 RNAi-MNNG3-sim	Event	No of eents	Event/cell		p53 RNAi-MNNG7-sim	Event	No of eents	Event/cell
MD: Multipolar cell division							MD	13	0.217792			MD	24	0.385356			MD	17	0.351458			MD	0	0			MD	72	1.26095			MD	63	1.16927			MD	58	1.50806			MD	14	0.887199
CD: Cell death							CD	38	0.636623			CD	46	0.7386			CD	11	0.227414			CD	18	1.50754			CD	197	3.45009			CD	133	2.46845			CD	96	2.4961			CD	61	3.86565
CF: Cell fusion							CF	39	0.653376			CF	16	0.256904			CF	56	1.15774			CF	4	0.335008			CF	133	2.32925			CF	101	1.87454			CF	84	2.18409			CF	20	1.26743
							Cell	5969				Cell	6228				Cell	4837				Cell	1194				Cell	5710				Cell	5388				Cell	3846				Cell	1578
						Control-sim	Event	No of eents	Event/cell		MNNG1-sim	Event	No of eents	Event/cell		MNNG3-sim	Event	No of eents	Event/cell		MNNG7-sim	Event	No of eents	Event/cell		p53 RNAi-sim	Event	No of eents	Event/cell		p53 RNAi-MNNG1-sim	Event	No of eents	Event/cell		p53 RNAi-MNNG3-sim	Event	No of eents	Event/cell		p53 RNAi-MNNG7-sim	Event	No of eents	Event/cell
							MD	10	0.171174			MD	22	0.355527			MD	17	0.337637			MD	0	0			MD	67	1.14962			MD	64	1.28102			MD	34	0.873811			MD	9	0.574346
							CD	45	0.770284			CD	57	0.921138			CD	4	0.0794439			CD	22	1.80328			CD	152	2.6081			CD	138	2.76221			CD	95	2.44153			CD	51	3.25463
							CF	27	0.46217			CF	17	0.274725			CF	53	1.05263			CF	7	0.57377			CF	122	2.09334			CF	114	2.28183			CF	67	1.72192			CF	16	1.02106
							Cell	5842				Cell	6188				Cell	5035				Cell	1220				Cell	5828				Cell	4996				Cell	3891				Cell	1567
