# Supplementary material for: Empirical single-cell tracking and cell-fate simulation reveal dual roles of p53 in tumor suppression
Source: eLife. 2022 Sep 20;11:e72498. doi: 10.7554/eLife.72498 (PMC9560164; doi:10.7554/eLife.72498)
Supplement: Figure 9—source data 1. — Data used in Figure 9. [file elife-72498-fig9-data1.xlsx]

## Sheet: No of cells
Single-cell tracking (normalized to 100)										Simulation (normalized to 100)
	No of cells										No of cells
Time	Control	MNNG1	MMMG3	MMMG7	p53 RNAi	p53 RNAi-MNNG1	p53 RNAi-MNNG3	p53 RNAi-MNNG7		Time	Control-sim	Control-sim	Control-sim	Control-sim	Control-sim	MNNG1-sim	MNNG1-sim	MNNG1-sim	MNNG1-sim	MNNG1-sim	MMMG3-sim	MMMG3-sim	MMMG3-sim	MMMG3-sim	MMMG3-sim	MMMG7-sim	MMMG7-sim	MMMG7-sim	MMMG7-sim	MMMG7-sim	p53 RNAi-sim	p53 RNAi-sim	p53 RNAi-sim	p53 RNAi-sim	p53 RNAi-sim	p53 RNAi-MNNG1-sim	p53 RNAi-MNNG1-sim	p53 RNAi-MNNG1-sim	p53 RNAi-MNNG1-sim	p53 RNAi-MNNG1-sim	p53 RNAi-MNNG3-sim	p53 RNAi-MNNG3-sim	p53 RNAi-MNNG3-sim	p53 RNAi-MNNG3-sim	p53 RNAi-MNNG3-sim	p53 RNAi-MNNG7-sim	p53 RNAi-MNNG7-sim	p53 RNAi-MNNG7-sim	p53 RNAi-MNNG7-sim
0	100	100	100	100	100	100	100	100		0	100	100	100	100	100	100	100	100	100	100	100	100	100	100	100	100	100	100	100	100	100	100	100	100	100	100	100	100	100	100	100	100	100	100	100	100	100	100	100
1	100	100	100	100	100	100	100	100		1	100	100	100	100	100	100	100	100	100	100	100	100	100	100	100	100	100	100	100	100	100	100	100	100	100	100	100	100	100	100	100	100	100	100	100	100	100	100	100
2	100	100	100	100	100	100	100	100		2	100	100	100	100	100	100	100	100	100	100	100	100	100	100	100	100	100	100	100	100	100	100	100	100	100	100	100	100	100	100	100	100	100	100	100	100	100	100	100
3	101	100	101	100	100	100	101	100		3	100	100	100	100	100	100	100	100	100	100	100	100	100	100	100	100	100	100	100	100	100	100	100	100	100	100	100	100	100	100	100	100	100	100	100	100	100	100	100
4	101	100	101	100	100	101	101	100		4	100	100	100	100	100	100	100	100	100	100	100	100	100	100	100	100	100	100	100	100	100	100	99	100	100	100	100	100	100	100	100	100	99	100	100	99	100	100	99
5	101	100	101	100	100	101	102	100		5	100	100	100	101	100	100	100	100	100	100	101	100	101	100	100	100	100	100	100	100	100	100	100	100	100	100	100	100	100	100	101	100	100	101	101	100	100	100	99
6	101	101	102	100	101	102	102	100		6	100	101	101	101	101	100	101	100	101	101	101	100	101	100	100	100	100	100	100	100	100	101	100	100	100	100	101	101	101	101	101	100	100	101	101	100	100	100	99
7	101	101	102	100	102	102	102	101		7	100	101	101	101	101	100	101	100	101	101	102	101	101	101	101	100	100	100	100	100	100	101	101	101	101	100	101	101	101	101	101	101	102	102	101	100	100	100	99
8	102	101	102	100	102	102	102	101		8	100	101	101	101	101	100	101	101	101	101	102	102	102	102	102	100	100	100	100	100	101	102	101	101	101	101	101	102	101	101	101	101	102	102	101	100	100	100	99
9	102	101	102	101	102	102	102	101		9	102	102	102	101	102	101	101	101	101	101	102	102	102	102	102	100	100	100	100	100	102	103	102	102	102	101	101	102	101	101	101	101	102	102	101	100	100	100	100
10	102	101	103	101	102	102	103	101		10	102	102	102	102	102	101	101	101	101	101	102	102	102	102	102	100	100	100	100	100	102	103	102	102	102	101	101	102	101	101	101	101	102	102	101	100	100	100	100
11	102	102	103	101	102	102	103	101		11	103	102	103	102	102	101	101	101	101	101	102	102	102	102	102	100	100	100	100	100	102	103	102	102	102	101	101	102	101	101	102	101	102	103	101	100	100	100	100
12	103	102	103	101	102	102	103	101		12	103	103	103	103	103	101	101	101	101	101	103	103	102	102	102	100	100	100	100	100	102	103	102	102	103	101	102	102	101	102	102	101	102	103	102	100	100	100	100
13	103	103	104	100	102	102	103	101		13	103	103	103	103	103	101	101	102	102	101	104	103	103	102	102	100	100	100	100	100	102	103	102	103	103	101	102	102	101	102	102	101	102	103	102	100	100	100	100
14	103	103	104	100	103	103	103	101		14	103	103	103	103	103	101	101	102	102	102	104	103	103	102	103	100	100	100	100	100	103	103	103	103	103	101	102	102	102	102	102	101	102	104	102	100	100	100	100
15	103	104	104	100	103	103	104	101		15	103	103	103	103	103	102	102	103	103	102	104	103	103	102	103	100	100	100	100	100	103	103	103	103	103	101	102	102	102	102	103	101	103	104	102	100	100	100	100
16	103	103	104	100	103	103	105	101		16	103	103	103	103	103	102	102	103	103	102	104	103	103	102	103	100	100	100	100	100	103	104	103	103	103	102	102	102	102	102	103	101	102	104	102	100	100	100	100
17	103	104	104	100	103	103	106	101		17	103	103	103	103	103	102	102	104	104	103	104	103	103	102	103	100	100	100	100	100	103	104	103	103	103	102	102	102	102	102	103	102	103	105	103	100	100	100	100
18	104	105	105	100	103	104	106	101		18	103	103	103	103	103	103	104	105	105	104	104	104	104	103	103	100	100	100	100	100	104	104	104	104	104	102	102	102	102	102	104	102	103	105	103	100	100	100	100
19	104	105	105	101	103	104	107	101		19	104	104	103	104	103	104	105	106	105	104	104	104	104	103	103	100	100	100	100	100	104	105	104	104	104	103	103	102	102	103	105	103	104	106	104	100	100	100	100
20	105	105	105	101	104	104	107	101		20	104	104	104	104	104	105	105	107	106	105	105	104	104	103	104	100	100	100	100	100	104	105	104	104	104	103	103	103	102	103	105	104	104	106	104	100	100	100	100
21	106	105	105	101	104	104	107	101		21	104	105	105	105	104	105	105	107	106	105	105	104	104	103	104	100	100	100	99	100	104	105	104	104	104	103	103	103	102	103	105	104	105	106	104	100	100	100	100
22	106	105	106	101	105	104	107	102		22	105	105	105	105	104	105	106	107	106	105	105	104	104	103	105	100	100	100	100	100	104	106	104	104	105	103	103	103	102	103	105	104	105	106	104	100	100	100	100
23	106	105	106	101	105	104	107	102		23	105	105	106	106	105	105	106	107	106	105	105	104	104	103	105	100	100	100	100	100	105	106	105	105	105	103	103	103	102	103	105	104	105	106	104	100	100	100	100
24	107	105	106	101	105	105	107	103		24	105	105	106	106	105	105	106	108	106	105	106	105	105	104	105	100	100	100	100	100	105	107	105	105	106	103	103	103	103	103	105	104	105	107	104	100	100	100	100
25	107	105	106	102	105	105	107	103		25	105	105	106	106	105	105	106	108	106	105	106	105	105	104	105	100	100	100	100	100	105	107	106	105	106	103	103	103	103	103	105	104	105	107	104	100	100	100	100
26	107	106	106	102	105	105	107	103		26	106	106	106	107	106	106	106	108	106	105	106	105	105	104	105	100	100	100	100	100	105	107	106	105	106	103	104	103	103	103	105	104	105	107	104	100	100	100	100
27	107	106	107	102	105	105	107	102		27	106	106	106	107	106	106	106	108	106	105	106	105	105	104	106	100	100	100	100	100	106	107	106	105	107	103	104	103	103	104	105	104	105	107	104	101	100	101	100
28	107	106	107	102	106	105	107	102		28	106	107	107	107	107	106	106	109	107	106	106	105	105	105	106	100	100	100	100	100	106	107	107	106	107	103	104	103	103	104	105	104	105	107	104	101	101	101	100
29	107	106	107	102	106	105	107	102		29	106	107	107	107	107	106	107	109	107	106	106	105	106	105	106	100	100	100	100	100	106	107	107	106	107	104	104	104	103	104	105	104	105	107	104	101	101	101	100
30	107	107	107	102	106	106	108	102		30	106	107	107	107	107	106	107	109	107	106	106	105	106	105	106	100	100	100	100	100	107	108	108	106	107	104	105	104	103	104	106	104	105	107	104	102	101	101	101
31	108	107	107	102	106	106	108	102		31	106	107	107	107	107	106	107	109	107	106	106	105	106	105	106	100	100	100	100	100	107	108	108	106	107	104	105	104	103	104	105	104	105	107	104	102	101	101	101
32	108	107	107	102	107	106	108	102		32	106	107	107	107	107	106	107	109	107	106	106	105	106	105	106	100	100	100	100	100	107	108	108	106	107	104	105	104	103	105	106	104	106	107	104	102	101	101	101
33	108	107	107	103	107	107	108	102		33	107	107	107	108	107	107	107	109	107	107	106	105	106	105	106	100	100	100	100	100	107	108	108	106	107	104	105	104	103	105	106	104	105	107	104	102	101	101	101
34	108	107	107	103	107	107	108	102		34	107	107	107	108	107	107	108	110	108	107	107	105	106	105	106	100	100	100	100	100	107	108	108	106	108	104	105	104	104	105	106	104	105	107	104	102	101	101	101
35	108	107	108	103	107	107	109	102		35	107	107	107	108	107	107	108	110	108	107	107	105	106	105	106	100	100	100	100	100	107	108	108	106	108	105	105	104	104	105	106	105	106	108	105	102	101	101	101
36	109	107	108	103	107	107	109	103		36	107	107	107	108	107	107	108	110	108	107	107	105	106	105	107	100	100	100	100	100	107	108	108	106	108	105	105	104	104	105	106	105	106	108	105	102	101	101	101
37	110	108	108	103	107	107	109	103		37	107	108	107	108	107	107	108	110	108	107	107	105	106	106	107	100	100	100	100	100	107	108	108	106	108	105	105	104	104	105	106	105	106	108	105	102	101	101	101
38	110	108	108	103	108	108	110	103		38	108	109	108	109	108	107	108	110	108	107	108	106	107	106	108	100	100	100	100	100	107	108	108	106	108	105	106	104	104	106	106	105	106	108	105	102	101	101	101
39	110	108	108	104	108	109	110	103		39	108	110	108	110	109	108	108	110	108	108	108	106	107	106	108	100	100	100	100	100	107	108	109	107	108	105	105	104	104	106	106	105	106	108	105	102	101	101	101
40	111	108	109	104	108	109	111	103		40	109	110	108	110	109	108	108	110	108	108	108	106	107	106	108	100	100	100	100	100	108	109	109	107	108	106	106	105	105	107	107	105	106	108	105	102	102	101	101
41	111	108	109	104	108	110	111	103		41	109	110	109	111	109	108	108	111	108	108	108	106	107	106	108	100	100	100	100	100	109	109	109	108	109	107	107	106	106	107	107	106	106	108	106	102	102	101	101
42	111	108	110	104	109	110	111	103		42	109	110	109	111	109	108	108	111	108	108	108	107	108	107	108	100	100	100	100	100	109	109	109	108	109	107	107	106	106	108	108	107	107	108	107	102	102	101	101
43	111	108	110	104	109	110	111	103		43	109	110	109	111	109	108	108	111	108	108	108	107	108	107	108	100	100	100	100	100	109	109	109	108	109	107	107	106	107	108	108	107	107	108	107	102	102	101	101
44	111	109	111	104	109	111	111	103		44	109	111	110	111	109	108	108	111	109	109	109	108	108	107	109	100	100	100	100	100	109	110	110	108	109	108	108	107	107	108	108	107	107	109	107	102	102	101	101
45	112	109	111	104	109	111	111	103		45	110	111	110	111	110	108	108	111	109	109	109	108	108	108	109	100	100	100	100	100	109	110	110	109	110	108	108	107	107	108	108	108	107	109	107	102	102	101	101
46	113	109	111	104	109	111	112	103		46	111	112	110	111	110	109	109	112	110	109	110	108	109	109	110	100	100	100	100	100	109	110	110	109	110	108	108	107	107	109	108	107	107	109	107	101	102	101	101
47	113	109	111	104	109	111	112	103		47	111	112	111	112	110	109	109	112	110	109	110	108	109	109	110	100	100	100	100	100	109	110	110	109	110	109	108	107	107	109	108	107	107	109	107	101	102	101	101
48	114	109	111	104	109	111	112	103		48	112	112	111	112	110	109	109	112	110	109	110	108	109	109	110	100	100	100	100	100	110	111	111	109	110	109	109	108	108	109	108	108	107	109	107	102	102	101	101
49	114	110	111	104	111	112	112	103		49	112	113	111	113	111	109	109	112	110	109	110	108	109	109	110	100	100	100	100	100	110	111	111	109	110	109	109	108	108	109	108	108	107	109	107	102	102	101	101
50	114	110	112	104	111	112	113	103		50	113	113	112	114	111	109	109	112	110	110	110	109	109	109	110	100	100	100	100	100	110	111	111	109	110	109	109	108	108	109	108	108	107	109	107	102	102	101	101
51	115	110	112	104	111	112	113	103		51	114	114	112	114	112	110	109	112	110	110	110	109	109	109	110	100	100	100	100	100	111	112	111	110	111	109	110	108	109	110	108	108	107	109	107	102	102	101	101
52	115	111	112	104	112	112	113	103		52	114	114	112	114	112	110	109	112	110	110	110	109	109	109	111	100	100	100	100	100	111	112	111	110	111	111	110	109	109	111	108	108	108	110	107	102	102	101	101
53	116	111	112	104	112	112	114	104		53	114	114	112	114	112	110	110	113	110	110	110	110	110	109	111	100	100	100	100	100	111	113	112	111	111	110	110	109	109	111	109	108	108	110	108	102	102	101	101
54	116	112	113	104	112	113	114	104		54	115	114	113	114	113	110	110	113	110	111	110	110	110	109	111	100	100	100	100	100	111	114	112	111	112	110	110	109	109	111	109	108	108	110	108	102	102	101	101
55	116	112	113	104	113	114	114	104		55	115	115	113	114	113	111	110	115	111	112	110	110	110	109	112	100	100	100	100	100	111	114	112	112	112	110	110	109	109	111	109	108	109	110	108	102	102	101	101
56	117	112	113	104	113	114	114	104		56	115	115	114	115	114	112	111	115	111	112	111	110	111	109	112	100	100	100	100	100	111	114	113	112	112	111	110	109	109	111	109	108	109	110	108	102	102	101	101
57	117	112	113	104	114	115	114	104		57	115	115	114	115	114	112	111	115	111	112	111	110	111	110	112	100	100	100	100	100	112	114	113	112	113	112	111	110	110	112	109	108	109	110	108	102	102	101	101
58	117	113	113	104	115	115	114	104		58	116	116	114	116	114	112	111	115	111	112	111	110	111	110	112	100	100	100	100	100	112	114	114	113	113	112	112	111	110	113	109	109	109	110	108	102	102	101	101
59	118	113	113	104	115	115	114	104		59	116	116	114	116	114	112	111	115	111	112	111	111	111	110	112	100	100	100	100	100	113	115	114	113	113	113	112	111	111	113	109	109	109	110	108	102	102	101	101
60	118	113	114	104	115	116	114	104		60	116	116	115	116	114	112	111	115	112	113	111	111	111	110	112	100	100	100	100	100	113	116	115	114	114	113	113	112	111	114	109	109	109	110	108	102	102	101	101
61	118	114	114	104	116	118	115	104		61	117	116	115	116	114	112	111	115	112	113	111	111	111	110	112	100	100	100	100	100	114	116	115	114	114	113	113	112	111	114	109	109	109	110	108	102	102	101	101
62	119	114	114	104	117	118	115	104		62	117	116	115	116	114	112	111	115	112	113	111	111	111	110	112	100	100	100	100	100	114	116	115	114	115	114	114	113	112	115	109	109	109	110	108	102	102	101	101
63	119	115	114	104	117	118	115	104		63	117	116	115	117	115	114	112	116	113	114	111	111	111	110	112	100	100	100	100	100	115	117	116	115	115	115	115	114	113	116	109	109	110	110	109	102	102	101	101
64	120	116	114	104	117	119	115	104		64	117	117	116	117	115	114	112	117	113	114	111	111	111	110	112	100	100	100	100	100	115	117	116	115	116	116	115	114	113	116	109	109	110	111	109	102	102	101	101
65	120	116	114	104	118	119	115	105		65	118	117	116	117	115	115	114	117	114	115	111	111	111	110	112	100	100	100	100	100	115	117	116	115	116	116	116	115	114	116	109	109	110	111	109	102	102	101	101
66	120	117	114	104	119	119	116	105		66	118	118	116	117	116	115	115	119	114	116	111	111	111	110	112	100	100	100	100	100	115	117	117	116	117	117	116	115	114	117	109	109	110	111	109	102	102	101	101
67	121	117	114	104	119	120	116	105		67	118	118	116	117	116	115	115	119	114	117	111	111	111	110	112	100	100	100	100	100	115	117	117	116	117	117	117	117	115	118	110	110	110	111	109	102	102	101	102
68	122	117	114	104	119	120	117	105		68	119	119	117	118	116	116	115	119	115	117	111	111	112	111	112	100	100	100	100	100	116	118	118	117	118	117	117	117	115	118	110	110	111	111	109	102	102	101	102
69	122	117	114	104	120	121	117	105		69	119	120	118	118	117	116	116	120	115	117	112	111	112	111	113	100	100	100	100	100	116	118	118	117	118	117	117	117	116	118	110	110	111	111	110	102	102	101	102
70	122	118	114	105	120	122	117	105		70	120	121	118	120	118	116	116	120	115	117	112	111	112	111	113	100	100	100	100	100	116	118	118	117	118	117	117	117	116	118	110	110	111	112	111	102	102	101	102
71	122	118	114	105	120	122	117	105		71	120	121	118	120	118	116	116	120	116	117	112	111	112	111	113	100	100	100	100	100	116	119	118	117	118	118	119	118	116	119	111	110	111	112	111	102	102	101	102
72	123	118	115	105	121	122	118	105		72	120	121	118	120	118	116	117	120	116	118	112	111	112	111	113	100	100	100	100	100	116	119	118	118	119	119	119	119	117	119	111	110	111	112	112	102	102	101	102
73	124	118	115	105	121	123	118	105		73	120	121	118	120	118	116	117	120	116	118	112	111	112	111	113	100	100	100	100	100	116	119	118	118	119	120	120	120	118	120	111	110	111	112	112	102	102	101	102
74	124	119	115	105	122	123	118	105		74	121	121	119	120	119	117	117	121	116	118	112	112	112	111	113	100	100	100	100	100	117	119	119	118	119	120	120	120	118	120	111	111	112	112	112	102	102	101	102
75	124	120	115	105	122	124	118	105		75	122	121	120	121	119	117	117	121	117	118	112	112	112	111	113	100	100	100	100	100	117	120	119	119	119	120	120	120	118	120	111	111	112	112	112	102	102	101	102
76	125	121	116	105	122	124	119	105		76	122	121	121	121	120	117	118	121	118	119	112	112	112	111	113	100	100	100	100	100	117	120	119	119	120	120	120	120	118	120	111	111	112	112	112	102	102	101	102
77	125	121	116	105	122	125	119	105		77	122	121	121	121	120	118	119	122	119	120	113	112	113	112	113	100	100	100	100	100	117	121	120	120	121	120	120	121	118	120	112	111	112	113	112	102	102	101	102
78	125	121	117	105	123	125	119	105		78	122	122	121	121	120	120	120	122	119	120	113	112	113	112	114	100	100	100	100	100	117	121	120	120	120	121	121	122	119	121	112	111	112	113	113	102	102	101	102
79	125	121	117	105	123	126	119	105		79	122	122	121	121	120	120	120	122	119	120	113	112	113	112	114	100	100	100	100	100	118	121	120	120	121	122	122	122	120	121	112	111	112	113	113	102	102	101	102
80	125	121	117	105	122	127	119	105		80	122	122	121	121	120	120	120	123	119	120	114	113	114	113	115	100	100	100	100	100	118	121	120	120	121	122	122	123	121	122	112	111	113	113	113	102	102	101	102
81	125	122	118	105	122	128	119	105		81	122	122	121	121	120	120	120	123	119	121	114	113	114	114	115	100	100	100	100	100	118	121	120	120	121	123	123	123	121	123	112	111	113	113	113	102	102	101	102
82	125	122	119	105	123	128	119	105		82	122	122	122	121	120	120	120	123	119	121	114	113	114	114	116	100	100	100	100	100	118	121	120	121	122	123	123	123	122	123	113	111	113	114	114	102	102	101	102
83	126	123	119	105	123	128	119	105		83	123	122	122	122	121	121	120	123	120	121	115	114	114	114	116	100	100	100	100	100	118	122	121	121	122	124	124	125	123	124	113	111	113	114	114	102	102	101	102
84	126	123	119	105	123	128	119	106		84	123	122	122	122	121	121	120	124	120	122	115	115	115	115	117	100	100	100	100	100	118	122	121	121	122	124	124	125	123	124	113	111	113	114	114	102	102	101	102
85	126	124	120	105	124	129	120	105		85	123	123	123	122	121	122	121	124	121	122	116	115	116	115	117	100	100	100	100	100	119	122	121	121	122	124	124	125	123	124	113	111	113	114	114	102	102	101	101
86	126	124	120	105	124	129	120	105		86	123	123	123	122	122	122	121	125	121	122	116	115	116	115	117	100	100	100	100	100	119	123	123	122	123	124	124	125	123	124	113	112	113	114	114	102	102	101	101
87	127	125	120	105	125	129	120	105		87	124	123	123	122	122	122	121	126	122	122	117	116	116	116	117	100	100	100	100	100	119	123	123	122	123	125	125	125	123	124	113	112	114	114	114	102	102	102	102
88	128	125	120	105	125	129	120	105		88	124	123	123	122	122	123	122	126	122	123	117	116	116	116	117	100	100	100	100	100	119	123	123	122	123	125	125	125	123	124	113	112	114	114	114	102	102	102	102
89	128	125	120	105	126	130	120	105		89	124	124	123	123	122	123	122	127	123	123	117	116	116	116	117	100	100	100	100	100	119	123	123	123	123	125	125	125	123	125	113	112	114	114	114	102	102	102	102
90	128	126	121	105	126	130	120	105		90	125	124	124	123	123	124	123	127	124	124	117	116	116	116	117	100	100	100	100	100	120	124	124	124	124	125	125	125	124	125	113	112	114	115	115	102	102	102	102
91	128	126	121	105	126	131	120	105		91	125	124	124	123	123	124	123	128	124	124	118	116	117	116	118	100	100	100	100	100	120	125	124	124	124	125	125	125	124	125	114	113	115	115	115	102	102	102	102
92	128	127	121	105	127	131	120	105		92	125	124	124	123	123	124	123	128	125	124	118	117	117	116	118	100	100	100	100	100	121	125	124	124	124	125	125	125	124	125	114	113	115	115	115	102	102	102	102
93	128	128	121	105	127	132	120	105		93	126	125	125	124	123	124	123	128	125	124	118	117	117	116	118	100	100	100	100	100	121	125	125	125	125	127	126	127	125	126	114	113	115	115	115	102	102	102	102
94	128	128	121	105	127	132	120	105		94	126	125	125	124	123	125	124	128	126	125	118	117	117	116	118	100	100	100	100	100	122	125	125	125	125	127	126	128	125	127	114	113	115	116	115	102	102	102	102
95	129	128	121	105	127	132	120	105		95	127	126	126	124	124	126	124	129	126	125	118	117	117	117	119	100	100	100	100	100	122	125	125	125	125	127	126	128	126	127	114	113	115	116	115	102	102	102	102
96	129	129	121	105	127	133	120	105		96	127	126	126	125	124	126	125	129	127	126	118	117	118	117	119	100	100	100	100	100	122	125	125	126	125	128	127	128	126	127	114	113	115	116	115	102	102	102	102
97	130	131	122	105	128	133	120	106		97	127	127	126	125	124	127	125	130	127	126	118	117	118	117	119	100	100	100	100	100	122	126	126	126	126	128	127	129	126	128	114	113	115	115	115	103	102	102	102
98	130	131	122	105	128	134	120	106		98	128	127	127	125	124	127	126	131	128	127	119	117	118	117	119	100	100	100	100	100	122	126	127	126	126	129	127	129	127	128	114	113	116	116	115	103	102	102	102
99	131	132	122	105	128	134	120	106		99	128	127	127	126	125	129	126	132	129	128	119	118	118	118	119	100	100	100	100	100	122	127	127	127	127	129	127	129	127	128	114	113	116	116	115	103	102	102	102
100	131	132	122	105	128	134	120	106		100	128	128	128	126	125	129	127	133	129	128	119	118	118	118	119	100	100	100	100	100	123	128	128	128	127	129	128	130	127	129	114	113	116	116	115	103	102	102	102
101	131	133	123	105	128	135	121	106		101	128	128	128	126	126	129	128	133	129	129	119	118	119	118	120	100	100	100	100	100	123	128	128	128	127	129	128	130	127	129	115	114	116	116	116	103	102	102	102
102	131	133	123	105	129	136	121	106		102	128	128	128	126	126	129	128	133	130	129	119	118	119	118	120	100	100	100	100	100	123	129	128	128	127	130	128	130	128	129	115	114	116	116	116	103	102	102	102
103	131	133	123	105	130	136	121	105		103	129	129	129	127	126	129	129	133	130	129	120	118	119	119	121	100	100	100	100	100	124	129	129	129	128	130	128	130	128	129	115	114	116	116	116	103	102	102	102
104	132	134	124	105	130	137	121	106		104	129	129	129	127	126	130	129	133	131	129	120	119	119	119	121	100	100	100	100	100	124	129	129	129	129	130	129	131	129	130	115	114	116	116	116	102	102	102	102
105	132	135	124	105	131	137	121	106		105	129	130	130	127	127	130	129	133	131	129	120	119	119	119	121	100	100	100	100	100	125	129	130	130	129	131	129	131	129	130	115	114	117	117	116	103	103	103	102
106	133	135	124	105	131	137	121	106		106	130	131	130	128	127	131	130	134	132	130	121	119	120	119	121	100	100	100	100	100	125	130	130	130	129	131	130	131	129	130	115	114	117	117	116	103	103	103	102
107	134	136	125	105	131	138	121	106		107	130	131	130	128	127	132	131	135	133	131	121	119	120	119	121	100	100	100	100	100	126	130	131	130	130	131	131	131	130	130	115	114	117	117	116	103	103	103	102
108	134	137	126	105	132	138	121	106		108	130	131	131	129	128	132	131	135	133	131	121	119	120	119	121	100	100	100	100	100	126	131	131	130	130	131	130	131	130	130	115	114	117	116	116	102	103	103	102
109	134	137	126	105	132	138	121	106		109	131	132	131	130	128	132	132	136	134	132	123	120	122	120	123	100	100	100	100	100	126	131	131	130	130	132	131	131	130	131	115	114	117	117	116	103	103	103	102
110	134	139	126	105	133	138	122	107		110	131	132	131	130	128	132	132	136	134	132	123	120	122	121	123	100	100	100	100	100	126	132	131	131	131	132	131	132	130	131	115	114	116	117	116	103	103	103	102
111	134	139	126	105	133	138	122	107		111	131	132	131	130	128	132	132	137	135	132	124	121	123	121	124	100	100	100	100	100	127	132	132	131	131	132	131	132	130	131	115	114	116	117	116	103	103	103	102
112	134	140	127	105	134	139	122	107		112	131	132	131	130	128	134	134	138	137	133	124	121	123	121	124	100	100	100	100	100	128	132	132	132	131	132	131	132	130	131	115	114	117	117	116	103	103	103	102
113	134	140	127	105	134	140	122	107		113	131	132	131	130	128	134	134	139	137	134	124	121	123	121	124	100	100	100	100	100	128	132	132	132	132	132	131	132	130	131	116	115	117	118	117	103	103	103	102
114	134	140	127	105	135	140	122	107		114	131	132	131	130	128	134	135	139	138	134	124	121	123	121	124	100	100	100	100	100	129	133	133	133	132	133	131	132	131	131	115	115	117	118	117	103	103	102	102
115	135	141	127	105	135	140	122	107		115	131	132	132	131	129	135	136	140	138	134	124	121	123	121	124	100	100	100	100	100	129	133	133	133	132	133	132	132	131	131	115	115	117	118	117	103	103	102	102
116	135	141	127	105	136	141	122	107		116	131	132	132	131	129	135	136	140	139	135	124	121	123	121	124	100	100	100	100	100	129	134	134	134	132	133	132	133	132	131	115	115	117	118	117	103	103	102	102
117	136	142	128	105	137	142	122	107		117	132	132	133	131	129	136	136	140	139	136	124	121	123	121	124	100	100	100	100	100	130	134	135	134	133	133	132	133	131	131	115	115	117	118	117	103	103	102	102
118	137	142	128	105	137	142	122	108		118	131	132	133	131	129	136	136	140	139	136	125	121	123	122	125	100	100	100	100	100	131	135	136	135	133	134	132	133	132	131	116	115	118	118	117	103	103	102	102
119	138	142	128	105	137	142	123	108		119	133	133	134	133	130	136	137	141	140	137	125	122	123	123	125	100	100	100	100	100	132	135	137	136	134	134	133	133	132	132	117	116	119	118	118	103	103	102	102
120	139	143	128	105	137	142	123	108		120	133	133	135	133	130	137	137	142	140	137	125	122	124	123	126	100	100	100	100	100	133	136	137	136	135	134	133	133	133	132	117	116	120	118	118	103	103	102	102
121	139	144	129	105	139	142	123	108		121	135	135	136	134	132	137	138	142	141	138	125	122	124	123	126	100	100	100	100	100	133	137	138	137	135	134	133	133	133	132	117	116	120	119	118	103	103	102	102
122	140	145	129	106	139	142	124	108		122	135	135	136	134	133	138	138	143	141	138	126	122	124	123	126	100	100	100	100	100	133	137	138	136	135	134	133	133	133	132	117	116	120	119	118	103	103	102	102
123	140	146	129	106	140	143	124	108		123	135	136	136	135	133	138	139	143	142	139	126	123	124	124	126	100	100	100	100	100	134	137	139	137	136	135	133	133	133	132	118	117	121	119	118	103	103	102	102
124	141	148	130	106	140	143	124	108		124	135	136	137	135	133	139	140	144	143	140	126	123	124	124	126	100	100	100	100	100	134	137	138	137	136	135	133	134	134	132	118	117	121	119	119	103	103	102	102
125	141	149	130	106	140	144	124	108		125	136	137	137	135	133	139	141	145	144	141	126	123	124	124	127	100	100	100	100	100	135	139	139	138	137	135	133	134	134	132	118	117	121	119	119	103	103	102	102
126	142	149	130	106	140	145	125	108		126	136	137	138	135	135	141	144	147	144	143	127	123	125	124	127	100	100	100	100	100	136	139	140	139	137	135	134	134	134	132	118	117	121	119	119	103	103	102	102
127	142	150	131	105	141	145	125	108		127	137	137	138	136	135	141	144	147	145	143	127	123	125	124	127	100	100	100	100	100	136	139	140	139	137	136	134	134	135	133	118	117	121	119	119	103	103	103	102
128	143	151	131	106	141	146	125	108		128	137	138	138	137	136	141	144	147	145	143	127	124	125	124	127	100	100	100	99	100	137	140	141	140	138	137	135	135	136	135	118	118	121	120	120	103	103	103	102
129	144	151	131	106	142	146	125	108		129	138	138	138	137	136	142	144	148	145	144	127	124	125	124	128	100	100	100	100	100	138	140	141	140	139	137	135	135	136	135	118	118	121	120	120	103	103	103	102
130	145	152	131	106	142	147	125	108		130	138	139	139	138	137	142	145	149	146	145	127	124	125	124	128	100	101	100	100	100	139	140	142	140	140	138	135	136	137	135	118	118	121	120	120	103	103	103	102
131	146	154	131	106	142	147	125	108		131	138	139	140	138	137	143	147	150	147	146	128	124	125	125	128	100	101	100	100	100	139	141	142	140	140	139	136	136	137	136	118	118	121	120	120	103	103	103	102
132	147	155	131	106	143	147	125	108		132	139	140	140	140	138	144	147	150	147	147	128	125	126	125	128	100	101	100	100	100	139	142	142	141	140	140	137	137	138	137	118	118	122	120	120	103	103	103	102
133	148	156	132	106	144	147	126	108		133	140	141	141	140	139	146	149	152	148	149	128	125	126	125	128	100	101	100	100	100	141	142	143	141	141	139	137	137	138	137	118	118	122	120	120	103	103	103	102
134	148	156	132	106	145	148	126	109		134	141	141	142	141	140	147	150	154	149	151	128	125	126	125	128	100	101	100	100	100	141	142	143	142	141	139	137	137	138	137	118	118	122	120	120	103	103	103	102
135	149	157	132	106	146	148	128	109		135	141	142	143	142	141	148	151	154	150	151	129	125	126	126	129	100	101	100	100	100	141	143	144	142	142	140	137	137	139	137	119	118	122	120	120	103	103	103	102
136	149	157	133	106	146	149	128	109		136	142	142	143	142	141	148	151	155	150	151	129	125	126	126	129	100	101	100	100	100	141	144	145	143	143	140	139	138	140	138	119	118	122	120	121	103	103	103	102
137	149	158	133	106	146	149	128	108		137	142	143	143	142	142	148	152	156	150	152	129	125	126	126	129	100	101	100	100	100	142	144	146	143	143	140	139	138	140	138	120	119	123	121	121	103	103	103	102
138	150	158	134	106	147	149	128	108		138	142	143	143	142	142	148	152	157	151	152	129	125	127	127	129	100	101	100	100	100	143	144	147	144	144	140	139	139	141	139	120	119	123	121	121	103	103	103	102
139	150	160	134	106	147	149	128	109		139	142	143	144	143	142	149	153	157	151	153	130	125	127	127	130	100	101	100	100	100	144	144	147	145	145	140	139	139	141	139	120	119	123	121	121	103	103	103	102
140	151	160	135	106	148	150	128	109		140	143	143	144	143	142	149	153	158	152	153	130	126	127	127	130	100	101	100	100	100	144	144	147	145	145	140	139	139	141	139	120	119	123	121	121	103	103	103	102
141	151	162	135	106	148	150	129	109		141	143	143	144	144	142	150	155	158	152	154	130	126	128	127	130	100	101	100	100	100	144	144	147	145	145	140	140	139	141	139	120	119	123	121	121	103	103	103	102
142	152	163	135	106	148	150	129	109		142	143	144	145	144	143	151	155	159	153	155	131	126	129	127	131	100	101	100	100	100	145	146	148	146	145	141	140	139	141	140	120	119	123	121	121	103	103	103	102
143	152	163	136	106	149	150	129	109		143	144	144	145	144	143	153	157	160	155	156	132	127	129	128	131	100	101	100	100	100	145	146	149	146	145	141	140	139	141	140	121	120	123	121	122	103	103	103	102
144	153	164	136	106	150	150	129	109		144	144	145	145	144	144	154	157	161	156	157	132	127	129	128	131	100	101	100	100	100	145	147	149	147	146	141	140	139	141	140	121	120	123	121	121	103	103	103	102
145	153	165	137	106	150	150	129	109		145	145	145	145	144	144	154	157	162	156	157	133	128	129	128	131	100	101	100	100	100	145	148	150	148	147	141	140	139	141	140	121	120	123	121	121	103	103	103	102
146	153	165	137	106	151	150	129	110		146	145	145	145	145	144	155	159	163	157	158	133	128	130	128	131	100	101	100	100	100	146	148	150	148	147	142	141	142	142	141	121	120	123	121	121	103	103	103	102
147	154	166	137	106	151	151	130	110		147	145	145	146	145	144	155	159	163	157	158	133	129	130	129	132	100	101	100	100	100	146	148	150	148	147	142	142	142	143	141	121	120	123	121	121	103	103	103	102
148	154	167	139	106	152	151	130	110		148	145	145	146	145	144	155	159	163	157	158	133	129	131	129	132	100	101	100	100	100	147	149	151	149	148	143	142	142	143	141	121	120	124	121	122	103	103	103	102
149	154	167	139	106	153	151	130	110		149	145	146	146	145	144	157	161	164	159	159	134	130	131	130	132	100	101	100	100	100	147	150	152	150	148	143	142	142	143	141	121	120	124	122	122	103	103	103	102
150	155	167	140	106	154	152	131	110		150	145	146	146	146	144	157	162	165	159	160	135	131	132	131	133	100	101	100	100	100	148	150	153	150	150	144	143	144	144	141	122	121	124	122	122	103	103	103	102
151	155	168	140	106	155	153	131	111		151	145	146	147	146	145	158	162	166	160	160	135	131	132	131	133	100	101	100	100	100	149	151	154	151	151	144	143	144	144	142	122	122	125	123	124	103	103	103	102
152	157	168	141	106	155	153	131	111		152	146	146	147	147	145	158	162	166	160	160	136	131	133	132	134	100	101	100	100	100	149	151	154	152	152	144	144	144	144	142	123	122	125	123	124	103	103	103	102
153	157	168	142	106	156	154	132	111		153	146	146	147	147	146	158	162	166	160	160	137	132	135	133	135	100	101	100	100	100	150	152	155	153	152	144	145	145	144	143	123	122	125	123	124	103	103	103	103
154	159	169	142	106	156	155	132	111		154	147	148	149	148	146	159	163	167	161	161	138	133	135	134	136	100	101	100	100	100	150	152	155	153	153	145	145	145	145	143	123	123	125	123	124	103	103	103	103
155	160	170	143	106	156	155	133	111		155	148	148	149	148	147	159	163	167	161	161	138	133	135	134	136	100	101	100	100	100	151	153	156	153	153	146	146	146	146	143	124	123	125	123	125	103	103	103	103
156	160	171	144	106	157	155	134	111		156	149	149	150	149	148	159	164	167	161	162	139	134	137	136	136	100	101	100	100	100	151	153	156	154	153	147	146	147	146	144	124	124	125	124	125	103	103	103	103
157	160	171	145	106	157	155	135	111		157	150	150	151	150	148	159	165	168	162	163	139	134	137	136	136	100	101	100	100	100	151	153	156	154	153	148	147	147	146	144	124	124	125	124	125	103	104	103	103
158	161	171	146	106	156	156	135	111		158	150	150	151	150	148	160	166	168	162	164	141	135	138	137	137	100	101	100	100	100	152	154	157	154	154	148	147	147	146	144	125	125	126	125	125	103	104	103	103
159	162	171	146	106	157	157	136	111		159	150	150	151	151	149	160	166	168	162	164	142	135	139	139	138	100	101	100	100	100	153	154	157	155	155	148	147	148	146	144	125	126	127	125	126	103	104	103	103
160	164	171	147	106	157	157	136	111		160	150	151	152	151	148	160	166	168	162	164	143	136	139	139	139	100	101	100	100	100	153	154	157	155	155	148	148	148	147	144	126	127	127	126	126	103	104	103	103
161	164	172	148	106	157	157	136	111		161	151	152	153	152	149	160	166	168	162	164	143	137	140	139	139	100	101	100	100	100	154	155	158	155	156	149	148	149	147	146	126	127	128	126	127	103	104	103	103
162	164	174	148	106	158	157	136	111		162	152	153	154	153	151	160	166	168	162	164	144	138	140	140	140	100	101	100	100	100	154	156	158	156	156	150	148	149	148	146	126	127	128	126	127	103	104	103	103
163	164	174	148	106	159	158	136	111		163	152	154	155	154	152	161	167	169	163	165	144	138	140	140	141	100	101	100	100	100	154	156	158	156	157	150	149	150	148	146	126	127	128	126	127	103	104	103	103
164	164	175	150	106	159	158	136	111		164	152	154	155	154	152	162	168	170	164	167	144	138	140	140	141	100	101	100	100	100	154	157	158	156	157	150	149	150	148	146	127	127	129	127	128	103	104	103	103
165	165	175	150	106	160	158	137	111		165	153	154	156	154	152	162	168	170	164	167	145	139	140	140	141	100	101	100	100	100	154	157	159	156	157	150	150	150	149	146	127	128	129	127	128	103	104	103	103
166	167	175	151	106	160	159	137	111		166	153	154	156	154	152	163	170	171	165	169	146	140	142	142	142	100	101	100	100	100	155	157	159	156	157	150	150	150	149	146	127	128	129	127	128	103	104	104	103
167	167	176	152	106	162	160	137	112		167	153	154	156	154	152	163	170	171	165	169	147	140	142	143	143	100	101	100	100	100	155	157	160	156	157	150	150	150	149	146	128	128	129	128	130	103	104	104	103
168	167	176	152	106	162	160	138	112		168	154	155	157	155	153	163	170	171	165	169	147	140	143	143	143	100	101	100	100	100	155	158	160	157	158	150	150	151	149	147	128	128	129	128	130	103	104	104	103
169	168	177	153	106	162	160	139	112		169	155	156	158	155	154	163	170	172	165	170	148	141	144	144	144	100	101	100	100	100	156	159	160	158	159	151	151	152	149	148	128	128	129	128	129	103	104	104	103
170	169	178	154	106	163	161	139	112		170	155	156	158	155	154	164	170	172	165	170	148	142	144	145	144	100	101	100	100	100	156	160	161	159	160	151	151	152	149	148	129	129	130	129	130	103	104	104	103
171	169	178	154	106	164	160	139	112		171	155	156	158	155	154	165	171	172	166	170	149	142	144	145	144	100	101	100	100	100	157	160	161	159	160	151	151	152	149	148	129	129	131	130	131	103	104	103	103
172	169	180	155	106	165	160	139	112		172	156	157	159	156	155	166	171	173	167	171	149	143	144	146	145	100	101	100	100	100	157	160	161	159	160	151	152	152	150	149	130	130	131	130	131	103	104	103	103
173	169	180	156	106	165	161	139	112		173	156	157	159	156	155	166	171	173	167	171	150	143	145	146	146	100	101	100	100	100	158	161	163	160	162	151	152	152	150	149	130	130	132	130	131	103	104	104	103
174	169	181	157	106	165	161	140	112		174	156	157	160	157	155	168	173	174	168	172	150	143	145	146	146	100	101	100	100	100	159	162	164	161	163	151	151	152	150	149	130	130	132	130	131	103	104	104	103
175	170	181	158	106	165	161	140	112		175	156	158	160	157	156	168	173	174	169	173	151	144	146	147	147	100	101	100	100	100	159	162	164	161	162	152	152	152	151	149	130	130	132	130	131	103	104	104	103
176	171	182	158	106	166	162	141	112		176	157	158	160	157	156	168	174	175	169	173	152	146	146	147	149	100	101	100	100	100	160	163	164	161	163	152	153	153	151	150	130	130	132	130	131	103	104	104	103
177	171	182	158	106	168	162	142	112		177	158	158	160	157	156	168	174	175	169	174	152	147	147	148	149	100	101	100	100	100	160	163	164	161	163	152	153	153	151	150	130	130	132	130	132	103	104	104	103
178	171	182	160	106	168	162	142	112		178	158	159	161	158	157	169	175	175	169	174	152	147	148	148	149	100	101	100	100	100	161	164	165	162	164	153	154	154	152	151	131	131	133	132	132	103	104	104	103
179	171	182	160	106	169	163	142	112		179	159	160	162	158	158	170	176	176	170	175	152	147	148	148	149	100	101	100	100	100	162	164	166	163	165	153	154	154	151	151	131	132	133	132	133	103	104	104	103
180	172	182	160	106	169	164	142	113		180	159	160	162	159	158	170	176	177	170	175	153	148	150	150	150	100	101	100	100	100	162	164	166	163	165	152	154	154	152	152	132	132	133	132	133	103	104	104	103
181	173	183	160	106	170	164	142	113		181	159	161	163	160	159	170	176	177	171	175	154	149	150	150	151	100	101	100	100	100	163	165	166	164	166	153	155	154	152	152	132	132	133	132	133	103	104	104	103
182	174	184	161	106	171	165	144	113		182	160	161	163	161	160	171	176	177	171	175	154	149	150	150	151	100	101	100	100	100	164	166	167	165	167	153	155	155	153	153	132	132	133	132	133	103	104	104	103
183	174	184	161	106	171	165	144	113		183	162	163	164	162	161	172	177	178	172	177	154	149	151	150	151	100	101	100	100	100	164	166	167	165	167	153	155	155	153	153	133	133	134	132	134	103	104	104	103
184	175	185	162	106	171	165	145	113		184	162	163	165	163	161	172	177	178	172	177	155	150	151	151	151	100	101	100	100	100	164	167	168	166	168	154	156	155	153	154	134	133	135	133	135	103	104	104	103
185	176	185	163	106	171	165	145	113		185	163	163	165	164	162	172	177	179	172	177	155	150	151	151	152	100	101	100	100	100	165	168	168	166	168	154	157	155	154	154	134	134	135	133	135	103	104	104	103
186	177	185	163	106	171	166	145	113		186	163	164	166	164	163	172	177	180	173	177	157	151	152	151	153	100	101	100	100	100	165	168	169	166	169	155	157	156	154	154	135	134	135	134	135	103	104	104	102
187	177	186	163	106	172	166	146	113		187	164	165	167	164	164	172	178	180	173	177	157	152	153	152	153	100	101	100	100	100	165	168	169	167	168	155	158	156	154	155	135	134	136	134	136	103	104	104	102
188	178	187	164	106	172	167	146	113		188	164	165	167	164	164	173	178	181	173	178	157	153	153	152	154	100	101	100	100	100	165	168	169	167	168	155	158	157	155	155	136	135	136	135	136	103	104	104	102
189	178	187	164	106	173	168	147	113		189	164	166	168	165	165	174	179	182	174	179	157	153	154	152	154	100	101	100	100	100	166	168	169	167	168	155	159	157	156	156	136	135	136	135	136	103	104	104	102
190	179	188	164	106	173	168	148	113		190	165	167	169	166	166	174	179	183	175	180	158	153	155	153	155	100	101	100	100	100	166	168	169	167	169	156	159	158	157	156	136	135	137	136	136	104	104	104	102
191	179	188	165	106	173	169	148	113		191	165	167	169	166	167	174	180	183	176	180	159	154	155	153	156	100	101	100	100	100	166	168	169	167	169	157	160	159	157	157	137	137	137	138	136	104	104	104	102
192	179	188	166	107	173	169	148	113		192	165	168	169	167	167	175	180	184	176	181	159	154	155	153	156	100	101	100	100	100	166	169	169	168	169	157	160	159	158	157	137	137	138	138	137	104	104	104	102
193	180	188	167	107	174	169	148	113		193	166	168	170	167	168	176	180	184	177	181	159	155	155	154	156	100	101	100	100	100	166	169	169	168	169	157	160	159	158	158	138	137	138	138	137	104	104	104	102
194	180	190	167	107	174	169	148	113		194	166	168	170	168	168	176	181	184	177	181	160	156	156	156	157	100	101	100	100	100	166	169	170	168	168	158	161	160	158	158	138	137	138	139	137	104	104	104	102
195	181	190	167	107	174	168	149	113		195	166	169	171	168	168	177	181	185	177	181	160	157	157	156	158	100	101	100	100	100	166	170	170	169	169	158	161	160	160	159	138	137	138	139	137	104	104	104	102
196	181	191	168	107	174	168	150	113		196	167	170	172	169	169	177	182	185	177	183	161	157	157	157	158	100	101	100	100	100	166	170	170	170	169	159	162	160	160	159	138	137	138	139	138	104	104	104	102
197	182	191	168	107	175	169	151	113		197	168	171	173	170	169	178	182	186	178	183	161	157	157	157	158	100	101	100	100	100	167	171	170	170	169	159	162	160	160	159	139	137	138	139	138	104	104	104	102
198	182	191	168	107	175	170	151	114		198	168	171	173	170	170	178	182	187	178	183	161	158	158	157	158	100	101	100	100	100	167	171	171	171	169	159	162	160	160	159	139	138	139	140	138	104	104	104	102
199	182	191	168	107	175	170	151	114		199	169	172	174	170	171	179	182	188	179	184	161	158	158	157	159	100	101	100	100	100	168	171	171	171	169	159	163	161	161	160	140	138	140	141	140	104	104	104	103
200	183	192	169	107	174	171	153	114		200	170	172	175	171	171	179	183	188	180	184	161	158	158	157	159	100	101	100	100	100	168	171	172	172	170	160	163	161	161	160	140	139	140	141	140	104	104	104	103
201	184	192	170	107	175	171	152	114		201	170	173	175	171	172	179	183	189	180	184	161	158	159	157	159	100	101	100	100	100	169	171	172	172	170	160	163	161	161	161	140	139	140	141	140	104	104	104	103
202	184	193	170	107	175	171	152	114		202	171	173	176	172	173	180	183	190	180	185	162	159	159	158	159	100	101	100	100	100	169	172	172	172	170	161	164	162	161	161	141	139	141	142	141	104	104	104	103
203	185	193	170	107	175	171	153	114		203	172	174	176	172	173	180	183	190	180	185	162	159	159	158	160	100	101	100	100	100	169	172	173	173	171	161	164	162	161	161	141	139	141	142	141	104	104	104	103
204	185	193	171	107	175	172	153	114		204	172	174	176	173	174	180	184	190	181	185	163	159	160	159	160	100	101	100	100	100	170	172	173	173	171	162	164	162	162	162	141	139	141	142	141	104	104	104	103
205	186	193	171	107	175	173	154	114		205	173	174	177	174	174	181	184	191	181	186	163	159	160	159	160	100	101	100	100	100	170	172	173	174	172	162	164	163	162	162	142	139	142	143	142	104	104	104	103
206	186	193	172	107	175	173	154	114		206	173	175	178	174	175	181	185	191	181	186	163	160	160	160	160	100	101	100	100	100	170	172	174	175	172	162	164	163	162	163	142	139	142	143	142	104	104	104	103
207	187	194	172	107	176	173	154	113		207	174	175	178	175	176	181	185	191	182	187	164	160	160	160	161	100	101	100	100	100	171	172	175	175	172	162	164	163	162	163	142	139	143	143	143	104	104	104	103
208	187	194	173	107	177	174	155	114		208	175	176	179	176	176	181	185	192	182	187	165	161	161	160	162	100	101	100	100	100	171	173	175	176	173	163	164	163	162	163	142	139	143	144	143	104	104	104	103
209	188	194	174	107	177	174	155	114		209	175	177	179	176	176	182	186	192	183	188	165	161	161	161	162	100	101	100	100	100	171	173	175	176	173	163	165	164	162	164	143	140	143	144	143	104	105	105	103
210	188	194	174	107	177	174	155	114		210	176	178	180	176	176	182	186	193	183	189	165	161	161	161	162	100	101	100	100	100	172	173	176	177	173	164	166	164	163	164	143	140	144	145	144	104	105	105	103
211	188	194	175	107	177	174	156	114		211	176	178	180	176	177	183	187	193	184	189	166	162	161	162	163	100	101	100	100	100	173	174	176	177	173	164	166	165	163	164	143	140	144	145	144	104	105	105	103
212	188	194	175	107	177	174	156	114		212	177	178	180	177	177	183	188	194	184	189	166	162	161	162	163	100	101	100	100	100	173	175	177	178	174	164	167	165	163	165	143	141	144	146	144	104	105	105	103
213	188	195	176	107	178	175	157	114		213	177	179	180	177	177	183	188	194	184	190	166	163	162	162	164	100	101	100	100	100	174	175	177	178	175	164	167	165	163	165	144	142	145	146	145	104	105	105	103
214	189	196	177	107	179	175	157	114		214	177	180	181	178	177	184	188	194	185	190	167	164	162	163	165	100	101	100	100	100	174	176	178	179	175	165	168	165	164	166	144	142	145	146	145	104	105	104	103
215	189	197	177	107	179	176	158	114		215	178	180	181	178	178	184	189	195	186	191	167	164	163	163	165	100	101	100	100	100	176	176	178	179	176	165	168	166	165	166	144	142	145	146	145	104	105	105	103
216	190	197	177	107	179	176	158	114		216	178	181	182	178	178	185	190	195	187	191	167	165	163	164	166	100	101	100	100	100	176	177	179	180	176	165	168	166	165	166	144	142	145	147	145	104	105	105	103
217	191	197	177	107	180	176	159	115		217	179	181	183	179	179	185	190	196	187	192	167	165	164	164	166	100	101	100	100	100	177	178	180	181	177	166	169	167	166	166	145	143	145	148	146	104	105	105	103
218	191	197	177	108	180	177	159	115		218	179	182	184	179	179	185	190	196	187	192	168	166	164	165	166	100	101	100	100	100	178	178	180	181	177	166	169	167	166	167	146	143	146	148	146	104	105	105	103
219	191	197	178	108	180	177	159	115		219	181	183	185	180	181	185	191	197	188	192	168	167	165	165	167	100	101	100	100	100	178	178	181	182	177	166	170	168	167	168	146	143	146	148	146	104	105	105	103
220	192	198	178	108	180	178	159	115		220	181	183	186	180	181	186	191	197	188	192	169	167	165	166	167	100	101	100	100	100	178	178	181	182	177	166	171	168	167	168	146	144	146	149	147	104	105	105	103
221	193	198	178	108	181	178	160	115		221	181	184	186	181	181	186	191	198	188	193	169	167	166	166	167	100	101	100	100	100	178	179	181	183	178	167	172	168	167	169	146	144	146	149	147	105	105	105	103
222	194	198	178	108	181	178	160	115		222	182	184	187	181	182	186	191	198	189	193	169	167	166	166	167	100	101	100	100	100	178	180	182	183	179	167	172	169	168	169	146	144	147	149	148	105	105	105	103
223	194	199	179	108	181	179	161	116		223	183	185	187	182	182	187	192	199	189	194	170	168	166	167	167	100	101	100	100	100	179	180	182	184	179	168	173	169	168	169	146	145	147	149	148	105	105	105	103
224	195	199	179	108	182	179	161	116		224	184	186	188	183	182	187	192	199	190	194	170	168	167	167	168	100	101	100	100	100	179	180	182	184	179	168	173	169	169	170	146	145	147	149	148	105	105	105	103
225	196	200	179	108	182	179	162	116		225	184	187	188	183	183	188	193	200	190	194	170	168	167	167	169	100	101	100	100	100	179	180	183	184	180	168	173	170	169	170	147	145	147	149	148	105	105	105	103
226	197	200	180	108	182	180	162	116		226	185	187	189	184	183	188	193	200	190	194	170	168	168	167	169	100	101	100	100	100	180	181	182	184	180	169	174	171	169	171	147	145	147	150	149	105	105	105	103
227	197	201	181	108	182	180	162	116		227	185	188	190	185	184	189	193	200	190	194	170	168	168	167	169	100	101	100	100	100	180	181	183	185	181	169	174	171	170	172	147	145	148	150	149	105	105	105	103
228	198	201	182	108	182	180	163	116		228	186	189	191	186	186	190	194	201	191	194	171	169	169	168	169	100	101	100	100	100	181	181	183	185	181	170	174	172	170	172	147	146	148	151	150	105	105	105	103
229	199	202	182	108	183	180	163	116		229	187	190	192	187	186	190	194	202	191	195	172	169	169	168	170	100	101	100	100	100	181	182	183	185	182	170	174	172	170	173	148	146	148	151	150	105	105	105	103
230	200	203	182	108	183	180	163	117		230	188	190	192	188	186	191	194	202	192	195	173	170	170	169	170	100	101	100	100	100	182	182	183	186	182	170	175	172	171	173	149	146	149	151	151	105	105	105	103
231	200	203	183	108	183	181	164	117		231	188	191	192	188	187	191	195	203	192	195	173	170	170	169	170	100	101	100	100	100	182	183	184	186	183	170	176	173	171	173	149	146	149	151	151	105	105	105	103
232	201	204	183	108	184	181	164	117		232	188	191	193	189	187	192	195	203	193	197	174	170	170	169	170	100	101	100	100	100	182	184	184	186	184	171	176	173	171	174	149	146	150	152	151	105	105	105	103
233	202	205	184	108	184	182	165	117		233	189	191	193	189	188	192	196	204	193	197	174	171	171	170	171	100	101	100	100	100	182	184	185	187	184	171	176	174	172	174	149	146	150	152	151	105	105	106	103
234	202	205	185	108	184	182	165	117		234	189	192	194	190	189	193	197	204	194	198	175	172	171	171	172	100	101	100	100	100	183	184	185	187	185	172	177	174	172	174	150	147	151	153	152	105	105	106	104
235	203	206	185	108	185	182	167	117		235	190	192	195	190	189	194	198	204	194	198	175	172	172	171	172	100	101	100	100	100	184	184	185	187	185	172	177	174	172	175	151	147	152	154	153	105	105	106	104
236	203	207	186	108	187	182	167	117		236	191	193	196	192	190	195	198	205	195	199	176	172	172	172	173	100	101	100	100	100	184	185	186	188	185	173	178	175	173	176	151	147	152	154	153	105	105	106	104
237	204	208	186	108	188	182	167	117		237	191	194	196	192	190	195	199	206	195	199	176	173	172	172	173	100	101	100	100	100	184	185	186	188	186	173	178	176	173	176	151	149	153	155	154	105	105	106	104
238	204	208	187	108	189	183	168	117		238	192	194	197	193	191	196	199	206	196	200	177	174	173	173	174	100	101	100	100	100	186	186	188	189	187	174	179	176	174	176	152	149	153	155	154	105	105	106	104
239	205	208	187	108	188	183	168	117		239	193	195	197	193	192	197	201	208	197	201	178	174	173	173	175	100	101	100	100	100	186	187	189	190	187	175	179	176	174	176	152	149	153	155	155	105	105	106	104
240	205	209	187	108	188	183	168	117		240	193	196	197	193	192	197	201	208	197	201	179	175	174	174	176	100	101	100	100	100	187	187	189	190	188	176	180	177	174	176	152	149	153	156	155	105	105	106	104
241	206	209	188	108	188	184	168	118		241	194	197	198	194	192	198	201	209	197	202	179	175	174	175	176	100	101	100	100	100	188	188	190	190	188	175	181	177	175	177	152	150	154	156	155	105	105	106	104
242	207	211	188	108	188	184	168	118		242	194	197	199	194	192	199	202	209	198	202	179	175	175	175	176	100	101	100	100	100	188	188	190	191	189	176	181	178	175	178	153	150	154	156	156	105	105	106	103
243	208	211	188	108	191	184	168	118		243	194	198	200	195	193	199	202	210	199	203	180	176	176	176	176	100	101	100	100	100	189	189	191	191	189	176	182	178	175	178	153	150	154	157	157	105	105	106	104
244	208	212	190	108	191	185	169	118		244	195	199	201	196	193	199	203	211	199	203	181	176	177	176	176	100	101	100	100	100	189	189	191	192	189	177	183	179	177	178	153	150	154	157	157	105	106	106	104
245	208	212	190	108	191	185	170	119		245	196	200	202	196	194	200	204	211	200	203	181	177	177	176	177	100	101	100	100	100	189	189	192	192	190	177	183	180	177	179	153	150	154	158	157	105	106	106	104
246	209	213	190	109	191	185	170	119		246	196	201	202	197	195	200	204	212	200	204	182	177	178	177	177	100	101	100	100	100	189	190	192	192	191	178	184	180	178	179	153	150	155	158	157	105	106	106	104
247	210	214	191	109	191	185	170	119		247	197	201	203	197	195	201	205	212	201	204	182	177	178	177	177	100	101	100	100	100	190	190	193	193	191	178	184	180	178	179	154	151	155	158	157	105	106	106	104
248	210	214	191	109	191	185	170	119		248	197	201	204	198	196	202	206	213	201	205	182	177	179	177	178	100	101	100	100	100	191	191	193	193	192	179	184	180	179	180	155	152	155	159	158	105	106	106	104
249	211	215	192	109	191	185	170	120		249	198	202	204	198	196	202	206	213	203	206	183	178	179	178	179	100	101	100	100	100	191	192	193	193	192	179	185	181	179	181	155	152	156	159	158	105	106	106	104
250	213	215	193	109	191	185	170	120		250	199	203	205	199	197	203	207	214	203	207	184	179	180	179	180	100	101	100	100	100	191	192	194	194	193	180	186	182	179	181	156	152	157	160	159	105	106	106	104
251	214	215	193	109	192	185	170	120		251	200	204	205	200	198	204	208	216	204	208	185	181	181	180	181	100	101	100	100	100	192	193	194	195	193	180	186	182	180	181	156	153	157	160	159	105	106	106	104
252	214	216	194	109	192	186	170	120		252	201	205	206	200	198	205	208	217	205	209	185	181	181	180	182	100	101	100	100	100	192	194	195	195	193	180	186	182	180	182	156	153	157	160	159	105	106	106	104
253	215	217	194	109	192	186	170	120		253	202	205	206	201	199	205	209	217	206	209	185	181	181	180	182	100	101	100	100	100	193	194	195	195	195	181	187	183	181	182	156	153	157	160	159	106	106	106	104
254	215	217	195	109	192	187	171	120		254	202	206	207	202	199	206	210	218	207	210	186	181	182	180	183	100	101	100	100	100	193	195	196	196	195	181	187	183	181	182	157	154	157	160	159	106	106	106	104
255	216	217	195	109	192	188	171	120		255	203	207	207	203	201	206	211	219	208	210	186	182	182	181	183	100	101	100	100	100	194	195	197	196	196	182	187	183	181	183	157	154	158	161	160	106	106	106	104
256	217	218	196	109	192	188	172	120		256	203	207	208	203	201	207	212	219	208	211	186	182	183	182	183	100	101	100	100	100	194	196	198	197	196	182	188	184	182	184	158	155	158	161	160	106	106	106	104
257	218	219	196	109	194	189	173	121		257	205	208	209	204	202	207	212	220	209	212	186	182	183	182	183	100	101	100	100	100	194	197	199	198	197	183	188	185	182	184	158	155	158	161	160	106	106	106	105
258	219	220	196	109	194	190	173	121		258	207	209	210	205	203	208	213	220	210	213	187	182	183	183	185	100	101	100	100	100	196	198	200	198	199	184	189	185	183	185	159	156	158	162	160	106	106	106	105
259	220	220	197	109	194	191	174	121		259	207	209	210	205	204	208	214	221	211	214	187	183	183	183	185	100	101	100	100	100	196	199	201	199	198	184	190	185	184	185	159	156	159	162	161	106	106	106	105
260	220	221	198	109	194	191	174	122		260	208	210	211	206	204	209	214	222	211	215	188	183	183	183	185	100	101	100	100	100	197	200	201	200	199	185	191	186	185	185	160	156	159	163	162	106	106	106	105
261	221	222	198	109	194	192	175	122		261	209	211	212	207	205	210	215	222	212	215	189	184	184	184	185	100	101	100	100	100	197	200	202	200	200	186	191	186	186	186	160	157	159	163	162	106	107	106	105
262	222	222	199	110	194	193	175	122		262	210	211	213	207	206	211	215	222	213	216	189	184	185	184	185	100	101	100	100	100	198	200	202	201	200	186	192	187	186	186	160	157	160	163	163	106	107	106	105
263	222	222	199	110	195	193	175	122		263	211	212	214	208	206	211	216	223	213	217	190	185	185	184	186	100	101	100	100	100	198	201	203	201	201	187	193	188	187	187	161	157	160	164	163	106	107	106	105
264	223	223	200	110	196	194	176	122		264	211	212	214	209	207	211	217	224	214	218	191	185	186	184	186	100	101	100	100	100	199	201	203	202	201	188	194	188	187	188	161	157	161	164	163	106	107	106	105
265	223	223	200	110	197	194	176	122		265	211	213	215	209	208	212	218	225	215	219	191	185	186	185	187	100	101	100	100	100	199	202	203	202	201	188	194	189	188	188	162	158	161	164	164	106	107	106	105
266	224	224	201	110	198	194	176	122		266	212	214	215	209	209	213	218	225	215	219	192	186	186	185	187	100	101	100	100	100	200	203	204	203	203	188	195	189	189	188	162	158	162	165	165	106	107	106	105
267	225	224	202	110	200	195	177	122		267	212	215	216	210	210	214	218	227	216	220	192	186	187	185	188	100	101	100	100	100	200	204	205	204	203	189	196	190	190	189	163	159	162	165	165	106	107	106	105
268	225	226	203	110	200	196	177	122		268	212	215	216	211	210	215	220	227	217	221	193	187	188	187	189	100	101	100	100	100	201	204	205	204	203	189	197	191	190	189	163	159	163	165	165	106	107	107	105
269	226	227	203	110	201	196	177	122		269	212	217	217	211	211	215	220	228	217	222	194	187	188	187	189	100	101	100	100	100	201	205	206	206	204	190	197	192	191	190	163	159	163	165	166	106	107	107	105
270	226	227	203	111	202	196	177	122		270	213	217	218	212	212	215	222	229	218	222	194	188	188	187	190	100	101	100	100	100	202	206	206	206	205	190	198	193	191	191	164	159	164	166	167	106	108	107	105
271	227	228	204	111	202	197	177	122		271	214	218	219	212	213	216	222	230	219	223	194	189	189	188	190	100	101	100	100	100	203	207	207	207	205	190	198	193	191	191	164	160	164	166	167	107	108	107	105
272	227	229	204	111	203	197	177	122		272	215	218	219	214	214	217	223	231	219	223	195	189	190	188	190	100	101	100	100	100	203	208	207	208	206	191	199	194	192	191	164	160	164	166	167	107	108	107	105
273	228	230	204	110	204	197	177	122		273	216	219	219	214	215	218	224	232	221	224	195	190	190	189	191	100	101	100	100	100	204	208	207	209	207	191	199	194	192	191	164	161	165	167	168	107	108	107	105
274	229	230	206	110	205	197	177	122		274	217	220	220	215	215	219	224	233	222	225	196	190	190	189	191	100	101	100	100	100	205	210	208	210	208	192	200	194	193	192	164	161	165	168	169	107	108	107	105
275	230	231	207	110	205	197	177	123		275	217	221	221	216	216	220	225	234	223	226	196	190	191	190	191	100	101	100	100	100	206	210	209	211	208	193	200	195	193	192	164	161	165	168	169	107	108	107	105
276	230	232	207	110	206	199	177	123		276	218	221	221	217	216	221	225	234	224	227	196	190	191	190	192	100	101	100	100	100	206	211	210	212	209	193	201	195	194	193	165	162	165	168	170	107	108	107	105
277	231	232	208	110	206	200	178	123		277	218	222	221	217	217	222	227	235	225	228	197	191	192	190	193	100	101	100	100	100	206	212	210	212	211	193	202	196	194	193	166	162	166	169	170	107	108	107	105
278	231	233	208	110	206	200	178	123		278	219	223	221	217	217	223	227	236	226	228	197	191	192	190	193	100	101	100	100	100	207	213	211	213	211	194	202	197	195	194	166	162	166	169	171	107	108	107	105
279	231	235	209	110	207	200	178	123		279	219	223	222	218	218	224	229	237	227	229	197	192	192	191	193	100	101	100	100	100	207	214	212	213	212	195	203	197	196	195	166	162	166	169	171	107	108	107	105
280	231	236	209	110	207	200	178	123		280	220	224	223	219	219	224	230	238	228	230	198	192	193	191	194	100	101	100	100	100	208	214	212	214	212	196	203	198	197	196	166	163	167	169	171	107	108	107	105
281	232	238	209	111	208	200	178	123		281	221	225	223	219	220	225	231	239	229	231	199	193	194	191	194	100	101	100	100	100	209	215	212	214	213	196	204	199	197	196	166	163	167	170	171	107	108	107	105
282	233	239	210	111	209	201	179	123		282	222	225	224	220	221	227	231	240	230	231	200	193	194	192	195	100	101	100	100	100	209	215	213	215	214	197	204	199	197	196	166	163	167	170	171	107	108	107	105
283	233	240	210	111	209	201	179	123		283	223	226	225	220	221	228	232	241	231	232	200	194	194	192	196	100	101	100	100	100	209	216	214	216	214	198	205	200	198	196	166	163	167	170	171	107	108	107	105
284	233	240	210	111	209	201	179	123		284	224	227	225	222	222	228	232	243	232	233	201	195	194	193	196	100	102	100	100	100	210	217	214	217	215	199	205	201	199	197	166	163	167	171	172	107	108	107	105
285	234	242	211	111	210	202	179	123		285	225	228	226	222	223	230	233	244	233	233	201	195	195	194	196	100	102	100	100	100	210	217	215	217	215	199	206	201	200	197	167	164	167	171	172	107	108	108	105
286	234	242	211	111	212	202	180	123		286	226	228	227	223	224	231	234	245	234	234	202	196	195	194	197	100	102	100	100	100	211	218	215	218	216	200	206	201	200	198	167	164	168	172	173	108	108	108	105
287	235	244	211	111	212	203	180	123		287	226	228	227	224	224	232	235	246	235	236	203	196	196	194	197	100	102	100	100	100	211	218	216	218	217	202	207	202	200	198	168	164	169	172	173	108	109	108	105
288	235	245	212	111	213	205	180	123		288	226	229	228	224	225	233	236	246	236	236	204	197	196	195	198	100	102	100	100	101	212	219	217	219	218	202	208	203	201	199	168	165	169	173	173	108	109	109	105
289	236	245	212	111	213	205	180	123		289	227	230	229	225	226	234	238	247	237	237	205	197	197	195	199	101	102	100	100	101	212	220	217	219	219	203	208	204	201	199	168	165	169	174	173	108	109	109	106
290	236	246	213	111	214	205	180	123		290	228	231	230	227	226	234	238	248	239	238	205	198	197	196	199	101	102	100	100	101	214	221	219	220	220	203	208	204	202	200	168	165	169	174	174	108	109	109	106
291	237	246	214	111	215	205	180	123		291	229	232	230	228	227	235	241	249	239	239	206	198	198	196	200	101	102	100	100	101	215	222	219	221	220	204	209	205	202	201	168	166	170	174	174	108	110	109	106
292	237	247	214	111	215	205	180	123		292	230	232	231	228	227	236	242	250	240	240	207	199	199	197	201	101	102	100	100	101	215	222	219	222	221	204	210	206	202	201	169	166	170	174	175	109	110	109	106
293	238	247	215	111	216	206	181	123		293	230	233	231	229	228	237	243	251	241	241	208	200	200	198	201	101	102	100	100	101	216	223	220	223	221	205	210	206	203	202	170	166	170	175	176	109	110	110	106
294	238	247	216	111	216	206	181	124		294	231	234	232	230	229	238	244	252	241	242	208	201	200	199	202	101	102	100	100	101	217	223	221	223	222	205	211	206	204	203	170	167	171	175	176	109	110	110	106
295	238	248	217	111	217	206	181	124		295	233	235	232	230	230	239	244	253	242	244	209	202	201	200	203	101	102	100	100	101	217	224	221	224	223	206	211	207	204	203	171	167	171	175	177	109	110	110	106
296	240	249	217	111	218	207	181	124		296	234	236	233	231	231	240	245	254	243	245	209	202	202	200	204	101	102	100	100	101	218	225	222	225	224	206	212	207	205	204	171	167	172	176	177	109	110	110	106
297	240	249	218	111	219	208	182	124		297	234	237	234	232	231	241	246	255	245	246	210	203	202	201	204	101	103	100	101	101	219	226	224	226	226	207	212	208	206	204	172	168	172	176	177	110	110	110	106
298	241	252	219	111	220	209	182	124		298	235	237	234	233	232	241	247	256	246	248	210	203	203	202	205	101	103	100	101	101	219	226	225	226	226	207	213	209	206	205	172	168	173	176	178	110	110	111	107
299	242	252	220	111	222	210	182	124		299	236	238	235	234	232	242	249	257	247	249	211	203	203	202	206	101	103	100	101	101	220	227	225	227	227	208	214	209	207	206	172	169	173	176	178	110	111	111	107
300	243	252	220	111	223	212	182	124		300	237	239	236	234	233	243	250	257	248	250	212	204	204	203	207	101	103	100	100	101	221	228	226	227	227	209	215	210	209	206	173	169	173	176	178	111	111	111	107
301	243	252	220	111	224	212	182	124		301	238	240	237	236	234	244	251	258	249	251	213	205	205	203	207	101	103	100	101	102	221	229	227	228	228	210	216	211	209	208	174	170	174	177	179	111	111	111	107
302	245	253	221	111	225	213	184	124		302	239	241	238	237	235	245	252	259	250	252	214	205	206	203	208	101	103	101	101	102	222	230	228	229	229	211	216	212	210	209	175	170	174	177	179	111	111	111	107
303	245	254	222	111	225	214	184	124		303	239	242	238	238	236	246	253	260	251	253	214	206	207	204	209	101	103	101	101	102	223	230	229	230	230	212	217	212	210	209	175	170	174	177	180	111	111	111	107
304	246	256	222	111	225	214	184	124		304	240	243	239	239	237	247	254	262	252	254	214	206	207	204	210	102	103	101	101	102	224	231	230	231	231	213	217	213	211	210	176	171	175	178	180	111	111	111	107
305	247	257	222	111	227	214	184	124		305	241	244	240	240	238	248	256	263	253	255	215	207	207	206	211	101	104	101	101	102	224	232	231	233	232	214	218	214	212	210	176	171	175	178	180	111	111	112	108
306	248	258	222	111	228	214	185	124		306	242	245	241	241	238	249	257	264	255	256	216	207	208	206	211	102	104	101	101	102	225	233	233	234	232	215	219	214	213	211	176	172	176	179	181	111	112	112	108
307	249	259	222	111	228	215	185	125		307	242	246	242	242	240	250	258	265	256	257	216	208	209	207	212	102	104	101	101	102	225	234	235	235	234	215	219	215	213	211	176	172	176	179	181	111	112	112	108
308	249	259	222	111	229	215	185	125		308	244	248	243	243	241	252	259	266	256	258	217	208	209	207	213	102	104	101	101	103	227	234	236	236	235	215	220	216	214	212	177	172	176	179	181	112	112	112	108
309	249	260	222	111	230	216	186	125		309	245	249	244	244	242	253	260	267	258	259	217	209	210	207	213	102	104	102	101	103	227	235	237	237	235	216	221	217	214	213	177	173	176	180	182	112	113	113	108
310	250	260	222	111	230	217	186	125		310	246	250	245	245	244	254	262	268	259	261	218	209	210	208	214	102	104	102	101	103	229	235	238	238	236	217	222	217	215	213	178	174	177	180	183	112	113	113	109
311	251	262	222	111	231	217	187	125		311	247	250	245	245	244	255	262	269	260	263	219	210	211	209	215	102	104	102	101	103	229	236	238	239	237	218	222	218	216	214	178	174	177	181	183	112	113	113	109
312	252	264	224	111	231	218	187	126		312	247	251	246	246	245	256	263	271	261	263	220	211	212	210	216	102	104	102	102	103	229	237	239	239	238	219	223	218	217	215	178	175	178	181	183	113	114	113	109
313	253	266	225	111	232	218	187	126		313	248	252	248	247	245	257	265	272	263	264	220	212	213	211	216	102	104	102	102	103	231	238	240	240	238	220	224	219	217	215	178	175	178	181	184	112	114	113	109
314	253	267	225	111	233	219	187	126		314	249	253	249	248	246	258	266	273	264	265	222	213	214	212	217	102	104	102	102	103	232	239	241	242	239	220	225	220	218	216	178	176	179	182	184	112	114	114	110
315	254	268	225	111	234	219	188	126		315	250	254	250	249	246	259	267	275	264	266	224	214	215	213	218	102	104	102	102	103	233	240	242	242	240	221	226	220	219	216	179	176	179	181	185	112	114	114	110
316	254	269	226	111	234	219	188	126		316	251	255	250	250	247	260	268	276	265	267	224	215	215	213	219	102	105	102	102	103	233	241	243	243	241	222	226	221	220	218	179	177	179	182	185	113	114	114	110
317	254	270	227	111	235	220	188	126		317	252	255	252	251	247	262	270	277	266	268	225	215	216	214	220	102	105	102	102	103	234	241	243	244	241	222	227	222	220	218	179	177	179	182	186	113	115	114	110
318	255	270	227	111	236	220	188	126		318	253	256	253	252	249	262	271	278	267	269	227	216	217	215	222	103	105	102	102	103	235	242	244	245	242	223	228	222	221	219	179	178	179	183	186	113	115	114	110
319	256	271	228	111	237	221	188	126		319	255	257	253	253	250	263	272	279	268	271	228	216	218	216	223	103	105	102	102	103	236	242	245	246	242	223	228	222	221	219	179	178	180	183	187	113	115	115	110
320	258	272	228	111	237	221	188	126		320	255	258	254	254	250	264	274	280	269	272	229	217	219	217	223	103	105	102	102	103	237	243	245	246	243	224	229	223	222	221	180	178	180	183	187	113	115	115	110
321	258	272	229	111	237	222	189	126		321	256	259	255	255	251	265	275	282	270	273	229	218	220	217	224	103	105	102	102	103	238	244	246	248	243	225	230	224	223	221	180	179	181	183	187	113	115	115	110
322	258	273	230	111	238	222	190	126		322	257	260	256	256	251	266	276	283	271	274	230	219	220	218	224	103	105	102	102	103	239	245	247	249	244	225	230	225	224	221	180	179	181	184	188	113	115	115	110
323	260	273	230	111	239	222	191	126		323	258	261	257	257	252	267	277	284	272	275	230	219	222	219	225	103	105	103	102	103	240	245	248	250	245	226	231	225	224	222	181	179	181	184	188	113	115	115	110
324	260	274	230	112	240	223	191	126		324	258	261	258	258	253	268	278	285	273	275	231	220	222	219	226	103	105	103	102	104	241	246	248	251	246	227	232	226	224	222	182	180	182	185	189	114	115	115	110
325	261	275	231	112	240	223	193	127		325	259	262	259	259	255	269	278	285	273	276	231	220	223	220	227	103	105	103	102	104	242	247	249	252	247	227	232	226	226	223	182	180	182	186	190	114	115	116	111
326	262	276	232	112	240	224	193	127		326	261	263	260	261	256	271	280	287	274	278	233	221	224	221	228	103	105	103	102	104	242	248	250	253	247	228	232	227	227	224	183	181	183	186	191	114	115	116	111
327	262	276	233	112	242	224	193	127		327	262	264	261	262	257	272	281	288	275	279	233	223	225	222	229	103	105	103	102	104	243	249	251	253	249	229	233	228	227	224	183	181	183	186	191	114	115	116	111
328	264	277	234	112	242	224	194	127		328	263	265	263	262	258	272	282	290	276	280	234	225	226	223	229	103	105	103	103	104	244	250	252	254	250	230	234	228	227	225	183	181	184	187	192	114	115	116	111
329	264	278	234	112	243	225	194	127		329	264	266	264	263	259	273	283	291	278	282	235	226	226	223	230	103	105	103	103	104	244	250	253	254	251	231	235	229	228	226	183	182	184	188	193	114	115	116	111
330	265	279	234	112	244	226	194	127		330	264	267	264	263	260	274	285	292	279	283	235	226	227	223	231	103	105	103	103	104	246	251	254	256	251	231	235	230	228	226	184	182	184	188	193	115	115	116	111
331	266	279	235	112	244	226	194	126		331	265	268	265	264	261	276	286	293	280	284	236	227	228	224	231	103	105	103	103	104	247	252	254	257	253	232	236	231	229	227	185	183	186	189	193	115	116	117	111
332	267	281	235	112	245	226	194	126		332	266	269	266	265	262	277	287	294	281	285	237	227	229	225	232	103	105	103	103	104	248	253	255	257	254	232	237	231	229	227	186	183	186	190	194	115	116	117	111
333	268	282	235	112	246	227	195	126		333	268	270	268	266	262	278	289	295	282	287	238	228	230	225	233	104	105	103	103	104	249	254	256	258	254	232	237	231	230	228	186	183	187	190	194	115	116	117	111
334	268	282	235	112	246	229	195	126		334	269	270	269	267	263	280	290	296	283	288	239	229	231	226	233	104	105	103	103	104	250	254	257	258	254	233	238	232	231	229	186	184	187	190	194	115	116	117	112
335	268	283	236	111	247	229	196	126		335	270	271	270	268	264	281	291	297	285	289	240	230	232	227	234	104	105	103	103	104	251	255	258	259	255	234	238	233	231	230	187	185	188	191	194	115	117	117	112
336	269	284	237	111	248	230	196	126		336	271	272	271	269	265	281	292	299	286	290	241	231	232	227	235	104	105	103	103	104	251	256	259	260	257	235	240	234	233	231	187	185	188	192	195	116	117	117	112
337	270	284	237	111	248	230	196	125		337	271	273	272	270	266	282	293	300	287	292	242	231	233	228	236	104	105	103	103	104	252	257	260	261	258	237	241	236	234	232	188	185	189	192	195	116	117	117	112
338	270	285	239	111	249	231	196	125		338	272	274	273	272	267	283	294	301	288	293	242	232	233	229	236	104	106	103	103	105	253	258	261	262	258	238	242	237	235	233	189	186	189	193	196	116	117	118	112
339	271	285	239	111	250	231	197	125		339	272	276	274	273	268	283	295	301	288	294	243	233	234	229	237	104	106	104	103	105	254	258	261	264	259	238	243	237	236	234	189	186	190	193	196	116	118	118	112
340	271	286	239	111	251	232	197	125		340	273	276	275	274	268	285	296	302	289	296	244	234	235	230	238	104	106	104	103	105	255	260	262	265	260	239	244	238	236	234	190	186	190	193	196	117	118	118	112
341	272	288	239	111	251	232	198	126		341	275	277	277	275	270	286	298	303	290	297	245	234	235	231	239	104	106	104	103	105	256	261	263	266	261	239	245	238	237	234	191	187	191	194	197	117	118	118	113
342	273	288	240	111	252	233	198	125		342	275	279	278	276	271	287	299	304	291	297	245	234	236	232	239	104	106	104	103	105	257	263	264	266	262	240	245	239	237	236	191	188	191	194	198	117	118	118	113
343	274	291	240	111	253	233	198	125		343	276	280	279	277	271	289	300	305	293	298	247	235	237	233	240	104	106	104	103	105	258	264	265	267	263	241	247	240	239	237	191	189	192	195	198	117	118	118	113
344	275	292	240	111	254	234	198	125		344	278	281	281	278	273	290	301	306	294	299	247	236	238	234	241	104	106	104	103	105	259	264	266	268	264	242	248	240	239	238	191	189	193	195	198	117	118	118	113
345	276	293	240	111	254	234	199	126		345	279	282	282	279	273	290	302	307	295	300	248	237	239	234	242	104	106	104	103	105	260	265	267	269	265	243	249	241	240	239	191	189	193	195	199	117	118	118	113
346	276	293	242	111	254	236	199	126		346	280	282	284	280	274	291	303	307	295	301	249	237	239	236	243	105	106	104	103	105	261	266	268	271	265	244	250	242	241	240	192	190	194	196	200	117	119	118	113
347	276	294	243	111	255	236	200	126		347	281	283	285	281	275	293	304	308	297	302	250	238	240	237	243	105	106	104	103	105	262	267	269	271	266	245	251	243	242	241	192	191	195	197	200	117	119	118	113
348	277	294	243	111	257	236	200	126		348	282	284	286	283	276	294	305	309	298	303	251	238	241	238	244	105	106	104	103	105	262	268	270	272	266	246	252	244	243	242	193	191	195	197	201	117	119	118	113
349	277	294	244	111	258	237	200	126		349	283	285	287	283	277	295	306	311	299	304	252	239	242	239	246	105	106	104	103	105	262	269	270	272	267	247	252	245	244	243	194	191	195	197	201	117	119	119	114
350	277	295	245	111	260	237	200	126		350	284	286	288	285	278	296	307	313	300	305	252	240	243	241	246	105	106	104	103	105	263	270	271	273	268	247	253	246	244	244	194	192	196	197	201	117	119	119	114
351	277	296	245	111	261	237	200	126		351	284	287	289	285	280	298	308	313	301	306	253	241	243	241	247	105	106	104	103	105	264	271	272	274	269	248	254	247	245	245	195	193	196	198	202	117	119	119	114
352	279	296	246	111	261	238	200	126		352	286	289	290	286	280	299	310	315	302	307	255	241	244	242	248	105	106	104	104	105	265	272	272	275	270	249	255	248	246	246	196	193	197	198	202	118	119	119	114
353	279	297	246	111	261	239	200	126		353	287	289	292	287	282	299	311	316	303	308	256	242	245	243	249	105	107	104	104	105	265	273	273	276	271	250	256	250	246	247	196	194	197	198	202	118	120	119	115
354	280	298	247	112	262	240	202	126		354	288	291	293	287	283	300	313	317	303	309	257	243	246	244	250	105	107	105	104	105	266	274	274	277	272	251	257	250	247	248	197	194	198	199	203	118	120	119	115
355	281	299	248	112	262	241	202	126		355	290	292	294	288	284	301	314	318	305	310	257	243	247	245	251	105	107	105	104	105	267	274	274	278	273	251	257	251	248	249	197	194	198	200	203	118	120	119	115
356	281	299	248	112	263	242	202	126		356	291	293	295	290	284	302	315	319	305	312	259	244	248	246	253	105	107	104	104	105	268	275	275	278	273	253	258	252	248	250	198	195	199	200	204	118	120	119	115
357	281	300	249	112	263	243	203	126		357	292	294	297	291	285	303	316	320	306	313	260	245	249	246	253	105	107	104	104	105	268	276	276	279	274	253	259	253	249	251	199	196	200	201	204	118	120	120	115
358	282	300	250	112	265	244	204	127		358	293	295	298	292	286	304	317	320	307	314	261	246	251	247	254	106	107	104	104	105	270	276	277	280	275	255	260	253	249	251	199	196	200	202	205	118	120	120	115
359	283	301	251	113	266	244	204	127		359	294	296	299	293	287	305	318	322	308	316	262	247	252	248	255	106	107	105	104	105	271	277	278	281	276	257	261	254	249	253	200	197	201	203	206	118	120	120	115
360	284	302	252	113	268	245	205	127		360	295	298	300	294	289	306	319	323	309	317	263	248	253	248	256	106	107	105	104	106	272	277	279	282	276	258	262	255	251	254	200	197	201	203	207	119	120	120	115
361	285	302	252	113	270	247	205	127		361	296	299	302	296	289	307	320	324	311	319	264	249	253	250	257	106	107	105	104	106	272	278	280	282	277	258	263	256	252	254	201	198	201	203	207	119	120	120	115
362	286	302	253	113	272	247	206	127		362	298	300	303	297	290	308	321	325	311	320	265	250	254	251	257	106	107	105	104	106	274	279	280	283	279	259	264	257	253	255	201	198	202	204	208	119	120	121	115
363	287	304	254	113	274	247	207	127		363	299	302	304	298	291	308	322	326	313	321	266	252	255	252	258	106	107	105	104	106	275	280	281	285	280	259	264	258	254	255	201	199	203	205	208	119	120	121	115
364	288	305	254	113	274	248	207	127		364	300	303	305	299	292	310	323	327	314	322	266	253	256	252	259	107	107	105	105	106	277	281	282	286	282	260	265	258	254	257	202	199	203	206	209	119	121	121	115
365	288	305	254	113	275	249	207	128		365	301	304	306	300	293	311	323	329	315	323	267	253	257	253	260	107	107	105	105	106	278	282	283	286	282	261	265	259	255	257	203	199	204	206	209	119	121	121	115
366	288	307	254	113	277	249	207	128		366	302	306	307	302	294	313	324	330	316	324	268	254	258	253	260	107	108	105	105	106	279	283	283	287	283	262	267	261	255	257	203	200	204	207	211	119	121	122	116
367	289	307	255	113	278	249	208	128		367	303	307	308	303	295	314	325	331	317	326	270	255	259	254	261	107	108	105	105	106	280	284	284	288	284	263	267	261	256	258	204	201	205	207	211	119	121	122	116
368	291	307	255	113	279	250	208	128		368	304	307	309	304	297	315	327	333	318	326	271	255	259	255	262	107	108	105	105	106	281	285	284	289	285	264	268	262	257	259	204	202	206	207	212	120	121	122	116
369	291	308	257	113	281	251	208	128		369	305	308	310	305	298	316	328	335	319	327	271	256	259	256	263	107	108	105	105	106	281	286	285	290	286	264	269	262	257	260	205	202	206	208	212	120	121	122	116
370	293	308	257	113	282	251	209	128		370	307	309	312	306	299	318	329	336	320	328	272	257	260	256	263	107	108	105	105	106	282	287	286	291	287	266	270	263	258	262	205	202	206	209	212	120	122	123	116
371	293	310	258	113	283	252	209	128		371	308	309	314	307	300	319	329	337	321	329	273	258	261	258	264	107	108	105	105	106	283	287	287	292	288	267	271	265	259	262	206	202	207	209	213	120	122	123	116
372	294	310	258	113	284	252	210	128		372	309	311	314	308	301	320	330	338	322	330	274	260	261	258	266	107	108	105	105	106	284	288	289	293	290	268	271	265	259	262	207	203	208	210	214	120	122	123	116
373	294	312	258	113	285	253	210	128		373	310	312	315	309	302	321	331	339	323	331	275	260	263	259	266	107	108	105	105	106	286	289	290	293	291	269	272	267	260	263	207	204	209	210	214	120	122	123	116
374	296	313	258	113	285	254	211	129		374	311	313	316	310	303	322	333	340	324	332	276	261	264	260	268	107	108	105	105	106	287	290	290	294	291	269	274	269	261	265	207	205	209	211	216	121	122	123	116
375	296	313	258	113	285	254	211	129		375	313	314	317	311	305	323	334	341	325	334	277	262	264	261	269	107	108	105	105	106	287	291	291	296	292	270	274	270	262	265	208	206	210	212	216	121	122	123	117
376	297	314	259	113	286	255	212	129		376	314	316	318	313	306	324	335	342	327	335	278	263	265	262	270	108	108	105	105	106	288	292	292	297	293	271	275	270	262	266	208	207	210	213	217	121	122	123	117
377	297	315	259	113	287	255	212	130		377	316	316	319	314	307	325	337	344	328	337	279	264	266	264	270	108	108	106	105	106	289	293	293	297	293	272	275	271	263	267	209	208	211	213	217	121	123	124	117
378	298	316	260	113	287	256	214	130		378	316	317	320	315	309	325	337	345	329	337	280	265	267	265	271	108	109	106	105	106	290	294	294	298	294	273	276	271	264	268	210	208	211	213	218	121	123	124	117
379	299	317	260	113	288	256	215	130		379	317	318	320	316	310	327	338	346	330	339	281	266	268	266	271	108	109	106	105	106	291	295	295	299	296	273	277	272	264	270	210	209	212	213	218	121	123	124	117
380	300	318	260	113	290	256	216	130		380	318	319	322	317	311	328	338	348	331	340	281	267	269	267	272	108	108	105	106	106	292	296	296	300	297	274	278	273	265	270	211	209	213	214	219	121	123	124	118
381	300	319	262	113	290	257	216	131		381	320	320	322	318	312	329	339	349	332	341	282	267	270	268	273	108	108	106	106	107	293	297	297	301	298	275	279	273	266	271	212	210	214	215	220	121	123	124	118
382	300	319	262	113	291	257	217	131		382	320	321	323	319	313	330	341	350	333	341	283	268	271	269	273	108	108	106	106	107	293	297	298	302	299	275	279	273	267	272	212	210	215	215	220	121	123	124	118
383	302	319	264	113	292	257	218	131		383	321	323	325	320	314	331	342	352	334	342	284	270	272	270	274	108	109	106	106	107	294	299	300	304	300	276	280	274	268	273	212	211	215	216	221	122	123	124	118
384	303	320	265	114	293	257	219	131		384	323	324	327	321	315	332	344	354	335	343	285	271	273	271	275	108	109	105	106	107	295	299	301	305	301	277	280	275	269	273	213	212	216	217	221	122	123	125	118
385	303	320	265	114	294	258	220	131		385	324	325	329	322	316	333	345	355	336	345	286	273	274	272	276	108	109	105	106	107	295	299	303	307	301	277	282	276	270	275	213	212	217	218	222	122	124	125	118
386	304	322	266	114	294	258	221	131		386	326	327	330	323	318	334	346	356	338	346	287	274	274	273	276	108	109	105	106	107	296	300	303	308	302	278	282	278	271	276	214	213	217	218	223	122	124	124	118
387	305	322	266	114	294	258	221	131		387	326	328	331	324	319	335	347	357	338	348	288	275	276	275	277	108	109	105	106	107	297	302	304	309	303	279	283	279	272	278	214	213	218	219	224	122	124	125	118
388	305	323	267	114	295	259	221	131		388	328	329	332	325	320	337	348	358	340	349	288	276	276	275	278	108	109	106	106	107	298	303	305	309	304	280	284	279	272	279	215	214	219	220	225	122	124	125	118
389	305	324	268	114	296	259	222	131		389	329	330	334	326	321	338	349	359	341	349	289	277	276	276	279	108	109	106	106	107	299	303	307	311	305	280	285	280	273	280	216	214	220	220	226	122	124	125	118
390	305	324	268	114	297	260	222	131		390	330	332	335	328	322	339	350	360	343	351	290	278	277	277	279	108	109	106	106	107	299	304	308	312	307	281	286	281	274	280	217	215	221	221	227	122	124	125	119
391	306	325	268	114	298	261	223	131		391	331	332	335	329	323	340	351	361	343	353	291	279	279	278	280	108	109	106	106	107	299	305	308	313	307	281	287	281	274	281	217	216	221	222	227	122	125	126	119
392	306	326	269	114	300	262	223	132		392	332	333	337	330	324	341	352	362	344	355	292	280	279	279	281	109	109	106	106	107	300	306	309	314	307	282	287	282	275	282	218	216	221	223	228	122	125	126	119
393	307	327	271	114	300	262	223	132		393	333	334	338	331	326	341	353	363	346	356	293	282	281	279	282	109	109	106	106	107	302	308	310	315	309	283	288	283	276	283	219	217	223	223	230	122	125	126	119
394	308	327	271	114	301	263	224	132		394	333	336	339	332	328	343	356	364	347	357	294	283	282	280	283	109	109	106	106	107	303	309	311	316	309	284	289	284	276	283	220	217	223	224	230	122	126	126	119
395	309	328	272	114	302	264	224	132		395	334	337	340	334	328	343	357	365	348	358	295	284	283	282	284	109	109	106	106	107	303	310	312	317	310	285	290	285	277	284	221	218	223	224	231	123	126	126	119
396	310	328	273	114	302	264	225	132		396	336	339	341	336	330	344	358	367	350	358	296	284	284	283	285	109	109	106	107	107	304	311	313	318	311	286	291	285	278	284	222	218	224	225	232	123	126	126	119
397	310	329	274	114	302	264	225	132		397	337	340	343	336	331	345	359	368	351	359	298	285	285	284	286	109	109	106	107	107	305	311	315	318	311	287	293	286	279	285	222	219	225	226	232	123	125	126	119
398	310	329	274	114	303	265	225	132		398	338	342	344	338	332	346	360	369	352	360	299	286	285	285	287	109	109	106	107	107	306	312	316	319	312	288	294	288	280	286	223	220	226	226	233	123	126	126	119
399	310	330	275	114	304	265	227	132		399	339	343	345	339	333	347	361	370	353	361	300	287	286	286	288	109	109	106	107	107	306	313	317	320	313	289	295	288	282	287	225	221	226	227	233	123	126	127	119
400	312	332	275	114	306	266	228	132		400	340	344	347	340	333	348	362	371	354	362	300	289	287	287	289	109	109	106	107	107	307	314	318	321	315	290	296	289	282	288	225	221	227	228	234	123	126	127	119
										401	341	345	348	341	334	349	363	372	356	363	301	289	289	288	290	109	109	106	107	107	308	315	319	322	316	291	297	290	283	289	226	222	228	229	236	123	127	127	120
										402	342	347	349	342	335	350	364	374	357	364	302	290	289	289	291	109	109	106	107	107	308	316	321	322	317	292	298	291	284	291	226	222	228	230	236	123	127	127	120
										403	342	348	350	345	336	351	365	376	358	365	303	291	290	290	292	110	109	106	107	107	310	317	323	323	318	292	299	292	285	292	227	223	229	231	237	124	127	127	120
										404	343	348	351	346	338	353	366	377	359	366	304	292	291	291	293	110	109	106	107	108	311	318	324	323	318	293	300	293	285	293	228	224	229	231	237	124	127	127	120
										405	345	351	352	346	339	354	366	378	359	367	305	293	292	292	294	110	109	106	107	108	311	319	324	326	319	294	301	294	286	294	228	224	229	231	238	124	128	127	120
										406	346	351	353	348	341	355	368	379	360	368	306	295	293	294	295	110	109	106	107	108	312	320	326	327	320	295	302	295	287	295	229	224	230	232	238	124	128	127	120
										407	347	352	355	348	343	356	369	380	361	369	307	296	295	295	297	110	109	106	107	108	313	321	326	328	321	296	303	295	287	296	229	225	231	233	239	124	127	127	121
										408	349	353	356	350	344	358	370	381	362	370	308	297	295	296	297	110	109	107	107	108	313	323	327	328	323	297	304	296	288	297	230	225	232	234	239	124	127	127	121
										409	350	354	358	351	345	359	372	382	362	371	309	298	296	297	298	110	109	107	107	108	314	324	328	329	323	298	305	297	289	298	230	226	232	235	240	124	128	127	121
										410	351	355	359	352	346	360	374	383	363	372	310	299	296	298	299	110	109	107	107	108	315	325	329	330	323	299	305	298	291	299	232	227	233	236	241	124	128	128	121
										411	352	357	360	353	347	362	375	385	365	373	311	300	296	300	301	110	109	107	108	108	315	327	330	331	324	299	306	299	291	300	233	228	233	237	242	125	128	128	121
										412	353	358	362	355	348	364	376	386	366	374	312	301	298	300	302	110	109	106	108	108	317	328	330	332	325	300	307	300	292	301	233	229	233	238	243	125	128	128	121
										413	353	359	363	356	349	365	378	387	368	375	313	301	298	302	302	110	109	106	108	108	319	329	332	333	325	301	309	301	294	302	234	229	234	239	243	125	128	128	122
										414	354	361	364	357	350	366	379	389	369	376	314	302	299	302	303	110	109	107	108	108	320	330	332	334	326	302	309	302	294	302	235	229	234	240	243	125	128	128	122
										415	355	362	366	359	352	367	381	390	370	377	315	304	300	303	304	110	109	107	108	108	321	331	334	335	328	302	310	303	295	303	235	229	235	241	244	125	128	128	122
										416	356	363	367	360	353	369	382	392	371	378	316	305	301	304	305	110	109	107	108	108	322	333	335	336	329	304	312	304	296	303	236	229	236	242	245	125	128	128	123
										417	358	365	368	362	354	370	383	393	372	380	317	306	303	306	305	111	109	107	108	108	323	333	336	337	330	305	313	305	297	305	237	230	236	242	245	126	128	128	123
										418	359	365	369	363	355	371	385	394	373	381	318	306	304	306	306	111	109	107	108	108	324	335	337	338	330	306	314	306	298	305	237	231	237	242	245	126	128	129	123
										419	360	367	370	364	356	373	386	396	375	382	319	307	305	307	307	111	109	107	108	108	325	337	338	339	332	306	315	306	299	306	237	232	238	243	245	126	128	129	123
										420	361	368	371	365	357	374	386	397	376	384	320	308	305	308	308	111	109	107	108	108	326	338	339	340	333	307	316	307	301	307	237	233	238	243	246	126	129	129	123
										421	363	368	373	367	358	375	387	399	377	385	321	309	307	309	309	111	109	107	108	108	327	339	340	341	334	308	316	308	302	308	238	234	239	244	247	126	129	130	124
										422	364	369	374	368	359	375	389	400	378	386	322	310	308	310	311	111	109	107	108	108	328	340	340	342	336	309	317	310	303	309	239	234	239	244	247	126	129	130	124
										423	365	370	375	369	360	377	390	401	380	388	323	311	309	310	311	111	109	107	108	108	329	342	341	343	336	310	318	311	305	310	239	235	240	245	249	126	129	130	124
										424	366	371	376	370	362	378	391	403	382	389	324	312	310	311	312	112	109	107	108	108	330	343	342	344	337	311	319	312	306	311	240	235	240	246	250	126	129	130	124
										425	367	373	377	372	363	380	393	405	383	391	325	312	311	312	314	112	109	107	108	108	331	344	343	345	339	311	320	312	307	312	241	236	241	247	250	127	130	131	124
										426	368	374	378	373	364	381	394	406	385	392	326	314	312	313	315	112	109	107	108	109	332	345	344	346	339	312	321	313	307	314	242	237	242	248	251	127	130	131	124
										427	370	376	379	374	365	382	395	408	387	393	326	314	314	314	315	112	109	107	108	109	333	347	345	346	340	314	323	314	308	315	242	237	242	249	252	127	130	131	124
										428	371	378	381	375	366	383	396	410	388	394	327	315	314	316	317	112	110	107	109	109	334	347	346	347	341	315	324	315	309	315	243	237	243	250	253	127	130	131	124
										429	373	379	382	376	367	385	397	412	389	396	328	316	315	316	318	112	110	107	109	109	335	349	348	348	342	315	325	316	309	317	243	238	244	251	253	127	130	131	125
										430	375	380	384	377	368	386	399	414	391	398	329	317	316	317	319	112	110	107	109	109	336	350	349	350	343	316	327	317	310	317	244	239	245	251	254	127	131	131	125
										431	375	381	385	378	369	388	400	415	392	399	331	318	317	317	320	113	110	107	109	109	336	351	349	351	345	317	328	318	312	318	246	240	246	252	254	127	131	131	125
										432	377	383	387	379	371	390	402	417	393	401	332	320	319	318	321	113	111	107	109	109	337	352	350	352	346	318	328	319	313	319	247	240	246	253	255	127	131	131	125
										433	378	384	388	380	372	391	404	418	394	402	332	321	320	319	322	113	111	107	109	109	338	354	351	353	347	319	328	320	315	319	247	241	247	253	255	128	131	131	125
										434	380	385	390	382	374	392	406	419	396	403	333	322	321	319	323	113	111	107	109	109	339	354	351	355	348	320	329	322	315	321	248	242	248	254	256	128	132	131	125
										435	381	386	391	383	375	393	407	421	397	405	334	322	322	320	324	113	111	108	109	109	340	355	352	357	348	321	330	323	317	321	248	242	248	254	257	128	132	132	125
										436	383	388	391	384	376	396	408	422	398	406	335	323	323	321	325	113	111	108	109	109	342	356	354	358	349	322	330	324	318	322	249	243	249	255	258	128	132	132	125
										437	384	390	393	385	377	397	410	424	399	408	337	323	324	323	326	113	111	108	109	109	343	357	354	359	351	323	331	325	319	322	249	243	249	256	259	128	132	132	126
										438	385	391	395	387	378	398	412	425	401	409	338	325	325	324	327	113	111	108	109	109	344	359	355	359	353	324	332	326	320	324	249	244	251	257	260	128	132	132	126
										439	386	393	396	388	380	399	413	427	403	410	339	325	326	325	328	113	111	108	109	109	345	360	357	360	355	324	333	327	320	325	250	245	252	257	261	129	132	132	126
										440	388	395	397	390	381	400	414	429	405	411	339	327	328	326	329	113	111	108	109	109	345	360	358	361	356	325	334	329	322	326	251	246	252	258	262	129	132	133	126
										441	390	396	399	393	382	402	416	430	407	413	341	328	328	328	330	113	111	108	109	109	346	361	360	362	357	326	335	330	322	326	252	246	253	259	262	129	132	133	126
										442	391	398	400	394	384	403	417	431	408	415	342	330	330	329	331	113	111	108	109	109	348	362	361	364	359	327	336	330	323	327	253	246	253	260	263	129	132	133	126
										443	392	399	401	395	385	404	418	432	409	417	343	331	331	330	332	113	111	108	109	109	350	363	361	366	359	327	338	331	324	328	253	247	254	261	264	130	132	133	127
										444	394	400	402	396	387	406	419	434	411	418	344	332	332	331	333	113	111	108	109	110	350	364	362	367	361	329	339	332	325	329	254	248	254	261	265	130	132	133	127
										445	396	402	404	397	388	407	420	436	413	419	344	334	333	332	334	113	111	108	109	110	352	366	364	367	362	330	340	333	326	330	254	248	255	262	265	130	133	133	127
										446	397	404	405	398	388	409	422	437	414	421	346	335	334	333	335	114	111	108	109	110	353	367	365	368	363	331	341	334	326	330	255	249	255	263	266	130	133	133	127
										447	399	405	407	400	390	410	423	438	416	422	347	336	336	334	336	114	111	108	109	110	354	368	366	369	364	331	342	335	327	331	255	250	256	264	266	130	133	133	127
										448	401	407	407	401	391	412	425	440	418	423	348	337	337	334	337	114	111	109	109	110	355	369	367	371	366	332	343	336	328	332	256	250	256	264	266	130	134	133	128
										449	402	407	409	403	393	413	426	441	420	424	349	339	337	336	338	114	112	109	109	110	356	370	368	372	367	332	344	336	329	333	257	250	257	265	267	130	134	133	128
										450	404	408	410	404	395	414	427	443	422	426	350	339	338	338	339	114	112	109	109	110	358	372	369	373	368	333	345	338	330	334	257	251	258	266	268	130	134	133	128
										451	405	410	412	405	397	416	429	445	424	427	351	340	339	338	341	114	112	109	110	110	359	373	370	375	369	334	345	340	331	335	258	252	258	267	269	131	134	134	128
										452	406	412	413	406	398	416	431	447	426	429	353	340	340	339	342	114	112	109	110	110	360	374	371	376	371	335	346	341	332	335	259	254	259	267	269	131	134	134	128
										453	408	413	415	408	399	418	432	449	427	430	354	341	341	341	343	114	112	109	110	110	361	375	372	377	372	336	347	342	333	336	260	254	260	268	270	131	135	134	128
										454	409	414	416	409	402	419	434	451	429	431	355	343	342	343	344	114	112	109	110	110	362	375	374	377	372	336	348	343	335	337	260	255	260	269	272	131	135	134	128
										455	410	416	418	411	403	421	436	453	430	434	357	344	343	344	345	114	112	109	110	110	364	377	375	378	374	337	349	344	336	338	261	255	261	269	272	131	135	134	128
										456	412	417	419	413	405	423	437	454	432	436	359	345	344	345	346	114	112	109	110	110	364	378	376	379	375	337	351	345	336	339	262	256	262	270	272	132	135	134	128
										457	413	417	420	414	406	424	438	457	434	437	360	346	345	346	348	114	112	109	110	110	366	380	377	381	377	338	351	346	337	340	262	257	262	271	272	132	135	135	129
										458	415	420	421	415	407	425	439	458	436	438	361	347	345	347	349	114	112	109	110	110	367	381	378	382	378	339	352	347	339	341	263	258	263	272	273	132	136	135	129
										459	416	422	422	416	409	427	441	459	437	439	363	348	347	347	349	114	112	109	110	110	368	382	380	383	379	341	353	348	339	342	263	259	264	273	274	132	136	135	129
										460	418	424	423	418	410	428	442	460	439	440	363	349	348	348	350	114	112	109	110	110	369	383	380	384	380	342	354	350	341	343	264	260	265	273	275	133	137	135	129
										461	420	425	425	420	410	430	444	462	440	442	364	350	348	349	352	114	112	109	110	111	370	385	381	385	381	343	356	351	342	345	264	260	265	274	275	133	137	135	129
										462	423	426	426	421	412	432	446	463	442	443	366	351	350	351	353	115	113	109	111	111	372	386	383	387	382	344	356	352	343	346	265	260	266	275	276	133	137	136	129
										463	424	428	428	423	415	433	448	465	443	445	367	352	351	352	354	115	113	109	111	111	373	388	384	389	383	346	358	353	345	347	266	261	267	275	277	133	137	136	129
										464	426	429	429	424	416	435	449	467	444	447	368	353	352	353	354	115	113	109	111	111	375	390	385	391	385	347	358	354	346	348	266	262	268	276	278	133	137	136	129
										465	428	430	430	425	418	436	451	468	446	448	370	354	353	354	355	115	113	109	111	111	377	391	385	391	386	348	359	355	347	350	267	262	268	277	278	133	137	136	129
										466	430	431	432	427	419	438	453	470	448	450	371	355	354	356	357	115	113	109	111	111	378	392	387	392	387	349	360	356	348	351	267	264	269	278	279	133	137	136	130
										467	431	432	433	428	421	439	455	471	449	452	372	356	355	356	358	115	114	109	111	111	379	393	388	394	389	350	362	358	349	351	268	265	270	279	279	133	137	137	130
										468	432	433	436	430	423	441	456	473	451	453	374	357	356	358	359	115	114	109	111	111	380	394	389	395	391	351	363	359	349	352	269	265	271	280	281	134	137	137	130
										469	434	434	437	431	425	443	458	475	452	455	375	359	358	359	360	115	114	109	111	111	382	396	390	396	391	352	364	361	351	353	270	266	272	280	282	134	138	137	130
										470	435	436	438	433	427	444	459	476	453	457	376	360	359	360	362	115	114	109	111	111	383	397	392	396	392	353	365	362	352	354	271	266	273	281	283	134	138	137	130
										471	437	438	439	434	428	446	461	479	455	460	377	361	360	361	363	115	115	109	111	111	385	398	393	397	394	354	366	362	353	355	271	267	273	281	283	134	138	137	130
										472	438	440	441	436	429	448	463	480	456	461	378	361	361	361	364	115	115	109	111	111	386	399	393	398	394	355	367	364	354	356	272	268	274	282	284	135	138	138	130
										473	439	441	443	438	431	449	464	483	458	463	379	363	362	362	365	115	115	109	111	111	387	400	395	399	395	356	368	365	355	357	273	268	275	283	285	135	138	138	131
										474	441	443	444	440	433	451	466	485	460	465	380	364	363	363	367	115	115	109	111	111	388	402	396	401	396	357	369	365	356	358	273	269	276	284	286	135	138	138	131
										475	443	444	445	442	434	452	467	486	462	467	382	365	364	363	368	115	115	109	111	111	389	403	397	402	398	359	372	367	358	359	274	270	276	284	287	135	139	138	131
										476	444	446	447	443	435	454	470	488	464	469	383	367	366	365	368	115	115	109	111	111	390	405	398	404	399	360	374	368	359	361	275	271	277	285	288	135	139	138	132
										477	446	448	448	446	437	456	471	489	465	470	384	368	366	366	370	115	115	109	111	112	391	406	400	406	401	361	375	368	360	363	276	272	277	286	289	136	139	139	132
										478	448	449	450	448	438	458	473	490	467	472	386	369	368	367	372	115	115	109	111	112	393	407	402	408	402	362	377	369	362	364	277	272	278	287	289	136	139	139	132
										479	449	451	451	451	440	461	476	492	468	474	388	371	369	368	373	115	115	109	112	112	394	408	403	409	403	364	379	370	364	365	277	273	279	288	289	136	139	139	133
										480	451	452	453	452	442	462	477	493	471	476	389	372	371	369	374	115	116	110	112	112	395	410	404	410	404	365	380	370	365	365	278	273	280	289	290	136	139	139	133
										481	452	453	454	453	443	464	479	496	473	479	391	373	371	370	376	116	116	110	112	112	396	410	405	412	405	367	381	371	366	366	279	274	281	289	291	136	139	140	133
										482	454	455	456	454	444	466	480	497	474	482	391	374	372	372	378	115	116	110	112	112	397	412	407	413	406	368	383	373	368	368	279	274	281	290	292	137	140	140	133
										483	457	456	458	456	446	468	481	500	477	484	393	375	374	373	379	115	116	110	112	112	398	414	408	414	408	369	384	373	369	370	280	275	282	292	293	138	140	140	133
										484	459	459	460	458	447	470	483	501	477	485	394	377	375	375	381	116	116	110	112	112	399	415	410	415	409	371	386	375	370	371	280	276	283	292	294	138	140	140	134
										485	461	461	461	459	450	472	485	503	478	488	396	378	376	376	381	116	116	110	112	112	401	417	412	417	410	371	386	375	372	372	282	277	284	292	294	138	141	141	134
										486	462	463	463	460	451	474	487	505	480	492	397	378	378	378	382	116	116	110	112	112	402	419	413	418	412	372	387	376	373	373	282	277	284	293	295	138	141	141	134
										487	465	464	464	461	453	476	489	507	482	493	399	379	380	380	384	116	116	110	112	112	403	420	414	419	413	373	388	377	373	374	283	278	284	294	295	138	141	141	134
										488	467	467	466	463	454	477	490	509	484	495	400	380	381	380	386	116	116	110	112	112	405	422	415	421	415	374	389	379	374	375	283	279	285	294	296	139	141	141	134
										489	468	469	467	465	456	479	493	510	485	497	402	382	382	382	387	116	116	110	112	112	406	424	417	422	416	376	389	380	376	377	284	280	286	295	297	139	141	142	134
										490	470	471	469	467	457	481	495	512	487	498	403	383	383	383	389	116	116	110	112	113	408	425	418	423	418	377	390	381	376	378	285	280	287	295	298	139	142	142	135
										491	471	472	471	469	459	483	497	514	489	500	404	384	384	384	390	116	116	110	112	113	409	426	420	424	418	378	391	382	378	380	286	281	288	296	299	140	142	142	135
										492	472	474	473	470	460	484	499	516	490	501	406	385	386	385	391	116	116	110	112	113	411	427	421	425	420	378	393	384	379	381	287	282	289	298	300	140	142	143	136
										493	474	475	475	471	462	487	501	518	492	503	408	386	387	386	392	116	116	110	113	113	412	429	423	427	421	379	395	385	380	382	288	283	290	298	301	140	143	143	136
										494	476	477	476	473	463	488	503	520	494	505	410	388	388	388	393	116	117	110	113	113	414	430	425	428	422	380	396	385	381	383	288	283	291	299	301	140	143	143	136
										495	477	479	477	475	465	490	504	522	497	507	411	390	390	389	395	116	117	110	113	113	415	432	426	430	423	381	397	386	382	385	289	284	291	300	302	141	143	143	136
										496	479	481	480	476	466	492	506	523	498	509	414	391	391	391	396	117	117	110	113	113	416	433	427	432	425	382	398	387	383	385	290	284	292	301	303	141	143	143	136
										497	480	483	481	479	467	494	508	525	500	511	414	392	392	391	397	117	117	110	113	113	417	434	429	433	427	384	399	388	385	387	292	285	293	302	304	141	144	144	136
										498	483	484	483	480	469	496	510	528	502	512	415	393	395	392	398	117	117	110	113	114	418	435	430	434	428	387	401	390	386	388	292	286	293	302	304	141	145	144	136
										499	484	487	484	482	471	499	512	529	503	513	416	394	396	393	400	117	117	110	113	114	419	437	432	435	429	388	402	391	387	389	293	286	294	303	304	141	145	145	136
										500	486	489	487	484	473	501	512	531	506	514	418	396	397	394	402	118	117	111	114	114	420	438	433	437	431	389	403	392	389	390	294	287	295	303	305	142	146	145	136
										501	487	491	489	485	474	503	515	533	506	517	419	397	398	395	403	118	117	111	114	114	422	440	435	439	433	390	404	392	390	392	294	287	295	304	306	142	146	145	137
										502	489	493	491	487	476	505	517	535	508	519	421	398	399	396	405	118	117	111	114	114	424	441	437	440	435	391	405	394	391	393	296	288	296	305	308	142	146	145	137
										503	490	494	492	489	477	506	520	537	509	521	422	399	400	397	407	118	117	111	114	114	425	442	439	441	436	393	406	394	392	394	297	289	297	305	308	142	146	145	137
										504	492	496	494	491	479	507	522	539	511	522	423	400	401	398	408	118	117	111	114	114	427	444	440	443	437	394	407	396	393	394	298	290	297	306	309	142	147	146	137
										505	495	497	496	492	480	509	523	541	514	525	424	402	403	399	409	118	117	111	114	114	429	445	442	444	439	395	409	398	394	395	299	291	298	307	310	142	147	146	138
										506	497	500	498	494	481	510	526	542	515	527	425	403	404	400	410	118	117	112	114	114	430	447	444	446	440	397	411	399	395	396	300	292	298	308	311	143	147	146	138
										507	498	502	500	496	483	511	528	544	517	530	427	405	405	402	411	118	117	111	114	115	432	447	446	447	441	398	412	400	396	398	301	293	299	308	312	143	147	146	138
										508	500	504	503	499	485	514	529	546	518	531	429	407	406	403	412	118	117	112	114	115	433	448	447	449	444	399	413	401	397	399	302	294	300	309	313	144	147	146	138
										509	503	506	505	501	487	516	531	548	520	534	431	408	408	404	414	118	117	112	114	115	434	450	449	451	444	401	414	402	399	400	303	295	301	310	313	144	147	147	138
										510	504	508	508	503	488	518	533	550	522	536	433	409	409	406	415	118	117	112	114	115	436	452	450	452	446	402	416	403	401	400	304	296	302	310	314	145	147	147	139
										511	507	509	510	505	489	519	535	552	524	538	434	411	410	407	417	118	118	112	114	115	437	453	452	453	448	404	417	405	402	402	305	296	303	311	315	145	148	147	139
										512	508	512	512	507	491	522	537	554	525	540	435	412	412	408	418	118	118	112	114	115	438	455	454	454	450	405	418	405	404	403	305	298	304	311	316	146	148	147	139
										513	510	513	514	509	493	524	539	557	527	541	437	413	413	409	420	119	118	112	114	116	439	457	456	455	451	405	419	407	405	404	306	299	305	313	316	146	148	147	139
										514	511	515	516	511	495	526	541	559	530	544	439	415	413	410	422	119	118	112	114	116	441	458	457	457	453	406	421	409	406	405	307	299	306	313	317	146	149	148	139
										515	514	516	519	512	497	527	544	560	532	545	440	416	415	412	423	119	118	112	115	116	443	459	458	459	455	407	422	410	406	406	308	300	307	315	317	147	149	148	140
										516	516	519	522	514	499	530	546	562	534	547	441	418	418	413	425	119	118	112	115	116	444	460	460	460	456	409	423	411	407	407	309	301	308	315	318	147	149	149	140
										517	519	521	524	516	501	531	547	563	536	549	443	420	419	415	427	119	119	112	115	116	444	461	462	461	458	410	424	412	408	408	310	302	309	316	319	147	150	149	140
										518	521	524	526	518	504	532	548	565	539	551	445	422	421	417	428	120	119	112	115	116	445	462	464	462	459	411	426	414	409	410	310	303	310	317	320	147	150	149	141
										519	523	526	528	521	506	533	550	567	541	552	446	424	421	418	430	120	119	113	115	116	447	463	464	465	461	413	428	416	411	410	311	304	311	318	321	148	150	150	141
										520	525	527	531	522	508	535	552	569	542	554	447	425	423	420	431	120	119	113	115	116	448	464	466	467	462	415	429	417	412	411	312	305	312	318	322	148	150	150	141
										521	527	529	532	525	510	537	554	572	544	556	448	427	424	421	432	120	120	113	115	116	450	465	467	468	463	417	430	419	412	413	312	306	313	319	323	149	150	150	142
										522	530	530	534	527	512	539	555	573	546	558	450	428	426	423	433	120	120	113	115	116	451	466	469	469	465	419	432	420	414	414	314	307	314	319	324	149	150	150	143
										523	531	532	536	529	515	540	557	575	547	560	451	429	427	424	435	120	120	113	115	116	454	467	470	470	466	420	433	421	416	415	314	308	314	321	325	150	151	151	143
										524	533	535	538	531	517	543	559	577	550	562	453	430	428	426	437	120	120	113	115	117	455	469	471	472	467	421	435	422	417	415	315	309	315	321	326	150	151	151	143
										525	535	538	540	533	518	544	560	578	552	563	454	430	430	427	438	120	120	113	115	117	456	470	472	473	469	422	437	423	418	417	316	310	316	321	327	150	151	151	143
										526	537	540	544	535	520	546	561	580	554	566	456	432	431	429	440	120	120	113	115	117	457	472	473	476	470	423	438	425	419	418	317	310	316	323	328	150	151	151	144
										527	539	541	546	538	522	549	563	582	556	567	457	434	432	430	442	120	120	113	115	117	458	473	475	477	472	425	439	426	420	419	318	311	317	324	329	150	152	152	144
										528	541	543	548	540	523	551	566	585	558	569	458	435	434	431	443	120	120	113	115	117	460	476	475	479	473	427	440	427	421	420	318	312	318	324	330	151	152	152	144
										529	543	545	550	542	526	553	569	587	560	571	460	437	435	431	444	120	120	113	115	117	461	477	476	481	474	428	442	428	422	421	319	313	318	326	331	151	153	152	145
										530	545	547	552	544	528	554	571	590	561	573	461	437	436	433	447	120	120	113	115	117	463	478	478	483	475	430	443	429	423	422	320	314	319	327	331	151	153	152	145
										531	547	549	553	545	530	556	573	591	563	575	463	439	437	435	448	120	120	113	115	117	464	480	480	484	476	431	445	430	424	423	320	314	320	328	332	152	153	152	145
										532	549	551	555	547	531	557	576	593	565	577	465	440	438	436	450	120	120	113	115	117	465	481	481	485	478	433	446	432	425	424	321	315	321	329	333	152	153	152	145
										533	551	552	557	549	532	559	578	595	567	578	466	442	440	438	452	120	121	113	115	117	467	482	482	488	480	433	447	433	427	425	322	316	321	329	334	152	153	152	145
										534	552	555	559	551	534	561	579	596	569	580	467	444	442	439	454	120	121	113	115	117	468	484	485	489	482	436	449	435	428	426	323	317	322	330	334	153	154	153	145
										535	554	556	561	552	536	563	582	598	571	582	469	445	443	441	455	120	121	114	115	118	469	485	487	491	483	437	451	436	429	428	323	318	323	331	334	153	154	153	145
										536	557	559	563	555	538	565	584	600	573	583	471	447	444	443	457	120	121	114	115	118	471	486	488	492	485	438	452	438	431	429	324	318	324	331	335	153	154	153	145
										537	558	561	566	557	540	566	587	602	575	584	472	449	446	444	459	120	121	114	116	118	472	487	490	494	487	439	454	438	432	430	325	319	325	332	336	153	154	153	145
										538	560	562	568	559	542	568	589	605	577	586	474	450	447	445	461	121	121	114	116	118	474	488	491	496	489	440	454	439	433	431	326	319	326	333	337	154	155	153	146
										539	562	565	570	560	544	570	592	608	578	589	476	452	449	447	462	121	121	114	116	118	476	490	493	498	490	441	455	441	433	433	327	320	327	334	338	154	155	153	146
										540	564	566	572	562	546	572	594	609	579	590	478	453	450	448	463	121	121	114	116	118	478	492	494	500	492	443	456	442	436	435	328	321	327	334	339	154	155	154	146
										541	566	568	574	564	548	574	596	611	581	591	480	455	451	449	465	121	121	114	116	118	479	494	495	501	494	443	457	443	437	436	329	321	328	335	340	154	156	154	147
										542	569	570	576	566	550	576	599	613	584	593	482	457	453	451	466	121	121	114	116	118	480	496	497	504	495	446	458	444	438	437	330	322	329	335	340	154	156	154	147
										543	571	573	579	568	552	577	601	614	585	596	485	459	453	453	467	121	121	114	116	118	482	497	498	505	497	447	459	445	439	439	330	323	331	336	341	155	156	154	147
										544	572	575	581	569	554	579	603	616	587	598	487	460	455	454	469	122	121	114	116	118	483	498	500	507	499	448	461	446	440	441	331	324	332	337	342	155	156	155	147
										545	574	577	583	572	556	581	605	618	590	600	488	461	457	456	470	122	121	114	116	118	486	500	501	509	500	449	462	448	442	443	331	326	332	338	342	155	156	155	147
										546	576	578	585	574	559	583	608	621	591	602	490	463	459	458	471	122	121	115	116	118	487	503	503	511	503	451	464	449	443	444	332	326	333	339	343	155	156	155	148
										547	578	581	587	576	561	586	610	624	592	604	491	464	461	459	473	122	121	115	116	118	488	504	505	512	504	452	466	450	445	445	334	327	333	341	345	156	157	155	148
										548	579	583	589	578	563	588	611	626	594	607	492	466	462	461	474	122	121	115	116	118	491	506	506	513	505	453	467	452	445	447	335	328	334	341	345	156	157	155	148
										549	582	585	591	580	566	589	612	628	595	609	493	467	464	462	476	122	121	115	116	118	492	508	508	515	506	455	468	454	447	448	336	329	335	343	345	156	157	156	148
										550	584	587	594	582	568	592	614	630	597	610	495	469	466	464	476	122	121	115	116	118	494	511	509	517	508	457	469	455	448	449	336	329	335	344	346	156	157	156	148
										551	586	589	596	584	570	594	616	633	599	612	496	470	467	466	478	123	122	115	117	118	495	512	510	518	511	458	470	457	449	451	337	330	336	345	347	156	158	156	149
										552	589	592	598	586	573	596	617	635	600	615	497	471	468	467	479	123	122	115	117	118	496	514	511	520	512	459	472	458	451	452	338	331	337	346	348	156	158	156	149
										553	592	593	600	587	575	598	620	637	602	616	498	474	470	469	480	123	122	115	117	118	498	515	513	522	514	460	473	460	452	454	339	331	338	347	349	157	158	157	149
										554	594	595	602	589	577	600	622	640	604	618	499	476	471	470	482	123	122	116	117	119	499	517	515	524	516	461	473	462	453	456	340	332	339	348	350	157	158	157	149
										555	596	598	604	592	579	602	624	643	606	620	501	478	472	471	483	123	122	116	117	119	500	517	516	526	518	463	474	463	455	457	341	332	340	349	350	157	158	157	149
										556	599	600	606	594	581	605	627	645	608	623	503	479	473	473	484	123	122	116	117	119	502	518	518	528	520	464	476	464	457	458	341	333	342	350	352	157	158	158	150
										557	600	603	608	596	584	608	628	646	610	625	505	481	475	475	485	123	122	116	117	119	503	520	520	529	522	465	478	466	458	460	342	335	343	351	353	158	158	158	150
										558	602	605	610	597	586	609	630	649	612	627	507	482	476	476	487	123	122	116	117	119	505	520	521	532	524	466	480	468	459	462	342	337	344	352	354	158	159	158	150
										559	604	608	612	599	587	611	631	651	614	630	508	484	477	477	489	123	122	116	118	119	507	523	523	533	525	468	481	469	460	463	343	337	345	353	354	158	159	159	150
										560	607	610	614	602	589	614	633	653	616	632	509	484	479	478	490	123	122	116	118	119	509	525	526	535	527	470	482	471	462	464	344	338	346	353	356	158	159	159	150
										561	609	612	615	605	591	616	635	655	618	633	510	486	481	479	492	123	122	116	118	119	510	526	527	536	530	471	484	472	464	466	345	338	347	354	357	158	159	159	150
										562	610	615	617	607	594	617	637	657	620	635	512	488	483	481	494	123	122	116	118	120	512	528	528	538	532	472	485	473	465	467	347	339	348	356	357	159	159	159	150
										563	611	617	619	609	596	619	638	660	621	637	514	490	485	482	496	123	122	116	118	120	513	530	529	540	533	473	486	476	467	468	349	340	348	356	358	159	160	160	150
										564	613	619	621	611	598	621	640	662	622	639	516	491	486	484	498	123	122	116	118	120	515	532	531	542	535	474	487	477	469	469	349	341	350	357	360	159	160	161	150
										565	615	622	623	613	599	622	642	664	625	641	518	493	488	486	500	124	123	116	119	120	517	533	534	544	537	476	489	479	470	470	350	342	351	358	361	159	160	161	151
										566	618	624	626	616	600	625	644	665	627	643	519	495	489	487	501	124	123	117	119	120	520	535	536	545	540	477	490	480	471	471	351	343	352	359	362	160	160	161	151
										567	621	626	629	620	603	626	646	667	629	646	520	496	490	489	503	124	123	116	119	120	522	537	538	548	542	479	493	481	472	473	352	343	352	359	363	160	161	161	151
										568	625	628	631	622	604	627	648	669	631	649	522	498	492	491	505	124	123	117	119	120	524	538	540	550	543	480	495	483	473	474	353	344	353	360	365	160	161	161	152
										569	627	630	633	625	606	629	649	671	633	652	523	499	493	493	506	124	123	117	119	120	525	539	541	552	545	482	497	484	475	475	354	344	354	362	365	161	161	162	152
										570	629	632	637	627	609	632	652	675	635	655	524	501	494	494	508	124	123	117	119	120	527	541	542	554	547	482	499	486	476	477	355	345	354	362	366	161	162	162	152
										571	631	634	638	629	611	634	654	676	638	657	526	502	496	495	509	124	123	117	119	120	528	543	544	556	549	483	500	488	478	478	356	345	355	364	367	161	162	162	153
										572	634	637	640	630	614	636	657	679	641	659	527	504	498	497	511	124	123	117	119	120	530	545	546	557	550	485	501	490	479	479	357	346	356	365	369	162	162	162	153
										573	637	639	643	633	616	638	659	682	642	661	529	505	500	499	512	124	124	117	120	121	531	547	549	559	551	487	503	491	481	481	358	347	357	366	370	162	162	162	153
										574	639	642	646	635	618	641	661	684	644	662	531	507	501	501	514	124	123	117	120	121	533	549	550	560	554	489	504	493	483	483	359	347	359	367	371	162	163	163	153
										575	641	644	649	637	621	642	664	687	646	664	533	509	502	502	515	125	124	117	120	121	535	550	552	563	555	491	506	495	484	485	359	348	359	368	372	163	163	163	154
										576	644	647	651	639	622	645	667	689	648	666	534	510	504	504	516	125	124	117	120	121	536	551	553	564	555	492	508	496	486	487	361	349	360	368	373	163	164	163	154
										577	646	648	652	642	624	647	669	692	650	669	536	511	506	505	518	125	124	117	120	121	537	552	555	565	557	494	510	498	488	488	362	350	361	369	373	163	164	164	154
										578	647	650	655	645	627	650	672	694	653	671	537	513	507	507	520	125	124	117	120	121	539	554	557	567	558	495	511	499	489	490	363	351	363	370	374	164	164	164	154
										579	650	653	658	647	629	652	673	697	655	674	539	515	508	509	522	125	124	117	120	121	541	556	559	568	560	497	513	500	490	492	364	352	363	371	376	164	165	164	154
										580	651	654	660	650	631	655	676	698	658	676	541	517	511	511	523	125	124	117	120	121	542	558	561	570	563	499	515	502	493	494	365	353	365	372	378	164	165	165	154
										581	653	658	663	653	633	657	677	701	660	678	543	520	512	513	525	125	124	118	120	121	545	559	562	571	565	500	517	504	494	496	365	355	365	374	379	164	165	165	155
										582	655	660	665	655	636	659	680	704	662	680	544	521	513	515	527	125	124	118	120	121	547	561	563	573	566	502	518	506	495	497	366	357	366	375	380	164	165	166	155
										583	657	663	667	658	638	660	682	706	665	682	545	523	514	517	528	126	124	118	121	121	549	563	565	574	568	503	520	508	497	499	367	358	368	376	381	164	165	166	155
										584	659	666	669	661	640	662	685	709	666	684	548	525	516	519	529	126	124	118	121	121	552	565	567	576	571	505	522	510	499	500	368	359	370	377	382	165	166	166	155
										585	661	669	671	663	643	666	687	711	669	685	550	527	517	522	531	126	124	118	121	121	552	567	569	578	573	506	524	512	501	502	369	360	370	378	383	165	167	166	155
										586	664	671	675	666	645	668	691	713	672	688	552	529	519	524	533	126	125	118	121	122	555	569	571	580	574	507	526	514	503	504	370	361	371	379	384	165	167	166	156
										587	668	673	677	670	647	671	693	715	674	689	553	530	521	526	534	126	125	119	121	122	556	571	573	581	576	508	527	516	505	506	371	362	372	380	385	165	167	167	156
										588	670	676	680	672	649	673	696	718	676	692	556	533	523	528	537	126	125	119	121	122	557	572	575	583	577	510	529	518	506	508	372	363	374	381	386	165	167	167	156
										589	672	678	681	674	652	675	698	721	677	694	557	535	525	530	538	126	125	119	121	122	559	573	576	584	579	513	531	520	507	510	374	363	375	381	387	165	167	167	156
										590	674	681	684	676	654	678	701	723	680	696	559	536	526	532	539	127	125	119	121	122	561	576	578	587	581	514	533	521	508	511	374	365	375	383	389	165	167	167	156
										591	677	683	686	679	657	681	704	726	682	699	561	538	529	533	541	127	125	119	121	122	563	578	579	588	582	516	534	522	510	513	375	366	377	383	389	166	168	168	157
										592	680	686	688	682	659	682	705	729	685	702	563	539	531	534	543	127	125	119	121	122	565	581	580	591	583	518	536	524	511	514	377	367	378	384	390	166	168	168	157
										593	682	688	690	684	662	685	708	730	687	704	565	540	533	535	544	127	125	119	121	123	567	582	582	593	585	519	537	525	513	516	377	369	379	385	391	166	168	168	158
										594	684	690	692	687	664	688	710	733	691	706	567	541	536	537	547	127	125	120	121	123	568	584	585	594	586	521	539	528	514	518	378	370	380	386	392	166	168	168	158
										595	687	693	696	688	667	690	712	736	693	708	569	543	538	539	548	128	125	120	121	123	570	586	587	595	588	523	541	529	515	520	379	371	380	387	393	167	168	168	158
										596	689	696	699	691	669	692	715	738	696	711	571	544	540	541	549	128	125	120	121	123	572	587	589	596	589	525	543	531	517	521	379	372	381	389	394	166	169	168	158
										597	691	698	701	693	671	695	717	741	699	713	573	546	543	543	551	128	126	120	121	123	574	590	592	598	591	527	544	532	519	524	381	373	382	390	394	167	169	168	159
										598	693	700	704	696	674	697	720	744	702	716	575	548	545	545	553	128	126	120	121	123	576	590	594	599	593	529	546	535	521	526	382	374	382	391	396	167	169	169	159
										599	695	703	706	699	676	699	723	747	705	717	577	550	546	547	555	128	126	120	122	123	578	593	595	601	595	530	548	536	523	528	383	375	384	392	397	167	169	169	159
										600	697	706	709	703	679	702	725	749	707	719	580	551	547	550	556	128	126	120	122	123	579	595	597	602	597	533	550	537	524	529	385	375	385	394	398	168	169	169	159
										601	699	708	711	705	683	703	727	752	710	723	582	553	548	551	558	128	126	120	122	124	581	597	599	604	599	534	551	539	526	530	385	376	386	395	399	168	169	169	159
										602	701	711	713	708	686	706	730	755	712	726	583	555	550	553	559	129	126	120	122	124	583	599	602	606	600	536	554	541	528	531	386	376	387	396	400	168	169	170	160
										603	704	713	715	710	688	708	733	758	714	728	585	557	552	555	560	129	126	120	121	124	584	601	604	609	602	538	557	544	530	532	388	377	388	398	402	169	170	170	159
										604	707	715	718	714	690	711	735	761	716	731	586	558	554	557	562	129	126	120	122	124	586	604	605	611	603	540	558	545	531	534	389	378	389	400	403	169	170	170	160
										605	709	718	721	716	693	713	738	763	720	733	588	560	556	559	563	129	127	120	122	124	589	606	607	613	605	542	561	546	533	536	391	379	389	401	404	170	170	170	160
										606	712	721	723	719	696	715	740	767	723	735	590	562	558	561	565	129	127	120	122	124	591	608	608	615	606	544	563	547	534	538	392	379	391	402	405	170	170	171	161
										607	715	724	726	722	698	717	742	770	725	738	591	564	559	563	567	129	127	120	122	124	592	610	610	617	608	545	565	548	535	540	394	380	391	403	407	171	170	171	161
										608	718	727	729	724	701	719	744	772	727	740	594	566	562	565	568	129	127	120	122	124	595	613	610	619	610	547	566	550	537	543	394	381	393	404	407	171	171	171	162
										609	720	729	731	727	704	722	746	775	730	742	595	568	563	566	570	130	127	121	122	124	597	614	613	622	613	548	568	552	540	544	395	383	393	404	408	171	171	171	162
										610	723	731	734	730	706	725	749	778	733	744	597	570	565	569	572	130	127	121	122	124	599	616	615	623	614	550	571	553	542	545	397	384	394	405	409	171	172	172	162
										611	727	734	737	732	708	727	752	781	735	747	599	571	566	571	574	130	127	121	122	124	601	618	618	626	617	552	573	556	544	547	397	385	395	406	410	172	172	171	163
										612	731	737	738	734	711	729	754	783	738	751	601	573	568	572	576	130	127	121	122	125	603	620	619	628	618	554	575	557	546	549	399	386	397	408	411	172	172	172	163
										613	733	740	742	736	714	732	756	787	740	754	603	575	570	575	578	130	127	121	122	125	604	622	621	631	621	555	577	559	548	551	401	387	397	409	412	173	173	172	163
										614	737	742	745	738	717	734	759	790	743	756	606	577	573	577	580	130	128	121	122	125	606	623	624	633	623	557	579	560	550	553	401	387	398	409	413	174	173	172	163
										615	738	746	748	741	720	737	762	793	746	759	607	579	576	580	582	131	128	121	123	125	608	626	625	635	625	558	581	562	552	555	402	388	398	410	415	174	173	172	163
										616	740	748	750	744	723	740	766	796	749	761	608	581	578	581	585	131	128	122	123	125	610	628	627	638	628	559	582	564	554	556	403	389	400	411	416	174	174	173	163
										617	742	751	753	747	725	743	768	799	752	764	611	583	580	582	586	131	128	122	123	125	612	630	630	640	630	561	585	566	556	559	404	390	401	413	417	175	174	173	164
										618	744	753	755	749	728	746	770	802	756	768	613	586	582	585	588	131	128	122	123	125	615	634	631	642	632	561	586	568	559	560	404	391	402	414	418	175	174	173	164
										619	746	756	758	751	730	749	773	804	757	769	615	587	584	586	590	132	128	122	123	125	618	636	632	645	635	563	588	572	562	562	405	393	403	415	419	175	174	173	164
										620	748	759	761	754	733	751	775	807	760	772	618	589	586	589	593	132	129	123	123	125	619	638	635	646	637	564	589	573	564	565	406	394	403	417	419	175	175	174	164
										621	751	762	764	757	735	754	779	811	763	775	620	590	587	590	595	132	129	123	123	125	622	641	637	649	639	566	591	574	566	567	407	395	405	418	420	176	175	174	165
										622	752	765	766	761	738	756	781	813	765	777	622	592	590	593	596	132	129	123	124	125	623	642	639	651	642	569	594	576	567	568	409	396	406	419	422	176	176	175	165
										623	755	767	769	763	741	759	784	817	767	780	624	595	592	595	598	133	129	123	124	126	624	644	642	653	644	571	596	578	568	571	410	396	407	421	423	176	176	175	165
										624	759	770	772	765	743	761	787	819	770	783	625	596	594	597	599	133	129	123	124	126	627	646	643	654	646	573	598	580	569	572	411	397	409	422	424	177	176	176	166
										625	762	773	774	767	746	763	790	823	773	785	627	599	596	599	601	133	129	123	124	126	629	648	645	657	648	574	599	582	571	574	412	399	410	423	425	177	178	176	166
										626	765	775	776	771	748	766	794	826	775	788	629	601	598	600	604	133	129	123	124	126	632	651	646	659	651	576	601	585	573	575	413	400	411	424	426	177	178	176	166
										627	768	778	778	774	750	768	797	829	779	791	631	603	599	602	607	133	129	124	124	126	634	653	649	659	653	578	603	586	575	577	413	401	412	425	427	177	178	176	166
										628	771	781	781	777	753	771	800	832	784	793	633	605	601	604	608	133	129	124	125	126	636	656	652	661	655	581	606	589	577	579	415	402	413	427	427	177	178	176	167
										629	774	784	785	779	756	773	803	835	787	795	635	607	604	607	610	133	129	124	125	126	638	658	654	664	657	583	608	590	580	581	416	403	414	427	429	178	178	177	167
										630	776	787	786	782	758	776	805	838	790	798	637	609	606	609	612	134	129	124	125	126	640	660	655	666	659	584	609	593	581	583	417	404	415	429	430	178	178	177	167
										631	779	789	789	784	761	779	808	841	792	800	639	610	609	610	616	134	129	124	125	126	642	663	658	668	661	586	611	594	583	585	418	404	417	431	432	178	179	178	167
										632	782	791	792	787	764	782	811	845	795	804	642	612	611	612	618	134	130	124	125	126	644	665	659	670	662	587	612	595	585	588	419	405	418	432	433	179	179	178	168
										633	784	793	794	791	766	786	815	849	798	807	643	615	613	614	621	134	130	124	125	127	646	667	663	671	665	588	615	597	587	589	420	406	419	433	435	179	180	178	168
										634	787	796	798	793	769	789	818	852	801	810	646	616	616	617	623	134	130	125	126	127	647	669	665	673	667	590	617	599	588	591	421	407	420	433	436	179	180	178	169
										635	788	799	801	797	772	792	822	855	805	813	651	618	618	619	625	134	130	125	126	127	650	672	666	675	669	591	619	602	590	592	422	409	422	435	438	180	181	178	169
										636	791	801	803	800	775	795	826	858	808	816	653	621	620	621	627	134	130	125	126	127	651	674	668	676	671	593	622	604	592	593	423	410	423	437	438	180	181	178	169
										637	794	805	806	802	779	798	829	861	811	819	656	623	622	624	629	135	130	125	126	127	654	677	671	679	673	595	623	607	593	595	425	412	424	438	439	180	181	179	170
										638	797	808	808	805	782	801	832	865	815	822	658	625	624	626	631	135	131	125	126	127	656	678	673	681	675	597	625	609	595	596	425	414	425	439	440	180	182	179	170
										639	800	812	811	808	785	804	835	868	819	826	661	627	627	628	633	135	131	125	127	127	657	681	676	683	677	599	626	610	597	598	427	414	426	441	441	181	182	179	170
										640	803	815	813	811	787	808	839	871	823	829	662	629	629	629	635	135	131	125	127	127	660	683	679	685	678	601	628	611	599	599	428	415	427	443	442	181	183	180	170
										641	807	817	816	814	790	812	842	875	827	832	664	631	631	632	636	135	132	125	127	127	662	686	682	686	680	603	630	613	600	601	430	417	430	444	443	181	183	181	170
										642	809	819	819	817	793	815	845	879	829	836	666	633	633	635	639	136	132	126	127	127	664	689	684	690	681	605	632	615	603	603	430	417	431	446	444	181	184	181	171
										643	813	822	822	820	796	818	847	881	833	839	669	635	636	637	641	136	132	126	127	127	667	691	684	692	684	606	634	617	604	606	431	419	432	447	446	182	185	182	171
										644	815	824	826	823	799	821	850	883	837	842	672	637	639	639	643	136	132	126	127	127	669	695	686	695	686	608	635	620	606	607	432	420	433	449	447	182	185	182	171
										645	818	826	828	826	802	824	853	886	840	845	674	640	641	641	646	137	132	126	127	128	670	698	689	697	689	611	636	622	608	608	433	421	434	450	449	183	185	182	172
										646	821	829	832	828	806	827	857	888	843	848	676	641	643	644	648	137	133	127	127	128	672	699	692	700	691	614	638	624	610	609	433	422	436	451	450	183	185	183	172
										647	824	831	835	831	808	830	861	891	846	853	678	644	644	646	650	137	133	127	127	128	675	701	694	703	694	616	641	626	612	612	435	423	437	451	451	183	186	183	172
										648	827	835	838	834	811	835	864	894	850	858	680	645	647	648	651	137	133	127	127	128	678	703	698	706	697	618	642	629	614	614	436	425	438	452	451	184	186	183	173
										649	832	838	841	837	814	838	868	897	853	861	682	648	650	650	653	138	134	127	128	128	680	705	701	709	699	620	644	631	616	617	438	426	438	454	452	184	186	184	173
										650	835	840	844	840	817	841	870	900	855	864	685	650	653	652	655	138	134	127	128	128	682	707	703	713	701	621	645	632	619	619	439	427	439	455	454	185	187	184	173
										651	838	843	847	843	819	845	873	903	858	868	687	652	655	654	657	138	134	127	128	129	684	709	706	715	703	623	647	635	621	621	440	428	440	456	455	185	187	185	174
										652	841	846	850	846	822	848	876	907	862	871	688	655	658	656	660	138	134	127	128	129	686	711	709	717	705	626	649	637	623	624	441	429	442	458	456	185	187	186	174
										653	844	848	852	849	825	851	879	910	865	873	690	656	661	658	662	139	134	128	128	129	689	712	711	719	708	628	652	639	626	626	442	430	442	458	457	186	188	186	174
										654	847	852	855	851	828	854	882	914	868	876	693	659	662	659	665	139	134	128	128	129	691	715	713	722	710	630	654	643	628	628	443	432	443	458	459	186	188	186	174
										655	850	856	859	854	832	858	886	918	871	878	696	662	664	662	667	139	134	128	128	129	694	717	716	724	712	632	655	644	630	631	445	433	444	459	460	186	189	187	175
										656	852	859	863	857	836	861	889	921	874	883	699	664	666	664	670	139	134	128	129	129	696	719	718	727	714	634	657	644	631	632	446	435	446	462	461	187	189	187	176
										657	855	862	867	860	839	864	892	925	877	886	701	667	668	666	673	139	134	128	129	129	697	721	721	729	717	636	659	646	632	633	448	436	447	463	463	187	189	188	176
										658	859	864	871	862	842	868	896	928	881	890	704	668	670	669	675	139	135	128	129	129	700	724	723	731	719	639	661	647	635	635	450	436	448	465	464	188	189	188	176
										659	861	867	873	866	845	872	898	931	884	893	706	670	672	671	678	140	135	128	129	129	702	726	725	734	721	642	662	650	638	638	451	438	449	466	465	188	190	189	176
										660	865	871	875	868	848	876	901	935	887	897	709	672	674	672	680	140	135	128	129	130	704	728	727	736	724	643	665	651	640	640	453	438	451	467	466	188	190	189	177
										661	868	874	879	872	851	880	906	940	890	900	711	674	675	675	682	140	135	128	130	130	707	730	730	739	726	645	667	653	642	642	454	439	452	468	467	189	190	189	177
										662	872	877	882	874	854	883	909	943	893	904	714	677	677	676	685	140	135	128	130	130	709	733	733	741	728	647	669	654	644	644	456	441	453	469	469	189	191	190	178
										663	875	880	885	878	856	886	911	946	896	908	717	679	679	678	687	140	136	129	130	130	710	735	735	743	731	648	671	656	646	645	457	442	454	470	470	189	191	190	178
										664	876	883	890	881	859	889	915	949	899	911	719	681	682	681	689	141	136	129	130	130	712	738	737	746	734	651	674	658	648	647	459	444	455	471	471	189	192	190	179
										665	880	887	893	884	862	893	917	952	902	915	721	683	683	684	692	141	136	129	130	131	714	740	741	747	736	653	676	659	649	650	460	446	456	473	472	189	192	190	179
										666	882	889	897	886	866	895	920	956	906	919	724	686	685	686	695	141	136	129	131	131	716	742	742	750	738	655	678	661	651	652	462	447	458	474	472	190	193	191	180
										667	886	893	899	891	868	899	924	960	910	923	727	688	688	689	699	141	136	129	131	131	718	744	745	752	741	657	680	664	653	655	464	449	459	475	474	190	193	191	180
										668	889	895	903	895	872	904	928	964	912	926	729	690	690	691	702	141	136	129	131	131	721	746	747	754	742	659	683	666	656	657	465	450	460	476	476	191	193	191	180
										669	894	899	907	898	874	907	930	967	915	930	732	692	692	693	704	141	136	129	131	132	723	749	748	756	745	661	685	668	658	659	466	451	461	478	477	191	193	192	181
										670	896	903	911	902	877	909	933	971	918	934	735	694	695	694	706	141	136	130	131	132	726	752	750	758	748	662	687	669	660	661	466	453	462	479	478	192	194	193	181
										671	900	907	913	905	880	913	937	974	921	936	738	697	697	697	710	141	137	130	131	132	727	755	753	761	749	664	690	672	662	662	467	454	463	481	479	192	195	193	181
										672	903	909	917	909	884	916	941	977	924	939	740	698	699	699	712	141	137	130	132	132	730	757	757	763	752	667	693	674	665	665	468	456	464	483	479	192	195	193	182
										673	908	912	921	912	888	920	943	981	928	944	742	701	702	702	715	142	137	130	132	132	732	759	759	766	754	669	695	675	667	668	469	457	465	484	480	192	195	194	182
										674	911	916	924	915	891	923	947	985	932	947	746	703	704	705	718	142	137	130	132	133	735	761	762	769	757	670	697	678	669	670	471	458	466	485	481	193	196	194	183
										675	916	919	927	918	894	926	950	988	935	951	747	706	707	708	721	142	137	130	132	133	739	763	765	772	759	672	700	680	672	673	472	460	468	486	482	193	197	194	184
										676	919	922	931	922	897	929	953	991	938	954	751	708	709	710	723	143	137	131	133	133	740	766	767	775	762	674	701	682	674	675	473	461	469	487	483	193	198	194	184
										677	922	925	934	927	900	933	957	993	941	957	753	710	711	712	727	143	138	131	133	133	743	769	770	778	764	676	702	686	675	676	474	463	471	488	484	194	198	195	184
										678	926	927	937	930	905	937	960	996	944	960	755	712	713	714	729	143	138	131	133	134	746	771	771	781	767	678	704	688	677	678	475	464	472	489	485	194	198	195	185
										679	929	930	940	932	907	940	964	1000	948	964	758	714	715	717	730	143	138	131	133	134	748	774	774	783	771	681	706	690	679	680	476	465	474	491	487	195	198	196	186
										680	933	932	944	934	910	943	968	1004	951	969	761	716	717	719	734	143	139	132	133	134	751	776	777	786	773	682	707	693	681	682	478	466	475	492	488	195	199	197	186
										681	937	936	948	938	913	947	973	1009	955	972	763	719	721	721	737	144	139	132	133	134	754	778	779	788	775	684	709	695	682	685	480	467	476	493	491	195	199	197	187
										682	941	941	952	941	916	952	976	1012	959	976	765	721	724	723	740	144	139	132	133	135	757	781	783	789	779	686	711	697	684	688	481	469	479	494	492	195	199	197	188
										683	944	943	957	943	920	956	981	1014	962	980	768	724	727	725	743	144	139	132	133	135	759	784	786	791	781	688	714	698	688	691	482	470	481	495	493	196	200	197	189
										684	948	947	961	946	924	959	983	1017	965	983	771	726	729	727	746	144	139	132	133	134	761	787	788	794	784	691	716	701	690	693	484	472	483	497	494	197	200	197	189
										685	953	951	965	950	928	962	987	1020	969	987	773	728	732	728	748	145	139	132	133	135	764	790	790	796	786	694	717	703	692	696	486	473	484	499	495	198	201	198	189
										686	957	955	967	953	931	965	991	1023	974	991	776	730	734	730	750	145	140	132	133	135	765	791	792	797	789	696	720	706	695	698	487	475	485	501	497	198	201	198	189
										687	960	958	971	956	934	968	995	1027	977	996	779	732	737	732	753	145	140	132	133	135	768	796	795	801	791	699	723	708	697	700	489	476	487	504	499	199	203	199	189
										688	964	961	975	960	938	972	1000	1032	981	998	780	734	739	735	756	145	140	132	134	135	771	798	798	805	794	702	725	710	698	702	490	478	488	505	500	199	203	199	190
										689	968	964	979	965	941	975	1004	1035	984	1003	783	736	741	737	758	145	140	132	134	135	773	801	801	807	796	704	729	712	700	704	491	479	489	507	501	199	203	199	190
										690	971	967	984	969	945	979	1007	1038	988	1008	785	739	744	739	761	145	140	133	134	135	776	802	803	811	798	707	731	714	702	707	493	480	491	508	503	199	204	200	191
										691	976	971	989	973	948	982	1010	1041	993	1011	789	741	746	742	763	146	141	133	134	135	778	805	805	813	801	710	733	716	703	708	495	482	492	510	504	200	204	200	191
										692	979	976	992	977	951	984	1014	1045	996	1014	791	744	749	744	764	146	141	133	135	136	781	808	807	816	804	712	735	717	705	712	496	484	493	512	506	200	205	201	192
										693	983	978	995	980	955	988	1017	1049	1000	1018	793	747	751	747	767	146	141	133	135	136	783	810	809	819	807	714	738	719	709	715	497	486	495	514	507	200	205	201	192
										694	988	982	998	983	959	991	1020	1052	1003	1022	796	749	753	749	770	146	142	133	135	136	785	812	811	821	809	716	741	722	711	717	499	487	496	516	508	200	206	202	193
										695	992	986	1002	987	963	994	1022	1057	1007	1026	800	751	756	752	772	147	142	133	135	136	788	814	813	823	812	718	743	725	713	719	500	488	497	517	509	201	206	202	193
										696	995	990	1004	991	966	998	1026	1061	1010	1029	803	753	758	754	774	147	142	133	135	136	790	817	816	825	815	721	744	727	715	721	502	490	498	518	510	201	206	203	193
										697	999	993	1007	996	970	1002	1030	1064	1013	1034	805	756	760	756	776	148	142	134	135	137	793	821	819	827	817	723	747	729	717	723	504	491	501	520	512	201	207	203	193
										698	1002	997	1010	1000	974	1006	1033	1068	1017	1038	808	758	761	759	780	148	142	134	135	137	796	823	822	829	819	725	749	731	719	725	505	492	502	521	514	202	207	204	193
										699	1006	1001	1014	1004	977	1009	1037	1072	1021	1041	811	761	764	762	783	148	143	134	136	137	799	827	826	832	822	728	752	734	720	727	507	494	503	521	515	202	208	204	193
										700	1010	1006	1017	1007	980	1012	1040	1075	1025	1046	814	764	766	764	786	148	143	134	136	137	801	830	827	836	825	731	753	736	723	730	508	496	504	524	517	203	208	204	193
										701	1014	1010	1021	1011	984	1016	1046	1080	1028	1050	816	767	768	765	788	148	143	134	136	137	804	832	830	839	828	733	756	738	725	733	510	497	505	526	518	203	209	205	193
										702	1018	1014	1025	1013	986	1019	1049	1084	1031	1052	819	769	771	767	791	148	143	134	137	137	806	834	834	842	830	735	759	741	728	735	511	499	506	527	519	203	209	206	194
										703	1022	1017	1030	1017	989	1022	1053	1088	1036	1055	823	771	775	770	793	148	143	134	137	138	810	836	837	845	834	737	761	743	730	737	513	500	507	528	520	204	209	206	194
										704	1025	1021	1033	1020	993	1025	1057	1092	1039	1059	826	774	777	772	796	148	143	135	137	138	813	839	840	847	837	738	763	746	733	739	515	502	509	530	522	204	209	207	194
										705	1028	1024	1036	1024	995	1029	1060	1095	1042	1062	828	777	779	774	798	148	143	134	137	138	816	842	842	851	840	740	765	748	735	741	516	502	510	530	523	204	209	208	195
										706	1031	1028	1040	1029	999	1033	1065	1100	1046	1065	831	779	782	776	801	148	143	135	137	138	819	844	846	854	844	742	769	751	739	744	518	505	512	532	524	204	210	208	195
										707	1035	1031	1044	1032	1002	1037	1071	1104	1049	1069	834	782	785	778	802	149	143	135	137	138	821	846	848	858	846	744	771	754	741	746	520	506	514	532	527	205	210	208	196
										708	1038	1034	1048	1036	1006	1041	1074	1107	1053	1073	836	785	787	781	805	149	144	135	138	138	823	847	851	861	849	746	774	757	742	749	522	507	515	533	528	206	211	209	197
										709	1042	1037	1051	1039	1009	1044	1080	1111	1057	1076	838	787	789	783	808	149	144	135	138	138	825	851	853	864	852	748	776	761	743	751	523	508	517	534	529	206	212	209	198
										710	1046	1041	1055	1042	1014	1048	1084	1116	1059	1080	841	790	792	786	809	149	144	135	138	138	830	854	855	868	855	751	778	763	745	754	524	509	519	536	531	206	213	210	198
										711	1049	1045	1059	1046	1019	1050	1088	1121	1062	1085	843	793	795	789	812	150	144	135	138	138	831	856	858	870	857	752	780	765	747	757	525	511	520	537	532	207	213	210	198
										712	1053	1049	1062	1051	1021	1054	1091	1125	1065	1088	845	796	799	792	815	149	144	135	139	139	834	859	860	873	860	754	783	767	750	759	527	513	522	538	534	208	213	210	198
										713	1057	1053	1067	1056	1025	1056	1095	1128	1069	1091	848	798	801	794	818	150	145	135	139	139	836	861	863	876	863	757	785	770	752	760	529	514	522	539	535	208	214	211	199
										714	1061	1057	1071	1061	1029	1060	1099	1132	1072	1094	851	801	803	797	821	150	145	135	139	139	839	864	866	879	865	760	787	772	754	762	530	515	523	540	537	208	214	211	199
										715	1064	1062	1075	1066	1034	1063	1102	1136	1074	1097	854	804	805	801	824	150	146	135	139	139	842	866	869	881	868	761	789	774	756	763	531	517	525	541	538	209	214	212	200
										716	1068	1066	1079	1069	1039	1066	1105	1141	1077	1100	857	807	808	804	827	150	146	135	139	140	845	870	871	883	872	764	792	777	758	765	533	518	527	542	539	210	214	213	200
										717	1073	1071	1082	1073	1042	1069	1109	1146	1081	1105	860	809	810	807	830	150	146	135	139	140	848	873	874	886	875	765	795	780	761	768	534	520	528	544	541	210	215	213	200
										718	1076	1074	1087	1077	1045	1072	1113	1150	1085	1107	862	813	813	810	833	151	147	136	139	140	851	876	877	890	878	769	797	782	763	770	535	521	530	545	543	210	215	214	200
										719	1080	1078	1090	1080	1049	1075	1117	1154	1088	1111	865	815	816	813	835	151	147	136	139	140	853	879	880	892	881	772	800	785	766	772	537	523	530	546	544	210	216	214	200
										720	1084	1082	1095	1083	1054	1079	1120	1158	1091	1114	869	819	819	816	838	151	147	136	140	140	856	882	883	895	884	775	803	787	768	774	540	525	531	547	546	211	216	214	201
										721	1088	1087	1100	1086	1057	1081	1124	1161	1095	1116	872	823	822	818	841	151	147	136	140	140	859	885	885	898	887	778	805	789	771	777	541	526	533	548	547	212	217	215	201
										722	1091	1092	1104	1090	1060	1084	1127	1164	1099	1120	875	826	825	821	843	151	147	136	140	140	861	888	888	902	890	781	808	793	773	779	542	526	535	549	548	213	217	215	202
										723	1096	1095	1107	1094	1064	1088	1131	1168	1101	1124	879	829	827	823	846	152	147	136	140	140	864	891	891	904	894	783	811	794	776	781	543	528	536	551	550	214	217	215	202
										724	1099	1100	1111	1099	1067	1092	1134	1171	1105	1128	882	833	830	826	848	152	147	136	140	141	867	892	894	908	897	786	813	797	778	783	545	529	538	553	552	215	218	215	203
										725	1104	1104	1116	1103	1071	1096	1138	1175	1108	1132	885	834	833	829	851	152	147	136	140	141	870	895	897	912	901	788	815	800	781	785	547	530	539	556	553	216	218	216	203
										726	1107	1108	1120	1109	1075	1099	1143	1179	1111	1136	887	836	836	832	854	153	147	137	140	141	873	897	901	914	903	790	816	802	783	787	548	531	541	557	555	217	219	216	203
										727	1111	1112	1125	1113	1079	1103	1147	1182	1115	1139	889	839	839	834	858	153	148	137	140	141	877	901	905	918	906	793	819	805	785	790	549	533	542	559	556	218	220	216	204
										728	1114	1115	1129	1116	1083	1109	1151	1186	1118	1143	892	842	842	837	860	153	148	137	140	141	878	903	908	921	910	795	822	807	788	793	551	534	544	559	557	218	220	217	204
										729	1118	1119	1134	1120	1087	1113	1155	1190	1122	1147	895	844	846	839	862	153	148	137	140	141	881	906	912	924	913	798	825	810	790	796	552	536	544	561	559	218	220	217	205
										730	1121	1123	1137	1124	1090	1115	1161	1193	1126	1152	896	848	850	841	866	154	149	137	140	141	883	908	914	926	917	800	828	813	794	799	553	537	546	562	562	219	221	217	205
										731	1126	1127	1141	1129	1095	1118	1165	1198	1129	1155	898	850	851	844	869	154	149	138	140	141	886	910	918	927	920	803	831	816	796	800	554	539	547	563	563	219	221	218	206
										732	1131	1132	1145	1132	1098	1122	1169	1202	1132	1159	901	853	853	846	872	154	149	138	141	142	889	912	921	930	923	806	833	817	799	803	556	540	549	565	565	220	221	218	206
										733	1135	1137	1149	1136	1102	1126	1174	1206	1136	1162	904	856	856	848	875	154	149	138	141	142	891	916	924	934	926	808	835	820	802	805	557	541	551	567	565	220	222	219	206
										734	1139	1142	1152	1139	1104	1130	1178	1209	1139	1166	907	859	858	851	877	154	149	138	141	142	894	918	927	936	930	810	837	823	805	808	558	543	552	568	567	221	222	219	206
										735	1142	1148	1157	1142	1109	1133	1182	1214	1142	1171	910	862	861	854	880	154	149	138	141	142	897	922	930	939	933	811	840	825	807	812	559	545	554	570	569	221	223	220	206
										736	1146	1151	1161	1147	1113	1136	1186	1219	1146	1175	913	864	863	856	883	154	150	138	142	143	900	925	933	941	936	814	843	828	809	814	560	547	556	572	571	222	223	220	207
										737	1151	1154	1165	1151	1117	1140	1190	1225	1150	1179	915	866	866	860	885	154	150	139	142	143	904	928	936	945	940	817	845	830	812	816	562	548	557	573	573	222	224	221	207
										738	1157	1159	1169	1155	1122	1144	1193	1229	1155	1183	918	869	868	863	888	154	149	139	142	143	907	932	939	948	942	820	848	832	815	820	564	550	559	575	574	223	225	221	208
										739	1162	1164	1173	1160	1128	1148	1198	1234	1158	1187	921	871	871	866	891	154	150	139	142	143	909	934	942	951	944	822	850	835	819	822	566	551	562	577	576	224	225	222	208
										740	1165	1167	1178	1164	1132	1151	1202	1238	1162	1191	925	874	873	869	894	155	150	139	142	143	911	936	945	955	947	825	852	839	822	825	566	552	563	579	577	224	225	222	209
										741	1169	1171	1182	1169	1135	1155	1206	1243	1168	1194	930	877	875	872	897	155	150	139	142	144	913	941	947	958	949	828	855	841	824	827	568	554	564	581	579	224	225	223	209
										742	1172	1176	1186	1173	1139	1160	1212	1247	1172	1199	933	880	878	874	900	155	150	139	143	144	916	944	951	961	952	831	858	844	827	829	571	555	567	583	581	225	226	223	210
										743	1177	1180	1190	1177	1143	1165	1215	1252	1176	1203	936	883	883	878	902	155	150	139	143	144	918	947	953	964	955	834	860	847	830	832	572	556	568	584	584	225	226	224	210
										744	1180	1186	1194	1182	1148	1169	1219	1256	1181	1206	938	886	885	881	905	155	150	140	143	144	922	951	956	966	958	837	862	850	832	835	574	558	570	586	586	226	227	224	210
										745	1184	1189	1198	1188	1153	1172	1223	1259	1186	1211	941	890	887	884	908	155	151	140	144	144	925	953	959	970	961	837	866	852	835	838	576	560	572	588	588	227	227	225	211
										746	1189	1194	1202	1192	1157	1176	1227	1264	1189	1215	944	893	891	887	910	155	151	140	144	145	928	955	962	973	964	841	869	855	837	839	578	562	573	590	590	227	227	225	211
										747	1194	1198	1206	1197	1161	1180	1232	1267	1194	1220	946	897	893	890	912	156	151	140	144	145	933	958	965	977	967	844	871	858	841	842	580	563	575	592	591	227	228	226	211
										748	1198	1202	1211	1200	1166	1184	1237	1271	1197	1224	949	900	896	893	916	156	152	141	144	145	936	962	969	981	970	848	874	861	843	845	580	564	576	594	593	228	229	226	212
										749	1202	1207	1216	1205	1169	1188	1240	1276	1201	1229	953	903	899	897	919	156	152	141	144	145	938	966	972	985	973	850	878	864	848	847	583	566	578	596	595	228	229	227	212
										750	1206	1210	1221	1210	1174	1192	1245	1280	1205	1234	955	906	903	900	922	156	153	141	145	145	940	968	976	988	977	853	881	866	850	849	584	567	580	597	597	230	230	227	212
										751	1211	1217	1226	1214	1178	1197	1249	1284	1208	1237	957	910	906	902	926	156	153	141	145	145	944	970	980	990	980	856	884	869	853	852	586	568	582	599	598	230	231	228	212
										752	1216	1222	1231	1219	1183	1203	1253	1287	1212	1241	961	914	909	905	930	156	153	141	146	145	948	975	984	995	984	859	887	871	856	854	588	570	584	600	600	230	231	228	213
										753	1222	1227	1235	1224	1187	1208	1256	1292	1216	1245	964	917	912	908	932	157	153	142	146	145	951	979	988	997	987	862	891	875	858	856	590	570	585	601	602	230	232	229	214
										754	1227	1231	1239	1227	1192	1212	1259	1296	1221	1249	968	920	915	910	935	157	153	142	146	146	953	981	993	1002	989	866	894	878	860	859	592	572	585	602	605	231	233	229	215
										755	1232	1234	1244	1232	1196	1215	1265	1301	1226	1252	971	922	918	913	938	157	153	142	146	146	956	984	997	1004	992	868	895	880	863	861	594	573	587	604	606	231	234	230	215
										756	1236	1237	1248	1238	1200	1219	1270	1306	1230	1256	974	925	921	917	943	157	153	142	146	146	958	987	1000	1008	996	870	897	884	866	864	596	575	589	606	608	232	234	231	215
										757	1240	1241	1253	1243	1204	1223	1274	1310	1235	1260	978	928	925	921	947	158	154	142	146	146	962	991	1002	1011	999	872	900	886	868	867	598	576	591	607	610	232	235	231	216
										758	1243	1247	1258	1248	1208	1229	1278	1314	1238	1266	982	932	927	924	950	158	154	142	146	147	966	993	1006	1013	1002	877	904	889	871	871	601	577	593	609	612	233	235	231	216
										759	1247	1252	1262	1253	1213	1233	1282	1319	1243	1271	986	934	930	928	953	158	154	143	147	147	969	997	1009	1016	1006	879	907	892	873	875	603	578	594	611	615	234	235	232	217
										760	1251	1257	1264	1255	1217	1238	1287	1324	1249	1275	990	937	934	930	957	158	154	143	147	147	971	999	1012	1019	1010	882	910	895	876	878	604	580	595	612	617	235	235	232	217
										761	1256	1262	1270	1260	1222	1241	1292	1330	1252	1278	994	941	937	933	960	159	154	143	147	147	974	1001	1014	1022	1012	885	914	897	879	880	607	581	598	614	619	236	236	233	217
										762	1260	1267	1274	1266	1228	1246	1297	1334	1258	1283	998	944	940	936	963	159	154	143	147	147	976	1005	1016	1025	1016	888	917	899	882	883	608	583	599	616	621	236	236	233	218
										763	1265	1271	1279	1269	1232	1251	1300	1339	1263	1287	1002	945	943	940	965	159	154	143	147	148	980	1009	1020	1028	1020	893	920	902	885	886	610	584	601	617	622	237	236	234	218
										764	1270	1276	1285	1273	1238	1254	1303	1344	1266	1291	1005	949	946	943	968	159	154	143	147	149	983	1012	1024	1031	1023	896	922	905	888	889	612	585	604	620	624	237	237	234	218
										765	1274	1281	1290	1278	1242	1258	1308	1349	1271	1296	1008	952	949	947	972	160	154	144	148	149	986	1015	1026	1036	1026	899	928	908	892	891	613	587	606	622	625	237	237	234	219
										766	1278	1285	1294	1282	1246	1262	1312	1354	1275	1301	1011	955	953	950	975	160	154	144	148	149	989	1018	1030	1039	1030	903	931	910	896	894	615	588	609	624	627	238	238	235	219
										767	1282	1289	1298	1286	1251	1265	1315	1357	1280	1304	1014	958	957	952	977	161	154	145	148	149	993	1021	1032	1044	1033	906	934	914	899	897	617	590	610	626	628	239	238	235	220
										768	1287	1294	1302	1291	1256	1269	1320	1362	1284	1307	1019	962	959	956	981	161	155	145	148	149	996	1024	1035	1048	1037	910	936	917	901	899	619	592	612	628	630	240	239	236	220
										769	1292	1298	1309	1295	1259	1274	1325	1367	1288	1313	1021	967	963	960	985	161	155	145	148	150	998	1027	1039	1052	1039	912	938	919	905	902	621	592	614	629	632	239	239	237	221
										770	1298	1303	1314	1300	1264	1277	1331	1373	1293	1318	1025	971	965	964	988	161	155	145	149	150	1001	1031	1042	1054	1042	915	942	923	908	904	623	595	615	631	634	240	239	237	221
										771	1305	1309	1318	1306	1268	1281	1334	1378	1297	1323	1028	973	968	967	992	161	155	145	149	150	1004	1035	1045	1057	1045	918	944	926	911	908	625	596	617	633	635	241	240	238	222
										772	1309	1314	1323	1310	1273	1286	1338	1382	1302	1327	1031	977	971	972	996	162	156	145	149	150	1008	1039	1048	1061	1048	919	948	929	914	911	627	596	619	635	636	241	240	238	222
										773	1314	1320	1328	1315	1277	1290	1344	1388	1307	1332	1034	979	974	976	999	162	156	145	150	150	1011	1043	1051	1064	1050	922	951	932	916	913	629	598	620	637	638	242	240	239	222
										774	1319	1325	1333	1321	1280	1295	1349	1392	1312	1338	1038	981	976	980	1002	162	156	146	150	151	1014	1047	1054	1068	1053	924	955	935	918	915	630	600	623	638	640	242	241	240	222
										775	1324	1331	1339	1326	1286	1299	1353	1397	1317	1341	1041	985	980	985	1006	162	156	146	150	151	1016	1052	1056	1071	1056	927	959	937	920	918	632	602	624	640	641	243	242	241	222
										776	1327	1336	1344	1331	1291	1303	1358	1403	1321	1344	1044	988	983	988	1009	162	156	146	150	151	1020	1055	1058	1074	1060	931	962	939	923	921	634	604	627	642	644	243	242	241	223
										777	1332	1341	1347	1335	1295	1307	1362	1407	1325	1348	1048	991	987	991	1012	162	156	146	150	151	1024	1058	1061	1077	1063	934	965	942	926	924	636	606	627	645	645	244	243	242	224
										778	1336	1347	1350	1342	1300	1313	1367	1411	1330	1351	1052	994	989	995	1015	163	157	147	150	151	1028	1061	1063	1080	1068	937	968	946	929	929	638	608	630	646	648	244	243	242	225
										779	1341	1351	1357	1348	1305	1318	1372	1415	1334	1356	1056	998	993	998	1018	163	157	147	150	151	1032	1066	1065	1084	1070	939	970	949	931	932	639	610	632	648	650	245	244	242	225
										780	1347	1356	1362	1353	1309	1322	1375	1419	1337	1360	1060	1001	997	1002	1022	163	157	147	150	151	1035	1069	1069	1087	1073	942	973	951	934	935	641	612	633	649	652	246	244	243	226
										781	1352	1360	1366	1359	1314	1327	1380	1424	1341	1365	1063	1004	1000	1004	1025	163	157	147	150	152	1038	1072	1071	1090	1076	945	977	954	937	938	643	614	635	651	654	246	245	243	226
										782	1357	1365	1371	1364	1317	1331	1385	1429	1345	1370	1066	1006	1004	1008	1028	163	157	147	151	152	1042	1076	1076	1093	1079	946	981	957	940	941	644	616	637	653	656	247	245	244	227
										783	1362	1369	1375	1368	1322	1337	1391	1434	1350	1375	1070	1010	1006	1012	1031	164	157	147	151	152	1045	1078	1079	1096	1084	949	985	960	943	944	645	618	638	654	659	247	246	244	228
										784	1367	1374	1379	1374	1326	1341	1395	1439	1355	1379	1074	1013	1010	1016	1035	164	158	147	151	152	1049	1082	1083	1099	1086	952	988	964	945	948	647	620	640	655	660	248	246	245	228
										785	1372	1378	1383	1381	1332	1345	1401	1444	1359	1383	1078	1015	1014	1018	1038	164	158	147	151	152	1052	1085	1086	1103	1090	954	992	967	949	950	648	621	642	657	663	249	246	246	229
										786	1375	1383	1388	1385	1338	1350	1406	1450	1364	1389	1082	1020	1018	1021	1040	164	158	148	151	152	1057	1089	1089	1106	1093	957	994	971	952	952	650	623	644	659	665	250	247	246	229
										787	1380	1387	1393	1390	1343	1355	1411	1455	1370	1392	1086	1022	1022	1024	1044	164	158	148	151	153	1061	1093	1092	1110	1097	960	997	974	955	956	652	625	646	661	667	251	247	247	230
										788	1386	1392	1398	1394	1348	1359	1416	1461	1374	1396	1090	1025	1027	1029	1048	164	158	148	151	153	1064	1096	1095	1115	1101	962	1001	978	958	959	653	626	648	662	669	251	247	247	230
										789	1390	1398	1403	1399	1353	1364	1422	1466	1379	1400	1096	1028	1029	1033	1052	165	158	148	151	153	1068	1101	1098	1117	1105	965	1003	980	961	962	655	628	650	664	670	251	248	248	230
										790	1396	1404	1408	1404	1358	1368	1428	1472	1385	1405	1099	1032	1032	1037	1055	165	158	148	151	153	1072	1104	1100	1121	1108	968	1005	985	964	964	656	629	651	666	672	252	248	248	230
										791	1401	1408	1413	1410	1365	1373	1433	1477	1389	1412	1102	1034	1036	1041	1058	165	158	148	151	153	1074	1108	1103	1125	1111	970	1010	989	966	966	659	631	653	666	674	253	249	249	231
										792	1407	1413	1419	1416	1370	1378	1438	1483	1395	1418	1106	1038	1040	1045	1062	166	159	148	151	154	1077	1112	1107	1128	1116	972	1014	993	969	970	661	632	655	667	676	253	249	249	231
										793	1412	1418	1426	1420	1375	1383	1442	1487	1401	1422	1109	1042	1042	1048	1065	166	159	149	152	154	1081	1116	1110	1130	1118	976	1017	996	973	973	663	635	657	669	679	254	250	249	231
										794	1417	1422	1431	1425	1380	1388	1447	1493	1407	1428	1112	1046	1046	1052	1068	166	160	149	152	154	1085	1119	1113	1134	1123	978	1020	999	975	977	664	637	659	671	680	254	251	250	232
										795	1423	1428	1439	1431	1384	1393	1452	1500	1411	1433	1117	1050	1048	1056	1072	166	160	149	152	154	1089	1122	1116	1139	1126	981	1024	1001	978	980	666	639	661	673	683	254	251	250	232
										796	1427	1434	1443	1436	1390	1397	1458	1506	1416	1438	1121	1053	1051	1060	1074	167	160	150	152	154	1094	1126	1121	1141	1129	983	1027	1005	981	983	667	642	663	675	684	255	252	250	232
										797	1433	1439	1448	1442	1394	1403	1462	1513	1423	1443	1125	1056	1055	1064	1078	167	160	150	152	154	1097	1130	1124	1145	1133	987	1031	1007	984	986	669	644	665	676	686	256	253	251	233
										798	1439	1444	1453	1446	1399	1408	1467	1520	1429	1448	1129	1061	1058	1067	1081	167	161	150	152	155	1101	1133	1127	1147	1136	990	1035	1011	987	990	671	646	666	679	688	256	253	251	233
										799	1446	1450	1460	1452	1405	1414	1472	1526	1433	1454	1132	1064	1062	1070	1083	167	161	150	153	155	1105	1136	1131	1151	1140	994	1039	1014	991	992	673	647	668	681	689	256	254	251	234
										800	1451	1456	1465	1458	1411	1419	1478	1533	1438	1459	1136	1068	1065	1074	1087	167	161	151	153	155	1108	1140	1134	1155	1144	997	1043	1019	996	995	675	648	670	682	691	257	255	252	235
										801	1456	1461	1471	1464	1418	1425	1483	1537	1444	1465	1139	1072	1069	1077	1091	168	161	151	153	156	1111	1143	1138	1158	1149	999	1047	1023	999	998	676	649	672	685	692	258	255	252	235
										802	1460	1467	1476	1470	1422	1431	1489	1543	1450	1471	1144	1075	1072	1081	1094	168	162	151	153	156	1114	1147	1142	1162	1152	1002	1050	1026	1001	1002	678	650	674	686	694	258	256	253	235
										803	1465	1473	1482	1475	1426	1436	1495	1548	1456	1475	1148	1080	1075	1084	1098	168	162	151	153	156	1117	1152	1146	1167	1157	1005	1053	1029	1004	1006	680	652	675	688	696	259	256	254	236
										804	1471	1478	1486	1481	1430	1442	1500	1553	1461	1481	1151	1084	1079	1087	1101	169	162	152	153	156	1122	1155	1150	1171	1161	1008	1058	1031	1007	1009	681	653	676	689	698	259	256	254	236
										805	1475	1483	1494	1486	1436	1447	1504	1559	1467	1486	1155	1087	1082	1090	1105	169	162	152	153	156	1125	1157	1153	1174	1165	1012	1062	1034	1011	1012	683	655	678	691	700	260	257	255	237
										806	1481	1489	1500	1491	1441	1451	1510	1564	1473	1492	1159	1091	1086	1095	1110	169	163	152	154	156	1129	1161	1157	1178	1168	1015	1066	1038	1015	1016	685	657	679	692	701	260	258	255	237
										807	1487	1494	1505	1497	1447	1458	1516	1570	1478	1497	1162	1094	1090	1098	1113	169	163	153	154	157	1132	1164	1162	1182	1170	1018	1069	1041	1018	1019	687	658	681	695	704	261	258	256	238
										808	1493	1501	1512	1501	1451	1463	1522	1576	1484	1503	1167	1097	1094	1102	1117	169	163	153	154	157	1135	1168	1166	1186	1174	1020	1073	1044	1020	1022	690	660	682	696	705	261	259	256	238
										809	1497	1507	1517	1507	1456	1468	1526	1581	1490	1508	1170	1101	1098	1107	1120	169	163	153	154	157	1140	1173	1172	1189	1178	1023	1076	1047	1024	1024	692	661	684	698	707	262	259	257	238
										810	1502	1513	1522	1512	1462	1474	1533	1588	1496	1514	1174	1105	1102	1111	1124	169	164	153	154	157	1144	1177	1175	1193	1183	1026	1080	1051	1027	1027	693	662	687	700	709	262	259	257	239
										811	1508	1518	1528	1517	1468	1479	1538	1592	1501	1521	1178	1108	1107	1115	1128	170	164	153	154	157	1147	1181	1179	1195	1188	1029	1084	1053	1031	1031	695	664	688	701	711	263	260	257	240
										812	1514	1524	1534	1524	1474	1484	1544	1599	1507	1528	1182	1111	1110	1119	1131	170	164	153	155	158	1150	1185	1184	1201	1192	1033	1087	1056	1035	1035	697	667	690	702	713	263	260	257	240
										813	1519	1529	1540	1528	1478	1489	1550	1605	1513	1533	1186	1114	1113	1122	1134	170	164	154	155	158	1155	1188	1187	1203	1196	1038	1090	1059	1038	1037	699	669	692	703	715	264	261	257	240
										814	1524	1534	1546	1534	1484	1495	1554	1612	1519	1538	1190	1119	1117	1125	1137	170	164	154	155	158	1158	1192	1190	1207	1198	1042	1092	1062	1042	1039	701	671	695	705	717	264	261	258	241
										815	1531	1540	1552	1541	1488	1500	1559	1618	1524	1544	1193	1122	1119	1130	1140	170	164	154	155	158	1161	1196	1193	1211	1202	1045	1095	1065	1046	1042	703	673	696	707	719	265	261	258	241
										816	1537	1546	1557	1546	1493	1506	1565	1623	1530	1548	1197	1125	1123	1134	1144	170	164	154	155	158	1165	1201	1199	1215	1207	1048	1099	1067	1050	1046	704	674	698	709	720	266	261	259	242
										817	1543	1550	1562	1551	1499	1513	1571	1628	1536	1553	1201	1130	1127	1139	1147	171	164	154	156	158	1170	1204	1203	1220	1212	1053	1103	1071	1054	1048	707	677	700	711	722	266	262	260	243
										818	1548	1556	1570	1557	1505	1517	1576	1635	1542	1560	1205	1134	1131	1143	1151	171	165	154	156	158	1173	1207	1206	1224	1217	1056	1107	1075	1058	1051	707	678	701	713	724	267	263	260	243
										819	1555	1561	1575	1562	1510	1524	1580	1640	1547	1564	1209	1137	1135	1147	1155	171	166	155	156	158	1176	1210	1210	1228	1221	1061	1110	1079	1062	1054	708	680	703	715	726	268	263	261	243
										820	1560	1566	1580	1567	1515	1529	1586	1646	1554	1572	1213	1141	1139	1150	1159	171	166	155	156	158	1181	1214	1215	1232	1226	1063	1112	1082	1064	1057	710	682	705	717	728	268	263	261	244
										821	1566	1572	1586	1573	1520	1535	1592	1652	1561	1578	1218	1145	1143	1153	1165	171	166	155	156	158	1184	1219	1221	1236	1229	1067	1115	1084	1067	1061	712	684	707	720	730	268	264	262	244
										822	1572	1578	1593	1578	1524	1541	1598	1658	1568	1584	1223	1148	1148	1157	1168	172	166	155	156	158	1186	1223	1224	1242	1233	1070	1119	1087	1069	1064	714	686	709	721	732	268	265	263	245
										823	1577	1585	1599	1584	1531	1546	1604	1664	1574	1590	1229	1153	1152	1161	1173	172	166	156	157	158	1190	1226	1228	1246	1237	1073	1121	1089	1072	1068	715	687	711	723	734	269	266	263	245
										824	1583	1590	1605	1591	1536	1552	1610	1670	1580	1597	1233	1155	1156	1165	1177	173	167	156	157	158	1193	1230	1232	1250	1240	1077	1125	1092	1075	1071	716	689	713	726	737	269	266	263	246
										825	1589	1597	1611	1597	1542	1559	1614	1675	1586	1603	1237	1159	1159	1170	1182	173	167	156	157	159	1196	1234	1236	1254	1244	1080	1131	1095	1078	1075	718	691	714	727	739	269	267	263	246
										826	1594	1603	1617	1604	1548	1564	1620	1681	1592	1609	1242	1164	1164	1174	1185	173	167	156	157	159	1199	1238	1240	1259	1250	1083	1135	1098	1082	1078	720	693	716	729	741	270	267	264	247
										827	1599	1609	1623	1610	1555	1569	1627	1687	1598	1614	1248	1167	1168	1177	1189	173	168	156	158	159	1203	1242	1245	1263	1254	1087	1139	1102	1085	1083	723	694	719	731	742	271	268	264	247
										828	1605	1614	1630	1615	1561	1575	1633	1694	1605	1619	1252	1171	1172	1181	1192	173	168	157	158	159	1208	1246	1249	1267	1258	1091	1142	1106	1089	1086	725	696	720	733	744	270	269	265	248
										829	1612	1620	1637	1622	1568	1583	1640	1700	1612	1626	1255	1174	1176	1186	1197	174	168	157	158	160	1211	1249	1252	1271	1261	1094	1146	1109	1092	1089	727	697	722	734	747	271	269	265	248
										830	1619	1626	1642	1627	1573	1589	1648	1706	1616	1632	1259	1178	1181	1190	1201	174	168	157	158	160	1215	1254	1255	1275	1265	1098	1148	1112	1095	1092	730	700	724	735	749	271	270	265	249
										831	1624	1631	1647	1635	1579	1595	1655	1711	1621	1638	1264	1182	1184	1195	1205	174	168	157	158	160	1220	1258	1259	1278	1271	1102	1150	1116	1099	1095	733	702	726	737	751	272	270	266	249
										832	1631	1638	1654	1641	1586	1602	1659	1718	1626	1645	1269	1186	1187	1199	1209	174	169	158	159	160	1223	1264	1263	1282	1275	1105	1153	1119	1102	1100	736	704	729	739	752	272	270	267	249
										833	1639	1643	1660	1646	1593	1608	1664	1724	1634	1652	1273	1190	1191	1203	1215	174	169	158	159	160	1228	1268	1266	1285	1278	1108	1157	1123	1107	1104	737	705	731	740	754	273	271	268	250
										834	1645	1649	1666	1653	1599	1615	1670	1730	1639	1658	1277	1195	1194	1207	1219	174	169	158	159	160	1232	1272	1271	1288	1282	1113	1160	1126	1110	1107	739	707	732	743	757	274	271	268	251
										835	1652	1655	1672	1659	1605	1620	1676	1737	1645	1666	1281	1199	1199	1212	1224	175	169	158	160	161	1237	1277	1274	1292	1286	1117	1163	1131	1113	1110	741	708	734	745	758	274	272	269	251
										836	1659	1659	1677	1665	1610	1626	1681	1743	1650	1672	1286	1204	1202	1215	1227	175	169	159	160	161	1242	1282	1277	1297	1290	1120	1167	1135	1116	1114	744	710	737	747	760	275	272	270	252
										837	1664	1666	1684	1671	1616	1632	1687	1750	1657	1677	1291	1207	1207	1218	1232	175	169	159	160	161	1246	1286	1283	1302	1296	1123	1170	1139	1119	1117	745	712	739	750	763	275	272	270	252
										838	1670	1671	1689	1677	1621	1638	1694	1757	1662	1684	1296	1211	1211	1223	1236	175	170	159	160	161	1249	1290	1287	1305	1300	1126	1173	1142	1122	1120	747	713	741	752	766	275	273	271	253
										839	1677	1677	1695	1684	1629	1645	1700	1764	1669	1689	1300	1215	1216	1226	1241	176	170	159	160	162	1252	1293	1291	1310	1304	1129	1176	1146	1125	1124	749	715	743	754	769	276	274	272	253
										840	1682	1684	1701	1689	1634	1650	1705	1769	1673	1695	1303	1219	1220	1232	1244	176	170	159	160	162	1254	1297	1295	1313	1308	1132	1180	1150	1129	1127	750	718	745	756	771	276	275	273	254
										841	1687	1688	1707	1696	1640	1655	1710	1776	1680	1702	1308	1223	1223	1235	1247	176	170	159	160	162	1261	1303	1299	1317	1310	1135	1183	1152	1132	1131	751	719	747	759	774	277	275	273	255
										842	1693	1696	1713	1702	1647	1661	1717	1783	1686	1709	1313	1228	1227	1239	1253	177	171	159	160	162	1263	1308	1303	1323	1313	1138	1187	1156	1135	1135	754	721	748	760	776	278	276	274	255
										843	1699	1702	1719	1710	1653	1666	1723	1789	1692	1716	1319	1233	1231	1242	1255	177	171	159	161	163	1268	1313	1307	1326	1316	1142	1191	1159	1138	1139	756	724	750	763	777	278	276	274	256
										844	1707	1708	1726	1717	1658	1671	1729	1794	1697	1724	1323	1238	1235	1247	1260	177	171	160	161	163	1272	1317	1312	1330	1320	1146	1194	1163	1141	1143	759	725	752	765	780	279	277	275	256
										845	1712	1713	1734	1722	1663	1678	1735	1801	1704	1732	1327	1242	1239	1251	1265	177	172	160	161	163	1275	1320	1318	1335	1324	1149	1197	1167	1144	1147	761	727	755	766	782	280	278	276	257
										846	1717	1719	1740	1730	1669	1684	1743	1809	1711	1739	1332	1247	1243	1255	1269	178	172	160	161	163	1280	1324	1321	1340	1329	1152	1200	1169	1147	1151	763	730	758	768	784	280	278	276	257
										847	1723	1725	1748	1736	1674	1689	1750	1814	1717	1745	1337	1251	1248	1260	1275	178	172	160	162	164	1284	1327	1326	1345	1333	1155	1204	1173	1151	1155	764	732	759	770	786	281	279	277	258
										848	1728	1733	1756	1742	1680	1695	1758	1821	1722	1751	1342	1255	1252	1264	1280	178	172	160	162	164	1289	1331	1330	1350	1337	1159	1209	1177	1154	1159	766	734	760	772	788	282	280	277	258
										849	1735	1739	1761	1748	1687	1700	1765	1826	1728	1758	1345	1260	1256	1268	1287	179	173	160	162	164	1293	1337	1335	1355	1342	1163	1212	1181	1159	1163	768	736	762	775	791	283	280	278	259
										850	1740	1744	1768	1755	1692	1707	1770	1832	1735	1766	1349	1264	1260	1272	1291	179	172	161	162	165	1298	1341	1338	1359	1347	1167	1217	1184	1162	1166	770	740	765	777	792	283	281	279	259
										851	1747	1751	1773	1762	1699	1714	1776	1840	1741	1772	1353	1269	1264	1276	1295	179	173	161	162	165	1303	1344	1342	1363	1351	1170	1219	1187	1166	1170	772	741	767	780	793	284	281	279	260
										852	1754	1759	1779	1768	1705	1720	1782	1846	1747	1777	1356	1272	1268	1281	1300	180	173	161	163	165	1307	1348	1346	1367	1357	1174	1223	1190	1169	1173	773	743	768	783	795	284	282	280	260
										853	1759	1765	1786	1776	1712	1726	1789	1854	1754	1783	1360	1276	1271	1285	1304	180	174	162	163	165	1310	1353	1352	1372	1362	1178	1225	1194	1173	1176	775	746	770	785	798	285	282	281	261
										854	1768	1771	1792	1782	1719	1733	1796	1862	1762	1789	1365	1282	1275	1289	1307	181	174	162	164	166	1315	1357	1357	1376	1367	1181	1230	1197	1177	1180	777	747	773	787	800	285	283	281	261
										855	1774	1778	1799	1788	1725	1739	1802	1868	1768	1795	1370	1287	1278	1293	1313	181	174	162	164	166	1318	1362	1360	1381	1373	1184	1234	1200	1181	1184	778	749	774	789	802	285	283	282	261
										856	1781	1783	1806	1794	1731	1745	1810	1875	1775	1803	1373	1292	1282	1297	1319	181	175	162	164	166	1321	1365	1366	1386	1378	1188	1238	1204	1184	1187	780	750	776	793	804	286	283	282	262
										857	1787	1790	1813	1800	1737	1751	1815	1882	1781	1810	1377	1294	1284	1302	1323	181	175	162	164	166	1325	1370	1370	1392	1382	1193	1241	1207	1188	1192	782	752	778	795	807	287	284	283	263
										858	1795	1796	1819	1806	1744	1757	1821	1889	1788	1817	1382	1300	1289	1306	1328	182	175	162	164	167	1328	1374	1376	1395	1386	1196	1245	1210	1191	1195	785	753	782	797	809	288	284	284	263
										859	1802	1801	1825	1813	1749	1765	1828	1896	1794	1825	1386	1304	1294	1310	1332	182	176	163	164	167	1332	1378	1380	1399	1391	1199	1250	1214	1196	1198	787	755	784	800	810	288	284	285	264
										860	1808	1808	1833	1820	1755	1770	1834	1902	1800	1831	1390	1308	1297	1315	1338	182	177	163	164	167	1338	1382	1385	1404	1395	1202	1255	1219	1199	1202	790	758	785	801	811	289	285	285	265
										861	1816	1816	1839	1828	1763	1778	1840	1909	1805	1839	1395	1312	1302	1320	1343	183	177	163	165	167	1343	1388	1391	1406	1398	1207	1259	1222	1203	1206	792	761	788	803	813	290	286	286	265
										862	1824	1824	1847	1834	1770	1783	1846	1915	1811	1846	1401	1316	1307	1323	1348	183	177	163	165	168	1347	1393	1394	1411	1402	1210	1264	1226	1207	1209	794	762	790	805	815	290	287	286	266
										863	1829	1831	1854	1839	1775	1790	1854	1921	1817	1854	1405	1321	1312	1327	1351	183	178	163	165	168	1351	1398	1400	1416	1406	1215	1268	1229	1210	1213	796	765	793	808	818	290	287	286	266
										864	1835	1838	1861	1847	1783	1796	1862	1929	1824	1862	1410	1326	1317	1331	1357	184	178	163	165	168	1357	1403	1403	1421	1411	1218	1271	1234	1214	1216	798	767	795	810	819	290	288	287	267
										865	1842	1845	1866	1855	1789	1801	1869	1938	1829	1868	1415	1329	1321	1335	1362	184	178	164	165	169	1361	1407	1408	1426	1415	1220	1275	1237	1217	1220	800	770	797	812	822	290	289	287	267
										866	1850	1853	1873	1861	1796	1808	1875	1944	1836	1875	1420	1334	1326	1340	1367	184	178	164	165	169	1367	1410	1415	1431	1419	1224	1280	1240	1221	1225	804	773	800	814	824	291	289	288	268
										867	1856	1860	1881	1867	1802	1815	1883	1950	1843	1884	1426	1338	1329	1344	1371	185	178	164	165	169	1371	1413	1418	1435	1423	1227	1283	1242	1225	1229	807	775	803	816	826	291	289	289	268
										868	1862	1867	1888	1873	1808	1822	1890	1957	1848	1890	1432	1342	1335	1347	1376	185	178	164	166	169	1375	1418	1423	1441	1428	1230	1287	1248	1230	1233	809	776	805	820	829	292	289	289	269
										869	1871	1875	1895	1878	1813	1828	1899	1962	1855	1897	1436	1346	1339	1351	1380	186	179	165	166	170	1380	1420	1428	1446	1432	1235	1290	1252	1235	1237	812	780	807	823	832	292	289	290	270
										870	1879	1882	1902	1887	1819	1833	1906	1970	1862	1903	1441	1350	1343	1355	1385	186	179	165	166	170	1383	1424	1434	1452	1436	1238	1294	1256	1240	1241	815	783	809	826	834	293	289	292	271
										871	1885	1889	1909	1892	1825	1841	1912	1978	1869	1910	1446	1355	1347	1360	1390	186	179	165	166	170	1389	1429	1437	1456	1441	1241	1299	1260	1242	1244	817	784	811	828	836	294	290	292	271
										872	1893	1895	1916	1900	1834	1848	1920	1986	1877	1918	1451	1360	1351	1365	1395	186	180	165	167	170	1393	1432	1443	1463	1447	1245	1303	1264	1245	1247	819	787	813	831	838	294	291	292	272
										873	1900	1902	1922	1908	1841	1854	1927	1993	1881	1924	1456	1364	1356	1368	1402	187	180	166	167	170	1397	1436	1446	1469	1451	1250	1308	1268	1250	1250	822	789	815	833	840	295	291	293	273
										874	1906	1908	1927	1916	1849	1862	1932	1999	1887	1932	1462	1367	1359	1373	1407	187	180	166	167	170	1400	1442	1451	1474	1457	1253	1313	1272	1254	1255	824	793	817	835	841	296	293	294	273
										875	1911	1916	1933	1922	1855	1868	1940	2006	1893	1938	1466	1371	1364	1378	1410	187	180	166	167	170	1403	1448	1456	1478	1461	1258	1318	1275	1258	1260	827	796	819	838	844	297	293	295	273
										876	1916	1922	1940	1929	1861	1874	1948	2013	1900	1947	1471	1375	1369	1382	1415	188	181	166	167	170	1408	1452	1462	1483	1465	1262	1321	1280	1262	1264	829	799	822	841	846	297	294	296	274
										877	1924	1930	1947	1936	1868	1880	1955	2019	1906	1955	1477	1379	1375	1388	1419	189	181	166	168	171	1413	1457	1466	1487	1471	1265	1325	1284	1265	1269	831	801	824	842	848	298	294	296	274
										878	1932	1936	1954	1944	1875	1887	1961	2026	1912	1962	1482	1385	1380	1392	1423	189	181	167	168	171	1419	1460	1470	1493	1474	1269	1329	1290	1269	1274	833	803	826	845	850	299	295	296	275
										879	1939	1943	1960	1950	1882	1894	1969	2034	1919	1969	1488	1389	1384	1397	1428	189	181	167	168	171	1425	1464	1476	1499	1478	1272	1333	1294	1273	1277	834	806	829	848	853	300	295	297	276
										880	1946	1950	1967	1958	1890	1901	1975	2041	1927	1977	1492	1394	1389	1401	1432	189	182	167	169	171	1430	1470	1480	1505	1484	1275	1339	1298	1278	1282	837	808	831	850	855	300	295	297	276
										881	1952	1957	1975	1965	1898	1907	1983	2049	1935	1984	1497	1397	1393	1404	1437	190	182	167	169	171	1435	1475	1485	1511	1488	1280	1344	1303	1281	1287	839	811	833	853	858	301	296	297	276
										882	1960	1965	1982	1971	1905	1914	1990	2056	1941	1991	1502	1402	1398	1409	1442	190	182	167	169	172	1441	1481	1490	1517	1494	1284	1349	1308	1285	1292	843	813	835	855	860	302	296	298	277
										883	1967	1971	1989	1979	1912	1920	1997	2063	1948	1998	1506	1406	1402	1414	1447	190	182	167	169	172	1446	1485	1494	1523	1499	1288	1353	1312	1290	1298	846	814	837	858	862	303	296	298	277
										884	1973	1979	1998	1986	1919	1927	2003	2072	1955	2006	1513	1412	1408	1419	1453	190	182	167	170	172	1451	1489	1500	1528	1503	1292	1356	1315	1293	1303	849	816	840	861	865	303	296	299	278
										885	1982	1987	2007	1994	1927	1933	2010	2079	1961	2012	1517	1416	1414	1424	1457	190	182	168	170	172	1454	1493	1504	1534	1509	1296	1362	1319	1296	1308	851	819	841	863	867	304	297	299	279
										886	1988	1993	2014	2001	1935	1940	2017	2087	1968	2021	1521	1420	1418	1428	1462	191	182	168	170	173	1460	1498	1509	1539	1514	1301	1368	1323	1301	1312	853	821	843	865	869	305	298	299	279
										887	1994	2001	2024	2006	1942	1946	2023	2094	1974	2028	1527	1425	1423	1432	1467	191	183	168	170	173	1465	1505	1514	1543	1518	1305	1373	1328	1304	1317	855	824	847	867	872	305	299	300	280
										888	2002	2010	2030	2015	1949	1954	2030	2100	1981	2035	1532	1432	1429	1436	1473	192	183	168	171	173	1469	1509	1519	1549	1524	1308	1377	1333	1309	1320	858	826	849	870	874	306	299	300	280
										889	2009	2017	2036	2022	1957	1960	2038	2108	1987	2041	1537	1435	1435	1440	1478	193	184	168	171	174	1475	1514	1524	1554	1529	1311	1382	1338	1313	1324	861	828	850	872	876	307	299	301	281
										890	2018	2024	2043	2029	1964	1967	2045	2115	1996	2046	1543	1439	1439	1446	1482	193	184	169	171	174	1479	1519	1530	1559	1535	1314	1388	1341	1318	1328	863	829	851	874	879	307	299	301	281
										891	2025	2031	2049	2036	1972	1974	2053	2124	2003	2053	1548	1444	1443	1451	1488	193	184	169	172	174	1483	1524	1536	1563	1540	1318	1393	1346	1322	1331	865	831	853	877	882	307	300	302	282
										892	2031	2039	2058	2045	1980	1983	2060	2131	2009	2060	1552	1449	1448	1456	1493	194	185	169	172	175	1488	1530	1543	1566	1546	1323	1396	1351	1327	1337	867	833	855	881	883	308	301	302	282
										893	2039	2047	2065	2052	1988	1989	2067	2138	2015	2066	1557	1453	1453	1461	1499	194	185	169	172	176	1493	1535	1548	1572	1551	1327	1400	1354	1330	1341	869	836	858	883	885	308	302	303	283
										894	2047	2052	2072	2060	1996	1996	2075	2147	2023	2073	1563	1458	1457	1467	1504	195	186	170	172	176	1498	1538	1553	1576	1555	1331	1404	1357	1333	1345	873	838	860	885	888	309	302	304	283
										895	2055	2059	2080	2067	2003	2003	2082	2153	2028	2078	1569	1463	1463	1473	1510	195	186	170	173	176	1504	1542	1558	1582	1560	1336	1409	1363	1337	1351	874	840	861	887	890	309	303	305	284
										896	2062	2068	2087	2076	2010	2009	2089	2160	2034	2086	1574	1469	1469	1478	1514	196	186	170	173	176	1509	1548	1563	1586	1566	1340	1412	1368	1341	1355	876	844	864	889	892	309	303	305	284
										897	2070	2075	2093	2084	2015	2015	2098	2167	2039	2092	1579	1474	1475	1482	1518	196	186	170	173	177	1514	1553	1569	1591	1572	1343	1418	1372	1345	1358	878	846	866	891	894	310	304	306	284
										898	2078	2082	2100	2091	2022	2022	2105	2175	2047	2100	1586	1481	1481	1486	1523	196	187	171	173	177	1518	1559	1574	1597	1578	1347	1424	1376	1350	1363	881	849	867	895	896	310	304	306	285
										899	2086	2091	2108	2100	2031	2028	2113	2184	2054	2108	1592	1487	1486	1490	1526	196	187	171	173	177	1523	1564	1580	1602	1584	1351	1427	1379	1354	1366	884	850	869	898	899	310	304	306	286
										900	2094	2098	2115	2109	2039	2035	2119	2193	2060	2114	1596	1491	1492	1493	1532	197	187	171	173	178	1528	1570	1583	1606	1589	1357	1433	1384	1357	1372	886	853	872	900	902	311	305	306	286
										901	2102	2106	2123	2119	2046	2042	2127	2200	2068	2120	1602	1496	1497	1497	1537	197	187	171	173	178	1532	1574	1590	1612	1593	1361	1437	1388	1360	1375	888	856	874	902	905	312	306	307	287
										902	2110	2114	2131	2126	2053	2049	2134	2206	2076	2129	1607	1500	1501	1502	1541	197	187	172	174	178	1536	1579	1594	1619	1598	1366	1441	1392	1364	1379	890	859	876	905	907	312	306	308	287
										903	2118	2122	2139	2135	2061	2056	2140	2213	2081	2137	1611	1506	1506	1506	1547	198	188	172	174	178	1541	1583	1599	1624	1606	1371	1445	1397	1370	1383	892	862	878	907	909	313	307	309	288
										904	2127	2128	2147	2143	2068	2063	2148	2223	2089	2144	1617	1509	1511	1512	1551	198	188	172	174	178	1548	1588	1603	1627	1611	1375	1450	1403	1374	1388	895	864	880	909	911	313	308	310	287
										905	2134	2136	2155	2151	2076	2070	2156	2231	2096	2151	1621	1514	1516	1517	1556	198	189	173	175	179	1551	1594	1609	1634	1616	1379	1454	1408	1378	1391	898	868	882	911	914	313	309	311	288
										906	2141	2144	2162	2159	2084	2076	2162	2240	2104	2156	1627	1519	1521	1522	1562	198	189	173	175	179	1556	1600	1614	1638	1621	1384	1459	1413	1382	1396	901	870	885	914	916	314	309	311	288
										907	2150	2153	2170	2166	2094	2083	2170	2247	2112	2163	1633	1524	1526	1527	1570	199	190	174	175	179	1559	1606	1619	1643	1627	1388	1463	1418	1387	1399	904	872	887	916	917	316	310	311	289
										908	2157	2162	2178	2174	2101	2091	2177	2255	2120	2170	1638	1529	1531	1533	1574	199	190	174	175	179	1564	1613	1624	1647	1632	1392	1466	1422	1390	1404	906	874	889	919	921	316	311	312	289
										909	2164	2169	2188	2181	2110	2097	2185	2264	2127	2178	1644	1533	1537	1538	1579	199	190	174	175	180	1569	1618	1629	1654	1637	1398	1471	1426	1395	1409	909	877	891	920	923	317	312	312	289
										910	2173	2176	2197	2188	2117	2106	2193	2271	2135	2187	1649	1538	1542	1544	1584	199	190	175	175	180	1573	1625	1633	1660	1644	1402	1476	1430	1400	1413	911	880	893	921	927	317	312	312	290
										911	2181	2185	2205	2196	2126	2113	2202	2281	2141	2195	1654	1543	1548	1551	1587	199	191	175	176	180	1578	1631	1637	1664	1650	1407	1481	1434	1404	1418	913	885	896	923	930	318	312	313	290
										912	2190	2193	2214	2206	2134	2119	2210	2288	2149	2203	1659	1548	1553	1557	1593	200	191	175	176	180	1583	1635	1643	1670	1655	1413	1485	1439	1409	1422	916	887	898	925	932	319	313	314	291
										913	2199	2200	2224	2214	2141	2127	2217	2295	2156	2211	1664	1554	1558	1563	1598	200	192	175	177	180	1588	1641	1649	1676	1660	1419	1490	1445	1412	1426	918	890	901	928	935	320	314	314	292
										914	2207	2208	2232	2224	2151	2135	2225	2303	2164	2220	1669	1558	1564	1567	1604	201	192	175	177	181	1592	1646	1655	1682	1664	1423	1495	1451	1418	1429	920	893	903	931	938	321	314	315	292
										915	2214	2216	2240	2231	2160	2143	2234	2310	2172	2228	1674	1563	1569	1573	1609	202	193	175	177	181	1598	1651	1661	1687	1671	1428	1499	1455	1423	1432	922	895	905	935	940	322	315	315	293
										916	2222	2225	2247	2238	2169	2153	2242	2319	2179	2235	1680	1568	1575	1579	1615	202	193	175	177	181	1605	1656	1665	1692	1678	1433	1503	1460	1428	1437	925	898	908	937	943	322	315	316	294
										917	2232	2234	2257	2245	2176	2160	2250	2329	2186	2243	1685	1573	1581	1584	1622	202	193	176	177	181	1610	1662	1670	1698	1684	1437	1508	1465	1432	1442	927	901	910	940	945	323	316	317	294
										918	2240	2244	2266	2254	2182	2170	2258	2338	2193	2251	1691	1579	1587	1590	1627	202	193	176	178	182	1614	1666	1675	1703	1690	1441	1513	1469	1438	1447	929	904	913	943	948	324	316	318	295
										919	2246	2252	2273	2261	2191	2178	2266	2347	2201	2259	1696	1585	1592	1597	1630	203	193	176	178	182	1621	1671	1682	1709	1695	1446	1517	1473	1444	1454	931	907	915	946	953	325	317	319	295
										920	2253	2259	2282	2269	2199	2187	2273	2356	2208	2266	1702	1590	1598	1603	1635	203	193	176	179	182	1626	1676	1687	1716	1702	1453	1523	1478	1448	1458	933	909	916	947	955	325	318	320	296
										921	2261	2268	2290	2278	2207	2195	2282	2364	2215	2274	1707	1595	1602	1608	1641	203	194	176	179	182	1632	1680	1693	1721	1709	1459	1527	1483	1454	1461	935	910	919	950	958	326	319	321	297
										922	2269	2276	2299	2285	2214	2204	2291	2374	2223	2283	1713	1600	1607	1613	1645	204	194	177	180	182	1638	1687	1699	1727	1713	1464	1532	1489	1458	1467	937	914	922	953	959	327	320	321	298
										923	2279	2284	2308	2296	2222	2212	2299	2383	2232	2293	1718	1607	1614	1619	1651	205	194	177	181	182	1643	1693	1704	1732	1718	1469	1536	1494	1463	1472	940	916	925	956	962	328	321	322	300
										924	2287	2293	2317	2303	2228	2219	2308	2392	2240	2301	1722	1612	1620	1623	1655	205	195	177	181	183	1648	1698	1710	1736	1721	1474	1540	1498	1469	1478	942	919	928	958	964	329	321	323	300
										925	2298	2303	2325	2310	2239	2227	2316	2402	2250	2309	1728	1618	1626	1628	1660	205	195	177	181	183	1653	1704	1716	1744	1729	1479	1545	1503	1475	1484	944	922	931	959	967	329	322	324	301
										926	2308	2312	2333	2319	2249	2236	2325	2408	2257	2318	1735	1624	1629	1634	1665	205	195	178	182	183	1659	1710	1723	1749	1735	1484	1552	1509	1480	1490	948	925	933	963	970	330	323	325	302
										927	2316	2321	2341	2330	2257	2246	2332	2416	2264	2326	1741	1629	1635	1642	1670	205	196	178	182	184	1664	1716	1729	1754	1742	1487	1556	1515	1484	1494	951	926	935	964	972	331	323	325	302
										928	2324	2329	2349	2339	2265	2255	2341	2423	2272	2336	1746	1633	1639	1647	1676	206	196	178	182	184	1668	1722	1735	1760	1747	1492	1561	1520	1490	1499	953	928	938	968	975	332	324	326	302
										929	2332	2338	2357	2347	2273	2260	2349	2432	2279	2344	1751	1638	1644	1652	1682	206	197	178	183	184	1675	1727	1741	1766	1752	1498	1565	1526	1494	1505	956	929	941	970	976	333	325	327	303
										930	2342	2347	2366	2355	2282	2268	2356	2441	2288	2352	1758	1644	1650	1659	1689	206	197	178	184	184	1681	1733	1747	1773	1758	1504	1569	1531	1500	1510	959	932	943	973	978	333	326	327	304
										931	2351	2355	2375	2362	2291	2276	2364	2450	2296	2360	1765	1650	1656	1665	1694	207	197	179	184	184	1686	1738	1752	1777	1766	1509	1574	1536	1507	1514	960	935	945	979	981	334	327	328	304
										932	2360	2362	2383	2372	2298	2284	2373	2457	2303	2368	1771	1656	1662	1670	1700	207	197	179	184	185	1692	1746	1758	1784	1772	1514	1578	1541	1514	1519	962	937	947	981	984	335	327	329	305
										933	2369	2370	2392	2379	2307	2291	2383	2467	2311	2375	1778	1661	1667	1676	1706	208	197	179	185	185	1699	1751	1763	1790	1778	1519	1584	1546	1519	1524	964	939	949	984	987	336	328	329	305
										934	2379	2377	2401	2388	2315	2299	2392	2475	2321	2383	1783	1666	1673	1681	1712	208	198	179	185	185	1705	1755	1768	1796	1784	1523	1589	1550	1523	1529	967	942	953	986	991	337	328	330	306
										935	2388	2386	2411	2397	2324	2308	2402	2484	2330	2390	1789	1672	1678	1685	1718	209	198	179	185	185	1710	1761	1774	1803	1791	1529	1593	1556	1529	1534	970	946	955	988	994	337	329	330	307
										936	2395	2397	2421	2405	2333	2316	2411	2494	2338	2397	1796	1677	1683	1691	1725	209	198	179	185	185	1715	1766	1779	1808	1797	1534	1598	1560	1533	1541	973	948	958	992	996	338	329	332	307
										937	2405	2407	2429	2414	2341	2323	2420	2502	2346	2406	1801	1684	1689	1696	1732	210	198	179	185	185	1719	1772	1786	1814	1803	1538	1604	1564	1539	1545	976	950	961	995	999	338	330	333	308
										938	2413	2415	2440	2422	2350	2332	2427	2510	2354	2414	1806	1689	1694	1702	1737	210	199	180	185	186	1724	1777	1793	1821	1809	1543	1610	1570	1543	1551	979	953	964	998	1002	339	330	333	309
										939	2422	2424	2449	2430	2360	2341	2436	2519	2363	2423	1813	1695	1700	1709	1743	211	199	180	186	186	1729	1784	1798	1827	1817	1547	1614	1575	1547	1557	982	955	967	1000	1006	339	331	334	309
										940	2431	2434	2458	2439	2370	2348	2446	2528	2372	2432	1819	1701	1707	1715	1748	211	199	180	185	186	1736	1790	1805	1836	1823	1553	1619	1579	1552	1561	984	956	970	1003	1008	341	332	335	310
										941	2440	2443	2465	2449	2378	2355	2454	2537	2381	2440	1825	1706	1712	1720	1754	211	199	180	186	187	1742	1798	1810	1841	1828	1558	1625	1584	1557	1567	987	958	973	1006	1011	341	333	335	310
										942	2448	2452	2475	2459	2388	2364	2462	2545	2391	2448	1832	1712	1717	1725	1758	211	199	181	186	187	1746	1802	1815	1849	1835	1561	1631	1588	1562	1573	990	962	976	1009	1013	342	333	336	311
										943	2458	2462	2484	2468	2397	2371	2472	2554	2400	2456	1838	1717	1723	1730	1763	212	200	181	187	188	1752	1809	1822	1855	1840	1567	1637	1595	1566	1578	992	964	978	1011	1015	342	334	337	312
										944	2465	2473	2494	2480	2405	2379	2479	2563	2408	2464	1844	1723	1730	1737	1770	212	200	182	187	188	1760	1814	1826	1861	1844	1572	1642	1601	1571	1583	995	967	981	1014	1017	344	334	337	312
										945	2475	2483	2503	2490	2414	2388	2488	2571	2416	2472	1851	1728	1736	1744	1775	212	200	182	187	189	1765	1821	1832	1866	1851	1578	1649	1606	1577	1589	998	968	985	1016	1020	344	335	338	313
										946	2484	2493	2513	2501	2423	2396	2497	2579	2423	2481	1857	1734	1742	1749	1781	213	200	182	187	190	1772	1828	1840	1872	1858	1584	1655	1611	1582	1594	1001	971	988	1018	1024	345	336	339	314
										947	2492	2503	2522	2509	2432	2405	2506	2589	2432	2489	1864	1740	1748	1756	1788	213	200	182	187	190	1777	1834	1845	1877	1865	1591	1661	1615	1587	1599	1004	974	991	1020	1025	346	336	340	315
										948	2500	2511	2531	2519	2442	2414	2514	2596	2440	2497	1871	1746	1753	1761	1796	213	201	182	188	190	1783	1839	1852	1881	1870	1596	1666	1623	1594	1604	1006	975	994	1022	1028	347	338	341	315
										949	2510	2521	2540	2528	2451	2423	2522	2605	2450	2506	1878	1753	1761	1766	1803	213	201	182	189	190	1789	1845	1858	1886	1877	1602	1671	1627	1598	1610	1009	978	996	1026	1031	348	338	342	315
										950	2520	2531	2551	2537	2459	2433	2531	2615	2458	2514	1885	1758	1767	1773	1808	214	201	182	189	190	1794	1851	1865	1893	1882	1608	1679	1632	1603	1616	1011	981	999	1029	1033	349	339	343	316
										951	2530	2540	2560	2545	2467	2441	2539	2626	2467	2525	1890	1763	1775	1779	1815	214	201	183	189	191	1798	1857	1869	1899	1888	1614	1684	1637	1606	1621	1014	984	1001	1031	1036	350	340	343	317
										952	2541	2549	2568	2555	2477	2449	2549	2635	2475	2535	1897	1769	1780	1784	1819	214	202	183	190	191	1806	1863	1875	1908	1893	1618	1690	1641	1613	1625	1017	987	1004	1034	1039	351	340	344	318
										953	2550	2557	2578	2564	2486	2458	2558	2645	2484	2544	1904	1775	1786	1790	1826	215	202	183	190	192	1812	1869	1881	1913	1899	1624	1696	1645	1616	1629	1020	990	1007	1036	1042	352	341	344	318
										954	2559	2566	2587	2572	2494	2467	2567	2654	2493	2552	1911	1781	1792	1796	1830	215	202	183	190	192	1817	1874	1887	1921	1904	1630	1701	1651	1621	1633	1024	992	1009	1039	1045	352	343	345	319
										955	2568	2578	2597	2581	2503	2478	2576	2662	2501	2561	1917	1787	1797	1802	1837	215	202	184	190	192	1823	1881	1892	1926	1910	1635	1706	1655	1626	1638	1027	994	1012	1043	1048	353	343	346	320
										956	2577	2588	2605	2591	2512	2487	2584	2673	2510	2570	1925	1793	1803	1809	1844	216	203	184	190	193	1829	1887	1897	1933	1915	1641	1712	1659	1631	1643	1030	997	1016	1045	1050	354	344	346	321
										957	2586	2596	2616	2599	2522	2496	2595	2685	2519	2582	1930	1799	1811	1815	1852	216	203	184	190	193	1835	1893	1903	1940	1920	1646	1717	1664	1635	1648	1033	999	1018	1048	1053	355	346	347	322
										958	2596	2607	2626	2609	2531	2504	2605	2695	2528	2588	1936	1805	1816	1821	1859	217	204	184	191	194	1842	1899	1908	1946	1927	1650	1723	1669	1640	1653	1034	1001	1020	1051	1056	356	347	348	323
										959	2605	2616	2636	2617	2541	2512	2613	2705	2538	2597	1940	1811	1824	1830	1864	217	204	185	192	194	1848	1906	1913	1952	1933	1655	1729	1674	1645	1658	1038	1002	1023	1054	1058	356	347	349	323
										960	2616	2625	2647	2627	2548	2520	2623	2714	2547	2606	1947	1818	1830	1836	1870	217	204	185	192	194	1854	1914	1919	1957	1940	1662	1735	1678	1650	1665	1041	1005	1025	1057	1060	357	348	350	324
										961	2625	2634	2657	2637	2558	2528	2632	2725	2557	2615	1953	1823	1835	1842	1877	217	205	185	192	194	1860	1918	1926	1965	1945	1667	1739	1683	1657	1670	1044	1007	1028	1060	1063	358	348	350	325
										962	2635	2646	2666	2646	2567	2537	2642	2734	2566	2622	1960	1829	1841	1848	1884	218	206	185	193	195	1867	1924	1932	1972	1951	1672	1746	1687	1663	1674	1047	1011	1033	1063	1065	358	350	351	327
										963	2646	2657	2677	2656	2577	2545	2651	2743	2575	2632	1967	1835	1848	1854	1889	218	206	185	193	195	1874	1930	1937	1978	1957	1678	1752	1693	1668	1681	1050	1013	1037	1066	1068	360	351	353	328
										964	2655	2667	2686	2666	2586	2554	2659	2753	2583	2640	1972	1841	1854	1861	1896	219	206	186	194	196	1879	1937	1943	1984	1963	1683	1757	1697	1673	1686	1053	1015	1039	1069	1071	360	351	354	329
										965	2664	2677	2696	2676	2597	2563	2668	2762	2592	2648	1978	1846	1861	1868	1902	219	206	186	194	196	1886	1945	1949	1991	1969	1688	1762	1703	1680	1691	1056	1019	1041	1072	1075	362	352	354	329
										966	2675	2687	2707	2687	2608	2572	2677	2771	2602	2657	1983	1852	1868	1874	1909	219	206	186	194	197	1894	1954	1954	1998	1974	1694	1767	1708	1685	1698	1059	1021	1044	1074	1079	363	352	355	331
										967	2683	2697	2717	2697	2615	2581	2686	2782	2612	2667	1990	1859	1875	1880	1915	219	207	187	194	197	1901	1961	1960	2007	1978	1699	1774	1715	1690	1703	1062	1024	1048	1076	1082	365	353	356	331
										968	2694	2708	2726	2708	2623	2588	2695	2790	2621	2678	1998	1866	1881	1885	1921	220	207	187	194	197	1907	1968	1966	2014	1986	1706	1778	1721	1696	1708	1066	1027	1051	1078	1086	366	353	358	332
										969	2704	2717	2735	2719	2633	2598	2703	2799	2630	2688	2005	1872	1888	1892	1928	221	208	187	194	198	1914	1974	1974	2021	1991	1711	1784	1727	1700	1715	1069	1032	1055	1082	1089	367	354	358	333
										970	2713	2726	2746	2728	2642	2608	2713	2811	2640	2697	2012	1878	1896	1897	1935	222	208	187	195	198	1920	1980	1980	2028	1996	1716	1790	1733	1705	1719	1071	1035	1058	1085	1091	368	355	359	333
										971	2722	2736	2756	2737	2654	2615	2724	2821	2649	2706	2019	1885	1902	1903	1942	222	208	188	195	198	1926	1986	1986	2034	2003	1723	1795	1737	1709	1725	1074	1039	1061	1087	1094	368	356	359	333
										972	2733	2746	2766	2748	2663	2623	2735	2830	2658	2716	2025	1893	1908	1908	1948	222	209	188	195	199	1932	1993	1993	2040	2009	1729	1802	1743	1715	1731	1077	1043	1063	1090	1098	370	356	360	334
										973	2742	2758	2775	2758	2672	2633	2744	2839	2667	2726	2033	1899	1915	1915	1957	223	209	188	196	199	1939	1999	1998	2046	2015	1734	1807	1747	1719	1736	1080	1045	1066	1093	1101	370	357	361	335
										974	2752	2768	2785	2769	2684	2641	2752	2852	2678	2736	2039	1905	1923	1923	1964	223	210	189	196	200	1946	2006	2004	2051	2023	1739	1813	1754	1723	1740	1084	1048	1068	1096	1104	372	358	362	335
										975	2765	2777	2797	2780	2694	2651	2762	2861	2688	2746	2046	1911	1929	1928	1970	223	210	190	196	200	1953	2012	2010	2058	2029	1744	1820	1760	1728	1747	1087	1051	1071	1100	1107	373	358	363	336
										976	2776	2785	2807	2791	2706	2661	2772	2870	2699	2757	2054	1918	1935	1935	1978	224	210	191	196	202	1958	2018	2017	2064	2037	1749	1825	1766	1736	1752	1091	1055	1074	1103	1111	374	359	364	337
										977	2786	2794	2819	2801	2715	2672	2782	2880	2710	2766	2061	1925	1941	1941	1983	225	211	192	196	202	1965	2025	2024	2070	2043	1754	1831	1772	1741	1757	1094	1057	1077	1106	1115	375	360	365	337
										978	2796	2804	2830	2813	2727	2681	2792	2890	2719	2776	2068	1932	1947	1947	1991	226	211	192	197	202	1971	2032	2031	2076	2050	1759	1837	1778	1747	1763	1098	1060	1080	1108	1119	376	361	366	338
										979	2807	2815	2841	2821	2736	2693	2801	2901	2731	2786	2075	1939	1953	1955	1996	227	211	192	197	203	1976	2039	2037	2081	2057	1766	1845	1784	1753	1769	1101	1064	1084	1112	1123	377	362	367	339
										980	2818	2824	2852	2831	2745	2703	2812	2911	2743	2794	2082	1948	1959	1962	2002	227	212	193	197	203	1982	2046	2045	2087	2064	1774	1851	1790	1759	1775	1103	1067	1087	1115	1126	378	363	368	340
										981	2827	2834	2862	2842	2757	2712	2821	2923	2754	2804	2088	1953	1965	1969	2007	228	212	193	197	203	1989	2052	2051	2093	2070	1779	1859	1796	1766	1780	1107	1070	1090	1116	1129	378	364	370	341
										982	2837	2844	2871	2854	2767	2721	2830	2935	2765	2814	2096	1959	1972	1975	2014	228	213	193	197	203	1997	2061	2057	2101	2077	1785	1866	1801	1772	1785	1111	1074	1095	1119	1133	379	364	371	342
										983	2846	2856	2880	2866	2777	2731	2838	2946	2777	2823	2105	1967	1979	1983	2022	229	213	193	198	203	2004	2066	2065	2108	2084	1792	1872	1807	1779	1791	1113	1076	1097	1123	1136	379	365	372	343
										984	2856	2864	2889	2875	2785	2742	2848	2958	2785	2832	2112	1973	1987	1990	2029	229	213	193	198	204	2009	2074	2072	2115	2090	1797	1878	1815	1786	1797	1117	1079	1100	1126	1139	379	367	373	343
										985	2868	2875	2900	2887	2797	2751	2858	2967	2794	2844	2119	1979	1993	1996	2035	229	214	193	198	204	2015	2079	2077	2122	2097	1802	1885	1822	1790	1804	1119	1082	1102	1129	1143	380	367	374	343
										986	2881	2885	2912	2896	2808	2761	2868	2976	2805	2853	2128	1986	1998	2003	2042	229	214	194	199	205	2022	2087	2084	2129	2104	1808	1891	1827	1796	1810	1121	1085	1106	1133	1146	381	368	374	344
										987	2891	2894	2924	2907	2818	2771	2878	2987	2817	2864	2134	1994	2004	2010	2048	229	214	194	199	205	2028	2093	2091	2134	2111	1815	1896	1833	1801	1816	1125	1088	1109	1136	1148	382	369	376	345
										988	2901	2904	2936	2919	2830	2779	2887	2999	2828	2875	2139	1999	2011	2015	2057	230	215	194	200	205	2036	2101	2097	2141	2117	1820	1902	1838	1807	1822	1129	1090	1112	1140	1151	383	370	377	346
										989	2911	2914	2946	2930	2842	2790	2897	3011	2841	2885	2148	2005	2017	2021	2066	230	215	195	200	206	2041	2108	2107	2147	2121	1825	1910	1844	1812	1827	1131	1094	1115	1143	1155	383	371	377	346
										990	2920	2925	2956	2942	2853	2801	2907	3021	2854	2896	2155	2012	2022	2028	2073	230	215	195	200	206	2044	2115	2113	2155	2129	1829	1916	1850	1817	1834	1135	1097	1118	1144	1159	384	372	378	347
										991	2931	2935	2968	2953	2863	2811	2917	3032	2865	2908	2164	2018	2028	2035	2079	230	216	195	201	206	2050	2121	2119	2161	2138	1834	1923	1855	1824	1838	1138	1101	1121	1147	1163	385	373	378	348
										992	2942	2945	2980	2965	2874	2822	2928	3043	2876	2921	2171	2026	2036	2044	2086	231	216	195	201	206	2057	2130	2126	2166	2146	1837	1929	1861	1830	1843	1142	1105	1126	1150	1165	385	374	379	348
										993	2953	2955	2992	2976	2885	2833	2939	3052	2887	2932	2180	2034	2042	2051	2092	231	216	195	201	207	2062	2135	2132	2173	2153	1843	1935	1866	1836	1849	1145	1108	1129	1152	1170	386	375	380	348
										994	2964	2964	3002	2986	2897	2844	2952	3063	2897	2943	2187	2042	2049	2060	2100	232	217	196	201	207	2069	2141	2138	2180	2159	1849	1941	1873	1842	1854	1148	1111	1132	1156	1173	387	376	382	349
										995	2975	2976	3014	3000	2906	2853	2963	3073	2907	2951	2195	2050	2056	2067	2107	232	217	196	202	207	2076	2148	2146	2187	2165	1854	1948	1879	1847	1859	1151	1113	1136	1160	1176	388	376	383	351
										996	2986	2988	3027	3013	2916	2863	2974	3084	2917	2961	2203	2058	2063	2073	2114	233	218	197	203	208	2083	2155	2154	2194	2172	1859	1951	1885	1853	1864	1154	1116	1138	1163	1181	389	377	384	351
										997	2999	3000	3037	3023	2927	2872	2985	3095	2928	2973	2210	2065	2069	2081	2123	233	218	197	203	208	2088	2162	2161	2202	2180	1865	1958	1892	1859	1871	1155	1118	1140	1166	1185	390	379	385	352
										998	3009	3012	3050	3035	2939	2882	2997	3107	2938	2986	2216	2071	2076	2089	2129	234	218	197	203	208	2097	2169	2167	2209	2187	1871	1963	1899	1864	1878	1160	1120	1143	1171	1189	391	380	386	354
										999	3019	3022	3063	3046	2950	2892	3009	3118	2948	2998	2224	2080	2081	2096	2136	234	219	198	203	209	2103	2176	2174	2217	2194	1876	1971	1905	1869	1884	1164	1124	1146	1173	1194	392	381	387	354
										1000	3029	3032	3075	3057	2959	2904	3019	3129	2959	3008	2233	2085	2089	2103	2143	234	219	198	203	209	2109	2183	2181	2225	2201	1882	1978	1909	1875	1891	1167	1127	1149	1176	1197	392	381	388	355
										1001	3042	3043	3086	3068	2970	2915	3031	3141	2969	3020	2242	2091	2096	2110	2149	235	220	198	204	210	2116	2191	2187	2232	2209	1888	1986	1915	1881	1897	1172	1130	1154	1179	1201	393	382	389	356
										1002	3055	3053	3097	3080	2981	2925	3042	3153	2980	3030	2247	2098	2103	2119	2155	235	220	199	204	210	2125	2197	2196	2238	2219	1893	1993	1921	1887	1902	1174	1133	1158	1182	1204	395	383	390	357
										1003	3065	3062	3108	3093	2993	2935	3052	3165	2993	3042	2255	2105	2109	2126	2163	236	220	199	205	210	2131	2202	2203	2245	2225	1901	2000	1928	1893	1908	1178	1137	1161	1186	1208	396	384	391	358
										1004	3076	3073	3119	3105	3003	2947	3063	3178	3003	3052	2263	2113	2117	2134	2171	237	221	199	205	210	2137	2209	2212	2254	2231	1907	2006	1933	1898	1915	1180	1140	1164	1189	1212	397	385	392	359
										1005	3087	3084	3131	3116	3014	2957	3074	3189	3014	3063	2270	2119	2124	2141	2180	237	221	200	205	211	2144	2215	2219	2261	2239	1913	2013	1941	1904	1920	1183	1144	1167	1192	1214	398	387	393	360
										1006	3098	3096	3143	3126	3025	2970	3085	3200	3024	3074	2277	2125	2131	2149	2188	237	222	201	206	212	2151	2223	2227	2268	2245	1918	2020	1947	1909	1927	1186	1145	1170	1196	1218	399	388	394	361
										1007	3111	3104	3158	3137	3037	2981	3097	3212	3035	3084	2285	2132	2138	2157	2195	237	221	201	206	212	2158	2230	2234	2277	2253	1924	2026	1953	1914	1933	1189	1149	1174	1199	1221	400	389	395	362
										1008	3123	3115	3171	3149	3047	2992	3112	3226	3047	3096	2295	2139	2146	2165	2202	238	222	202	206	212	2165	2239	2241	2284	2260	1930	2032	1958	1921	1941	1192	1152	1177	1202	1225	402	390	396	364
										1009	3135	3127	3182	3161	3056	3004	3123	3237	3059	3108	2303	2146	2152	2172	2209	238	223	202	207	213	2173	2248	2246	2291	2267	1935	2039	1964	1927	1947	1195	1158	1179	1205	1229	403	391	396	365
										1010	3147	3139	3196	3174	3065	3016	3134	3248	3069	3120	2310	2154	2159	2181	2217	238	223	202	207	213	2179	2256	2252	2298	2274	1942	2045	1969	1935	1952	1198	1162	1181	1208	1233	404	392	398	365
										1011	3157	3154	3208	3185	3075	3026	3146	3257	3080	3131	2316	2161	2166	2188	2225	239	223	203	207	214	2186	2263	2259	2306	2280	1949	2050	1977	1941	1958	1201	1165	1184	1213	1236	405	392	399	367
										1012	3169	3165	3220	3196	3086	3038	3157	3271	3090	3140	2325	2167	2174	2195	2231	239	224	204	208	214	2192	2269	2267	2312	2289	1955	2055	1984	1948	1963	1205	1167	1188	1215	1238	406	393	401	368
										1013	3181	3178	3232	3210	3098	3050	3168	3283	3102	3152	2333	2177	2180	2203	2238	241	224	204	208	214	2199	2279	2273	2318	2295	1960	2062	1988	1954	1969	1208	1171	1190	1219	1242	407	395	402	369
										1014	3193	3189	3244	3222	3109	3062	3180	3295	3113	3165	2340	2184	2186	2210	2246	241	225	204	208	214	2205	2286	2279	2324	2301	1968	2068	1994	1957	1976	1211	1174	1194	1221	1245	408	396	402	370
										1015	3204	3201	3257	3236	3119	3077	3191	3305	3125	3174	2350	2191	2193	2218	2253	241	225	205	209	215	2214	2295	2286	2332	2308	1975	2074	2004	1963	1984	1213	1178	1198	1225	1249	408	397	403	370
										1016	3215	3216	3272	3247	3130	3086	3202	3317	3135	3186	2358	2197	2200	2225	2259	242	226	205	209	215	2219	2302	2294	2340	2315	1980	2080	2010	1967	1990	1217	1181	1201	1229	1252	409	398	404	371
										1017	3228	3230	3282	3258	3142	3100	3217	3330	3147	3198	2365	2204	2207	2233	2267	242	226	206	210	215	2227	2306	2303	2348	2322	1987	2087	2018	1973	1997	1220	1185	1205	1232	1256	410	399	405	371
										1018	3239	3241	3294	3270	3153	3112	3229	3343	3160	3211	2373	2213	2215	2242	2276	242	227	206	210	216	2233	2314	2309	2354	2328	1994	2094	2025	1980	2003	1223	1188	1210	1235	1259	411	401	405	372
										1019	3253	3253	3304	3282	3165	3124	3238	3354	3171	3223	2382	2220	2222	2248	2285	242	227	207	211	216	2240	2321	2316	2361	2335	2000	2102	2032	1985	2009	1226	1191	1213	1239	1262	413	401	406	373
										1020	3267	3265	3316	3293	3176	3135	3249	3365	3183	3237	2390	2229	2230	2257	2293	243	228	207	211	216	2247	2330	2323	2369	2344	2005	2107	2038	1991	2016	1229	1194	1215	1245	1267	413	401	407	374
										1021	3279	3278	3327	3306	3188	3146	3260	3376	3195	3249	2399	2236	2238	2264	2301	243	229	207	211	217	2254	2337	2331	2379	2353	2011	2114	2045	1996	2021	1233	1198	1219	1247	1271	414	403	409	374
										1022	3291	3289	3338	3317	3198	3157	3270	3388	3204	3260	2406	2243	2246	2272	2308	243	229	208	212	217	2262	2343	2338	2387	2360	2018	2121	2050	2003	2027	1235	1201	1222	1251	1274	415	404	410	376
										1023	3301	3301	3350	3328	3212	3169	3280	3401	3216	3274	2415	2250	2254	2279	2318	244	230	208	212	217	2270	2350	2347	2394	2369	2024	2127	2057	2010	2033	1239	1204	1226	1254	1278	416	405	410	377
										1024	3313	3316	3365	3339	3224	3182	3290	3415	3230	3286	2423	2257	2262	2286	2327	244	230	208	213	218	2279	2357	2355	2404	2376	2032	2135	2063	2017	2039	1242	1206	1229	1258	1282	416	405	411	379
										1025	3325	3330	3375	3352	3235	3195	3304	3428	3242	3297	2430	2263	2271	2294	2333	244	230	208	213	218	2289	2363	2363	2412	2385	2038	2142	2068	2024	2046	1245	1208	1232	1263	1285	417	406	412	379
										1026	3338	3343	3389	3365	3246	3203	3314	3440	3252	3310	2439	2270	2278	2301	2341	244	230	208	213	218	2297	2372	2372	2419	2394	2045	2148	2074	2032	2052	1249	1212	1238	1267	1288	418	407	412	380
										1027	3349	3357	3402	3378	3257	3214	3325	3453	3264	3323	2446	2278	2287	2308	2348	244	231	209	214	218	2304	2381	2380	2427	2403	2053	2153	2079	2038	2058	1253	1216	1242	1270	1291	419	407	413	381
										1028	3362	3368	3415	3391	3270	3226	3337	3466	3275	3335	2454	2286	2294	2317	2356	244	231	209	214	219	2310	2387	2388	2434	2412	2061	2160	2083	2043	2064	1257	1220	1246	1275	1294	420	409	414	383
										1029	3374	3379	3427	3404	3283	3237	3348	3479	3287	3348	2461	2293	2299	2325	2365	245	231	209	215	219	2317	2394	2396	2441	2421	2067	2167	2090	2049	2071	1261	1222	1249	1278	1297	420	410	415	384
										1030	3388	3391	3439	3415	3295	3249	3362	3490	3299	3360	2471	2301	2307	2332	2374	245	232	210	216	220	2323	2402	2405	2450	2431	2075	2173	2096	2054	2076	1264	1224	1252	1281	1302	422	411	417	385
										1031	3401	3405	3451	3429	3306	3261	3374	3502	3311	3374	2480	2309	2313	2337	2382	246	233	210	216	220	2330	2411	2413	2459	2438	2081	2178	2103	2061	2082	1268	1228	1257	1284	1306	422	412	417	385
										1032	3412	3417	3462	3440	3318	3271	3385	3515	3322	3387	2488	2316	2321	2346	2389	246	233	211	217	221	2337	2419	2422	2465	2448	2086	2186	2109	2068	2088	1271	1231	1260	1288	1310	423	413	418	387
										1033	3425	3431	3476	3451	3330	3283	3398	3526	3333	3400	2496	2325	2330	2354	2398	247	234	211	218	221	2343	2429	2428	2474	2457	2093	2193	2117	2073	2097	1274	1235	1264	1291	1312	423	414	419	387
										1034	3437	3445	3489	3463	3345	3295	3412	3540	3345	3412	2505	2333	2339	2362	2407	247	234	211	218	222	2349	2438	2437	2484	2464	2100	2200	2123	2079	2103	1278	1238	1268	1295	1315	424	415	420	389
										1035	3448	3456	3502	3475	3360	3307	3423	3552	3356	3425	2514	2342	2347	2371	2416	247	235	212	218	222	2357	2444	2445	2492	2474	2106	2209	2129	2086	2110	1281	1241	1273	1299	1319	426	416	421	389
										1036	3460	3467	3516	3488	3370	3319	3435	3563	3365	3436	2521	2351	2356	2379	2426	248	235	213	218	222	2365	2452	2451	2500	2483	2112	2216	2135	2093	2115	1285	1244	1278	1303	1323	427	418	422	390
										1037	3473	3480	3530	3503	3383	3330	3448	3578	3377	3450	2528	2356	2362	2388	2433	248	236	213	218	222	2372	2461	2458	2509	2491	2118	2223	2141	2100	2121	1288	1247	1281	1307	1327	428	418	423	390
										1038	3486	3491	3544	3517	3397	3343	3462	3592	3389	3464	2535	2367	2371	2396	2442	248	236	214	219	223	2380	2468	2466	2518	2498	2124	2230	2149	2106	2128	1291	1250	1283	1312	1330	429	420	424	391
										1039	3499	3505	3554	3530	3408	3354	3476	3606	3404	3477	2545	2375	2379	2405	2450	249	236	214	219	223	2388	2474	2474	2526	2506	2130	2237	2156	2112	2136	1295	1253	1286	1314	1333	430	422	425	392
										1040	3510	3519	3565	3545	3422	3366	3489	3622	3414	3492	2552	2382	2386	2415	2457	250	238	214	219	224	2395	2482	2482	2534	2512	2138	2244	2163	2117	2143	1298	1255	1289	1317	1338	431	423	426	393
										1041	3524	3532	3577	3558	3436	3376	3501	3633	3428	3509	2561	2392	2393	2422	2469	250	239	215	219	224	2402	2491	2490	2543	2521	2144	2251	2171	2124	2149	1302	1260	1293	1320	1343	432	423	427	394
										1042	3538	3545	3589	3572	3451	3387	3515	3645	3439	3521	2571	2401	2401	2431	2476	250	239	215	220	225	2411	2500	2499	2553	2528	2152	2259	2176	2131	2156	1307	1263	1299	1324	1346	433	424	428	395
										1043	3550	3558	3604	3585	3463	3398	3525	3659	3452	3534	2580	2409	2409	2439	2483	251	239	215	220	225	2419	2508	2507	2561	2537	2158	2266	2183	2137	2162	1310	1267	1302	1328	1351	434	425	429	396
										1044	3565	3571	3616	3598	3476	3409	3539	3673	3463	3546	2589	2417	2417	2446	2491	251	239	215	220	225	2428	2515	2515	2570	2545	2167	2273	2189	2142	2171	1313	1270	1305	1333	1355	434	426	430	397
										1045	3578	3585	3628	3613	3490	3421	3554	3685	3474	3559	2597	2424	2424	2453	2499	251	240	215	221	225	2435	2523	2523	2579	2554	2173	2280	2194	2149	2178	1317	1273	1309	1336	1358	435	427	431	397
										1046	3590	3599	3641	3625	3506	3434	3566	3697	3487	3571	2605	2432	2433	2461	2507	252	240	215	222	225	2444	2531	2531	2589	2562	2181	2288	2201	2155	2186	1320	1277	1311	1340	1361	436	428	432	398
										1047	3601	3610	3655	3638	3519	3446	3580	3711	3500	3586	2614	2442	2443	2468	2517	252	241	216	222	226	2452	2539	2538	2596	2568	2187	2294	2210	2162	2196	1323	1280	1315	1343	1366	436	429	433	399
										1048	3616	3624	3667	3651	3533	3457	3593	3723	3512	3597	2624	2452	2452	2476	2526	253	242	217	222	226	2460	2546	2549	2605	2577	2195	2299	2217	2171	2203	1326	1283	1318	1347	1369	437	431	433	401
										1049	3630	3638	3681	3665	3548	3469	3609	3738	3525	3611	2633	2459	2461	2483	2534	253	242	217	223	226	2467	2554	2557	2612	2585	2200	2306	2226	2178	2210	1328	1287	1321	1350	1372	438	432	435	402
										1050	3643	3652	3693	3679	3561	3481	3622	3749	3539	3623	2642	2468	2469	2491	2541	254	242	218	223	227	2476	2562	2565	2620	2594	2207	2312	2232	2185	2217	1332	1291	1325	1355	1377	439	433	435	403
										1051	3655	3665	3707	3692	3574	3496	3633	3762	3551	3636	2650	2478	2476	2500	2550	254	243	218	223	227	2485	2571	2574	2631	2602	2213	2319	2239	2192	2223	1336	1295	1330	1359	1381	440	434	436	404
										1052	3671	3679	3721	3706	3586	3509	3646	3775	3563	3649	2659	2488	2482	2508	2559	255	243	219	224	228	2491	2579	2581	2638	2609	2220	2328	2247	2199	2230	1339	1298	1334	1362	1384	441	435	437	405
										1053	3684	3692	3735	3721	3600	3523	3656	3787	3576	3662	2667	2497	2490	2518	2567	256	244	219	225	228	2499	2586	2588	2645	2620	2226	2336	2255	2207	2239	1342	1302	1337	1365	1387	442	437	438	405
										1054	3698	3708	3749	3733	3614	3536	3668	3801	3590	3674	2675	2506	2498	2526	2577	257	244	219	225	228	2507	2593	2598	2655	2629	2232	2343	2263	2215	2245	1347	1305	1340	1371	1390	443	438	439	407
										1055	3710	3721	3763	3748	3627	3547	3681	3817	3604	3688	2683	2513	2508	2535	2586	257	245	219	226	229	2516	2603	2607	2665	2638	2240	2351	2271	2222	2253	1350	1308	1343	1374	1395	443	439	440	408
										1056	3722	3735	3776	3763	3641	3560	3695	3833	3618	3702	2692	2522	2515	2543	2594	257	245	220	226	229	2524	2611	2616	2675	2644	2247	2358	2276	2227	2262	1353	1311	1347	1377	1399	444	440	441	409
										1057	3736	3750	3791	3776	3654	3572	3709	3848	3628	3714	2703	2530	2523	2552	2602	258	245	220	226	229	2534	2618	2624	2684	2652	2253	2366	2280	2234	2268	1356	1314	1350	1380	1401	445	441	442	410
										1058	3750	3764	3806	3788	3667	3585	3723	3863	3640	3726	2711	2538	2530	2558	2611	258	246	221	226	230	2540	2625	2634	2691	2662	2261	2374	2289	2239	2274	1361	1317	1354	1384	1405	446	442	442	411
										1059	3763	3780	3822	3802	3681	3598	3736	3876	3653	3739	2719	2545	2538	2566	2620	259	246	221	226	230	2550	2634	2643	2700	2674	2268	2382	2297	2246	2281	1365	1321	1358	1389	1409	447	442	442	412
										1060	3779	3793	3832	3816	3694	3609	3750	3890	3664	3753	2730	2555	2548	2574	2627	259	246	221	227	231	2559	2642	2654	2709	2682	2275	2391	2304	2252	2287	1368	1325	1362	1393	1412	448	443	444	412
										1061	3794	3805	3844	3831	3709	3623	3761	3903	3676	3765	2740	2563	2557	2581	2637	260	247	221	227	231	2569	2648	2662	2719	2690	2283	2398	2311	2259	2294	1372	1329	1366	1398	1416	450	444	446	414
										1062	3808	3818	3858	3844	3724	3637	3773	3916	3690	3779	2750	2572	2566	2589	2646	261	247	222	228	231	2579	2657	2672	2728	2701	2290	2406	2319	2267	2300	1375	1334	1370	1403	1419	451	444	446	414
										1063	3821	3833	3871	3859	3737	3650	3789	3932	3703	3793	2760	2578	2575	2601	2656	261	248	222	228	232	2589	2665	2684	2737	2710	2297	2413	2327	2276	2308	1380	1337	1375	1407	1423	452	444	448	416
										1064	3834	3846	3885	3872	3753	3664	3800	3945	3715	3806	2769	2589	2583	2609	2666	262	248	222	228	232	2599	2674	2693	2746	2719	2305	2420	2333	2285	2315	1384	1341	1377	1410	1426	453	446	449	416
										1065	3846	3858	3902	3890	3768	3678	3813	3961	3729	3819	2779	2598	2592	2618	2673	263	248	222	229	233	2608	2682	2701	2755	2727	2313	2428	2340	2291	2322	1388	1345	1380	1415	1430	454	447	449	417
										1066	3859	3871	3918	3903	3783	3692	3828	3975	3743	3832	2789	2607	2601	2627	2682	264	249	223	229	233	2615	2691	2710	2766	2735	2321	2436	2347	2298	2331	1391	1347	1385	1419	1434	455	447	450	418
										1067	3873	3887	3933	3918	3796	3703	3842	3988	3758	3846	2798	2615	2609	2635	2693	264	250	223	230	234	2624	2700	2719	2776	2745	2327	2443	2354	2307	2337	1395	1352	1389	1423	1437	456	449	452	419
										1068	3889	3899	3947	3933	3811	3716	3856	4003	3773	3858	2808	2623	2618	2644	2703	265	251	224	230	235	2632	2710	2728	2785	2753	2334	2452	2361	2314	2345	1399	1355	1393	1428	1441	457	450	453	420
										1069	3903	3914	3963	3948	3825	3729	3870	4018	3785	3872	2818	2633	2627	2651	2710	265	251	224	230	236	2641	2719	2736	2792	2763	2342	2461	2370	2321	2352	1403	1357	1396	1432	1447	458	451	454	421
										1070	3917	3929	3979	3964	3837	3743	3884	4030	3796	3887	2828	2641	2635	2661	2719	266	252	224	231	236	2647	2727	2745	2800	2773	2348	2469	2377	2328	2359	1407	1359	1400	1437	1450	459	452	455	421
										1071	3933	3944	3992	3979	3851	3758	3898	4045	3809	3901	2837	2651	2643	2671	2730	266	252	225	232	237	2657	2736	2754	2808	2781	2356	2476	2384	2336	2367	1412	1363	1404	1440	1455	460	453	457	422
										1072	3949	3959	4008	3993	3866	3772	3912	4057	3824	3916	2846	2660	2651	2679	2738	267	253	225	232	238	2666	2745	2761	2819	2791	2362	2485	2392	2344	2376	1415	1368	1408	1444	1459	462	453	458	424
										1073	3964	3972	4025	4009	3881	3786	3926	4072	3838	3928	2856	2669	2660	2690	2747	268	253	225	232	238	2674	2754	2769	2828	2801	2369	2494	2401	2350	2384	1419	1372	1410	1448	1463	463	454	459	424
										1074	3979	3985	4040	4025	3894	3797	3941	4087	3849	3942	2866	2679	2670	2697	2757	268	253	225	233	239	2686	2763	2776	2837	2809	2377	2502	2408	2358	2393	1424	1376	1414	1451	1468	464	456	461	425
										1075	3994	3997	4056	4044	3910	3811	3954	4102	3864	3957	2875	2689	2680	2705	2766	269	253	226	233	239	2693	2772	2786	2845	2818	2383	2509	2414	2364	2399	1428	1379	1417	1455	1472	465	456	462	426
										1076	4010	4011	4070	4059	3925	3824	3970	4119	3878	3970	2887	2697	2689	2714	2778	269	254	226	233	239	2702	2781	2794	2855	2827	2391	2516	2424	2372	2407	1431	1384	1420	1459	1475	467	457	464	428
										1077	4026	4026	4086	4072	3939	3838	3984	4132	3888	3982	2898	2705	2697	2724	2787	271	254	227	233	240	2711	2791	2803	2863	2836	2399	2525	2431	2380	2415	1435	1387	1425	1464	1479	468	458	465	428
										1078	4041	4043	4101	4087	3953	3852	4000	4147	3902	3994	2910	2713	2708	2732	2797	271	255	228	233	240	2720	2800	2812	2872	2845	2406	2535	2439	2389	2423	1441	1392	1428	1467	1482	469	459	466	429
										1079	4058	4058	4116	4102	3967	3868	4014	4161	3914	4007	2920	2724	2718	2742	2808	271	255	228	233	241	2728	2809	2824	2881	2853	2415	2542	2449	2397	2431	1445	1395	1432	1470	1487	470	460	467	429
										1080	4071	4074	4129	4116	3983	3880	4028	4173	3927	4019	2932	2732	2726	2750	2819	272	255	229	234	241	2737	2819	2833	2891	2862	2422	2550	2458	2408	2438	1450	1399	1435	1474	1491	471	461	468	430
										1081	4086	4088	4146	4131	3998	3895	4042	4189	3941	4032	2942	2742	2734	2761	2827	273	256	229	235	241	2746	2827	2844	2901	2871	2430	2561	2466	2415	2447	1454	1404	1439	1478	1495	472	462	469	431
										1082	4100	4103	4160	4147	4011	3909	4056	4204	3954	4050	2951	2752	2744	2768	2835	273	257	230	235	241	2756	2835	2852	2910	2881	2437	2569	2475	2422	2456	1457	1409	1444	1481	1499	473	462	470	432
										1083	4116	4119	4175	4163	4025	3922	4071	4218	3968	4066	2962	2761	2753	2778	2844	273	257	230	235	242	2766	2845	2864	2920	2892	2445	2575	2481	2431	2464	1461	1412	1448	1485	1503	476	463	471	433
										1084	4129	4133	4192	4177	4040	3938	4085	4233	3984	4082	2972	2770	2763	2787	2853	274	258	230	236	242	2774	2854	2873	2928	2902	2452	2584	2488	2438	2474	1464	1416	1452	1489	1507	477	464	472	435
										1085	4146	4149	4208	4194	4059	3952	4101	4249	3999	4096	2982	2780	2773	2796	2863	275	258	231	236	243	2785	2867	2883	2939	2912	2459	2593	2496	2444	2482	1468	1420	1456	1493	1510	478	465	473	436
										1086	4163	4166	4223	4208	4074	3967	4113	4263	4013	4111	2992	2789	2783	2806	2874	275	258	231	236	244	2796	2878	2893	2946	2923	2466	2602	2503	2454	2490	1472	1425	1459	1498	1514	480	467	475	438
										1087	4179	4183	4239	4225	4088	3981	4128	4280	4027	4125	3003	2798	2794	2815	2882	276	259	232	236	244	2806	2887	2902	2955	2933	2473	2611	2510	2461	2499	1475	1429	1464	1501	1518	481	468	476	439
										1088	4193	4199	4254	4238	4105	3993	4142	4293	4040	4140	3012	2808	2804	2825	2893	276	260	233	237	244	2815	2895	2909	2964	2941	2479	2620	2518	2468	2507	1478	1433	1467	1505	1522	482	468	477	440
										1089	4205	4216	4269	4254	4122	4008	4155	4310	4054	4157	3022	2817	2813	2832	2901	277	261	233	237	244	2823	2902	2918	2973	2952	2487	2628	2525	2478	2515	1482	1437	1471	1508	1526	483	469	478	442
										1090	4220	4234	4285	4269	4138	4022	4170	4325	4069	4170	3032	2824	2824	2843	2911	277	261	234	238	244	2835	2912	2927	2983	2961	2496	2636	2533	2486	2523	1487	1441	1475	1512	1530	485	470	479	443
										1091	4236	4249	4302	4283	4154	4035	4183	4341	4085	4184	3043	2835	2834	2854	2922	278	261	234	239	245	2846	2923	2939	2994	2971	2503	2644	2541	2493	2532	1491	1444	1479	1517	1534	486	470	479	443
										1092	4253	4265	4318	4298	4169	4049	4198	4359	4101	4198	3053	2844	2844	2864	2932	278	261	235	239	245	2856	2932	2948	3002	2980	2511	2652	2548	2504	2539	1495	1448	1481	1522	1538	487	472	480	445
										1093	4269	4281	4333	4314	4184	4066	4212	4376	4116	4216	3063	2854	2853	2873	2943	279	262	235	240	246	2865	2942	2957	3013	2990	2521	2660	2556	2510	2548	1501	1453	1484	1526	1542	487	473	481	446
										1094	4283	4297	4351	4331	4199	4081	4228	4391	4131	4231	3072	2863	2862	2884	2953	279	262	236	240	246	2875	2951	2967	3024	2999	2530	2667	2564	2518	2557	1506	1457	1487	1529	1546	488	474	482	447
										1095	4300	4312	4367	4347	4215	4096	4247	4406	4148	4247	3081	2873	2873	2894	2963	279	262	236	240	246	2884	2961	2977	3031	3009	2539	2676	2573	2527	2565	1510	1462	1491	1534	1549	489	476	483	448
										1096	4314	4328	4383	4363	4232	4109	4263	4424	4162	4266	3092	2883	2881	2903	2974	280	262	236	241	246	2893	2971	2986	3043	3017	2549	2684	2583	2536	2574	1517	1465	1495	1537	1552	490	476	484	449
										1097	4329	4344	4399	4380	4249	4123	4279	4440	4177	4279	3104	2891	2892	2912	2984	281	262	237	241	247	2902	2980	2997	3054	3027	2557	2693	2593	2545	2582	1522	1468	1498	1542	1556	491	478	485	449
										1098	4346	4360	4416	4398	4265	4138	4294	4456	4190	4293	3115	2901	2901	2922	2995	281	263	237	242	247	2912	2990	3007	3064	3038	2565	2702	2601	2555	2592	1527	1472	1503	1546	1561	492	479	485	450
										1099	4362	4376	4432	4415	4282	4153	4311	4471	4205	4310	3125	2911	2911	2932	3003	282	263	237	242	248	2920	3002	3017	3074	3047	2572	2711	2611	2562	2599	1530	1476	1507	1550	1566	492	480	487	450
										1100	4377	4394	4447	4429	4297	4167	4326	4486	4220	4323	3134	2920	2921	2944	3013	282	264	237	243	249	2928	3012	3026	3083	3058	2581	2719	2618	2571	2607	1533	1480	1512	1556	1571	493	480	488	452
										1101	4394	4411	4462	4444	4314	4181	4340	4504	4234	4339	3144	2930	2932	2954	3024	283	264	237	243	249	2939	3020	3038	3093	3066	2590	2727	2624	2580	2616	1537	1485	1517	1561	1575	495	482	488	453
										1102	4411	4426	4481	4460	4332	4196	4355	4519	4248	4355	3155	2939	2941	2965	3034	284	265	238	244	249	2947	3027	3048	3105	3075	2598	2735	2633	2587	2628	1542	1490	1521	1566	1579	496	483	489	454
										1103	4428	4442	4494	4473	4348	4211	4372	4536	4264	4373	3166	2951	2952	2976	3044	284	265	239	245	250	2957	3038	3057	3117	3085	2607	2743	2642	2595	2636	1547	1492	1525	1571	1583	497	484	490	455
										1104	4443	4459	4511	4490	4364	4226	4386	4552	4281	4387	3176	2962	2960	2987	3057	285	266	239	245	251	2967	3049	3066	3129	3096	2617	2752	2649	2605	2643	1552	1495	1527	1577	1588	498	485	492	456
										1105	4461	4479	4526	4506	4381	4242	4402	4570	4296	4404	3185	2973	2969	2997	3064	286	266	240	246	252	2978	3059	3077	3138	3106	2625	2761	2658	2614	2649	1555	1499	1531	1582	1592	499	486	494	457
										1106	4476	4498	4542	4523	4397	4257	4416	4586	4315	4421	3195	2982	2979	3006	3074	286	267	240	246	252	2986	3069	3087	3148	3117	2634	2770	2668	2623	2659	1559	1502	1536	1586	1597	500	487	495	458
										1107	4492	4516	4558	4538	4414	4271	4433	4602	4329	4436	3206	2991	2989	3015	3084	287	267	241	246	252	2997	3081	3098	3159	3128	2645	2779	2678	2632	2666	1564	1506	1540	1588	1600	502	489	496	459
										1108	4507	4532	4574	4556	4431	4284	4449	4618	4344	4453	3217	2999	3000	3025	3096	288	268	241	246	253	3004	3091	3108	3169	3138	2654	2788	2688	2639	2674	1568	1510	1545	1594	1605	503	490	497	460
										1109	4523	4548	4592	4574	4444	4299	4465	4635	4360	4468	3229	3009	3011	3034	3105	288	269	241	247	253	3012	3100	3117	3180	3149	2662	2798	2696	2649	2684	1573	1513	1552	1598	1610	504	490	498	461
										1110	4540	4565	4610	4592	4460	4316	4481	4652	4375	4485	3239	3019	3021	3044	3115	289	269	241	247	253	3022	3112	3127	3191	3158	2670	2806	2705	2658	2693	1577	1518	1555	1602	1614	505	491	499	462
										1111	4558	4583	4628	4611	4475	4332	4498	4667	4391	4500	3252	3029	3031	3054	3126	290	270	242	247	254	3033	3122	3135	3203	3171	2680	2815	2714	2664	2701	1581	1522	1561	1607	1618	506	493	500	462
										1112	4575	4598	4644	4628	4490	4348	4514	4684	4405	4514	3262	3040	3041	3065	3135	290	270	242	248	254	3042	3132	3146	3215	3182	2688	2823	2722	2671	2709	1585	1526	1565	1612	1622	508	494	501	463
										1113	4591	4618	4663	4646	4505	4364	4531	4701	4419	4530	3273	3049	3050	3075	3146	291	270	242	248	254	3052	3141	3158	3226	3192	2695	2833	2731	2680	2717	1590	1529	1569	1617	1629	509	494	502	464
										1114	4610	4637	4680	4662	4521	4380	4547	4720	4437	4546	3284	3060	3061	3086	3157	291	270	242	248	255	3061	3149	3167	3238	3204	2706	2843	2740	2689	2726	1594	1534	1574	1622	1633	511	495	503	465
										1115	4628	4655	4698	4683	4538	4396	4562	4738	4453	4565	3294	3070	3068	3097	3169	291	271	243	248	255	3072	3159	3176	3248	3216	2716	2852	2749	2698	2734	1598	1540	1578	1627	1638	512	496	504	466
										1116	4646	4673	4716	4701	4554	4411	4578	4755	4470	4580	3305	3080	3079	3108	3179	292	272	243	249	256	3083	3171	3187	3257	3227	2724	2861	2758	2707	2744	1601	1543	1582	1631	1642	515	497	504	467
										1117	4663	4690	4735	4719	4571	4428	4593	4773	4488	4598	3317	3089	3091	3119	3189	293	273	243	249	256	3093	3181	3197	3266	3235	2734	2872	2768	2715	2752	1606	1548	1586	1635	1648	516	498	505	468
										1118	4680	4706	4754	4738	4590	4444	4610	4792	4504	4614	3328	3099	3103	3131	3200	293	273	244	250	257	3105	3191	3208	3276	3246	2745	2881	2777	2726	2761	1612	1552	1590	1640	1652	518	499	505	469
										1119	4698	4723	4767	4755	4606	4461	4628	4807	4519	4631	3340	3110	3114	3142	3211	293	274	244	250	257	3114	3203	3217	3287	3257	2756	2889	2784	2737	2769	1616	1557	1594	1644	1655	519	500	506	470
										1120	4717	4740	4784	4771	4625	4476	4643	4821	4536	4647	3349	3121	3125	3150	3222	294	275	245	250	258	3126	3214	3229	3299	3266	2764	2897	2795	2747	2779	1621	1561	1599	1648	1660	521	501	507	471
										1121	4733	4758	4802	4787	4639	4493	4659	4840	4551	4663	3360	3131	3135	3160	3232	295	275	247	251	259	3137	3224	3238	3308	3277	2773	2908	2801	2757	2789	1624	1567	1603	1653	1666	522	502	508	472
										1122	4750	4778	4820	4807	4655	4508	4674	4859	4566	4680	3371	3144	3145	3172	3245	296	276	247	251	260	3146	3234	3249	3317	3290	2781	2917	2810	2766	2797	1629	1570	1608	1658	1672	523	503	509	473
										1123	4769	4799	4841	4826	4672	4525	4690	4876	4583	4698	3383	3154	3156	3182	3255	297	276	247	252	261	3157	3246	3259	3329	3299	2791	2927	2822	2776	2807	1633	1574	1612	1663	1677	524	504	510	474
										1124	4788	4818	4859	4843	4689	4543	4707	4892	4600	4713	3394	3164	3168	3193	3268	298	276	247	252	261	3168	3258	3269	3340	3310	2801	2937	2832	2785	2816	1637	1580	1617	1667	1682	524	505	512	475
										1125	4807	4835	4879	4859	4706	4558	4723	4909	4616	4732	3403	3174	3180	3202	3279	298	277	248	253	262	3177	3268	3283	3353	3321	2809	2946	2839	2794	2824	1641	1585	1621	1672	1685	526	506	514	475
										1126	4824	4852	4896	4876	4725	4571	4740	4927	4632	4749	3416	3185	3190	3211	3290	299	278	248	253	262	3186	3279	3294	3365	3331	2820	2955	2847	2804	2835	1646	1589	1625	1676	1690	528	507	514	476
										1127	4844	4871	4914	4895	4742	4587	4755	4945	4648	4766	3426	3196	3199	3223	3302	299	278	248	254	262	3196	3292	3304	3377	3341	2830	2966	2859	2812	2844	1651	1594	1630	1680	1695	529	508	516	477
										1128	4862	4892	4932	4914	4762	4603	4772	4964	4663	4784	3438	3207	3214	3233	3310	300	278	248	254	263	3207	3302	3314	3389	3351	2839	2974	2868	2822	2856	1655	1597	1635	1684	1700	530	508	517	479
										1129	4881	4910	4950	4932	4778	4619	4789	4984	4682	4799	3447	3218	3224	3244	3319	300	279	248	254	264	3217	3313	3327	3398	3362	2849	2984	2877	2831	2864	1661	1602	1640	1689	1705	531	509	518	480
										1130	4897	4932	4970	4951	4795	4636	4807	5004	4700	4815	3462	3230	3237	3257	3329	301	279	249	254	264	3229	3326	3337	3413	3372	2860	2993	2888	2841	2872	1666	1607	1644	1695	1710	532	510	519	482
										1131	4916	4948	4989	4968	4811	4654	4826	5022	4718	4835	3475	3241	3248	3266	3339	301	280	249	255	264	3241	3335	3346	3424	3384	2869	3000	2895	2851	2881	1673	1611	1648	1699	1715	533	512	520	483
										1132	4934	4965	5006	4986	4827	4672	4845	5038	4733	4852	3487	3251	3259	3276	3351	302	281	250	255	265	3249	3349	3358	3435	3395	2878	3009	2904	2861	2890	1677	1616	1654	1705	1719	534	513	522	484
										1133	4952	4981	5027	5008	4846	4689	4864	5059	4750	4873	3498	3261	3270	3286	3361	302	282	251	255	266	3259	3358	3368	3446	3406	2886	3018	2911	2872	2900	1682	1621	1658	1709	1723	535	514	523	485
										1134	4970	5001	5047	5026	4864	4704	4879	5078	4769	4888	3512	3271	3283	3297	3373	303	282	251	256	265	3270	3370	3379	3459	3419	2893	3027	2920	2882	2909	1686	1625	1662	1713	1727	536	515	524	486
										1135	4988	5019	5065	5043	4880	4720	4897	5095	4786	4906	3523	3281	3295	3307	3385	303	283	251	257	266	3280	3381	3390	3472	3428	2902	3035	2928	2892	2916	1690	1630	1666	1718	1732	537	516	526	488
										1136	5006	5037	5083	5064	4896	4735	4914	5112	4803	4925	3537	3292	3307	3318	3395	304	284	252	258	266	3291	3393	3401	3481	3438	2910	3047	2938	2903	2926	1695	1634	1671	1723	1737	539	518	528	489
										1137	5028	5055	5101	5084	4914	4753	4932	5129	4821	4941	3549	3302	3319	3328	3406	304	284	252	258	267	3301	3403	3410	3495	3448	2918	3055	2947	2915	2935	1700	1637	1674	1728	1743	540	518	529	489
										1138	5047	5075	5118	5104	4931	4771	4948	5151	4837	4956	3560	3313	3330	3338	3417	304	286	253	259	267	3311	3411	3423	3506	3460	2930	3065	2954	2923	2943	1705	1642	1678	1732	1747	541	519	530	490
										1139	5067	5093	5139	5123	4951	4788	4965	5170	4857	4978	3574	3323	3342	3349	3428	305	287	253	259	268	3323	3425	3435	3517	3469	2940	3078	2963	2932	2952	1709	1646	1682	1737	1754	543	521	530	492
										1140	5086	5110	5159	5143	4969	4804	4985	5187	4875	4996	3587	3336	3353	3360	3440	305	287	254	260	268	3334	3435	3448	3529	3479	2949	3087	2973	2942	2960	1714	1650	1687	1742	1759	544	521	532	493
										1141	5107	5127	5178	5161	4986	4821	5001	5204	4897	5015	3598	3347	3364	3372	3453	305	287	254	261	269	3346	3447	3458	3543	3491	2959	3097	2982	2953	2971	1719	1655	1692	1747	1764	546	523	532	495
										1142	5126	5148	5197	5181	5004	4837	5022	5219	4914	5034	3612	3358	3376	3385	3465	306	287	256	261	269	3357	3458	3469	3553	3504	2967	3105	2992	2962	2979	1723	1660	1698	1753	1769	546	524	534	495
										1143	5146	5168	5217	5200	5022	4854	5041	5238	4930	5048	3626	3370	3390	3397	3475	307	288	256	261	270	3367	3468	3481	3564	3514	2978	3115	3001	2972	2988	1727	1665	1702	1758	1773	546	525	535	496
										1144	5168	5190	5233	5218	5041	4870	5057	5258	4949	5064	3636	3380	3402	3409	3486	307	288	256	262	270	3379	3480	3490	3574	3526	2989	3125	3010	2981	2997	1733	1670	1707	1762	1778	547	526	536	497
										1145	5187	5209	5254	5240	5061	4887	5073	5276	4967	5083	3648	3392	3416	3424	3497	309	288	256	262	271	3390	3488	3504	3587	3538	2999	3135	3021	2990	3006	1738	1674	1711	1767	1783	548	528	537	498
										1146	5206	5228	5273	5260	5081	4907	5091	5293	4985	5101	3661	3404	3427	3435	3510	310	289	257	262	271	3400	3498	3515	3600	3549	3009	3144	3033	3002	3018	1743	1680	1717	1772	1789	550	530	538	499
										1147	5225	5248	5293	5279	5099	4924	5109	5313	5004	5119	3672	3414	3439	3446	3523	311	289	257	263	272	3412	3511	3525	3612	3562	3021	3155	3044	3011	3028	1747	1684	1722	1778	1793	550	531	539	500
										1148	5245	5267	5314	5299	5120	4945	5125	5330	5022	5135	3683	3426	3449	3457	3534	312	289	257	263	272	3421	3525	3536	3622	3574	3031	3166	3054	3020	3035	1752	1690	1725	1782	1798	551	532	540	501
										1149	5266	5285	5335	5319	5139	4965	5142	5347	5038	5154	3693	3440	3460	3471	3546	312	289	258	264	273	3430	3536	3551	3634	3589	3040	3177	3064	3031	3045	1756	1693	1732	1786	1802	552	533	542	502
										1150	5286	5303	5356	5339	5156	4982	5163	5366	5057	5171	3705	3452	3472	3482	3558	313	290	259	265	273	3439	3547	3563	3645	3598	3051	3189	3075	3040	3054	1762	1699	1737	1791	1807	553	535	543	503
										1151	5306	5323	5377	5355	5176	5000	5179	5385	5075	5189	3720	3464	3484	3494	3569	315	290	259	266	274	3451	3558	3575	3656	3611	3060	3198	3084	3051	3065	1765	1705	1743	1796	1810	554	536	544	504
										1152	5325	5343	5398	5372	5198	5020	5200	5406	5097	5207	3731	3476	3498	3509	3581	316	290	260	266	275	3463	3569	3586	3667	3624	3069	3208	3096	3060	3075	1772	1709	1749	1802	1815	555	538	546	505
										1153	5345	5361	5416	5392	5219	5039	5219	5424	5115	5226	3745	3489	3508	3521	3592	316	291	260	266	276	3477	3580	3597	3681	3635	3079	3219	3106	3070	3086	1776	1714	1754	1806	1820	558	539	548	506
										1154	5364	5379	5437	5412	5239	5057	5238	5442	5133	5244	3758	3502	3522	3532	3603	318	292	261	267	277	3489	3593	3608	3693	3646	3088	3231	3115	3078	3095	1781	1718	1756	1812	1825	560	541	550	507
										1155	5385	5399	5458	5434	5258	5077	5258	5461	5154	5262	3773	3513	3535	3545	3615	318	293	261	267	278	3498	3604	3619	3705	3658	3099	3243	3125	3086	3104	1786	1723	1760	1817	1830	562	541	551	508
										1156	5404	5421	5478	5455	5278	5093	5275	5479	5172	5281	3785	3524	3546	3558	3627	319	293	262	268	279	3510	3617	3631	3715	3669	3110	3257	3136	3096	3114	1790	1726	1765	1822	1836	563	543	553	509
										1157	5425	5444	5500	5477	5296	5111	5295	5497	5190	5301	3796	3536	3561	3570	3642	319	294	263	268	279	3522	3629	3643	3725	3679	3121	3265	3148	3105	3124	1795	1730	1771	1827	1841	564	545	554	510
										1158	5447	5464	5519	5499	5315	5129	5315	5517	5209	5318	3808	3548	3574	3581	3655	320	294	263	269	279	3534	3639	3655	3736	3693	3132	3275	3158	3114	3132	1799	1735	1775	1833	1846	566	545	556	510
										1159	5467	5483	5541	5519	5333	5147	5335	5537	5226	5338	3819	3559	3586	3595	3666	320	295	263	269	280	3547	3652	3665	3747	3706	3141	3286	3169	3124	3142	1804	1739	1779	1837	1853	567	546	557	512
										1160	5488	5498	5560	5540	5351	5163	5353	5557	5246	5356	3834	3570	3597	3607	3679	321	295	263	270	280	3557	3665	3676	3760	3718	3151	3297	3180	3132	3152	1810	1744	1785	1842	1858	568	547	558	513
										1161	5510	5518	5582	5565	5371	5182	5375	5576	5267	5374	3847	3582	3610	3619	3692	322	296	263	270	281	3568	3676	3690	3770	3730	3161	3309	3191	3141	3162	1817	1750	1791	1845	1864	570	549	560	514
										1162	5528	5538	5604	5585	5390	5201	5395	5595	5284	5393	3860	3594	3624	3633	3705	323	297	263	271	281	3579	3686	3702	3784	3742	3171	3319	3200	3150	3173	1824	1755	1796	1851	1870	572	551	561	515
										1163	5547	5559	5625	5607	5410	5221	5413	5613	5303	5409	3873	3606	3635	3646	3718	323	297	264	272	281	3592	3697	3715	3798	3753	3182	3330	3210	3160	3183	1830	1762	1802	1856	1874	573	552	563	517
										1164	5565	5578	5647	5625	5429	5240	5435	5635	5324	5431	3885	3616	3645	3658	3731	324	298	264	272	282	3603	3710	3729	3810	3765	3193	3340	3220	3171	3194	1835	1768	1805	1860	1881	575	553	564	518
										1165	5587	5598	5666	5646	5449	5255	5456	5655	5345	5449	3899	3626	3656	3671	3744	325	298	265	273	282	3614	3723	3741	3824	3779	3203	3350	3230	3181	3204	1838	1773	1812	1865	1886	576	554	565	520
										1166	5605	5616	5689	5666	5467	5275	5477	5676	5365	5470	3911	3637	3667	3684	3758	326	299	265	274	283	3624	3736	3752	3836	3793	3214	3361	3242	3192	3215	1844	1778	1816	1869	1892	578	555	567	522
										1167	5628	5637	5712	5686	5488	5293	5495	5699	5385	5490	3926	3649	3682	3699	3770	326	299	266	274	283	3636	3749	3763	3848	3807	3225	3373	3253	3202	3225	1849	1783	1821	1876	1898	579	556	569	522
										1168	5649	5657	5733	5706	5507	5314	5519	5722	5405	5510	3939	3661	3693	3711	3784	327	300	267	274	284	3649	3762	3777	3862	3819	3234	3383	3262	3213	3234	1856	1787	1825	1883	1904	581	557	572	523
										1169	5668	5678	5756	5726	5527	5333	5540	5744	5427	5529	3954	3675	3705	3723	3797	327	300	267	275	284	3662	3776	3790	3872	3833	3243	3394	3271	3225	3243	1863	1792	1830	1890	1908	582	559	573	524
										1170	5688	5701	5780	5746	5547	5353	5560	5761	5446	5549	3966	3689	3719	3734	3810	328	301	267	275	284	3674	3787	3802	3885	3847	3252	3406	3282	3236	3255	1867	1797	1836	1893	1912	583	560	575	525
										1171	5711	5722	5799	5767	5569	5373	5580	5780	5467	5569	3979	3700	3730	3748	3824	328	301	267	276	285	3687	3800	3817	3901	3860	3263	3417	3290	3247	3265	1873	1802	1842	1898	1917	585	562	577	525
										1172	5731	5743	5819	5791	5593	5391	5600	5802	5489	5591	3993	3713	3742	3763	3836	328	302	267	277	286	3700	3814	3831	3914	3873	3273	3429	3302	3257	3276	1878	1807	1847	1903	1922	586	564	579	526
										1173	5753	5765	5843	5812	5612	5409	5620	5825	5510	5610	4008	3727	3755	3776	3848	329	304	268	277	287	3713	3826	3845	3926	3888	3282	3437	3315	3269	3288	1882	1810	1854	1908	1927	587	564	581	528
										1174	5773	5786	5863	5834	5632	5429	5640	5846	5530	5631	4021	3739	3769	3791	3863	330	305	268	278	287	3725	3836	3859	3937	3902	3293	3448	3325	3278	3299	1888	1816	1859	1914	1932	589	566	582	529
										1175	5796	5807	5887	5857	5653	5450	5663	5869	5551	5651	4036	3751	3783	3803	3875	330	305	268	279	288	3737	3852	3871	3949	3915	3303	3459	3335	3288	3309	1893	1821	1865	1919	1937	590	568	583	531
										1176	5820	5833	5910	5878	5672	5470	5680	5890	5572	5673	4050	3764	3794	3814	3886	330	306	268	279	288	3750	3864	3886	3963	3929	3314	3471	3344	3298	3322	1899	1827	1872	1923	1942	591	569	584	531
										1177	5840	5852	5931	5900	5695	5492	5698	5912	5593	5695	4067	3776	3807	3826	3901	331	306	269	280	289	3762	3877	3900	3976	3940	3325	3482	3354	3309	3333	1905	1832	1878	1928	1948	591	571	586	533
										1178	5863	5874	5952	5923	5717	5513	5719	5934	5614	5714	4079	3789	3819	3837	3913	331	307	269	280	290	3776	3891	3915	3990	3953	3332	3496	3366	3318	3342	1909	1836	1880	1933	1954	593	573	587	535
										1179	5885	5898	5972	5945	5738	5533	5741	5957	5634	5736	4090	3802	3830	3853	3926	332	308	270	280	290	3789	3904	3926	4004	3965	3342	3507	3376	3328	3351	1914	1841	1885	1939	1960	594	574	589	536
										1180	5904	5920	5998	5969	5758	5555	5762	5979	5656	5756	4102	3815	3841	3867	3939	332	308	270	281	291	3801	3917	3940	4017	3977	3352	3518	3387	3337	3361	1919	1846	1889	1943	1967	596	575	591	537
										1181	5925	5941	6020	5992	5780	5575	5782	6002	5676	5776	4116	3827	3854	3880	3955	333	309	270	281	291	3814	3929	3950	4031	3989	3360	3531	3398	3347	3374	1923	1853	1893	1947	1973	598	576	592	539
										1182	5948	5961	6039	6016	5803	5595	5803	6027	5697	5794	4129	3841	3865	3894	3970	334	309	271	283	292	3828	3942	3960	4044	4006	3372	3541	3408	3359	3385	1929	1859	1898	1953	1980	599	577	594	541
										1183	5970	5982	6062	6039	5825	5615	5824	6050	5716	5816	4143	3856	3879	3910	3984	335	309	272	284	293	3840	3954	3970	4059	4019	3381	3555	3421	3369	3396	1934	1865	1903	1958	1984	601	579	595	541
										1184	5992	6002	6085	6062	5845	5636	5843	6073	5736	5837	4154	3867	3894	3923	3997	336	310	272	284	293	3854	3966	3983	4073	4030	3394	3567	3432	3381	3407	1940	1871	1906	1965	1989	603	579	596	543
										1185	6012	6024	6107	6082	5866	5657	5865	6097	5754	5858	4166	3881	3908	3936	4008	336	311	273	285	294	3867	3980	3998	4087	4043	3403	3580	3441	3391	3418	1945	1876	1910	1972	1995	604	581	598	544
										1186	6033	6046	6131	6106	5887	5675	5888	6121	5776	5880	4182	3894	3919	3950	4024	337	312	273	285	295	3881	3992	4012	4102	4056	3416	3592	3452	3401	3431	1950	1882	1916	1977	2001	605	583	599	545
										1187	6055	6068	6152	6133	5908	5696	5909	6143	5798	5901	4200	3908	3932	3963	4038	338	313	274	286	295	3894	4004	4023	4115	4071	3428	3603	3462	3411	3442	1955	1888	1922	1982	2005	606	585	601	547
										1188	6078	6093	6176	6156	5930	5717	5930	6167	5817	5924	4215	3920	3943	3976	4054	339	314	274	287	296	3905	4018	4038	4129	4085	3441	3615	3476	3424	3452	1961	1892	1927	1988	2013	608	586	603	549
										1189	6101	6114	6195	6180	5953	5738	5950	6190	5838	5946	4230	3935	3958	3989	4069	340	314	275	287	296	3919	4031	4052	4142	4097	3451	3628	3487	3438	3465	1967	1897	1933	1995	2019	610	587	604	551
										1190	6123	6136	6219	6201	5977	5756	5970	6213	5859	5969	4244	3948	3970	3999	4079	341	315	275	288	296	3933	4043	4066	4155	4112	3461	3638	3497	3448	3476	1973	1905	1938	1999	2026	611	588	605	552
										1191	6144	6160	6241	6226	6001	5779	5991	6234	5883	5993	4259	3962	3984	4013	4095	342	316	275	288	297	3946	4057	4079	4169	4124	3470	3650	3508	3460	3488	1979	1910	1943	2004	2032	612	590	606	553
										1192	6165	6183	6263	6249	6020	5798	6011	6257	5901	6014	4275	3975	3997	4027	4109	343	316	276	289	297	3959	4070	4092	4182	4136	3483	3661	3518	3471	3500	1984	1915	1950	2009	2037	614	591	608	554
										1193	6186	6207	6284	6274	6041	5819	6034	6280	5922	6038	4288	3987	4007	4040	4124	344	317	277	289	297	3970	4084	4106	4193	4149	3495	3672	3531	3482	3508	1990	1919	1956	2015	2042	616	593	609	556
										1194	6209	6228	6309	6295	6064	5841	6055	6301	5945	6061	4304	4002	4023	4053	4137	345	317	277	289	298	3983	4097	4121	4207	4161	3507	3685	3542	3492	3517	1996	1925	1962	2020	2048	617	595	611	558
										1195	6236	6251	6330	6317	6087	5862	6075	6325	5967	6081	4321	4015	4037	4067	4152	345	318	278	290	299	3996	4109	4134	4220	4174	3519	3697	3555	3502	3529	2001	1930	1968	2028	2053	620	595	612	560
										1196	6258	6276	6354	6337	6112	5885	6097	6346	5989	6104	4335	4031	4049	4080	4167	347	318	278	291	299	4011	4123	4147	4236	4188	3530	3709	3567	3514	3540	2006	1936	1974	2033	2060	621	597	613	561
										1197	6283	6299	6377	6361	6131	5908	6122	6369	6011	6126	4349	4043	4063	4094	4181	347	320	278	291	300	4024	4136	4161	4249	4202	3540	3721	3579	3525	3551	2011	1941	1980	2038	2064	623	599	615	562
										1198	6305	6321	6400	6388	6154	5930	6146	6393	6033	6149	4363	4058	4078	4108	4195	347	321	279	292	300	4037	4150	4175	4264	4216	3555	3734	3588	3536	3561	2016	1948	1985	2045	2070	625	600	618	564
										1199	6327	6343	6423	6414	6176	5953	6166	6415	6053	6172	4379	4070	4093	4120	4208	347	321	279	292	301	4051	4164	4190	4276	4230	3566	3745	3600	3548	3573	2020	1954	1991	2049	2076	627	602	620	565
										1200	6351	6368	6446	6435	6197	5977	6188	6435	6076	6195	4393	4085	4106	4132	4225	348	321	280	293	301	4063	4177	4202	4290	4246	3578	3759	3612	3560	3583	2026	1958	1996	2054	2083	629	603	622	566
										1201	6376	6391	6470	6460	6220	5997	6211	6455	6098	6219	4406	4099	4119	4144	4239	349	322	280	293	302	4073	4191	4216	4305	4260	3589	3769	3627	3572	3596	2032	1965	2001	2060	2088	631	605	624	567
										1202	6399	6414	6493	6482	6245	6021	6235	6478	6119	6243	4420	4112	4134	4159	4253	350	322	281	294	302	4088	4207	4228	4317	4275	3598	3780	3640	3583	3608	2038	1971	2006	2067	2095	632	607	626	568
										1203	6421	6438	6518	6505	6271	6044	6263	6503	6140	6267	4436	4127	4148	4172	4269	350	323	281	294	302	4102	4221	4242	4331	4290	3608	3792	3653	3592	3621	2043	1976	2011	2072	2102	634	607	627	570
										1204	6441	6460	6543	6529	6296	6069	6286	6526	6160	6293	4454	4143	4162	4186	4284	351	323	282	294	303	4113	4238	4255	4344	4303	3620	3806	3665	3603	3635	2050	1983	2017	2079	2108	635	608	629	571
										1205	6463	6484	6566	6555	6317	6090	6307	6551	6179	6317	4470	4157	4177	4201	4298	351	324	282	295	304	4126	4252	4268	4355	4317	3632	3819	3677	3613	3646	2056	1989	2021	2086	2115	636	609	630	572
										1206	6485	6505	6593	6579	6340	6112	6331	6574	6202	6339	4487	4170	4188	4217	4314	352	324	283	295	304	4138	4268	4282	4371	4331	3643	3831	3687	3624	3658	2063	1994	2026	2092	2120	637	612	631	574
										1207	6510	6530	6618	6602	6366	6136	6354	6599	6224	6360	4503	4184	4201	4233	4327	353	324	283	296	305	4152	4283	4294	4388	4344	3655	3844	3698	3636	3669	2070	2001	2032	2097	2127	638	613	633	576
										1208	6534	6555	6643	6625	6390	6157	6378	6624	6247	6384	4519	4197	4215	4244	4342	354	326	284	297	306	4164	4295	4310	4400	4359	3667	3858	3710	3648	3683	2075	2006	2039	2101	2134	640	614	635	577
										1209	6561	6579	6668	6651	6413	6180	6401	6646	6269	6409	4533	4213	4227	4260	4356	355	326	284	297	306	4180	4306	4325	4413	4373	3680	3872	3721	3659	3695	2083	2013	2045	2107	2140	641	616	637	578
										1210	6586	6599	6691	6674	6439	6201	6425	6671	6291	6433	4548	4229	4241	4273	4370	356	327	284	298	306	4194	4319	4340	4426	4387	3691	3887	3737	3669	3707	2089	2017	2051	2113	2146	643	617	638	579
										1211	6609	6622	6719	6698	6464	6223	6445	6697	6312	6456	4566	4245	4256	4286	4387	356	328	285	298	306	4209	4334	4357	4440	4403	3702	3900	3748	3679	3719	2094	2023	2058	2120	2152	644	620	639	581
										1212	6631	6646	6744	6721	6490	6246	6470	6723	6333	6478	4581	4260	4271	4301	4401	357	328	285	299	307	4224	4349	4372	4455	4419	3714	3914	3760	3689	3731	2100	2029	2063	2125	2157	647	621	641	582
										1213	6657	6671	6771	6745	6515	6268	6493	6748	6358	6502	4596	4274	4285	4316	4417	358	329	286	299	307	4235	4365	4385	4470	4433	3726	3927	3772	3702	3742	2107	2034	2070	2131	2162	648	622	642	584
										1214	6682	6699	6799	6771	6541	6290	6516	6773	6381	6525	4613	4290	4298	4332	4434	358	330	287	300	308	4251	4378	4399	4484	4449	3738	3940	3786	3712	3754	2114	2041	2076	2137	2168	650	624	644	586
										1215	6708	6724	6823	6798	6565	6313	6540	6799	6405	6549	4629	4306	4313	4348	4450	360	331	287	300	309	4265	4392	4414	4495	4463	3748	3954	3798	3724	3765	2119	2047	2082	2143	2175	651	625	646	587
										1216	6732	6749	6849	6821	6590	6335	6562	6821	6428	6573	4645	4319	4328	4363	4466	361	331	288	301	309	4279	4408	4428	4509	4478	3758	3966	3810	3734	3777	2126	2051	2089	2148	2181	652	627	648	589
										1217	6758	6774	6873	6848	6613	6356	6585	6844	6454	6597	4662	4335	4341	4379	4481	361	332	289	302	310	4290	4421	4443	4521	4494	3770	3979	3821	3746	3789	2132	2056	2094	2153	2186	655	628	650	591
										1218	6783	6799	6900	6873	6636	6377	6608	6870	6477	6620	4678	4350	4355	4391	4496	362	332	289	303	311	4306	4436	4456	4536	4508	3783	3988	3835	3755	3802	2137	2061	2099	2159	2192	657	629	651	592
										1219	6810	6825	6925	6897	6660	6398	6632	6896	6500	6645	4694	4364	4369	4406	4512	362	333	290	304	312	4317	4449	4473	4553	4522	3795	4005	3845	3766	3813	2143	2067	2105	2165	2199	659	631	652	594
										1220	6835	6850	6949	6921	6687	6420	6654	6922	6527	6668	4711	4377	4384	4423	4528	362	333	291	305	312	4331	4463	4485	4572	4538	3807	4019	3857	3779	3823	2149	2071	2110	2171	2205	661	632	654	596
										1221	6860	6877	6974	6947	6710	6444	6677	6949	6550	6689	4725	4392	4398	4439	4540	363	334	291	305	313	4343	4475	4501	4588	4553	3820	4032	3869	3790	3837	2156	2078	2116	2178	2211	662	633	656	597
										1222	6889	6903	7000	6972	6736	6466	6700	6975	6571	6714	4742	4407	4411	4453	4555	364	334	291	306	313	4357	4488	4516	4603	4568	3832	4044	3881	3802	3849	2161	2085	2123	2185	2219	664	634	658	598
										1223	6916	6933	7026	6997	6761	6489	6721	7001	6593	6736	4758	4422	4426	4468	4570	364	335	292	307	314	4372	4503	4533	4620	4585	3845	4056	3893	3815	3862	2168	2090	2128	2191	2226	665	637	659	600
										1224	6942	6960	7053	7024	6786	6514	6744	7028	6616	6760	4774	4437	4440	4484	4583	365	336	293	308	315	4386	4518	4550	4636	4601	3855	4069	3906	3826	3873	2175	2096	2133	2196	2233	667	638	660	602
										1225	6968	6986	7077	7049	6812	6538	6769	7052	6638	6785	4789	4452	4455	4498	4598	366	337	293	309	316	4402	4534	4562	4650	4616	3868	4082	3917	3840	3885	2181	2101	2140	2202	2239	668	639	662	603
										1226	6993	7012	7104	7075	6841	6562	6794	7078	6660	6810	4805	4465	4470	4514	4613	366	338	294	309	316	4416	4548	4577	4663	4632	3879	4094	3930	3849	3897	2187	2106	2146	2210	2246	670	641	663	603
										1227	7018	7037	7130	7101	6867	6587	6816	7103	6685	6833	4821	4480	4485	4527	4630	367	338	294	309	317	4427	4565	4591	4680	4647	3892	4107	3942	3861	3907	2194	2111	2152	2216	2253	672	643	664	605
										1228	7047	7061	7156	7128	6889	6607	6839	7132	6709	6857	4836	4494	4501	4542	4646	368	339	295	310	319	4444	4578	4606	4696	4665	3902	4120	3954	3876	3920	2201	2118	2158	2221	2259	673	644	665	607
										1229	7071	7089	7182	7156	6911	6629	6864	7159	6734	6883	4854	4509	4517	4560	4662	369	340	296	310	319	4458	4594	4620	4710	4682	3913	4133	3966	3887	3933	2208	2125	2163	2227	2266	674	645	666	609
										1230	7096	7113	7208	7182	6940	6651	6890	7186	6759	6908	4870	4524	4533	4574	4673	370	340	297	312	319	4474	4608	4633	4727	4701	3926	4144	3977	3900	3945	2214	2130	2170	2232	2273	675	648	667	611
										1231	7121	7138	7237	7207	6963	6673	6915	7211	6784	6934	4887	4540	4551	4587	4689	371	341	297	313	320	4489	4624	4647	4742	4719	3937	4155	3991	3913	3959	2220	2136	2177	2238	2279	677	649	670	614
										1232	7150	7165	7265	7232	6990	6696	6943	7236	6807	6958	4902	4555	4565	4604	4705	372	342	298	314	321	4501	4637	4662	4757	4735	3951	4168	4006	3926	3972	2226	2142	2184	2244	2286	679	651	673	616
										1233	7175	7189	7291	7260	7014	6720	6967	7263	6833	6984	4919	4570	4582	4620	4720	373	343	298	315	321	4516	4653	4676	4774	4750	3964	4183	4022	3940	3983	2233	2148	2189	2252	2292	681	652	674	617
										1234	7202	7217	7318	7288	7043	6745	6995	7291	6856	7010	4935	4588	4597	4635	4735	373	343	299	315	322	4532	4672	4691	4790	4768	3977	4196	4033	3952	3999	2238	2155	2196	2257	2299	683	653	677	618
										1235	7229	7246	7344	7318	7070	6767	7025	7317	6880	7034	4953	4604	4613	4651	4752	374	344	300	316	324	4547	4690	4704	4807	4785	3993	4207	4046	3964	4010	2246	2162	2203	2264	2308	684	655	678	619
										1236	7256	7275	7373	7345	7095	6791	7051	7341	6905	7059	4971	4619	4629	4669	4768	374	345	300	316	324	4563	4705	4719	4824	4797	4005	4221	4058	3976	4023	2252	2168	2209	2270	2316	685	657	680	620
										1237	7282	7301	7398	7373	7125	6814	7076	7369	6927	7083	4990	4634	4648	4687	4783	375	345	301	316	325	4577	4723	4735	4840	4813	4018	4235	4072	3990	4034	2259	2174	2215	2277	2323	686	659	682	622
										1238	7309	7331	7424	7401	7153	6840	7102	7397	6954	7107	5007	4649	4664	4703	4801	375	346	302	316	326	4593	4737	4750	4857	4830	4030	4248	4083	4003	4048	2265	2178	2222	2283	2330	687	660	683	624
										1239	7336	7359	7452	7429	7179	6866	7129	7423	6977	7131	5025	4665	4679	4719	4817	377	346	302	317	326	4612	4754	4763	4873	4845	4042	4260	4100	4015	4062	2272	2183	2230	2288	2337	689	662	684	625
										1240	7364	7383	7480	7457	7207	6892	7156	7450	7004	7156	5043	4681	4693	4736	4833	377	347	303	317	327	4624	4769	4776	4888	4861	4052	4273	4114	4030	4076	2278	2190	2237	2294	2345	690	663	685	627
										1241	7388	7409	7510	7482	7233	6919	7182	7477	7029	7182	5060	4699	4708	4751	4850	378	347	303	318	327	4640	4783	4791	4905	4877	4066	4287	4127	4042	4088	2283	2196	2245	2301	2351	692	666	686	628
										1242	7417	7438	7538	7511	7260	6944	7207	7505	7053	7206	5079	4718	4724	4766	4867	379	347	304	319	328	4656	4799	4810	4921	4893	4082	4302	4141	4055	4101	2289	2202	2252	2307	2356	694	668	689	630
										1243	7446	7467	7566	7539	7286	6967	7234	7531	7078	7232	5097	4735	4738	4785	4883	381	348	305	320	329	4670	4816	4829	4938	4911	4097	4314	4152	4069	4116	2295	2209	2258	2313	2363	696	670	690	632
										1244	7476	7493	7596	7567	7313	6991	7261	7561	7103	7258	5113	4748	4754	4804	4900	381	349	305	321	330	4686	4831	4846	4956	4927	4109	4326	4167	4083	4129	2302	2214	2263	2319	2369	698	671	692	633
										1245	7499	7521	7624	7596	7341	7016	7287	7587	7127	7283	5131	4765	4770	4820	4916	381	350	305	321	331	4701	4845	4863	4972	4943	4122	4338	4180	4097	4144	2309	2221	2269	2326	2375	700	673	693	635
										1246	7524	7548	7650	7622	7369	7041	7311	7617	7153	7306	5148	4780	4785	4839	4934	382	351	306	322	331	4716	4861	4880	4989	4961	4136	4353	4195	4109	4157	2315	2227	2276	2332	2380	703	674	695	636
										1247	7552	7573	7674	7649	7394	7066	7338	7644	7178	7333	5167	4794	4803	4855	4951	382	352	306	322	333	4733	4876	4893	5004	4977	4146	4368	4206	4123	4175	2320	2234	2282	2340	2386	704	676	697	638
										1248	7578	7604	7702	7679	7423	7092	7363	7673	7205	7357	5184	4812	4817	4876	4967	382	353	307	323	333	4749	4891	4908	5020	4990	4158	4381	4220	4137	4188	2327	2240	2289	2348	2393	706	677	698	639
										1249	7604	7633	7732	7706	7451	7115	7390	7699	7228	7385	5201	4826	4836	4892	4984	383	354	308	323	334	4766	4905	4923	5035	5008	4171	4395	4235	4148	4201	2333	2246	2295	2354	2400	707	679	699	641
										1250	7631	7660	7762	7739	7481	7137	7419	7728	7255	7409	5219	4843	4851	4907	5000	384	355	308	324	335	4782	4919	4938	5051	5024	4185	4408	4249	4161	4214	2341	2252	2303	2362	2409	710	680	701	642
										1251	7660	7689	7793	7768	7509	7160	7446	7755	7284	7435	5237	4859	4868	4922	5016	384	356	308	325	336	4796	4933	4954	5067	5040	4198	4423	4264	4175	4230	2347	2259	2310	2367	2416	712	682	703	643
										1252	7690	7723	7823	7798	7536	7185	7472	7781	7313	7461	5255	4874	4884	4941	5034	385	356	309	325	336	4815	4952	4969	5083	5057	4214	4437	4276	4190	4245	2353	2265	2314	2372	2423	714	684	704	644
										1253	7716	7754	7852	7825	7563	7212	7499	7810	7338	7489	5273	4892	4903	4958	5051	386	358	310	326	336	4833	4968	4984	5099	5073	4229	4454	4290	4204	4261	2360	2272	2319	2379	2430	715	687	707	646
										1254	7745	7782	7883	7850	7593	7240	7526	7839	7362	7515	5288	4907	4918	4976	5067	386	358	311	327	338	4852	4984	5001	5115	5089	4243	4467	4306	4217	4273	2366	2279	2326	2387	2436	717	688	708	646
										1255	7770	7811	7911	7878	7621	7265	7551	7870	7389	7543	5309	4926	4934	4992	5084	387	359	311	327	338	4868	5003	5016	5132	5105	4257	4480	4320	4229	4288	2372	2286	2333	2395	2442	719	690	709	648
										1256	7801	7841	7940	7907	7652	7292	7578	7897	7417	7572	5328	4941	4949	5011	5104	388	359	312	327	339	4886	5020	5036	5150	5119	4272	4494	4334	4244	4303	2378	2292	2339	2402	2449	720	692	712	649
										1257	7832	7869	7970	7936	7680	7318	7606	7924	7444	7598	5343	4957	4965	5028	5121	389	359	312	328	339	4901	5036	5052	5168	5137	4286	4509	4347	4259	4317	2384	2299	2344	2408	2454	722	694	713	651
										1258	7864	7897	7998	7967	7708	7343	7636	7955	7470	7626	5362	4975	4982	5043	5141	390	361	313	329	340	4915	5054	5068	5185	5155	4300	4523	4362	4271	4330	2394	2305	2351	2415	2461	723	696	714	652
										1259	7892	7929	8028	8000	7734	7367	7665	7981	7497	7654	5380	4993	5000	5060	5158	391	361	314	330	340	4931	5068	5083	5203	5173	4312	4538	4377	4285	4345	2401	2311	2357	2425	2469	725	698	715	654
										1260	7921	7959	8060	8028	7763	7393	7690	8009	7522	7681	5399	5009	5018	5078	5175	391	363	314	330	341	4952	5083	5096	5221	5191	4325	4554	4390	4300	4359	2406	2316	2364	2433	2475	726	699	718	655
										1261	7949	7987	8090	8057	7791	7421	7717	8037	7549	7711	5418	5028	5034	5096	5193	392	364	315	332	341	4968	5101	5112	5239	5208	4339	4566	4404	4313	4372	2413	2321	2370	2440	2483	728	701	720	657
										1262	7979	8017	8122	8086	7818	7445	7742	8065	7572	7739	5436	5044	5050	5113	5209	394	364	317	332	342	4985	5118	5128	5256	5223	4353	4578	4420	4325	4386	2421	2328	2376	2447	2490	728	703	722	658
										1263	8007	8045	8151	8118	7846	7473	7768	8097	7599	7765	5457	5062	5067	5132	5224	394	365	318	333	343	5003	5133	5145	5274	5239	4365	4595	4436	4340	4399	2428	2333	2382	2452	2496	731	705	724	659
										1264	8038	8078	8182	8146	7879	7499	7795	8126	7624	7792	5475	5079	5082	5150	5245	395	366	319	333	344	5018	5151	5161	5293	5258	4378	4608	4450	4354	4411	2435	2340	2389	2459	2504	733	706	726	661
										1265	8071	8104	8210	8177	7907	7526	7823	8156	7648	7821	5496	5098	5101	5166	5262	396	368	319	334	344	5035	5169	5179	5308	5275	4393	4624	4464	4368	4425	2441	2347	2395	2465	2509	735	708	727	663
										1266	8100	8133	8243	8203	7937	7551	7850	8185	7678	7851	5518	5117	5118	5184	5282	397	368	320	335	345	5052	5186	5197	5328	5294	4406	4641	4478	4381	4440	2450	2353	2403	2471	2515	736	709	730	665
										1267	8132	8165	8274	8235	7964	7578	7876	8217	7703	7876	5535	5133	5135	5199	5300	398	369	320	337	346	5068	5203	5215	5347	5311	4421	4657	4492	4394	4455	2456	2360	2411	2479	2520	738	710	732	667
										1268	8164	8197	8307	8264	7996	7606	7903	8244	7732	7904	5552	5152	5151	5216	5320	398	370	322	338	346	5082	5220	5231	5363	5328	4434	4673	4508	4410	4470	2462	2365	2418	2485	2527	740	713	733	668
										1269	8198	8227	8336	8295	8026	7632	7932	8272	7760	7931	5570	5167	5167	5232	5338	400	371	323	338	348	5100	5238	5249	5382	5345	4451	4688	4525	4422	4485	2468	2372	2425	2494	2537	742	715	735	670
										1270	8232	8255	8368	8327	8058	7659	7961	8303	7788	7958	5587	5185	5187	5251	5356	401	371	323	339	348	5117	5255	5265	5400	5362	4464	4704	4541	4437	4497	2476	2378	2431	2500	2544	744	717	738	672
										1271	8264	8286	8399	8355	8093	7688	7989	8333	7815	7988	5606	5205	5204	5265	5374	401	371	323	340	349	5136	5274	5283	5418	5381	4478	4719	4557	4454	4510	2484	2384	2437	2508	2551	745	719	739	673
										1272	8294	8317	8431	8387	8122	7716	8016	8364	7847	8017	5624	5221	5221	5283	5391	403	372	323	340	350	5152	5291	5301	5438	5400	4496	4734	4575	4468	4523	2490	2391	2443	2514	2560	747	721	740	675
										1273	8326	8349	8464	8419	8153	7744	8042	8398	7875	8047	5643	5236	5241	5301	5410	404	373	324	340	350	5169	5306	5320	5457	5412	4509	4749	4587	4482	4536	2495	2398	2450	2521	2566	749	722	742	677
										1274	8355	8378	8497	8450	8184	7769	8070	8427	7903	8077	5661	5256	5257	5321	5426	405	373	326	341	350	5184	5324	5336	5477	5427	4523	4763	4603	4500	4552	2504	2406	2458	2529	2573	752	724	743	678
										1275	8386	8413	8531	8484	8216	7801	8095	8457	7932	8105	5680	5275	5275	5337	5446	406	374	327	342	351	5200	5343	5353	5494	5441	4535	4780	4615	4515	4567	2512	2414	2464	2536	2579	754	725	745	679
										1276	8417	8445	8560	8516	8247	7830	8124	8486	7961	8135	5699	5295	5294	5355	5467	407	375	327	343	352	5220	5360	5370	5511	5456	4551	4796	4630	4531	4582	2519	2422	2471	2543	2587	756	727	748	681
										1277	8446	8478	8597	8549	8278	7859	8150	8518	7990	8164	5718	5313	5312	5373	5486	408	376	328	343	353	5236	5379	5388	5533	5472	4568	4814	4647	4544	4595	2524	2427	2478	2551	2594	758	729	749	683
										1278	8475	8508	8629	8583	8309	7890	8177	8550	8018	8194	5738	5331	5333	5391	5504	409	377	329	344	353	5252	5398	5406	5554	5491	4581	4830	4660	4562	4610	2532	2434	2485	2557	2601	759	732	751	685
										1279	8507	8539	8662	8617	8336	7923	8206	8580	8042	8226	5757	5349	5350	5409	5523	410	378	331	344	354	5270	5415	5426	5575	5506	4596	4846	4674	4576	4623	2540	2441	2491	2565	2609	760	734	754	687
										1280	8538	8572	8696	8647	8365	7953	8235	8613	8070	8256	5778	5365	5368	5427	5541	411	379	332	345	354	5288	5431	5444	5592	5525	4610	4863	4691	4592	4636	2546	2448	2499	2573	2616	762	736	755	690
										1281	8572	8608	8731	8675	8395	7980	8262	8644	8100	8285	5796	5383	5383	5445	5561	412	380	333	346	355	5309	5448	5462	5610	5542	4624	4879	4707	4609	4651	2553	2454	2506	2580	2624	764	739	756	692
										1282	8603	8640	8762	8706	8427	8010	8291	8673	8128	8317	5817	5399	5401	5465	5580	414	381	334	346	356	5326	5467	5481	5628	5560	4639	4897	4721	4627	4665	2560	2462	2515	2588	2633	766	740	758	693
										1283	8634	8672	8795	8739	8460	8041	8319	8701	8161	8348	5835	5417	5421	5484	5598	414	381	335	347	357	5342	5483	5499	5646	5581	4653	4914	4734	4645	4683	2568	2468	2523	2596	2642	767	742	761	695
										1284	8668	8703	8825	8770	8491	8069	8348	8733	8187	8379	5856	5436	5442	5503	5618	415	383	336	347	357	5356	5501	5518	5664	5597	4668	4929	4750	4661	4700	2574	2476	2529	2604	2649	769	745	762	697
										1285	8702	8740	8861	8800	8525	8097	8377	8761	8214	8410	5874	5453	5461	5519	5636	415	383	337	347	358	5376	5520	5538	5684	5615	4683	4946	4763	4676	4716	2582	2483	2535	2609	2658	771	747	764	699
										1286	8735	8777	8897	8831	8554	8127	8406	8794	8241	8438	5893	5471	5479	5539	5655	415	383	337	348	359	5393	5536	5556	5700	5634	4701	4964	4778	4696	4732	2588	2489	2540	2616	2665	773	747	766	701
										1287	8767	8812	8929	8864	8586	8157	8439	8823	8269	8475	5914	5492	5499	5558	5673	417	384	337	349	360	5410	5554	5575	5721	5652	4719	4983	4794	4714	4748	2595	2496	2547	2623	2672	775	749	768	703
										1288	8801	8845	8959	8896	8616	8188	8467	8850	8300	8506	5933	5512	5517	5577	5692	418	385	338	349	361	5428	5572	5594	5740	5671	4737	4997	4810	4730	4765	2601	2503	2554	2631	2677	778	751	770	704
										1289	8836	8876	8991	8929	8649	8215	8497	8885	8332	8540	5953	5530	5534	5597	5711	419	386	339	350	362	5444	5590	5614	5762	5685	4752	5011	4825	4747	4780	2609	2509	2559	2638	2684	779	752	773	705
										1290	8868	8913	9025	8960	8678	8243	8527	8917	8364	8567	5972	5547	5553	5616	5732	420	387	339	350	362	5463	5611	5635	5781	5706	4767	5026	4840	4761	4798	2616	2516	2567	2645	2692	781	753	774	708
										1291	8898	8949	9061	8993	8708	8275	8560	8945	8396	8596	5995	5570	5573	5633	5754	421	387	341	351	363	5480	5631	5652	5801	5723	4784	5040	4859	4777	4813	2623	2523	2573	2653	2699	783	755	776	711
										1292	8931	8987	9094	9025	8741	8305	8585	8975	8425	8625	6018	5588	5591	5653	5774	421	388	341	351	364	5498	5648	5669	5823	5742	4799	5057	4875	4794	4828	2631	2531	2581	2661	2706	784	757	777	711
										1293	8966	9019	9130	9059	8775	8335	8614	9008	8457	8658	6036	5607	5608	5674	5794	423	388	342	352	364	5516	5667	5688	5843	5762	4814	5074	4890	4807	4843	2638	2537	2588	2669	2712	787	758	779	713
										1294	8997	9051	9162	9089	8807	8364	8645	9038	8489	8690	6056	5624	5629	5692	5811	423	390	344	353	365	5533	5686	5708	5863	5781	4828	5089	4904	4823	4858	2642	2544	2596	2676	2721	789	760	782	715
										1295	9032	9085	9193	9122	8837	8394	8677	9069	8522	8719	6076	5641	5646	5712	5831	424	390	344	354	365	5549	5705	5725	5880	5797	4846	5105	4919	4839	4875	2648	2550	2604	2685	2728	790	762	784	717
										1296	9067	9117	9226	9156	8870	8427	8706	9099	8552	8749	6096	5660	5667	5730	5849	425	392	345	355	367	5571	5721	5744	5900	5819	4860	5120	4934	4855	4891	2658	2558	2611	2694	2736	792	764	785	718
										1297	9103	9152	9259	9189	8901	8454	8737	9135	8588	8780	6119	5678	5687	5749	5869	426	392	346	355	368	5593	5739	5762	5922	5837	4875	5138	4950	4871	4906	2664	2567	2620	2701	2744	794	765	787	720
										1298	9139	9185	9294	9228	8933	8483	8766	9168	8620	8810	6140	5695	5704	5769	5886	426	392	347	355	369	5608	5756	5780	5943	5857	4890	5155	4967	4890	4921	2671	2574	2626	2710	2751	797	766	789	721
										1299	9171	9218	9328	9262	8966	8511	8799	9198	8651	8841	6160	5714	5722	5788	5906	427	393	348	356	370	5629	5775	5795	5963	5874	4906	5171	4983	4904	4937	2679	2579	2634	2718	2759	799	768	791	723
										1300	9203	9251	9362	9296	9002	8540	8829	9234	8681	8877	6184	5735	5742	5809	5925	428	395	348	357	371	5646	5793	5813	5981	5893	4923	5187	4999	4919	4956	2686	2585	2642	2726	2767	801	770	793	725
										1301	9238	9283	9394	9334	9037	8569	8861	9263	8713	8908	6203	5755	5762	5828	5944	428	395	349	358	372	5665	5810	5834	6001	5910	4940	5202	5017	4934	4972	2695	2591	2651	2732	2774	803	772	795	727
										1302	9270	9319	9430	9372	9073	8605	8890	9296	8743	8941	6223	5772	5784	5848	5965	429	396	349	359	373	5684	5829	5853	6021	5930	4955	5219	5036	4948	4990	2703	2598	2658	2740	2781	805	773	797	729
										1303	9307	9355	9462	9413	9106	8634	8922	9329	8774	8969	6246	5790	5801	5865	5984	431	396	349	360	374	5706	5852	5874	6041	5952	4969	5238	5054	4964	5010	2713	2605	2665	2748	2789	807	775	799	731
										1304	9345	9388	9500	9451	9140	8667	8953	9364	8803	8999	6268	5810	5819	5885	6007	431	397	350	361	374	5721	5870	5891	6060	5975	4984	5255	5071	4980	5024	2721	2611	2672	2757	2800	810	777	801	733
										1305	9383	9428	9535	9488	9176	8698	8988	9394	8835	9028	6288	5829	5839	5905	6026	432	398	351	362	375	5738	5891	5909	6083	5996	5001	5271	5089	4996	5044	2728	2618	2680	2763	2807	811	780	804	734
										1306	9422	9461	9570	9528	9211	8730	9024	9425	8865	9061	6310	5846	5858	5925	6047	433	398	351	363	377	5758	5911	5926	6104	6016	5018	5288	5105	5011	5063	2735	2628	2686	2770	2815	813	783	806	735
										1307	9459	9496	9607	9560	9245	8761	9055	9454	8900	9095	6332	5867	5877	5945	6071	433	398	351	363	377	5778	5928	5948	6126	6033	5036	5305	5124	5027	5080	2743	2635	2694	2777	2822	816	785	808	736
										1308	9492	9533	9645	9599	9276	8793	9086	9487	8933	9128	6352	5887	5896	5964	6090	434	399	352	364	377	5796	5946	5965	6144	6055	5050	5321	5140	5045	5094	2751	2642	2700	2784	2830	818	786	810	737
										1309	9528	9566	9681	9638	9311	8823	9117	9521	8966	9161	6372	5907	5915	5983	6109	436	400	353	365	378	5815	5968	5983	6164	6076	5066	5337	5156	5064	5111	2759	2649	2705	2792	2838	820	789	812	740
										1310	9564	9603	9716	9676	9347	8852	9154	9558	9001	9199	6394	5931	5935	6002	6130	437	401	353	365	379	5832	5990	6003	6184	6097	5083	5354	5173	5082	5132	2767	2657	2713	2800	2848	821	791	814	741
										1311	9599	9640	9754	9712	9378	8884	9185	9593	9031	9234	6417	5951	5952	6022	6149	437	402	354	367	380	5852	6010	6024	6203	6118	5101	5370	5191	5096	5146	2775	2667	2720	2808	2855	822	794	816	743
										1312	9637	9678	9790	9747	9409	8916	9217	9626	9065	9268	6439	5969	5971	6041	6171	439	402	355	369	380	5876	6030	6044	6223	6139	5120	5386	5208	5110	5163	2782	2672	2729	2815	2864	824	795	818	744
										1313	9674	9714	9828	9783	9445	8952	9253	9659	9097	9298	6462	5991	5989	6060	6191	440	402	356	369	381	5896	6049	6065	6246	6159	5136	5405	5224	5128	5180	2790	2679	2737	2822	2871	826	798	820	747
										1314	9710	9752	9869	9817	9484	8985	9284	9692	9132	9326	6487	6013	6010	6081	6212	441	404	357	370	382	5916	6067	6083	6266	6181	5152	5421	5240	5147	5197	2798	2687	2744	2829	2879	828	800	821	748
										1315	9748	9789	9905	9852	9520	9016	9318	9727	9167	9362	6507	6033	6029	6106	6234	442	406	358	370	383	5935	6088	6100	6287	6201	5172	5436	5256	5162	5212	2807	2693	2751	2837	2885	831	801	824	750
										1316	9785	9825	9941	9889	9554	9048	9352	9760	9197	9398	6529	6052	6047	6127	6256	444	407	359	371	383	5953	6107	6123	6310	6223	5190	5452	5271	5179	5228	2813	2701	2757	2845	2893	832	804	826	752
										1317	9822	9864	9977	9928	9588	9079	9384	9798	9232	9430	6552	6072	6068	6149	6277	444	408	360	371	384	5974	6124	6143	6331	6245	5208	5473	5290	5195	5243	2820	2707	2765	2851	2901	833	805	827	753
										1318	9859	9899	10013	9965	9621	9114	9423	9831	9264	9463	6573	6094	6089	6170	6296	446	408	361	372	385	5995	6143	6166	6352	6270	5227	5492	5311	5212	5260	2826	2714	2773	2859	2909	835	807	829	754
										1319	9897	9934	10053	10002	9657	9148	9456	9865	9301	9499	6593	6113	6111	6192	6318	447	410	362	373	385	6017	6165	6187	6371	6294	5244	5510	5329	5231	5277	2833	2720	2781	2867	2918	836	809	830	755
										1320	9931	9972	10091	10037	9692	9181	9489	9903	9338	9532	6613	6133	6129	6212	6340	448	410	362	374	386	6033	6188	6209	6396	6313	5260	5530	5345	5246	5293	2840	2729	2791	2875	2927	839	811	831	756
										1321	9968	10007	10126	10072	9730	9211	9524	9940	9370	9567	6634	6153	6153	6235	6363	448	411	362	375	387	6050	6210	6228	6419	6334	5279	5548	5361	5263	5308	2848	2737	2795	2883	2935	841	813	834	758
										1322	10003	10042	10164	10107	9765	9247	9559	9975	9407	9600	6658	6172	6180	6257	6383	450	412	363	376	387	6070	6231	6249	6438	6354	5295	5566	5379	5278	5325	2857	2747	2804	2890	2942	843	815	837	760
										1323	10040	10077	10203	10143	9805	9280	9594	10011	9440	9632	6679	6192	6202	6279	6405	451	413	363	376	387	6090	6251	6270	6461	6376	5311	5583	5395	5295	5341	2865	2757	2812	2900	2953	845	817	838	761
										1324	10078	10116	10242	10181	9837	9311	9630	10047	9471	9667	6702	6212	6227	6301	6426	453	413	364	377	387	6109	6272	6290	6483	6396	5329	5601	5413	5313	5358	2872	2764	2821	2908	2961	848	820	841	762
										1325	10117	10153	10280	10216	9871	9342	9663	10082	9502	9700	6725	6234	6249	6323	6448	454	414	365	379	389	6130	6290	6313	6505	6417	5349	5618	5432	5330	5375	2881	2773	2828	2913	2968	851	821	843	764
										1326	10153	10191	10317	10254	9906	9378	9698	10125	9537	9733	6749	6256	6272	6343	6471	455	414	366	379	389	6150	6313	6336	6525	6438	5368	5637	5452	5349	5392	2889	2780	2837	2921	2977	853	823	844	766
										1327	10190	10229	10353	10295	9939	9411	9733	10157	9572	9766	6769	6281	6288	6363	6490	456	416	366	380	390	6171	6334	6352	6545	6458	5387	5657	5468	5365	5409	2897	2789	2844	2929	2985	856	825	846	767
										1328	10230	10269	10394	10330	9977	9445	9768	10196	9610	9803	6791	6302	6310	6381	6512	457	416	367	381	391	6192	6357	6372	6564	6478	5405	5673	5484	5383	5427	2905	2798	2851	2938	2992	857	827	848	768
										1329	10272	10308	10430	10371	10014	9477	9802	10233	9643	9839	6815	6319	6333	6401	6534	458	418	368	381	392	6211	6378	6395	6588	6500	5421	5690	5502	5400	5445	2915	2806	2860	2946	3002	859	830	850	771
										1330	10313	10347	10471	10411	10053	9512	9834	10272	9680	9875	6836	6341	6352	6426	6557	459	419	369	383	393	6229	6398	6416	6608	6523	5438	5708	5521	5422	5464	2922	2813	2866	2955	3010	861	832	851	772
										1331	10348	10379	10508	10451	10091	9543	9869	10309	9716	9915	6862	6361	6374	6451	6579	461	419	370	384	394	6249	6419	6436	6632	6546	5454	5727	5538	5436	5480	2929	2819	2875	2963	3019	863	834	854	773
										1332	10391	10417	10547	10484	10127	9579	9904	10346	9751	9952	6883	6383	6398	6475	6602	462	420	372	385	395	6268	6441	6458	6654	6566	5469	5746	5556	5455	5497	2938	2827	2884	2972	3028	865	836	856	775
										1333	10430	10457	10586	10526	10165	9619	9943	10384	9787	9991	6902	6405	6421	6497	6622	463	421	372	386	397	6287	6462	6480	6675	6586	5487	5761	5571	5473	5515	2946	2836	2892	2982	3037	866	838	857	778
										1334	10470	10495	10628	10567	10204	9652	9980	10424	9821	10029	6925	6425	6443	6518	6647	463	422	373	386	398	6309	6481	6501	6695	6609	5506	5781	5588	5491	5532	2954	2843	2899	2991	3043	869	841	858	780
										1335	10505	10537	10670	10607	10243	9686	10018	10460	9858	10062	6949	6443	6467	6539	6663	464	423	374	387	398	6329	6504	6521	6717	6632	5524	5798	5606	5508	5550	2962	2850	2907	3001	3052	871	844	860	783
										1336	10543	10575	10712	10646	10281	9723	10054	10497	9893	10097	6970	6465	6487	6563	6684	465	423	375	387	399	6348	6524	6543	6739	6656	5541	5818	5627	5526	5568	2970	2859	2914	3010	3059	873	845	862	784
										1337	10582	10609	10751	10687	10320	9755	10094	10532	9927	10134	6995	6489	6508	6586	6705	466	424	375	388	400	6369	6544	6565	6762	6675	5562	5839	5645	5547	5584	2979	2868	2922	3017	3068	875	848	865	786
										1338	10623	10652	10793	10728	10358	9791	10136	10572	9962	10170	7020	6513	6530	6606	6727	467	426	376	389	401	6392	6568	6588	6786	6699	5580	5855	5665	5564	5603	2988	2876	2931	3027	3078	877	850	867	788
										1339	10663	10695	10835	10768	10393	9826	10174	10611	9997	10209	7044	6536	6554	6631	6751	469	426	377	389	401	6413	6588	6611	6810	6721	5596	5876	5682	5579	5621	2997	2885	2940	3035	3085	880	852	869	791
										1340	10704	10740	10874	10807	10433	9862	10213	10644	10035	10248	7070	6559	6577	6653	6774	469	428	378	390	402	6433	6611	6635	6834	6741	5612	5893	5699	5596	5636	3004	2892	2949	3044	3094	881	854	871	793
										1341	10745	10779	10916	10846	10475	9896	10252	10686	10074	10279	7095	6583	6601	6677	6796	470	429	378	390	404	6455	6632	6657	6856	6762	5629	5911	5718	5614	5652	3012	2902	2958	3053	3103	884	856	873	795
										1342	10785	10814	10954	10883	10513	9933	10291	10725	10110	10312	7120	6605	6624	6701	6821	471	429	379	391	404	6476	6653	6682	6877	6784	5648	5930	5736	5632	5667	3021	2910	2965	3059	3113	887	858	875	797
										1343	10825	10853	10992	10922	10550	9970	10323	10765	10144	10347	7147	6628	6644	6724	6845	472	431	379	392	405	6497	6676	6705	6898	6806	5664	5950	5753	5653	5687	3031	2919	2973	3067	3122	890	860	877	799
										1344	10864	10891	11032	10963	10591	10006	10360	10800	10181	10382	7172	6649	6667	6747	6870	473	432	382	393	407	6519	6697	6728	6917	6830	5680	5969	5773	5674	5704	3038	2929	2983	3078	3131	892	861	879	800
										1345	10903	10936	11070	11005	10633	10041	10398	10839	10218	10419	7195	6671	6690	6771	6893	474	434	383	394	408	6541	6721	6755	6938	6852	5697	5990	5791	5690	5724	3045	2939	2990	3086	3138	894	865	882	802
										1346	10941	10977	11109	11044	10670	10078	10437	10881	10256	10457	7221	6697	6713	6792	6915	475	435	383	395	408	6563	6744	6776	6962	6875	5715	6009	5810	5711	5745	3053	2946	2999	3096	3147	898	866	884	805
										1347	10982	11018	11152	11085	10708	10113	10473	10922	10292	10494	7244	6719	6740	6812	6937	476	436	384	395	409	6586	6767	6799	6984	6898	5735	6030	5828	5733	5763	3061	2955	3008	3104	3156	901	868	887	807
										1348	11025	11055	11195	11128	10745	10147	10512	10963	10327	10530	7269	6741	6767	6835	6959	477	437	386	396	410	6606	6794	6825	7006	6923	5753	6050	5845	5749	5782	3068	2967	3018	3113	3165	902	870	889	809
										1349	11064	11094	11238	11168	10783	10183	10547	11005	10364	10567	7293	6764	6792	6859	6985	478	438	387	397	410	6631	6816	6846	7032	6947	5769	6068	5864	5768	5800	3077	2976	3028	3121	3176	903	872	892	811
										1350	11103	11136	11279	11206	10822	10221	10584	11047	10401	10604	7321	6786	6818	6880	7009	480	440	387	398	411	6656	6841	6873	7054	6968	5788	6088	5886	5785	5818	3089	2984	3035	3130	3184	905	874	894	812
										1351	11146	11176	11320	11249	10862	10258	10622	11085	10437	10643	7346	6808	6841	6904	7030	481	441	387	398	412	6679	6862	6896	7076	6991	5807	6105	5902	5805	5839	3097	2991	3044	3139	3194	907	877	898	814
										1352	11187	11218	11363	11296	10903	10298	10658	11127	10475	10680	7371	6829	6865	6926	7053	482	442	388	399	413	6701	6885	6918	7095	7014	5824	6124	5921	5824	5859	3106	2999	3053	3146	3200	907	880	900	815
										1353	11229	11257	11404	11340	10944	10335	10698	11168	10513	10721	7396	6853	6888	6951	7080	482	443	388	400	414	6723	6906	6940	7118	7037	5847	6144	5937	5842	5873	3114	3006	3060	3159	3208	908	881	903	816
										1354	11273	11297	11444	11377	10986	10375	10736	11209	10556	10762	7423	6874	6912	6975	7106	483	444	390	400	415	6745	6928	6960	7138	7063	5864	6165	5958	5860	5889	3122	3013	3069	3166	3217	910	885	905	819
										1355	11315	11338	11485	11417	11026	10410	10776	11247	10593	10799	7450	6897	6936	6998	7130	484	445	390	400	415	6766	6953	6980	7158	7085	5886	6185	5976	5880	5910	3130	3021	3078	3175	3227	912	887	907	822
										1356	11359	11379	11525	11463	11068	10445	10811	11288	10628	10838	7475	6919	6958	7025	7151	485	446	391	401	416	6787	6976	7003	7181	7109	5906	6207	5995	5899	5926	3140	3028	3086	3184	3235	914	889	910	826
										1357	11400	11419	11566	11513	11111	10486	10851	11327	10666	10876	7501	6943	6983	7050	7173	486	447	391	402	417	6807	7001	7027	7204	7134	5924	6232	6014	5917	5946	3148	3038	3095	3192	3246	917	891	912	827
										1358	11443	11461	11608	11554	11151	10524	10889	11370	10704	10917	7524	6967	7007	7071	7196	487	448	392	402	418	6826	7027	7048	7227	7159	5943	6253	6034	5935	5964	3157	3045	3102	3200	3257	919	893	915	829
										1359	11483	11501	11648	11596	11193	10563	10932	11410	10745	10956	7549	6992	7032	7094	7223	488	449	392	403	419	6848	7053	7071	7250	7183	5961	6274	6052	5958	5985	3166	3053	3110	3208	3266	922	896	918	830
										1360	11524	11541	11693	11640	11235	10599	10974	11452	10786	10992	7577	7015	7058	7121	7252	489	449	393	405	422	6874	7076	7095	7275	7207	5980	6292	6070	5980	6005	3174	3061	3119	3218	3276	923	897	921	832
										1361	11569	11582	11738	11682	11274	10639	11015	11494	10828	11030	7602	7038	7082	7143	7274	490	450	394	406	422	6900	7099	7120	7299	7231	5998	6314	6089	6001	6024	3183	3072	3127	3228	3283	926	899	923	834
										1362	11610	11626	11781	11727	11316	10675	11056	11541	10865	11073	7626	7061	7106	7163	7298	491	451	395	408	423	6920	7122	7141	7323	7252	6018	6334	6110	6017	6044	3192	3081	3135	3237	3293	929	901	926	836
										1363	11652	11673	11827	11770	11355	10713	11095	11583	10900	11115	7653	7088	7130	7190	7322	493	452	395	408	424	6942	7143	7163	7348	7278	6041	6354	6129	6038	6062	3201	3091	3143	3245	3303	931	903	929	838
										1364	11698	11713	11868	11813	11399	10750	11134	11626	10944	11156	7674	7112	7156	7215	7346	495	454	397	409	425	6965	7168	7185	7371	7306	6063	6375	6148	6055	6081	3210	3099	3151	3256	3308	933	905	931	839
										1365	11744	11759	11910	11855	11442	10790	11176	11671	10984	11196	7699	7135	7180	7237	7371	496	455	398	411	426	6989	7190	7210	7396	7329	6082	6396	6169	6076	6099	3218	3108	3160	3265	3318	935	907	932	841
										1366	11788	11801	11955	11898	11486	10830	11222	11711	11025	11239	7726	7161	7207	7261	7397	498	455	399	412	427	7010	7217	7235	7420	7352	6099	6417	6189	6097	6124	3227	3117	3170	3274	3328	937	909	934	845
										1367	11830	11846	12000	11938	11534	10867	11265	11753	11068	11278	7752	7190	7230	7283	7422	499	457	399	413	428	7033	7239	7257	7444	7377	6119	6437	6209	6116	6140	3238	3125	3178	3283	3337	938	911	937	848
										1368	11872	11892	12045	11986	11576	10907	11310	11796	11109	11320	7775	7214	7252	7307	7451	501	459	400	413	428	7057	7263	7282	7469	7399	6138	6455	6226	6138	6159	3247	3133	3187	3292	3347	941	913	940	849
										1369	11914	11935	12087	12034	11618	10948	11349	11840	11148	11364	7804	7237	7278	7335	7478	501	460	401	415	430	7081	7284	7302	7492	7420	6160	6476	6245	6155	6182	3259	3142	3197	3301	3357	943	915	943	851
										1370	11957	11976	12129	12082	11661	10989	11392	11883	11185	11405	7830	7262	7301	7359	7502	502	461	402	416	431	7103	7310	7330	7518	7445	6179	6497	6267	6175	6204	3268	3149	3207	3311	3366	945	916	945	854
										1371	12001	12017	12174	12124	11701	11030	11434	11925	11223	11447	7854	7284	7326	7384	7528	503	461	402	416	432	7126	7335	7355	7541	7472	6197	6519	6286	6195	6224	3276	3158	3218	3320	3376	948	919	948	855
										1372	12043	12054	12221	12173	11748	11072	11480	11968	11263	11490	7883	7306	7350	7409	7554	503	462	404	417	433	7148	7357	7379	7567	7494	6219	6541	6308	6219	6246	3285	3168	3227	3330	3385	952	922	950	859
										1373	12092	12100	12264	12222	11789	11115	11519	12013	11303	11532	7910	7332	7376	7436	7580	505	463	404	418	434	7170	7381	7405	7593	7518	6241	6560	6326	6242	6270	3292	3178	3236	3338	3393	953	925	951	862
										1374	12132	12142	12308	12270	11834	11153	11558	12056	11342	11574	7937	7357	7400	7460	7606	506	465	405	419	435	7192	7403	7427	7618	7544	6261	6586	6349	6261	6292	3300	3188	3246	3347	3401	955	928	954	865
										1375	12177	12185	12350	12314	11879	11193	11599	12097	11382	11615	7964	7384	7422	7486	7633	507	465	406	420	436	7216	7424	7455	7644	7568	6285	6607	6368	6279	6314	3307	3198	3258	3358	3410	958	930	957	867
										1376	12220	12231	12397	12357	11923	11237	11639	12138	11423	11656	7990	7409	7453	7512	7659	509	465	407	420	437	7240	7449	7477	7668	7595	6305	6631	6391	6298	6336	3319	3209	3264	3367	3421	960	932	959	869
										1377	12261	12279	12439	12402	11966	11277	11681	12185	11466	11702	8015	7436	7477	7538	7686	511	467	408	422	438	7266	7473	7499	7696	7619	6323	6652	6410	6320	6358	3329	3218	3275	3377	3428	963	934	962	872
										1378	12307	12327	12487	12451	12009	11318	11723	12227	11509	11747	8042	7460	7502	7561	7715	512	468	410	423	439	7289	7497	7528	7721	7646	6343	6673	6430	6340	6375	3338	3226	3282	3387	3438	965	936	964	875
										1379	12353	12372	12530	12495	12056	11358	11768	12270	11550	11794	8072	7481	7528	7586	7741	513	469	410	423	440	7313	7523	7551	7747	7671	6362	6696	6448	6357	6394	3349	3235	3293	3396	3448	966	939	965	877
										1380	12395	12423	12572	12544	12106	11401	11807	12314	11590	11837	8100	7508	7554	7613	7769	515	470	412	424	442	7338	7547	7575	7773	7696	6382	6717	6467	6375	6414	3359	3244	3304	3405	3459	968	941	967	879
										1381	12438	12470	12616	12591	12150	11446	11848	12357	11632	11881	8128	7531	7583	7643	7797	516	471	412	425	443	7360	7572	7595	7799	7722	6400	6740	6487	6396	6434	3366	3251	3317	3413	3470	969	943	969	881
										1382	12485	12512	12658	12641	12193	11488	11888	12402	11671	11923	8152	7558	7610	7668	7822	518	472	412	426	444	7385	7597	7619	7829	7747	6422	6764	6507	6416	6456	3376	3262	3325	3423	3482	971	944	970	883
										1383	12532	12561	12703	12684	12238	11528	11929	12450	11715	11966	8181	7585	7635	7696	7850	519	472	413	427	445	7408	7619	7644	7854	7771	6444	6787	6526	6434	6476	3385	3272	3334	3433	3493	974	946	974	885
										1384	12580	12607	12750	12734	12283	11573	11969	12499	11756	12009	8209	7612	7658	7721	7877	520	473	414	428	447	7431	7643	7668	7879	7796	6464	6809	6549	6456	6497	3395	3281	3344	3443	3503	976	949	977	887
										1385	12629	12653	12797	12780	12329	11617	12012	12543	11800	12054	8240	7639	7684	7749	7903	522	475	415	429	448	7454	7667	7692	7902	7822	6486	6831	6571	6473	6517	3405	3289	3354	3453	3515	980	951	980	889
										1386	12672	12701	12846	12828	12372	11659	12056	12588	11847	12098	8267	7661	7708	7776	7930	523	476	415	430	449	7472	7694	7720	7926	7846	6508	6851	6594	6494	6535	3415	3298	3363	3462	3524	982	954	983	890
										1387	12720	12750	12895	12877	12414	11702	12100	12637	11889	12139	8297	7689	7734	7804	7954	525	477	416	430	450	7497	7716	7746	7955	7870	6531	6875	6616	6516	6559	3424	3307	3374	3474	3534	985	955	987	892
										1388	12763	12792	12941	12925	12464	11741	12138	12686	11931	12183	8325	7716	7760	7832	7978	526	479	417	431	450	7520	7745	7768	7978	7897	6550	6897	6637	6534	6581	3435	3317	3384	3483	3545	987	958	989	894
										1389	12810	12839	12991	12972	12509	11785	12182	12733	11975	12229	8353	7739	7787	7856	8008	527	479	418	432	452	7546	7770	7790	8005	7922	6574	6916	6657	6556	6599	3447	3326	3394	3492	3555	989	961	991	896
										1390	12857	12891	13033	13018	12557	11827	12227	12782	12018	12273	8380	7770	7815	7882	8034	528	481	419	433	453	7569	7795	7814	8029	7948	6597	6939	6678	6577	6616	3459	3336	3403	3501	3565	992	963	994	899
										1391	12906	12934	13080	13066	12601	11869	12273	12826	12059	12319	8411	7794	7842	7908	8060	529	482	420	433	453	7593	7818	7842	8055	7974	6619	6963	6701	6597	6636	3471	3344	3413	3511	3578	994	965	996	902
										1392	12956	12982	13126	13114	12648	11913	12320	12871	12104	12362	8440	7820	7868	7930	8087	530	483	421	434	455	7618	7843	7867	8081	8000	6642	6986	6722	6621	6657	3482	3354	3423	3522	3587	997	966	998	905
										1393	13005	13032	13176	13163	12690	11956	12362	12922	12148	12411	8471	7845	7895	7960	8111	532	484	422	435	455	7640	7873	7891	8109	8024	6667	7006	6743	6642	6679	3492	3362	3434	3532	3597	999	968	1000	907
										1394	13054	13084	13229	13213	12741	12001	12406	12968	12189	12459	8499	7873	7919	7987	8138	533	485	424	436	457	7663	7898	7917	8132	8052	6688	7026	6764	6661	6701	3502	3370	3444	3543	3609	1002	972	1003	908
										1395	13105	13134	13280	13267	12786	12046	12453	13021	12232	12505	8528	7898	7946	8013	8164	535	486	425	436	459	7685	7924	7944	8157	8078	6710	7049	6783	6684	6722	3510	3379	3453	3551	3621	1005	974	1005	910
										1396	13153	13181	13331	13315	12832	12093	12500	13069	12280	12554	8556	7925	7974	8042	8189	536	486	426	437	460	7708	7947	7969	8188	8106	6730	7069	6805	6705	6746	3518	3388	3462	3562	3631	1007	976	1008	912
										1397	13201	13228	13384	13362	12880	12137	12545	13115	12326	12600	8584	7954	7999	8068	8219	538	487	427	438	461	7734	7973	7995	8214	8134	6755	7092	6824	6728	6768	3530	3398	3471	3573	3644	1011	978	1010	915
										1398	13253	13276	13433	13410	12927	12183	12590	13161	12369	12644	8618	7979	8026	8096	8249	539	489	428	438	462	7761	8000	8021	8243	8160	6776	7116	6847	6751	6789	3541	3410	3481	3585	3656	1015	980	1014	918
										1399	13302	13327	13483	13466	12973	12225	12635	13208	12413	12689	8647	8006	8055	8123	8276	540	490	428	440	463	7786	8024	8048	8270	8188	6799	7140	6866	6769	6812	3550	3418	3492	3593	3667	1016	982	1018	920
										1400	13354	13376	13531	13522	13025	12271	12678	13255	12455	12739	8676	8033	8084	8151	8307	541	491	429	441	464	7814	8051	8074	8294	8212	6821	7163	6889	6789	6835	3561	3430	3501	3604	3676	1019	984	1020	922
										1401	13401	13430	13585	13572	13072	12314	12727	13303	12499	12785	8708	8064	8107	8174	8333	543	493	430	442	466	7837	8079	8099	8322	8237	6843	7189	6911	6808	6858	3570	3438	3511	3613	3686	1021	986	1023	924
										1402	13456	13481	13636	13621	13123	12360	12777	13350	12543	12828	8738	8095	8132	8204	8362	545	495	431	442	467	7862	8102	8128	8351	8262	6863	7210	6931	6833	6879	3582	3448	3521	3624	3696	1024	988	1025	927
										1403	13506	13530	13692	13673	13175	12407	12822	13402	12586	12872	8768	8122	8158	8235	8389	545	496	432	444	467	7890	8128	8156	8378	8288	6886	7232	6952	6852	6904	3591	3457	3530	3634	3707	1027	991	1030	928
										1404	13557	13584	13744	13725	13228	12451	12872	13451	12631	12922	8800	8150	8184	8261	8417	548	497	432	445	469	7918	8154	8181	8407	8315	6910	7255	6974	6875	6926	3601	3466	3540	3644	3717	1030	993	1032	931
										1405	13608	13640	13798	13779	13280	12495	12920	13504	12672	12969	8833	8181	8209	8289	8445	549	497	434	446	470	7944	8179	8206	8436	8344	6931	7279	6995	6900	6950	3611	3478	3550	3653	3727	1032	996	1035	934
										1406	13660	13696	13850	13832	13333	12537	12965	13552	12716	13018	8862	8208	8238	8317	8478	550	499	435	447	472	7975	8209	8230	8465	8368	6953	7303	7018	6920	6976	3622	3487	3560	3664	3737	1035	998	1037	935
										1407	13710	13750	13902	13885	13384	12585	13010	13605	12760	13067	8891	8234	8268	8344	8506	552	500	435	449	472	8002	8237	8258	8493	8395	6977	7325	7042	6943	6999	3629	3496	3569	3674	3747	1038	1000	1039	938
										1408	13759	13803	13955	13931	13434	12629	13060	13654	12806	13114	8922	8265	8297	8373	8534	554	501	436	451	473	8026	8263	8281	8520	8425	7000	7351	7068	6965	7022	3641	3504	3580	3683	3758	1042	1003	1042	941
										1409	13809	13852	14006	13984	13480	12671	13109	13704	12848	13159	8952	8291	8324	8399	8559	555	502	437	452	475	8051	8291	8307	8546	8452	7025	7373	7091	6985	7044	3653	3514	3589	3694	3771	1044	1006	1045	944
										1410	13864	13900	14056	14037	13527	12714	13156	13750	12891	13211	8987	8322	8357	8426	8588	556	503	438	455	475	8077	8317	8338	8575	8481	7051	7399	7112	7007	7068	3663	3525	3599	3704	3782	1047	1008	1047	946
										1411	13916	13951	14108	14088	13580	12758	13203	13803	12936	13253	9016	8348	8383	8455	8618	557	503	439	455	475	8105	8342	8365	8602	8510	7076	7425	7134	7030	7092	3673	3535	3608	3716	3795	1049	1011	1051	948
										1412	13969	14001	14159	14139	13630	12801	13250	13848	12983	13300	9048	8378	8413	8485	8644	558	504	439	456	477	8131	8372	8393	8631	8541	7097	7449	7158	7053	7120	3683	3544	3619	3725	3806	1052	1013	1053	951
										1413	14022	14054	14215	14188	13682	12848	13299	13898	13030	13345	9078	8408	8443	8513	8673	560	505	440	457	478	8157	8395	8420	8659	8570	7119	7475	7181	7074	7141	3692	3554	3630	3734	3817	1055	1016	1057	954
										1414	14076	14106	14268	14241	13730	12896	13345	13949	13077	13391	9106	8436	8473	8541	8704	561	506	441	458	479	8184	8424	8449	8688	8600	7144	7500	7207	7098	7163	3704	3564	3642	3744	3830	1059	1018	1061	957
										1415	14123	14155	14324	14292	13779	12942	13392	14000	13126	13440	9136	8466	8503	8568	8736	562	508	442	458	480	8215	8450	8475	8715	8632	7166	7523	7232	7121	7186	3716	3576	3654	3756	3840	1062	1020	1063	959
										1416	14175	14206	14380	14345	13828	12989	13442	14054	13176	13487	9165	8495	8532	8598	8768	563	509	442	459	481	8241	8481	8502	8748	8660	7190	7548	7258	7144	7209	3724	3585	3663	3766	3852	1063	1022	1065	962
										1417	14229	14261	14436	14400	13878	13033	13493	14103	13221	13533	9197	8524	8563	8628	8799	564	509	443	461	482	8270	8508	8533	8779	8691	7212	7576	7282	7166	7234	3734	3595	3673	3777	3865	1066	1026	1067	964
										1418	14282	14312	14487	14454	13933	13077	13543	14154	13267	13583	9230	8553	8590	8660	8827	565	510	443	462	483	8299	8535	8560	8809	8719	7235	7599	7303	7188	7259	3746	3605	3685	3788	3877	1069	1028	1070	967
										1419	14332	14370	14544	14506	13986	13126	13598	14208	13315	13634	9266	8585	8617	8687	8857	566	511	445	463	483	8328	8562	8589	8837	8745	7259	7623	7327	7215	7281	3756	3615	3694	3800	3888	1072	1032	1072	971
										1420	14383	14422	14602	14557	14036	13175	13649	14262	13364	13682	9299	8615	8645	8713	8885	568	514	445	465	485	8355	8590	8618	8865	8773	7282	7644	7352	7239	7305	3767	3626	3703	3810	3896	1073	1034	1076	972
										1421	14434	14474	14656	14610	14092	13219	13695	14314	13408	13729	9331	8644	8674	8742	8916	569	514	447	465	486	8379	8616	8648	8892	8804	7305	7668	7375	7263	7331	3777	3637	3713	3820	3908	1076	1037	1079	975
										1422	14486	14526	14709	14664	14148	13268	13745	14364	13455	13775	9365	8674	8704	8774	8947	571	515	448	466	488	8405	8644	8676	8921	8833	7330	7694	7397	7285	7358	3789	3646	3723	3834	3921	1080	1039	1081	977
										1423	14538	14577	14764	14716	14201	13319	13795	14415	13501	13821	9397	8704	8736	8805	8975	572	517	449	466	488	8437	8673	8702	8951	8861	7352	7721	7424	7305	7381	3799	3657	3730	3844	3931	1083	1042	1083	980
										1424	14590	14634	14819	14770	14252	13367	13847	14468	13549	13871	9427	8734	8763	8839	9005	574	517	449	467	490	8466	8705	8734	8982	8891	7376	7748	7450	7328	7405	3811	3666	3740	3855	3944	1087	1044	1085	982
										1425	14646	14689	14876	14818	14300	13417	13895	14522	13596	13923	9457	8762	8791	8869	9034	575	518	451	468	491	8497	8733	8768	9010	8921	7402	7772	7476	7353	7429	3821	3674	3752	3864	3956	1090	1048	1089	984
										1426	14702	14747	14934	14876	14356	13463	13948	14576	13645	13973	9492	8793	8821	8899	9062	577	521	452	469	492	8525	8761	8791	9037	8948	7426	7799	7499	7377	7453	3830	3684	3762	3873	3966	1092	1050	1092	987
										1427	14753	14798	14995	14936	14411	13508	14000	14628	13695	14026	9526	8821	8852	8931	9098	579	521	452	470	494	8555	8791	8819	9068	8978	7448	7821	7527	7401	7477	3838	3695	3772	3883	3976	1095	1053	1095	988
										1428	14808	14852	15053	14989	14466	13553	14051	14683	13744	14080	9558	8851	8882	8962	9128	579	522	453	470	495	8585	8818	8849	9097	9008	7473	7850	7552	7425	7502	3850	3708	3783	3894	3987	1096	1056	1098	991
										1429	14866	14906	15110	15044	14521	13599	14103	14735	13797	14129	9589	8879	8910	8993	9161	581	524	453	472	496	8615	8852	8876	9131	9037	7493	7873	7579	7448	7526	3861	3719	3792	3905	3997	1100	1059	1099	994
										1430	14916	14960	15168	15100	14577	13647	14157	14791	13849	14180	9621	8906	8938	9026	9193	581	526	454	473	497	8643	8879	8908	9163	9065	7518	7897	7603	7474	7552	3871	3730	3804	3915	4007	1103	1061	1102	996
										1431	14970	15019	15227	15154	14637	13694	14209	14849	13900	14231	9653	8935	8967	9053	9225	582	527	456	474	499	8672	8909	8938	9195	9090	7542	7926	7630	7500	7575	3883	3740	3814	3926	4020	1105	1064	1106	999
										1432	15026	15078	15286	15209	14694	13743	14263	14901	13950	14281	9689	8967	8997	9085	9257	583	528	456	475	500	8702	8937	8967	9226	9119	7564	7950	7656	7527	7601	3894	3753	3825	3935	4029	1108	1066	1110	1002
										1433	15077	15136	15342	15264	14752	13790	14317	14955	13997	14331	9721	8995	9028	9117	9290	585	529	457	475	501	8728	8965	8998	9259	9146	7587	7976	7680	7551	7626	3904	3767	3836	3947	4042	1110	1070	1112	1004
										1434	15131	15190	15398	15320	14808	13841	14367	15010	14047	14383	9752	9026	9055	9150	9322	586	530	458	477	501	8755	8999	9032	9291	9175	7611	8001	7707	7575	7649	3913	3776	3849	3958	4057	1113	1071	1115	1007
										1435	15188	15250	15458	15373	14864	13890	14419	15063	14098	14438	9788	9057	9084	9180	9356	587	532	460	479	503	8786	9030	9063	9325	9208	7633	8027	7731	7601	7675	3926	3788	3861	3969	4070	1116	1074	1119	1009
										1436	15246	15305	15513	15432	14919	13940	14472	15118	14146	14482	9821	9086	9116	9213	9395	589	533	461	480	505	8813	9063	9091	9355	9238	7657	8051	7757	7625	7699	3938	3797	3871	3979	4081	1119	1077	1122	1011
										1437	15303	15364	15573	15486	14978	13991	14527	15170	14197	14536	9856	9120	9143	9243	9425	590	535	462	481	505	8842	9092	9120	9389	9267	7683	8078	7782	7649	7724	3950	3808	3884	3993	4092	1122	1079	1125	1014
										1438	15363	15424	15632	15545	15035	14042	14579	15225	14246	14590	9890	9149	9175	9271	9458	593	536	463	482	505	8874	9117	9148	9419	9295	7706	8104	7809	7673	7749	3961	3819	3894	4006	4105	1124	1082	1128	1017
										1439	15423	15483	15693	15602	15087	14090	14631	15278	14298	14645	9925	9180	9210	9306	9493	595	538	464	482	506	8905	9147	9180	9452	9325	7730	8131	7834	7700	7776	3974	3831	3905	4020	4116	1126	1084	1130	1018
										1440	15482	15540	15750	15664	15141	14142	14679	15331	14354	14703	9962	9211	9239	9334	9525	596	539	466	483	508	8937	9180	9210	9484	9365	7758	8158	7860	7726	7799	3988	3840	3916	4033	4128	1128	1087	1132	1020
										1441	15540	15599	15807	15721	15198	14192	14731	15385	14402	14757	9996	9242	9272	9367	9560	597	540	468	485	509	8963	9208	9240	9520	9394	7785	8184	7884	7745	7825	4000	3848	3927	4045	4139	1131	1090	1135	1024
										1442	15596	15657	15866	15784	15251	14245	14780	15438	14452	14809	10031	9272	9303	9400	9588	598	541	468	486	509	8992	9238	9270	9553	9424	7810	8213	7908	7768	7853	4011	3859	3939	4055	4148	1134	1093	1137	1026
										1443	15654	15715	15924	15844	15307	14294	14835	15498	14504	14863	10066	9302	9332	9436	9622	600	543	469	488	511	9022	9268	9299	9585	9455	7834	8240	7936	7794	7878	4019	3871	3948	4065	4160	1137	1095	1139	1028
										1444	15713	15778	15980	15904	15369	14346	14888	15550	14560	14915	10101	9333	9363	9467	9650	602	543	470	490	512	9053	9296	9330	9615	9487	7861	8267	7961	7818	7902	4030	3881	3958	4075	4172	1140	1098	1140	1032
										1445	15773	15839	16042	15964	15425	14398	14939	15604	14613	14966	10132	9363	9393	9500	9683	602	545	472	491	513	9085	9326	9359	9649	9517	7884	8295	7987	7846	7925	4041	3893	3970	4089	4183	1143	1102	1142	1035
										1446	15832	15893	16102	16026	15479	14451	14992	15660	14667	15021	10167	9396	9426	9531	9716	603	546	473	492	515	9114	9360	9393	9679	9549	7906	8322	8012	7872	7948	4054	3905	3983	4100	4196	1145	1105	1145	1037
										1447	15892	15954	16159	16080	15536	14502	15046	15714	14716	15075	10201	9430	9459	9562	9748	605	547	474	493	516	9145	9386	9428	9709	9581	7933	8347	8038	7899	7974	4063	3917	3995	4115	4206	1149	1108	1148	1041
										1448	15956	16017	16217	16145	15594	14556	15101	15769	14767	15126	10237	9462	9492	9593	9783	606	547	475	494	517	9171	9417	9457	9743	9609	7960	8374	8065	7926	8000	4076	3927	4005	4126	4217	1152	1111	1150	1043
										1449	16016	16072	16278	16208	15652	14609	15153	15826	14823	15183	10271	9496	9525	9623	9816	608	548	476	495	519	9203	9450	9482	9776	9639	7985	8399	8091	7950	8027	4089	3938	4018	4137	4229	1156	1114	1153	1047
										1450	16086	16131	16334	16271	15713	14655	15210	15885	14880	15238	10307	9528	9556	9657	9850	609	549	476	496	519	9231	9481	9511	9807	9673	8011	8427	8117	7979	8051	4099	3950	4030	4148	4239	1158	1117	1156	1049
										1451	16150	16193	16398	16332	15773	14713	15268	15938	14939	15295	10341	9558	9589	9690	9884	611	550	477	498	520	9261	9517	9542	9840	9701	8035	8455	8143	8006	8079	4111	3961	4041	4159	4250	1162	1120	1158	1051
										1452	16213	16252	16464	16392	15829	14760	15318	15994	14991	15348	10379	9595	9618	9723	9917	612	551	478	500	521	9292	9548	9572	9876	9729	8062	8481	8171	8031	8106	4121	3973	4053	4171	4261	1164	1123	1160	1055
										1453	16271	16308	16525	16451	15887	14810	15372	16046	15047	15406	10416	9629	9650	9756	9947	614	552	478	501	522	9323	9581	9606	9910	9761	8084	8509	8194	8059	8131	4131	3984	4064	4181	4273	1168	1126	1163	1058
										1454	16340	16370	16586	16510	15943	14864	15427	16102	15102	15465	10454	9662	9682	9793	9978	617	553	479	503	524	9353	9611	9637	9941	9796	8109	8535	8221	8085	8160	4146	3993	4073	4192	4284	1170	1130	1167	1060
										1455	16400	16430	16652	16572	16004	14918	15481	16160	15155	15516	10490	9695	9712	9827	10015	619	555	480	504	525	9384	9642	9668	9970	9828	8135	8562	8250	8110	8186	4158	4006	4083	4203	4294	1172	1133	1169	1062
										1456	16462	16489	16722	16638	16067	14978	15539	16221	15212	15571	10526	9727	9745	9860	10048	620	557	482	505	527	9416	9673	9698	10005	9860	8164	8589	8280	8141	8210	4168	4019	4096	4215	4308	1175	1137	1172	1065
										1457	16522	16549	16788	16697	16125	15028	15594	16276	15265	15626	10560	9758	9776	9890	10082	620	559	483	506	527	9442	9707	9732	10037	9892	8190	8617	8305	8168	8236	4183	4030	4105	4228	4317	1180	1139	1175	1068
										1458	16584	16610	16847	16761	16186	15085	15647	16337	15319	15683	10591	9788	9810	9925	10120	622	560	484	507	528	9479	9741	9763	10072	9929	8216	8644	8332	8194	8265	4194	4041	4116	4242	4330	1182	1141	1177	1071
										1459	16644	16670	16913	16825	16244	15141	15707	16393	15377	15739	10630	9820	9843	9959	10156	624	562	486	509	530	9512	9774	9793	10106	9960	8241	8672	8357	8222	8290	4209	4053	4126	4255	4342	1186	1144	1180	1073
										1460	16706	16731	16977	16890	16303	15193	15761	16452	15437	15792	10667	9850	9877	9997	10190	624	564	487	510	531	9541	9809	9826	10143	9990	8266	8700	8385	8249	8319	4222	4063	4139	4267	4354	1190	1147	1183	1075
										1461	16765	16793	17044	16954	16362	15247	15817	16509	15493	15847	10702	9883	9912	10035	10222	626	566	488	511	532	9569	9843	9859	10178	10023	8291	8726	8409	8276	8346	4233	4071	4151	4277	4367	1193	1149	1186	1078
										1462	16826	16856	17113	17011	16419	15301	15872	16570	15550	15900	10741	9915	9946	10070	10257	628	566	489	512	533	9598	9876	9891	10214	10055	8319	8753	8436	8300	8374	4247	4083	4163	4288	4380	1196	1151	1189	1081
										1463	16887	16920	17177	17074	16480	15358	15935	16628	15603	15959	10778	9953	9978	10106	10295	630	568	490	513	534	9626	9907	9924	10245	10087	8348	8780	8460	8325	8401	4259	4095	4176	4299	4394	1198	1156	1192	1084
										1464	16959	16987	17241	17136	16541	15412	15990	16689	15659	16019	10819	9987	10011	10142	10331	632	568	490	514	535	9662	9939	9955	10277	10120	8374	8811	8490	8350	8429	4270	4107	4189	4313	4406	1201	1160	1194	1087
										1465	17024	17052	17306	17202	16604	15468	16045	16754	15713	16076	10853	10018	10045	10174	10368	633	569	491	515	536	9691	9973	9989	10313	10152	8402	8839	8517	8376	8456	4284	4120	4202	4326	4419	1205	1163	1196	1090
										1466	17089	17115	17367	17268	16669	15525	16104	16814	15769	16135	10891	10051	10079	10209	10403	635	570	493	516	538	9722	10009	10026	10345	10187	8429	8869	8551	8404	8485	4294	4131	4212	4337	4432	1208	1167	1199	1092
										1467	17157	17176	17433	17334	16732	15584	16161	16876	15821	16187	10930	10088	10114	10243	10441	636	572	494	516	539	9755	10043	10060	10383	10220	8457	8897	8579	8429	8513	4305	4145	4224	4348	4444	1211	1169	1202	1095
										1468	17226	17242	17497	17399	16793	15639	16216	16939	15878	16243	10969	10123	10146	10276	10475	637	573	495	517	540	9788	10073	10093	10415	10249	8488	8927	8609	8456	8543	4318	4155	4236	4361	4457	1214	1172	1205	1097
										1469	17290	17312	17558	17466	16853	15698	16276	17008	15931	16299	11005	10156	10181	10310	10513	638	573	495	517	541	9818	10104	10125	10449	10282	8515	8960	8637	8488	8572	4330	4165	4249	4373	4468	1217	1177	1207	1102
										1470	17349	17379	17624	17533	16917	15757	16332	17068	15986	16356	11038	10186	10215	10349	10548	640	575	496	519	543	9854	10135	10161	10485	10316	8544	8989	8664	8516	8598	4343	4178	4261	4384	4481	1220	1180	1209	1105
										1471	17413	17445	17686	17599	16982	15814	16390	17134	16047	16413	11074	10223	10249	10385	10585	641	577	497	521	545	9888	10172	10198	10517	10349	8571	9020	8694	8544	8628	4354	4188	4272	4394	4494	1223	1183	1212	1108
										1472	17480	17510	17752	17667	17044	15867	16448	17190	16108	16469	11108	10259	10283	10420	10625	642	579	498	523	546	9919	10205	10232	10549	10384	8599	9047	8720	8573	8657	4367	4201	4284	4408	4507	1226	1186	1214	1112
										1473	17546	17576	17817	17735	17110	15924	16511	17252	16171	16533	11146	10296	10321	10458	10661	644	581	500	523	547	9950	10239	10267	10585	10423	8630	9076	8747	8598	8684	4379	4212	4297	4421	4521	1230	1189	1217	1115
										1474	17608	17646	17879	17799	17177	15984	16569	17314	16230	16590	11182	10328	10356	10496	10696	647	582	502	524	549	9983	10270	10306	10620	10455	8661	9107	8774	8628	8713	4391	4226	4309	4433	4533	1232	1193	1220	1119
										1475	17675	17712	17949	17870	17236	16045	16628	17375	16286	16654	11221	10364	10391	10532	10729	648	584	503	525	550	10019	10304	10339	10657	10491	8689	9136	8805	8657	8739	4404	4238	4322	4445	4545	1235	1196	1222	1122
										1476	17741	17783	18017	17939	17304	16101	16687	17438	16345	16719	11255	10397	10429	10567	10765	649	585	504	527	551	10051	10337	10378	10692	10524	8717	9165	8830	8686	8762	4416	4252	4333	4458	4560	1238	1199	1225	1124
										1477	17810	17851	18089	18006	17371	16159	16744	17499	16408	16780	11292	10431	10463	10604	10804	650	587	506	528	552	10083	10368	10409	10725	10555	8745	9191	8859	8712	8789	4427	4262	4347	4471	4572	1243	1202	1228	1126
										1478	17874	17916	18154	18071	17433	16220	16802	17556	16464	16838	11334	10467	10501	10642	10844	652	588	507	529	553	10117	10400	10440	10762	10591	8776	9222	8885	8738	8819	4441	4275	4359	4484	4587	1247	1206	1230	1129
										1479	17944	17985	18225	18141	17500	16274	16858	17616	16525	16901	11371	10502	10540	10677	10882	654	590	508	532	555	10152	10433	10478	10794	10626	8806	9250	8914	8766	8851	4455	4285	4371	4499	4599	1253	1208	1234	1133
										1480	18010	18049	18293	18208	17568	16333	16919	17680	16580	16960	11412	10537	10575	10716	10920	655	591	510	534	556	10187	10470	10512	10829	10660	8832	9281	8942	8794	8874	4467	4299	4383	4511	4613	1256	1213	1236	1136
										1481	18074	18115	18361	18276	17631	16390	16980	17745	16639	17022	11454	10573	10611	10751	10959	656	592	511	535	556	10220	10502	10546	10866	10694	8863	9312	8971	8825	8900	4478	4314	4397	4523	4627	1260	1216	1240	1140
										1482	18143	18187	18431	18341	17697	16444	17038	17810	16696	17082	11493	10609	10646	10789	10994	657	593	512	536	558	10252	10532	10581	10904	10729	8891	9346	8999	8856	8929	4494	4326	4410	4537	4640	1263	1219	1243	1142
										1483	18208	18252	18502	18405	17760	16501	17101	17875	16757	17147	11531	10646	10684	10826	11032	659	594	513	539	559	10287	10568	10619	10943	10766	8921	9373	9030	8887	8957	4507	4338	4421	4548	4655	1266	1221	1246	1146
										1484	18275	18319	18568	18471	17828	16553	17159	17934	16820	17208	11568	10686	10721	10863	11069	660	595	513	540	560	10320	10605	10655	10983	10801	8948	9403	9060	8918	8983	4519	4349	4434	4562	4667	1271	1224	1249	1149
										1485	18344	18384	18635	18537	17901	16613	17222	17995	16882	17274	11605	10718	10757	10896	11106	661	596	514	541	561	10354	10641	10695	11018	10837	8979	9434	9092	8949	9012	4532	4362	4447	4577	4683	1274	1228	1253	1151
										1486	18411	18455	18704	18607	17965	16675	17282	18058	16943	17334	11643	10755	10793	10935	11147	663	597	515	543	562	10389	10679	10730	11054	10867	9009	9463	9124	8977	9038	4545	4373	4462	4590	4696	1278	1232	1255	1154
										1487	18477	18523	18774	18676	18034	16737	17344	18124	17006	17397	11684	10788	10832	10975	11187	665	599	516	543	564	10423	10714	10767	11088	10904	9037	9491	9153	9007	9070	4556	4383	4472	4602	4707	1282	1235	1258	1156
										1488	18545	18596	18847	18751	18103	16798	17404	18186	17065	17464	11721	10825	10868	11011	11226	667	601	517	544	565	10457	10747	10804	11126	10941	9070	9519	9179	9035	9096	4568	4394	4484	4616	4719	1285	1239	1262	1159
										1489	18615	18665	18915	18820	18170	16858	17463	18256	17125	17527	11759	10861	10901	11053	11265	668	602	518	546	565	10492	10781	10839	11162	10972	9099	9549	9211	9061	9124	4584	4408	4497	4629	4733	1288	1242	1266	1161
										1490	18689	18733	18990	18884	18238	16919	17523	18323	17186	17590	11801	10896	10936	11093	11306	670	603	519	547	566	10529	10815	10872	11200	11010	9130	9582	9241	9093	9155	4598	4419	4510	4643	4745	1292	1246	1269	1165
										1491	18758	18796	19061	18956	18307	16980	17584	18389	17249	17653	11840	10933	10973	11129	11348	671	604	520	548	568	10563	10855	10906	11236	11045	9162	9611	9273	9123	9185	4611	4430	4522	4658	4759	1294	1249	1274	1168
										1492	18827	18869	19129	19021	18375	17044	17644	18459	17314	17716	11881	10969	11013	11169	11383	672	607	521	549	568	10596	10895	10941	11277	11081	9191	9642	9302	9153	9215	4626	4443	4533	4674	4773	1299	1253	1277	1171
										1493	18892	18937	19196	19095	18442	17101	17708	18520	17377	17785	11925	11008	11053	11207	11424	674	610	522	551	570	10632	10931	10977	11317	11119	9220	9676	9333	9182	9245	4638	4457	4544	4685	4787	1301	1258	1281	1172
										1494	18963	19014	19270	19167	18514	17163	17769	18589	17439	17848	11963	11046	11095	11244	11459	675	611	523	551	571	10670	10966	11016	11352	11158	9247	9707	9365	9213	9277	4653	4469	4556	4699	4801	1306	1261	1286	1175
										1495	19038	19089	19342	19236	18582	17223	17830	18655	17504	17914	12000	11080	11135	11284	11499	677	612	524	552	573	10708	11002	11052	11388	11194	9279	9740	9395	9247	9310	4665	4482	4569	4711	4814	1308	1264	1288	1178
										1496	19112	19160	19417	19311	18648	17286	17892	18725	17572	17973	12041	11122	11175	11318	11537	678	614	527	554	574	10745	11036	11091	11426	11232	9309	9772	9425	9276	9339	4678	4496	4584	4727	4827	1312	1268	1292	1182
										1497	19182	19232	19491	19384	18717	17343	17962	18792	17637	18036	12075	11159	11215	11354	11578	681	615	528	555	575	10781	11075	11131	11461	11271	9337	9806	9459	9307	9369	4691	4506	4598	4740	4841	1315	1271	1295	1184
										1498	19251	19302	19566	19452	18789	17417	18026	18862	17707	18102	12116	11196	11256	11395	11619	682	616	529	556	576	10822	11109	11167	11496	11304	9368	9838	9487	9336	9403	4705	4522	4614	4754	4854	1319	1274	1298	1188
										1499	#NAME?	19373	19643	19526	18860	17477	18088	18927	17766	18174	12157	11235	11293	11433	11659	684	617	530	557	577	10858	11148	11206	11532	11343	9397	9869	9517	9365	9431	4716	4536	4628	4768	4868	1322	1277	1301	1190
[truncated: 6 more columns]

## Sheet: Average Differences
	Control			MNNG1			MNNG3			MNNG7			p53Si			p53 RNAi-MNNG1			p53 RNAi-MNNG3			p53 RNAi-MNNG7
Time min x10	Single-cell tracking	Simulation	Fold	Single-cell tracking	Simulation	Fold	Single-cell tracking	Simulation	Fold	Single-cell tracking	Simulation	Fold	Single-cell tracking	Simulation	Fold	Single-cell tracking	Simulation	Fold	Single-cell tracking	Simulation	Fold	Single-cell tracking	Simulation	Fold
0	100	100	100	100	100	100	100	100	100	100	100	100	100	100	100	100	100	100	100	100	100	100	100	100
1	100	100	100	100	100	100	100	100	100	100	100	100	100	100	100	100	100	100	100	100	100	100	100	100
2	100	100	100	100	100	100	100	100	100	100	100	100	100	100	100	100	100	100	100	100	100	100	100	100
3	101	100	101	100	100	100	101	100	101	100	100	100	100	100	100	100	100	100	101	100	101	100	100	100
4	101	100	101	100	100	100	101	100	101	100	100	100	100	99.8	100.2	101	100	101	101	99.8	101.202	100	99.6	100.402
5	101	100.2	100.798	100	100	100	101	100.4	100.598	100	100	100	100	100	100	101	100	101	102	100.6	101.392	100	99.8	100.2
6	101	100.8	100.198	101	100.6	100.398	102	100.4	101.594	100	100	100	101	100.2	100.798	102	100.8	101.19	102	100.6	101.392	100	99.8	100.2
7	101	100.8	100.198	101	100.6	100.398	102	101.2	100.791	100	100	100	102	100.8	101.19	102	100.8	101.19	102	101.4	100.592	101	99.8	101.202
8	102	100.8	101.19	101	100.8	100.198	102	102	100	100	100	100	102	101.2	100.791	102	101.2	100.791	102	101.4	100.592	101	99.8	101.202
9	102	101.8	100.196	101	101	100	102	102	100	101	100	101	102	102.2	99.8043	102	101.2	100.791	102	101.4	100.592	101	100	101
10	102	102	100	101	101	100	103	102	100.98	101	100	101	102	102.2	99.8043	102	101.2	100.791	103	101.4	101.578	101	100	101
11	102	102.4	99.6094	102	101	100.99	103	102	100.98	101	100	101	102	102.2	99.8043	102	101.2	100.791	103	101.8	101.179	101	100	101
12	103	103	100	102	101	100.99	103	102.4	100.586	101	100	101	102	102.4	99.6094	102	101.6	100.394	103	102	100.98	101	100	101
13	103	103	100	103	101.4	101.578	104	102.8	101.167	100	100	100	102	102.6	99.4152	102	101.6	100.394	103	102	100.98	101	100	101
14	103	103	100	103	101.6	101.378	104	103	100.971	100	100	100	103	103	100	103	101.8	101.179	103	102.2	100.783	101	100	101
15	103	103	100	104	102.4	101.562	104	103	100.971	100	100	100	103	103	100	103	101.8	101.179	104	102.6	101.365	101	100	101
16	103	103	100	103	102.4	100.586	104	103	100.971	100	100	100	103	103.2	99.8062	103	102	100.98	105	102.4	102.539	101	100	101
17	103	103	100	104	103	100.971	104	103	100.971	100	100	100	103	103.2	99.8062	103	102	100.98	106	103.2	102.713	101	100	101
18	104	103	100.971	105	104.2	100.768	105	103.6	101.351	100	100	100	103	104	99.0385	104	102	101.961	106	103.4	102.515	101	100	101
19	104	103.6	100.386	105	104.8	100.191	105	103.6	101.351	101	100	101	103	104.2	98.8484	104	102.6	101.365	107	104.4	102.49	101	100	101
20	105	104	100.962	105	105.6	99.4318	105	104	100.962	101	100	101	104	104.2	99.8081	104	102.8	101.167	107	104.6	102.294	101	100	101
21	106	104.6	101.338	105	105.6	99.4318	105	104	100.962	101	99.8	101.202	104	104.2	99.8081	104	102.8	101.167	107	104.8	102.099	101	100	101
22	106	104.8	101.145	105	105.8	99.2439	106	104.2	101.727	101	100	101	105	104.6	100.382	104	102.8	101.167	107	104.8	102.099	102	100	102
23	106	105.4	100.569	105	105.8	99.2439	106	104.2	101.727	101	100	101	105	105.2	99.8099	104	102.8	101.167	107	104.8	102.099	102	100	102
24	107	105.4	101.518	105	106	99.0566	106	105	100.952	101	100	101	105	105.6	99.4318	105	103	101.942	107	105	101.905	103	100	103
25	107	105.4	101.518	105	106	99.0566	106	105	100.952	102	100	102	105	105.8	99.2439	105	103	101.942	107	105	101.905	103	100.2	102.794
26	107	106.2	100.753	106	106.2	99.8117	106	105	100.952	102	100	102	105	105.8	99.2439	105	103.2	101.744	107	105	101.905	103	100	103
27	107	106.2	100.753	106	106.2	99.8117	107	105.2	101.711	102	100	102	105	106.2	98.8701	105	103.4	101.547	107	105	101.905	102	100.6	101.392
28	107	106.8	100.187	106	106.8	99.2509	107	105.4	101.518	102	100	102	106	106.6	99.4371	105	103.4	101.547	107	105	101.905	102	100.8	101.19
29	107	106.8	100.187	106	107	99.0654	107	105.6	101.326	102	100	102	106	106.6	99.4371	105	103.8	101.156	107	105	101.905	102	100.8	101.19
30	107	106.8	100.187	107	107	100	107	105.6	101.326	102	100	102	106	107.2	98.8806	106	104	101.923	108	105.2	102.662	102	101.2	100.791
31	108	106.8	101.124	107	107	100	107	105.6	101.326	102	100	102	106	107.2	98.8806	106	104	101.923	108	105	102.857	102	101.2	100.791
32	108	106.8	101.124	107	107	100	107	105.6	101.326	102	100	102	107	107.2	99.8134	106	104.2	101.727	108	105.4	102.467	102	101.2	100.791
33	108	107.2	100.746	107	107.4	99.6276	107	105.6	101.326	103	100	103	107	107.2	99.8134	107	104.2	102.687	108	105.2	102.662	102	101.2	100.791
34	108	107.2	100.746	107	108	99.0741	107	105.8	101.134	103	100	103	107	107.4	99.6276	107	104.4	102.49	108	105.2	102.662	102	101.2	100.791
35	108	107.2	100.746	107	108	99.0741	108	105.8	102.079	103	100	103	107	107.4	99.6276	107	104.6	102.294	109	106	102.83	102	101.2	100.791
36	109	107.2	101.679	107	108	99.0741	108	106	101.887	103	100	103	107	107.4	99.6276	107	104.6	102.294	109	106	102.83	103	101.2	101.779
37	110	107.4	102.421	108	108	100	108	106.2	101.695	103	100	103	107	107.4	99.6276	107	104.6	102.294	109	106	102.83	103	101.2	101.779
38	110	108.4	101.476	108	108	100	108	107	100.935	103	100	103	108	107.4	100.559	108	105	102.857	110	106	103.774	103	101.2	101.779
39	110	109	100.917	108	108.4	99.631	108	107	100.935	104	100	104	108	107.8	100.186	109	104.8	104.008	110	106	103.774	103	101.2	101.779
40	111	109.2	101.648	108	108.4	99.631	109	107	101.869	104	100	104	108	108.2	99.8152	109	105.8	103.025	111	106.2	104.52	103	101.4	101.578
41	111	109.6	101.277	108	108.6	99.4475	109	107	101.869	104	100	104	108	108.8	99.2647	110	106.6	103.189	111	106.6	104.128	103	101.4	101.578
42	111	109.6	101.277	108	108.6	99.4475	110	107.6	102.23	104	100	104	109	108.8	100.184	110	106.8	102.996	111	107.4	103.352	103	101.4	101.578
43	111	109.6	101.277	108	108.6	99.4475	110	107.6	102.23	104	100	104	109	108.8	100.184	110	107	102.804	111	107.4	103.352	103	101.4	101.578
44	111	110	100.909	109	109	100	111	108.2	102.588	104	100	104	109	109.2	99.8168	111	107.6	103.16	111	107.6	103.16	103	101.4	101.578
45	112	110.4	101.449	109	109	100	111	108.4	102.399	104	100	104	109	109.6	99.4526	111	107.6	103.16	111	107.8	102.968	103	101.4	101.578
46	113	110.8	101.986	109	109.8	99.2714	111	109.2	101.648	104	100	104	109	109.6	99.4526	111	107.8	102.968	112	107.6	104.089	103	101.2	101.779
47	113	111.2	101.619	109	109.8	99.2714	111	109.2	101.648	104	100	104	109	109.6	99.4526	111	108	102.778	112	107.6	104.089	103	101.2	101.779
48	114	111.4	102.334	109	109.8	99.2714	111	109.2	101.648	104	100	104	109	110.2	98.9111	111	108.6	102.21	112	107.8	103.896	103	101.4	101.578
49	114	112	101.786	110	109.8	100.182	111	109.2	101.648	104	100	104	111	110.2	100.726	112	108.6	103.131	112	107.8	103.896	103	101.4	101.578
50	114	112.6	101.243	110	110	100	112	109.4	102.377	104	100	104	111	110.2	100.726	112	108.6	103.131	113	107.8	104.824	103	101.4	101.578
51	115	113.2	101.59	110	110.2	99.8185	112	109.4	102.377	104	100	104	111	111	100	112	109.2	102.564	113	107.8	104.824	103	101.4	101.578
52	115	113.2	101.59	111	110.2	100.726	112	109.6	102.19	104	100	104	112	111	100.901	112	110	101.818	113	108.2	104.436	103	101.4	101.578
53	116	113.2	102.473	111	110.6	100.362	112	110	101.818	104	100	104	112	111.6	100.358	112	109.8	102.004	114	108.6	104.972	104	101.4	102.564
54	116	113.8	101.933	112	110.8	101.083	113	110	102.727	104	100	104	112	112	100	113	109.8	102.914	114	108.6	104.972	104	101.4	102.564
55	116	114	101.754	112	111.8	100.179	113	110.2	102.541	104	100	104	113	112.2	100.713	114	109.8	103.825	114	108.8	104.779	104	101.4	102.564
56	117	114.6	102.094	112	112.2	99.8217	113	110.6	102.17	104	100	104	113	112.4	100.534	114	110	103.636	114	108.8	104.779	104	101.4	102.564
57	117	114.6	102.094	112	112.2	99.8217	113	110.8	101.986	104	100	104	114	112.8	101.064	115	111	103.604	114	108.8	104.779	104	101.4	102.564
58	117	115.2	101.562	113	112.2	100.713	113	110.8	101.986	104	100	104	115	113.2	101.59	115	111.6	103.047	114	109	104.587	104	101.4	102.564
59	118	115.2	102.431	113	112.2	100.713	113	111	101.802	104	100	104	115	113.6	101.232	115	112	102.679	114	109	104.587	104	101.4	102.564
60	118	115.4	102.253	113	112.6	100.355	114	111	102.703	104	100	104	115	114.4	100.524	116	112.6	103.02	114	109	104.587	104	101.4	102.564
61	118	115.6	102.076	114	112.6	101.243	114	111	102.703	104	100	104	116	114.6	101.222	118	112.6	104.796	115	109	105.505	104	101.4	102.564
62	119	115.6	102.941	114	112.6	101.243	114	111	102.703	104	100	104	117	114.8	101.916	118	113.6	103.873	115	109	105.505	104	101.4	102.564
63	119	116	102.586	115	113.8	101.054	114	111	102.703	104	100	104	117	115.6	101.211	118	114.6	102.967	115	109.4	105.119	104	101.4	102.564
64	120	116.4	103.093	116	114	101.754	114	111	102.703	104	100	104	117	115.8	101.036	119	114.8	103.659	115	109.6	104.927	104	101.4	102.564
65	120	116.6	102.916	116	115	100.87	114	111	102.703	104	100	104	118	115.8	101.9	119	115.4	103.12	115	109.6	104.927	105	101.4	103.55
66	120	117	102.564	117	115.8	101.036	114	111	102.703	104	100	104	119	116.4	102.234	119	115.8	102.763	116	109.6	105.839	105	101.4	103.55
67	121	117	103.419	117	116	100.862	114	111	102.703	104	100	104	119	116.4	102.234	120	116.8	102.74	116	110	105.455	105	101.6	103.346
68	122	117.8	103.565	117	116.4	100.515	114	111.4	102.334	104	100	104	119	117.4	101.363	120	116.8	102.74	117	110.2	106.171	105	101.6	103.346
69	122	118.4	103.041	117	116.8	100.171	114	111.8	101.968	104	100	104	120	117.4	102.215	121	117	103.419	117	110.4	105.978	105	101.6	103.346
70	122	119.4	102.178	118	116.8	101.027	114	111.8	101.968	105	100	105	120	117.4	102.215	122	117	104.274	117	110.8	105.596	105	101.6	103.346
71	122	119.4	102.178	118	117	100.855	114	111.8	101.968	105	100	105	120	117.6	102.041	122	118	103.39	117	111	105.405	105	101.6	103.346
72	123	119.4	103.015	118	117.4	100.511	115	111.8	102.862	105	100	105	121	118	102.542	122	118.6	102.867	118	111.2	106.115	105	101.6	103.346
73	124	119.4	103.853	118	117.4	100.511	115	111.8	102.862	105	100	105	121	118	102.542	123	119.6	102.843	118	111.2	106.115	105	101.6	103.346
74	124	120	103.333	119	117.8	101.019	115	112	102.679	105	100	105	122	118.4	103.041	123	119.6	102.843	118	111.6	105.735	105	101.6	103.346
75	124	120.6	102.819	120	118	101.695	115	112	102.679	105	100	105	122	118.8	102.694	124	119.6	103.679	118	111.6	105.735	105	101.6	103.346
76	125	121	103.306	121	118.6	102.024	116	112	103.571	105	100	105	122	119	102.521	124	119.6	103.679	119	111.6	106.631	105	101.6	103.346
77	125	121	103.306	121	119.6	101.171	116	112.6	103.02	105	100	105	122	119.8	101.836	125	119.8	104.341	119	112	106.25	105	101.6	103.346
78	125	121.2	103.135	121	120.2	100.666	117	112.8	103.723	105	100	105	123	119.6	102.843	125	120.8	103.477	119	112.2	106.061	105	101.6	103.346
79	125	121.2	103.135	121	120.2	100.666	117	112.8	103.723	105	100	105	123	120	102.5	126	121.4	103.789	119	112.2	106.061	105	101.6	103.346
80	125	121.2	103.135	121	120.4	100.498	117	113.8	102.812	105	100	105	122	120	101.667	127	122	104.098	119	112.4	105.872	105	101.6	103.346
81	125	121.2	103.135	122	120.6	101.161	118	114	103.509	105	100	105	122	120	101.667	128	122.6	104.405	119	112.4	105.872	105	101.6	103.346
82	125	121.4	102.965	122	120.6	101.161	119	114.2	104.203	105	100	105	123	120.4	102.159	128	122.8	104.235	119	113	105.31	105	101.6	103.346
83	126	122	103.279	123	121	101.653	119	114.6	103.839	105	100	105	123	120.8	101.821	128	124	103.226	119	113	105.31	105	101.6	103.346
84	126	122	103.279	123	121.4	101.318	119	115.4	103.12	105	100	105	123	120.8	101.821	128	124	103.226	119	113	105.31	106	101.6	104.331
85	126	122.4	102.941	124	122	101.639	120	115.8	103.627	105	100	105	124	121	102.479	129	124	104.032	120	113	106.195	105	101.4	103.55
86	126	122.6	102.773	124	122.2	101.473	120	115.8	103.627	105	100	105	124	122	101.639	129	124	104.032	120	113.2	106.007	105	101.4	103.55
87	127	122.8	103.42	125	122.6	101.958	120	116.4	103.093	105	100	105	125	122	102.459	129	124.4	103.698	120	113.4	105.82	105	101.8	103.143
88	128	122.8	104.235	125	123.2	101.461	120	116.4	103.093	105	100	105	125	122	102.459	129	124.4	103.698	120	113.4	105.82	105	101.8	103.143
89	128	123.2	103.896	125	123.6	101.133	120	116.4	103.093	105	100	105	126	122.2	103.11	130	124.6	104.334	120	113.4	105.82	105	101.8	103.143
90	128	123.8	103.393	126	124.4	101.286	121	116.4	103.952	105	100	105	126	123.2	102.273	130	124.8	104.167	120	113.8	105.448	105	101.8	103.143
91	128	123.8	103.393	126	124.6	101.124	121	117	103.419	105	100	105	126	123.4	102.107	131	124.8	104.968	120	114.4	104.895	105	101.8	103.143
92	128	123.8	103.393	127	124.8	101.763	121	117.2	103.242	105	100	105	127	123.6	102.751	131	124.8	104.968	120	114.4	104.895	105	101.8	103.143
93	128	124.6	102.729	128	124.8	102.564	121	117.2	103.242	105	100	105	127	124.2	102.254	132	126.2	104.596	120	114.4	104.895	105	101.8	103.143
94	128	124.6	102.729	128	125.6	101.911	121	117.2	103.242	105	100	105	127	124.4	102.09	132	126.6	104.265	120	114.6	104.712	105	101.8	103.143
95	129	125.4	102.871	128	126	101.587	121	117.6	102.891	105	100	105	127	124.4	102.09	132	126.8	104.101	120	114.6	104.712	105	101.8	103.143
96	129	125.6	102.707	129	126.6	101.896	121	117.8	102.716	105	100	105	127	124.6	101.926	133	127.2	104.56	120	114.6	104.712	105	102	102.941
97	130	125.8	103.339	131	127	103.15	122	117.8	103.565	105	100	105	128	125.2	102.236	133	127.6	104.232	120	114.4	104.895	106	102.2	103.718
98	130	126.2	103.011	131	127.8	102.504	122	118	103.39	105	100	105	128	125.4	102.073	134	128	104.688	120	114.8	104.53	106	102.2	103.718
99	131	126.6	103.476	132	128.8	102.484	122	118.4	103.041	105	100	105	128	126	101.587	134	128	104.688	120	114.8	104.53	106	102.2	103.718
100	131	127	103.15	132	129.2	102.167	122	118.4	103.041	105	100	105	128	126.8	100.946	134	128.6	104.199	120	114.8	104.53	106	102.2	103.718
101	131	127.2	102.987	133	129.6	102.623	123	118.8	103.535	105	100	105	128	126.8	100.946	135	128.6	104.977	121	115.4	104.853	106	102.2	103.718
102	131	127.2	102.987	133	129.8	102.465	123	118.8	103.535	105	100	105	129	127	101.575	136	129	105.426	121	115.4	104.853	106	102.2	103.718
103	131	128	102.344	133	130	102.308	123	119.4	103.015	105	100	105	130	127.8	101.721	136	129	105.426	121	115.4	104.853	105	102.2	102.74
104	132	128	103.125	134	130.4	102.761	124	119.6	103.679	105	100	105	130	128	101.562	137	129.8	105.547	121	115.4	104.853	106	102	103.922
105	132	128.6	102.644	135	130.4	103.528	124	119.6	103.679	105	100	105	131	128.6	101.866	137	130	105.385	121	115.8	104.491	106	102.6	103.314
106	133	129.2	102.941	135	131.4	102.74	124	120	103.333	105	100	105	131	128.8	101.708	137	130.2	105.223	121	115.8	104.491	106	102.6	103.314
107	134	129.2	103.715	136	132.4	102.719	125	120	104.167	105	100	105	131	129.4	101.236	138	130.6	105.666	121	115.8	104.491	106	102.6	103.314
108	134	129.8	103.236	137	132.4	103.474	126	120	105	105	100	105	132	129.6	101.852	138	130.4	105.828	121	115.6	104.671	106	102.4	103.516
109	134	130.4	102.761	137	133.2	102.853	126	121.6	103.618	105	100	105	132	129.6	101.852	138	131	105.344	121	115.8	104.491	106	102.6	103.314
110	134	130.4	102.761	139	133.2	104.354	126	121.8	103.448	105	100	105	133	130.2	102.151	138	131.2	105.183	122	115.6	105.536	107	102.6	104.288
111	134	130.4	102.761	139	133.6	104.042	126	122.6	102.773	105	100	105	133	130.6	101.838	138	131.2	105.183	122	115.6	105.536	107	102.6	104.288
112	134	130.4	102.761	140	135.2	103.55	127	122.6	103.589	105	100	105	134	131	102.29	139	131.2	105.945	122	115.8	105.354	107	102.6	104.288
113	134	130.4	102.761	140	135.6	103.245	127	122.6	103.589	105	100	105	134	131.2	102.134	140	131.2	106.707	122	116.6	104.631	107	102.6	104.288
114	134	130.4	102.761	140	136	102.941	127	122.6	103.589	105	100	105	135	132	102.273	140	131.6	106.383	122	116.4	104.811	107	102.4	104.492
115	135	131	103.053	141	136.6	103.221	127	122.6	103.589	105	100	105	135	132	102.273	140	131.8	106.222	122	116.4	104.811	107	102.4	104.492
116	135	131	103.053	141	137	102.92	127	122.6	103.589	105	100	105	136	132.6	102.564	141	132.2	106.657	122	116.4	104.811	107	102.4	104.492
117	136	131.4	103.501	142	137.4	103.348	128	122.6	104.405	105	100	105	137	133.2	102.853	142	132	107.576	122	116.4	104.811	107	102.4	104.492
118	137	131.2	104.421	142	137.4	103.348	128	123.2	103.896	105	100	105	137	134	102.239	142	132.4	107.251	122	116.8	104.452	108	102.4	105.469
119	138	132.6	104.072	142	138.2	102.75	128	123.6	103.56	105	100	105	137	134.8	101.632	142	132.8	106.928	123	117.6	104.592	108	102.4	105.469
120	139	132.8	104.669	143	138.6	103.175	128	124	103.226	105	100	105	137	135.4	101.182	142	133	106.767	123	117.8	104.414	108	102.4	105.469
121	139	134.4	103.423	144	139.2	103.448	129	124	104.032	105	100	105	139	136	102.206	142	133	106.767	123	118	104.237	108	102.4	105.469
122	140	134.6	104.012	145	139.6	103.868	129	124.2	103.865	106	100	106	139	135.8	102.356	142	133	106.767	124	118	105.085	108	102.4	105.469
123	140	135	103.704	146	140.2	104.137	129	124.6	103.531	106	100	106	140	136.6	102.489	143	133.2	107.357	124	118.6	104.553	108	102.4	105.469
124	141	135.2	104.29	148	141.2	104.816	130	124.6	104.334	106	100	106	140	136.4	102.639	143	133.6	107.036	124	118.8	104.377	108	102.4	105.469
125	141	135.6	103.982	149	142	104.93	130	124.8	104.167	106	100	106	140	137.6	101.744	144	133.6	107.784	124	118.8	104.377	108	102.4	105.469
126	142	136.2	104.258	149	143.8	103.616	130	125.2	103.834	106	100	106	140	138.2	101.302	145	133.8	108.371	125	118.8	105.219	108	102.4	105.469
127	142	136.6	103.953	150	144	104.167	131	125.2	104.633	105	100	105	141	138.2	102.026	145	134.4	107.887	125	118.8	105.219	108	102.6	105.263
128	143	137.2	104.227	151	144	104.861	131	125.4	104.466	106	99.8	106.212	141	139.2	101.293	146	135.6	107.67	125	119.4	104.69	108	102.6	105.263
129	144	137.4	104.803	151	144.6	104.426	131	125.6	104.299	106	100	106	142	139.6	101.719	146	135.6	107.67	125	119.4	104.69	108	102.6	105.263
130	145	138.2	104.92	152	145.4	104.539	131	125.6	104.299	106	100.2	105.788	142	140.2	101.284	147	136.2	107.93	125	119.4	104.69	108	102.6	105.263
131	146	138.4	105.491	154	146.6	105.048	131	126	103.968	106	100.2	105.788	142	140.4	101.14	147	136.8	107.456	125	119.4	104.69	108	102.6	105.263
132	147	139.4	105.452	155	147	105.442	131	126.4	103.639	106	100.2	105.788	143	140.8	101.562	147	137.8	106.676	125	119.6	104.515	108	102.6	105.263
133	148	140.2	105.563	156	148.8	104.839	132	126.4	104.43	106	100.2	105.788	144	141.6	101.695	147	137.6	106.831	126	119.6	105.351	108	102.6	105.263
134	148	141	104.965	156	150.2	103.862	132	126.4	104.43	106	100.2	105.788	145	141.8	102.257	148	137.6	107.558	126	119.6	105.351	109	102.6	106.238
135	149	141.8	105.078	157	150.8	104.111	132	127	103.937	106	100.2	105.788	146	142.4	102.528	148	138	107.246	128	119.8	106.845	109	102.6	106.238
136	149	142	104.93	157	151	103.974	133	127	104.724	106	100.2	105.788	146	143.2	101.955	149	139	107.194	128	120	106.667	109	102.6	106.238
137	149	142.4	104.635	158	151.6	104.222	133	127	104.724	106	100.2	105.788	146	143.6	101.671	149	139	107.194	128	120.8	105.96	108	102.6	105.263
138	150	142.4	105.337	158	152	103.947	134	127.4	105.181	106	100.2	105.788	147	144.4	101.801	149	139.6	106.734	128	120.8	105.96	108	102.6	105.263
139	150	142.8	105.042	160	152.6	104.849	134	127.8	104.851	106	100.2	105.788	147	145	101.379	149	139.6	106.734	128	120.8	105.96	109	102.8	106.031
140	151	143	105.594	160	153	104.575	135	128	105.469	106	100.2	105.788	148	145	102.069	150	139.6	107.45	128	120.8	105.96	109	102.8	106.031
141	151	143.2	105.447	162	153.8	105.332	135	128.2	105.304	106	100.2	105.788	148	145	102.069	150	139.8	107.296	129	120.8	106.788	109	102.8	106.031
142	152	143.8	105.702	163	154.6	105.433	135	128.8	104.814	106	100.2	105.788	148	146	101.37	150	140.2	106.99	129	120.8	106.788	109	102.8	106.031
143	152	144	105.556	163	156.2	104.353	136	129.4	105.1	106	100.2	105.788	149	146.2	101.915	150	140.2	106.99	129	121.4	106.26	109	102.8	106.031
144	153	144.4	105.956	164	157	104.459	136	129.4	105.1	106	100.2	105.788	150	146.8	102.18	150	140.2	106.99	129	121.2	106.436	109	102.8	106.031
145	153	144.6	105.809	165	157.2	104.962	137	129.8	105.547	106	100.2	105.788	150	147.6	101.626	150	140.2	106.99	129	121.2	106.436	109	102.8	106.031
146	153	144.8	105.663	165	158.4	104.167	137	130	105.385	106	100.2	105.788	151	147.8	102.165	150	141.6	105.932	129	121.2	106.436	110	102.8	107.004
147	154	145	106.207	166	158.4	104.798	137	130.6	104.9	106	100.2	105.788	151	147.8	102.165	151	142	106.338	130	121.2	107.261	110	102.8	107.004
148	154	145	106.207	167	158.4	105.429	139	130.8	106.269	106	100.2	105.788	152	148.8	102.151	151	142.2	106.188	130	121.6	106.908	110	102.8	107.004
149	154	145.2	106.061	167	160	104.375	139	131.4	105.784	106	100.2	105.788	153	149.4	102.41	151	142.2	106.188	130	121.8	106.732	110	102.8	107.004
150	155	145.4	106.602	167	160.6	103.985	140	132.4	105.74	106	100.2	105.788	154	150.2	102.53	152	143.2	106.145	131	122.2	107.201	110	102.8	107.004
151	155	145.8	106.31	168	161.2	104.218	140	132.4	105.74	106	100.2	105.788	155	151.2	102.513	153	143.4	106.695	131	123.2	106.331	111	102.8	107.977
152	157	146.2	107.387	168	161.2	104.218	141	133.2	105.856	106	100.2	105.788	155	151.6	102.243	153	143.6	106.546	131	123.4	106.159	111	102.8	107.977
153	157	146.4	107.24	168	161.2	104.218	142	134.4	105.655	106	100.2	105.788	156	152.4	102.362	154	144.2	106.796	132	123.4	106.969	111	103	107.767
154	159	147.6	107.724	169	162.2	104.192	142	135.2	105.03	106	100.2	105.788	156	152.6	102.228	155	144.6	107.192	132	123.6	106.796	111	103	107.767
155	160	148	108.108	170	162.2	104.809	143	135.2	105.769	106	100.2	105.788	156	153.2	101.828	155	145.4	106.602	133	124	107.258	111	103	107.767
156	160	149	107.383	171	162.6	105.166	144	136.4	105.572	106	100.2	105.788	157	153.4	102.347	155	146	106.164	134	124.4	107.717	111	103	107.767
157	160	149.8	106.809	171	163.4	104.651	145	136.4	106.305	106	100.2	105.788	157	153.4	102.347	155	146.4	105.874	135	124.4	108.521	111	103.2	107.558
158	161	149.8	107.477	171	164	104.268	146	137.6	106.105	106	100.2	105.788	156	154.2	101.167	156	146.4	106.557	135	125.2	107.827	111	103.2	107.558
159	162	150.2	107.856	171	164	104.268	146	138.6	105.339	106	100.2	105.788	157	154.8	101.421	157	146.6	107.094	136	125.8	108.108	111	103.2	107.558
160	164	150.4	109.043	171	164	104.268	147	139.2	105.603	106	100.2	105.788	157	154.8	101.421	157	147	106.803	136	126.4	107.595	111	103.2	107.558
161	164	151.4	108.322	172	164	104.878	148	139.6	106.017	106	100.2	105.788	157	155.6	100.9	157	147.8	106.225	136	126.8	107.256	111	103.2	107.558
162	164	152.6	107.471	174	164	106.098	148	140.4	105.413	106	100.2	105.788	158	156	101.282	157	148.2	105.938	136	126.8	107.256	111	103.2	107.558
163	164	153.4	106.91	174	165	105.455	148	140.6	105.263	106	100.2	105.788	159	156.2	101.793	158	148.6	106.326	136	126.8	107.256	111	103.2	107.558
164	164	153.4	106.91	175	166.2	105.295	150	140.6	106.686	106	100.2	105.788	159	156.4	101.662	158	148.6	106.326	136	127.6	106.583	111	103.2	107.558
165	165	153.8	107.282	175	166.2	105.295	150	141	106.383	106	100.2	105.788	160	156.6	102.171	158	149	106.04	137	127.8	107.199	111	103.2	107.558
166	167	153.8	108.583	175	167.6	104.415	151	142.4	106.039	106	100.2	105.788	160	156.8	102.041	159	149	106.711	137	127.8	107.199	111	103.4	107.35
167	167	153.8	108.583	176	167.6	105.012	152	143	106.294	106	100.2	105.788	162	157	103.185	160	149	107.383	137	128.6	106.532	112	103.4	108.317
168	167	154.8	107.881	176	167.6	105.012	152	143.2	106.145	106	100.2	105.788	162	157.6	102.792	160	149.4	107.095	138	128.6	107.309	112	103.4	108.317
169	168	155.6	107.969	177	168	105.357	153	144.2	106.103	106	100.2	105.788	162	158.4	102.273	160	150.2	106.525	139	128.4	108.255	112	103.4	108.317
170	169	155.6	108.612	178	168.2	105.826	154	144.6	106.501	106	100.2	105.788	163	159.2	102.387	161	150.2	107.19	139	129.4	107.419	112	103.4	108.317
171	169	155.6	108.612	178	168.8	105.45	154	144.8	106.354	106	100.2	105.788	164	159.4	102.886	160	150.2	106.525	139	130	106.923	112	103.2	108.527
172	169	156.6	107.918	180	169.6	106.132	155	145.4	106.602	106	100.2	105.788	165	159.4	103.513	160	150.8	106.101	139	130.4	106.595	112	103.2	108.527
173	169	156.6	107.918	180	169.6	106.132	156	146	106.849	106	100.2	105.788	165	160.8	102.612	161	150.8	106.764	139	130.6	106.432	112	103.6	108.108
174	169	157	107.643	181	171	105.848	157	146	107.534	106	100.2	105.788	165	161.8	101.978	161	150.6	106.906	140	130.6	107.198	112	103.6	108.108
175	170	157.4	108.005	181	171.4	105.601	158	147	107.483	106	100.2	105.788	165	161.6	102.104	161	151.2	106.481	140	130.6	107.198	112	103.6	108.108
176	171	157.6	108.503	182	171.8	105.937	158	148	106.757	106	100.2	105.788	166	162.2	102.343	162	151.8	106.719	141	130.6	107.963	112	103.6	108.108
177	171	157.8	108.365	182	172	105.814	158	148.6	106.326	106	100.2	105.788	168	162.2	103.576	162	151.8	106.719	142	130.8	108.563	112	103.6	108.108
178	171	158.6	107.818	182	172.4	105.568	160	148.8	107.527	106	100.2	105.788	168	163.2	102.941	162	152.8	106.021	142	131.8	107.739	112	103.6	108.108
179	171	159.4	107.277	182	173.4	104.96	160	148.8	107.527	106	100.2	105.788	169	164	103.049	163	152.6	106.815	142	132.2	107.413	112	103.6	108.108
180	172	159.6	107.769	182	173.6	104.839	160	150.2	106.525	106	100.2	105.788	169	164	103.049	164	152.8	107.33	142	132.4	107.251	113	103.6	109.073
181	173	160.4	107.855	183	173.8	105.293	160	150.8	106.101	106	100.2	105.788	170	164.8	103.155	164	153.2	107.05	142	132.4	107.251	113	103.6	109.073
182	174	161	108.075	184	174	105.747	161	150.8	106.764	106	100.2	105.788	171	165.8	103.136	165	153.8	107.282	144	132.4	108.761	113	103.6	109.073
183	174	162.4	107.143	184	175.2	105.023	161	151	106.623	106	100.2	105.788	171	165.8	103.136	165	153.8	107.282	144	133.2	108.108	113	103.6	109.073
184	175	162.8	107.494	185	175.2	105.594	162	151.6	106.86	106	100.2	105.788	171	166.6	102.641	165	154.4	106.865	145	134	108.209	113	103.6	109.073
185	176	163.4	107.711	185	175.4	105.473	163	151.8	107.378	106	100.2	105.788	171	167	102.395	165	154.8	106.589	145	134.2	108.048	113	103.6	109.073
186	177	164	107.927	185	175.8	105.233	163	152.8	106.675	106	100.2	105.788	171	167.4	102.151	166	155.2	106.959	145	134.6	107.727	113	103.4	109.284
187	177	164.8	107.403	186	176	105.682	163	153.4	106.258	106	100.2	105.788	172	167.4	102.748	166	155.6	106.684	146	135	108.148	113	103.4	109.284
188	178	164.8	108.01	187	176.6	105.889	164	153.8	106.632	106	100.2	105.788	172	167.4	102.748	167	156	107.051	146	135.6	107.67	113	103.4	109.284
189	178	165.6	107.488	187	177.6	105.293	164	154	106.494	106	100.2	105.788	173	167.6	103.222	168	156.6	107.28	147	135.6	108.407	113	103.4	109.284
190	179	166.6	107.443	188	178.2	105.499	164	154.8	105.943	106	100.2	105.788	173	167.8	103.099	168	157.2	106.87	148	136	108.824	113	103.6	109.073
191	179	166.8	107.314	188	178.6	105.263	165	155.4	106.178	106	100.2	105.788	173	167.8	103.099	169	158	106.962	148	137	108.029	113	103.6	109.073
192	179	167.2	107.057	188	179.2	104.911	166	155.4	106.821	107	100.2	106.786	173	168.2	102.854	169	158.2	106.827	148	137.4	107.715	113	103.6	109.073
193	180	167.8	107.271	188	179.6	104.677	167	155.8	107.189	107	100.2	106.786	174	168.2	103.448	169	158.4	106.692	148	137.6	107.558	113	103.6	109.073
194	180	168	107.143	190	179.8	105.673	167	157	106.369	107	100.2	106.786	174	168.2	103.448	169	159	106.289	148	137.8	107.402	113	103.6	109.073
195	181	168.4	107.482	190	180.2	105.438	167	157.6	105.964	107	100.2	106.786	174	168.8	103.081	168	159.6	105.263	149	137.8	108.128	113	103.6	109.073
196	181	169.4	106.848	191	180.8	105.642	168	158	106.329	107	100.2	106.786	174	169	102.959	168	160	105	150	138	108.696	113	103.6	109.073
197	182	170.2	106.933	191	181.4	105.292	168	158	106.329	107	100.2	106.786	175	169.4	103.306	169	160	105.625	151	138.2	109.262	113	103.6	109.073
198	182	170.4	106.808	191	181.6	105.176	168	158.4	106.061	107	100.2	106.786	175	169.8	103.062	170	160	106.25	151	138.8	108.79	114	103.6	110.039
199	182	171.2	106.308	191	182.4	104.715	168	158.6	105.927	107	100.2	106.786	175	170	102.941	170	160.8	105.721	151	139.8	108.011	114	103.8	109.827
200	183	171.8	106.519	192	182.8	105.033	169	158.6	106.557	107	100.2	106.786	174	170.6	101.993	171	161	106.211	153	140	109.286	114	103.8	109.827
201	184	172.2	106.852	192	183	104.918	170	158.8	107.053	107	100.2	106.786	175	170.8	102.459	171	161.2	106.079	152	140	108.571	114	103.8	109.827
202	184	173	106.358	193	183.6	105.12	170	159.4	106.65	107	100.2	106.786	175	171	102.339	171	161.8	105.686	152	140.8	107.955	114	103.8	109.827
203	185	173.4	106.69	193	183.6	105.12	170	159.6	106.516	107	100.2	106.786	175	171.6	101.981	171	161.8	105.686	153	140.8	108.665	114	103.8	109.827
204	185	173.8	106.444	193	184	104.891	171	160.2	106.742	107	100.2	106.786	175	171.8	101.863	172	162.4	105.911	153	140.8	108.665	114	103.8	109.827
205	186	174.4	106.651	193	184.6	104.55	171	160.2	106.742	107	100.2	106.786	175	172.2	101.626	173	162.6	106.396	154	141.6	108.757	114	103.8	109.827
206	186	175	106.286	193	184.8	104.437	172	160.6	107.098	107	100.2	106.786	175	172.6	101.39	173	162.8	106.265	154	141.6	108.757	114	103.8	109.827
207	187	175.6	106.492	194	185.2	104.752	172	161	106.832	107	100.2	106.786	176	173	101.734	173	162.8	106.265	154	142	108.451	113	103.8	108.863
208	187	176.4	106.009	194	185.4	104.639	173	161.8	106.922	107	100.2	106.786	177	173.6	101.959	174	163	106.748	155	142.2	109.001	114	103.8	109.827
209	188	176.6	106.455	194	186.2	104.189	174	162	107.407	107	100.2	106.786	177	173.6	101.959	174	163.6	106.357	155	142.6	108.696	114	104.2	109.405
210	188	177.2	106.095	194	186.6	103.966	174	162	107.407	107	100.2	106.786	177	174.2	101.607	174	164.2	105.968	155	143.2	108.24	114	104.2	109.405
211	188	177.4	105.975	194	187.2	103.632	175	162.8	107.494	107	100.2	106.786	177	174.6	101.375	174	164.4	105.839	156	143.2	108.939	114	104.2	109.405
212	188	177.8	105.737	194	187.6	103.412	175	162.8	107.494	107	100.2	106.786	177	175.4	100.912	174	164.8	105.583	156	143.6	108.635	114	104.2	109.405
213	188	178	105.618	195	187.8	103.834	176	163.4	107.711	107	100.2	106.786	178	175.8	101.251	175	164.8	106.189	157	144.4	108.726	114	104.2	109.405
214	189	178.6	105.823	196	188.2	104.145	177	164.2	107.795	107	100.2	106.786	179	176.4	101.474	175	165.6	105.676	157	144.4	108.726	114	104	109.615
215	189	179	105.587	197	189	104.233	177	164.4	107.664	107	100.2	106.786	179	177	101.13	176	166	106.024	158	144.4	109.418	114	104.2	109.405
216	190	179.4	105.909	197	189.6	103.903	177	165	107.273	107	100.2	106.786	179	177.6	100.788	176	166	106.024	158	144.6	109.267	114	104.2	109.405
217	191	180.2	105.993	197	190	103.684	177	165.2	107.143	107	100.2	106.786	180	178.6	100.784	176	166.8	105.516	159	145.4	109.354	115	104.2	110.365
218	191	180.6	105.759	197	190	103.684	177	165.8	106.755	108	100.2	107.784	180	178.8	100.671	177	167	105.988	159	145.8	109.053	115	104.2	110.365
219	191	182	104.945	197	190.6	103.358	178	166.4	106.971	108	100.2	107.784	180	179.2	100.446	177	167.8	105.483	159	145.8	109.053	115	104.2	110.365
220	192	182.2	105.379	198	190.8	103.774	178	166.8	106.715	108	100.2	107.784	180	179.2	100.446	178	168	105.952	159	146.4	108.607	115	104.2	110.365
221	193	182.6	105.696	198	191.2	103.556	178	167	106.587	108	100.2	107.784	181	179.8	100.667	178	168.6	105.575	160	146.4	109.29	115	104.4	110.153
222	194	183.2	105.895	198	191.4	103.448	178	167	106.587	108	100.2	107.784	181	180.4	100.333	178	169	105.325	160	146.8	108.992	115	104.4	110.153
223	194	183.8	105.55	199	192.2	103.538	179	167.6	106.802	108	100.2	107.784	181	180.8	100.111	179	169.4	105.667	161	147	109.524	116	104.4	111.111
224	195	184.6	105.634	199	192.4	103.43	179	168	106.548	108	100.2	107.784	182	180.8	100.664	179	169.8	105.418	161	147	109.524	116	104.6	110.899
225	196	185	105.946	200	193	103.627	179	168.2	106.421	108	100.2	107.784	182	181.2	100.442	179	170	105.294	162	147.2	110.054	116	104.6	110.899
226	197	185.6	106.142	200	193	103.627	180	168.4	106.888	108	100.2	107.784	182	181.4	100.331	180	170.8	105.386	162	147.6	109.756	116	104.6	110.899
227	197	186.4	105.687	201	193.2	104.037	181	168.4	107.482	108	100.2	107.784	182	182	100	180	171.2	105.14	162	147.8	109.608	116	104.6	110.899
228	198	187.6	105.544	201	194	103.608	182	169.2	107.565	108	100.2	107.784	182	182.2	99.8902	180	171.6	104.895	163	148.4	109.838	116	104.6	110.899
229	199	188.4	105.626	202	194.4	103.909	182	169.6	107.311	108	100.2	107.784	183	182.6	100.219	180	171.8	104.773	163	148.6	109.69	116	104.6	110.899
230	200	188.8	105.932	203	194.8	104.209	182	170.4	106.808	108	100.2	107.784	183	183	100	180	172.2	104.53	163	149.2	109.249	117	104.6	111.855
231	200	189.2	105.708	203	195.2	103.996	183	170.4	107.394	108	100.2	107.784	183	183.6	99.6732	181	172.6	104.867	164	149.2	109.92	117	104.6	111.855
232	201	189.6	106.013	204	196	104.082	183	170.6	107.268	108	100.2	107.784	184	184	100	181	173	104.624	164	149.6	109.626	117	104.6	111.855
233	202	190	106.316	205	196.4	104.379	184	171.4	107.351	108	100.2	107.784	184	184.4	99.7831	182	173.4	104.96	165	149.6	110.294	117	104.8	111.641
234	202	190.8	105.87	205	197.2	103.955	185	172.2	107.433	108	100.2	107.784	184	184.8	99.5671	182	173.8	104.718	165	150.6	109.562	117	105	111.429
235	203	191.2	106.172	206	197.6	104.251	185	172.4	107.309	108	100.2	107.784	185	185	100	182	174	104.598	167	151.4	110.304	117	105	111.429
236	203	192.4	105.509	207	198.4	104.335	186	173	107.514	108	100.2	107.784	187	185.6	100.754	182	175	104	167	151.4	110.304	117	105	111.429
237	204	192.6	105.919	208	198.8	104.628	186	173.2	107.39	108	100.2	107.784	188	185.8	101.184	182	175.2	103.881	167	152.4	109.58	117	105	111.429
238	204	193.4	105.481	208	199.4	104.313	187	174.2	107.348	108	100.2	107.784	189	187.2	100.962	183	175.8	104.096	168	152.6	110.092	117	105	111.429
239	205	194	105.67	208	200.8	103.586	187	174.6	107.102	108	100.2	107.784	188	187.8	100.106	183	176	103.977	168	152.8	109.948	117	105	111.429
240	205	194.2	105.561	209	200.8	104.084	187	175.6	106.492	108	100.2	107.784	188	188.2	99.8937	183	176.6	103.624	168	153	109.804	117	105	111.429
241	206	195	105.641	209	201.4	103.774	188	175.8	106.94	108	100.2	107.784	188	188.8	99.5763	184	177	103.955	168	153.4	109.518	118	105	112.381
242	207	195.2	106.045	211	202	104.455	188	176	106.818	108	100.2	107.784	188	189.2	99.3658	184	177.6	103.604	168	153.8	109.233	118	104.8	112.595
243	208	196	106.122	211	202.6	104.146	188	176.8	106.335	108	100.2	107.784	191	189.8	100.632	184	177.8	103.487	168	154.2	108.949	118	105	112.381
244	208	196.8	105.691	212	203	104.433	190	177.2	107.223	108	100.2	107.784	191	190	100.526	185	178.8	103.468	169	154.2	109.598	118	105.2	112.167
245	208	197.6	105.263	212	203.6	104.126	190	177.6	106.982	108	100.2	107.784	191	190.4	100.315	185	179.2	103.237	170	154.4	110.104	119	105.2	113.118
246	209	198.2	105.449	213	204	104.412	190	178.2	106.622	109	100.2	108.782	191	190.8	100.105	185	179.8	102.892	170	154.6	109.961	119	105.2	113.118
247	210	198.6	105.74	214	204.6	104.594	191	178.2	107.183	109	100.2	108.782	191	191.4	99.791	185	179.8	102.892	170	155	109.677	119	105.2	113.118
248	210	199.2	105.422	214	205.4	104.187	191	178.6	106.943	109	100.2	108.782	191	192	99.4792	185	180.4	102.55	170	155.8	109.114	119	105.2	113.118
249	211	199.6	105.711	215	206	104.369	192	179.4	107.023	109	100.2	108.782	191	192.2	99.3757	185	181	102.21	170	156	108.974	120	105.2	114.068
250	213	200.6	106.181	215	206.8	103.965	193	180.4	106.984	109	100.2	108.782	191	192.8	99.0664	185	181.6	101.872	170	156.8	108.418	120	105.2	114.068
251	214	201.4	106.256	215	208	103.365	193	181.6	106.278	109	100.2	108.782	192	193.4	99.2761	185	181.8	101.76	170	157	108.28	120	105.2	114.068
252	214	202	105.941	216	208.8	103.448	194	181.8	106.711	109	100.2	108.782	192	193.8	99.0712	186	182	102.198	170	157	108.28	120	105.2	114.068
253	215	202.6	106.12	217	209.2	103.728	194	181.8	106.711	109	100.2	108.782	192	194.4	98.7654	186	182.8	101.751	170	157	108.28	120	105.4	113.852
254	215	203.2	105.807	217	210.2	103.235	195	182.4	106.908	109	100.2	108.782	192	195	98.4615	187	182.8	102.298	171	157.4	108.64	120	105.4	113.852
255	216	204.2	105.779	217	210.8	102.941	195	182.8	106.674	109	100.2	108.782	192	195.6	98.1595	188	183.2	102.62	171	158	108.228	120	105.4	113.852
256	217	204.4	106.164	218	211.4	103.122	196	183.2	106.987	109	100.2	108.782	192	196.2	97.8593	188	184	102.174	172	158.4	108.586	120	105.4	113.852
257	218	205.6	106.031	219	212	103.302	196	183.2	106.987	109	100.2	108.782	194	197	98.4772	189	184.4	102.495	173	158.4	109.217	121	105.6	114.583
258	219	206.8	105.899	220	212.8	103.383	196	184	106.522	109	100.2	108.782	194	198.2	97.8809	190	185.2	102.592	173	159	108.805	121	105.8	114.367
259	220	207	106.28	220	213.6	102.996	197	184.2	106.949	109	100.2	108.782	194	198.6	97.6838	191	185.6	102.909	174	159.4	109.159	121	105.8	114.367
260	220	207.8	105.871	221	214.2	103.175	198	184.4	107.375	109	100.2	108.782	194	199.4	97.2919	191	186.4	102.468	174	160	108.75	122	105.8	115.312
261	221	208.8	105.843	222	214.8	103.352	198	185.2	106.911	109	100.2	108.782	194	199.8	97.0971	192	187	102.674	175	160.2	109.238	122	106	115.094
262	222	209.4	106.017	222	215.4	103.064	199	185.4	107.335	110	100.2	109.78	194	200.2	96.9031	193	187.4	102.988	175	160.6	108.966	122	106	115.094
263	222	210.2	105.614	222	216	102.778	199	186	106.989	110	100.2	109.78	195	200.8	97.1116	193	188.4	102.442	175	161	108.696	122	106	115.094
264	223	210.6	105.888	223	216.8	102.86	200	186.4	107.296	110	100.2	109.78	196	201.2	97.4155	194	189	102.646	176	161.2	109.181	122	106	115.094
265	223	211.2	105.587	223	217.8	102.388	200	186.8	107.066	110	100.2	109.78	197	201.4	97.8153	194	189.4	102.429	176	161.8	108.776	122	106.2	114.878
266	224	211.8	105.76	224	218	102.752	201	187.2	107.372	110	100.2	109.78	198	202.6	97.7295	194	189.8	102.213	176	162.4	108.374	122	106.2	114.878
267	225	212.6	105.833	224	219	102.283	202	187.6	107.676	110	100.2	109.78	200	203.2	98.4252	195	190.8	102.201	177	162.8	108.722	122	106.2	114.878
268	225	212.8	105.733	226	220	102.727	203	188.8	107.521	110	100.2	109.78	200	203.4	98.3284	196	191.2	102.51	177	163	108.589	122	106.4	114.662
269	226	213.6	105.805	227	220.4	102.995	203	189	107.407	110	100.2	109.78	201	204.4	98.3366	196	192	102.083	177	163.2	108.456	122	106.4	114.662
270	226	214.4	105.41	227	221.2	102.622	203	189.4	107.181	111	100.2	110.778	202	205	98.5366	196	192.6	101.765	177	164	107.927	122	106.6	114.447
271	227	215.2	105.483	228	222	102.703	204	190	107.368	111	100.2	110.778	202	205.8	98.1535	197	192.6	102.285	177	164.2	107.795	122	106.8	114.232
272	227	216	105.093	229	222.6	102.875	204	190.4	107.143	111	100.2	110.778	203	206.4	98.3527	197	193.4	101.861	177	164.2	107.795	122	106.8	114.232
273	228	216.6	105.263	230	223.8	102.77	204	191	106.806	110	100.2	109.78	204	207	98.5507	197	193.4	101.861	177	165	107.273	122	106.8	114.232
274	229	217.4	105.336	230	224.6	102.404	206	191.2	107.741	110	100.2	109.78	205	208.2	98.463	197	194.2	101.442	177	165.4	107.013	122	106.8	114.232
275	230	218.2	105.408	231	225.6	102.394	207	191.6	108.038	110	100.2	109.78	205	208.8	98.1801	197	194.6	101.233	177	165.4	107.013	123	106.8	115.169
276	230	218.6	105.215	232	226.2	102.564	207	191.8	107.925	110	100.2	109.78	206	209.6	98.2824	199	195.2	101.947	177	166	106.627	123	106.8	115.169
277	231	219	105.479	232	227.4	102.023	208	192.6	107.996	110	100.2	109.78	206	210.2	98.0019	200	195.6	102.249	178	166.6	106.843	123	106.8	115.169
278	231	219.4	105.287	233	228	102.193	208	192.6	107.996	110	100.2	109.78	206	211	97.6303	200	196.4	101.833	178	166.8	106.715	123	106.8	115.169
279	231	220	105	235	229.2	102.531	209	193	108.29	110	100.2	109.78	207	211.6	97.8261	200	197.2	101.42	178	166.8	106.715	123	106.8	115.169
280	231	221	104.525	236	230	102.609	209	193.6	107.955	110	100.2	109.78	207	212	97.6415	200	198	101.01	178	167.2	106.459	123	106.8	115.169
281	232	221.6	104.693	238	231	103.03	209	194.2	107.621	111	100.2	110.778	208	212.6	97.8363	200	198.4	100.806	178	167.4	106.332	123	106.8	115.169
282	233	222.4	104.766	239	231.8	103.106	210	194.8	107.803	111	100.2	110.778	209	213.2	98.03	201	198.6	101.208	179	167.4	106.93	123	106.8	115.169
283	233	223	104.484	240	232.8	103.093	210	195.2	107.582	111	100.2	110.778	209	213.8	97.7549	201	199.4	100.802	179	167.4	106.93	123	106.8	115.169
284	233	224	104.018	240	233.6	102.74	210	195.8	107.252	111	100.4	110.558	209	214.6	97.3905	201	200.2	100.4	179	167.8	106.675	123	106.8	115.169
285	234	224.8	104.093	242	234.6	103.154	211	196.2	107.543	111	100.4	110.558	210	214.8	97.7654	202	200.6	100.698	179	168.2	106.421	123	107	114.953
286	234	225.6	103.723	242	235.6	102.716	211	196.8	107.215	111	100.4	110.558	212	215.6	98.3302	202	201	100.498	180	168.8	106.635	123	107.2	114.739
287	235	225.8	104.074	244	236.8	103.041	211	197.2	106.998	111	100.4	110.558	212	216	98.1481	203	201.8	100.595	180	169.2	106.383	123	107.6	114.312
288	235	226.4	103.799	245	237.4	103.201	212	198	107.071	111	100.6	110.338	213	217	98.1567	205	202.6	101.185	180	169.6	106.132	123	108	113.889
289	236	227.4	103.782	245	238.6	102.682	212	198.6	106.747	111	100.8	110.119	213	217.4	97.9761	205	203	100.985	180	169.8	106.007	123	108.2	113.678
290	236	228.4	103.327	246	239.4	102.757	213	199	107.035	111	100.8	110.119	214	218.8	97.8062	205	203.4	100.787	180	170	105.882	123	108.2	113.678
291	237	229.2	103.403	246	240.6	102.244	214	199.6	107.214	111	100.8	110.119	215	219.4	97.9945	205	204.2	100.392	180	170.4	105.634	123	108.4	113.469
292	237	229.6	103.223	247	241.6	102.235	214	200.6	106.68	111	100.8	110.119	215	219.8	97.8162	205	204.6	100.196	180	170.8	105.386	123	108.6	113.26
293	238	230.2	103.388	247	242.6	101.814	215	201.4	106.753	111	100.8	110.119	216	220.6	97.9148	206	205.2	100.39	181	171.4	105.601	123	108.8	113.051
294	238	231.2	102.941	247	243.4	101.479	216	202	106.931	111	100.8	110.119	216	221.2	97.6492	206	205.8	100.097	181	171.8	105.355	124	108.8	113.971
295	238	232	102.586	248	244.4	101.473	217	203	106.897	111	100.8	110.119	217	221.8	97.8359	206	206.2	99.903	181	172.2	105.11	124	108.8	113.971
296	240	233	103.004	249	245.4	101.467	217	203.4	106.686	111	100.8	110.119	218	222.8	97.8456	207	206.8	100.097	181	172.6	104.867	124	109	113.761
297	240	233.6	102.74	249	246.6	100.973	218	204	106.863	111	101.2	109.684	219	224.2	97.6806	208	207.4	100.289	182	173	105.202	124	109.2	113.553
298	241	234.2	102.904	252	247.6	101.777	219	204.6	107.038	111	101.2	109.684	220	224.4	98.0392	209	208	100.481	182	173.4	104.96	124	109.6	113.139
299	242	235	102.979	252	248.8	101.286	220	205	107.317	111	101.2	109.684	222	225.2	98.579	210	208.8	100.575	182	173.6	104.839	124	109.8	112.933
300	243	235.8	103.053	252	249.6	100.962	220	206	106.796	111	101	109.901	223	225.8	98.76	212	209.8	101.049	182	173.8	104.718	124	110	112.727
301	243	237	102.532	252	250.6	100.559	220	206.6	106.486	111	101.4	109.467	224	226.6	98.8526	212	210.8	100.569	182	174.8	104.119	124	110	112.727
302	245	238	102.941	253	251.6	100.556	221	207.2	106.66	111	101.6	109.252	225	227.6	98.8576	213	211.6	100.662	184	175	105.143	124	110	112.727
303	245	238.6	102.682	254	252.6	100.554	222	208	106.731	111	101.6	109.252	225	228.4	98.5114	214	212	100.943	184	175.2	105.023	124	110.2	112.523
304	246	239.6	102.671	256	253.8	100.867	222	208.2	106.628	111	101.8	109.037	225	229.4	98.082	214	212.8	100.564	184	176	104.545	124	110.2	112.523
305	247	240.6	102.66	257	255	100.784	222	209.2	106.119	111	101.8	109.037	227	230.4	98.5243	214	213.6	100.187	184	176	104.545	124	110.6	112.116
306	248	241.4	102.734	258	256.2	100.703	222	209.6	105.916	111	102	108.824	228	231.4	98.5307	214	214.4	99.8134	185	176.8	104.638	124	110.8	111.913
307	249	242.4	102.723	259	257.2	100.7	222	210.4	105.513	111	102	108.824	228	232.6	98.0224	215	214.6	100.186	185	176.8	104.638	125	110.8	112.816
308	249	243.8	102.133	259	258.2	100.31	222	210.8	105.313	111	102.2	108.611	229	233.6	98.0308	215	215.4	99.8143	185	177	104.52	125	111	112.613
309	249	244.8	101.716	260	259.4	100.231	222	211.2	105.114	111	102.4	108.398	230	234.2	98.2067	216	216.2	99.9075	186	177.6	104.73	125	111.6	112.007
310	250	246	101.626	260	260.8	99.6933	222	211.8	104.816	111	102.4	108.398	230	235.2	97.7891	217	216.8	100.092	186	178.4	104.26	125	111.6	112.007
311	251	246.2	101.95	262	261.8	100.076	222	212.8	104.323	111	102.4	108.398	231	235.8	97.9644	217	217.6	99.7243	187	178.6	104.703	125	111.8	111.807
312	252	247	102.024	264	262.8	100.457	224	213.8	104.771	111	102.6	108.187	231	236.4	97.7157	218	218.4	99.8168	187	179	104.469	126	112.2	112.299
313	253	248	102.016	266	264.2	100.681	225	214.4	104.944	111	102.6	108.187	232	237.4	97.7254	218	219	99.5434	187	179.2	104.353	126	112	112.5
314	253	249	101.606	267	265.2	100.679	225	215.6	104.36	111	102.6	108.187	233	238.6	97.653	219	219.8	99.636	187	179.8	104.004	126	112.4	112.1
315	254	249.8	101.681	268	266.2	100.676	225	216.8	103.782	111	102.6	108.187	234	239.4	97.7444	219	220.4	99.3648	188	180	104.444	126	112.4	112.1
316	254	250.6	101.357	269	267.2	100.674	226	217.2	104.052	111	102.8	107.977	234	240.2	97.4188	219	221.4	98.916	188	180.4	104.213	126	112.6	111.901
317	254	251.4	101.034	270	268.6	100.521	227	218	104.128	111	102.8	107.977	235	240.6	97.6725	220	221.8	99.1885	188	180.6	104.097	126	112.8	111.702
318	255	252.6	100.95	270	269.4	100.223	227	219.4	103.464	111	103	107.767	236	241.6	97.6821	220	222.6	98.832	188	181	103.867	126	112.8	111.702
319	256	253.6	100.946	271	270.6	100.148	228	220.2	103.542	111	103	107.767	237	242.2	97.853	221	222.6	99.2812	188	181.4	103.638	126	113	111.504
320	258	254.2	101.495	272	271.8	100.074	228	221	103.167	111	103	107.767	237	242.8	97.6112	221	223.8	98.7489	188	181.6	103.524	126	113	111.504
321	258	255.2	101.097	272	273	99.6337	229	221.6	103.339	111	103	107.767	237	243.8	97.2108	222	224.6	98.8424	189	182	103.846	126	113.2	111.307
322	258	256	100.781	273	274	99.635	230	222.2	103.51	111	103	107.767	238	244.8	97.2222	222	225	98.6667	190	182.4	104.167	126	113.2	111.307
323	260	257	101.167	273	275	99.2727	230	223	103.139	111	103.2	107.558	239	245.6	97.3127	222	225.6	98.4043	191	182.6	104.6	126	113.2	111.307
324	260	257.6	100.932	274	275.8	99.3474	230	223.6	102.862	112	103.4	108.317	240	246.4	97.4026	223	226.2	98.5853	191	183.6	104.031	126	113.4	111.111
325	261	258.8	100.85	275	276.2	99.5655	231	224.2	103.033	112	103.4	108.317	240	247.4	97.0089	223	226.8	98.3245	193	184	104.891	127	113.8	111.599
326	262	260.2	100.692	276	278	99.2806	232	225.4	102.928	112	103.4	108.317	240	248	96.7742	224	227.6	98.4183	193	184.8	104.437	127	113.8	111.599
327	262	261.2	100.306	276	279	98.9247	233	226.4	102.915	112	103.4	108.317	242	249	97.1888	224	228.2	98.1595	193	184.8	104.437	127	113.8	111.599
328	264	262.2	100.686	277	280	98.9286	234	227.4	102.902	112	103.6	108.108	242	250	96.8	224	228.8	97.9021	194	185.4	104.639	127	113.8	111.599
329	264	263.2	100.304	278	281.4	98.7918	234	228	102.632	112	103.6	108.108	243	250.4	97.0447	225	229.8	97.9112	194	186	104.301	127	113.8	111.599
330	265	263.6	100.531	279	282.6	98.7261	234	228.4	102.452	112	103.6	108.108	244	251.6	96.9793	226	230	98.2609	194	186.2	104.189	127	114	111.404
331	266	264.6	100.529	279	283.8	98.3087	235	229.2	102.531	112	103.6	108.108	244	252.6	96.5954	226	231	97.8355	194	187.2	103.632	126	114.4	110.14
332	267	265.6	100.527	281	284.8	98.6657	235	230	102.174	112	103.6	108.108	245	253.4	96.6851	226	231.2	97.7509	194	187.8	103.301	126	114.4	110.14
333	268	266.8	100.45	282	286.2	98.5325	235	230.8	101.82	112	103.8	107.9	246	254.2	96.7742	227	231.6	98.0138	195	188	103.723	126	114.4	110.14
334	268	267.6	100.149	282	287.4	98.1211	235	231.6	101.468	112	103.8	107.9	246	254.6	96.6222	229	232.6	98.4523	195	188.2	103.613	126	114.6	109.948
335	268	268.6	99.7766	283	288.6	98.0596	236	232.6	101.462	111	103.8	106.936	247	255.6	96.6354	229	233.2	98.199	196	189	103.704	126	114.8	109.756
336	269	269.6	99.7774	284	289.6	98.0663	237	233.2	101.63	111	103.8	106.936	248	256.6	96.6485	230	234.6	98.0392	196	189.4	103.485	126	115.2	109.375
337	270	270.4	99.8521	284	290.8	97.6616	237	234	101.282	111	103.8	106.936	248	257.6	96.2733	230	236	97.4576	196	189.8	103.267	125	115.2	108.507
338	270	271.6	99.4109	285	291.8	97.6696	239	234.4	101.962	111	104.2	106.526	249	258.4	96.3622	231	237	97.4684	196	190.6	102.833	125	115.4	108.319
339	271	272.6	99.4131	285	292.2	97.5359	239	235.2	101.616	111	104.4	106.322	250	259.2	96.4506	231	237.6	97.2222	197	190.8	103.249	125	115.6	108.131
340	271	273.2	99.1947	286	293.6	97.4114	239	236.2	101.185	111	104.4	106.322	251	260.4	96.3902	232	238.2	97.3971	197	191	103.141	125	115.8	107.945
341	272	274.8	98.9811	288	294.8	97.6934	239	236.8	100.929	111	104.4	106.322	251	261.4	96.0214	232	238.6	97.2339	198	192	103.125	126	115.8	108.808
342	273	275.8	98.9848	288	295.6	97.429	240	237.2	101.18	111	104.4	106.322	252	262.4	96.0366	233	239.4	97.3266	198	192.4	102.911	125	116	107.759
343	274	276.6	99.06	291	297	97.9798	240	238.4	100.671	111	104.4	106.322	253	263.4	96.0516	233	240.8	96.7608	198	193	102.591	125	116	107.759
344	275	278.2	98.8497	292	298	97.9866	240	239.2	100.334	111	104.4	106.322	254	264.2	96.1393	234	241.4	96.9345	198	193.2	102.484	125	116	107.759
345	276	279	98.9247	293	298.8	98.0589	240	240	100	111	104.4	106.322	254	265.2	95.7768	234	242.4	96.5347	199	193.4	102.896	126	116	108.621
346	276	280	98.5714	293	299.4	97.8624	242	240.8	100.498	111	104.6	106.119	254	266.2	95.417	236	243.4	96.9597	199	194.4	102.366	126	116.2	108.434
347	276	281	98.2206	294	300.8	97.7394	243	241.6	100.579	111	104.6	106.119	255	267	95.5056	236	244.4	96.563	200	195	102.564	126	116.4	108.247
348	277	282.2	98.1573	294	301.8	97.4155	243	242.4	100.248	111	104.6	106.119	257	267.6	96.0389	236	245.4	96.1695	200	195.4	102.354	126	116.4	108.247
349	277	283	97.8799	294	303	97.0297	244	243.6	100.164	111	104.6	106.119	258	268	96.2687	237	246.2	96.2632	200	195.6	102.249	126	116.8	107.877
350	277	284.2	97.4666	295	304.2	96.9757	245	244.4	100.245	111	104.6	106.119	260	269	96.6543	237	246.8	96.0292	200	196	102.041	126	116.8	107.877
351	277	285	97.193	296	305.2	96.9856	245	245	100	111	104.6	106.119	261	270	96.6667	237	247.8	95.6416	200	196.8	101.626	126	117	107.692
352	279	286.2	97.4843	296	306.6	96.5427	246	246	100	111	104.8	105.916	261	270.8	96.3811	238	248.8	95.6592	200	197.2	101.42	126	117.2	107.509
353	279	287.4	97.0772	297	307.4	96.6168	246	247	99.5951	111	105	105.714	261	271.6	96.0972	239	249.8	95.6765	200	197.4	101.317	126	117.6	107.143
354	280	288.4	97.0874	298	308.4	96.6278	247	248	99.5968	112	105.2	106.464	262	272.6	96.1115	240	250.6	95.7702	202	198.2	101.917	126	117.6	107.143
355	281	289.6	97.0304	299	309.6	96.5762	248	248.6	99.7586	112	105.2	106.464	262	273.2	95.9004	241	251.2	95.9395	202	198.4	101.815	126	117.6	107.143
356	281	290.6	96.6965	299	310.6	96.2653	248	250	99.2	112	105	106.667	263	273.8	96.0555	242	252.2	95.9556	202	199.2	101.406	126	117.6	107.143
357	281	291.8	96.2988	300	311.6	96.2773	249	250.6	99.3615	112	105	106.667	263	274.6	95.7757	243	253	96.0474	203	200	101.5	126	117.8	106.961
358	282	292.8	96.3115	300	312.4	96.0307	250	251.8	99.2851	112	105.2	106.464	265	275.6	96.1538	244	253.6	96.2145	204	200.4	101.796	127	117.8	107.81
359	283	293.8	96.324	301	313.8	95.921	251	252.8	99.288	113	105.4	107.211	266	276.6	96.1678	244	254.8	95.7614	204	201.4	101.291	127	117.8	107.81
360	284	295.2	96.206	302	314.8	95.9339	252	253.6	99.3691	113	105.6	107.008	268	277.2	96.6811	245	256	95.7031	205	201.6	101.687	127	118	107.627
361	285	296.4	96.1538	302	316.2	95.5092	252	254.6	98.9788	113	105.6	107.008	270	277.8	97.1922	247	256.6	96.2588	205	202	101.485	127	118	107.627
362	286	297.6	96.1022	302	317	95.2681	253	255.4	99.0603	113	105.6	107.008	272	279	97.491	247	257.6	95.8851	206	202.6	101.678	127	118.2	107.445
363	287	298.8	96.0509	304	318	95.5975	254	256.6	98.9867	113	105.6	107.008	274	280.2	97.7873	247	258	95.7364	207	203.2	101.87	127	118.2	107.445
364	288	299.8	96.064	305	319.2	95.5514	254	257.2	98.7558	113	106	106.604	274	281.6	97.3011	248	258.8	95.8269	207	203.8	101.57	127	118.4	107.264
365	288	300.8	95.7447	305	320.2	95.253	254	258	98.4496	113	106	106.604	275	282.2	97.4486	249	259.4	95.9907	207	204.2	101.371	128	118.4	108.108
366	288	302.2	95.3011	307	321.4	95.5196	254	258.6	98.2212	113	106.2	106.403	277	283	97.8799	249	260.4	95.6221	207	205	100.976	128	118.8	107.744
367	289	303.2	95.3166	307	322.6	95.1643	255	259.8	98.1524	113	106.2	106.403	278	284	97.8873	249	261	95.4023	208	205.6	101.167	128	119	107.563
368	291	304.2	95.6607	307	323.8	94.8116	255	260.4	97.9263	113	106.2	106.403	279	284.8	97.9635	250	262	95.4198	208	206.2	100.873	128	119.2	107.383
369	291	305.2	95.3473	308	325	94.7692	257	261	98.4674	113	106.2	106.403	281	285.6	98.3894	251	262.4	95.6555	208	206.6	100.678	128	119.2	107.383
370	293	306.6	95.5643	308	326.2	94.4206	257	261.6	98.2416	113	106.2	106.403	282	286.6	98.395	251	263.8	95.1478	209	206.8	101.064	128	119.6	107.023
371	293	307.6	95.2536	310	327	94.8012	258	262.8	98.1735	113	106.2	106.403	283	287.4	98.469	252	264.8	95.1662	209	207.4	100.771	128	119.6	107.023
372	294	308.6	95.269	310	328	94.5122	258	263.8	97.8014	113	106.2	106.403	284	288.8	98.338	252	265	95.0943	210	208.4	100.768	128	119.6	107.023
373	294	309.6	94.9612	312	329	94.8328	258	264.6	97.5057	113	106.2	106.403	285	289.8	98.3437	253	266.2	95.0413	210	208.8	100.575	128	119.6	107.023
374	296	310.6	95.2994	313	330.2	94.791	258	265.8	97.0655	113	106.2	106.403	285	290.4	98.1405	254	267.6	94.9178	211	209.6	100.668	129	119.8	107.679
375	296	312	94.8718	313	331.4	94.4478	258	266.6	96.7742	113	106.2	106.403	285	291.4	97.8037	254	268.2	94.7054	211	210.4	100.285	129	120	107.5
376	297	313.4	94.7671	314	332.6	94.4077	259	267.6	96.7862	113	106.4	106.203	286	292.4	97.8112	255	268.8	94.8661	212	211	100.474	129	120.2	107.321
377	297	314.4	94.4656	315	334.2	94.2549	259	268.6	96.4259	113	106.6	106.004	287	293	97.9522	255	269.6	94.5846	212	211.6	100.189	130	120.6	107.794
378	298	315.4	94.4832	316	334.6	94.4411	260	269.6	96.4392	113	106.8	105.805	287	294	97.619	256	270.4	94.6746	214	212	100.943	130	120.6	107.794
379	299	316.2	94.5604	317	336	94.3452	260	270.4	96.1538	113	106.8	105.805	288	295.2	97.561	256	271.2	94.3953	215	212.4	101.224	130	120.6	107.794
380	300	317.4	94.518	318	337	94.362	260	271.2	95.8702	113	106.6	106.004	290	296.2	97.9068	256	272	94.1176	216	213.2	101.313	130	120.8	107.616
381	300	318.4	94.2211	319	338	94.3787	262	272	96.3235	113	107	105.607	290	297.2	97.5774	257	272.8	94.2082	216	214.2	100.84	131	120.8	108.444
382	300	319.2	93.985	319	339	94.1003	262	272.8	96.0411	113	107	105.607	291	297.8	97.7166	257	273.2	94.0703	217	214.4	101.213	131	120.8	108.444
383	302	320.6	94.1984	319	340.2	93.7684	264	274	96.3504	113	107.2	105.41	292	299.4	97.5284	257	274.2	93.7272	218	215	101.395	131	121.2	108.086
384	303	322	94.0994	320	341.6	93.6768	265	275	96.3636	114	107	106.542	293	300.2	97.6016	257	274.8	93.5226	219	215.8	101.483	131	121.4	107.908
385	303	323.2	93.75	320	342.8	93.3489	265	276.2	95.945	114	107	106.542	294	301	97.6744	258	276	93.4783	220	216.4	101.664	131	121.6	107.73
386	304	324.8	93.5961	322	344	93.6047	266	276.8	96.0983	114	107	106.542	294	301.8	97.4155	258	277	93.1408	221	217	101.843	131	121.4	107.908
387	305	325.6	93.6732	322	345	93.3333	266	278.2	95.6147	114	107	106.542	294	303	97.0297	258	278.2	92.739	221	217.6	101.562	131	121.8	107.553
388	305	326.8	93.3293	323	346.4	93.2448	267	278.6	95.8363	114	107.2	106.343	295	303.8	97.1034	259	278.8	92.8981	221	218.6	101.098	131	121.8	107.553
389	305	328	92.9878	324	347.2	93.318	268	279.4	95.9198	114	107.2	106.343	296	305	97.0492	259	279.6	92.6323	222	219.2	101.277	131	121.8	107.553
390	305	329.4	92.5926	324	348.6	92.9432	268	280.2	95.646	114	107.2	106.343	297	306	97.0588	260	280.4	92.7247	222	220.2	100.817	131	122	107.377
391	306	330	92.7273	325	349.6	92.9634	268	281.4	95.2381	114	107.2	106.343	298	306.4	97.2585	261	280.8	92.9487	223	220.6	101.088	131	122.4	107.026
392	306	331.2	92.3913	326	350.8	92.9304	269	282.2	95.3225	114	107.4	106.145	300	307.2	97.6562	262	281.6	93.0398	223	221.2	100.814	132	122.4	107.843
393	307	332.4	92.3586	327	351.8	92.9505	271	283.4	95.6246	114	107.4	106.145	300	308.8	97.1503	262	282.6	92.7105	223	222.4	100.27	132	122.4	107.843
394	308	333.6	92.3261	327	353.4	92.5297	271	284.4	95.2883	114	107.4	106.145	301	309.6	97.2222	263	283.2	92.8672	224	222.8	100.539	132	122.8	107.492
395	309	334.6	92.3491	328	354.2	92.603	272	285.6	95.2381	114	107.4	106.145	302	310.4	97.2938	264	284.2	92.8923	224	223.4	100.269	132	123	107.317
396	310	336.4	92.1522	328	355.4	92.2904	273	286.4	95.3212	114	107.6	105.948	302	311.4	96.9814	264	284.8	92.6966	225	224.2	100.357	132	123	107.317
397	310	337.4	91.8791	329	356.4	92.312	274	287.6	95.2712	114	107.6	105.948	302	312	96.7949	264	286	92.3077	225	224.8	100.089	132	122.8	107.492
398	310	338.8	91.4994	329	357.4	92.0537	274	288.4	95.0069	114	107.6	105.948	303	313	96.8051	265	287.2	92.2702	225	225.6	99.734	132	123	107.317
399	310	339.8	91.2301	330	358.4	92.0759	275	289.4	95.0242	114	107.6	105.948	304	313.8	96.877	265	288.2	91.95	227	226.4	100.265	132	123.2	107.143
400	312	340.8	91.5493	332	359.4	92.3762	275	290.4	94.697	114	107.6	105.948	306	315	97.1429	266	289	92.0415	228	227	100.441	132	123.4	106.969
Aerage			102.689			101.313			103.654			106.141			99.889			102.24			105.235			107.666
