# Supplementary material for: Empirical single-cell tracking and cell-fate simulation reveal dual roles of p53 in tumor suppression
Source: eLife. 2022 Sep 20;11:e72498. doi: 10.7554/eLife.72498 (PMC9560164; doi:10.7554/eLife.72498)
Supplement: Figure 10—source data 1. — Data used in Figure 10. [file elife-72498-fig10-data1.xlsx]

## Sheet: Control-MNNG (a)
	No of cells							No of cells							No of cells							No of cells							No of cells							No of cells							No of cells
Time	Control-sim	Control-sim	Control-sim	Control-sim	Control-sim	Average		MNNG0.5-sim	MNNG0.5-sim	MNNG0.5-sim	MNNG0.5-sim	MNNG0.5-sim	Average		MNNG1-sim	MNNG1-sim	MNNG1-sim	MNNG1-sim	MNNG1-sim	Average		MNNG1.5-sim	MNNG1.5-sim	MNNG1.5-sim	MNNG1.5-sim	MNNG1.5-sim	Average		MNNG2-sim	MNNG2-sim	MNNG2-sim	MNNG2-sim	MNNG2-sim	Average		MNNG2.5-sim	MNNG2.5-sim	MNNG2.5-sim	MNNG2.5-sim	MNNG2.5-sim	Average		MNNG3-sim	MNNG3-sim	MNNG3-sim	MNNG3-sim	MNNG3-sim	Average
0	1000	1000	1000	1000	1000	1000		1000	1000	1000	1000	1000	1000		1000	1000	1000	1000	1000	1000		1000	1000	1000	1000	1000	1000		1000	1000	1000	1000	1000	1000		1000	1000	1000	1000	1000	1000		1000	1000	1000	1000	1000	1000
1	1000	1000	1000	1000	1000	1000		1000	1000	1000	1000	1000	1000		1000	1000	1000	1000	1000	1000		1000	1000	1000	1000	1000	1000		1000	1000	1000	1000	1000	1000		1000	1000	1000	1000	1000	1000		1000	1000	1000	1000	1000	1000
2	1000	1000	1000	1000	1000	1000		1000	1000	1000	1000	1000	1000		1000	1000	1000	1000	1000	1000		1000	1000	1000	1000	1000	1000		1000	1000	1000	1000	1000	1000		1000	1000	1000	1000	1000	1000		1000	1000	1000	1000	1000	1000
3	1000	1000	1000	1000	1000	1000		1000	1000	1000	1000	1000	1000		1000	1000	1000	1000	1000	1000		1000	1000	1000	1000	1000	1000		1000	1000	1000	1000	1000	1000		1000	1000	1000	1000	1000	1000		1000	1000	1000	1000	1000	1000
4	1000	1000	1000	1000	1000	1000		1000	1000	1000	1000	1000	1000		1000	1000	1000	1000	1000	1000		1000	1000	1000	1000	1000	1000		1000	1000	1000	1000	1000	1000		1000	1000	1000	1000	1000	1000		1000	1000	1000	1000	1000	1000
5	1003	1011	1012	1007	1008	1008.2		1003	1006	1007	1007	1013	1007.2		1002	1004	1001	1003	1002	1002.4		1008	1005	1003	1009	1004	1005.8		1016	1009	1004	1006	1006	1008.2		1010	1003	1004	1008	1005	1006		1008	1003	1010	1004	1017	1008.4
6	1007	1017	1015	1011	1010	1012		1008	1010	1013	1014	1018	1012.6		1010	1010	1007	1010	1005	1008.4		1012	1011	1007	1011	1006	1009.4		1024	1009	1004	1009	1008	1010.8		1010	1003	1004	1008	1005	1006		1008	1003	1010	1004	1017	1008.4
7	1007	1017	1015	1010	1009	1011.6		1008	1010	1013	1014	1018	1012.6		1010	1010	1007	1010	1005	1008.4		1012	1013	1009	1012	1011	1011.4		1027	1010	1005	1011	1013	1013.2		1016	1010	1012	1011	1008	1011.4		1012	1009	1014	1010	1022	1013.4
8	1009	1018	1017	1010	1011	1013		1010	1014	1019	1017	1022	1016.4		1012	1011	1009	1012	1006	1010		1017	1024	1016	1024	1014	1019		1030	1015	1011	1018	1016	1018		1020	1018	1023	1020	1016	1019.4		1016	1016	1018	1017	1028	1019
9	1021	1034	1031	1025	1017	1025.6		1011	1016	1023	1018	1025	1018.6		1015	1014	1010	1013	1009	1012.2		1022	1032	1022	1026	1017	1023.8		1032	1017	1012	1018	1017	1019.2		1022	1019	1024	1021	1019	1021		1018	1017	1020	1024	1030	1021.8
10	1023	1036	1032	1028	1021	1028		1011	1016	1023	1018	1025	1018.6		1015	1014	1010	1013	1009	1012.2		1022	1032	1022	1026	1017	1023.8		1032	1017	1012	1018	1017	1019.2		1022	1019	1024	1021	1019	1021		1018	1017	1020	1024	1030	1021.8
11	1031	1041	1037	1033	1028	1034		1015	1016	1026	1019	1027	1020.6		1015	1014	1010	1013	1009	1012.2		1022	1032	1022	1026	1017	1023.8		1032	1017	1012	1018	1017	1019.2		1022	1019	1024	1021	1019	1021		1018	1017	1020	1024	1030	1021.8
12	1034	1045	1038	1035	1030	1036.4		1020	1018	1030	1022	1031	1024.2		1020	1019	1013	1015	1014	1016.2		1027	1037	1025	1029	1020	1027.6		1034	1021	1012	1021	1022	1022		1026	1020	1029	1021	1021	1023.4		1019	1019	1022	1029	1034	1024.6
13	1034	1045	1038	1035	1030	1036.4		1024	1024	1035	1023	1038	1028.8		1023	1024	1019	1022	1022	1022		1038	1044	1027	1039	1025	1034.6		1035	1022	1016	1024	1025	1024.4		1027	1023	1035	1023	1023	1026.2		1019	1023	1024	1032	1037	1027
14	1038	1048	1039	1037	1033	1039		1025	1028	1045	1022	1039	1031.8		1027	1029	1021	1024	1023	1024.8		1041	1044	1027	1040	1027	1035.8		1036	1026	1020	1025	1028	1027		1029	1026	1037	1028	1026	1029.2		1023	1026	1024	1037	1040	1030
15	1038	1048	1039	1037	1033	1039		1026	1031	1048	1023	1039	1033.4		1029	1034	1023	1033	1030	1029.8		1044	1049	1029	1046	1031	1039.8		1039	1028	1021	1028	1030	1029.2		1031	1029	1037	1031	1028	1031.2		1024	1028	1029	1041	1045	1033.4
16	1038	1048	1039	1037	1033	1039		1026	1031	1048	1023	1039	1033.4		1029	1033	1023	1033	1030	1029.6		1044	1049	1029	1046	1031	1039.8		1040	1030	1025	1032	1031	1031.6		1034	1035	1038	1034	1029	1034		1027	1030	1033	1043	1048	1036.2
17	1038	1048	1039	1037	1033	1039		1032	1037	1055	1028	1044	1039.2		1033	1041	1029	1039	1041	1036.6		1050	1053	1039	1050	1035	1045.4		1041	1033	1025	1034	1033	1033.2		1040	1038	1043	1038	1033	1038.4		1027	1030	1033	1043	1048	1036.2
18	1038	1048	1039	1037	1033	1039		1044	1041	1063	1035	1059	1048.4		1043	1055	1041	1051	1050	1048		1054	1057	1041	1052	1038	1048.4		1043	1036	1027	1035	1035	1035.2		1042	1040	1044	1042	1034	1040.4		1030	1032	1035	1046	1052	1039
19	1039	1050	1040	1038	1036	1040.6		1047	1044	1069	1042	1066	1053.6		1045	1056	1045	1057	1056	1051.8		1057	1064	1041	1054	1041	1051.4		1045	1037	1030	1038	1038	1037.6		1042	1040	1044	1042	1034	1040.4		1030	1032	1035	1046	1052	1039
20	1044	1052	1045	1042	1041	1044.8		1050	1048	1070	1048	1072	1057.6		1051	1063	1047	1062	1058	1056.2		1060	1069	1046	1062	1047	1056.8		1049	1040	1032	1041	1045	1041.4		1044	1040	1046	1044	1035	1041.8		1034	1035	1037	1048	1053	1041.4
21	1048	1058	1046	1043	1045	1048		1054	1050	1072	1053	1077	1061.2		1051	1063	1047	1062	1058	1056.2		1060	1069	1046	1062	1047	1056.8		1051	1042	1033	1044	1048	1043.6		1045	1042	1047	1045	1036	1043		1036	1037	1038	1053	1054	1043.6
22	1053	1061	1054	1050	1048	1053.2		1057	1054	1075	1056	1080	1064.4		1054	1066	1050	1063	1060	1058.6		1063	1071	1048	1064	1051	1059.4		1051	1044	1035	1047	1050	1045.4		1047	1045	1049	1049	1038	1045.6		1037	1040	1038	1054	1055	1044.8
23	1058	1070	1061	1059	1055	1060.6		1058	1055	1077	1056	1084	1066		1054	1066	1050	1062	1060	1058.4		1063	1071	1048	1064	1051	1059.4		1051	1044	1035	1047	1050	1045.4		1047	1045	1049	1049	1038	1045.6		1037	1040	1038	1054	1055	1044.8
24	1058	1070	1061	1059	1055	1060.6		1062	1056	1077	1059	1086	1068		1055	1072	1051	1065	1065	1061.6		1064	1073	1051	1067	1051	1061.2		1057	1051	1041	1050	1057	1051.2		1051	1050	1055	1061	1043	1052		1041	1045	1042	1062	1060	1050
25	1058	1070	1060	1059	1055	1060.4		1062	1056	1077	1059	1086	1068		1055	1072	1051	1065	1065	1061.6		1064	1073	1051	1067	1051	1061.2		1057	1051	1041	1050	1057	1051.2		1051	1050	1055	1061	1043	1052		1041	1045	1042	1062	1060	1050
26	1066	1076	1066	1066	1063	1067.4		1066	1069	1081	1063	1089	1073.6		1057	1072	1053	1073	1066	1064.2		1066	1075	1057	1070	1052	1064		1057	1051	1041	1050	1057	1051.2		1051	1050	1055	1061	1043	1052		1041	1045	1042	1062	1060	1050
27	1066	1076	1066	1066	1062	1067.2		1066	1068	1081	1063	1089	1073.4		1056	1072	1053	1073	1066	1064		1066	1075	1057	1070	1052	1064		1060	1056	1042	1052	1058	1053.6		1054	1052	1055	1065	1045	1054.2		1045	1045	1046	1062	1062	1052
28	1068	1080	1075	1070	1070	1072.6		1073	1073	1083	1070	1093	1078.4		1059	1078	1062	1076	1069	1068.8		1072	1078	1061	1076	1054	1068.2		1063	1056	1046	1054	1065	1056.8		1055	1057	1060	1068	1046	1057.2		1045	1047	1047	1062	1064	1053
29	1068	1080	1075	1070	1070	1072.6		1076	1076	1085	1074	1097	1081.6		1062	1079	1064	1077	1072	1070.8		1074	1081	1062	1079	1059	1071		1064	1060	1050	1056	1065	1059		1055	1060	1061	1072	1050	1059.6		1047	1050	1048	1062	1067	1054.8
30	1068	1080	1075	1070	1070	1072.6		1076	1076	1085	1074	1097	1081.6		1062	1079	1064	1077	1072	1070.8		1074	1081	1062	1079	1059	1071		1064	1060	1050	1056	1065	1059		1055	1060	1061	1072	1050	1059.6		1047	1050	1048	1062	1067	1054.8
31	1068	1080	1075	1070	1070	1072.6		1076	1076	1085	1074	1097	1081.6		1062	1079	1064	1076	1072	1070.6		1074	1081	1062	1079	1059	1071		1064	1060	1050	1056	1065	1059		1055	1060	1061	1072	1050	1059.6		1047	1050	1048	1062	1067	1054.8
32	1068	1080	1075	1070	1070	1072.6		1080	1079	1089	1075	1099	1084.4		1064	1082	1069	1082	1074	1074.2		1076	1087	1064	1081	1061	1073.8		1064	1060	1050	1056	1065	1059		1055	1060	1061	1072	1050	1059.6		1047	1050	1048	1062	1067	1054.8
33	1071	1082	1076	1075	1075	1075.8		1080	1080	1093	1080	1102	1087		1064	1083	1071	1087	1078	1076.6		1077	1093	1065	1084	1061	1076		1064	1060	1050	1056	1065	1059		1055	1060	1061	1072	1050	1059.6		1047	1050	1048	1062	1067	1054.8
34	1071	1082	1076	1075	1075	1075.8		1081	1083	1096	1083	1103	1089.2		1067	1086	1074	1093	1083	1080.6		1080	1096	1073	1090	1064	1080.6		1066	1063	1052	1059	1070	1062		1055	1062	1062	1076	1053	1061.6		1048	1054	1052	1064	1071	1057.8
35	1071	1082	1076	1075	1075	1075.8		1081	1083	1096	1083	1103	1089.2		1067	1086	1074	1093	1083	1080.6		1080	1096	1073	1090	1064	1080.6		1066	1062	1052	1059	1070	1061.8		1055	1062	1062	1076	1053	1061.6		1048	1054	1052	1064	1071	1057.8
36	1071	1082	1076	1075	1075	1075.8		1081	1083	1096	1083	1103	1089.2		1067	1086	1074	1093	1083	1080.6		1080	1096	1073	1090	1064	1080.6		1068	1068	1055	1061	1073	1065		1058	1064	1069	1077	1055	1064.6		1049	1057	1055	1066	1075	1060.4
37	1075	1089	1077	1080	1078	1079.8		1083	1088	1096	1086	1104	1091.4		1067	1086	1074	1093	1083	1080.6		1080	1096	1073	1090	1064	1080.6		1071	1072	1056	1062	1078	1067.8		1059	1065	1072	1082	1057	1067		1053	1060	1057	1067	1077	1062.8
38	1088	1098	1082	1092	1088	1089.6		1088	1093	1098	1088	1111	1095.6		1067	1086	1074	1093	1083	1080.6		1082	1099	1078	1090	1066	1083		1074	1075	1058	1063	1079	1069.8		1064	1070	1075	1083	1063	1071		1057	1064	1059	1070	1078	1065.6
39	1088	1100	1085	1093	1090	1091.2		1093	1099	1102	1094	1113	1100.2		1072	1089	1077	1098	1085	1084.2		1085	1101	1082	1093	1070	1086.2		1079	1076	1059	1063	1081	1071.6		1064	1070	1075	1083	1063	1071		1057	1064	1059	1070	1078	1065.6
40	1089	1100	1087	1097	1094	1093.4		1093	1099	1102	1094	1113	1100.2		1072	1089	1077	1098	1085	1084.2		1085	1101	1082	1093	1070	1086.2		1079	1076	1059	1063	1081	1071.6		1064	1070	1075	1083	1063	1071		1057	1064	1059	1070	1078	1065.6
41	1091	1103	1089	1097	1097	1095.4		1094	1103	1106	1094	1113	1102		1071	1092	1080	1102	1088	1086.6		1090	1106	1083	1093	1074	1089.2		1083	1078	1061	1064	1082	1073.6		1068	1073	1079	1084	1067	1074.2		1060	1065	1061	1070	1080	1067.2
42	1091	1103	1094	1099	1099	1097.2		1094	1103	1106	1094	1113	1102		1071	1092	1080	1102	1088	1086.6		1094	1110	1084	1094	1076	1091.6		1085	1083	1065	1066	1089	1077.6		1073	1081	1083	1087	1075	1079.8		1060	1075	1077	1077	1088	1075.4
43	1091	1103	1094	1099	1099	1097.2		1093	1103	1106	1094	1113	1101.8		1071	1092	1080	1102	1088	1086.6		1094	1110	1084	1094	1076	1091.6		1085	1083	1065	1066	1089	1077.6		1073	1081	1083	1087	1075	1079.8		1060	1075	1077	1077	1088	1075.4
44	1097	1108	1095	1100	1100	1100		1093	1106	1110	1096	1116	1104.2		1073	1096	1081	1104	1091	1089		1098	1118	1089	1097	1079	1096.2		1091	1088	1070	1071	1096	1083.2		1079	1085	1089	1091	1080	1084.8		1066	1078	1085	1089	1089	1081.4
45	1099	1113	1097	1104	1102	1103		1093	1106	1110	1096	1116	1104.2		1071	1096	1081	1104	1091	1088.6		1098	1118	1089	1097	1079	1096.2		1094	1091	1074	1074	1104	1087.4		1085	1089	1090	1092	1084	1088		1067	1081	1091	1093	1091	1084.6
46	1109	1116	1097	1107	1103	1106.4		1098	1115	1118	1105	1121	1111.4		1077	1103	1088	1110	1099	1095.4		1103	1126	1092	1101	1085	1101.4		1103	1098	1080	1079	1114	1094.8		1091	1093	1095	1097	1090	1093.2		1069	1086	1094	1093	1095	1087.4
47	1113	1120	1101	1113	1109	1111.2		1100	1115	1121	1107	1123	1113.2		1077	1103	1088	1110	1099	1095.4		1103	1126	1092	1101	1085	1101.4		1103	1098	1080	1079	1114	1094.8		1090	1093	1095	1097	1090	1093		1069	1086	1094	1093	1095	1087.4
48	1121	1121	1105	1118	1115	1116		1102	1118	1122	1108	1126	1115.2		1077	1103	1088	1110	1099	1095.4		1103	1125	1092	1101	1085	1101.2		1103	1098	1080	1079	1114	1094.8		1090	1093	1095	1097	1090	1093		1069	1086	1094	1093	1095	1087.4
49	1125	1123	1112	1124	1120	1120.8		1104	1121	1124	1111	1126	1117.2		1077	1103	1088	1110	1099	1095.4		1103	1125	1092	1101	1085	1101.2		1103	1098	1080	1079	1114	1094.8		1090	1093	1095	1097	1090	1093		1069	1086	1094	1093	1095	1087.4
50	1131	1127	1119	1128	1125	1126		1108	1124	1126	1114	1130	1120.4		1082	1105	1091	1114	1103	1099		1106	1127	1092	1107	1089	1104.2		1106	1101	1080	1080	1118	1097		1091	1094	1097	1101	1093	1095.2		1070	1089	1097	1095	1095	1089.2
51	1140	1129	1126	1132	1130	1131.4		1111	1126	1130	1115	1132	1122.8		1083	1109	1095	1116	1109	1102.4		1109	1128	1096	1110	1094	1107.4		1106	1101	1080	1080	1118	1097		1091	1094	1097	1101	1093	1095.2		1070	1089	1097	1095	1095	1089.2
52	1140	1128	1126	1132	1130	1131.2		1111	1126	1130	1115	1132	1122.8		1083	1109	1095	1116	1109	1102.4		1114	1130	1099	1113	1098	1110.8		1108	1107	1083	1082	1120	1100		1099	1100	1103	1111	1100	1102.6		1075	1094	1098	1097	1097	1092.2
53	1145	1128	1128	1134	1132	1133.4		1113	1127	1136	1117	1138	1126.2		1084	1111	1097	1119	1113	1104.8		1117	1132	1101	1114	1101	1113		1110	1110	1085	1084	1121	1102		1106	1101	1107	1115	1104	1106.6		1076	1099	1100	1101	1100	1095.2
54	1151	1134	1135	1136	1143	1139.8		1114	1134	1138	1125	1144	1131		1088	1117	1099	1123	1119	1109.2		1122	1135	1103	1116	1104	1116		1112	1113	1088	1084	1125	1104.4		1106	1101	1107	1115	1104	1106.6		1076	1099	1100	1101	1100	1095.2
55	1154	1138	1138	1138	1144	1142.4		1116	1138	1143	1134	1152	1136.6		1096	1127	1104	1129	1132	1117.6		1126	1141	1105	1120	1109	1120.2		1119	1119	1091	1089	1128	1109.2		1109	1103	1110	1117	1107	1109.2		1084	1101	1101	1102	1103	1098.2
56	1160	1143	1144	1144	1150	1148.2		1118	1141	1143	1137	1155	1138.8		1097	1128	1111	1132	1134	1120.4		1128	1142	1110	1125	1110	1123		1123	1120	1093	1093	1129	1111.6		1114	1105	1114	1119	1109	1112.2		1086	1101	1104	1104	1105	1100
57	1159	1143	1144	1144	1150	1148		1118	1141	1143	1137	1155	1138.8		1096	1128	1111	1132	1134	1120.2		1127	1142	1110	1125	1110	1122.8		1125	1125	1094	1095	1131	1114		1117	1112	1115	1123	1110	1115.4		1089	1105	1104	1106	1107	1102.2
58	1162	1149	1147	1149	1151	1151.6		1123	1145	1146	1141	1161	1143.2		1096	1131	1115	1135	1137	1122.8		1131	1145	1112	1128	1111	1125.4		1125	1125	1094	1095	1130	1113.8		1117	1112	1115	1123	1110	1115.4		1089	1105	1104	1106	1107	1102.2
59	1162	1149	1147	1149	1151	1151.6		1123	1145	1146	1141	1161	1143.2		1096	1131	1115	1135	1137	1122.8		1131	1145	1112	1128	1111	1125.4		1126	1125	1099	1097	1133	1116		1118	1116	1117	1124	1110	1117		1092	1106	1105	1110	1109	1104.4
60	1166	1153	1155	1152	1153	1155.8		1125	1147	1154	1147	1165	1147.6		1099	1135	1124	1140	1141	1127.8		1136	1147	1117	1129	1114	1128.6		1131	1128	1104	1101	1135	1119.8		1118	1116	1117	1124	1110	1117		1092	1106	1105	1110	1109	1104.4
61	1170	1155	1158	1154	1155	1158.4		1125	1147	1154	1147	1165	1147.6		1099	1135	1124	1140	1141	1127.8		1136	1147	1117	1129	1114	1128.6		1131	1128	1104	1101	1135	1119.8		1117	1116	1117	1124	1110	1116.8		1092	1106	1105	1110	1109	1104.4
62	1170	1154	1158	1154	1155	1158.2		1125	1147	1154	1147	1165	1147.6		1099	1135	1124	1140	1141	1127.8		1136	1147	1117	1129	1114	1128.6		1135	1129	1105	1101	1138	1121.6		1119	1119	1119	1125	1115	1119.4		1094	1107	1109	1111	1110	1106.2
63	1172	1155	1162	1156	1158	1160.6		1128	1152	1156	1154	1170	1152		1111	1140	1134	1152	1144	1136.2		1143	1149	1119	1135	1119	1133		1137	1131	1109	1102	1139	1123.6		1121	1121	1121	1126	1117	1121.2		1094	1107	1109	1111	1110	1106.2
64	1177	1161	1167	1161	1163	1165.8		1136	1157	1158	1162	1178	1158.2		1117	1143	1140	1155	1145	1140		1144	1151	1123	1137	1122	1135.4		1142	1132	1111	1104	1143	1126.4		1121	1121	1121	1126	1117	1121.2		1094	1107	1109	1111	1110	1106.2
65	1181	1163	1169	1162	1166	1168.2		1142	1164	1159	1167	1183	1163		1124	1153	1149	1165	1152	1148.6		1146	1159	1127	1143	1128	1140.6		1145	1133	1113	1107	1147	1129		1124	1124	1121	1126	1119	1122.8		1094	1107	1109	1111	1110	1106.2
66	1184	1169	1172	1167	1169	1172.2		1147	1171	1170	1174	1193	1171		1128	1163	1152	1169	1160	1154.4		1147	1163	1128	1145	1130	1142.6		1148	1136	1118	1109	1149	1132		1128	1124	1126	1128	1122	1125.6		1094	1107	1109	1111	1110	1106.2
67	1188	1171	1177	1172	1171	1175.8		1148	1174	1172	1175	1201	1174		1134	1165	1153	1171	1160	1156.6		1152	1165	1132	1145	1133	1145.4		1148	1136	1118	1109	1149	1132		1128	1124	1126	1128	1122	1125.6		1094	1107	1109	1111	1110	1106.2
68	1191	1178	1179	1173	1177	1179.6		1150	1179	1174	1181	1201	1177		1136	1169	1157	1172	1164	1159.6		1152	1167	1132	1150	1135	1147.2		1149	1139	1122	1113	1150	1134.6		1130	1126	1127	1128	1124	1127		1097	1109	1111	1113	1111	1108.2
69	1197	1185	1185	1186	1185	1187.6		1153	1181	1180	1188	1205	1181.4		1141	1173	1162	1177	1164	1163.4		1154	1172	1138	1152	1136	1150.4		1155	1145	1124	1121	1153	1139.6		1133	1130	1133	1133	1129	1131.6		1102	1112	1114	1122	1118	1113.6
70	1210	1194	1194	1196	1193	1197.4		1157	1185	1186	1191	1213	1186.4		1140	1173	1162	1177	1164	1163.2		1154	1172	1138	1152	1136	1150.4		1155	1145	1124	1121	1153	1139.6		1133	1130	1133	1133	1129	1131.6		1102	1112	1114	1122	1118	1113.6
71	1210	1194	1194	1196	1193	1197.4		1161	1186	1191	1194	1217	1189.8		1141	1176	1165	1178	1166	1165.2		1154	1171	1142	1155	1140	1152.4		1155	1145	1124	1121	1153	1139.6		1133	1130	1133	1133	1129	1131.6		1102	1112	1114	1122	1118	1113.6
72	1210	1194	1194	1196	1193	1197.4		1166	1187	1194	1196	1220	1192.6		1143	1176	1167	1181	1170	1167.4		1156	1173	1144	1159	1143	1155		1155	1145	1124	1121	1153	1139.6		1133	1130	1133	1133	1129	1131.6		1102	1112	1114	1122	1118	1113.6
73	1210	1194	1194	1195	1193	1197.2		1166	1187	1194	1196	1220	1192.6		1143	1176	1167	1181	1170	1167.4		1156	1173	1144	1159	1143	1155		1155	1145	1124	1121	1153	1139.6		1133	1130	1133	1133	1129	1131.6		1102	1112	1114	1122	1118	1113.6
74	1214	1201	1200	1201	1199	1203		1166	1188	1197	1198	1222	1194.2		1146	1179	1170	1186	1175	1171.2		1158	1176	1145	1163	1146	1157.6		1157	1150	1125	1124	1155	1142.2		1136	1131	1136	1134	1133	1134		1106	1114	1115	1126	1120	1116.2
75	1220	1205	1206	1206	1206	1208.6		1169	1191	1198	1200	1226	1196.8		1147	1181	1173	1188	1177	1173.2		1161	1178	1145	1165	1149	1159.6		1157	1150	1125	1124	1155	1142.2		1136	1131	1136	1134	1133	1134		1106	1114	1115	1126	1120	1116.2
76	1223	1207	1208	1212	1210	1212		1178	1196	1204	1204	1230	1202.4		1157	1192	1181	1196	1186	1182.4		1169	1185	1150	1175	1153	1166.4		1159	1153	1128	1126	1157	1144.6		1139	1134	1137	1136	1137	1136.6		1106	1114	1115	1126	1120	1116.2
77	1223	1207	1208	1212	1210	1212		1179	1200	1205	1206	1232	1204.4		1162	1198	1182	1199	1194	1187		1170	1195	1157	1175	1159	1171.2		1169	1157	1131	1129	1165	1150.2		1146	1137	1138	1141	1142	1140.8		1112	1121	1119	1131	1126	1121.8
78	1224	1216	1209	1216	1214	1215.8		1185	1201	1211	1214	1242	1210.6		1169	1202	1190	1204	1202	1193.4		1178	1200	1164	1182	1167	1178.2		1173	1161	1134	1136	1170	1154.8		1147	1139	1139	1146	1144	1143		1115	1123	1122	1135	1126	1124.2
79	1224	1215	1209	1216	1214	1215.6		1185	1201	1211	1214	1242	1210.6		1168	1202	1190	1204	1202	1193.2		1178	1200	1164	1182	1167	1178.2		1177	1161	1139	1137	1174	1157.6		1148	1141	1140	1148	1148	1145		1120	1125	1125	1139	1126	1127
80	1225	1215	1212	1219	1217	1217.6		1187	1208	1211	1218	1242	1213.2		1170	1204	1190	1207	1203	1194.8		1182	1205	1167	1187	1171	1182.4		1184	1166	1144	1142	1178	1162.8		1152	1145	1144	1152	1152	1149		1121	1131	1127	1145	1128	1130.4
81	1225	1215	1212	1219	1217	1217.6		1187	1212	1215	1220	1242	1215.2		1172	1206	1192	1209	1208	1197.4		1184	1211	1169	1190	1175	1185.8		1188	1172	1148	1145	1182	1167		1156	1148	1149	1158	1158	1153.8		1126	1132	1131	1148	1135	1134.4
82	1230	1219	1216	1224	1219	1221.6		1187	1212	1215	1220	1242	1215.2		1172	1206	1192	1209	1208	1197.4		1184	1211	1169	1190	1175	1185.8		1194	1174	1149	1147	1186	1170		1158	1150	1151	1160	1162	1156.2		1127	1134	1134	1151	1135	1136.2
83	1234	1222	1217	1228	1225	1225.2		1190	1220	1220	1225	1245	1220		1184	1210	1197	1214	1213	1203.6		1196	1213	1169	1196	1177	1190.2		1198	1180	1151	1149	1186	1172.8		1164	1153	1154	1162	1166	1159.8		1129	1134	1139	1151	1137	1138
84	1234	1222	1217	1228	1225	1225.2		1192	1223	1222	1229	1250	1223.2		1187	1220	1202	1216	1224	1209.8		1199	1219	1173	1203	1183	1195.4		1202	1190	1160	1155	1198	1181		1172	1159	1160	1169	1175	1167		1133	1136	1145	1152	1144	1142
85	1236	1224	1220	1231	1230	1228.2		1192	1226	1224	1230	1254	1225.2		1189	1223	1205	1221	1226	1212.8		1199	1220	1174	1204	1186	1196.6		1206	1193	1164	1157	1210	1186		1179	1163	1163	1174	1179	1171.6		1136	1142	1151	1155	1150	1146.8
86	1239	1227	1223	1233	1231	1230.6		1197	1229	1229	1232	1258	1229		1192	1225	1206	1224	1231	1215.6		1201	1224	1179	1206	1190	1200		1206	1193	1164	1157	1210	1186		1179	1163	1163	1174	1179	1171.6		1136	1142	1151	1155	1150	1146.8
87	1244	1230	1230	1237	1233	1234.8		1201	1232	1233	1240	1263	1233.8		1194	1231	1213	1230	1239	1221.4		1207	1235	1186	1212	1193	1206.6		1211	1196	1167	1163	1213	1190		1183	1170	1170	1179	1182	1176.8		1142	1145	1156	1164	1151	1151.6
88	1244	1230	1229	1236	1233	1234.4		1206	1233	1235	1241	1266	1236.2		1203	1233	1215	1231	1252	1226.8		1208	1235	1190	1213	1194	1208		1214	1198	1169	1164	1214	1191.8		1183	1170	1170	1179	1182	1176.8		1142	1145	1156	1164	1151	1151.6
89	1248	1237	1233	1239	1235	1238.4		1207	1234	1237	1244	1269	1238.2		1203	1234	1218	1232	1253	1228		1211	1239	1193	1216	1199	1211.6		1214	1198	1169	1164	1214	1191.8		1183	1170	1170	1179	1182	1176.8		1142	1145	1156	1164	1151	1151.6
90	1256	1243	1239	1243	1241	1244.4		1213	1239	1239	1249	1275	1243		1212	1240	1222	1235	1256	1233		1214	1241	1195	1217	1199	1213.2		1221	1201	1169	1168	1217	1195.2		1183	1170	1170	1179	1182	1176.8		1142	1145	1156	1164	1151	1151.6
91	1256	1243	1239	1243	1241	1244.4		1214	1241	1241	1249	1280	1245		1214	1240	1224	1238	1259	1235		1216	1244	1199	1218	1202	1215.8		1226	1207	1172	1173	1220	1199.6		1188	1172	1176	1182	1186	1180.8		1145	1150	1160	1164	1154	1154.6
92	1256	1243	1239	1242	1241	1244.2		1216	1246	1244	1251	1285	1248.4		1216	1244	1226	1243	1262	1238.2		1219	1244	1204	1219	1209	1219		1231	1212	1179	1174	1222	1203.6		1197	1178	1179	1190	1191	1187		1146	1155	1167	1168	1155	1158.2
93	1266	1249	1242	1251	1243	1250.2		1221	1248	1246	1252	1285	1250.4		1220	1247	1227	1245	1265	1240.8		1219	1245	1206	1222	1212	1220.8		1231	1212	1179	1174	1222	1203.6		1197	1178	1179	1190	1191	1187		1146	1155	1167	1168	1155	1158.2
94	1266	1249	1242	1251	1243	1250.2		1224	1258	1250	1257	1292	1256.2		1225	1251	1232	1259	1276	1248.6		1226	1255	1211	1226	1218	1227.2		1235	1215	1179	1173	1225	1205.4		1200	1179	1185	1192	1193	1189.8		1146	1155	1167	1168	1155	1158.2
95	1272	1257	1249	1261	1245	1256.8		1229	1266	1252	1265	1295	1261.4		1234	1260	1240	1266	1286	1257.2		1232	1262	1216	1233	1226	1233.8		1240	1218	1186	1180	1232	1211.2		1201	1185	1189	1193	1196	1192.8		1148	1159	1169	1172	1158	1161.2
96	1277	1258	1249	1265	1246	1259		1230	1269	1253	1267	1297	1263.2		1234	1263	1240	1267	1290	1258.8		1234	1264	1217	1238	1230	1236.6		1243	1224	1190	1181	1233	1214.2		1204	1187	1191	1196	1199	1195.4		1149	1159	1172	1174	1163	1163.4
97	1279	1265	1250	1266	1252	1262.4		1236	1273	1256	1268	1300	1266.6		1236	1270	1246	1274	1295	1264.2		1242	1265	1220	1239	1232	1239.6		1248	1228	1191	1181	1237	1217		1204	1187	1191	1196	1199	1195.4		1149	1159	1172	1174	1163	1163.4
98	1283	1266	1253	1270	1258	1266		1247	1283	1267	1274	1303	1274.8		1241	1274	1260	1280	1301	1271.2		1248	1270	1224	1242	1233	1243.4		1251	1232	1193	1192	1240	1221.6		1207	1190	1197	1199	1202	1199		1155	1163	1174	1175	1167	1166.8
99	1286	1271	1255	1272	1260	1268.8		1253	1291	1273	1279	1307	1280.6		1250	1281	1271	1295	1315	1282.4		1257	1287	1231	1254	1247	1255.2		1260	1241	1205	1198	1246	1230		1216	1199	1202	1206	1209	1206.4		1162	1165	1178	1184	1171	1172
100	1290	1273	1267	1279	1263	1274.4		1257	1296	1280	1281	1310	1284.8		1260	1286	1277	1301	1317	1288.2		1259	1292	1235	1256	1249	1258.2		1261	1244	1212	1198	1247	1232.4		1216	1199	1202	1206	1209	1206.4		1162	1165	1178	1184	1171	1172
101	1290	1277	1272	1280	1264	1276.6		1261	1299	1288	1289	1314	1290.2		1268	1287	1279	1305	1324	1292.6		1263	1298	1243	1259	1252	1263		1267	1246	1217	1201	1248	1235.8		1217	1205	1204	1210	1210	1209.2		1166	1165	1179	1187	1176	1174.6
102	1289	1276	1272	1280	1264	1276.2		1262	1302	1290	1291	1317	1292.4		1268	1289	1282	1307	1330	1295.2		1269	1300	1246	1262	1255	1266.4		1267	1246	1217	1201	1248	1235.8		1217	1205	1204	1210	1210	1209.2		1166	1165	1179	1187	1176	1174.6
103	1294	1284	1280	1287	1268	1282.6		1272	1308	1295	1293	1319	1297.4		1268	1294	1285	1309	1332	1297.6		1273	1310	1247	1267	1259	1271.2		1271	1248	1223	1204	1256	1240.4		1224	1210	1210	1216	1221	1216.2		1170	1171	1187	1197	1187	1182.4
104	1294	1284	1280	1287	1267	1282.4		1275	1308	1295	1298	1319	1299		1274	1298	1288	1311	1336	1301.4		1275	1316	1251	1268	1262	1274.4		1274	1252	1226	1209	1261	1244.4		1225	1211	1211	1218	1224	1217.8		1172	1172	1190	1199	1189	1184.4
105	1299	1287	1287	1289	1271	1286.6		1279	1312	1297	1300	1321	1301.8		1273	1298	1287	1311	1336	1301		1275	1316	1251	1268	1262	1274.4		1274	1252	1226	1209	1261	1244.4		1225	1211	1211	1218	1224	1217.8		1172	1172	1190	1199	1189	1184.4
106	1302	1294	1293	1297	1278	1292.8		1294	1315	1307	1313	1330	1311.8		1283	1306	1299	1321	1353	1312.4		1281	1327	1261	1277	1266	1282.4		1278	1263	1234	1217	1267	1251.8		1230	1212	1213	1223	1227	1221		1177	1176	1195	1207	1194	1189.8
107	1302	1294	1293	1297	1277	1292.6		1295	1320	1310	1315	1338	1315.6		1297	1320	1316	1331	1362	1325.2		1288	1333	1264	1288	1273	1289.2		1284	1270	1237	1223	1271	1257		1232	1217	1217	1226	1230	1224.4		1177	1176	1195	1207	1194	1189.8
108	1307	1297	1296	1305	1287	1298.4		1297	1322	1314	1315	1340	1317.6		1297	1320	1316	1331	1362	1325.2		1288	1333	1264	1288	1273	1289.2		1284	1270	1237	1223	1271	1257		1232	1217	1217	1226	1230	1224.4		1177	1176	1195	1207	1194	1189.8
109	1311	1299	1302	1315	1292	1303.8		1304	1327	1322	1319	1344	1323.2		1299	1327	1320	1335	1370	1330.2		1294	1339	1268	1293	1281	1295		1294	1287	1242	1233	1283	1267.8		1243	1235	1233	1233	1239	1236.6		1187	1193	1208	1217	1212	1203.4
110	1311	1299	1305	1316	1295	1305.2		1309	1332	1325	1327	1349	1328.4		1302	1331	1326	1342	1375	1335.2		1297	1344	1269	1300	1285	1299		1295	1288	1248	1235	1285	1270.2		1247	1236	1233	1235	1242	1238.6		1191	1197	1209	1219	1214	1206
111	1310	1299	1304	1316	1295	1304.8		1312	1336	1326	1330	1352	1331.2		1305	1334	1327	1346	1382	1338.8		1298	1346	1269	1300	1285	1299.6		1301	1291	1252	1239	1291	1274.8		1252	1242	1239	1239	1247	1243.8		1197	1199	1217	1222	1220	1211
112	1310	1299	1304	1316	1294	1304.6		1320	1345	1336	1338	1363	1340.4		1319	1347	1346	1360	1386	1351.6		1305	1364	1278	1309	1296	1310.4		1309	1297	1254	1245	1296	1280.2		1255	1244	1241	1241	1248	1245.8		1197	1199	1217	1222	1220	1211
113	1310	1299	1304	1316	1294	1304.6		1321	1346	1337	1342	1366	1342.4		1320	1348	1346	1363	1387	1352.8		1306	1369	1282	1310	1297	1312.8		1309	1297	1254	1245	1296	1280.2		1255	1244	1241	1241	1248	1245.8		1197	1199	1217	1222	1220	1211
114	1310	1299	1304	1316	1294	1304.6		1325	1347	1338	1343	1367	1344		1326	1353	1353	1369	1391	1358.4		1311	1373	1290	1315	1302	1318.2		1310	1302	1258	1250	1296	1283.2		1257	1244	1242	1242	1251	1247.2		1200	1201	1219	1224	1221	1213
115	1314	1305	1312	1317	1302	1310		1329	1353	1345	1346	1378	1350.2		1332	1360	1360	1377	1395	1364.8		1314	1375	1291	1319	1303	1320.4		1314	1304	1265	1252	1299	1286.8		1257	1244	1242	1242	1251	1247.2		1200	1201	1219	1224	1221	1213
116	1314	1305	1312	1317	1302	1310		1330	1354	1351	1348	1381	1352.8		1337	1366	1362	1378	1396	1367.8		1317	1378	1292	1320	1304	1322.2		1314	1304	1265	1252	1299	1286.8		1257	1244	1242	1242	1251	1247.2		1200	1201	1219	1224	1221	1213
117	1318	1308	1319	1322	1303	1314		1338	1362	1356	1352	1387	1359		1342	1370	1363	1383	1401	1371.8		1317	1381	1294	1322	1306	1324		1314	1308	1269	1254	1299	1288.8		1256	1244	1241	1242	1251	1246.8		1200	1201	1219	1224	1221	1213
118	1317	1308	1318	1321	1303	1313.4		1338	1362	1356	1352	1387	1359		1342	1370	1363	1383	1401	1371.8		1319	1384	1296	1325	1310	1326.8		1315	1310	1273	1257	1300	1291		1257	1249	1245	1244	1254	1249.8		1206	1207	1226	1228	1223	1218
119	1328	1319	1324	1330	1318	1323.8		1349	1366	1364	1359	1394	1366.4		1352	1377	1369	1390	1404	1378.4		1324	1387	1300	1334	1317	1332.4		1321	1316	1276	1263	1309	1297		1259	1253	1246	1246	1255	1251.8		1210	1207	1228	1231	1227	1220.6
120	1335	1325	1328	1335	1320	1328.6		1348	1369	1367	1363	1395	1368.4		1355	1381	1370	1392	1405	1380.6		1325	1390	1304	1335	1319	1334.6		1324	1321	1280	1271	1316	1302.4		1266	1257	1249	1252	1259	1256.6		1217	1212	1232	1238	1235	1226.8
121	1352	1336	1336	1346	1334	1340.8		1355	1377	1374	1368	1403	1375.4		1366	1383	1373	1393	1409	1384.8		1329	1394	1307	1338	1321	1337.8		1328	1323	1282	1273	1317	1304.6		1266	1257	1249	1252	1259	1256.6		1217	1212	1232	1238	1235	1226.8
122	1353	1338	1338	1350	1335	1342.8		1361	1385	1381	1374	1409	1382		1376	1395	1382	1397	1417	1393.4		1331	1399	1316	1348	1332	1345.2		1335	1326	1283	1281	1323	1309.6		1272	1265	1256	1258	1261	1262.4		1221	1215	1234	1243	1242	1231
123	1354	1340	1340	1354	1336	1344.8		1364	1390	1385	1377	1412	1385.6		1380	1401	1387	1406	1418	1398.4		1335	1404	1328	1354	1336	1351.4		1338	1332	1284	1283	1327	1312.8		1275	1267	1258	1260	1262	1264.4		1223	1218	1237	1245	1245	1233.6
124	1357	1342	1343	1356	1338	1347.2		1371	1395	1392	1385	1418	1392.2		1390	1419	1398	1419	1431	1411.4		1345	1413	1338	1363	1344	1360.6		1342	1341	1292	1293	1330	1319.6		1276	1268	1263	1263	1263	1266.6		1223	1218	1237	1245	1245	1233.6
125	1362	1352	1347	1364	1342	1353.4		1380	1400	1395	1392	1426	1398.6		1403	1427	1409	1428	1446	1422.6		1356	1420	1345	1372	1349	1368.4		1351	1347	1294	1296	1340	1325.6		1282	1275	1267	1272	1268	1272.8		1229	1220	1238	1252	1251	1238
126	1366	1359	1348	1367	1356	1359.2		1384	1414	1402	1409	1439	1409.6		1426	1442	1429	1443	1471	1442.2		1369	1428	1362	1395	1362	1383.2		1363	1352	1309	1305	1355	1336.8		1289	1279	1272	1274	1277	1278.2		1233	1220	1241	1254	1254	1240.4
127	1369	1368	1354	1374	1358	1364.6		1384	1414	1403	1415	1441	1411.4		1428	1446	1430	1444	1471	1443.8		1369	1430	1363	1399	1363	1384.8		1363	1352	1309	1305	1355	1336.8		1289	1279	1272	1274	1277	1278.2		1233	1220	1241	1254	1254	1240.4
128	1374	1375	1357	1380	1362	1369.6		1386	1417	1405	1418	1443	1413.8		1428	1445	1430	1444	1471	1443.6		1373	1432	1366	1400	1365	1387.2		1364	1353	1310	1307	1359	1338.6		1295	1283	1274	1280	1280	1282.4		1239	1226	1242	1261	1258	1245.2
129	1378	1377	1367	1387	1362	1374.2		1391	1424	1413	1429	1448	1421		1438	1451	1442	1448	1480	1451.8		1378	1438	1371	1404	1370	1392.2		1368	1359	1314	1313	1362	1343.2		1297	1285	1279	1282	1283	1285.2		1241	1229	1247	1264	1260	1248.2
130	1382	1382	1371	1390	1365	1378		1402	1431	1424	1433	1457	1429.4		1449	1458	1451	1461	1489	1461.6		1385	1446	1381	1410	1378	1400		1373	1366	1315	1314	1364	1346.4		1299	1287	1282	1287	1285	1288		1241	1229	1248	1264	1260	1248.4
131	1384	1388	1378	1396	1375	1384.2		1410	1438	1438	1442	1463	1438.2		1457	1466	1459	1466	1497	1469		1391	1450	1385	1417	1387	1406		1380	1375	1321	1322	1369	1353.4		1302	1289	1284	1289	1287	1290.2		1243	1236	1252	1266	1266	1252.6
132	1396	1402	1386	1406	1384	1394.8		1415	1444	1446	1454	1471	1446		1465	1470	1465	1471	1500	1474.2		1398	1456	1390	1424	1394	1412.4		1384	1377	1324	1325	1372	1356.4		1307	1289	1285	1293	1287	1292.2		1245	1238	1256	1268	1269	1255.2
133	1406	1410	1396	1417	1390	1403.8		1423	1449	1459	1471	1486	1457.6		1479	1478	1485	1482	1517	1488.2		1409	1473	1399	1431	1402	1422.8		1388	1380	1337	1330	1378	1362.6		1309	1290	1287	1295	1288	1293.8		1245	1238	1257	1269	1269	1255.6
134	1410	1415	1404	1423	1407	1411.8		1429	1461	1470	1479	1491	1466		1495	1490	1499	1496	1525	1501		1423	1482	1408	1446	1413	1434.4		1392	1389	1343	1340	1390	1370.8		1312	1296	1291	1300	1296	1299		1246	1240	1258	1273	1274	1258.2
135	1417	1428	1416	1433	1418	1422.4		1436	1471	1477	1482	1501	1473.4		1501	1496	1506	1505	1533	1508.2		1428	1484	1417	1452	1420	1440.2		1394	1396	1347	1347	1394	1375.6		1318	1306	1295	1305	1300	1304.8		1254	1245	1259	1276	1280	1262.8
136	1424	1432	1421	1435	1425	1427.4		1439	1480	1482	1489	1506	1479.2		1507	1501	1514	1509	1537	1513.6		1435	1489	1421	1459	1427	1446.2		1398	1396	1348	1354	1398	1378.8		1320	1307	1295	1309	1301	1306.4		1256	1248	1264	1280	1283	1266.2
137	1429	1435	1427	1436	1431	1431.6		1445	1481	1483	1490	1508	1481.4		1512	1502	1514	1512	1540	1516		1435	1491	1426	1463	1429	1448.8		1398	1396	1348	1354	1398	1378.8		1321	1308	1296	1309	1301	1307		1256	1248	1264	1280	1284	1266.4
138	1429	1434	1427	1436	1431	1431.4		1452	1481	1489	1498	1512	1486.4		1519	1505	1515	1516	1548	1520.6		1442	1497	1437	1469	1433	1455.6		1403	1402	1358	1360	1401	1384.8		1325	1313	1298	1311	1304	1310.2		1259	1252	1268	1283	1287	1269.8
139	1431	1436	1425	1439	1433	1432.8		1457	1482	1491	1502	1519	1490.2		1524	1509	1520	1517	1554	1524.8		1453	1499	1446	1473	1437	1461.6		1405	1408	1365	1364	1405	1389.4		1326	1320	1301	1319	1312	1315.6		1267	1257	1276	1292	1298	1278
140	1434	1438	1429	1445	1436	1436.4		1460	1489	1494	1507	1521	1494.2		1528	1515	1521	1521	1560	1529		1456	1504	1446	1474	1438	1463.6		1405	1415	1367	1366	1407	1392		1327	1321	1302	1320	1313	1316.6		1269	1259	1280	1294	1302	1280.8
141	1437	1439	1432	1448	1437	1438.6		1463	1491	1501	1511	1528	1498.8		1534	1522	1529	1532	1565	1536.4		1463	1508	1452	1479	1442	1468.8		1411	1422	1373	1370	1414	1398		1328	1324	1305	1325	1313	1319		1272	1261	1283	1298	1302	1283.2
142	1442	1445	1437	1456	1441	1444.2		1470	1500	1504	1516	1532	1504.4		1542	1527	1536	1540	1575	1544		1472	1516	1457	1491	1452	1477.6		1418	1428	1383	1377	1417	1404.6		1336	1331	1313	1334	1321	1327		1279	1265	1294	1310	1312	1292
143	1448	1451	1443	1464	1449	1451		1478	1512	1515	1524	1545	1514.8		1560	1546	1551	1560	1596	1562.6		1483	1526	1467	1507	1462	1489		1428	1436	1386	1383	1423	1411.2		1337	1333	1319	1339	1325	1330.6		1283	1266	1296	1315	1315	1295
144	1455	1458	1448	1469	1457	1457.4		1486	1521	1517	1534	1556	1522.8		1567	1554	1566	1568	1605	1572		1487	1529	1475	1513	1465	1493.8		1433	1444	1390	1386	1425	1415.6		1340	1338	1321	1341	1326	1333.2		1288	1272	1298	1318	1315	1298.2
145	1455	1458	1449	1469	1456	1457.4		1491	1527	1518	1535	1558	1525.8		1569	1560	1569	1571	1609	1575.6		1489	1532	1480	1516	1469	1497.2		1436	1448	1395	1394	1430	1420.6		1342	1344	1321	1347	1335	1337.8		1295	1276	1308	1321	1320	1304
146	1456	1464	1456	1472	1459	1461.4		1496	1528	1522	1538	1566	1530		1574	1571	1575	1581	1619	1584		1492	1539	1483	1521	1475	1502		1441	1459	1403	1400	1434	1427.4		1346	1348	1321	1349	1336	1340		1299	1279	1311	1321	1321	1306.2
147	1456	1465	1456	1472	1459	1461.6		1500	1530	1524	1545	1571	1534		1578	1576	1580	1584	1620	1587.6		1500	1542	1488	1525	1477	1506.4		1442	1463	1405	1405	1438	1430.6		1351	1352	1323	1351	1338	1343		1299	1283	1312	1321	1322	1307.4
148	1457	1470	1463	1473	1460	1464.6		1501	1530	1524	1544	1571	1534		1578	1578	1580	1588	1620	1588.8		1500	1543	1490	1527	1478	1507.6		1446	1465	1406	1406	1442	1433		1352	1356	1324	1355	1341	1345.6		1302	1286	1315	1328	1325	1311.2
149	1459	1472	1466	1476	1463	1467.2		1505	1536	1531	1556	1583	1542.2		1599	1592	1585	1606	1633	1603		1517	1554	1501	1540	1490	1520.4		1449	1472	1415	1407	1448	1438.2		1362	1362	1334	1363	1351	1354.4		1309	1288	1321	1332	1327	1315.4
150	1459	1474	1466	1477	1461	1467.4		1508	1539	1533	1559	1586	1545		1607	1597	1590	1613	1642	1609.8		1526	1564	1507	1548	1499	1528.8		1458	1478	1424	1412	1456	1445.6		1371	1379	1349	1380	1362	1368.2		1316	1297	1331	1342	1333	1323.8
151	1461	1479	1469	1481	1467	1471.4		1520	1546	1539	1562	1592	1551.8		1611	1601	1595	1619	1649	1615		1530	1569	1510	1551	1507	1533.4		1459	1480	1427	1418	1461	1449		1372	1380	1349	1381	1362	1368.8		1317	1298	1331	1342	1334	1324.4
152	1466	1484	1473	1487	1471	1476.2		1527	1549	1543	1566	1593	1555.6		1611	1601	1595	1619	1649	1615		1536	1570	1513	1553	1512	1536.8		1461	1488	1429	1427	1466	1454.2		1377	1383	1357	1385	1368	1374		1322	1308	1341	1349	1339	1331.8
153	1469	1489	1477	1487	1478	1480		1533	1551	1544	1571	1595	1558.8		1613	1608	1601	1623	1655	1620		1543	1580	1518	1558	1519	1543.6		1467	1490	1435	1430	1471	1458.6		1389	1393	1367	1392	1375	1383.2		1325	1316	1346	1356	1341	1336.8
154	1478	1505	1487	1498	1484	1490.4		1539	1556	1547	1576	1607	1565		1615	1612	1604	1625	1663	1623.8		1552	1588	1522	1564	1529	1551		1472	1494	1438	1438	1473	1463		1396	1398	1375	1404	1387	1392		1328	1327	1354	1365	1351	1345
155	1483	1509	1487	1501	1486	1493.2		1539	1555	1546	1576	1607	1564.6		1617	1612	1604	1625	1664	1624.4		1556	1590	1525	1570	1538	1555.8		1476	1495	1441	1439	1474	1465		1402	1405	1377	1411	1390	1397		1329	1333	1360	1369	1360	1350.2
156	1491	1522	1501	1513	1494	1504.2		1550	1563	1551	1582	1616	1572.4		1625	1618	1612	1631	1668	1630.8		1567	1598	1534	1574	1544	1563.4		1484	1502	1448	1447	1483	1472.8		1409	1413	1388	1419	1397	1405.2		1335	1339	1369	1376	1362	1356.2
157	1502	1532	1510	1519	1503	1513.2		1553	1567	1557	1587	1617	1576.2		1635	1626	1616	1636	1674	1637.4		1573	1606	1540	1578	1555	1570.4		1488	1504	1452	1451	1485	1476		1410	1417	1389	1420	1398	1406.8		1338	1341	1370	1383	1368	1360
158	1502	1534	1510	1519	1504	1513.8		1553	1569	1558	1591	1620	1578.2		1642	1628	1621	1642	1679	1642.4		1580	1616	1554	1591	1559	1580		1495	1512	1458	1466	1497	1485.6		1418	1426	1402	1436	1412	1418.8		1356	1349	1381	1398	1382	1373.2
159	1505	1539	1516	1523	1511	1518.8		1558	1573	1559	1592	1623	1581		1643	1629	1622	1643	1681	1643.6		1581	1619	1560	1596	1560	1583.2		1506	1518	1459	1469	1502	1490.8		1425	1431	1407	1441	1417	1424.2		1362	1355	1391	1408	1390	1381.2
160	1509	1539	1519	1526	1514	1521.4		1562	1577	1563	1600	1628	1586		1646	1630	1624	1644	1687	1646.2		1583	1622	1564	1598	1567	1586.8		1512	1526	1468	1473	1507	1497.2		1425	1436	1412	1445	1423	1428.2		1368	1361	1394	1413	1391	1385.4
161	1510	1546	1524	1534	1518	1526.4		1564	1577	1570	1605	1636	1590.4		1646	1630	1625	1644	1687	1646.4		1583	1622	1564	1598	1568	1587		1515	1528	1473	1481	1512	1501.8		1426	1438	1421	1448	1427	1432		1372	1363	1397	1414	1393	1387.8
162	1521	1565	1534	1546	1533	1539.8		1569	1582	1577	1612	1640	1596		1646	1631	1624	1644	1689	1646.8		1587	1623	1568	1606	1572	1591.2		1518	1534	1480	1483	1518	1506.6		1432	1442	1430	1454	1439	1439.4		1387	1373	1405	1429	1400	1398.8
163	1523	1568	1536	1549	1538	1542.8		1576	1586	1579	1614	1644	1599.8		1652	1633	1639	1653	1696	1654.6		1598	1630	1578	1616	1579	1600.2		1520	1540	1483	1494	1520	1511.4		1438	1445	1432	1460	1442	1443.4		1393	1376	1413	1431	1405	1403.6
164	1523	1569	1537	1552	1540	1544.2		1580	1591	1583	1618	1654	1605.2		1668	1643	1648	1667	1698	1664.8		1604	1631	1587	1623	1585	1606		1525	1547	1485	1499	1523	1515.8		1444	1445	1436	1462	1444	1446.2		1394	1376	1413	1431	1406	1404
165	1532	1578	1545	1562	1545	1552.4		1585	1593	1587	1623	1659	1609.4		1671	1648	1651	1671	1701	1668.4		1606	1631	1590	1625	1588	1608		1529	1550	1490	1500	1525	1518.8		1446	1447	1437	1467	1447	1448.8		1399	1382	1415	1433	1406	1407
166	1535	1578	1547	1563	1548	1554.2		1591	1597	1590	1631	1663	1614.4		1684	1664	1662	1685	1712	1681.4		1619	1645	1606	1636	1600	1621.2		1539	1556	1505	1512	1533	1529		1456	1454	1449	1482	1454	1459		1406	1392	1425	1446	1418	1417.4
167	1537	1582	1551	1565	1549	1556.8		1591	1599	1594	1633	1664	1616.2		1686	1666	1662	1685	1713	1682.4		1622	1647	1610	1636	1606	1624.2		1542	1561	1509	1514	1540	1533.2		1461	1463	1455	1487	1457	1464.6		1408	1398	1427	1454	1426	1422.6
168	1548	1591	1561	1585	1561	1569.2		1597	1610	1599	1645	1674	1625		1687	1667	1663	1687	1713	1683.4		1625	1650	1612	1636	1611	1626.8		1546	1566	1512	1518	1545	1537.4		1468	1468	1461	1492	1463	1470.4		1412	1404	1431	1459	1435	1428.2
169	1553	1595	1565	1590	1565	1573.6		1601	1614	1600	1643	1676	1626.8		1691	1668	1664	1692	1714	1685.8		1630	1660	1617	1642	1616	1633		1556	1571	1515	1521	1558	1544.2		1471	1480	1468	1496	1470	1477		1417	1413	1441	1473	1443	1437.4
170	1556	1596	1567	1590	1567	1575.2		1606	1616	1603	1649	1678	1630.4		1693	1675	1667	1699	1717	1690.2		1635	1666	1622	1644	1620	1637.4		1563	1583	1516	1525	1561	1549.6		1474	1489	1471	1498	1476	1481.6		1420	1418	1442	1478	1445	1440.6
171	1558	1597	1571	1593	1568	1577.4		1613	1622	1609	1649	1682	1635		1695	1677	1669	1704	1721	1693.2		1636	1668	1627	1646	1627	1640.8		1571	1597	1525	1537	1566	1559.2		1479	1494	1477	1506	1485	1488.2		1428	1425	1447	1486	1452	1447.6
172	1568	1604	1582	1603	1581	1587.6		1617	1628	1621	1656	1691	1642.6		1703	1682	1672	1710	1725	1698.4		1641	1673	1632	1655	1635	1647.2		1580	1604	1530	1543	1573	1566		1486	1505	1484	1514	1493	1496.4		1434	1434	1454	1495	1455	1454.4
173	1568	1603	1584	1605	1584	1588.8		1624	1630	1623	1654	1691	1644.4		1703	1683	1674	1710	1725	1699		1645	1676	1636	1658	1639	1650.8		1583	1606	1534	1547	1578	1569.6		1493	1509	1487	1518	1498	1501		1439	1442	1457	1501	1461	1460
174	1572	1605	1586	1605	1586	1590.8		1626	1635	1634	1665	1698	1651.6		1715	1695	1692	1723	1743	1713.6		1659	1686	1644	1671	1650	1662		1591	1618	1544	1553	1592	1579.6		1496	1517	1498	1520	1504	1507		1440	1443	1457	1504	1462	1461.2
175	1575	1606	1588	1606	1588	1592.6		1634	1636	1640	1671	1702	1656.6		1720	1703	1698	1726	1749	1719.2		1662	1693	1650	1679	1658	1668.4		1597	1625	1551	1562	1596	1586.2		1505	1521	1508	1528	1514	1515.2		1447	1449	1466	1512	1469	1468.6
176	1575	1608	1589	1607	1591	1594		1637	1640	1649	1683	1706	1663		1724	1711	1702	1728	1754	1723.8		1665	1699	1651	1685	1665	1673		1607	1628	1556	1572	1604	1593.4		1514	1530	1513	1534	1521	1522.4		1456	1455	1474	1518	1480	1476.6
177	1584	1612	1591	1612	1595	1598.8		1640	1641	1649	1685	1708	1664.6		1726	1712	1704	1734	1755	1726.2		1667	1704	1654	1686	1670	1676.2		1610	1630	1560	1576	1606	1596.4		1519	1536	1519	1542	1529	1529		1457	1461	1478	1522	1482	1480
178	1592	1621	1595	1622	1605	1607		1643	1643	1656	1690	1711	1668.6		1728	1714	1708	1735	1758	1728.6		1671	1709	1658	1691	1676	1681		1611	1631	1561	1576	1606	1597		1520	1537	1523	1542	1529	1530.2		1459	1461	1480	1523	1483	1481.2
179	1595	1624	1601	1627	1607	1610.8		1651	1646	1663	1694	1725	1675.8		1740	1724	1719	1746	1770	1739.8		1680	1718	1666	1701	1688	1690.6		1618	1638	1566	1584	1616	1604.4		1535	1548	1531	1548	1536	1539.6		1466	1469	1484	1525	1487	1486.2
180	1601	1628	1605	1630	1615	1615.8		1651	1648	1663	1697	1726	1677		1744	1726	1720	1747	1773	1742		1682	1724	1670	1708	1689	1694.6		1623	1646	1574	1590	1622	1611		1546	1558	1541	1558	1545	1549.6		1480	1481	1494	1532	1496	1496.6
181	1610	1630	1612	1636	1617	1621		1653	1648	1666	1700	1728	1679		1746	1726	1727	1750	1773	1744.4		1683	1728	1671	1710	1689	1696.2		1626	1646	1579	1593	1629	1614.6		1550	1559	1545	1561	1550	1553		1483	1485	1500	1534	1497	1499.8
182	1613	1634	1620	1637	1622	1625.2		1666	1661	1674	1707	1735	1688.6		1751	1735	1737	1757	1774	1750.8		1689	1737	1675	1715	1690	1701.2		1627	1648	1579	1596	1630	1616		1551	1560	1545	1565	1551	1554.4		1483	1484	1500	1536	1497	1500
183	1628	1645	1641	1652	1638	1640.8		1678	1676	1683	1717	1750	1700.8		1760	1742	1743	1768	1782	1759		1701	1746	1683	1720	1695	1709		1632	1648	1585	1599	1634	1619.6		1560	1566	1545	1566	1555	1558.4		1487	1487	1507	1541	1504	1505.2
184	1634	1651	1647	1658	1644	1646.8		1681	1678	1686	1719	1754	1703.6		1760	1745	1746	1770	1784	1761		1707	1747	1683	1727	1698	1712.4		1638	1649	1589	1602	1637	1623		1566	1568	1549	1571	1556	1562		1493	1493	1507	1543	1506	1508.4
185	1640	1655	1655	1665	1647	1652.4		1684	1683	1690	1724	1758	1707.8		1762	1747	1749	1775	1787	1764		1709	1750	1688	1729	1698	1714.8		1646	1652	1594	1606	1637	1627		1572	1571	1551	1577	1563	1566.8		1496	1503	1509	1549	1511	1513.6
186	1646	1661	1661	1672	1650	1658		1685	1685	1693	1726	1764	1710.6		1761	1751	1749	1778	1789	1765.6		1715	1755	1700	1734	1705	1721.8		1649	1661	1601	1611	1649	1634.2		1580	1576	1560	1586	1572	1574.8		1507	1509	1520	1555	1524	1523
187	1653	1670	1668	1679	1662	1666.4		1687	1691	1699	1729	1771	1715.4		1766	1756	1759	1784	1792	1771.4		1717	1758	1709	1742	1710	1727.2		1653	1667	1613	1620	1649	1640.4		1584	1582	1570	1589	1578	1580.6		1517	1516	1526	1558	1532	1529.8
188	1653	1676	1669	1685	1664	1669.4		1689	1693	1700	1730	1777	1717.8		1767	1756	1762	1786	1795	1773.2		1722	1759	1711	1744	1713	1729.8		1661	1672	1616	1625	1651	1645		1586	1587	1579	1593	1577	1584.4		1521	1519	1526	1564	1536	1533.2
189	1654	1680	1674	1689	1670	1673.4		1695	1701	1708	1743	1785	1726.4		1774	1772	1778	1804	1805	1786.6		1734	1768	1721	1754	1722	1739.8		1670	1678	1623	1634	1667	1654.4		1591	1594	1585	1597	1581	1589.6		1523	1521	1530	1568	1537	1535.8
190	1662	1692	1687	1695	1678	1682.8		1702	1705	1712	1749	1789	1731.4		1779	1775	1782	1814	1812	1792.4		1739	1775	1728	1757	1727	1745.2		1676	1683	1630	1641	1679	1661.8		1597	1597	1591	1609	1586	1596		1528	1524	1539	1577	1540	1541.6
191	1666	1696	1693	1700	1685	1688		1706	1711	1722	1751	1795	1737		1783	1781	1786	1816	1818	1796.8		1742	1778	1731	1759	1732	1748.4		1683	1684	1635	1645	1681	1665.6		1602	1598	1594	1613	1590	1599.4		1533	1528	1546	1579	1544	1546
192	1669	1701	1696	1704	1688	1691.6		1709	1715	1724	1753	1799	1740		1789	1785	1791	1824	1828	1803.4		1747	1784	1737	1764	1738	1754		1687	1689	1638	1647	1681	1668.4		1602	1604	1595	1617	1592	1602		1534	1530	1546	1579	1545	1546.8
193	1673	1702	1696	1707	1689	1693.4		1714	1718	1729	1756	1800	1743.4		1790	1786	1795	1827	1829	1805.4		1750	1786	1738	1768	1739	1756.2		1694	1693	1644	1653	1685	1673.8		1606	1606	1601	1624	1597	1606.8		1539	1533	1548	1582	1547	1549.8
194	1679	1703	1698	1710	1689	1695.8		1718	1726	1739	1759	1809	1750.2		1792	1791	1803	1832	1835	1810.6		1755	1792	1748	1777	1744	1763.2		1704	1705	1654	1662	1701	1685.2		1612	1616	1610	1633	1608	1615.8		1552	1547	1556	1599	1559	1562.6
195	1682	1711	1706	1713	1698	1702		1723	1731	1741	1763	1812	1754		1795	1800	1805	1835	1835	1814		1758	1796	1752	1783	1745	1766.8		1710	1707	1660	1667	1705	1689.8		1622	1624	1618	1643	1617	1624.8		1563	1556	1560	1607	1566	1570.4
196	1689	1726	1713	1719	1703	1710		1735	1739	1747	1773	1815	1761.8		1800	1810	1814	1842	1845	1822.2		1762	1808	1760	1788	1751	1773.8		1716	1712	1662	1669	1711	1694		1629	1626	1622	1645	1617	1627.8		1566	1562	1562	1607	1571	1573.6
197	1693	1733	1725	1725	1707	1716.6		1736	1741	1750	1776	1818	1764.2		1800	1812	1818	1844	1846	1824		1764	1811	1765	1790	1754	1776.8		1718	1714	1667	1671	1714	1696.8		1630	1628	1626	1645	1618	1629.4		1566	1562	1565	1609	1571	1574.6
198	1694	1735	1730	1726	1706	1718.2		1739	1753	1756	1785	1823	1771.2		1805	1817	1825	1850	1851	1829.6		1765	1818	1770	1792	1757	1780.4		1720	1715	1669	1673	1718	1699		1631	1630	1628	1645	1618	1630.4		1567	1563	1565	1611	1570	1575.2
199	1702	1745	1742	1728	1714	1726.2		1744	1759	1763	1792	1824	1776.4		1809	1823	1829	1858	1852	1834.2		1776	1827	1777	1797	1762	1787.8		1721	1718	1671	1676	1721	1701.4		1636	1632	1629	1646	1619	1632.4		1569	1564	1565	1612	1573	1576.6
200	1709	1745	1745	1730	1717	1729.2		1745	1759	1769	1795	1827	1779		1809	1828	1832	1861	1855	1837		1778	1833	1777	1800	1766	1790.8		1722	1723	1673	1677	1724	1703.8		1636	1634	1631	1646	1623	1634		1570	1565	1565	1614	1576	1578
201	1711	1749	1747	1732	1722	1732.2		1747	1763	1773	1796	1830	1781.8		1812	1833	1834	1864	1857	1840		1779	1834	1781	1803	1769	1793.2		1725	1726	1676	1686	1732	1709		1643	1640	1632	1648	1628	1638.2		1572	1566	1569	1614	1580	1580.2
202	1719	1757	1755	1738	1725	1738.8		1754	1769	1778	1800	1841	1788.4		1816	1839	1837	1866	1870	1845.6		1783	1842	1785	1811	1779	1800		1733	1735	1680	1689	1736	1714.6		1646	1643	1635	1653	1635	1642.4		1580	1574	1568	1622	1583	1585.4
203	1722	1759	1759	1747	1728	1743		1757	1772	1783	1804	1847	1792.6		1820	1840	1839	1871	1871	1848.2		1784	1849	1787	1816	1781	1803.4		1735	1739	1680	1689	1738	1716.2		1647	1645	1640	1655	1635	1644.4		1581	1576	1570	1625	1583	1587
204	1726	1767	1765	1749	1735	1748.4		1761	1781	1791	1811	1854	1799.6		1825	1847	1842	1877	1877	1853.6		1795	1853	1793	1821	1786	1809.6		1741	1744	1686	1694	1741	1721.2		1652	1651	1645	1657	1637	1648.4		1584	1579	1574	1631	1592	1592
205	1734	1772	1770	1754	1738	1753.6		1768	1788	1792	1821	1860	1805.8		1830	1853	1856	1881	1880	1860		1797	1861	1801	1825	1788	1814.4		1748	1755	1692	1698	1746	1727.8		1653	1655	1651	1659	1639	1651.4		1592	1581	1577	1636	1595	1596.2
206	1738	1774	1775	1761	1743	1758.2		1769	1795	1795	1822	1862	1808.6		1831	1854	1859	1884	1883	1862.2		1803	1866	1802	1830	1791	1818.4		1757	1762	1694	1701	1752	1733.2		1654	1658	1658	1662	1640	1654.4		1595	1587	1579	1640	1603	1600.8
207	1744	1781	1778	1765	1752	1764		1771	1803	1798	1827	1865	1812.8		1832	1856	1859	1889	1883	1863.8		1807	1869	1803	1832	1794	1821		1760	1767	1700	1705	1757	1737.8		1657	1661	1660	1666	1647	1658.2		1598	1596	1584	1642	1607	1605.4
208	1750	1782	1778	1769	1755	1766.8		1774	1808	1800	1828	1871	1816.2		1834	1858	1862	1892	1888	1866.8		1810	1869	1804	1835	1795	1822.6		1760	1770	1708	1712	1760	1742		1662	1665	1664	1665	1651	1661.4		1601	1596	1587	1645	1610	1607.8
209	1756	1789	1781	1775	1759	1772		1787	1814	1805	1834	1878	1823.6		1841	1866	1872	1900	1897	1875.2		1815	1875	1805	1835	1798	1825.6		1768	1774	1712	1715	1767	1747.2		1666	1668	1668	1669	1651	1664.4		1603	1596	1589	1646	1613	1609.4
210	1762	1794	1787	1779	1767	1777.8		1788	1817	1811	1836	1878	1826		1845	1872	1876	1903	1897	1878.6		1817	1878	1807	1834	1803	1827.8		1771	1774	1712	1719	1770	1749.2		1667	1670	1672	1672	1653	1666.8		1605	1599	1591	1646	1615	1611.2
211	1764	1797	1790	1781	1771	1780.6		1794	1822	1814	1840	1881	1830.2		1846	1875	1876	1908	1897	1880.4		1825	1888	1817	1840	1809	1835.8		1779	1780	1716	1727	1784	1757.2		1672	1677	1676	1675	1664	1672.8		1611	1609	1601	1652	1627	1620
212	1768	1797	1791	1783	1775	1782.8		1796	1826	1819	1842	1887	1834		1849	1879	1880	1909	1899	1883.2		1826	1893	1822	1846	1811	1839.6		1779	1782	1717	1728	1790	1759.2		1672	1678	1678	1676	1668	1674.4		1612	1613	1602	1654	1629	1622
213	1770	1800	1790	1789	1777	1785.2		1801	1830	1825	1848	1893	1839.4		1851	1882	1881	1912	1906	1886.4		1830	1895	1822	1851	1814	1842.4		1786	1789	1720	1731	1797	1764.6		1678	1682	1681	1678	1675	1678.8		1622	1616	1603	1657	1632	1626
214	1775	1802	1792	1790	1784	1788.6		1805	1834	1828	1852	1897	1843.2		1852	1888	1886	1915	1909	1890		1835	1905	1829	1859	1825	1850.6		1791	1796	1730	1735	1797	1769.8		1686	1686	1690	1691	1680	1686.6		1629	1626	1605	1660	1640	1632
215	1783	1805	1795	1791	1794	1793.6		1808	1840	1832	1857	1904	1848.2		1854	1893	1888	1925	1915	1895		1842	1910	1834	1862	1829	1855.4		1797	1803	1737	1740	1798	1775		1690	1688	1695	1698	1683	1690.8		1634	1631	1610	1666	1644	1637
216	1789	1806	1797	1796	1795	1796.6		1815	1847	1837	1866	1912	1855.4		1860	1898	1897	1930	1920	1901		1847	1917	1839	1867	1830	1860		1801	1806	1740	1746	1803	1779.2		1696	1693	1696	1701	1689	1695		1642	1632	1615	1674	1647	1642
217	1795	1811	1802	1805	1797	1802		1815	1850	1839	1869	1915	1857.6		1864	1900	1902	1935	1923	1904.8		1850	1922	1842	1870	1831	1863		1801	1810	1742	1750	1805	1781.6		1699	1696	1697	1706	1691	1697.8		1642	1637	1618	1676	1648	1644.2
218	1796	1816	1806	1811	1802	1806.2		1822	1854	1840	1873	1920	1861.8		1865	1907	1904	1940	1926	1908.4		1854	1925	1844	1872	1837	1866.4		1805	1817	1749	1755	1807	1786.6		1704	1700	1701	1713	1694	1702.4		1645	1642	1620	1678	1649	1646.8
219	1807	1825	1813	1823	1815	1816.6		1834	1860	1845	1881	1929	1869.8		1870	1913	1910	1943	1931	1913.4		1861	1926	1849	1880	1840	1871.2		1814	1820	1756	1759	1814	1792.6		1711	1706	1709	1721	1697	1708.8		1646	1649	1627	1683	1652	1651.4
220	1817	1834	1820	1830	1820	1824.2		1838	1862	1847	1887	1934	1873.6		1874	1915	1912	1947	1939	1917.4		1864	1930	1854	1882	1842	1874.4		1821	1827	1758	1762	1818	1797.2		1710	1708	1714	1724	1698	1710.8		1651	1651	1636	1687	1653	1655.6
221	1821	1839	1826	1837	1824	1829.4		1843	1865	1851	1890	1941	1878		1876	1921	1916	1955	1941	1921.8		1864	1935	1854	1884	1845	1876.4		1824	1830	1759	1764	1821	1799.6		1715	1712	1716	1726	1700	1713.8		1654	1652	1637	1690	1656	1657.8
222	1822	1842	1830	1841	1828	1832.6		1844	1870	1855	1895	1948	1882.4		1882	1923	1919	1957	1946	1925.4		1866	1940	1855	1888	1846	1879		1826	1836	1768	1770	1826	1805.2		1724	1718	1718	1732	1704	1719.2		1657	1658	1646	1695	1661	1663.4
223	1834	1852	1834	1845	1834	1839.8		1855	1875	1864	1908	1955	1891.4		1884	1927	1922	1961	1950	1928.8		1870	1942	1859	1893	1852	1883.2		1832	1840	1771	1771	1831	1809		1726	1718	1720	1736	1707	1721.4		1660	1658	1647	1698	1664	1665.4
224	1842	1860	1844	1853	1841	1848		1861	1884	1870	1912	1963	1898		1887	1930	1923	1964	1956	1932		1873	1944	1866	1899	1858	1888		1834	1845	1773	1772	1834	1811.6		1726	1720	1722	1740	1710	1723.6		1661	1659	1649	1700	1665	1666.8
225	1847	1869	1855	1862	1847	1856		1864	1887	1875	1921	1970	1903.4		1890	1932	1927	1967	1957	1934.6		1877	1951	1870	1902	1860	1892		1838	1848	1773	1777	1836	1814.4		1730	1723	1725	1742	1712	1726.4		1664	1661	1651	1701	1667	1668.8
226	1854	1876	1862	1867	1859	1863.6		1867	1898	1880	1925	1974	1908.8		1897	1934	1929	1974	1962	1939.2		1882	1953	1873	1903	1861	1894.4		1841	1854	1775	1783	1839	1818.4		1732	1723	1729	1747	1717	1729.6		1667	1663	1652	1704	1669	1671
227	1859	1889	1864	1870	1870	1870.4		1874	1903	1890	1935	1978	1916		1903	1941	1933	1978	1964	1943.8		1887	1955	1874	1905	1863	1896.8		1842	1860	1775	1787	1843	1821.4		1734	1725	1730	1748	1721	1731.6		1668	1665	1652	1706	1669	1672
228	1866	1899	1878	1877	1884	1880.8		1877	1912	1896	1943	1984	1922.4		1908	1944	1944	1986	1969	1950.2		1892	1961	1879	1908	1869	1901.8		1846	1862	1777	1790	1852	1825.4		1736	1731	1739	1752	1722	1736		1670	1671	1659	1713	1673	1677.2
229	1877	1907	1884	1885	1885	1887.6		1880	1914	1899	1946	1990	1925.8		1911	1945	1945	1990	1970	1952.2		1899	1962	1887	1913	1874	1907		1849	1869	1783	1794	1859	1830.8		1746	1735	1748	1757	1727	1742.6		1675	1684	1664	1718	1680	1684.2
230	1882	1916	1888	1889	1892	1893.4		1887	1918	1905	1951	1992	1930.6		1916	1948	1948	1994	1974	1956		1904	1968	1894	1917	1879	1912.4		1858	1873	1787	1804	1865	1837.4		1753	1745	1755	1762	1734	1749.8		1689	1695	1671	1725	1690	1694
231	1886	1922	1897	1891	1895	1898.2		1891	1922	1908	1954	1999	1934.8		1920	1952	1951	2003	1973	1959.8		1910	1972	1897	1919	1884	1916.4		1861	1880	1787	1808	1867	1840.6		1755	1750	1759	1764	1737	1753		1689	1697	1673	1725	1694	1695.6
232	1892	1926	1900	1893	1899	1902		1897	1925	1917	1962	2008	1941.8		1929	1961	1957	2014	1986	1969.4		1919	1977	1907	1927	1899	1925.8		1865	1883	1788	1811	1869	1843.2		1760	1754	1764	1767	1740	1757		1690	1697	1675	1725	1696	1696.6
233	1895	1934	1902	1898	1904	1906.6		1904	1930	1921	1969	2017	1948.2		1934	1964	1959	2019	1990	1973.2		1923	1978	1911	1927	1904	1928.6		1868	1890	1794	1819	1871	1848.4		1767	1760	1770	1772	1744	1762.6		1694	1709	1681	1726	1700	1702
234	1900	1940	1906	1908	1913	1913.4		1906	1935	1927	1972	2023	1952.6		1935	1970	1972	2022	1996	1979		1928	1982	1914	1930	1905	1931.8		1875	1896	1800	1821	1879	1854.2		1774	1764	1771	1778	1753	1768		1700	1715	1689	1730	1707	1708.2
235	1904	1946	1911	1915	1917	1918.6		1909	1941	1932	1976	2028	1957.2		1938	1975	1973	2025	1999	1982		1931	1985	1915	1933	1908	1934.4		1882	1904	1804	1824	1889	1860.6		1777	1769	1771	1788	1758	1772.6		1702	1718	1693	1734	1717	1712.8
236	1914	1953	1921	1923	1928	1927.8		1911	1950	1940	1980	2037	1963.6		1942	1977	1977	2027	2006	1985.8		1936	1988	1914	1934	1910	1936.4		1886	1908	1807	1827	1891	1863.8		1777	1773	1772	1793	1761	1775.2		1705	1718	1694	1739	1719	1715
237	1921	1956	1927	1927	1935	1933.2		1916	1954	1941	1985	2041	1967.4		1945	1982	1988	2032	2012	1991.8		1939	1991	1917	1939	1914	1940		1893	1914	1815	1832	1900	1870.8		1780	1780	1779	1801	1768	1781.6		1708	1722	1700	1743	1725	1719.6
238	1927	1966	1934	1935	1937	1939.8		1922	1964	1950	1998	2046	1976		1953	1985	1993	2037	2019	1997.4		1945	1994	1924	1950	1918	1946.2		1904	1924	1823	1835	1910	1879.2		1792	1786	1790	1806	1775	1789.8		1714	1732	1709	1751	1732	1727.6
239	1933	1980	1939	1938	1948	1947.6		1927	1974	1957	2002	2054	1982.8		1966	1997	2002	2045	2035	2009		1953	2007	1933	1962	1925	1956		1907	1926	1827	1839	1918	1883.4		1795	1791	1794	1809	1782	1794.2		1723	1738	1712	1752	1735	1732
240	1939	1986	1942	1942	1958	1953.4		1936	1977	1959	2007	2058	1987.4		1973	2003	2005	2048	2036	2013		1961	2013	1941	1964	1933	1962.4		1913	1939	1832	1853	1928	1893		1804	1798	1805	1815	1798	1804		1736	1751	1723	1757	1742	1741.8
241	1945	1987	1948	1947	1964	1958.2		1940	1980	1963	2010	2063	1991.2		1975	2008	2009	2053	2041	2017.2		1964	2019	1944	1967	1937	1966.2		1920	1944	1835	1853	1931	1896.6		1809	1799	1810	1817	1801	1807.2		1737	1754	1726	1760	1745	1744.4
242	1950	1991	1951	1953	1968	1962.6		1943	1984	1973	2012	2074	1997.2		1979	2014	2012	2058	2049	2022.4		1971	2026	1951	1970	1940	1971.6		1925	1948	1841	1855	1933	1900.4		1813	1803	1813	1819	1805	1810.6		1742	1757	1730	1764	1748	1748.2
243	1953	1992	1953	1952	1974	1964.8		1949	1988	1978	2015	2079	2001.8		1986	2020	2013	2064	2054	2027.4		1982	2034	1956	1981	1947	1980		1933	1960	1844	1862	1945	1908.8		1821	1819	1823	1832	1813	1821.6		1752	1768	1744	1769	1759	1758.4
244	1959	2005	1970	1968	1982	1976.8		1957	1995	1982	2024	2082	2008		1993	2022	2017	2067	2057	2031.2		1987	2040	1959	1987	1949	1984.4		1935	1963	1849	1870	1952	1913.8		1823	1821	1829	1835	1814	1824.4		1754	1768	1748	1769	1760	1759.8
245	1971	2015	1979	1971	1988	1984.8		1962	1996	1985	2031	2086	2012		1994	2026	2024	2074	2066	2036.8		1992	2046	1967	1991	1954	1990		1937	1970	1853	1874	1954	1917.6		1824	1824	1835	1841	1816	1828		1758	1770	1753	1774	1764	1763.8
246	1978	2023	1982	1981	1993	1991.4		1963	2001	1992	2038	2092	2017.2		2002	2029	2031	2080	2072	2042.8		2000	2049	1969	1995	1958	1994.2		1941	1976	1858	1880	1962	1923.4		1831	1830	1841	1849	1818	1833.8		1762	1774	1760	1780	1775	1770.2
247	1982	2028	1983	1986	1998	1995.4		1966	2006	1994	2039	2098	2020.6		2004	2034	2036	2086	2077	2047.4		2004	2053	1975	1998	1959	1997.8		1944	1981	1861	1887	1965	1927.6		1834	1833	1842	1851	1820	1836		1762	1779	1761	1784	1782	1773.6
248	1986	2033	1987	1991	2003	2000		1973	2012	2005	2054	2106	2030		2015	2043	2044	2090	2087	2055.8		2014	2056	1980	2006	1967	2004.6		1948	1983	1868	1892	1967	1931.6		1837	1839	1849	1858	1821	1840.8		1766	1785	1762	1795	1792	1780
249	1991	2040	1988	1995	2007	2004.2		1979	2016	2012	2063	2113	2036.6		2022	2050	2054	2099	2097	2064.4		2023	2067	1984	2012	1972	2011.6		1954	1989	1869	1895	1974	1936.2		1842	1849	1852	1861	1829	1846.6		1772	1790	1772	1797	1796	1785.4
250	1998	2049	2000	2000	2018	2013		1982	2023	2017	2072	2116	2042		2033	2052	2058	2102	2099	2068.8		2030	2074	1987	2017	1979	2017.4		1964	1993	1879	1904	1986	1945.2		1853	1863	1861	1870	1841	1857.6		1781	1805	1782	1810	1810	1797.6
251	2004	2060	2008	2010	2024	2021.2		1998	2040	2032	2080	2133	2056.6		2046	2066	2067	2108	2107	2078.8		2046	2082	1996	2026	1984	2026.8		1975	2001	1890	1909	1993	1953.6		1863	1867	1870	1877	1846	1864.6		1785	1816	1788	1817	1820	1805.2
252	2011	2064	2016	2017	2027	2027		2005	2045	2041	2086	2141	2063.6		2055	2076	2071	2115	2113	2086		2046	2087	2000	2026	1989	2029.6		1980	2007	1894	1913	1998	1958.4		1863	1872	1873	1878	1854	1868		1786	1818	1791	1819	1825	1807.8
253	2027	2073	2023	2023	2033	2035.8		2013	2055	2048	2090	2142	2069.6		2061	2088	2077	2120	2122	2093.6		2049	2089	2008	2031	1993	2034		1984	2009	1895	1913	2000	1960.2		1866	1876	1876	1879	1857	1870.8		1786	1819	1793	1820	1830	1809.6
254	2033	2078	2028	2030	2040	2041.8		2021	2066	2058	2100	2158	2080.6		2064	2095	2087	2127	2131	2100.8		2058	2099	2019	2042	2004	2044.4		1992	2012	1899	1914	2003	1964		1869	1880	1881	1883	1864	1875.4		1790	1820	1796	1822	1831	1811.8
255	2038	2085	2033	2033	2045	2046.8		2027	2076	2063	2108	2164	2087.6		2071	2097	2091	2132	2140	2106.2		2060	2104	2028	2045	2006	2048.6		2002	2018	1906	1925	2007	1971.6		1873	1887	1883	1889	1870	1880.4		1794	1820	1802	1827	1836	1815.8
256	2040	2093	2039	2040	2056	2053.6		2030	2079	2065	2112	2169	2091		2071	2105	2098	2139	2152	2113		2066	2108	2031	2046	2011	2052.4		2006	2020	1912	1926	2010	1974.8		1876	1891	1883	1893	1873	1883.2		1800	1825	1802	1833	1836	1819.2
257	2049	2099	2056	2045	2061	2062		2032	2086	2074	2117	2181	2098		2077	2113	2109	2141	2154	2118.8		2067	2114	2033	2053	2016	2056.6		2011	2025	1913	1930	2016	1979		1879	1894	1889	1892	1876	1886		1804	1826	1805	1836	1837	1821.6
258	2063	2102	2064	2054	2070	2070.6		2037	2091	2080	2126	2190	2104.8		2081	2121	2118	2147	2165	2126.4		2074	2119	2042	2061	2024	2064		2017	2037	1920	1936	2021	1986.2		1887	1899	1899	1900	1882	1893.4		1816	1832	1811	1841	1847	1829.4
259	2067	2104	2066	2063	2073	2074.6		2044	2102	2089	2134	2198	2113.4		2088	2128	2130	2158	2175	2135.8		2084	2127	2047	2069	2031	2071.6		2023	2046	1923	1938	2025	1991		1889	1902	1899	1900	1888	1895.6		1818	1833	1815	1845	1850	1832.2
260	2077	2111	2069	2080	2083	2084		2053	2112	2095	2145	2205	2122		2096	2137	2138	2163	2183	2143.4		2091	2130	2052	2073	2035	2076.2		2030	2052	1925	1938	2032	1995.4		1897	1905	1905	1903	1895	1901		1819	1835	1816	1852	1853	1835
261	2081	2117	2084	2087	2092	2092.2		2055	2120	2101	2152	2213	2128.2		2099	2148	2147	2176	2189	2151.8		2096	2144	2054	2082	2037	2082.6		2034	2059	1933	1945	2034	2001		1902	1909	1910	1908	1903	1906.4		1822	1841	1824	1860	1858	1841
262	2092	2124	2091	2099	2095	2100.2		2059	2127	2107	2158	2219	2134		2103	2153	2156	2181	2196	2157.8		2105	2151	2058	2090	2046	2090		2038	2064	1936	1949	2036	2004.6		1907	1914	1910	1910	1909	1910		1823	1844	1824	1862	1861	1842.8
263	2094	2128	2104	2101	2099	2105.2		2066	2131	2116	2164	2226	2140.6		2111	2156	2159	2187	2202	2163		2110	2163	2062	2097	2050	2096.4		2044	2068	1941	1958	2045	2011.2		1912	1917	1914	1920	1918	1916.2		1835	1850	1827	1869	1869	1850
264	2099	2135	2108	2110	2103	2111		2079	2137	2124	2173	2235	2149.6		2123	2169	2173	2197	2213	2175		2115	2173	2071	2104	2062	2105		2051	2075	1947	1970	2048	2018.2		1918	1921	1919	1926	1924	1921.6		1836	1854	1838	1871	1874	1854.6
265	2103	2142	2113	2115	2105	2115.6		2085	2146	2125	2177	2242	2155		2125	2175	2181	2200	2218	2179.8		2117	2182	2077	2106	2065	2109.4		2056	2078	1954	1974	2055	2023.4		1921	1928	1922	1931	1926	1925.6		1838	1856	1843	1873	1876	1857.2
266	2106	2152	2117	2119	2112	2121.2		2090	2153	2133	2182	2247	2161		2131	2184	2188	2207	2230	2188		2127	2192	2086	2113	2075	2118.6		2060	2084	1956	1982	2058	2028		1933	1940	1933	1936	1933	1935		1844	1868	1850	1884	1887	1866.6
267	2113	2156	2121	2127	2120	2127.4		2096	2157	2135	2186	2255	2165.8		2140	2190	2193	2217	2233	2194.6		2138	2194	2093	2118	2079	2124.4		2065	2088	1969	1986	2064	2034.4		1936	1943	1941	1940	1941	1940.2		1845	1877	1855	1890	1890	1871.4
268	2120	2161	2127	2133	2123	2132.8		2101	2163	2140	2196	2260	2172		2143	2193	2197	2225	2247	2201		2146	2202	2105	2126	2086	2133		2076	2097	1977	1991	2072	2042.6		1945	1959	1948	1948	1949	1949.8		1850	1885	1860	1897	1899	1878.2
269	2129	2172	2140	2146	2128	2143		2106	2169	2148	2207	2267	2179.4		2149	2204	2202	2233	2251	2207.8		2152	2209	2117	2135	2093	2141.2		2076	2104	1983	1995	2076	2046.8		1947	1961	1950	1953	1950	1952.2		1853	1887	1861	1898	1903	1880.4
270	2136	2175	2145	2152	2133	2148.2		2118	2180	2152	2210	2273	2186.6		2155	2215	2202	2242	2255	2213.8		2158	2211	2123	2140	2100	2146.4		2079	2112	1989	1999	2081	2052		1951	1964	1953	1958	1954	1956		1862	1894	1867	1898	1906	1885.4
271	2146	2185	2151	2160	2138	2156		2121	2187	2159	2216	2278	2192.2		2161	2220	2209	2249	2264	2220.6		2168	2223	2129	2145	2110	2155		2088	2119	1996	2004	2087	2058.8		1954	1965	1953	1961	1957	1958		1866	1895	1872	1901	1910	1888.8
272	2156	2198	2155	2165	2153	2165.4		2124	2194	2166	2225	2285	2198.8		2165	2225	2221	2261	2273	2229		2174	2230	2134	2153	2118	2161.8		2101	2122	2002	2010	2091	2065.2		1957	1975	1959	1964	1960	1963		1870	1900	1883	1907	1914	1894.8
273	2163	2205	2155	2169	2161	2170.6		2132	2202	2169	2233	2286	2204.4		2175	2230	2229	2270	2278	2236.4		2179	2234	2139	2165	2133	2170		2108	2134	2011	2018	2104	2075		1965	1982	1962	1968	1968	1969		1873	1906	1890	1917	1918	1900.8
274	2169	2210	2161	2173	2166	2175.8		2139	2208	2178	2245	2294	2212.8		2186	2234	2232	2274	2286	2242.4		2184	2245	2141	2171	2137	2175.6		2113	2140	2016	2022	2108	2079.8		1972	1984	1969	1969	1973	1973.4		1874	1910	1893	1921	1919	1903.4
275	2175	2217	2165	2180	2172	2181.8		2145	2215	2184	2254	2307	2221		2202	2251	2248	2284	2294	2255.8		2191	2258	2150	2185	2149	2186.6		2119	2146	2022	2027	2112	2085.2		1974	1990	1969	1970	1975	1975.6		1877	1913	1895	1927	1921	1906.6
276	2180	2221	2171	2187	2179	2187.6		2154	2223	2196	2258	2313	2228.8		2209	2260	2259	2292	2304	2264.8		2197	2267	2158	2194	2149	2193		2123	2148	2030	2037	2120	2091.6		1977	1993	1973	1975	1979	1979.4		1878	1919	1898	1929	1922	1909.2
277	2182	2224	2175	2194	2181	2191.2		2160	2234	2206	2260	2320	2236		2215	2267	2272	2302	2313	2273.8		2203	2269	2164	2198	2157	2198.2		2127	2153	2035	2044	2132	2098.2		1989	2001	1985	1981	1984	1988		1882	1928	1904	1935	1930	1915.8
278	2191	2233	2180	2203	2191	2199.6		2164	2240	2211	2269	2327	2242.2		2224	2276	2282	2308	2316	2281.2		2211	2277	2179	2204	2166	2207.4		2133	2160	2037	2047	2140	2103.4		1997	2010	1995	1982	1989	1994.6		1888	1931	1904	1939	1932	1918.8
279	2201	2239	2187	2209	2197	2206.6		2174	2247	2226	2276	2338	2252.2		2230	2285	2290	2316	2323	2288.8		2219	2281	2188	2210	2172	2214		2138	2165	2039	2049	2147	2107.6		2005	2011	1999	1986	1995	1999.2		1892	1935	1908	1940	1938	1922.6
280	2206	2245	2193	2211	2202	2211.4		2177	2252	2228	2281	2345	2256.6		2237	2293	2294	2325	2333	2296.4		2226	2287	2196	2218	2177	2220.8		2142	2168	2042	2055	2152	2111.8		2013	2012	2003	1992	2000	2004		1899	1938	1909	1946	1944	1927.2
281	2214	2256	2200	2217	2209	2219.2		2198	2270	2237	2297	2351	2270.6		2248	2309	2310	2336	2339	2308.4		2237	2295	2208	2229	2188	2231.4		2146	2173	2053	2061	2164	2119.4		2022	2014	2016	2001	2003	2011.2		1906	1943	1917	1955	1953	1934.8
282	2219	2261	2207	2227	2219	2226.6		2203	2280	2239	2303	2355	2276		2257	2320	2319	2345	2349	2318		2242	2301	2210	2238	2194	2237		2149	2182	2057	2064	2169	2124.2		2025	2018	2019	2008	2009	2015.8		1910	1954	1920	1961	1955	1940
283	2226	2266	2215	2237	2224	2233.6		2215	2283	2247	2312	2363	2284		2266	2330	2327	2354	2363	2328		2245	2309	2220	2240	2203	2243.4		2154	2192	2064	2069	2174	2130.6		2028	2023	2024	2014	2012	2020.2		1916	1960	1920	1964	1963	1944.6
284	2231	2269	2221	2244	2231	2239.2		2225	2293	2256	2318	2366	2291.6		2276	2339	2342	2359	2377	2338.6		2252	2313	2226	2249	2209	2249.8		2161	2196	2070	2076	2177	2136		2034	2031	2031	2020	2017	2026.6		1917	1965	1923	1976	1968	1949.8
285	2241	2278	2225	2254	2235	2246.6		2231	2296	2270	2329	2371	2299.4		2283	2349	2349	2365	2387	2346.6		2257	2319	2240	2262	2216	2258.8		2168	2201	2075	2084	2185	2142.6		2040	2036	2040	2025	2024	2033		1924	1965	1926	1981	1971	1953.4
286	2245	2284	2231	2262	2239	2252.2		2240	2303	2275	2344	2378	2308		2295	2360	2356	2369	2396	2355.2		2262	2333	2249	2270	2223	2267.4		2177	2204	2081	2087	2189	2147.6		2043	2038	2041	2027	2029	2035.6		1925	1968	1929	1985	1977	1956.8
287	2253	2291	2239	2266	2242	2258.2		2250	2309	2281	2350	2387	2315.4		2304	2368	2364	2381	2402	2363.8		2270	2342	2256	2274	2228	2274		2181	2211	2086	2093	2196	2153.4		2054	2052	2050	2036	2040	2046.4		1933	1971	1933	1995	1983	1963
288	2255	2305	2245	2272	2244	2264.2		2261	2320	2298	2354	2395	2325.6		2311	2381	2373	2393	2413	2374.2		2275	2350	2265	2279	2236	2281		2195	2222	2095	2098	2203	2162.6		2067	2059	2057	2046	2044	2054.6		1938	1984	1941	2002	1997	1972.4
289	2269	2314	2256	2284	2254	2275.4		2275	2333	2310	2364	2405	2337.4		2322	2386	2386	2410	2426	2386		2279	2360	2275	2290	2247	2290.2		2202	2232	2105	2103	2206	2169.6		2073	2064	2060	2048	2049	2058.8		1938	1989	1945	2007	2003	1976.4
290	2281	2321	2262	2292	2270	2285.2		2285	2343	2318	2369	2413	2345.6		2331	2396	2390	2418	2438	2394.6		2294	2366	2286	2298	2252	2299.2		2206	2235	2113	2107	2216	2175.4		2081	2073	2060	2054	2050	2063.6		1940	1992	1950	2019	2010	1982.2
291	2287	2327	2269	2299	2274	2291.2		2292	2353	2330	2378	2421	2354.8		2336	2403	2402	2425	2446	2402.4		2306	2376	2289	2310	2263	2308.8		2218	2244	2123	2116	2219	2184		2089	2083	2064	2065	2055	2071.2		1941	1996	1952	2022	2013	1984.8
292	2293	2333	2278	2303	2279	2297.2		2300	2360	2339	2386	2430	2363		2346	2409	2410	2440	2455	2412		2314	2388	2301	2314	2273	2318		2225	2253	2130	2127	2224	2191.8		2103	2092	2072	2071	2058	2079.2		1947	2004	1958	2029	2020	1991.6
293	2297	2340	2289	2309	2285	2304		2304	2372	2349	2401	2439	2373		2356	2423	2426	2458	2465	2425.6		2323	2396	2306	2321	2279	2325		2241	2256	2134	2133	2235	2199.8		2113	2093	2077	2080	2065	2085.6		1951	2009	1965	2034	2023	1996.4
294	2298	2346	2293	2316	2296	2309.8		2310	2382	2352	2410	2444	2379.6		2369	2435	2439	2467	2480	2438		2331	2407	2314	2326	2288	2333.2		2252	2262	2138	2143	2247	2208.4		2122	2098	2085	2088	2071	2092.8		1955	2019	1972	2045	2029	2004
295	2314	2353	2309	2331	2313	2324		2324	2387	2359	2421	2449	2388		2377	2445	2445	2475	2489	2446.2		2341	2415	2318	2336	2296	2341.2		2260	2274	2146	2155	2252	2217.4		2126	2108	2099	2093	2080	2101.2		1960	2028	1978	2055	2035	2011.2
296	2320	2365	2320	2339	2319	2332.6		2338	2395	2377	2432	2452	2398.8		2384	2454	2455	2487	2502	2456.4		2350	2422	2323	2348	2301	2348.8		2269	2283	2155	2168	2257	2226.4		2130	2115	2103	2098	2087	2106.6		1964	2042	1988	2055	2040	2017.8
297	2328	2372	2327	2349	2327	2340.6		2340	2401	2385	2438	2460	2404.8		2395	2462	2464	2495	2509	2465		2364	2432	2334	2359	2311	2360		2273	2290	2165	2172	2268	2233.6		2139	2121	2109	2111	2095	2115		1967	2045	1992	2059	2041	2020.8
298	2340	2388	2332	2363	2334	2351.4		2347	2409	2397	2447	2463	2412.6		2402	2479	2472	2501	2523	2475.4		2370	2442	2347	2369	2318	2369.2		2281	2297	2170	2189	2276	2242.6		2144	2127	2114	2121	2096	2120.4		1976	2048	1997	2061	2044	2025.2
299	2350	2393	2344	2365	2347	2359.8		2351	2420	2408	2456	2477	2422.4		2413	2485	2479	2513	2531	2484.2		2379	2454	2353	2383	2326	2379		2285	2303	2177	2197	2283	2249		2150	2135	2114	2129	2100	2125.6		1977	2051	2003	2067	2051	2029.8
300	2361	2410	2359	2376	2355	2372.2		2367	2432	2412	2466	2487	2432.8		2423	2491	2487	2522	2540	2492.6		2385	2464	2360	2392	2340	2388.2		2298	2314	2187	2207	2295	2260.2		2156	2142	2122	2136	2108	2132.8		1988	2057	2016	2079	2060	2040
301	2367	2421	2363	2390	2365	2381.2		2377	2443	2417	2476	2496	2441.8		2435	2504	2496	2530	2550	2503		2395	2470	2369	2403	2350	2397.4		2306	2323	2195	2216	2301	2268.2		2165	2148	2127	2140	2113	2138.6		1995	2061	2025	2080	2066	2045.4
302	2382	2431	2370	2397	2374	2390.8		2389	2453	2429	2488	2510	2453.8		2452	2518	2505	2537	2569	2516.2		2401	2483	2384	2420	2365	2410.6		2311	2329	2202	2224	2303	2273.8		2170	2156	2134	2145	2123	2145.6		2007	2067	2033	2087	2072	2053.2
303	2391	2439	2375	2404	2380	2397.8		2395	2465	2440	2501	2516	2463.4		2462	2520	2513	2557	2579	2526.2		2408	2491	2395	2428	2369	2418.2		2315	2335	2210	2229	2310	2279.8		2176	2160	2139	2150	2131	2151.2		2012	2072	2037	2095	2075	2058.2
304	2404	2450	2385	2415	2386	2408		2406	2477	2449	2510	2524	2473.2		2471	2534	2524	2565	2594	2537.6		2419	2502	2407	2440	2373	2428.2		2320	2344	2217	2233	2325	2287.8		2186	2170	2146	2158	2140	2160		2020	2076	2046	2103	2081	2065.2
305	2409	2459	2392	2424	2393	2415.4		2413	2488	2460	2523	2537	2484.2		2485	2541	2537	2573	2602	2547.6		2430	2506	2416	2451	2385	2437.6		2326	2354	2227	2243	2333	2296.6		2196	2183	2157	2173	2148	2171.4		2025	2083	2047	2109	2087	2070.2
306	2416	2468	2403	2431	2398	2423.2		2419	2497	2473	2529	2550	2493.6		2499	2549	2547	2588	2608	2558.2		2440	2518	2427	2463	2396	2448.8		2338	2359	2234	2253	2339	2304.6		2207	2190	2165	2181	2155	2179.6		2035	2087	2053	2115	2095	2077
307	2424	2479	2412	2444	2409	2433.6		2427	2503	2480	2539	2560	2501.8		2510	2558	2559	2599	2613	2567.8		2448	2529	2438	2472	2401	2457.6		2346	2362	2237	2262	2352	2311.8		2212	2192	2171	2190	2158	2184.6		2041	2093	2060	2125	2100	2083.8
308	2436	2494	2426	2453	2421	2446		2437	2513	2493	2547	2571	2512.2		2528	2562	2564	2609	2626	2577.8		2456	2534	2446	2485	2411	2466.4		2349	2370	2245	2270	2356	2318		2220	2202	2178	2196	2163	2191.8		2050	2098	2064	2131	2107	2090
309	2442	2504	2430	2466	2426	2453.6		2446	2520	2499	2559	2582	2521.2		2542	2576	2573	2619	2645	2591		2464	2541	2453	2494	2419	2474.2		2354	2383	2254	2278	2361	2326		2232	2211	2183	2205	2168	2199.8		2057	2105	2070	2135	2114	2096.2
310	2455	2518	2440	2475	2433	2464.2		2456	2532	2505	2575	2591	2531.8		2559	2582	2589	2632	2660	2604.4		2475	2554	2466	2504	2427	2485.2		2363	2395	2264	2290	2370	2336.4		2237	2220	2185	2214	2181	2207.4		2064	2113	2079	2140	2121	2103.4
311	2460	2531	2449	2483	2440	2472.6		2467	2545	2514	2583	2610	2543.8		2571	2595	2596	2639	2669	2614		2486	2566	2477	2513	2436	2495.6		2371	2405	2273	2293	2378	2344		2241	2223	2190	2222	2190	2213.2		2067	2118	2085	2143	2125	2107.6
312	2466	2535	2458	2491	2448	2479.6		2475	2555	2527	2595	2621	2554.6		2583	2609	2610	2652	2684	2627.6		2499	2575	2494	2522	2449	2507.8		2392	2417	2281	2312	2385	2357.4		2257	2230	2199	2235	2200	2224.2		2075	2126	2092	2153	2131	2115.4
313	2477	2543	2467	2495	2457	2487.8		2479	2564	2535	2614	2639	2566.2		2600	2621	2620	2662	2694	2639.4		2511	2582	2501	2535	2463	2518.4		2404	2427	2292	2315	2392	2366		2267	2240	2203	2245	2202	2231.4		2081	2129	2100	2160	2136	2121.2
314	2482	2555	2474	2508	2470	2497.8		2489	2573	2545	2624	2649	2576		2606	2631	2630	2676	2707	2650		2520	2591	2512	2542	2480	2529		2416	2439	2311	2322	2397	2377		2279	2253	2214	2255	2210	2242.2		2088	2137	2108	2166	2144	2128.6
315	2496	2565	2484	2518	2475	2507.6		2504	2580	2555	2636	2655	2586		2615	2646	2639	2688	2712	2660		2532	2601	2520	2552	2495	2540		2427	2450	2317	2336	2410	2388		2290	2263	2222	2262	2219	2251.2		2101	2147	2115	2172	2155	2138
316	2507	2576	2491	2528	2482	2516.8		2518	2588	2567	2646	2664	2596.6		2630	2656	2653	2696	2731	2673.2		2541	2613	2529	2568	2504	2551		2435	2458	2329	2347	2420	2397.8		2300	2273	2231	2274	2233	2262.2		2109	2150	2125	2183	2172	2147.8
317	2513	2579	2504	2537	2490	2524.6		2529	2597	2575	2653	2672	2605.2		2640	2669	2666	2711	2744	2686		2555	2625	2538	2582	2514	2562.8		2448	2466	2338	2352	2430	2406.8		2306	2279	2242	2279	2238	2268.8		2112	2154	2130	2193	2177	2153.2
318	2522	2585	2510	2546	2501	2532.8		2540	2609	2581	2668	2682	2616		2659	2682	2683	2724	2755	2700.6		2565	2634	2549	2588	2522	2571.6		2458	2478	2346	2364	2439	2417		2315	2285	2250	2291	2247	2277.6		2119	2160	2138	2207	2189	2162.6
319	2526	2593	2516	2558	2509	2540.4		2555	2615	2592	2677	2695	2626.8		2673	2692	2696	2739	2767	2713.4		2571	2648	2557	2599	2531	2581.2		2463	2491	2356	2377	2452	2427.8		2323	2290	2260	2294	2251	2283.6		2121	2171	2146	2218	2195	2170.2
320	2531	2600	2521	2568	2520	2548		2575	2623	2602	2684	2706	2638		2682	2706	2702	2743	2772	2721		2583	2659	2566	2609	2536	2590.6		2476	2497	2359	2391	2459	2436.4		2331	2293	2266	2304	2256	2290		2127	2177	2149	2223	2202	2175.6
321	2549	2610	2532	2579	2528	2559.6		2588	2639	2608	2690	2718	2648.6		2694	2715	2713	2757	2779	2731.6		2590	2677	2573	2616	2547	2600.6		2480	2501	2366	2402	2466	2443		2337	2303	2274	2309	2259	2296.4		2132	2181	2156	2226	2209	2180.8
322	2558	2621	2543	2592	2537	2570.2		2601	2647	2620	2699	2732	2659.8		2703	2726	2722	2769	2790	2742		2605	2695	2584	2626	2558	2613.6		2489	2516	2372	2407	2477	2452.2		2345	2310	2280	2318	2271	2304.8		2136	2189	2159	2231	2212	2185.4
323	2573	2629	2555	2603	2548	2581.6		2609	2657	2634	2706	2743	2669.8		2718	2743	2735	2779	2799	2754.8		2612	2705	2597	2635	2566	2623		2493	2528	2379	2418	2483	2460.2		2352	2317	2284	2324	2277	2310.8		2142	2196	2169	2241	2226	2194.8
324	2578	2639	2564	2618	2556	2591		2621	2664	2650	2714	2749	2679.6		2729	2753	2741	2793	2814	2766		2621	2713	2607	2646	2573	2632		2502	2537	2389	2428	2495	2470.2		2360	2320	2289	2336	2286	2318.2		2156	2207	2177	2245	2237	2204.4
325	2593	2651	2571	2630	2568	2602.6		2637	2674	2658	2723	2761	2690.6		2742	2763	2748	2801	2824	2775.6		2631	2726	2620	2655	2586	2643.6		2511	2543	2398	2433	2501	2477.2		2369	2328	2298	2345	2296	2327.2		2164	2217	2184	2250	2246	2212.2
326	2603	2659	2584	2642	2575	2612.6		2651	2686	2668	2731	2770	2701.2		2753	2775	2755	2811	2829	2784.6		2639	2734	2630	2667	2600	2654		2523	2558	2406	2442	2514	2488.6		2371	2335	2311	2353	2306	2335.2		2171	2223	2193	2261	2252	2220
327	2611	2672	2597	2654	2591	2625		2661	2695	2681	2739	2781	2711.4		2766	2785	2763	2824	2849	2797.4		2649	2742	2641	2680	2613	2665		2537	2571	2414	2453	2531	2501.2		2379	2343	2322	2360	2315	2343.8		2178	2227	2198	2273	2263	2227.8
328	2624	2683	2606	2663	2600	2635.2		2671	2700	2695	2749	2792	2721.4		2779	2798	2774	2837	2859	2809.4		2663	2752	2653	2682	2619	2673.8		2549	2579	2427	2473	2542	2514		2392	2351	2338	2372	2325	2355.6		2192	2237	2207	2281	2268	2237
329	2629	2692	2614	2673	2611	2643.8		2678	2706	2703	2760	2811	2731.6		2792	2820	2788	2850	2867	2823.4		2674	2758	2658	2692	2635	2683.4		2560	2595	2442	2478	2556	2526.2		2400	2357	2343	2380	2332	2362.4		2201	2240	2214	2289	2270	2242.8
330	2636	2700	2629	2681	2628	2654.8		2689	2714	2713	2766	2829	2742.2		2808	2830	2797	2862	2884	2836.2		2690	2771	2664	2708	2647	2696		2565	2606	2457	2489	2567	2536.8		2407	2375	2348	2384	2336	2370		2210	2249	2223	2294	2276	2250.4
331	2643	2714	2636	2690	2633	2663.2		2697	2724	2724	2779	2838	2752.4		2817	2836	2805	2869	2896	2844.6		2700	2781	2671	2721	2657	2706		2576	2610	2466	2498	2574	2544.8		2418	2379	2355	2392	2346	2378		2216	2256	2230	2304	2281	2257.4
332	2652	2724	2642	2694	2640	2670.4		2704	2729	2737	2784	2844	2759.6		2829	2843	2814	2874	2904	2852.8		2717	2793	2682	2734	2673	2719.8		2585	2622	2476	2501	2582	2553.2		2428	2384	2371	2395	2355	2386.6		2222	2262	2237	2310	2291	2264.4
333	2662	2731	2654	2707	2643	2679.4		2710	2736	2751	2795	2862	2770.8		2840	2856	2827	2886	2914	2864.6		2733	2804	2691	2748	2687	2732.6		2594	2632	2484	2510	2584	2560.8		2436	2388	2379	2403	2363	2393.8		2229	2269	2239	2314	2303	2270.8
334	2674	2740	2668	2721	2653	2691.2		2722	2747	2760	2807	2871	2781.4		2856	2871	2841	2893	2922	2876.6		2738	2815	2698	2757	2700	2741.6		2599	2639	2492	2518	2596	2568.8		2443	2394	2389	2409	2372	2401.4		2234	2277	2243	2324	2310	2277.6
335	2684	2751	2687	2731	2665	2703.6		2735	2752	2768	2814	2881	2790		2865	2880	2857	2907	2935	2888.8		2754	2822	2710	2771	2708	2753		2612	2645	2498	2523	2604	2576.4		2451	2399	2398	2417	2380	2409		2243	2284	2250	2332	2314	2284.6
336	2692	2759	2699	2739	2675	2712.8		2745	2757	2777	2827	2894	2800		2874	2886	2865	2917	2948	2898		2766	2829	2719	2783	2716	2762.6		2622	2655	2512	2529	2611	2585.8		2459	2411	2407	2422	2392	2418.2		2250	2290	2260	2342	2322	2292.8
337	2695	2768	2703	2747	2684	2719.4		2754	2769	2783	2831	2906	2808.6		2887	2893	2876	2926	2955	2907.4		2774	2841	2730	2790	2730	2773		2631	2664	2520	2536	2619	2594		2469	2425	2417	2429	2402	2428.4		2256	2306	2271	2350	2329	2302.4
338	2710	2778	2712	2753	2691	2728.8		2764	2776	2794	2845	2911	2818		2898	2907	2885	2938	2963	2918.2		2783	2858	2743	2801	2738	2784.6		2647	2679	2525	2547	2630	2605.6		2476	2434	2426	2437	2417	2438		2263	2316	2277	2363	2339	2311.6
339	2715	2785	2721	2763	2701	2737		2776	2787	2807	2853	2924	2829.4		2905	2917	2901	2956	2973	2930.4		2796	2866	2749	2809	2749	2793.8		2661	2686	2532	2558	2637	2614.8		2483	2440	2433	2442	2424	2444.4		2270	2322	2281	2368	2343	2316.8
340	2732	2792	2732	2779	2709	2748.8		2785	2792	2815	2861	2931	2836.8		2919	2930	2909	2963	2983	2940.8		2808	2878	2761	2819	2760	2805.2		2674	2696	2540	2569	2646	2625		2492	2449	2442	2450	2435	2453.6		2281	2327	2286	2379	2352	2325
341	2740	2804	2749	2791	2720	2760.8		2796	2804	2830	2876	2947	2850.6		2931	2945	2919	2979	2999	2954.6		2831	2891	2773	2831	2773	2819.8		2683	2706	2546	2577	2656	2633.6		2500	2452	2451	2455	2445	2460.6		2291	2340	2290	2389	2360	2334
342	2752	2819	2759	2803	2729	2772.4		2808	2816	2845	2887	2957	2862.6		2938	2956	2929	2992	3011	2965.2		2848	2904	2780	2844	2785	2832.2		2691	2718	2555	2584	2664	2642.4		2506	2465	2463	2458	2454	2469.2		2303	2359	2301	2400	2371	2346.8
343	2768	2828	2770	2813	2738	2783.4		2822	2826	2851	2896	2969	2872.8		2951	2962	2937	3011	3016	2975.4		2859	2918	2794	2854	2794	2843.8		2699	2728	2562	2595	2675	2651.8		2521	2478	2470	2465	2462	2479.2		2312	2364	2307	2405	2380	2353.6
344	2781	2836	2781	2822	2755	2795		2835	2836	2862	2903	2971	2881.4		2965	2977	2951	3027	3027	2989.4		2870	2930	2805	2860	2806	2854.2		2708	2738	2570	2605	2685	2661.2		2528	2489	2478	2479	2471	2489		2317	2376	2313	2411	2387	2360.8
345	2794	2845	2795	2826	2762	2804.4		2847	2847	2872	2919	2978	2892.6		2975	2984	2963	3038	3038	2999.6		2878	2947	2812	2867	2812	2863.2		2712	2749	2578	2617	2694	2670		2536	2499	2482	2494	2472	2496.6		2323	2386	2322	2421	2394	2369.2
346	2807	2857	2804	2834	2774	2815.2		2855	2856	2878	2930	2986	2901		2990	2991	2969	3046	3049	3009		2886	2958	2819	2881	2821	2873		2722	2764	2595	2633	2707	2684.2		2547	2511	2502	2501	2480	2508.2		2333	2396	2332	2432	2406	2379.8
347	2814	2867	2819	2841	2782	2824.6		2868	2868	2884	2945	2993	2911.6		3000	2998	2976	3054	3059	3017.4		2895	2971	2836	2886	2830	2883.6		2730	2780	2607	2640	2712	2693.8		2560	2526	2515	2512	2494	2521.4		2341	2399	2338	2436	2414	2385.6
348	2823	2882	2828	2848	2791	2834.4		2878	2872	2895	2958	3006	2921.8		3010	3001	2988	3073	3073	3029		2904	2986	2845	2904	2842	2896.2		2739	2787	2615	2648	2726	2703		2567	2534	2527	2521	2500	2529.8		2344	2408	2344	2443	2429	2393.6
349	2833	2892	2838	2864	2801	2845.6		2891	2884	2910	2965	3018	2933.6		3019	3015	2992	3083	3079	3037.6		2913	2996	2854	2914	2857	2906.8		2753	2799	2627	2657	2736	2714.4		2575	2544	2533	2532	2511	2539		2357	2417	2355	2450	2434	2402.6
350	2844	2899	2844	2871	2811	2853.8		2909	2893	2917	2976	3030	2945		3036	3025	3013	3090	3089	3050.6		2923	3014	2865	2934	2874	2922		2754	2813	2632	2665	2747	2722.2		2588	2558	2545	2540	2524	2551		2364	2435	2362	2460	2442	2412.6
351	2850	2904	2853	2881	2829	2863.4		2923	2900	2923	2982	3037	2953		3048	3038	3023	3106	3102	3063.4		2937	3024	2877	2943	2889	2934		2761	2820	2645	2673	2760	2731.8		2597	2568	2554	2552	2544	2563		2367	2439	2368	2469	2449	2418.4
352	2859	2917	2859	2887	2843	2873		2929	2915	2938	2993	3050	2965		3062	3055	3034	3115	3111	3075.4		2951	3041	2890	2953	2904	2947.8		2770	2830	2657	2686	2768	2742.2		2609	2577	2560	2564	2556	2573.2		2373	2442	2373	2476	2455	2423.8
353	2865	2935	2869	2901	2858	2885.6		2938	2917	2947	3002	3066	2974		3071	3066	3041	3128	3125	3086.2		2963	3047	2905	2967	2911	2958.6		2781	2841	2665	2690	2777	2750.8		2614	2588	2566	2572	2564	2580.8		2378	2447	2382	2481	2460	2429.6
354	2889	2940	2879	2916	2868	2898.4		2944	2930	2959	3012	3075	2984		3077	3076	3057	3139	3134	3096.6		2969	3063	2912	2979	2924	2969.4		2790	2848	2676	2696	2783	2758.6		2622	2600	2573	2580	2574	2589.8		2389	2455	2399	2492	2468	2440.6
355	2901	2952	2891	2927	2878	2909.8		2956	2936	2968	3021	3086	2993.4		3084	3086	3071	3148	3150	3107.8		2977	3071	2922	2996	2935	2980.2		2797	2860	2692	2708	2792	2769.8		2629	2609	2581	2585	2582	2597.2		2399	2461	2412	2500	2474	2449.2
356	2914	2962	2894	2935	2890	2919		2967	2948	2977	3037	3096	3005		3092	3100	3080	3160	3160	3118.4		2985	3080	2936	3002	2946	2989.8		2802	2869	2702	2723	2799	2779		2637	2618	2591	2598	2599	2608.6		2410	2467	2418	2513	2485	2458.6
357	2924	2978	2903	2944	2900	2929.8		2975	2957	2989	3056	3107	3016.8		3105	3112	3092	3178	3173	3132		2997	3093	2948	3013	2961	3002.4		2814	2874	2709	2736	2806	2787.8		2644	2625	2601	2610	2612	2618.4		2419	2474	2427	2518	2491	2465.8
358	2934	2988	2910	2953	2912	2939.4		2983	2965	3003	3073	3119	3028.6		3114	3124	3102	3187	3185	3142.4		3007	3101	2957	3030	2974	3013.8		2825	2881	2721	2744	2818	2797.8		2652	2631	2613	2623	2621	2628		2430	2482	2433	2525	2501	2474.2
359	2942	3000	2918	2963	2920	2948.6		2990	2974	3008	3085	3128	3037		3124	3133	3114	3199	3198	3153.6		3017	3113	2971	3045	2982	3025.6		2832	2896	2734	2751	2827	2808		2662	2638	2621	2633	2634	2637.6		2437	2492	2444	2531	2503	2481.4
360	2951	3017	2931	2975	2926	2960		3003	2983	3021	3098	3139	3048.8		3133	3142	3129	3205	3204	3162.6		3029	3119	2988	3052	2994	3036.4		2841	2903	2742	2762	2839	2817.4		2670	2646	2635	2639	2642	2646.4		2446	2501	2459	2543	2513	2492.4
361	2958	3029	2942	2989	2932	2970		3020	2995	3032	3115	3151	3062.6		3141	3157	3143	3218	3221	3176		3043	3129	3001	3061	3010	3048.8		2849	2910	2747	2772	2850	2825.6		2682	2653	2644	2648	2652	2655.8		2455	2508	2472	2556	2527	2503.6
362	2971	3035	2959	2995	2943	2980.6		3025	3006	3047	3124	3162	3072.8		3155	3171	3149	3230	3231	3187.2		3055	3141	3009	3073	3022	3060		2859	2919	2758	2785	2858	2835.8		2690	2662	2653	2658	2662	2665		2459	2515	2474	2569	2539	2511.2
363	2985	3051	2974	3006	2958	2994.8		3028	3023	3056	3135	3168	3082		3163	3177	3153	3244	3239	3195.2		3066	3152	3018	3084	3044	3072.8		2872	2922	2766	2791	2866	2843.4		2695	2669	2664	2660	2669	2671.4		2465	2524	2485	2579	2548	2520.2
364	2997	3065	2984	3014	2965	3005		3033	3036	3068	3145	3181	3092.6		3173	3194	3160	3256	3251	3206.8		3073	3160	3037	3097	3060	3085.4		2880	2932	2779	2809	2879	2855.8		2702	2676	2671	2671	2676	2679.2		2475	2532	2495	2588	2555	2529
365	3007	3078	2991	3027	2974	3015.4		3037	3041	3075	3159	3194	3101.2		3181	3200	3171	3262	3261	3215		3084	3167	3047	3102	3068	3093.6		2887	2938	2787	2819	2897	2865.6		2716	2688	2681	2682	2685	2690.4		2485	2536	2508	2597	2562	2537.6
366	3019	3087	3003	3041	2990	3028		3042	3057	3080	3170	3203	3110.4		3198	3209	3185	3273	3271	3227.2		3094	3185	3057	3116	3079	3106.2		2894	2949	2792	2824	2914	2874.6		2728	2694	2690	2691	2701	2700.8		2490	2541	2510	2608	2573	2544.4
367	3026	3106	3011	3054	2998	3039		3048	3071	3093	3181	3212	3121		3204	3219	3193	3279	3282	3235.4		3108	3197	3066	3129	3090	3118		2907	2958	2805	2842	2919	2886.2		2734	2702	2698	2703	2707	2708.8		2495	2549	2524	2615	2581	2552.8
368	3036	3117	3022	3062	3007	3048.8		3062	3087	3110	3196	3227	3136.4		3217	3238	3208	3293	3297	3250.6		3123	3209	3084	3142	3104	3132.4		2929	2981	2814	2848	2930	2900.4		2751	2707	2704	2714	2721	2719.4		2506	2567	2532	2623	2587	2563
369	3052	3131	3028	3070	3019	3060		3075	3100	3119	3209	3236	3147.8		3224	3247	3216	3312	3311	3262		3129	3216	3090	3153	3115	3140.6		2941	2989	2827	2862	2942	2912.2		2761	2714	2718	2718	2731	2728.4		2515	2572	2540	2637	2594	2571.6
370	3064	3143	3042	3078	3032	3071.8		3085	3113	3128	3219	3252	3159.4		3236	3261	3225	3319	3323	3272.8		3141	3233	3102	3164	3127	3153.4		2948	3007	2841	2876	2957	2925.8		2768	2720	2726	2725	2741	2736		2530	2583	2549	2644	2603	2581.8
371	3070	3153	3048	3086	3044	3080.2		3095	3121	3135	3228	3264	3168.6		3245	3275	3240	3328	3328	3283.2		3152	3240	3114	3177	3136	3163.8		2963	3017	2854	2888	2967	2937.8		2777	2737	2738	2739	2749	2748		2541	2593	2561	2653	2621	2593.8
372	3081	3169	3060	3096	3053	3091.8		3107	3134	3150	3239	3279	3181.8		3252	3285	3245	3344	3340	3293.2		3161	3253	3126	3193	3147	3176		2968	3034	2860	2894	2983	2947.8		2784	2754	2750	2748	2759	2759		2548	2601	2575	2660	2637	2604.2
373	3092	3181	3072	3104	3070	3103.8		3117	3146	3162	3252	3293	3194		3261	3302	3261	3352	3351	3305.4		3170	3270	3138	3202	3157	3187.4		2975	3049	2871	2901	2992	2957.6		2790	2767	2764	2755	2766	2768.4		2551	2610	2587	2666	2645	2611.8
374	3100	3198	3078	3111	3079	3113.2		3126	3161	3175	3261	3305	3205.6		3270	3312	3273	3364	3366	3317		3189	3282	3146	3219	3168	3200.8		2982	3066	2885	2915	3002	2970		2798	2779	2768	2766	2774	2777		2557	2620	2602	2680	2653	2622.4
375	3105	3204	3093	3120	3090	3122.4		3138	3174	3188	3276	3314	3218		3287	3322	3277	3376	3386	3329.6		3198	3293	3153	3226	3176	3209.2		2993	3071	2898	2921	3016	2979.8		2803	2800	2773	2778	2784	2787.6		2566	2629	2614	2688	2664	2632.2
376	3118	3222	3102	3128	3104	3134.8		3145	3184	3201	3286	3330	3229.2		3294	3335	3289	3390	3392	3340		3208	3302	3164	3236	3182	3218.4		3005	3085	2908	2928	3030	2991.2		2814	2807	2785	2790	2796	2798.4		2572	2642	2617	2698	2675	2640.8
377	3130	3236	3121	3135	3112	3146.8		3155	3198	3215	3297	3339	3240.8		3304	3342	3301	3399	3411	3351.4		3216	3318	3176	3243	3202	3231		3019	3092	2921	2946	3039	3003.4		2823	2819	2793	2802	2805	2808.4		2579	2648	2633	2711	2683	2650.8
378	3148	3249	3133	3146	3128	3160.8		3173	3215	3225	3308	3355	3255.2		3321	3356	3315	3415	3424	3366.2		3228	3324	3189	3259	3218	3243.6		3033	3103	2927	2955	3043	3012.2		2832	2826	2806	2814	2815	2818.6		2584	2658	2640	2719	2695	2659.2
379	3160	3262	3146	3160	3136	3172.8		3178	3227	3235	3321	3368	3265.8		3325	3365	3325	3422	3439	3375.2		3236	3339	3203	3269	3224	3254.2		3045	3113	2937	2965	3057	3023.4		2845	2834	2816	2825	2828	2829.6		2593	2668	2648	2726	2710	2669
380	3175	3272	3159	3175	3143	3184.8		3189	3238	3247	3328	3378	3276		3333	3372	3343	3435	3445	3385.6		3244	3352	3214	3279	3235	3264.8		3052	3124	2948	2972	3069	3033		2852	2840	2826	2833	2834	2837		2602	2677	2656	2733	2715	2676.6
381	3185	3279	3174	3189	3151	3195.6		3197	3252	3258	3335	3387	3285.8		3343	3383	3351	3446	3456	3395.8		3256	3367	3227	3292	3242	3276.8		3064	3129	2958	2981	3074	3041.2		2862	2847	2842	2844	2843	2847.6		2610	2688	2662	2742	2720	2684.4
382	3199	3292	3184	3197	3162	3206.8		3212	3263	3261	3349	3400	3297		3350	3397	3365	3457	3467	3407.2		3268	3378	3239	3303	3251	3287.8		3072	3142	2972	2992	3090	3053.6		2872	2854	2851	2851	2852	2856		2620	2692	2671	2748	2729	2692
383	3210	3300	3198	3206	3178	3218.4		3226	3279	3269	3362	3416	3310.4		3357	3409	3385	3471	3483	3421		3279	3392	3251	3310	3265	3299.4		3087	3157	2982	3003	3098	3065.4		2884	2860	2861	2860	2866	2866.2		2631	2698	2676	2756	2735	2699.2
384	3226	3317	3212	3223	3185	3232.6		3237	3290	3279	3372	3422	3320		3365	3424	3398	3483	3493	3432.6		3295	3399	3262	3315	3276	3309.4		3099	3169	2992	3013	3111	3076.8		2892	2871	2870	2870	2880	2876.6		2641	2710	2682	2764	2742	2707.8
385	3237	3333	3222	3237	3207	3247.2		3247	3298	3285	3383	3436	3329.8		3378	3439	3410	3492	3503	3444.4		3301	3413	3269	3328	3287	3319.6		3112	3180	3002	3020	3121	3087		2897	2877	2878	2887	2885	2884.8		2652	2722	2688	2769	2746	2715.4
386	3248	3343	3232	3248	3220	3258.2		3257	3314	3296	3390	3443	3340		3391	3452	3425	3502	3521	3458.2		3317	3430	3280	3335	3292	3330.8		3126	3195	3014	3029	3130	3098.8		2907	2884	2885	2896	2894	2893.2		2666	2734	2695	2781	2750	2725.2
387	3259	3356	3242	3255	3229	3268.2		3268	3322	3310	3401	3453	3350.8		3403	3463	3432	3517	3535	3470		3330	3442	3292	3346	3297	3341.4		3141	3203	3024	3041	3140	3109.8		2910	2891	2902	2902	2901	2901.2		2679	2743	2702	2793	2755	2734.4
388	3274	3365	3258	3271	3240	3281.6		3281	3338	3320	3410	3472	3364.2		3415	3477	3443	3536	3548	3483.8		3339	3451	3305	3366	3311	3354.4		3156	3211	3034	3052	3151	3120.8		2920	2902	2919	2906	2908	2911		2684	2759	2713	2806	2760	2744.4
389	3284	3375	3266	3278	3249	3290.4		3292	3346	3335	3419	3477	3373.8		3429	3487	3457	3553	3559	3497		3351	3469	3316	3381	3324	3368.2		3170	3227	3041	3056	3163	3131.4		2926	2907	2926	2916	2917	2918.4		2697	2765	2727	2814	2770	2754.6
390	3295	3388	3283	3288	3263	3303.4		3303	3357	3347	3433	3485	3385		3440	3500	3473	3571	3572	3511.2		3360	3479	3331	3388	3336	3378.8		3177	3239	3050	3074	3169	3141.8		2941	2912	2934	2925	2925	2927.4		2709	2775	2739	2829	2780	2766.4
391	3303	3395	3289	3297	3269	3310.6		3315	3370	3361	3444	3498	3397.6		3451	3513	3480	3584	3584	3522.4		3368	3491	3338	3394	3344	3387		3187	3249	3062	3080	3180	3151.6		2951	2923	2944	2932	2941	2938.2		2718	2786	2749	2840	2788	2776.2
392	3317	3411	3299	3309	3283	3323.8		3326	3385	3370	3454	3514	3409.8		3464	3524	3493	3590	3598	3533.8		3381	3503	3349	3413	3356	3400.4		3198	3259	3074	3085	3193	3161.8		2957	2936	2950	2948	2949	2948		2736	2796	2756	2854	2809	2790.2
393	3327	3420	3310	3319	3298	3334.8		3335	3394	3379	3461	3522	3418.2		3484	3529	3499	3596	3608	3543.2		3389	3513	3358	3425	3362	3409.4		3210	3270	3086	3095	3205	3173.2		2970	2946	2960	2953	2956	2957		2747	2810	2767	2868	2817	2801.8
394	3339	3430	3319	3330	3309	3345.4		3344	3403	3385	3473	3549	3430.8		3496	3538	3510	3605	3624	3554.6		3402	3524	3369	3434	3377	3421.2		3224	3277	3099	3107	3217	3184.8		2974	2957	2971	2968	2967	2967.4		2752	2817	2773	2878	2824	2808.8
395	3353	3438	3330	3341	3323	3357		3354	3418	3390	3490	3562	3442.8		3505	3552	3517	3618	3634	3565.2		3411	3531	3379	3453	3389	3432.6		3235	3281	3112	3116	3228	3194.4		2984	2962	2980	2981	2981	2977.6		2762	2823	2786	2889	2832	2818.4
396	3362	3451	3340	3353	3334	3368		3367	3430	3402	3506	3568	3454.6		3513	3564	3530	3632	3646	3577		3427	3547	3392	3466	3397	3445.8		3247	3297	3125	3132	3238	3207.8		2989	2974	2990	2993	2995	2988.2		2769	2830	2791	2895	2839	2824.8
397	3376	3456	3351	3368	3345	3379.2		3374	3449	3414	3517	3579	3466.6		3519	3572	3541	3641	3655	3585.6		3434	3562	3399	3483	3400	3455.6		3259	3304	3134	3138	3251	3217.2		2993	2983	3001	3008	3002	2997.4		2780	2845	2802	2909	2848	2836.8
398	3387	3470	3364	3377	3358	3391.2		3383	3469	3426	3525	3594	3479.4		3528	3588	3556	3650	3673	3599		3454	3567	3413	3493	3408	3467		3265	3323	3141	3150	3265	3228.8		3001	2992	3005	3015	3007	3004		2790	2853	2811	2920	2859	2846.6
399	3403	3484	3377	3393	3363	3404		3392	3490	3441	3536	3611	3494		3538	3603	3566	3665	3687	3611.8		3461	3574	3428	3497	3419	3475.8		3276	3331	3151	3161	3281	3240		3013	3001	3016	3026	3022	3015.6		2792	2858	2815	2932	2871	2853.6
400	3416	3497	3393	3407	3380	3418.6		3408	3504	3455	3551	3625	3508.6		3547	3611	3576	3670	3699	3620.6		3468	3585	3439	3508	3442	3488.4		3283	3339	3163	3174	3296	3251		3017	3012	3028	3040	3029	3025.2		2804	2867	2821	2940	2882	2862.8
401	3424	3504	3404	3416	3389	3427.4		3422	3516	3467	3564	3635	3520.8		3560	3617	3586	3686	3705	3630.8		3489	3595	3453	3517	3453	3501.4		3297	3347	3172	3183	3311	3262		3021	3017	3040	3044	3038	3032		2816	2874	2829	2949	2890	2871.6
402	3435	3518	3415	3427	3396	3438.2		3441	3527	3479	3574	3652	3534.6		3568	3635	3609	3700	3720	3646.4		3501	3610	3470	3530	3465	3515.2		3309	3357	3177	3195	3327	3273		3032	3023	3054	3054	3055	3043.6		2823	2885	2842	2963	2904	2883.4
403	3451	3535	3429	3441	3421	3455.4		3454	3550	3490	3593	3670	3551.4		3574	3640	3626	3714	3730	3656.8		3507	3619	3479	3541	3476	3524.4		3322	3364	3186	3199	3336	3281.4		3046	3029	3064	3060	3065	3052.8		2831	2892	2851	2973	2909	2891.2
404	3461	3549	3440	3453	3425	3465.6		3464	3556	3509	3610	3681	3564		3585	3653	3636	3725	3739	3667.6		3520	3625	3487	3554	3482	3533.6		3329	3377	3198	3206	3341	3290.2		3056	3037	3072	3072	3071	3061.6		2841	2900	2863	2981	2920	2901
405	3476	3565	3461	3463	3434	3479.8		3477	3561	3520	3621	3697	3575.2		3597	3658	3644	3739	3751	3677.8		3533	3635	3495	3567	3499	3545.8		3335	3386	3206	3220	3353	3300		3067	3052	3085	3080	3081	3073		2848	2909	2874	2990	2930	2910.2
406	3484	3587	3470	3476	3444	3492.2		3484	3575	3532	3633	3710	3586.8		3607	3668	3651	3753	3759	3687.6		3546	3641	3505	3579	3507	3555.6		3342	3399	3214	3230	3369	3310.8		3077	3063	3099	3093	3085	3083.4		2859	2919	2882	3001	2938	2919.8
407	3500	3595	3478	3489	3456	3503.6		3502	3586	3541	3647	3720	3599.2		3618	3679	3665	3760	3768	3698		3560	3655	3516	3587	3521	3567.8		3351	3412	3224	3239	3376	3320.4		3087	3072	3109	3105	3094	3093.4		2870	2930	2898	3010	2952	2932
408	3509	3601	3492	3502	3461	3513		3521	3600	3559	3666	3735	3616.2		3626	3695	3673	3779	3776	3709.8		3572	3665	3533	3600	3526	3579.2		3358	3425	3234	3247	3394	3331.6		3095	3078	3120	3110	3104	3101.4		2885	2937	2916	3021	2963	2944.4
409	3518	3607	3501	3511	3470	3521.4		3531	3610	3573	3679	3755	3629.6		3634	3706	3683	3787	3791	3720.2		3583	3672	3545	3612	3535	3589.4		3363	3436	3244	3260	3402	3341		3103	3090	3131	3119	3115	3111.6		2897	2951	2933	3028	2973	2956.4
410	3529	3619	3509	3531	3481	3533.8		3536	3620	3577	3693	3765	3638.2		3645	3712	3700	3802	3805	3732.8		3590	3679	3554	3625	3550	3599.6		3375	3444	3248	3275	3412	3350.8		3119	3095	3137	3140	3124	3123		2906	2961	2939	3035	2977	2963.6
411	3537	3629	3519	3542	3492	3543.8		3549	3632	3599	3704	3776	3652		3656	3724	3713	3812	3816	3744.2		3599	3690	3562	3634	3565	3610		3384	3458	3256	3287	3422	3361.4		3130	3110	3147	3146	3133	3133.2		2919	2973	2953	3043	2988	2975.2
412	3546	3643	3526	3551	3503	3553.8		3559	3642	3609	3717	3786	3662.6		3667	3734	3727	3820	3824	3754.4		3607	3706	3572	3636	3578	3619.8		3396	3472	3265	3297	3435	3373		3139	3127	3160	3156	3146	3145.6		2929	2986	2967	3047	2998	2985.4
413	3561	3658	3540	3557	3514	3566		3570	3656	3626	3735	3797	3676.8		3677	3745	3736	3833	3831	3764.4		3621	3715	3586	3645	3592	3631.8		3407	3481	3280	3303	3448	3383.8		3144	3146	3171	3162	3153	3155.2		2942	2998	2975	3053	3007	2995
414	3565	3673	3548	3568	3521	3575		3583	3671	3639	3751	3814	3691.6		3694	3755	3752	3848	3846	3779		3631	3734	3593	3659	3601	3643.6		3418	3490	3295	3313	3457	3394.6		3155	3161	3188	3166	3163	3166.6		2953	3011	2983	3060	3011	3003.6
415	3579	3687	3561	3578	3529	3586.8		3596	3683	3657	3764	3832	3706.4		3703	3766	3763	3860	3864	3791.2		3643	3741	3603	3668	3612	3653.4		3430	3498	3308	3326	3470	3406.4		3167	3172	3203	3175	3170	3177.4		2965	3019	2992	3067	3019	3012.4
416	3587	3701	3572	3588	3543	3598.2		3609	3699	3671	3773	3841	3718.6		3718	3778	3776	3872	3881	3805		3653	3751	3617	3682	3625	3665.6		3438	3509	3317	3334	3480	3415.6		3177	3182	3213	3182	3183	3187.4		2968	3030	3002	3069	3024	3018.6
417	3601	3712	3587	3601	3554	3611		3620	3714	3683	3785	3852	3730.8		3733	3787	3785	3880	3894	3815.8		3665	3758	3631	3694	3638	3677.2		3453	3522	3324	3350	3491	3428		3183	3196	3222	3190	3196	3197.4		2982	3038	3011	3084	3036	3030.2
418	3615	3719	3599	3610	3564	3621.4		3631	3729	3700	3795	3862	3743.4		3746	3800	3795	3897	3908	3829.2		3681	3771	3638	3702	3654	3689.2		3467	3535	3333	3357	3500	3438.4		3189	3204	3229	3201	3200	3204.6		2993	3047	3016	3092	3041	3037.8
419	3627	3727	3607	3623	3587	3634.2		3657	3746	3709	3806	3877	3759		3755	3815	3814	3908	3923	3843		3697	3789	3655	3718	3664	3704.6		3476	3550	3343	3364	3509	3448.4		3202	3215	3240	3205	3214	3215.2		3001	3054	3025	3102	3060	3048.4
420	3635	3747	3617	3639	3598	3647.2		3665	3760	3720	3819	3891	3771		3771	3830	3833	3919	3933	3857.2		3709	3799	3660	3732	3670	3714		3485	3554	3352	3383	3518	3458.4		3218	3222	3250	3214	3224	3225.6		3007	3066	3031	3111	3064	3055.8
421	3647	3756	3629	3661	3609	3660.4		3677	3768	3730	3829	3904	3781.6		3782	3843	3849	3929	3943	3869.2		3722	3808	3670	3741	3678	3723.8		3497	3569	3365	3399	3532	3472.4		3226	3230	3261	3229	3235	3236.2		3014	3077	3042	3124	3083	3068
422	3665	3767	3641	3667	3612	3670.4		3691	3781	3746	3850	3916	3796.8		3791	3854	3864	3942	3960	3882.2		3740	3818	3683	3753	3689	3736.6		3508	3575	3375	3407	3540	3481		3235	3237	3270	3233	3238	3242.6		3027	3085	3053	3131	3093	3077.8
423	3674	3791	3662	3681	3624	3686.4		3703	3792	3758	3864	3931	3809.6		3805	3868	3877	3955	3967	3894.4		3754	3821	3691	3764	3695	3745		3519	3586	3385	3421	3548	3491.8		3241	3248	3276	3242	3249	3251.2		3043	3091	3064	3142	3102	3088.4
424	3684	3805	3679	3697	3639	3700.8		3714	3802	3767	3866	3946	3819		3811	3883	3884	3961	3977	3903.2		3766	3831	3704	3774	3706	3756.2		3531	3593	3397	3428	3562	3502.2		3248	3256	3281	3252	3259	3259.2		3063	3102	3075	3149	3105	3098.8
425	3700	3820	3692	3709	3655	3715.2		3728	3817	3781	3877	3958	3832.2		3823	3895	3898	3976	3992	3916.8		3783	3841	3716	3788	3715	3768.6		3545	3609	3410	3444	3568	3515.2		3261	3267	3291	3267	3268	3270.8		3070	3115	3091	3159	3121	3111.2
426	3710	3833	3707	3721	3676	3729.4		3736	3829	3788	3884	3968	3841		3838	3909	3910	3986	4010	3930.6		3794	3856	3727	3802	3722	3780.2		3557	3620	3418	3456	3578	3525.8		3276	3274	3299	3275	3276	3280		3081	3134	3102	3167	3134	3123.6
427	3719	3847	3718	3728	3689	3740.2		3749	3849	3803	3897	3978	3855.2		3847	3928	3925	4001	4016	3943.4		3805	3866	3735	3816	3732	3790.8		3566	3631	3425	3471	3591	3536.8		3286	3281	3312	3287	3289	3291		3092	3142	3113	3178	3146	3134.2
428	3730	3861	3729	3740	3705	3753		3760	3854	3816	3906	3988	3864.8		3856	3944	3939	4013	4034	3957.2		3814	3883	3747	3823	3743	3802		3573	3646	3435	3481	3605	3548		3295	3296	3323	3299	3297	3302		3106	3152	3119	3184	3155	3143.2
429	3743	3871	3744	3758	3715	3766.2		3767	3863	3830	3923	4004	3877.4		3867	3965	3947	4024	4053	3971.2		3826	3902	3760	3836	3760	3816.8		3586	3658	3443	3489	3612	3557.6		3310	3304	3339	3306	3307	3313.2		3118	3163	3125	3195	3171	3154.4
430	3757	3886	3751	3774	3720	3777.6		3775	3872	3841	3935	4021	3888.8		3881	3979	3961	4039	4064	3984.8		3838	3920	3772	3847	3768	3829		3596	3668	3448	3504	3620	3567.2		3326	3310	3354	3313	3322	3325		3129	3174	3135	3208	3184	3166
431	3771	3899	3762	3795	3736	3792.6		3789	3886	3854	3954	4037	3904		3894	3988	3978	4053	4079	3998.4		3844	3929	3786	3859	3777	3839		3605	3681	3456	3514	3634	3578		3335	3323	3368	3322	3332	3336		3139	3180	3147	3221	3195	3176.4
432	3781	3909	3771	3807	3751	3803.8		3798	3905	3865	3967	4048	3916.6		3907	3998	4000	4060	4097	4012.4		3855	3945	3797	3869	3783	3849.8		3616	3687	3461	3529	3649	3588.4		3342	3331	3376	3336	3344	3345.8		3148	3194	3160	3236	3198	3187.2
433	3795	3931	3788	3825	3771	3822		3806	3915	3875	3976	4058	3926		3925	4011	4015	4077	4117	4029		3863	3959	3809	3888	3795	3862.8		3618	3702	3467	3538	3663	3597.6		3358	3335	3382	3343	3355	3354.6		3157	3204	3167	3243	3215	3197.2
434	3804	3936	3798	3850	3781	3833.8		3819	3927	3888	3993	4070	3939.4		3935	4027	4028	4090	4127	4041.4		3878	3974	3825	3893	3823	3878.6		3629	3720	3480	3544	3676	3609.8		3372	3343	3390	3353	3366	3364.8		3171	3211	3175	3252	3229	3207.6
435	3816	3950	3811	3862	3787	3845.2		3828	3940	3905	4009	4079	3952.2		3941	4041	4049	4099	4141	4054.2		3885	3987	3836	3903	3839	3890		3644	3733	3496	3553	3694	3624		3389	3357	3399	3366	3385	3379.2		3177	3225	3188	3258	3244	3218.4
436	3827	3963	3826	3876	3796	3857.6		3842	3957	3916	4023	4090	3965.6		3962	4062	4064	4113	4155	4071.2		3899	4003	3851	3915	3857	3905		3655	3742	3503	3562	3712	3634.8		3396	3369	3410	3377	3400	3390.4		3187	3236	3202	3267	3253	3229
437	3841	3979	3840	3891	3811	3872.4		3850	3973	3933	4043	4102	3980.2		3969	4083	4080	4130	4172	4086.8		3909	4012	3866	3929	3866	3916.4		3666	3754	3514	3575	3726	3647		3410	3385	3421	3394	3410	3404		3201	3246	3211	3273	3260	3238.2
438	3851	3986	3854	3911	3824	3885.2		3860	3983	3947	4061	4121	3994.4		3984	4095	4094	4146	4185	4100.8		3920	4025	3878	3940	3872	3927		3674	3766	3525	3578	3739	3656.4		3422	3392	3428	3407	3420	3413.8		3216	3258	3225	3280	3267	3249.2
439	3870	3996	3866	3926	3847	3901		3877	3996	3957	4075	4141	4009.2		4002	4116	4107	4152	4195	4114.4		3937	4041	3883	3950	3887	3939.6		3686	3778	3537	3584	3747	3666.4		3434	3403	3442	3416	3432	3425.4		3227	3273	3236	3292	3282	3262
440	3889	4011	3879	3937	3862	3915.6		3886	4002	3967	4090	4147	4018.4		4009	4126	4119	4160	4208	4124.4		3949	4056	3895	3959	3905	3952.8		3698	3791	3546	3596	3766	3679.4		3443	3415	3450	3424	3443	3435		3233	3287	3249	3302	3291	3272.4
441	3907	4022	3892	3952	3874	3929.4		3901	4019	3984	4107	4159	4034		4034	4136	4134	4180	4223	4141.4		3961	4073	3910	3973	3921	3967.6		3707	3798	3554	3601	3780	3688		3458	3425	3456	3430	3449	3443.6		3245	3302	3266	3314	3299	3285.2
442	3917	4028	3903	3964	3882	3938.8		3918	4039	4002	4124	4169	4050.4		4045	4152	4148	4198	4236	4155.8		3968	4086	3930	3982	3938	3980.8		3717	3808	3567	3614	3793	3699.8		3471	3434	3466	3436	3459	3453.2		3252	3314	3272	3321	3307	3293.2
443	3935	4050	3921	3976	3894	3955.2		3933	4051	4015	4134	4186	4063.8		4054	4172	4164	4214	4248	4170.4		3985	4106	3938	4003	3955	3997.4		3731	3820	3579	3620	3816	3713.2		3489	3448	3479	3450	3473	3467.8		3261	3323	3280	3329	3316	3301.8
444	3955	4060	3933	3984	3907	3967.8		3943	4062	4031	4143	4201	4076		4064	4187	4178	4227	4265	4184.2		3998	4116	3948	4016	3966	4008.8		3745	3826	3589	3633	3824	3723.4		3504	3465	3491	3466	3484	3482		3267	3335	3288	3342	3335	3313.4
445	3961	4078	3947	3992	3916	3978.8		3954	4083	4047	4157	4212	4090.6		4076	4208	4192	4242	4289	4201.4		4016	4130	3964	4025	3972	4021.4		3755	3840	3596	3649	3835	3735		3513	3479	3499	3479	3491	3492.2		3275	3340	3300	3350	3347	3322.4
446	3973	4098	3958	4006	3930	3993		3968	4097	4062	4168	4222	4103.4		4085	4217	4205	4253	4310	4214		4021	4140	3977	4040	3985	4032.6		3765	3845	3613	3655	3848	3745.2		3523	3491	3515	3496	3497	3504.4		3283	3348	3313	3355	3350	3329.8
447	3984	4114	3971	4029	3941	4007.8		3983	4112	4079	4187	4239	4120		4102	4228	4226	4269	4327	4230.4		4034	4155	3989	4050	3996	4044.8		3778	3861	3623	3669	3864	3759		3536	3502	3521	3509	3509	3515.4		3294	3362	3318	3373	3357	3340.8
448	4003	4134	3985	4041	3956	4023.8		3993	4133	4087	4211	4252	4135.2		4118	4240	4239	4284	4335	4243.2		4050	4166	4007	4062	4008	4058.6		3791	3865	3628	3682	3877	3768.6		3548	3509	3540	3519	3530	3529.2		3305	3374	3329	3378	3365	3350.2
449	4014	4158	4000	4055	3961	4037.6		4006	4153	4101	4229	4265	4150.8		4133	4255	4256	4298	4346	4257.6		4055	4181	4026	4078	4026	4073.2		3800	3875	3638	3697	3892	3780.4		3556	3518	3553	3535	3545	3541.4		3318	3387	3336	3386	3372	3359.8
450	4025	4181	4018	4071	3973	4053.6		4017	4165	4113	4243	4279	4163.4		4148	4272	4270	4322	4361	4274.6		4068	4189	4040	4096	4037	4086		3818	3885	3653	3721	3901	3795.6		3572	3528	3566	3547	3559	3554.4		3329	3397	3351	3398	3390	3373
451	4039	4192	4027	4090	3986	4066.8		4034	4184	4124	4256	4283	4176.2		4164	4291	4287	4336	4371	4289.8		4080	4202	4054	4116	4049	4100.2		3832	3900	3667	3728	3915	3808.4		3586	3538	3576	3558	3577	3567		3340	3412	3360	3412	3403	3385.4
452	4051	4209	4044	4105	4005	4082.8		4052	4198	4134	4272	4299	4191		4180	4301	4301	4353	4388	4304.6		4092	4218	4068	4131	4058	4113.4		3843	3915	3683	3736	3925	3820.4		3594	3546	3585	3566	3586	3575.4		3348	3419	3371	3419	3418	3395
453	4068	4225	4066	4122	4012	4098.6		4060	4208	4144	4293	4318	4204.6		4195	4312	4319	4361	4401	4317.6		4107	4227	4089	4147	4072	4128.4		3860	3931	3694	3746	3937	3833.6		3605	3562	3595	3578	3598	3587.6		3362	3429	3387	3435	3428	3408.2
454	4081	4238	4078	4130	4026	4110.6		4070	4222	4160	4310	4331	4218.6		4213	4330	4329	4386	4416	4334.8		4124	4239	4099	4166	4082	4142		3875	3946	3701	3759	3962	3848.6		3621	3575	3608	3589	3610	3600.6		3373	3447	3400	3452	3438	3422
455	4094	4256	4088	4148	4041	4125.4		4086	4241	4175	4321	4350	4234.6		4227	4351	4343	4399	4433	4350.6		4146	4263	4117	4184	4097	4161.4		3890	3959	3718	3775	3974	3863.2		3634	3584	3618	3602	3627	3613		3382	3460	3409	3468	3452	3434.2
456	4110	4264	4106	4167	4057	4140.8		4101	4259	4184	4340	4359	4248.6		4245	4367	4359	4422	4448	4368.2		4159	4280	4138	4200	4109	4177.2		3900	3965	3731	3781	3978	3871		3643	3591	3635	3615	3635	3623.8		3396	3463	3418	3482	3463	3444.4
457	4118	4276	4116	4179	4072	4152.2		4119	4274	4200	4357	4377	4265.4		4256	4381	4381	4441	4474	4386.6		4183	4294	4149	4212	4117	4191		3912	3975	3746	3794	3986	3882.6		3654	3612	3649	3627	3654	3639.2		3403	3467	3428	3487	3481	3453.2
458	4135	4288	4127	4191	4087	4165.6		4145	4302	4218	4379	4401	4289		4272	4398	4392	4457	4490	4401.8		4206	4310	4163	4229	4126	4206.8		3929	3987	3757	3806	4004	3896.6		3661	3624	3664	3639	3666	3650.8		3406	3483	3440	3497	3493	3463.8
459	4144	4303	4144	4212	4111	4182.8		4163	4325	4229	4394	4412	4304.6		4289	4419	4406	4472	4503	4417.8		4217	4336	4181	4246	4131	4222.2		3945	4000	3770	3817	4014	3909.2		3672	3634	3676	3657	3672	3662.2		3414	3492	3454	3518	3505	3476.6
460	4163	4316	4161	4226	4131	4199.4		4175	4342	4253	4406	4425	4320.2		4304	4431	4425	4490	4520	4434		4228	4353	4194	4261	4143	4235.8		3957	4021	3779	3831	4026	3922.8		3689	3652	3692	3667	3678	3675.6		3419	3500	3463	3528	3516	3485.2
461	4183	4328	4182	4241	4146	4216		4194	4354	4277	4423	4440	4337.6		4326	4445	4437	4502	4537	4449.4		4241	4378	4217	4278	4156	4254		3968	4035	3785	3840	4040	3933.6		3701	3666	3701	3682	3690	3688		3432	3512	3468	3541	3524	3495.4
462	4195	4343	4196	4259	4160	4230.6		4210	4369	4287	4439	4455	4352		4341	4464	4453	4528	4559	4469		4257	4390	4242	4292	4170	4270.2		3978	4043	3795	3858	4057	3946.2		3715	3684	3712	3687	3697	3699		3441	3518	3479	3554	3535	3505.4
463	4212	4361	4209	4274	4169	4245		4232	4375	4300	4449	4468	4364.8		4361	4479	4474	4545	4576	4487		4272	4410	4257	4312	4185	4287.2		3990	4051	3817	3866	4063	3957.4		3733	3696	3725	3699	3713	3713.2		3449	3530	3486	3568	3552	3517
464	4229	4379	4226	4287	4184	4261		4245	4387	4313	4464	4488	4379.4		4375	4495	4488	4572	4593	4504.6		4286	4425	4265	4327	4204	4301.4		4002	4060	3833	3878	4087	3972		3743	3708	3738	3714	3720	3724.6		3458	3541	3495	3579	3564	3527.4
465	4247	4394	4244	4305	4194	4276.8		4257	4399	4332	4484	4504	4395.2		4390	4505	4500	4588	4612	4519		4297	4442	4282	4343	4213	4315.4		4008	4077	3842	3891	4100	3983.6		3760	3725	3760	3728	3730	3740.6		3468	3556	3505	3592	3577	3539.6
466	4259	4416	4254	4319	4201	4289.8		4272	4410	4346	4498	4521	4409.4		4404	4520	4521	4611	4630	4537.2		4321	4455	4294	4354	4226	4330		4019	4090	3853	3906	4113	3996.2		3776	3738	3771	3741	3738	3752.8		3474	3567	3513	3610	3586	3550
467	4274	4429	4267	4343	4217	4306		4287	4433	4372	4518	4537	4429.4		4422	4542	4536	4633	4647	4556		4335	4473	4305	4370	4243	4345.2		4033	4102	3865	3920	4122	4008.4		3786	3747	3787	3751	3755	3765.2		3484	3579	3523	3617	3600	3560.6
468	4293	4452	4279	4364	4235	4324.6		4306	4456	4387	4539	4554	4448.4		4439	4551	4551	4654	4662	4571.4		4357	4493	4318	4386	4258	4362.4		4045	4117	3880	3939	4136	4023.4		3803	3762	3806	3756	3765	3778.4		3492	3592	3537	3631	3613	3573
469	4316	4467	4297	4379	4257	4343.2		4318	4470	4403	4547	4570	4461.6		4462	4566	4570	4668	4682	4589.6		4380	4512	4336	4402	4271	4380.2		4066	4137	3889	3954	4146	4038.4		3818	3779	3816	3770	3775	3791.6		3501	3603	3548	3650	3630	3586.4
470	4332	4489	4311	4395	4276	4360.6		4330	4488	4421	4562	4585	4477.2		4480	4586	4590	4688	4701	4609		4395	4523	4352	4425	4288	4396.6		4077	4149	3904	3968	4161	4051.8		3832	3792	3826	3782	3787	3803.8		3510	3610	3557	3657	3637	3594.2
471	4348	4501	4330	4406	4294	4375.8		4346	4502	4431	4575	4605	4491.8		4500	4608	4601	4705	4712	4625.2		4416	4542	4365	4443	4301	4413.4		4100	4164	3925	3984	4175	4069.6		3848	3803	3840	3805	3798	3818.8		3523	3616	3571	3674	3644	3605.6
472	4363	4516	4343	4420	4309	4390.2		4366	4518	4444	4588	4628	4508.8		4524	4622	4619	4717	4731	4642.6		4434	4561	4379	4459	4325	4431.6		4110	4182	3936	3997	4189	4082.8		3858	3811	3851	3813	3805	3827.6		3527	3624	3580	3678	3652	3612.2
473	4384	4536	4352	4434	4322	4405.6		4380	4532	4458	4617	4642	4525.8		4547	4640	4630	4742	4753	4662.4		4450	4579	4395	4473	4341	4447.6		4125	4200	3949	4007	4210	4098.2		3875	3816	3859	3830	3817	3839.4		3542	3637	3594	3689	3668	3626
474	4397	4555	4367	4447	4334	4420		4399	4554	4475	4632	4657	4543.4		4563	4652	4647	4763	4766	4678.2		4462	4587	4406	4490	4360	4461		4144	4208	3968	4023	4225	4113.6		3885	3833	3870	3839	3829	3851.2		3554	3653	3604	3698	3678	3637.4
475	4409	4572	4380	4456	4351	4433.6		4415	4571	4487	4647	4677	4559.4		4575	4667	4663	4786	4784	4695		4475	4609	4420	4509	4376	4477.8		4160	4219	3977	4044	4232	4126.4		3896	3850	3881	3848	3842	3863.4		3569	3665	3616	3714	3692	3651.2
476	4418	4591	4391	4466	4374	4448		4428	4583	4506	4670	4701	4577.6		4591	4683	4686	4796	4803	4711.8		4497	4628	4437	4527	4388	4495.4		4189	4231	3989	4059	4243	4142.2		3914	3861	3900	3868	3852	3879		3580	3676	3628	3732	3705	3664.2
477	4438	4604	4408	4479	4393	4464.4		4443	4598	4524	4700	4712	4595.4		4612	4696	4699	4805	4820	4726.4		4511	4641	4460	4547	4407	4513.2		4198	4246	4001	4067	4257	4153.8		3927	3870	3911	3882	3865	3891		3590	3685	3639	3741	3714	3673.8
478	4459	4628	4426	4494	4408	4483		4465	4614	4532	4720	4725	4611.2		4629	4712	4717	4830	4839	4745.4		4538	4661	4480	4561	4420	4532		4215	4265	4006	4086	4273	4169		3945	3881	3913	3890	3878	3901.4		3599	3697	3647	3751	3727	3684.2
479	4474	4639	4443	4511	4422	4497.8		4480	4630	4541	4738	4739	4625.6		4655	4728	4731	4854	4854	4764.4		4555	4677	4498	4578	4437	4549		4229	4286	4022	4099	4290	4185.2		3961	3898	3927	3909	3894	3917.8		3609	3705	3660	3760	3740	3694.8
480	4491	4659	4459	4537	4437	4516.6		4497	4646	4562	4759	4751	4643		4678	4744	4753	4875	4869	4783.8		4577	4682	4514	4588	4451	4562.4		4241	4303	4036	4114	4304	4199.6		3977	3909	3947	3924	3912	3933.8		3618	3716	3669	3771	3751	3705
481	4505	4683	4483	4555	4461	4537.4		4528	4665	4577	4777	4770	4663.4		4697	4757	4770	4885	4887	4799.2		4600	4695	4530	4605	4469	4579.8		4256	4329	4054	4125	4319	4216.6		3988	3921	3959	3934	3920	3944.4		3630	3733	3684	3783	3758	3717.6
482	4523	4696	4497	4569	4478	4552.6		4545	4685	4595	4790	4787	4680.4		4708	4774	4789	4903	4899	4814.6		4624	4707	4543	4618	4483	4595		4278	4344	4070	4135	4334	4232.2		3996	3941	3971	3951	3928	3957.4		3640	3749	3696	3799	3772	3731.2
483	4543	4716	4516	4590	4496	4572.2		4567	4696	4617	4803	4801	4696.8		4726	4797	4798	4919	4917	4831.4		4641	4723	4559	4636	4496	4611		4293	4362	4081	4147	4347	4246		4015	3958	3985	3963	3943	3972.8		3651	3764	3712	3811	3779	3743.4
484	4559	4735	4534	4610	4518	4591.2		4586	4714	4641	4823	4823	4717.4		4740	4819	4811	4935	4940	4849		4656	4746	4579	4657	4510	4629.6		4311	4382	4099	4160	4368	4264		4029	3969	3995	3973	3960	3985.2		3660	3781	3721	3822	3792	3755.2
485	4580	4747	4555	4619	4531	4606.4		4602	4734	4657	4836	4846	4735		4770	4831	4827	4957	4959	4868.8		4669	4756	4599	4673	4527	4644.8		4321	4394	4113	4167	4386	4276.2		4040	3982	4010	3992	3974	3999.6		3668	3793	3729	3835	3807	3766.4
486	4593	4758	4578	4641	4547	4623.4		4621	4757	4675	4848	4865	4753.2		4784	4847	4847	4975	4978	4886.2		4682	4767	4611	4689	4541	4658		4340	4410	4133	4184	4399	4293.2		4047	3995	4023	4004	3988	4011.4		3678	3805	3745	3842	3827	3779.4
487	4610	4775	4596	4657	4562	4640		4641	4770	4691	4862	4889	4770.6		4800	4865	4863	4995	4998	4904.2		4704	4784	4626	4703	4561	4675.6		4356	4422	4149	4203	4418	4309.6		4060	4008	4039	4020	4002	4025.8		3689	3816	3753	3853	3845	3791.2
488	4626	4790	4609	4678	4584	4657.4		4665	4795	4713	4876	4906	4791		4825	4883	4887	5008	5011	4922.8		4715	4798	4643	4724	4580	4692		4369	4434	4159	4221	4432	4323		4075	4017	4047	4026	4012	4035.4		3705	3825	3764	3865	3860	3803.8
489	4639	4811	4625	4697	4602	4674.8		4686	4818	4740	4895	4926	4813		4837	4907	4911	5030	5034	4943.8		4729	4815	4658	4745	4593	4708		4382	4452	4178	4233	4448	4338.6		4086	4035	4055	4035	4028	4047.8		3726	3843	3780	3881	3873	3820.6
490	4661	4826	4646	4708	4627	4693.6		4707	4836	4753	4913	4943	4830.4		4859	4927	4933	5044	5054	4963.4		4746	4842	4678	4764	4605	4727		4399	4474	4194	4244	4469	4356		4099	4047	4062	4055	4042	4061		3738	3848	3795	3895	3885	3832.2
491	4680	4848	4661	4722	4649	4712		4728	4850	4767	4925	4954	4844.8		4883	4945	4963	5074	5068	4986.6		4759	4856	4688	4778	4620	4740.2		4416	4488	4212	4261	4485	4372.4		4109	4066	4073	4069	4052	4073.8		3749	3853	3806	3910	3900	3843.6
492	4692	4865	4681	4751	4673	4732.4		4751	4864	4787	4943	4977	4864.4		4901	4968	4982	5098	5090	5007.8		4777	4878	4702	4787	4633	4755.4		4434	4506	4221	4278	4500	4387.8		4127	4080	4090	4092	4064	4090.6		3754	3857	3817	3919	3915	3852.4
493	4713	4886	4694	4765	4685	4748.6		4767	4878	4800	4966	5002	4882.6		4914	4977	5003	5111	5111	5023.2		4792	4902	4719	4807	4657	4775.4		4440	4527	4232	4296	4515	4402		4141	4092	4099	4107	4072	4102.2		3763	3866	3829	3929	3929	3863.2
494	4732	4907	4711	4784	4698	4766.4		4780	4887	4813	4983	5020	4896.6		4932	4996	5025	5135	5122	5042		4807	4916	4741	4826	4677	4793.4		4452	4548	4240	4306	4524	4414		4155	4104	4110	4125	4091	4117		3781	3875	3837	3942	3941	3875.2
495	4753	4926	4736	4800	4711	4785.2		4794	4895	4831	5000	5044	4912.8		4957	5016	5042	5157	5135	5061.4		4823	4937	4762	4848	4691	4812.2		4469	4569	4249	4320	4539	4429.2		4174	4121	4124	4140	4108	4133.4		3800	3888	3848	3952	3953	3888.2
496	4776	4940	4747	4819	4731	4802.6		4815	4914	4849	5017	5068	4932.6		4970	5039	5062	5176	5153	5080		4836	4957	4778	4859	4709	4827.8		4480	4583	4263	4340	4545	4442.2		4190	4139	4138	4150	4126	4148.6		3814	3897	3866	3965	3973	3903
497	4797	4955	4761	4836	4752	4820.2		4836	4934	4870	5031	5091	4952.4		4991	5069	5076	5195	5184	5103		4855	4973	4791	4875	4736	4846		4494	4597	4283	4355	4557	4457.2		4207	4151	4147	4169	4137	4162.2		3833	3918	3883	3977	3987	3919.6
498	4821	4972	4774	4853	4769	4837.8		4856	4947	4882	5046	5117	4969.6		5003	5091	5089	5213	5199	5119		4871	4985	4806	4895	4756	4862.6		4509	4618	4299	4366	4569	4472.2		4225	4175	4159	4189	4153	4180.2		3850	3931	3901	3999	3999	3936
499	4839	4992	4796	4875	4793	4859		4874	4966	4896	5065	5143	4988.8		5023	5111	5111	5228	5216	5137.8		4891	5004	4825	4908	4773	4880.2		4534	4635	4320	4381	4589	4491.8		4239	4189	4178	4208	4161	4195		3864	3943	3910	4015	4009	3948.2
500	4852	5010	4825	4893	4813	4878.6		4899	4988	4916	5077	5163	5008.6		5044	5123	5137	5251	5238	5158.6		4905	5024	4840	4935	4785	4897.8		4544	4656	4340	4392	4606	4507.6		4253	4207	4189	4222	4180	4210.2		3873	3958	3921	4033	4015	3960
501	4865	5034	4845	4911	4836	4898.2		4916	5011	4940	5101	5185	5030.6		5062	5139	5160	5267	5247	5175		4919	5047	4860	4954	4802	4916.4		4565	4669	4357	4401	4627	4523.8		4267	4218	4205	4233	4188	4222.2		3879	3971	3929	4039	4042	3972
502	4883	5058	4863	4934	4856	4918.8		4934	5031	4966	5123	5207	5052.2		5088	5156	5180	5289	5259	5194.4		4940	5067	4878	4981	4820	4937.2		4579	4685	4375	4424	4643	4541.2		4281	4230	4216	4242	4205	4234.8		3895	3982	3935	4053	4053	3983.6
503	4902	5072	4881	4952	4872	4935.8		4951	5052	4982	5140	5217	5068.4		5105	5174	5204	5307	5277	5213.4		4962	5080	4892	4995	4840	4953.8		4597	4704	4391	4445	4657	4558.8		4298	4250	4227	4254	4225	4250.8		3909	3993	3942	4069	4063	3995.2
504	4921	5089	4903	4961	4903	4955.4		4970	5070	5003	5161	5237	5088.2		5131	5199	5214	5315	5299	5231.6		4980	5098	4906	5011	4855	4970		4619	4728	4411	4460	4672	4578		4308	4267	4242	4268	4238	4264.6		3916	4004	3950	4082	4078	4006
505	4933	5102	4920	4991	4927	4974.6		4995	5084	5029	5178	5263	5109.8		5148	5227	5236	5330	5318	5251.8		4996	5115	4924	5028	4876	4987.8		4638	4748	4419	4486	4690	4596.2		4334	4284	4262	4281	4260	4284.2		3923	4012	3960	4099	4090	4016.8
506	4959	5122	4931	5009	4945	4993.2		5019	5100	5042	5196	5292	5129.8		5158	5244	5249	5346	5333	5266		5013	5132	4939	5047	4885	5003.2		4649	4761	4432	4504	4710	4611.2		4346	4290	4285	4290	4273	4296.8		3934	4025	3972	4108	4102	4028.2
507	4974	5145	4952	5026	4971	5013.6		5045	5127	5056	5218	5313	5151.8		5181	5267	5261	5372	5351	5286.4		5039	5152	4952	5072	4907	5024.4		4662	4782	4448	4522	4726	4628		4362	4303	4301	4309	4284	4311.8		3950	4038	3983	4131	4115	4043.4
508	4996	5169	4969	5051	4993	5035.6		5068	5140	5071	5235	5328	5168.4		5200	5283	5273	5389	5367	5302.4		5056	5173	4969	5087	4922	5041.4		4677	4802	4461	4539	4745	4644.8		4374	4322	4317	4324	4300	4327.4		3970	4052	3999	4142	4127	4058
509	5015	5183	4987	5071	5012	5053.6		5088	5158	5094	5260	5343	5188.6		5214	5300	5292	5418	5395	5323.8		5071	5191	4992	5107	4939	5060		4696	4814	4471	4556	4765	4660.4		4391	4339	4343	4336	4321	4346		3979	4069	4019	4161	4137	4073
510	5034	5196	5000	5086	5030	5069.2		5113	5173	5116	5289	5364	5211		5230	5322	5309	5437	5413	5342.2		5100	5214	5014	5131	4951	5082		4713	4838	4492	4572	4786	4680.2		4404	4354	4356	4348	4329	4358.2		3988	4079	4030	4172	4153	4084.4
511	5054	5222	5014	5103	5051	5088.8		5133	5189	5134	5304	5387	5229.4		5241	5349	5323	5455	5428	5359.2		5122	5230	5037	5157	4965	5102.2		4734	4852	4506	4591	4803	4697.2		4421	4365	4375	4356	4340	4371.4		4009	4104	4042	4190	4171	4103.2
512	5071	5241	5026	5115	5066	5103.8		5156	5214	5157	5331	5406	5252.8		5258	5363	5344	5471	5452	5377.6		5137	5242	5055	5176	4986	5119.2		4756	4872	4523	4609	4823	4716.6		4433	4382	4390	4369	4351	4385		4026	4111	4059	4202	4183	4116.2
513	5089	5264	5044	5145	5091	5126.6		5183	5228	5179	5347	5427	5272.8		5278	5381	5369	5484	5479	5398.2		5160	5265	5083	5193	5015	5143.2		4772	4899	4539	4627	4832	4733.8		4446	4397	4405	4381	4365	4398.8		4040	4126	4072	4223	4195	4131.2
514	5102	5282	5064	5161	5110	5143.8		5203	5241	5196	5364	5440	5288.8		5293	5391	5387	5508	5501	5416		5175	5282	5099	5211	5033	5160		4781	4920	4556	4644	4843	4748.8		4463	4413	4416	4388	4378	4411.6		4055	4135	4078	4238	4206	4142.4
515	5118	5301	5083	5176	5131	5161.8		5223	5256	5221	5384	5457	5308.2		5313	5410	5403	5517	5512	5431		5191	5296	5122	5230	5052	5178.2		4795	4938	4575	4658	4857	4764.6		4469	4431	4429	4401	4390	4424		4068	4156	4090	4251	4217	4156.4
516	5136	5329	5105	5198	5145	5182.6		5250	5271	5242	5403	5475	5328.2		5332	5430	5427	5549	5531	5453.8		5212	5313	5145	5253	5076	5199.8		4814	4966	4590	4678	4874	4784.4		4480	4437	4446	4411	4405	4435.8		4086	4168	4098	4263	4244	4171.8
517	5148	5348	5123	5222	5165	5201.2		5272	5296	5262	5424	5489	5348.6		5343	5451	5452	5565	5549	5472		5230	5330	5170	5272	5100	5220.4		4836	4975	4608	4694	4887	4800		4496	4457	4462	4434	4432	4456.2		4106	4177	4114	4281	4263	4188.2
518	5163	5363	5145	5244	5181	5219.2		5290	5311	5284	5440	5508	5366.6		5368	5479	5470	5584	5562	5492.6		5245	5345	5187	5292	5123	5238.4		4855	4992	4619	4705	4902	4814.6		4511	4466	4472	4451	4452	4470.4		4110	4190	4129	4293	4284	4201.2
519	5180	5383	5161	5266	5200	5238		5310	5333	5301	5464	5528	5387.2		5387	5499	5488	5599	5586	5511.8		5259	5369	5211	5305	5146	5258		4872	5014	4633	4721	4916	4831.2		4516	4474	4485	4469	4463	4481.4		4128	4206	4142	4303	4295	4214.8
520	5203	5403	5185	5288	5221	5260		5328	5356	5319	5480	5540	5404.6		5403	5517	5510	5617	5599	5529.2		5287	5388	5225	5324	5165	5277.8		4891	5030	4648	4736	4937	4848.4		4533	4491	4495	4485	4484	4497.6		4137	4221	4154	4309	4305	4225.2
521	5224	5418	5208	5304	5241	5279		5343	5380	5336	5495	5564	5423.6		5422	5528	5533	5636	5617	5547.2		5307	5408	5247	5346	5184	5298.4		4914	5046	4660	4748	4951	4863.8		4554	4512	4501	4495	4499	4512.2		4158	4246	4175	4325	4317	4244.2
522	5247	5439	5229	5327	5258	5300		5359	5406	5352	5513	5583	5442.6		5449	5550	5558	5658	5627	5568.4		5332	5430	5263	5359	5193	5315.4		4933	5061	4672	4765	4969	4880		4570	4524	4519	4508	4509	4526		4180	4259	4190	4339	4330	4259.6
523	5276	5460	5240	5338	5276	5318		5376	5418	5363	5530	5612	5459.8		5469	5570	5575	5675	5647	5587.2		5368	5448	5275	5376	5215	5336.4		4952	5077	4686	4775	4988	4895.6		4579	4541	4531	4520	4533	4540.8		4192	4272	4203	4349	4345	4272.2
524	5293	5477	5270	5359	5296	5339		5403	5429	5380	5550	5638	5480		5493	5585	5599	5708	5664	5609.8		5384	5467	5293	5392	5231	5353.4		4966	5098	4707	4793	5004	4913.6		4590	4554	4546	4535	4545	4554		4203	4291	4216	4362	4356	4285.6
525	5315	5499	5302	5378	5316	5362		5422	5445	5395	5572	5658	5498.4		5518	5604	5615	5725	5688	5630		5404	5487	5309	5413	5252	5373		4985	5118	4722	4811	5025	4932.2		4613	4572	4557	4544	4556	4568.4		4221	4309	4233	4373	4367	4300.6
526	5335	5527	5326	5402	5339	5385.8		5452	5474	5418	5591	5677	5522.4		5533	5620	5639	5745	5705	5648.4		5420	5511	5334	5432	5274	5394.2		4999	5130	4743	4827	5037	4947.2		4630	4585	4563	4553	4565	4579.2		4235	4322	4245	4386	4384	4314.4
527	5356	5547	5346	5418	5363	5406		5469	5502	5436	5608	5704	5543.8		5549	5640	5659	5763	5722	5666.6		5443	5537	5349	5453	5288	5414		5014	5142	4759	4844	5049	4961.6		4646	4601	4579	4566	4580	4594.4		4247	4332	4253	4401	4397	4326
528	5383	5567	5361	5438	5381	5426		5485	5523	5449	5629	5721	5561.4		5565	5655	5672	5780	5741	5682.6		5450	5554	5371	5475	5310	5432		5030	5159	4772	4864	5059	4976.8		4669	4616	4594	4581	4599	4611.8		4262	4352	4269	4409	4415	4341.4
529	5411	5580	5373	5455	5403	5444.4		5490	5543	5466	5650	5735	5576.8		5592	5677	5689	5796	5763	5703.4		5468	5572	5385	5492	5332	5449.8		5051	5181	4789	4879	5068	4993.6		4686	4630	4610	4598	4619	4628.6		4270	4369	4289	4424	4426	4355.6
530	5430	5597	5394	5474	5423	5463.6		5508	5556	5482	5661	5756	5592.6		5610	5697	5705	5810	5776	5719.6		5489	5602	5394	5519	5350	5470.8		5073	5193	4807	4901	5080	5010.8		4699	4643	4622	4615	4631	4642		4279	4377	4303	4445	4440	4368.8
531	5449	5616	5408	5497	5436	5481.2		5529	5573	5498	5679	5774	5610.6		5630	5712	5720	5829	5795	5737.2		5509	5624	5406	5546	5367	5490.4		5096	5213	4821	4916	5100	5029.2		4711	4656	4640	4630	4646	4656.6		4294	4387	4317	4451	4449	4379.6
532	5470	5632	5430	5518	5450	5500		5550	5595	5516	5695	5788	5628.8		5648	5727	5743	5858	5820	5759.2		5531	5638	5433	5557	5386	5509		5107	5230	4841	4930	5120	5045.6		4733	4672	4659	4639	4666	4673.8		4307	4401	4327	4464	4469	4393.6
533	5481	5646	5459	5544	5467	5519.4		5569	5613	5539	5709	5812	5648.4		5664	5737	5757	5877	5836	5774.2		5550	5656	5451	5576	5404	5527.4		5130	5247	4862	4944	5139	5064.4		4745	4687	4669	4650	4682	4686.6		4319	4411	4340	4483	4478	4406.2
534	5500	5672	5475	5560	5481	5537.6		5587	5628	5563	5736	5833	5669.4		5682	5765	5775	5902	5855	5795.8		5573	5680	5472	5594	5418	5547.4		5145	5265	4878	4958	5155	5080.2		4755	4698	4693	4663	4699	4701.6		4336	4429	4350	4503	4494	4422.4
535	5523	5694	5493	5585	5502	5559.4		5611	5643	5588	5758	5858	5691.6		5696	5793	5790	5925	5875	5815.8		5590	5701	5486	5615	5429	5564.2		5157	5286	4891	4976	5167	5095.4		4770	4712	4722	4683	4716	4720.6		4353	4445	4370	4521	4504	4438.6
536	5551	5715	5519	5598	5523	5581.2		5633	5673	5610	5774	5870	5712		5724	5814	5807	5942	5897	5836.8		5603	5713	5504	5637	5456	5582.6		5178	5303	4902	4989	5187	5111.8		4792	4731	4740	4692	4737	4738.4		4364	4461	4384	4544	4519	4454.4
537	5572	5745	5540	5626	5547	5606		5656	5688	5633	5803	5892	5734.4		5739	5828	5836	5955	5913	5854.2		5623	5731	5526	5655	5479	5602.8		5192	5323	4924	5004	5203	5129.2		4808	4745	4761	4704	4750	4753.6		4374	4476	4396	4558	4528	4466.4
538	5594	5773	5553	5644	5561	5625		5677	5703	5654	5827	5902	5752.6		5752	5844	5851	5974	5929	5870		5649	5746	5555	5676	5488	5622.8		5215	5350	4942	5021	5227	5151		4824	4754	4775	4719	4772	4768.8		4389	4485	4407	4578	4551	4482
539	5609	5794	5568	5661	5588	5644		5698	5725	5668	5853	5928	5774.4		5772	5866	5874	5997	5956	5893		5675	5762	5568	5693	5505	5640.6		5238	5370	4963	5040	5248	5171.8		4846	4775	4799	4732	4794	4789.2		4402	4492	4422	4591	4566	4494.6
540	5640	5815	5580	5681	5605	5664.2		5715	5740	5691	5874	5952	5794.4		5793	5889	5900	6020	5984	5917.2		5697	5786	5591	5720	5523	5663.4		5255	5391	4976	5065	5260	5189.4		4858	4793	4815	4748	4810	4804.8		4408	4501	4439	4600	4584	4506.4
541	5665	5839	5602	5693	5631	5686		5729	5757	5706	5900	5969	5812.2		5811	5915	5915	6046	6011	5939.6		5713	5805	5609	5737	5547	5682.2		5273	5411	4995	5091	5273	5208.6		4876	4810	4830	4769	4837	4824.4		4422	4518	4460	4626	4595	4524.2
542	5693	5869	5624	5724	5662	5714.4		5751	5782	5723	5922	5991	5833.8		5840	5929	5932	6066	6029	5959.2		5736	5817	5630	5763	5570	5703.2		5287	5436	5020	5108	5292	5228.6		4882	4822	4843	4788	4855	4838		4432	4532	4478	4647	4607	4539.2
543	5702	5893	5642	5751	5680	5733.6		5762	5795	5734	5952	6006	5849.8		5857	5949	5952	6085	6048	5978.2		5763	5840	5656	5779	5585	5724.6		5299	5453	5040	5130	5311	5246.6		4896	4841	4862	4809	4879	4857.4		4448	4543	4493	4664	4619	4553.4
544	5721	5912	5660	5778	5697	5753.6		5787	5815	5754	5970	6031	5871.4		5870	5970	5973	6100	6070	5996.6		5786	5864	5674	5801	5613	5747.6		5314	5472	5054	5145	5325	5262		4907	4864	4880	4830	4901	4876.4		4456	4565	4501	4678	4634	4566.8
545	5740	5929	5672	5792	5711	5768.8		5808	5828	5781	5991	6054	5892.4		5894	5994	6003	6127	6086	6020.8		5803	5885	5689	5820	5630	5765.4		5332	5493	5072	5165	5345	5281.4		4925	4876	4894	4844	4924	4892.6		4475	4580	4513	4696	4646	4582
546	5765	5951	5692	5808	5736	5790.4		5828	5848	5800	6014	6073	5912.6		5908	6012	6028	6138	6106	6038.4		5822	5910	5710	5842	5649	5786.6		5352	5510	5095	5184	5370	5302.2		4942	4894	4910	4859	4936	4908.2		4491	4596	4534	4707	4661	4597.8
547	5782	5964	5715	5825	5763	5809.8		5844	5867	5817	6029	6095	5930.4		5920	6027	6047	6152	6138	6056.8		5834	5934	5735	5862	5668	5806.6		5361	5526	5109	5204	5386	5317.2		4965	4914	4924	4876	4957	4927.2		4505	4607	4546	4714	4677	4609.8
548	5803	5988	5750	5844	5782	5833.4		5865	5885	5834	6045	6112	5948.2		5940	6051	6079	6173	6166	6081.8		5857	5950	5751	5879	5685	5824.4		5380	5544	5131	5222	5402	5335.8		4981	4928	4938	4898	4977	4944.4		4519	4623	4563	4735	4690	4626
549	5822	6009	5781	5873	5802	5857.4		5881	5910	5855	6076	6138	5972		5955	6073	6106	6191	6177	6100.4		5870	5977	5767	5900	5704	5843.6		5395	5557	5150	5243	5414	5351.8		4995	4946	4947	4913	4992	4958.6		4532	4639	4575	4750	4704	4640
550	5842	6039	5805	5887	5813	5877.2		5894	5929	5882	6102	6154	5992.2		5972	6091	6126	6215	6194	6119.6		5885	6001	5785	5917	5722	5862		5413	5570	5169	5256	5430	5367.6		5016	4959	4962	4928	5010	4975		4542	4649	4587	4768	4712	4651.6
551	5857	6054	5824	5897	5838	5894		5916	5949	5904	6120	6182	6014.2		5994	6119	6145	6240	6223	6144.2		5902	6025	5809	5936	5743	5883		5429	5594	5183	5266	5454	5385.2		5030	4971	4974	4939	5018	4986.4		4555	4671	4603	4784	4728	4668.2
552	5876	6072	5841	5922	5862	5914.6		5943	5973	5922	6147	6197	6036.4		6012	6144	6167	6261	6240	6164.8		5923	6051	5827	5953	5767	5904.2		5449	5619	5200	5281	5469	5403.6		5044	4984	4991	4954	5030	5000.6		4571	4687	4616	4793	4747	4682.8
553	5901	6096	5860	5941	5883	5936.2		5961	5994	5942	6168	6220	6057		6029	6166	6181	6280	6269	6185		5944	6074	5841	5968	5793	5924		5457	5647	5220	5299	5490	5422.6		5061	4995	5013	4972	5049	5018		4590	4704	4631	4811	4773	4701.8
554	5919	6120	5890	5956	5903	5957.6		5979	6016	5961	6188	6235	6075.8		6049	6189	6201	6306	6292	6207.4		5964	6091	5861	5987	5817	5944		5477	5671	5234	5312	5512	5441.2		5072	5006	5028	4996	5064	5033.2		4601	4721	4641	4827	4783	4714.6
555	5943	6145	5907	5970	5927	5978.4		5994	6040	5988	6207	6253	6096.4		6060	6212	6228	6320	6306	6225.2		5986	6110	5885	6002	5837	5964		5496	5689	5254	5330	5531	5460		5091	5020	5049	5013	5084	5051.4		4617	4733	4655	4840	4793	4727.6
556	5970	6169	5931	5993	5942	6001		6015	6056	6013	6228	6276	6117.6		6075	6237	6244	6341	6330	6245.4		6004	6138	5904	6018	5853	5983.4		5518	5711	5277	5352	5555	5482.6		5115	5041	5066	5027	5104	5070.6		4636	4756	4664	4862	4808	4745.2
557	5997	6186	5950	6014	5966	6022.6		6034	6074	6038	6256	6303	6141		6095	6258	6263	6364	6353	6266.6		6023	6154	5923	6037	5876	6002.6		5537	5725	5297	5376	5578	5502.6		5131	5054	5087	5047	5121	5088		4653	4768	4688	4878	4822	4761.8
558	6013	6212	5964	6039	5980	6041.6		6048	6096	6061	6267	6324	6159.2		6117	6281	6281	6387	6375	6288.2		6045	6172	5937	6059	5903	6023.2		5558	5741	5310	5394	5596	5519.8		5144	5079	5104	5063	5131	5104.2		4670	4783	4704	4893	4836	4777.2
559	6029	6231	5976	6054	6007	6059.4		6064	6121	6075	6294	6348	6180.4		6133	6307	6305	6407	6403	6311		6069	6191	5949	6073	5933	6043		5582	5761	5334	5412	5623	5542.4		5156	5096	5121	5081	5149	5120.6		4683	4797	4712	4903	4855	4790
560	6056	6247	6002	6074	6029	6081.6		6083	6140	6097	6311	6378	6201.8		6155	6324	6317	6422	6424	6328.4		6088	6208	5968	6099	5952	6063		5608	5780	5359	5428	5647	5564.4		5171	5117	5147	5092	5160	5137.4		4698	4813	4726	4912	4873	4804.4
561	6080	6270	6025	6100	6044	6103.8		6107	6161	6120	6336	6394	6223.6		6169	6343	6337	6441	6446	6347.2		6109	6247	5987	6116	5970	6085.8		5631	5802	5380	5444	5669	5585.2		5195	5137	5165	5104	5176	5155.4		4706	4829	4750	4929	4892	4821.2
562	6100	6291	6046	6120	6067	6124.8		6123	6184	6142	6359	6417	6245		6186	6358	6358	6455	6463	6364		6123	6272	6013	6136	5996	6108		5656	5821	5397	5460	5687	5604.2		5216	5158	5194	5128	5198	5178.8		4715	4846	4766	4949	4908	4836.8
563	6119	6313	6071	6140	6090	6146.6		6138	6202	6164	6378	6442	6264.8		6199	6376	6378	6479	6484	6383.2		6138	6285	6041	6158	6010	6126.4		5673	5841	5415	5479	5698	5621.2		5233	5178	5208	5151	5217	5197.4		4724	4856	4781	4969	4925	4851
564	6143	6331	6091	6161	6113	6167.8		6156	6223	6184	6401	6462	6285.2		6206	6401	6397	6509	6508	6404.2		6152	6309	6062	6184	6031	6147.6		5697	5861	5432	5495	5708	5638.6		5250	5196	5218	5169	5234	5213.4		4738	4875	4795	4985	4938	4866.2
565	6165	6360	6108	6187	6135	6191		6171	6243	6195	6420	6474	6300.6		6214	6418	6426	6532	6526	6423.2		6176	6337	6073	6201	6054	6168.2		5726	5888	5445	5512	5724	5659		5270	5216	5239	5189	5251	5233		4754	4900	4818	5003	4949	4884.8
566	6194	6384	6131	6214	6158	6216.2		6200	6252	6206	6435	6494	6317.4		6225	6443	6452	6554	6544	6443.6		6192	6354	6094	6220	6075	6187		5745	5904	5463	5530	5746	5677.6		5287	5232	5257	5202	5269	5249.4		4775	4918	4829	5024	4961	4901.4
567	6218	6411	6148	6235	6180	6238.4		6220	6279	6230	6453	6511	6338.6		6249	6465	6470	6574	6568	6465.2		6211	6368	6121	6242	6093	6207		5768	5923	5476	5552	5769	5697.6		5307	5251	5283	5229	5287	5271.4		4784	4941	4846	5037	4980	4917.6
568	6237	6441	6172	6260	6192	6260.4		6245	6296	6245	6469	6529	6356.8		6266	6490	6488	6595	6594	6486.6		6230	6394	6145	6264	6110	6228.6		5786	5944	5490	5576	5800	5719.2		5328	5262	5303	5247	5308	5289.6		4794	4957	4863	5045	5004	4932.6
569	6253	6467	6204	6282	6215	6284.2		6277	6314	6266	6490	6553	6380		6277	6510	6512	6625	6614	6507.6		6254	6407	6164	6291	6128	6248.8		5809	5965	5506	5597	5818	5739		5341	5273	5322	5265	5323	5304.8		4814	4968	4882	5057	5019	4948
570	6280	6490	6218	6307	6232	6305.4		6293	6331	6282	6511	6584	6400.2		6288	6532	6536	6651	6644	6530.2		6277	6430	6184	6304	6153	6269.6		5828	5986	5522	5610	5843	5757.8		5353	5289	5339	5283	5347	5322.2		4824	4982	4903	5077	5032	4963.6
571	6302	6516	6246	6326	6258	6329.6		6314	6351	6305	6523	6611	6420.8		6306	6551	6551	6678	6665	6550.2		6305	6448	6199	6321	6181	6290.8		5853	6006	5538	5626	5862	5777		5374	5311	5351	5300	5363	5339.8		4836	4992	4913	5095	5047	4976.6
572	6317	6541	6272	6348	6292	6354		6330	6379	6326	6546	6635	6443.2		6322	6578	6573	6703	6684	6572		6331	6469	6223	6344	6198	6313		5876	6023	5562	5640	5883	5796.8		5389	5329	5368	5326	5376	5357.6		4861	5015	4935	5106	5057	4994.8
573	6336	6560	6286	6365	6316	6372.6		6350	6408	6352	6565	6664	6467.8		6335	6596	6603	6728	6708	6594		6354	6486	6240	6365	6213	6331.6		5897	6046	5583	5659	5902	5817.4		5409	5348	5388	5342	5396	5376.6		4885	5032	4950	5118	5077	5012.4
574	6354	6581	6308	6388	6331	6392.4		6370	6436	6371	6594	6678	6489.8		6353	6625	6621	6746	6736	6616.2		6367	6501	6257	6387	6228	6348		5922	6059	5607	5679	5915	5836.4		5420	5366	5410	5361	5414	5394.2		4901	5046	4959	5136	5101	5028.6
575	6378	6594	6334	6406	6351	6412.6		6397	6464	6392	6613	6701	6513.4		6371	6647	6643	6764	6751	6635.2		6382	6526	6283	6408	6253	6370.4		5942	6080	5625	5704	5943	5858.8		5442	5385	5428	5371	5434	5412		4923	5070	4971	5161	5120	5049
576	6406	6612	6342	6431	6367	6431.6		6415	6488	6419	6638	6720	6536		6387	6667	6665	6796	6771	6657.2		6403	6542	6303	6429	6278	6391		5961	6105	5646	5726	5964	5880.4		5461	5401	5452	5386	5459	5431.8		4937	5087	4980	5169	5140	5062.6
577	6430	6637	6361	6446	6388	6452.4		6438	6510	6436	6654	6745	6556.6		6410	6691	6686	6826	6785	6679.6		6429	6564	6320	6447	6297	6411.4		5983	6121	5666	5753	5984	5901.4		5476	5413	5471	5405	5474	5447.8		4953	5103	4990	5179	5156	5076.2
578	6454	6659	6384	6469	6413	6475.8		6454	6527	6460	6684	6766	6578.2		6433	6713	6712	6842	6805	6701		6441	6589	6346	6462	6318	6431.2		5994	6134	5682	5779	5999	5917.6		5484	5429	5487	5416	5493	5461.8		4980	5125	5004	5201	5178	5097.6
579	6483	6685	6405	6490	6440	6500.6		6478	6544	6488	6710	6798	6603.6		6451	6737	6729	6871	6834	6724.4		6460	6607	6373	6482	6340	6452.4		6017	6149	5695	5801	6019	5936.2		5500	5449	5510	5434	5514	5481.4		4996	5149	5018	5217	5195	5115
580	6504	6711	6423	6508	6463	6521.8		6503	6572	6507	6732	6818	6626.4		6468	6763	6747	6894	6851	6744.6		6491	6625	6394	6498	6368	6475.2		6027	6167	5706	5820	6041	5952.2		5517	5464	5530	5457	5530	5499.6		5011	5168	5037	5234	5208	5131.6
581	6525	6742	6451	6527	6482	6545.4		6521	6592	6530	6761	6840	6648.8		6488	6779	6770	6910	6872	6763.8		6518	6637	6412	6515	6390	6494.4		6047	6185	5730	5841	6061	5972.8		5536	5485	5553	5475	5549	5519.6		5023	5177	5062	5250	5228	5148
582	6544	6771	6467	6558	6507	6569.4		6546	6624	6548	6781	6864	6672.6		6510	6797	6793	6937	6894	6786.2		6541	6662	6426	6541	6410	6516		6055	6206	5754	5862	6087	5992.8		5555	5507	5574	5496	5563	5539		5032	5188	5081	5267	5245	5162.6
583	6567	6801	6497	6579	6521	6593		6571	6655	6577	6804	6890	6699.4		6525	6806	6816	6962	6913	6804.4		6557	6687	6441	6555	6425	6533		6078	6229	5763	5890	6109	6013.8		5567	5530	5594	5520	5590	5560.2		5047	5201	5101	5289	5262	5180
584	6587	6838	6529	6597	6547	6619.6		6590	6685	6599	6824	6917	6723		6542	6825	6835	6984	6937	6824.6		6583	6712	6461	6579	6437	6554.4		6096	6244	5779	5904	6135	6031.6		5581	5541	5618	5537	5610	5577.4		5066	5215	5118	5310	5275	5196.8
585	6609	6862	6556	6627	6560	6642.8		6612	6705	6619	6841	6946	6744.6		6570	6853	6867	7000	6965	6851		6601	6734	6478	6604	6457	6574.8		6121	6263	5795	5937	6152	6053.6		5593	5562	5633	5560	5624	5594.4		5076	5230	5137	5329	5296	5213.6
586	6627	6889	6579	6654	6581	6666		6641	6732	6645	6858	6982	6771.6		6584	6880	6894	7019	6994	6874.2		6620	6754	6508	6635	6472	6597.8		6132	6281	5816	5955	6179	6072.6		5611	5580	5656	5576	5647	5614		5087	5242	5158	5343	5313	5228.6
587	6658	6921	6593	6682	6593	6689.4		6656	6751	6676	6874	7005	6792.4		6606	6902	6925	7042	7013	6897.6		6642	6775	6522	6661	6490	6618		6148	6301	5834	5965	6201	6089.8		5625	5600	5680	5597	5674	5635.2		5101	5259	5171	5363	5331	5245
588	6686	6950	6620	6710	6615	6716.2		6676	6768	6704	6910	7028	6817.2		6626	6932	6951	7066	7030	6921		6670	6801	6543	6692	6512	6643.6		6172	6325	5855	5976	6222	6110		5652	5620	5698	5617	5688	5655		5122	5274	5189	5379	5345	5261.8
589	6704	6984	6638	6739	6636	6740.2		6703	6788	6733	6930	7051	6841		6655	6959	6967	7081	7057	6943.8		6696	6825	6571	6714	6533	6667.8		6195	6348	5877	5988	6238	6129.2		5669	5633	5712	5635	5701	5670		5137	5289	5209	5400	5364	5279.8
590	6735	7004	6671	6767	6659	6767.2		6719	6815	6761	6961	7075	6866.2		6679	6990	6996	7106	7082	6970.6		6716	6839	6588	6739	6556	6687.6		6215	6363	5903	6008	6257	6149.2		5686	5658	5734	5656	5720	5690.8		5155	5305	5228	5414	5380	5296.4
591	6766	7016	6697	6791	6676	6789.2		6743	6846	6792	6989	7103	6894.6		6698	7011	7021	7128	7119	6995.4		6737	6862	6609	6756	6572	6707.2		6236	6386	5925	6033	6277	6171.4		5714	5680	5756	5669	5738	5711.4		5173	5323	5246	5432	5400	5314.8
592	6787	7039	6731	6806	6695	6811.6		6762	6869	6814	7016	7124	6917		6726	7041	7040	7159	7147	7022.6		6758	6889	6626	6777	6593	6728.6		6252	6411	5946	6060	6299	6193.6		5744	5701	5777	5682	5752	5731.2		5196	5343	5268	5455	5416	5335.6
593	6809	7059	6753	6832	6718	6834.2		6779	6899	6835	7041	7148	6940.4		6752	7067	7056	7182	7170	7045.4		6777	6911	6645	6806	6627	6753.2		6270	6433	5966	6078	6317	6212.8		5759	5719	5795	5709	5771	5750.6		5225	5366	5285	5477	5438	5358.2
594	6829	7086	6781	6864	6735	6859		6801	6924	6848	7066	7172	6962.2		6780	7089	7078	7206	7200	7070.6		6795	6938	6667	6825	6649	6774.8		6301	6456	5986	6099	6335	6235.4		5780	5742	5821	5730	5790	5772.6		5244	5387	5303	5496	5454	5376.8
595	6853	7122	6804	6894	6767	6888		6822	6953	6870	7099	7194	6987.6		6811	7111	7100	7236	7231	7097.8		6824	6961	6688	6843	6668	6796.8		6318	6486	6009	6118	6353	6256.8		5806	5761	5842	5753	5813	5795		5257	5399	5327	5515	5470	5393.6
596	6878	7152	6829	6917	6782	6911.6		6840	6984	6893	7131	7218	7013.2		6839	7131	7124	7264	7254	7122.4		6852	6989	6710	6869	6694	6822.8		6342	6507	6029	6141	6377	6279.2		5820	5785	5861	5782	5822	5814		5275	5415	5340	5539	5486	5411
597	6905	7185	6856	6941	6808	6939		6863	7004	6918	7156	7242	7036.6		6865	7155	7149	7298	7280	7149.4		6875	7012	6745	6890	6720	6848.4		6368	6529	6053	6168	6401	6303.8		5841	5811	5876	5789	5839	5831.2		5293	5431	5354	5559	5496	5426.6
598	6926	7205	6884	6958	6828	6960.2		6889	7029	6950	7186	7261	7063		6890	7185	7178	7326	7311	7178		6895	7039	6772	6912	6741	6871.8		6382	6562	6074	6185	6424	6325.4		5856	5822	5894	5808	5855	5847		5313	5447	5377	5580	5513	5446
599	6956	7225	6907	6981	6850	6983.8		6915	7056	6974	7205	7282	7086.4		6911	7210	7207	7349	7340	7203.4		6917	7072	6799	6931	6754	6894.6		6402	6573	6095	6214	6451	6347		5867	5844	5915	5824	5866	5863.2		5328	5471	5397	5601	5537	5466.8
600	6974	7245	6932	7013	6872	7007.2		6940	7087	6996	7234	7315	7114.4		6940	7242	7230	7366	7360	7227.6		6945	7096	6820	6953	6775	6917.8		6419	6593	6111	6229	6479	6366.2		5886	5860	5935	5837	5889	5881.4		5343	5488	5409	5623	5552	5483
601	6999	7267	6954	7040	6895	7031		6954	7112	7014	7268	7341	7137.8		6970	7269	7258	7393	7381	7254.2		6960	7121	6845	6975	6794	6939		6431	6613	6138	6246	6506	6386.8		5898	5876	5951	5860	5901	5897.2		5349	5501	5423	5641	5567	5496.2
602	7021	7297	6972	7058	6919	7053.4		6972	7135	7043	7290	7372	7162.4		6997	7291	7293	7418	7407	7281.2		6983	7146	6865	6999	6813	6961.2		6455	6625	6159	6269	6531	6407.8		5922	5892	5968	5879	5918	5915.8		5371	5516	5447	5655	5584	5514.6
603	7045	7324	7004	7083	6948	7080.8		7004	7153	7067	7307	7406	7187.4		7014	7313	7321	7434	7430	7302.4		7010	7176	6895	7024	6835	6988		6468	6647	6183	6285	6544	6425.4		5938	5904	5986	5899	5943	5934		5384	5542	5467	5669	5611	5534.6
604	7072	7357	7026	7109	6971	7107		7025	7182	7091	7326	7437	7212.2		7044	7337	7347	7465	7449	7328.4		7037	7197	6917	7048	6852	7010.2		6494	6664	6206	6306	6564	6446.8		5957	5922	6004	5920	5968	5954.2		5403	5558	5488	5683	5632	5552.8
605	7084	7392	7050	7134	7003	7132.6		7057	7209	7118	7362	7469	7243		7065	7360	7373	7492	7485	7355		7049	7221	6952	7075	6875	7034.4		6513	6685	6220	6327	6584	6465.8		5987	5939	6019	5942	5975	5972.4		5422	5573	5509	5705	5647	5571.2
606	7114	7407	7076	7162	7017	7155.2		7086	7236	7159	7398	7503	7276.4		7085	7383	7406	7516	7515	7381		7074	7254	6973	7096	6893	7058		6538	6704	6237	6349	6610	6487.6		6015	5964	6039	5963	5993	5994.8		5439	5582	5529	5723	5665	5587.6
607	7151	7435	7099	7182	7047	7182.8		7114	7268	7182	7421	7535	7304		7118	7403	7422	7559	7541	7408.6		7092	7279	6996	7122	6912	7080.2		6561	6727	6260	6374	6630	6510.4		6037	5987	6059	5988	6001	6014.4		5455	5605	5549	5736	5684	5605.8
608	7181	7456	7126	7204	7076	7208.6		7136	7291	7218	7443	7562	7330		7144	7429	7444	7589	7574	7436		7123	7309	7021	7142	6942	7107.4		6583	6746	6285	6390	6656	6532		6067	6005	6083	6010	6021	6037.2		5474	5627	5572	5749	5704	5625.2
609	7210	7478	7152	7229	7110	7235.8		7160	7308	7245	7476	7584	7354.6		7173	7455	7470	7617	7609	7464.8		7145	7323	7044	7164	6966	7128.4		6612	6769	6307	6413	6674	6555		6082	6025	6112	6026	6039	6056.8		5495	5653	5585	5770	5709	5642.4
610	7230	7501	7180	7258	7138	7261.4		7175	7325	7276	7501	7608	7377		7196	7485	7504	7645	7634	7492.8		7165	7351	7060	7192	6992	7152		6638	6790	6323	6423	6696	6574		6099	6045	6130	6054	6058	6077.2		5510	5672	5612	5788	5734	5663.2
611	7246	7526	7201	7279	7165	7283.4		7203	7353	7300	7527	7631	7402.8		7232	7515	7539	7665	7656	7521.4		7198	7379	7085	7219	7016	7179.4		6662	6828	6349	6440	6717	6599.2		6120	6062	6141	6077	6077	6095.4		5533	5697	5632	5803	5755	5684
612	7267	7544	7231	7314	7194	7310		7223	7385	7333	7548	7657	7429.2		7256	7543	7561	7693	7694	7549.4		7227	7410	7110	7253	7042	7208.4		6692	6849	6371	6466	6732	6622		6138	6081	6155	6093	6099	6113.2		5550	5725	5655	5817	5779	5705.2
613	7297	7574	7252	7339	7214	7335.2		7243	7415	7356	7578	7682	7454.8		7284	7564	7590	7713	7727	7575.6		7254	7431	7143	7280	7073	7236.2		6706	6868	6391	6494	6758	6643.4		6169	6110	6171	6113	6131	6138.8		5565	5743	5682	5830	5806	5725.2
614	7318	7595	7283	7366	7237	7359.8		7266	7443	7385	7604	7716	7482.8		7303	7590	7610	7736	7751	7598		7271	7462	7164	7311	7094	7260.4		6727	6886	6413	6512	6778	6663.2		6185	6133	6197	6141	6153	6161.8		5584	5757	5702	5849	5830	5744.4
615	7347	7619	7317	7396	7253	7386.4		7294	7469	7405	7626	7753	7509.4		7327	7622	7629	7753	7777	7621.6		7296	7488	7186	7336	7118	7284.8		6750	6903	6428	6532	6804	6683.4		6208	6143	6212	6161	6171	6179		5601	5781	5717	5875	5852	5765.2
616	7366	7643	7335	7419	7270	7406.6		7319	7497	7436	7662	7783	7539.4		7360	7649	7659	7777	7802	7649.4		7321	7509	7217	7352	7143	7308.4		6773	6921	6446	6556	6829	6705		6235	6164	6232	6181	6190	6200.4		5618	5808	5734	5888	5867	5783
617	7393	7664	7356	7438	7293	7428.8		7348	7527	7463	7693	7812	7568.6		7388	7674	7672	7799	7832	7673		7353	7536	7253	7384	7161	7337.4		6807	6952	6472	6585	6849	6733		6256	6181	6256	6204	6213	6222		5635	5828	5761	5904	5886	5802.8
618	7408	7691	7379	7467	7318	7452.6		7372	7548	7490	7726	7846	7596.4		7418	7707	7702	7819	7859	7701		7380	7564	7279	7413	7198	7366.8		6823	6967	6494	6609	6873	6753.2		6275	6203	6282	6230	6227	6243.4		5660	5844	5773	5929	5908	5822.8
619	7440	7725	7417	7496	7350	7485.6		7392	7568	7518	7753	7866	7619.4		7451	7741	7739	7851	7881	7732.6		7411	7588	7303	7445	7216	7392.6		6845	6991	6519	6637	6894	6777.2		6291	6224	6301	6249	6257	6264.4		5686	5861	5792	5943	5937	5843.8
620	7473	7745	7454	7527	7379	7515.6		7419	7589	7538	7785	7888	7643.8		7473	7773	7754	7880	7910	7758		7437	7623	7335	7471	7240	7421.2		6876	7019	6538	6661	6924	6803.6		6315	6247	6329	6268	6279	6287.6		5707	5876	5809	5956	5951	5859.8
621	7493	7760	7478	7559	7409	7539.8		7444	7613	7563	7818	7910	7669.6		7505	7795	7787	7916	7945	7789.6		7457	7650	7354	7505	7270	7447.2		6898	7046	6564	6686	6950	6828.8		6337	6279	6346	6293	6301	6311.2		5732	5903	5833	5975	5971	5882.8
622	7516	7792	7499	7590	7435	7566.4		7480	7639	7592	7842	7926	7695.8		7536	7817	7814	7942	7978	7817.4		7480	7684	7377	7526	7301	7473.6		6920	7067	6587	6702	6965	6848.2		6371	6300	6362	6331	6329	6338.6		5756	5917	5845	5994	5987	5899.8
623	7545	7814	7524	7621	7466	7594		7503	7667	7619	7867	7944	7720		7580	7841	7847	7965	8005	7847.6		7509	7719	7412	7550	7330	7504		6951	7088	6607	6725	6997	6873.6		6391	6331	6376	6350	6343	6358.2		5777	5934	5866	6022	6010	5921.8
624	7575	7841	7548	7643	7490	7619.4		7527	7700	7648	7894	7969	7747.6		7608	7863	7887	7989	8040	7877.4		7534	7750	7441	7578	7361	7532.8		6969	7108	6626	6744	7023	6894		6422	6348	6406	6371	6365	6382.4		5795	5955	5891	6044	6026	5942.2
625	7606	7862	7579	7672	7527	7649.2		7558	7723	7672	7921	7997	7774.2		7634	7893	7925	8011	8074	7907.4		7561	7784	7463	7612	7382	7560.4		7000	7134	6645	6767	7045	6918.2		6441	6364	6430	6395	6394	6404.8		5817	5974	5910	6071	6045	5963.4
626	7644	7886	7600	7700	7559	7677.8		7581	7764	7705	7955	8017	7804.4		7668	7919	7953	8040	8119	7939.8		7589	7813	7490	7641	7411	7588.8		7025	7156	6664	6792	7063	6940		6460	6385	6453	6419	6429	6429.2		5831	5996	5928	6095	6067	5983.4
627	7678	7908	7635	7726	7574	7704.2		7604	7796	7729	7988	8063	7836		7695	7941	7977	8072	8146	7966.2		7612	7839	7512	7670	7439	7614.4		7058	7169	6688	6813	7092	6964		6486	6410	6478	6438	6453	6453		5852	6018	5950	6109	6090	6003.8
628	7710	7932	7663	7745	7597	7729.4		7625	7828	7759	8012	8095	7863.8		7726	7975	8007	8098	8179	7997		7643	7864	7527	7696	7466	7639.2		7079	7194	6714	6835	7120	6988.4		6502	6438	6496	6466	6474	6475.2		5875	6032	5968	6134	6113	6024.4
629	7737	7964	7681	7780	7625	7757.4		7655	7852	7779	8027	8127	7888		7753	8002	8040	8128	8214	8027.4		7672	7899	7552	7722	7490	7667		7108	7217	6731	6869	7141	7013.2		6517	6460	6514	6487	6499	6495.4		5889	6053	5990	6148	6129	6041.8
630	7765	7987	7698	7817	7643	7782		7681	7888	7804	8060	8160	7918.6		7775	8038	8077	8166	8248	8060.8		7700	7926	7587	7749	7517	7695.8		7134	7253	6762	6894	7166	7041.8		6541	6487	6538	6509	6525	6520		5907	6074	6008	6170	6148	6061.4
631	7795	8024	7724	7838	7673	7810.8		7710	7917	7831	8093	8187	7947.6		7808	8064	8104	8205	8272	8090.6		7728	7965	7616	7779	7538	7725.2		7149	7278	6786	6922	7195	7066		6558	6509	6569	6528	6557	6544.2		5936	6095	6029	6198	6163	6084.2
632	7838	8058	7752	7875	7696	7843.8		7741	7944	7862	8128	8219	7978.8		7838	8099	8131	8242	8307	8123.4		7763	8001	7637	7798	7562	7752.2		7167	7297	6819	6945	7217	7089		6581	6531	6586	6548	6581	6565.4		5952	6128	6055	6222	6184	6108.2
633	7864	8079	7783	7915	7732	7874.6		7770	7974	7893	8162	8238	8007.4		7869	8132	8172	8275	8341	8157.8		7797	8030	7662	7817	7586	7778.4		7189	7320	6837	6961	7233	7108		6605	6550	6605	6574	6604	6587.6		5975	6145	6064	6249	6209	6128.4
634	7895	8125	7804	7959	7769	7910.4		7797	7998	7932	8193	8258	8035.6		7900	8156	8197	8306	8363	8184.4		7828	8065	7696	7844	7611	7808.8		7205	7343	6860	6986	7257	7130.2		6626	6570	6628	6601	6627	6610.4		6002	6160	6078	6269	6230	6147.8
635	7928	8151	7834	7984	7800	7939.4		7830	8025	7968	8241	8289	8070.6		7936	8182	8222	8329	8393	8212.4		7853	8093	7724	7867	7646	7836.6		7237	7367	6886	7003	7279	7154.4		6654	6597	6654	6626	6650	6636.2		6027	6176	6101	6289	6250	6168.6
636	7962	8178	7865	8010	7824	7967.8		7864	8059	8006	8265	8309	8100.6		7973	8215	8245	8357	8432	8244.4		7888	8128	7756	7893	7683	7869.6		7254	7397	6907	7031	7310	7179.8		6669	6618	6678	6651	6669	6657		6048	6193	6115	6300	6269	6185
637	7992	8214	7887	8033	7856	7996.4		7892	8091	8039	8295	8337	8130.8		8003	8246	8288	8392	8469	8279.6		7916	8170	7794	7905	7710	7899		7277	7425	6930	7061	7340	7206.6		6694	6642	6712	6673	6692	6682.6		6068	6221	6141	6330	6291	6210.2
638	8025	8246	7920	8065	7890	8029.2		7919	8123	8056	8320	8368	8157.2		8030	8272	8314	8428	8496	8308		7939	8198	7821	7934	7722	7922.8		7297	7448	6959	7090	7362	7231.2		6721	6670	6730	6709	6706	6707.2		6101	6240	6159	6349	6310	6231.8
639	8062	8282	7943	8093	7915	8059		7952	8161	8089	8352	8396	8190		8061	8305	8336	8445	8539	8337.2		7969	8234	7853	7975	7759	7958		7318	7466	6988	7108	7386	7253.2		6748	6693	6755	6733	6726	6731		6122	6262	6179	6367	6328	6251.6
640	8097	8302	7970	8125	7942	8087.2		7980	8189	8119	8388	8431	8221.4		8089	8344	8366	8472	8572	8368.6		8002	8271	7873	8003	7789	7987.6		7334	7497	7020	7127	7414	7278.4		6771	6727	6782	6758	6763	6760.2		6144	6286	6214	6388	6358	6278
641	8126	8332	8000	8153	7972	8116.6		8007	8221	8149	8422	8460	8251.8		8118	8363	8406	8506	8606	8399.8		8038	8298	7901	8042	7823	8020.4		7344	7519	7047	7155	7442	7301.4		6805	6749	6798	6781	6783	6783.2		6164	6307	6231	6409	6386	6299.4
642	8151	8360	8031	8182	8002	8145.2		8038	8251	8181	8448	8487	8281		8161	8397	8438	8537	8644	8435.4		8079	8332	7928	8066	7848	8050.6		7378	7547	7074	7184	7472	7331		6829	6762	6830	6806	6812	6807.8		6183	6332	6255	6433	6411	6322.8
643	8183	8393	8066	8217	8026	8177		8069	8279	8212	8478	8519	8311.4		8192	8427	8468	8571	8681	8467.8		8114	8365	7961	8098	7873	8082.2		7411	7573	7101	7205	7501	7358.2		6857	6793	6856	6840	6824	6834		6196	6351	6281	6454	6427	6341.8
644	8216	8434	8088	8243	8074	8211		8106	8310	8238	8514	8551	8343.8		8234	8461	8510	8605	8717	8505.4		8154	8387	7998	8129	7893	8112.2		7450	7594	7121	7229	7535	7385.8		6880	6820	6888	6860	6847	6859		6217	6373	6304	6470	6452	6363.2
645	8255	8471	8115	8280	8104	8245		8132	8343	8260	8546	8576	8371.4		8278	8493	8534	8649	8745	8539.8		8169	8414	8027	8161	7918	8137.8		7475	7621	7146	7251	7565	7411.6		6898	6848	6907	6875	6867	6879		6242	6396	6323	6491	6467	6383.8
646	8290	8505	8149	8306	8143	8278.6		8159	8366	8293	8579	8600	8399.4		8322	8522	8571	8675	8774	8572.8		8203	8448	8056	8206	7936	8169.8		7497	7638	7167	7271	7595	7433.6		6938	6866	6941	6892	6890	6905.4		6259	6423	6341	6509	6496	6405.6
647	8325	8527	8182	8332	8177	8308.6		8198	8394	8325	8620	8625	8432.4		8357	8547	8618	8719	8797	8607.6		8233	8476	8081	8236	7957	8196.6		7529	7655	7189	7307	7632	7462.4		6968	6885	6962	6915	6913	6928.6		6274	6445	6364	6531	6518	6426.4
648	8350	8559	8196	8358	8208	8334.2		8219	8428	8357	8649	8657	8462		8392	8582	8651	8755	8835	8643		8265	8499	8116	8264	7983	8225.4		7552	7679	7210	7333	7663	7487.4		6983	6912	6974	6934	6930	6946.6		6287	6475	6379	6551	6545	6447.4
649	8385	8597	8227	8395	8241	8369		8255	8469	8383	8679	8688	8494.8		8431	8604	8690	8806	8871	8680.4		8288	8531	8143	8286	8011	8251.8		7564	7707	7225	7354	7689	7507.8		7007	6937	6985	6954	6954	6967.4		6313	6497	6401	6580	6570	6472.2
650	8415	8633	8253	8426	8273	8400		8289	8497	8421	8701	8711	8523.8		8466	8642	8718	8858	8900	8716.8		8322	8555	8170	8311	8039	8279.4		7591	7727	7251	7377	7715	7532.2		7026	6955	7016	6974	6980	6990.2		6333	6520	6430	6605	6594	6496.4
651	8448	8669	8286	8455	8315	8434.6		8322	8539	8455	8728	8743	8557.4		8503	8676	8750	8899	8928	8751.2		8349	8583	8188	8337	8055	8302.4		7618	7757	7277	7406	7747	7561		7051	6965	7038	6998	7002	7010.8		6351	6542	6455	6634	6611	6518.6
652	8476	8699	8317	8489	8350	8466.2		8351	8578	8493	8757	8789	8593.6		8528	8704	8778	8934	8958	8780.4		8386	8614	8220	8371	8093	8336.8		7645	7787	7306	7435	7767	7588		7079	6989	7062	7028	7029	7037.4		6367	6567	6477	6662	6638	6542.2
653	8502	8728	8350	8524	8384	8497.6		8378	8615	8534	8789	8819	8627		8565	8751	8809	8971	8994	8818		8404	8645	8253	8404	8122	8365.6		7664	7809	7337	7469	7794	7614.6		7101	7007	7085	7049	7051	7058.6		6394	6590	6496	6692	6662	6566.8
654	8529	8755	8382	8548	8418	8526.4		8407	8650	8560	8818	8857	8658.4		8604	8778	8837	9002	9025	8849.2		8443	8679	8284	8432	8160	8399.6		7698	7851	7361	7493	7809	7642.4		7141	7028	7110	7075	7074	7085.6		6411	6604	6515	6712	6697	6587.8
655	8548	8788	8412	8572	8448	8553.6		8445	8689	8595	8852	8882	8692.6		8644	8805	8873	9039	9060	8884.2		8463	8701	8317	8471	8183	8427		7720	7882	7383	7514	7834	7666.6		7170	7051	7131	7096	7097	7109		6429	6630	6542	6734	6724	6611.8
656	8565	8817	8447	8611	8473	8582.6		8491	8722	8637	8886	8905	8728.2		8683	8843	8900	9072	9091	8917.8		8485	8734	8349	8501	8216	8457		7744	7916	7404	7534	7859	7691.4		7207	7069	7156	7127	7116	7135		6450	6651	6570	6755	6751	6635.4
657	8599	8853	8480	8639	8517	8617.6		8520	8754	8661	8917	8949	8760.2		8698	8883	8941	9104	9129	8951		8520	8768	8376	8524	8255	8488.6		7777	7944	7427	7564	7887	7719.8		7229	7090	7182	7148	7135	7156.8		6471	6670	6590	6779	6782	6658.4
658	8628	8895	8518	8668	8539	8649.6		8553	8784	8690	8949	8985	8792.2		8743	8917	8986	9151	9160	8991.4		8550	8791	8412	8549	8288	8518		7801	7975	7460	7587	7920	7748.6		7249	7113	7203	7162	7162	7177.8		6493	6695	6616	6800	6794	6679.6
659	8660	8926	8552	8698	8579	8683		8595	8810	8726	8991	9026	8829.6		8783	8945	9033	9189	9184	9026.8		8587	8818	8435	8585	8313	8547.6		7828	8010	7486	7614	7935	7774.6		7276	7130	7230	7188	7182	7201.2		6521	6721	6635	6815	6816	6701.6
660	8692	8946	8584	8732	8628	8716.4		8632	8848	8759	9028	9059	8865.2		8829	8973	9071	9231	9212	9063.2		8623	8850	8471	8614	8347	8581		7857	8032	7513	7641	7968	7802.2		7288	7161	7260	7207	7210	7225.2		6546	6748	6653	6838	6844	6725.8
661	8718	8982	8616	8762	8660	8747.6		8666	8882	8798	9060	9096	8900.4		8869	9009	9096	9264	9243	9096.2		8654	8876	8508	8643	8377	8611.6		7884	8069	7531	7669	8003	7831.2		7317	7193	7290	7237	7224	7252.2		6570	6771	6667	6859	6866	6746.6
662	8754	9014	8648	8793	8702	8782.2		8707	8916	8824	9099	9143	8937.8		8896	9040	9124	9302	9283	9129		8685	8899	8541	8676	8400	8640.2		7905	8099	7558	7693	8028	7856.6		7334	7220	7320	7264	7247	7277		6579	6798	6693	6876	6897	6768.6
663	8784	9044	8676	8823	8739	8813.2		8748	8957	8853	9139	9190	8977.4		8930	9067	9167	9344	9314	9164.4		8723	8933	8566	8697	8440	8671.8		7928	8129	7580	7720	8058	7883		7358	7239	7347	7297	7266	7301.4		6604	6821	6715	6896	6915	6790.2
664	8810	9083	8713	8857	8772	8847		8795	8989	8893	9167	9225	9013.8		8959	9105	9197	9387	9344	9198.4		8768	8966	8592	8727	8477	8706		7947	8152	7600	7746	8090	7907		7378	7261	7382	7322	7295	7327.6		6619	6849	6732	6917	6944	6812.2
665	8840	9117	8752	8890	8802	8880.2		8826	9020	8931	9202	9255	9046.8		9006	9145	9225	9430	9368	9234.8		8799	9004	8624	8757	8509	8738.6		7974	8180	7616	7766	8108	7928.8		7394	7289	7408	7335	7322	7349.6		6637	6875	6753	6934	6961	6832
666	8870	9159	8783	8924	8832	8913.6		8862	9047	8964	9229	9284	9077.2		9053	9182	9257	9458	9395	9269		8828	9030	8659	8782	8540	8767.8		8007	8213	7636	7801	8149	7961.2		7413	7318	7425	7366	7355	7375.4		6663	6897	6781	6944	6981	6853.2
667	8910	9187	8809	8956	8873	8947		8905	9082	8996	9263	9324	9114		9080	9208	9274	9496	9445	9300.6		8859	9070	8684	8817	8572	8800.4		8031	8232	7665	7833	8181	7988.4		7438	7337	7461	7393	7383	7402.4		6686	6923	6804	6976	7002	6878.2
668	8939	9222	8840	8990	8899	8978		8937	9113	9024	9310	9353	9147.4		9111	9244	9316	9538	9494	9340.6		8901	9121	8719	8857	8607	8841		8064	8267	7691	7856	8206	8016.8		7457	7366	7483	7419	7409	7426.8		6716	6936	6821	6995	7020	6897.6
669	8979	9259	8883	9012	8939	9014.4		8982	9151	9061	9346	9389	9185.8		9144	9276	9348	9581	9521	9374		8947	9158	8742	8896	8638	8876.2		8092	8303	7712	7885	8238	8046		7486	7392	7509	7448	7454	7457.8		6740	6950	6843	7024	7040	6919.4
670	9016	9292	8926	9047	8965	9049.2		9025	9189	9093	9381	9427	9223		9176	9318	9379	9616	9553	9408.4		8975	9198	8776	8922	8673	8908.8		8123	8337	7736	7913	8272	8076.2		7511	7420	7522	7467	7488	7481.6		6761	6973	6866	7045	7062	6941.4
671	9040	9322	8950	9079	8996	9077.4		9052	9217	9115	9416	9465	9253		9208	9347	9416	9644	9588	9440.6		9002	9226	8809	8952	8693	8936.4		8144	8371	7765	7936	8302	8103.6		7555	7436	7541	7489	7513	7506.8		6784	6987	6895	7068	7083	6963.4
672	9077	9362	8984	9119	9040	9116.4		9084	9251	9154	9447	9504	9288		9248	9384	9453	9685	9620	9478		9032	9258	8846	8995	8729	8972		8176	8400	7794	7968	8334	8134.4		7579	7459	7578	7514	7543	7534.6		6800	7016	6917	7089	7101	6984.6
673	9096	9395	9017	9151	9070	9145.8		9122	9284	9181	9473	9537	9319.4		9290	9415	9482	9719	9660	9513.2		9070	9304	8882	9035	8755	9009.2		8213	8442	7817	7999	8355	8165.2		7602	7487	7610	7550	7575	7564.8		6822	7046	6941	7119	7121	7009.8
674	9130	9431	9045	9178	9102	9177.2		9158	9310	9210	9504	9564	9349.2		9323	9453	9518	9749	9694	9547.4		9104	9339	8914	9063	8772	9038.4		8238	8480	7851	8022	8375	8193.2		7640	7524	7634	7578	7593	7593.8		6842	7069	6966	7142	7142	7032.2
675	9167	9466	9079	9215	9137	9212.8		9201	9350	9247	9536	9595	9385.8		9359	9489	9550	9778	9732	9581.6		9145	9370	8944	9093	8806	9071.6		8274	8510	7882	8053	8410	8225.8		7667	7549	7658	7596	7613	7616.6		6867	7086	6986	7156	7165	7052
676	9200	9497	9119	9245	9166	9245.4		9232	9372	9281	9570	9629	9416.8		9397	9535	9578	9825	9769	9620.8		9179	9414	8982	9128	8842	9109		8307	8544	7903	8086	8439	8255.8		7694	7579	7677	7619	7638	7641.4		6890	7111	7004	7179	7191	7075
677	9223	9523	9144	9280	9211	9276.2		9266	9412	9302	9605	9661	9449.2		9443	9573	9620	9854	9813	9660.6		9222	9442	9027	9161	8872	9144.8		8323	8564	7933	8105	8467	8278.4		7719	7612	7705	7648	7670	7670.8		6914	7135	7029	7200	7222	7100
678	9255	9560	9180	9331	9251	9315.4		9297	9453	9342	9635	9707	9486.8		9483	9625	9665	9892	9842	9701.4		9251	9473	9044	9188	8906	9172.4		8361	8599	7960	8140	8494	8310.8		7746	7624	7730	7688	7699	7697.4		6938	7159	7055	7230	7238	7124
679	9296	9591	9218	9361	9283	9349.8		9349	9480	9377	9662	9739	9521.4		9519	9658	9694	9937	9875	9736.6		9295	9513	9080	9222	8931	9208.2		8391	8632	7987	8166	8511	8337.4		7773	7655	7752	7716	7737	7726.6		6964	7193	7082	7263	7266	7153.6
680	9341	9630	9259	9392	9314	9387.2		9381	9517	9422	9697	9779	9559.2		9564	9692	9731	9967	9910	9772.8		9324	9548	9119	9256	8961	9241.6		8421	8669	8020	8194	8541	8369		7795	7677	7773	7738	7759	7748.4		6982	7222	7108	7281	7291	7176.8
681	9381	9663	9295	9426	9335	9420		9421	9565	9463	9729	9814	9598.4		9607	9733	9763	10000	9957	9812		9366	9581	9150	9300	8991	9277.6		8447	8710	8048	8219	8575	8399.8		7832	7703	7800	7766	7786	7777.4		7002	7240	7133	7303	7319	7199.4
682	9415	9698	9333	9462	9365	9454.6		9464	9596	9502	9765	9867	9638.8		9638	9763	9784	10037	9982	9840.8		9386	9612	9190	9333	9015	9307.2		8480	8752	8078	8247	8602	8431.8		7859	7734	7828	7798	7798	7803.4		7036	7261	7157	7330	7344	7225.6
683	9440	9725	9361	9499	9403	9485.6		9499	9631	9529	9804	9905	9673.6		9683	9808	9821	10078	10021	9882.2		9414	9653	9229	9364	9059	9343.8		8514	8790	8110	8272	8628	8462.8		7883	7776	7860	7826	7823	7833.6		7064	7282	7191	7349	7364	7250
684	9479	9769	9391	9532	9436	9521.4		9538	9666	9565	9833	9933	9707		9710	9827	9856	10120	10059	9914.4		9458	9690	9254	9407	9105	9382.8		8538	8829	8143	8298	8664	8494.4		7906	7810	7886	7841	7854	7859.4		7088	7302	7214	7371	7386	7272.2
685	9510	9813	9415	9564	9474	9555.2		9573	9706	9596	9878	9973	9745.2		9748	9869	9886	10156	10091	9950		9491	9735	9302	9452	9138	9423.6		8572	8862	8174	8322	8699	8525.8		7934	7828	7917	7871	7875	7885		7113	7318	7234	7405	7416	7297.2
686	9546	9842	9446	9597	9505	9587.2		9607	9738	9630	9915	10012	9780.4		9770	9900	9915	10190	10133	9981.6		9522	9769	9339	9484	9165	9455.8		8605	8900	8200	8355	8747	8561.4		7962	7858	7942	7902	7905	7913.8		7145	7345	7259	7439	7446	7326.8
687	9582	9881	9481	9629	9539	9622.4		9651	9771	9665	9949	10052	9817.6		9805	9943	9964	10225	10167	10020.8		9560	9807	9378	9516	9205	9493.2		8653	8926	8229	8386	8782	8595.2		7986	7888	7979	7937	7928	7943.6		7170	7365	7279	7452	7469	7347
688	9617	9914	9522	9677	9568	9659.6		9686	9812	9720	9987	10104	9861.8		9840	9971	10004	10263	10197	10055		9603	9837	9409	9552	9243	9528.8		8688	8963	8267	8411	8820	8629.8		8016	7918	8000	7966	7945	7969		7194	7383	7301	7480	7493	7370.2
689	9645	9941	9548	9708	9612	9690.8		9719	9850	9758	10022	10134	9896.6		9868	10010	10040	10295	10231	10088.8		9637	9864	9440	9587	9282	9562		8721	8986	8291	8435	8858	8658.2		8036	7954	8020	7997	7967	7994.8		7217	7403	7321	7499	7519	7391.8
690	9682	9976	9584	9745	9660	9729.4		9767	9874	9788	10050	10168	9929.4		9901	10054	10071	10327	10260	10122.6		9668	9904	9477	9614	9325	9597.6		8749	9027	8312	8462	8898	8689.6		8064	7986	8042	8016	7992	8020		7242	7425	7341	7521	7550	7415.8
691	9717	10020	9625	9794	9689	9769		9804	9916	9814	10089	10215	9967.6		9932	10088	10121	10354	10282	10155.4		9701	9944	9511	9645	9355	9631.2		8769	9051	8338	8493	8930	8716.2		8088	8014	8068	8041	8037	8049.6		7265	7444	7371	7546	7572	7439.6
692	9747	10045	9658	9838	9727	9803		9847	9956	9852	10121	10253	10005.8		9971	10125	10159	10393	10315	10192.6		9734	9977	9549	9684	9382	9665.2		8794	9093	8363	8528	8965	8748.6		8118	8038	8100	8068	8056	8076		7287	7468	7388	7572	7595	7462
693	9779	10089	9691	9866	9764	9837.8		9893	9991	9890	10159	10292	10045		10011	10157	10193	10436	10345	10228.4		9761	10010	9581	9728	9417	9699.4		8817	9127	8389	8556	8995	8776.8		8153	8067	8116	8097	8088	8104.2		7301	7498	7425	7587	7612	7484.6
694	9813	10122	9733	9897	9793	9871.6		9927	10028	9923	10207	10324	10081.8		10057	10186	10228	10464	10381	10263.2		9805	10050	9603	9769	9447	9734.8		8834	9167	8414	8577	9027	8803.8		8184	8092	8137	8117	8123	8130.6		7318	7522	7446	7621	7644	7510.2
695	9859	10147	9759	9945	9835	9909		9967	10070	9963	10250	10363	10122.6		10086	10209	10257	10499	10409	10292		9842	10090	9650	9808	9484	9774.8		8865	9188	8445	8605	9057	8832		8222	8120	8167	8145	8144	8159.6		7348	7546	7467	7644	7672	7535.4
696	9901	10174	9789	9982	9862	9941.6		9998	10111	9997	10285	10400	10158.2		10107	10249	10294	10537	10450	10327.4		9868	10125	9688	9842	9523	9809.2		8907	9217	8472	8630	9092	8863.6		8248	8151	8186	8175	8166	8185.2		7379	7577	7501	7669	7701	7565.4
697	9938	10207	9823	10008	9904	9976		10028	10144	10030	10333	10441	10195.2		10150	10279	10328	10565	10488	10362		9907	10164	9725	9879	9569	9848.8		8929	9251	8509	8649	9125	8892.6		8284	8167	8217	8190	8193	8210.2		7406	7598	7526	7696	7727	7590.6
698	9985	10251	9856	10041	9940	10014.6		10061	10178	10071	10366	10489	10233		10179	10309	10363	10598	10519	10393.6		9941	10191	9760	9914	9606	9882.4		8957	9291	8537	8678	9170	8926.6		8307	8197	8242	8219	8221	8237.2		7435	7619	7552	7720	7751	7615.4
699	10027	10288	9897	10080	9976	10053.6		10099	10215	10098	10401	10526	10267.8		10223	10340	10404	10630	10556	10430.6		9977	10224	9785	9950	9634	9914		8986	9326	8568	8709	9194	8956.6		8341	8225	8272	8243	8262	8268.6		7449	7645	7580	7745	7799	7643.6
700	10071	10327	9929	10103	10007	10087.4		10136	10249	10143	10434	10579	10308.2		10257	10374	10456	10666	10592	10469		10012	10255	9812	9984	9663	9945.2		9020	9367	8602	8744	9228	8992.2		8367	8259	8304	8261	8282	8294.6		7477	7668	7594	7773	7828	7668
701	10108	10371	9962	10134	10044	10123.8		10181	10279	10177	10468	10609	10342.8		10304	10428	10495	10699	10632	10511.6		10050	10284	9850	10026	9694	9980.8		9057	9386	8627	8778	9267	9023		8394	8282	8331	8288	8300	8319		7509	7694	7611	7797	7865	7695.2
702	10149	10408	10008	10176	10078	10163.8		10219	10311	10217	10503	10658	10381.6		10342	10470	10539	10743	10679	10554.6		10089	10318	9884	10067	9727	10017		9086	9420	8658	8811	9301	9055.2		8424	8309	8359	8311	8331	8346.8		7536	7717	7630	7823	7899	7721
703	10188	10461	10034	10219	10107	10201.8		10270	10338	10253	10533	10694	10417.6		10389	10509	10585	10779	10703	10593		10122	10361	9918	10097	9766	10052.8		9125	9451	8688	8843	9320	9085.4		8452	8336	8376	8338	8364	8373.2		7561	7743	7650	7850	7930	7746.8
704	10223	10491	10070	10255	10143	10236.4		10321	10379	10294	10570	10731	10459		10435	10555	10639	10809	10740	10635.6		10157	10400	9951	10148	9794	10090		9163	9485	8719	8871	9363	9120.2		8482	8361	8398	8369	8384	8398.8		7587	7767	7679	7873	7953	7771.8
705	10258	10535	10103	10302	10185	10276.6		10359	10407	10317	10621	10762	10493.2		10468	10593	10698	10842	10776	10675.4		10192	10432	9992	10185	9822	10124.6		9195	9520	8755	8901	9393	9152.8		8510	8390	8433	8398	8407	8427.6		7619	7790	7722	7899	7979	7801.8
706	10295	10578	10132	10332	10222	10311.8		10392	10442	10366	10656	10810	10533.2		10507	10630	10724	10881	10818	10712		10235	10454	10024	10223	9855	10158.2		9238	9546	8777	8938	9437	9187.2		8536	8415	8459	8423	8445	8455.6		7640	7822	7745	7919	7991	7823.4
707	10336	10618	10169	10365	10261	10349.8		10428	10483	10402	10695	10846	10570.8		10552	10663	10761	10917	10856	10749.8		10269	10494	10050	10258	9903	10194.8		9275	9585	8803	8962	9467	9218.4		8557	8449	8490	8446	8466	8481.6		7671	7847	7771	7947	8010	7849.2
708	10380	10651	10202	10398	10290	10384.2		10473	10516	10430	10733	10875	10605.4		10578	10697	10801	10960	10891	10785.4		10300	10533	10079	10307	9933	10230.4		9308	9610	8843	9000	9496	9251.4		8585	8475	8517	8477	8493	8509.4		7697	7876	7795	7979	8045	7878.4
709	10414	10682	10234	10434	10320	10416.8		10509	10557	10467	10779	10917	10645.8		10610	10733	10856	10990	10931	10824		10338	10570	10111	10341	9971	10266.2		9341	9639	8870	9025	9532	9281.4		8614	8511	8545	8496	8525	8538.2		7728	7904	7819	8001	8075	7905.4
710	10461	10729	10272	10477	10352	10458.2		10544	10602	10486	10804	10960	10679.2		10643	10777	10894	11025	10979	10863.6		10371	10604	10146	10385	10001	10301.4		9374	9673	8903	9066	9560	9315.2		8639	8535	8566	8517	8550	8561.4		7761	7927	7836	8026	8099	7929.8
711	10494	10764	10305	10512	10392	10493.4		10577	10647	10518	10843	10991	10715.2		10674	10824	10933	11059	11015	10901		10404	10633	10180	10423	10027	10333.4		9399	9705	8930	9096	9585	9343		8663	8559	8601	8543	8569	8587		7788	7951	7861	8045	8125	7954
712	10542	10806	10350	10552	10432	10536.4		10604	10676	10558	10886	11041	10753		10711	10858	10972	11105	11050	10939.2		10439	10672	10218	10449	10061	10367.8		9436	9739	8963	9122	9621	9376.2		8684	8583	8632	8563	8606	8613.6		7814	7983	7882	8077	8147	7980.6
713	10583	10845	10396	10584	10477	10577		10622	10725	10592	10916	11081	10787.2		10748	10895	10999	11150	11083	10975		10478	10708	10262	10490	10093	10406.2		9470	9772	8983	9159	9664	9409.6		8719	8615	8657	8598	8637	8645.2		7853	7999	7894	8105	8175	8005.2
714	10608	10882	10441	10621	10507	10611.8		10659	10757	10620	10958	11125	10823.8		10775	10924	11034	11188	11118	11007.8		10509	10740	10311	10521	10138	10443.8		9491	9809	9012	9192	9686	9438		8749	8646	8680	8622	8661	8671.6		7873	8029	7929	8136	8201	8033.6
715	10650	10932	10485	10665	10539	10654.2		10701	10793	10661	10999	11156	10862		10806	10972	11070	11229	11154	11046.2		10544	10783	10333	10552	10173	10477		9526	9850	9044	9226	9713	9471.8		8773	8673	8712	8666	8690	8702.8		7897	8058	7950	8162	8224	8058.2
716	10686	10971	10505	10695	10569	10685.2		10735	10824	10694	11045	11199	10899.4		10844	11013	11109	11259	11184	11081.8		10590	10817	10378	10587	10213	10517		9552	9889	9078	9259	9735	9502.6		8799	8705	8742	8696	8717	8731.8		7929	8083	7973	8184	8259	8085.6
717	10732	11014	10553	10731	10602	10726.4		10773	10853	10730	11090	11245	10938.2		10885	11053	11150	11316	11225	11125.8		10629	10853	10420	10628	10250	10556		9581	9930	9116	9282	9765	9534.8		8834	8741	8777	8717	8746	8763		7949	8116	7992	8211	8286	8110.8
718	10768	11059	10592	10757	10632	10761.6		10809	10881	10763	11139	11287	10975.8		10918	11097	11189	11353	11266	11164.6		10666	10891	10469	10663	10287	10595.2		9602	9965	9147	9324	9802	9568		8861	8774	8808	8746	8772	8792.2		7974	8144	8011	8239	8314	8136.4
719	10807	11101	10636	10801	10663	10801.6		10852	10920	10793	11184	11320	11013.8		10956	11138	11233	11387	11319	11206.6		10706	10927	10505	10693	10329	10632		9637	10007	9179	9353	9841	9603.4		8881	8807	8839	8775	8809	8822.2		7995	8169	8037	8268	8354	8164.6
720	10849	11146	10674	10838	10694	10840.2		10903	10958	10840	11217	11359	11055.4		10987	11177	11272	11419	11362	11243.4		10748	10957	10539	10722	10373	10667.8		9671	10045	9212	9394	9866	9637.6		8911	8832	8869	8806	8846	8852.8		8017	8187	8065	8295	8379	8188.6
721	10894	11187	10711	10873	10731	10879.2		10942	10991	10879	11261	11395	11093.6		11015	11222	11312	11470	11391	11282		10771	10990	10581	10759	10408	10701.8		9712	10075	9244	9423	9893	9669.4		8947	8860	8892	8835	8881	8883		8042	8209	8090	8324	8407	8214.4
722	10925	11234	10758	10919	10768	10920.8		10979	11036	10910	11306	11436	11133.4		11035	11254	11347	11511	11425	11314.4		10807	11023	10613	10793	10452	10737.6		9748	10117	9285	9457	9927	9706.8		8987	8890	8921	8858	8915	8914.2		8079	8221	8114	8356	8432	8240.4
723	10959	11278	10796	10960	10820	10962.6		11017	11068	10954	11346	11473	11171.6		11077	11284	11396	11534	11460	11350.2		10857	11055	10650	10824	10487	10774.6		9790	10155	9312	9495	9963	9743		9014	8916	8946	8890	8939	8941		8121	8248	8141	8384	8456	8270
724	11004	11330	10832	10998	10859	11004.6		11048	11099	10987	11389	11505	11205.6		11107	11323	11435	11575	11500	11388		10897	11090	10692	10863	10516	10811.6		9821	10192	9341	9533	9997	9776.8		9038	8948	8976	8914	8962	8967.6		8151	8278	8167	8409	8472	8295.4
725	11047	11365	10863	11047	10901	11044.6		11097	11130	11022	11438	11536	11244.6		11140	11359	11476	11611	11547	11426.6		10949	11130	10723	10897	10547	10849.2		9859	10229	9363	9572	10020	9808.6		9078	8978	9012	8950	9003	9004.2		8185	8308	8199	8436	8508	8327.2
726	11081	11413	10898	11071	10934	11079.4		11126	11165	11063	11471	11567	11278.4		11171	11386	11515	11641	11589	11460.4		10995	11168	10757	10943	10583	10889.2		9896	10256	9403	9600	10062	9843.4		9111	9013	9047	8979	9024	9034.8		8214	8338	8224	8468	8533	8355.4
727	11115	11463	10954	11113	10971	11123.2		11168	11203	11119	11509	11599	11319.6		11204	11428	11559	11677	11638	11501.2		11039	11215	10791	10977	10622	10928.8		9939	10280	9432	9626	10099	9875.2		9139	9041	9077	9011	9056	9064.8		8239	8362	8247	8492	8559	8379.8
728	11152	11504	10993	11150	11013	11162.4		11203	11237	11162	11548	11628	11355.6		11231	11482	11594	11713	11676	11539.2		11071	11264	10822	11011	10654	10964.4		9974	10324	9469	9654	10142	9912.6		9164	9071	9106	9041	9091	9094.6		8263	8387	8283	8523	8590	8409.2
729	11184	11544	11026	11195	11045	11198.8		11232	11281	11210	11591	11660	11394.8		11275	11525	11626	11758	11717	11580.2		11100	11299	10853	11043	10697	10998.4		10012	10361	9499	9681	10165	9943.6		9201	9098	9134	9072	9130	9127		8291	8425	8309	8553	8620	8439.6
730	11228	11592	11058	11231	11080	11237.8		11271	11324	11241	11631	11693	11432		11317	11560	11657	11789	11750	11614.6		11148	11345	10902	11086	10733	11042.8		10053	10394	9534	9714	10193	9977.6		9234	9127	9168	9118	9161	9161.6		8313	8453	8330	8591	8654	8468.2
731	11269	11638	11099	11282	11118	11281.2		11297	11374	11273	11672	11737	11470.6		11355	11587	11704	11819	11798	11652.6		11185	11383	10933	11133	10772	11081.2		10087	10436	9572	9743	10234	10014.4		9264	9159	9205	9147	9180	9191		8335	8485	8356	8611	8675	8492.4
732	11305	11676	11146	11319	11164	11322		11337	11410	11316	11717	11782	11512.4		11387	11629	11742	11866	11848	11694.4		11210	11419	10962	11183	10810	11116.8		10120	10480	9608	9777	10274	10051.8		9299	9190	9240	9172	9211	9222.4		8362	8510	8383	8638	8705	8519.6
733	11339	11712	11188	11354	11201	11358.8		11379	11454	11358	11762	11834	11557.4		11423	11674	11787	11912	11881	11735.4		11247	11445	11011	11207	10840	11150		10161	10516	9650	9821	10319	10093.4		9341	9227	9281	9194	9252	9259		8387	8547	8418	8668	8748	8553.6
734	11383	11754	11241	11392	11249	11403.8		11410	11484	11396	11794	11892	11595.2		11458	11720	11832	11950	11916	11775.2		11281	11481	11048	11248	10873	11186.2		10202	10553	9684	9855	10344	10127.6		9368	9261	9314	9233	9290	9293.2		8409	8576	8449	8699	8772	8581
735	11422	11802	11280	11437	11289	11446		11453	11512	11440	11841	11934	11636		11484	11763	11872	11983	11961	11812.6		11316	11521	11080	11301	10912	11226		10236	10593	9727	9890	10371	10163.4		9397	9286	9345	9269	9320	9323.4		8433	8608	8478	8730	8789	8607.6
736	11474	11850	11327	11484	11328	11492.6		11499	11542	11475	11871	11977	11672.8		11527	11803	11912	12022	11999	11852.6		11353	11559	11123	11339	10949	11264.6		10284	10627	9762	9939	10412	10204.8		9416	9325	9373	9293	9354	9352.2		8461	8646	8505	8769	8825	8641.2
737	11514	11901	11364	11531	11365	11535		11540	11575	11510	11909	12031	11713		11573	11840	11956	12068	12025	11892.4		11387	11601	11164	11375	10979	11301.2		10335	10668	9800	9969	10447	10243.8		9454	9353	9407	9331	9391	9387.2		8485	8671	8538	8802	8859	8671
738	11552	11946	11415	11577	11400	11578		11579	11616	11545	11976	12068	11756.8		11609	11877	11993	12116	12067	11932.4		11427	11644	11191	11412	11025	11339.8		10369	10724	9843	9993	10487	10283.2		9498	9374	9444	9357	9422	9419		8517	8699	8558	8845	8886	8701
739	11593	11992	11453	11634	11445	11623.4		11612	11660	11577	12023	12117	11797.8		11638	11922	12025	12159	12109	11970.6		11463	11677	11232	11443	11063	11375.6		10409	10747	9883	10035	10521	10319		9519	9395	9476	9387	9449	9445.2		8540	8727	8582	8871	8914	8726.8
740	11638	12041	11493	11677	11494	11668.6		11649	11702	11619	12072	12150	11838.4		11673	11968	12065	12201	12164	12014.2		11503	11707	11262	11480	11103	11411		10445	10781	9922	10069	10566	10356.6		9548	9433	9504	9416	9480	9476.2		8567	8754	8609	8900	8938	8753.6
741	11684	12086	11544	11716	11529	11711.8		11689	11742	11659	12115	12197	11880.4		11707	12013	12114	12236	12214	12056.8		11542	11750	11298	11525	11143	11451.6		10486	10819	9964	10113	10606	10397.6		9572	9463	9544	9449	9510	9507.6		8599	8791	8639	8921	8970	8784
742	11726	12126	11595	11745	11559	11750.2		11741	11798	11699	12158	12242	11927.6		11736	12046	12166	12274	12254	12095.2		11581	11787	11330	11570	11172	11488		10524	10849	9998	10157	10638	10433.2		9603	9499	9574	9491	9540	9541.4		8642	8831	8670	8949	8998	8818
743	11784	12171	11631	11785	11607	11795.6		11790	11841	11736	12196	12279	11968.4		11767	12097	12203	12319	12291	12135.4		11625	11830	11375	11604	11206	11528		10547	10893	10043	10193	10665	10468.2		9640	9530	9606	9517	9568	9572.2		8676	8864	8698	8983	9031	8850.4
744	11830	12222	11680	11822	11652	11841.2		11824	11892	11779	12245	12323	12012.6		11797	12148	12233	12362	12332	12174.4		11673	11874	11408	11653	11246	11570.8		10588	10928	10074	10236	10698	10504.8		9670	9561	9655	9541	9611	9607.6		8698	8897	8726	9006	9061	8877.6
745	11874	12263	11720	11869	11681	11881.4		11858	11938	11822	12301	12372	12058.2		11826	12184	12273	12410	12377	12214		11725	11910	11434	11689	11288	11609.2		10617	10963	10110	10268	10740	10539.6		9712	9597	9688	9582	9649	9645.6		8709	8930	8762	9046	9078	8905
746	11908	12302	11777	11912	11725	11924.8		11903	11974	11865	12354	12402	12099.6		11866	12219	12308	12457	12419	12253.8		11766	11957	11471	11720	11329	11648.6		10652	11005	10148	10304	10783	10578.4		9742	9622	9712	9607	9670	9670.6		8748	8967	8792	9079	9116	8940.4
747	11948	12365	11810	11961	11775	11971.8		11944	12028	11899	12395	12448	12142.8		11895	12262	12340	12496	12465	12291.6		11805	12002	11505	11762	11366	11688		10693	11039	10179	10340	10823	10614.8		9771	9652	9746	9634	9700	9700.6		8776	9002	8819	9114	9149	8972
748	11994	12419	11848	12010	11820	12018.2		11989	12078	11936	12437	12491	12186.2		11930	12303	12381	12544	12512	12334		11839	12046	11547	11805	11402	11727.8		10719	11083	10213	10373	10857	10649		9819	9693	9782	9679	9730	9740.6		8799	9035	8847	9144	9181	9001.2
749	12050	12463	11892	12061	11873	12067.8		12019	12124	11983	12486	12540	12230.4		11968	12336	12407	12590	12551	12370.4		11885	12089	11594	11855	11438	11772.2		10768	11119	10248	10406	10884	10685		9848	9727	9827	9712	9766	9776		8821	9067	8888	9171	9214	9032.2
750	12087	12513	11953	12117	11913	12116.6		12058	12166	12029	12536	12584	12274.6		12004	12394	12457	12635	12590	12416		11918	12137	11623	11882	11478	11807.6		10818	11158	10278	10441	10913	10721.6		9883	9754	9870	9741	9807	9811		8856	9095	8915	9210	9238	9062.8
751	12143	12565	12009	12161	11963	12168.2		12094	12201	12074	12580	12623	12314.4		12039	12439	12501	12666	12623	12453.6		11973	12174	11666	11925	11521	11851.8		10851	11199	10310	10482	10948	10758		9924	9780	9916	9783	9835	9847.6		8876	9132	8943	9246	9270	9093.4
752	12187	12614	12049	12202	12014	12213.2		12136	12255	12120	12615	12665	12358.2		12066	12492	12556	12699	12665	12495.6		12007	12228	11701	11969	11567	11894.4		10894	11240	10349	10509	10976	10793.6		9962	9811	9958	9815	9865	9882.2		8908	9162	8976	9277	9302	9125
753	12220	12659	12101	12245	12059	12256.8		12177	12302	12162	12647	12707	12399		12110	12533	12594	12733	12705	12535		12048	12266	11735	12013	11600	11932.4		10935	11271	10386	10543	11023	10831.6		9991	9838	10002	9861	9899	9918.2		8937	9187	9011	9302	9330	9153.4
754	12269	12705	12149	12289	12100	12302.4		12220	12339	12208	12687	12759	12442.6		12157	12588	12637	12781	12749	12582.4		12092	12318	11771	12060	11636	11975.4		10974	11305	10414	10581	11043	10863.4		10024	9867	10038	9890	9941	9952		8957	9209	9046	9333	9363	9181.6
755	12303	12744	12196	12332	12134	12341.8		12256	12397	12252	12732	12806	12488.6		12202	12635	12677	12824	12795	12626.6		12131	12368	11808	12112	11681	12020		11008	11340	10445	10616	11087	10899.2		10050	9897	10074	9922	9961	9980.8		8988	9242	9074	9357	9387	9209.6
756	12339	12777	12247	12369	12171	12380.6		12296	12447	12307	12779	12842	12534.2		12243	12672	12719	12861	12842	12667.4		12175	12405	11847	12152	11729	12061.6		11057	11370	10474	10648	11126	10935		10075	9932	10110	9965	9994	10015.2		9008	9275	9105	9384	9419	9238.2
757	12370	12824	12290	12419	12207	12422		12339	12488	12350	12827	12882	12577.2		12275	12717	12769	12916	12887	12712.8		12206	12442	11889	12186	11771	12098.8		11103	11403	10523	10693	11162	10976.8		10115	9967	10140	9994	10030	10049.2		9038	9308	9128	9412	9461	9269.4
758	12423	12865	12331	12461	12250	12466		12378	12530	12395	12877	12923	12620.6		12309	12757	12821	12953	12931	12754.2		12251	12486	11937	12225	11812	12142.2		11145	11441	10562	10728	11181	11011.4		10151	10006	10169	10026	10055	10081.4		9065	9338	9163	9444	9496	9301.2
759	12456	12913	12373	12504	12301	12509.4		12427	12594	12436	12920	12975	12670.4		12346	12806	12857	13005	12970	12796.8		12296	12529	11977	12283	11853	12187.6		11174	11473	10591	10754	11217	11041.8		10196	10031	10215	10062	10098	10120.4		9092	9360	9191	9479	9527	9329.8
760	12500	12973	12421	12547	12339	12556		12465	12641	12494	12952	13028	12716		12381	12846	12892	13034	13013	12833.2		12337	12575	12017	12334	11881	12228.8		11206	11502	10628	10792	11262	11078		10222	10069	10259	10090	10127	10153.4		9122	9389	9221	9519	9561	9362.4
761	12540	13022	12456	12596	12384	12599.6		12515	12693	12540	12990	13068	12761.2		12414	12886	12938	13068	13060	12873.2		12383	12616	12074	12383	11926	12276.4		11247	11560	10670	10828	11314	11123.8		10249	10109	10307	10119	10167	10190.2		9152	9423	9254	9543	9588	9392
762	12594	13073	12492	12649	12419	12645.4		12551	12745	12569	13035	13106	12801.2		12459	12929	12978	13108	13113	12917.4		12410	12663	12110	12416	11965	12312.8		11290	11602	10705	10867	11349	11162.6		10274	10136	10337	10152	10197	10219.2		9176	9458	9288	9574	9618	9422.8
763	12633	13115	12540	12687	12463	12687.6		12593	12791	12610	13079	13155	12845.6		12498	12978	13024	13158	13151	12961.8		12442	12711	12162	12462	12006	12356.6		11317	11643	10737	10899	11379	11195		10315	10186	10361	10186	10235	10256.6		9197	9492	9320	9602	9660	9454.2
764	12687	13158	12589	12739	12505	12735.6		12638	12836	12664	13135	13211	12896.8		12528	13027	13074	13211	13199	13007.8		12486	12761	12209	12508	12052	12403.2		11359	11679	10774	10937	11416	11233		10366	10218	10406	10221	10259	10294		9224	9519	9351	9626	9698	9483.6
765	12728	13209	12631	12791	12538	12779.4		12685	12869	12713	13178	13265	12942		12574	13073	13120	13253	13248	13053.6		12524	12809	12241	12551	12089	12442.8		11397	11709	10805	10988	11463	11272.4		10404	10246	10442	10257	10292	10328.2		9261	9544	9383	9654	9723	9513
766	12781	13255	12679	12849	12575	12827.8		12723	12918	12752	13236	13309	12987.6		12611	13105	13158	13316	13291	13096.2		12578	12856	12284	12583	12118	12483.8		11437	11752	10839	11024	11501	11310.6		10430	10281	10479	10291	10325	10361.2		9292	9573	9405	9684	9756	9542
767	12822	13298	12721	12885	12626	12870.4		12766	12956	12793	13282	13368	13033		12642	13153	13192	13352	13342	13136.2		12622	12887	12321	12630	12154	12522.8		11482	11782	10866	11054	11537	11344.2		10468	10313	10527	10328	10359	10399		9321	9612	9431	9721	9787	9574.4
768	12872	13346	12773	12939	12673	12920.6		12805	12996	12829	13331	13414	13075		12687	13203	13231	13391	13402	13182.8		12656	12934	12370	12672	12206	12567.6		11505	11814	10893	11097	11581	11378		10512	10350	10561	10351	10399	10434.6		9347	9631	9466	9753	9818	9603
769	12936	13392	12827	12983	12722	12972		12849	13039	12873	13380	13467	13121.6		12720	13254	13288	13442	13446	13230		12706	12977	12424	12716	12248	12614.2		11548	11859	10925	11137	11618	11417.4		10555	10375	10594	10383	10444	10470.2		9366	9669	9504	9797	9860	9639.2
770	12978	13446	12873	13024	12757	13015.6		12889	13091	12915	13437	13516	13169.6		12768	13306	13332	13486	13489	13276.2		12741	13015	12477	12764	12281	12655.6		11595	11906	10964	11166	11652	11456.6		10584	10403	10633	10411	10489	10504		9394	9711	9531	9821	9895	9670.4
771	13021	13496	12916	13079	12805	13063.4		12927	13134	12963	13494	13561	13215.8		12822	13362	13386	13520	13543	13326.6		12780	13059	12514	12810	12311	12694.8		11640	11954	10998	11199	11709	11500		10628	10442	10666	10447	10526	10541.8		9408	9743	9554	9864	9939	9701.6
772	13077	13557	12968	13132	12853	13117.4		12979	13177	13004	13544	13612	13263.2		12853	13412	13428	13574	13586	13370.6		12825	13112	12554	12842	12357	12738		11679	11990	11031	11229	11757	11537.2		10668	10468	10701	10484	10550	10574.2		9436	9770	9587	9907	9972	9734.4
773	13118	13599	13012	13189	12896	13162.8		13038	13209	13053	13592	13653	13309		12893	13457	13465	13619	13635	13413.8		12873	13153	12597	12892	12404	12783.8		11723	12022	11073	11268	11804	11578		10698	10499	10742	10525	10590	10610.8		9467	9807	9618	9942	10009	9768.6
774	13174	13646	13056	13233	12945	13210.8		13072	13254	13098	13647	13703	13354.8		12947	13490	13526	13661	13675	13459.8		12919	13203	12644	12932	12447	12829		11767	12062	11107	11312	11852	11620		10727	10528	10784	10563	10623	10645		9497	9843	9652	9975	10037	9800.8
775	13215	13699	13109	13285	13004	13262.4		13118	13296	13119	13694	13750	13395.4		12990	13528	13573	13705	13724	13504		12963	13251	12688	12966	12492	12872		11806	12102	11138	11352	11894	11658.4		10766	10564	10822	10606	10656	10682.8		9522	9878	9685	10014	10073	9834.4
776	13259	13742	13168	13336	13055	13312		13160	13341	13166	13748	13791	13441.2		13037	13571	13606	13746	13768	13545.6		13006	13305	12739	13009	12542	12920.2		11844	12140	11180	11390	11929	11696.6		10797	10600	10856	10641	10690	10716.8		9551	9911	9715	10047	10103	9865.4
777	13307	13792	13219	13378	13106	13360.4		13204	13396	13196	13790	13837	13484.6		13074	13608	13649	13783	13822	13587.2		13048	13352	12788	13047	12578	12962.6		11887	12186	11219	11431	11963	11737.2		10836	10641	10893	10671	10737	10755.6		9586	9937	9743	10086	10139	9898.2
778	13341	13842	13264	13427	13160	13406.8		13240	13458	13245	13849	13893	13537		13133	13653	13698	13827	13878	13637.8		13091	13402	12820	13081	12622	13003.2		11927	12218	11265	11464	12006	11776		10871	10682	10920	10722	10782	10795.4		9614	9959	9784	10123	10167	9929.4
779	13390	13890	13312	13478	13217	13457.4		13279	13520	13300	13893	13946	13587.6		13186	13699	13741	13880	13935	13688.2		13138	13451	12870	13132	12656	13049.4		11969	12268	11302	11508	12051	11819.6		10908	10718	10963	10763	10829	10836.2		9654	9986	9815	10156	10196	9961.4
780	13439	13936	13376	13534	13261	13509.2		13316	13576	13339	13954	14005	13638		13233	13756	13799	13924	13982	13738.8		13187	13503	12910	13177	12703	13096		12002	12300	11337	11566	12101	11861.2		10949	10749	10993	10804	10868	10872.6		9680	10018	9852	10184	10230	9992.8
781	13497	13998	13415	13590	13306	13561.2		13358	13614	13398	14016	14054	13688		13289	13802	13846	13975	14032	13788.8		13232	13545	12969	13231	12741	13143.6		12033	12341	11367	11611	12133	11897		10981	10787	11024	10839	10916	10909.4		9707	10056	9890	10221	10255	10025.8
782	13543	14057	13468	13654	13354	13615.2		13389	13657	13454	14072	14109	13736.2		13349	13856	13877	14018	14092	13838.4		13279	13582	13006	13279	12796	13188.4		12072	12383	11404	11650	12171	11936		11011	10825	11045	10876	10952	10941.8		9744	10087	9920	10258	10290	10059.8
783	13589	14096	13511	13714	13411	13664.2		13441	13713	13504	14131	14166	13791		13405	13911	13920	14065	14145	13889.2		13323	13630	13049	13319	12847	13233.6		12108	12419	11451	11691	12214	11976.6		11050	10856	11084	10908	10993	10978.2		9771	10127	9946	10289	10322	10091
784	13645	14161	13561	13757	13463	13717.4		13483	13758	13575	14169	14233	13843.6		13470	13959	13970	14127	14201	13945.4		13383	13678	13097	13364	12887	13281.8		12159	12463	11493	11743	12256	12022.8		11096	10893	11117	10945	11031	11016.4		9804	10156	9975	10323	10357	10123
785	13698	14198	13609	13792	13518	13763		13536	13802	13624	14208	14287	13891.4		13527	14005	14008	14170	14244	13990.8		13413	13734	13141	13403	12936	13325.4		12209	12504	11541	11782	12298	12066.8		11149	10928	11153	10981	11062	11054.6		9842	10192	9997	10355	10380	10153.2
786	13770	14236	13676	13848	13563	13818.6		13576	13848	13677	14267	14329	13939.4		13580	14062	14085	14226	14278	14046.2		13455	13778	13189	13451	12979	13370.4		12242	12545	11579	11828	12350	12108.8		11186	10970	11187	11020	11099	11092.4		9878	10219	10025	10381	10408	10182.2
787	13822	14287	13721	13895	13617	13868.4		13627	13912	13724	14317	14381	13992.2		13634	14107	14138	14269	14334	14096.4		13512	13810	13228	13501	13018	13413.8		12268	12586	11630	11869	12389	12148.4		11225	11005	11232	11051	11129	11128.4		9910	10255	10065	10426	10447	10220.6
788	13863	14336	13758	13950	13664	13914.2		13665	13961	13769	14362	14425	14036.4		13690	14167	14191	14316	14387	14150.2		13554	13860	13270	13550	13063	13459.4		12316	12621	11675	11905	12429	12189.2		11268	11040	11276	11094	11159	11167.4		9950	10288	10113	10453	10468	10254.4
789	13906	14389	13816	14005	13721	13967.4		13708	14023	13802	14410	14469	14082.4		13745	14219	14234	14373	14456	14205.4		13609	13903	13320	13592	13117	13508.2		12347	12654	11725	11938	12470	12226.8		11308	11073	11322	11135	11189	11205.4		9986	10334	10154	10490	10490	10290.8
790	13952	14439	13874	14069	13768	14020.4		13764	14070	13849	14474	14523	14136		13793	14254	14278	14427	14511	14252.6		13659	13955	13376	13638	13152	13556		12378	12685	11762	11985	12504	12262.8		11356	11114	11367	11177	11224	11247.6		10031	10375	10196	10519	10521	10328.4
791	13999	14483	13919	14131	13824	14071.2		13821	14126	13910	14538	14579	14194.8		13836	14303	14322	14472	14561	14298.8		13705	13998	13425	13675	13191	13598.8		12423	12741	11799	12025	12543	12306.2		11403	11153	11411	11217	11259	11288.6		10064	10409	10232	10557	10550	10362.4
792	14059	14538	13971	14178	13868	14122.8		13876	14166	13953	14609	14647	14250.2		13867	14343	14364	14522	14615	14342.2		13748	14044	13463	13718	13228	13640.2		12478	12778	11845	12065	12585	12350.2		11445	11199	11447	11256	11301	11329.6		10097	10451	10267	10592	10586	10398.6
793	14119	14589	14020	14226	13934	14177.6		13920	14222	13999	14664	14686	14298.2		13923	14408	14405	14572	14670	14395.6		13801	14098	13511	13754	13271	13687		12528	12825	11886	12115	12620	12394.8		11483	11244	11492	11300	11346	11373		10137	10492	10310	10620	10619	10435.6
794	14165	14645	14063	14279	13989	14228.2		13963	14275	14059	14715	14738	14350		13969	14454	14460	14624	14722	14445.8		13848	14138	13550	13804	13322	13732.4		12562	12865	11929	12151	12654	12432.2		11514	11271	11533	11341	11382	11408.2		10167	10534	10337	10658	10652	10469.6
795	14206	14700	14110	14328	14037	14276.2		14006	14328	14108	14768	14788	14399.6		14015	14497	14507	14678	14768	14493		13894	14203	13590	13849	13367	13780.6		12603	12913	11976	12196	12692	12476		11541	11313	11580	11391	11433	11451.6		10203	10568	10378	10678	10687	10502.8
796	14259	14752	14153	14372	14089	14325		14053	14380	14169	14816	14839	14451.4		14053	14554	14573	14736	14813	14545.8		13942	14260	13638	13891	13409	13828		12645	12957	12015	12229	12727	12514.6		11581	11361	11621	11433	11465	11492.2		10237	10604	10409	10720	10723	10538.6
797	14316	14807	14212	14441	14145	14384.2		14110	14441	14223	14878	14891	14508.6		14105	14606	14612	14796	14874	14598.6		14012	14314	13687	13937	13469	13883.8		12686	12998	12054	12269	12764	12554.2		11621	11405	11660	11470	11495	11530.2		10269	10636	10445	10764	10747	10572.2
798	14365	14860	14260	14492	14211	14437.6		14159	14498	14282	14929	14940	14561.6		14169	14672	14657	14850	14931	14655.8		14051	14353	13744	13998	13508	13930.8		12722	13037	12095	12310	12800	12592.8		11658	11444	11702	11514	11555	11574.6		10299	10666	10485	10790	10782	10604.4
799	14427	14912	14304	14545	14258	14489.2		14209	14554	14331	14982	14997	14614.6		14227	14717	14696	14901	14991	14706.4		14095	14408	13800	14040	13545	13977.6		12771	13070	12129	12360	12839	12633.8		11695	11478	11756	11552	11593	11614.8		10323	10691	10512	10828	10819	10634.6
800	14487	14969	14367	14598	14295	14543.2		14251	14609	14371	15023	15046	14660		14279	14761	14743	14954	15051	14757.6		14149	14459	13856	14089	13606	14031.8		12811	13117	12167	12399	12882	12675.2		11738	11518	11805	11605	11623	11657.8		10361	10737	10541	10857	10856	10670.4
801	14527	15015	14418	14657	14347	14592.8		14306	14666	14417	15075	15103	14713.4		14326	14824	14802	14996	15102	14810		14199	14529	13890	14130	13652	14080		12866	13156	12201	12436	12922	12716.2		11781	11562	11850	11645	11667	11701		10395	10767	10577	10887	10886	10702.4
802	14589	15067	14466	14714	14389	14645		14351	14722	14484	15132	15146	14767		14376	14882	14851	15061	15152	14864.4		14252	14584	13932	14185	13702	14131		12907	13211	12258	12479	12968	12764.6		11840	11613	11891	11690	11719	11750.6		10423	10810	10599	10927	10926	10737
803	14647	15121	14513	14760	14437	14695.6		14409	14775	14532	15185	15198	14819.8		14439	14936	14912	15107	15220	14922.8		14294	14647	13987	14230	13759	14183.4		12940	13258	12299	12524	13024	12809		11883	11641	11933	11737	11749	11788.6		10447	10842	10632	10970	10967	10771.6
804	14690	15167	14571	14819	14486	14746.6		14462	14822	14597	15230	15257	14873.6		14496	14985	14958	15163	15283	14977		14343	14698	14038	14281	13796	14231.2		12981	13299	12341	12567	13062	12850		11924	11683	11960	11783	11782	11826.4		10474	10878	10671	11004	10998	10805
805	14753	15225	14636	14877	14534	14805		14519	14877	14656	15290	15305	14929.4		14562	15045	15000	15229	15331	15033.4		14393	14746	14093	14330	13853	14283		13017	13368	12387	12610	13103	12897		11977	11727	11999	11822	11830	11871		10516	10917	10703	11037	11041	10842.8
806	14824	15285	14684	14920	14584	14859.4		14574	14933	14710	15357	15366	14988		14610	15104	15050	15286	15391	15088.2		14441	14794	14155	14373	13922	14337		13066	13415	12435	12651	13161	12945.6		12015	11763	12052	11856	11872	11911.6		10559	10947	10748	11073	11078	10881
807	14885	15323	14728	14984	14639	14911.8		14629	14976	14769	15407	15416	15039.4		14655	15154	15117	15351	15437	15142.8		14497	14847	14195	14423	13965	14385.4		13118	13447	12477	12707	13217	12993.2		12055	11808	12094	11898	11912	11953.4		10587	10995	10781	11108	11111	10916.4
808	14933	15376	14799	15047	14695	14970		14680	15028	14825	15440	15471	15088.8		14707	15211	15188	15411	15490	15201.4		14547	14889	14249	14478	14014	14435.4		13171	13489	12513	12756	13271	13040		12095	11842	12126	11946	11944	11990.6		10621	11035	10808	11139	11155	10951.6
809	14988	15429	14855	15109	14753	15026.8		14756	15090	14886	15505	15535	15154.4		14778	15257	15237	15476	15554	15260.4		14608	14948	14305	14519	14062	14488.4		13218	13526	12545	12798	13315	13080.4		12136	11882	12164	11996	11982	12032		10654	11074	10846	11173	11199	10989.2
810	15040	15480	14915	15164	14803	15080.4		14811	15132	14940	15557	15597	15207.4		14823	15313	15305	15542	15602	15317		14660	15003	14359	14570	14109	14540.2		13258	13571	12588	12849	13370	13127.2		12186	11925	12205	12035	12021	12074.4		10695	11114	10889	11211	11229	11027.6
811	15091	15544	14979	15221	14858	15138.6		14866	15181	15012	15622	15648	15265.8		14881	15372	15358	15604	15671	15377.2		14715	15050	14413	14612	14143	14586.6		13311	13613	12639	12884	13425	13174.4		12215	11965	12240	12064	12065	12109.8		10731	11149	10935	11268	11263	11069.2
812	15147	15605	15050	15274	14924	15200		14927	15232	15061	15690	15703	15322.6		14930	15416	15410	15665	15725	15429.2		14764	15107	14467	14662	14191	14638.2		13366	13669	12682	12922	13462	13220.2		12264	11997	12282	12107	12110	12152		10770	11184	10975	11294	11311	11106.8
813	15202	15671	15099	15319	14979	15254		14978	15284	15109	15743	15748	15372.4		14981	15471	15487	15715	15785	15487.8		14803	15158	14512	14731	14246	14690		13417	13717	12730	12958	13503	13265		12314	12038	12321	12150	12150	12194.6		10816	11234	11005	11322	11339	11143.2
814	15255	15730	15147	15371	15030	15306.6		15043	15336	15156	15791	15805	15426.2		15047	15518	15549	15778	15828	15544		14851	15214	14566	14799	14290	14744		13470	13768	12777	13006	13545	13313.2		12348	12070	12374	12204	12194	12238		10859	11276	11048	11353	11383	11183.8
815	15315	15803	15193	15430	15088	15365.8		15100	15389	15216	15847	15862	15482.8		15110	15580	15611	15847	15882	15606		14908	15268	14621	14845	14329	14794.2		13514	13816	12822	13045	13582	13355.8		12390	12097	12417	12248	12227	12275.8		10888	11319	11083	11388	11419	11219.4
816	15381	15862	15245	15500	15143	15426.2		15161	15447	15274	15900	15911	15538.6		15155	15635	15679	15916	15922	15661.4		14967	15321	14672	14896	14384	14848		13551	13871	12876	13090	13626	13402.8		12434	12147	12450	12281	12278	12318		10920	11355	11112	11433	11462	11256.4
817	15423	15915	15303	15564	15199	15480.8		15219	15504	15335	15957	15969	15596.8		15233	15700	15730	15973	15987	15724.6		15021	15365	14730	14950	14435	14900.2		13591	13916	12918	13128	13669	13444.4		12475	12203	12499	12331	12327	12367		10964	11392	11157	11460	11499	11294.4
818	15488	15965	15364	15623	15278	15543.6		15283	15558	15395	16017	16022	15655		15294	15760	15788	16040	16031	15782.6		15076	15419	14779	15015	14490	14955.8		13640	13967	12954	13162	13720	13488.6		12512	12238	12537	12368	12357	12402.4		11015	11435	11198	11500	11534	11336.4
819	15548	16026	15417	15680	15340	15602.2		15334	15614	15462	16066	16081	15711.4		15343	15823	15847	16109	16098	15844		15134	15473	14825	15063	14534	15005.8		13689	14018	12983	13201	13760	13530.2		12564	12269	12581	12412	12397	12444.6		11057	11474	11231	11545	11573	11376
820	15602	16089	15486	15742	15398	15663.4		15407	15664	15519	16106	16140	15767.2		15397	15886	15904	16173	16147	15901.4		15197	15542	14868	15120	14588	15063		13740	14077	13018	13255	13805	13579		12614	12307	12628	12458	12439	12489.2		11088	11516	11267	11573	11607	11410.2
821	15668	16149	15516	15805	15454	15718.4		15482	15722	15572	16154	16185	15823		15468	15942	15965	16241	16207	15964.6		15258	15589	14916	15174	14639	15115.2		13789	14137	13060	13311	13855	13630.4		12644	12351	12665	12497	12470	12525.4		11119	11553	11301	11614	11646	11446.6
822	15732	16204	15574	15871	15507	15777.6		15536	15762	15633	16210	16236	15875.4		15525	15989	16037	16305	16265	16024.2		15318	15641	14960	15224	14695	15167.6		13832	14192	13098	13361	13909	13678.4		12682	12405	12711	12543	12522	12572.6		11170	11596	11337	11645	11683	11486.2
823	15802	16253	15638	15928	15577	15839.6		15604	15813	15687	16267	16293	15932.8		15577	16043	16087	16374	16312	16078.6		15367	15699	15006	15277	14741	15218		13875	14234	13148	13410	13944	13722.2		12728	12459	12766	12593	12565	12622.2		11216	11644	11373	11685	11723	11528.2
824	15860	16318	15694	15992	15631	15899		15652	15869	15733	16306	16354	15982.8		15642	16104	16137	16418	16366	16133.4		15430	15750	15064	15335	14797	15275.2		13918	14294	13198	13457	14005	13774.4		12772	12509	12815	12639	12606	12668.2		11261	11681	11418	11724	11769	11570.6
825	15924	16392	15765	16059	15687	15965.4		15711	15922	15797	16369	16394	16038.6		15712	16167	16189	16471	16424	16192.6		15483	15814	15116	15398	14845	15331.2		13966	14336	13245	13505	14058	13822		12816	12561	12870	12677	12648	12714.4		11305	11721	11455	11755	11813	11609.8
826	15998	16443	15816	16126	15756	16027.8		15765	15990	15857	16418	16448	16095.6		15763	16236	16255	16539	16470	16252.6		15531	15878	15167	15447	14908	15386.2		14021	14385	13296	13541	14097	13868		12874	12602	12907	12717	12706	12761.2		11343	11753	11488	11791	11856	11646.2
827	16050	16506	15888	16193	15816	16090.6		15827	16056	15927	16489	16504	16160.6		15823	16286	16314	16608	16539	16314		15598	15938	15228	15485	14965	15442.8		14059	14435	13331	13588	14152	13913		12922	12657	12957	12750	12758	12808.8		11381	11792	11532	11827	11897	11685.8
828	16109	16563	15935	16250	15875	16146.4		15888	16104	15997	16550	16586	16225		15881	16342	16378	16686	16598	16377		15657	15994	15282	15535	15007	15495		14096	14477	13385	13627	14202	13957.4		12969	12701	12996	12789	12801	12851.2		11424	11828	11574	11862	11944	11726.4
829	16181	16616	16003	16308	15928	16207.2		15945	16164	16053	16614	16646	16284.4		15945	16403	16438	16765	16657	16441.6		15707	16050	15330	15578	15073	15547.6		14144	14521	13427	13674	14257	14004.6		13011	12733	13042	12821	12845	12890.4		11447	11863	11624	11908	11979	11764.2
830	16248	16670	16063	16377	15994	16270.4		16005	16219	16111	16669	16692	16339.2		16020	16454	16509	16811	16730	16504.8		15771	16112	15392	15642	15107	15604.8		14190	14578	13477	13724	14298	14053.4		13057	12773	13080	12861	12875	12929.2		11488	11896	11660	11939	12027	11802
831	16306	16728	16122	16438	16057	16330.2		16076	16275	16161	16724	16763	16399.8		16085	16517	16575	16880	16802	16571.8		15843	16166	15439	15692	15162	15660.4		14251	14635	13525	13777	14353	14108.2		13096	12829	13128	12904	12920	12975.4		11516	11942	11687	11996	12058	11839.8
832	16357	16782	16176	16499	16119	16386.6		16138	16352	16215	16786	16811	16460.4		16153	16570	16633	16945	16865	16633.2		15903	16222	15482	15741	15216	15712.8		14301	14668	13574	13826	14411	14156		13127	12880	13184	12959	12962	13022.4		11549	11968	11719	12032	12096	11872.8
833	16425	16843	16237	16552	16187	16448.8		16217	16407	16269	16831	16885	16521.8		16218	16614	16703	17005	16911	16690.2		15968	16277	15547	15795	15270	15771.4		14376	14717	13631	13885	14455	14212.8		13172	12922	13224	13007	13004	13065.8		11593	12005	11769	12068	12133	11913.6
834	16479	16916	16295	16621	16253	16512.8		16277	16467	16332	16890	16947	16582.6		16280	16679	16766	17078	16975	16755.6		16020	16335	15601	15848	15329	15826.6		14429	14770	13678	13935	14518	14266		13217	12959	13266	13059	13048	13109.8		11635	12046	11810	12106	12171	11953.6
835	16556	16982	16368	16692	16315	16582.6		16342	16516	16395	16956	17011	16644		16346	16746	16826	17153	17051	16824.4		16089	16397	15651	15912	15390	15887.8		14474	14821	13717	13998	14575	14317		13261	13014	13310	13099	13096	13156		11680	12087	11856	12143	12213	11995.8
836	16603	17050	16433	16740	16378	16640.8		16405	16580	16456	17022	17072	16707		16393	16806	16887	17223	17113	16884.4		16144	16451	15700	15978	15453	15945.2		14519	14883	13762	14040	14627	14366.2		13305	13049	13357	13152	13141	13200.8		11712	12127	11888	12199	12249	12035
837	16656	17107	16511	16817	16441	16706.4		16465	16630	16525	17082	17135	16767.4		16447	16854	16958	17295	17192	16949.2		16198	16498	15753	16035	15511	15999		14575	14933	13814	14087	14678	14417.4		13353	13094	13390	13217	13174	13245.6		11749	12169	11927	12233	12298	12075.2
838	16714	17167	16596	16873	16512	16772.4		16511	16692	16600	17131	17200	16826.8		16503	16909	17032	17360	17260	17012.8		16258	16551	15804	16100	15572	16057		14625	14985	13859	14156	14723	14469.6		13402	13143	13425	13257	13222	13289.8		11781	12209	11968	12279	12335	12114.4
839	16785	17235	16657	16923	16565	16833		16574	16742	16669	17177	17255	16883.4		16572	16976	17083	17440	17319	17078		16316	16614	15845	16153	15615	16108.6		14675	15040	13899	14213	14781	14521.6		13447	13196	13474	13292	13260	13333.8		11830	12252	12021	12321	12371	12159
840	16841	17294	16713	16971	16628	16889.4		16633	16795	16719	17253	17323	16944.6		16643	17029	17152	17506	17383	17142.6		16381	16669	15892	16215	15673	16166		14720	15100	13935	14259	14834	14569.6		13514	13245	13526	13336	13302	13384.6		11868	12308	12067	12353	12416	12202.4
841	16923	17358	16777	17033	16672	16952.6		16711	16848	16777	17314	17394	17008.8		16689	17080	17204	17564	17443	17196		16431	16723	15946	16275	15721	16219.2		14765	15147	13988	14305	14879	14616.8		13563	13290	13568	13393	13344	13431.6		11905	12362	12102	12388	12464	12244.2
842	16986	17427	16829	17089	16727	17011.6		16783	16905	16852	17386	17458	17076.8		16751	17138	17267	17619	17515	17258		16503	16772	16002	16336	15776	16277.8		14813	15191	14032	14365	14932	14666.6		13612	13339	13611	13438	13392	13478.4		11956	12399	12140	12431	12505	12286.2
843	17047	17476	16891	17159	16796	17073.8		16836	16976	16911	17436	17526	17137		16815	17200	17336	17682	17565	17319.6		16557	16839	16076	16402	15839	16342.6		14868	15249	14067	14402	14982	14713.6		13678	13381	13658	13478	13435	13526		12001	12440	12181	12474	12544	12328
844	17109	17545	16933	17225	16860	17134.4		16904	17036	16972	17491	17593	17199.2		16866	17261	17399	17742	17622	17378		16612	16901	16140	16448	15902	16400.6		14908	15291	14113	14442	15032	14757.2		13725	13429	13712	13539	13492	13579.4		12024	12487	12216	12511	12588	12365.2
845	17162	17623	16984	17284	16926	17195.8		16954	17099	17023	17552	17645	17254.6		16935	17332	17458	17809	17678	17442.4		16671	16960	16187	16522	15957	16459.4		14959	15335	14151	14500	15085	14806		13780	13476	13770	13574	13546	13629.2		12058	12516	12244	12545	12632	12399
846	17239	17683	17045	17349	16981	17259.4		17024	17161	17077	17613	17711	17317.2		17000	17392	17532	17861	17732	17503.4		16731	17016	16242	16568	16007	16512.8		15010	15389	14201	14557	15132	14857.8		13819	13529	13808	13619	13586	13672.2		12101	12562	12282	12594	12668	12441.4
847	17307	17757	17098	17414	17044	17324		17090	17231	17126	17662	17778	17377.4		17062	17446	17606	17922	17797	17566.6		16776	17089	16310	16621	16074	16574		15071	15453	14246	14594	15202	14913.2		13874	13571	13864	13667	13631	13721.4		12147	12609	12319	12643	12697	12483
848	17380	17804	17174	17480	17100	17387.6		17147	17288	17191	17726	17841	17438.6		17135	17502	17672	17984	17869	17632.4		16843	17142	16366	16678	16132	16632.2		15132	15514	14308	14640	15248	14968.4		13926	13625	13909	13722	13693	13775		12193	12657	12369	12680	12735	12526.8
849	17451	17879	17228	17534	17166	17451.6		17221	17354	17250	17784	17913	17504.4		17208	17575	17723	18058	17933	17699.4		16911	17219	16425	16740	16186	16696.2		15188	15559	14355	14700	15295	15019.4		13970	13668	13958	13761	13737	13818.8		12243	12697	12409	12719	12789	12571.4
850	17534	17945	17275	17603	17224	17516.2		17288	17432	17314	17850	17978	17572.4		17289	17641	17810	18123	17997	17772		16969	17279	16507	16791	16253	16759.8		15243	15608	14422	14761	15351	15077		14021	13720	14011	13813	13775	13868		12285	12746	12455	12762	12829	12615.4
851	17597	18020	17343	17652	17290	17580.4		17348	17498	17379	17922	18063	17642		17364	17714	17862	18200	18061	17840.2		17024	17332	16578	16863	16320	16823.4		15305	15659	14481	14808	15409	15132.4		14072	13762	14060	13849	13814	13911.4		12322	12790	12502	12804	12881	12659.8
852	17662	18073	17422	17714	17357	17645.6		17418	17554	17431	18005	18114	17704.4		17429	17780	17929	18270	18133	17908.2		17098	17394	16642	16933	16369	16887.2		15354	15733	14539	14858	15474	15191.6		14120	13806	14101	13888	13874	13957.8		12364	12839	12543	12851	12918	12703
853	17729	18129	17466	17795	17419	17707.6		17486	17615	17487	18068	18181	17767.4		17493	17845	17982	18332	18191	17968.6		17144	17464	16693	16989	16439	16945.8		15427	15783	14589	14914	15531	15248.8		14169	13859	14137	13937	13921	14004.6		12414	12881	12592	12898	12954	12747.8
854	17800	18202	17530	17843	17480	17771		17550	17677	17549	18135	18249	17832		17580	17906	18041	18403	18264	18038.8		17202	17528	16742	17029	16513	17002.8		15476	15852	14643	14966	15598	15307		14193	13902	14201	13993	13962	14050.2		12456	12924	12641	12941	13010	12794.4
855	17876	18255	17596	17889	17553	17833.8		17605	17749	17620	18206	18332	17902.4		17643	17974	18110	18479	18332	18107.6		17262	17607	16807	17095	16575	17069.2		15526	15921	14712	15017	15655	15366.2		14241	13963	14250	14035	14029	14103.6		12505	12967	12681	12989	13078	12844
856	17935	18322	17670	17954	17613	17898.8		17657	17827	17680	18270	18414	17969.6		17722	18027	18172	18543	18382	18169.2		17326	17685	16861	17157	16639	17133.6		15574	15995	14754	15077	15700	15420		14291	14019	14295	14083	14076	14152.8		12548	12998	12735	13030	13111	12884.4
857	18007	18393	17733	18027	17679	17967.8		17708	17891	17755	18350	18485	18037.8		17777	18097	18241	18614	18437	18233.2		17384	17753	16921	17212	16693	17192.6		15639	16056	14818	15127	15761	15480.2		14347	14064	14356	14142	14116	14205		12595	13041	12783	13076	13162	12931.4
858	18072	18459	17799	18087	17750	18033.4		17778	17951	17819	18426	18556	18106		17842	18169	18301	18680	18514	18301.2		17442	17817	16988	17264	16755	17253.2		15695	16125	14883	15177	15815	15539		14401	14120	14401	14200	14160	14256.4		12643	13077	12834	13136	13206	12979.2
859	18138	18530	17864	18164	17820	18103.2		17858	18012	17885	18496	18636	18177.4		17901	18229	18365	18743	18592	18366		17504	17888	17051	17328	16809	17316		15737	16175	14944	15231	15876	15592.6		14454	14154	14443	14261	14202	14302.8		12692	13121	12883	13174	13255	13025
860	18200	18610	17915	18243	17866	18166.8		17922	18083	17952	18572	18705	18246.8		17969	18293	18427	18810	18629	18425.6		17558	17949	17117	17399	16876	17379.8		15783	16229	14991	15277	15936	15643.2		14505	14211	14490	14315	14258	14355.8		12732	13165	12912	13223	13305	13067.4
861	18265	18671	17987	18306	17930	18231.8		17979	18155	18013	18640	18766	18310.6		18023	18349	18505	18873	18710	18492		17619	18014	17176	17467	16943	17443.8		15834	16300	15048	15316	15982	15696		14559	14266	14538	14374	14306	14408.6		12780	13201	12945	13277	13347	13110
862	18321	18748	18055	18378	18014	18303.2		18048	18213	18060	18707	18838	18373.2		18093	18415	18593	18932	18770	18560.6		17680	18071	17254	17538	16987	17506		15896	16358	15109	15372	16038	15754.6		14613	14322	14591	14423	14362	14462.2		12827	13243	12984	13333	13392	13155.8
863	18390	18826	18128	18446	18083	18374.6		18113	18285	18124	18778	18924	18444.8		18168	18488	18661	18998	18838	18630.6		17739	18143	17316	17598	17034	17566		15946	16407	15157	15422	16088	15804		14664	14362	14634	14477	14411	14509.6		12882	13289	13031	13380	13446	13205.6
864	18463	18880	18190	18518	18170	18444.2		18186	18346	18194	18839	18998	18512.6		18231	18550	18717	19058	18909	18693		17810	18204	17390	17659	17105	17633.6		15992	16465	15203	15475	16144	15855.8		14721	14409	14683	14542	14462	14563.4		12914	13343	13082	13431	13493	13252.6
865	18525	18950	18273	18606	18245	18519.8		18248	18399	18266	18910	19078	18580.2		18283	18626	18793	19124	18999	18765		17876	18271	17450	17730	17171	17699.6		16042	16528	15251	15542	16200	15912.6		14774	14466	14725	14592	14511	14613.6		12968	13386	13119	13486	13541	13300
866	18588	19030	18333	18673	18326	18590		18338	18462	18331	18983	19161	18655		18352	18701	18865	19199	19067	18836.8		17941	18334	17516	17807	17222	17764		16104	16594	15320	15595	16260	15974.6		14820	14518	14763	14638	14555	14658.8		13006	13430	13155	13532	13592	13343
867	18670	19100	18403	18740	18399	18662.4		18408	18523	18397	19049	19233	18722		18417	18776	18937	19272	19146	18909.6		18022	18422	17582	17865	17296	17837.4		16162	16652	15367	15646	16323	16030		14873	14563	14815	14684	14610	14709		13042	13476	13201	13582	13626	13385.4
868	18747	19174	18470	18803	18469	18732.6		18468	18600	18479	19123	19297	18793.4		18479	18844	19012	19337	19218	18978		18104	18487	17632	17952	17365	17908		16219	16718	15419	15701	16387	16088.8		14932	14610	14875	14739	14657	14762.6		13080	13521	13238	13629	13664	13426.4
869	18794	19252	18539	18858	18546	18797.8		18544	18669	18551	19187	19378	18865.8		18564	18905	19067	19419	19316	19054.2		18173	18566	17691	18016	17422	17973.6		16267	16775	15468	15750	16436	16139.2		14987	14671	14922	14797	14699	14815.2		13142	13574	13282	13670	13709	13475.4
870	18875	19333	18601	18918	18617	18868.8		18620	18749	18620	19258	19449	18939.2		18626	18967	19135	19491	19388	19121.4		18225	18644	17755	18089	17483	18039.2		16321	16844	15523	15806	16505	16199.8		15046	14711	14975	14846	14761	14867.8		13196	13615	13322	13711	13763	13521.4
871	18931	19412	18659	18985	18683	18934		18690	18801	18701	19323	19504	19003.8		18692	19038	19197	19558	19465	19190		18313	18714	17813	18152	17552	18108.8		16394	16921	15567	15855	16557	16258.8		15097	14776	15016	14895	14803	14917.4		13249	13663	13366	13751	13805	13566.8
872	19000	19467	18736	19037	18754	18998.8		18760	18860	18778	19395	19592	19077		18753	19114	19266	19626	19526	19257		18378	18773	17889	18215	17608	18172.6		16444	16981	15620	15913	16620	16315.6		15138	14830	15060	14943	14863	14966.8		13289	13709	13401	13797	13850	13609.2
873	19061	19529	18806	19110	18829	19067		18831	18929	18836	19466	19678	19148		18810	19184	19343	19685	19600	19324.4		18448	18839	17958	18284	17669	18239.6		16495	17055	15667	15971	16684	16374.4		15186	14878	15116	14997	14905	15016.4		13322	13754	13456	13836	13898	13653.2
874	19127	19610	18876	19178	18898	19137.8		18908	19003	18910	19554	19741	19223.2		18870	19266	19412	19746	19671	19393		18508	18918	18015	18342	17735	18303.6		16554	17134	15706	16019	16743	16431.2		15231	14929	15157	15046	14953	15063.2		13368	13803	13500	13895	13947	13702.6
875	19177	19669	18947	19234	18959	19197.2		18984	19067	18978	19615	19811	19291		18933	19327	19494	19807	19743	19460.8		18570	18981	18071	18425	17801	18369.6		16609	17189	15766	16078	16809	16490.2		15280	14977	15208	15093	15003	15112.2		13400	13841	13535	13947	14006	13745.8
876	19247	19748	19012	19285	19019	19262.2		19064	19137	19049	19687	19875	19362.4		18993	19392	19566	19880	19813	19528.8		18625	19059	18152	18497	17867	18440		16657	17241	15821	16143	16857	16543.8		15335	15025	15258	15146	15063	15165.4		13440	13879	13587	13991	14068	13793
877	19338	19809	19072	19355	19095	19333.8		19128	19214	19119	19760	19945	19433.2		19058	19476	19637	19945	19900	19603.2		18703	19124	18204	18575	17930	18507.2		16714	17286	15868	16187	16934	16597.8		15390	15078	15307	15193	15109	15215.4		13487	13924	13643	14043	14113	13842
878	19422	19884	19142	19407	19155	19402		19196	19271	19181	19840	20022	19502		19138	19564	19703	20011	19971	19677.4		18764	19182	18251	18652	18003	18570.4		16766	17346	15924	16240	16987	16652.6		15440	15126	15361	15239	15156	15264.4		13528	13959	13688	14087	14159	13884.2
879	19500	19955	19215	19494	19221	19477		19278	19351	19251	19914	20096	19578		19209	19626	19788	20077	20021	19744.2		18836	19256	18304	18725	18065	18637.2		16827	17409	15986	16293	17031	16709.2		15494	15179	15430	15289	15210	15320.4		13580	14010	13734	14138	14213	13935
880	19572	20034	19276	19567	19301	19550		19350	19430	19327	19983	20156	19649.2		19283	19694	19870	20167	20089	19820.6		18902	19318	18374	18779	18139	18702.4		16888	17474	16035	16364	17108	16773.8		15540	15235	15487	15341	15273	15375.2		13627	14051	13768	14193	14267	13981.2
881	19635	20108	19334	19622	19362	19612.2		19424	19488	19395	20054	20215	19715.2		19339	19760	19941	20229	20162	19886.2		18964	19389	18438	18852	18194	18767.4		16943	17540	16085	16414	17164	16829.2		15587	15305	15534	15389	15324	15427.8		13675	14098	13810	14246	14321	14030
882	19708	20192	19394	19687	19428	19681.8		19504	19563	19471	20112	20299	19789.8		19409	19835	20039	20306	20234	19964.6		19021	19467	18505	18928	18250	18834.2		16993	17598	16141	16477	17249	16891.6		15631	15350	15581	15435	15375	15474.4		13722	14146	13851	14285	14364	14073.6
883	19776	20285	19471	19753	19501	19757.2		19570	19632	19527	20175	20360	19852.8		19476	19925	20119	20370	20309	20039.8		19087	19531	18576	18995	18330	18903.8		17055	17658	16194	16533	17308	16949.6		15676	15413	15620	15500	15419	15525.6		13768	14201	13898	14340	14415	14124.4
884	19855	20366	19541	19815	19566	19828.6		19640	19705	19597	20260	20444	19929.2		19553	20004	20200	20433	20384	20114.8		19159	19601	18652	19066	18402	18976		17123	17732	16259	16581	17369	17012.8		15716	15465	15678	15546	15476	15576.2		13829	14247	13936	14394	14454	14172
885	19926	20438	19620	19886	19643	19902.6		19705	19785	19675	20314	20535	20002.8		19627	20070	20270	20510	20456	20186.6		19216	19669	18729	19128	18470	19042.4		17178	17786	16331	16624	17431	17070		15757	15518	15729	15589	15529	15624.4		13862	14292	13989	14435	14502	14216
886	19999	20529	19682	19969	19711	19978		19784	19866	19740	20399	20609	20079.6		19687	20136	20343	20570	20544	20256		19280	19745	18802	19197	18533	19111.4		17233	17851	16377	16683	17498	17128.4		15810	15574	15773	15641	15576	15674.8		13916	14331	14029	14476	14559	14262.2
887	20069	20599	19760	20056	19788	20054.4		19857	19937	19816	20480	20699	20157.8		19765	20207	20422	20651	20627	20334.4		19352	19819	18864	19256	18590	19176.2		17302	17910	16441	16745	17556	17190.8		15858	15628	15842	15707	15627	15732.4		13962	14384	14081	14517	14618	14312.4
888	20132	20691	19811	20140	19865	20127.8		19939	20010	19883	20560	20770	20232.4		19834	20280	20512	20728	20689	20408.6		19423	19877	18950	19331	18653	19246.8		17362	17992	16505	16801	17618	17255.6		15915	15692	15897	15769	15683	15791.2		13998	14431	14135	14564	14660	14357.6
889	20199	20786	19901	20220	19929	20207		20005	20084	19954	20632	20844	20303.8		19900	20344	20590	20796	20769	20479.8		19489	19961	19017	19392	18740	19319.8		17418	18059	16556	16857	17682	17314.4		15977	15753	15961	15834	15747	15854.4		14055	14479	14192	14616	14709	14410.2
890	20286	20850	19973	20290	19996	20279		20076	20167	20019	20723	20920	20381		19951	20408	20669	20868	20844	20548		19582	20041	19082	19472	18826	19400.6		17490	18144	16617	16928	17758	17387.4		16028	15799	16012	15883	15782	15900.8		14111	14532	14247	14653	14754	14459.4
891	20352	20934	20047	20358	20073	20352.8		20160	20240	20107	20783	20990	20456		20021	20487	20734	20963	20919	20624.8		19667	20132	19140	19543	18881	19472.6		17565	18205	16675	16992	17802	17447.8		16069	15851	16076	15939	15831	15953.2		14162	14578	14293	14695	14800	14505.6
892	20433	21018	20102	20424	20135	20422.4		20236	20314	20175	20872	21072	20533.8		20099	20567	20820	21038	20993	20703.4		19742	20198	19190	19595	18947	19534.4		17627	18269	16740	17073	17880	17517.8		16130	15910	16144	15999	15892	16015		14207	14618	14345	14750	14840	14552
893	20532	21111	20177	20492	20204	20503.2		20303	20362	20255	20940	21143	20600.6		20160	20652	20908	21104	21081	20781		19804	20274	19260	19668	19020	19605.2		17705	18308	16799	17145	17936	17578.6		16191	15962	16186	16056	15949	16068.8		14267	14669	14384	14792	14903	14603
894	20607	21186	20256	20559	20285	20578.6		20386	20450	20330	21021	21215	20680.4		20238	20727	20990	21171	21143	20853.8		19868	20333	19323	19734	19082	19668		17768	18369	16869	17199	17979	17636.8		16256	16023	16240	16114	16013	16129.2		14313	14721	14430	14845	14952	14652.2
895	20682	21274	20353	20638	20329	20655.2		20456	20523	20407	21096	21276	20751.6		20306	20816	21067	21254	21224	20933.4		19944	20400	19412	19796	19149	19740.2		17832	18438	16916	17261	18040	17697.4		16322	16077	16292	16161	16076	16185.6		14358	14774	14466	14901	15003	14700.4
896	20746	21355	20435	20699	20405	20728		20517	20598	20462	21154	21353	20816.8		20371	20894	21137	21340	21302	21008.8		20019	20482	19480	19866	19228	19815		17898	18500	16980	17330	18102	17762		16356	16136	16342	16205	16126	16233		14399	14831	14520	14957	15051	14751.6
897	20813	21423	20515	20772	20469	20798.4		20599	20678	20545	21237	21433	20898.4		20444	20977	21214	21416	21377	21085.6		20089	20560	19550	19947	19284	19886		17952	18561	17043	17402	18163	17824.2		16406	16181	16396	16245	16180	16281.6		14452	14885	14571	15010	15087	14801
898	20915	21499	20590	20840	20529	20874.6		20667	20746	20620	21329	21504	20973.2		20518	21055	21293	21489	21444	21159.8		20154	20626	19616	20027	19349	19954.4		18025	18620	17102	17464	18232	17888.6		16468	16232	16447	16295	16236	16335.6		14505	14939	14616	15061	15148	14853.8
899	20998	21587	20661	20905	20610	20952.2		20741	20822	20687	21419	21575	21048.8		20591	21137	21366	21563	21511	21233.6		20223	20704	19694	20103	19415	20027.8		18087	18682	17160	17529	18300	17951.6		16523	16294	16493	16357	16301	16393.6		14556	14989	14664	15105	15207	14904.2
900	21063	21666	20721	20976	20681	21021.4		20819	20893	20760	21494	21638	21120.8		20661	21208	21454	21642	21581	21309.2		20299	20770	19755	20179	19473	20095.2		18135	18756	17218	17596	18366	18014.2		16582	16352	16555	16415	16351	16451		14589	15030	14700	15151	15275	14949
901	21132	21748	20805	21054	20753	21098.4		20891	20975	20830	21578	21707	21196.2		20720	21292	21515	21719	21653	21379.8		20370	20845	19825	20263	19537	20168		18194	18824	17266	17648	18425	18071.4		16651	16413	16603	16462	16409	16507.6		14657	15090	14752	15218	15324	15008.2
902	21201	21823	20875	21151	20810	21172		20950	21061	20922	21651	21786	21274		20794	21356	21589	21800	21742	21456.2		20444	20918	19895	20342	19605	20240.8		18259	18897	17325	17701	18491	18134.6		16706	16479	16661	16514	16475	16567		14704	15138	14805	15257	15379	15056.6
903	21300	21917	20957	21238	20893	21261		21015	21144	20997	21727	21877	21352		20848	21431	21661	21884	21824	21529.6		20521	20989	19972	20405	19681	20313.6		18334	18952	17385	17770	18571	18202.4		16771	16535	16720	16563	16540	16625.8		14743	15203	14848	15314	15428	15107.2
904	21388	21991	21038	21306	20958	21336.2		21103	21228	21069	21815	21956	21434.2		20928	21518	21740	21969	21907	21612.4		20587	21056	20043	20480	19758	20384.8		18408	19010	17450	17835	18648	18270.2		16824	16599	16767	16609	16596	16679		14802	15250	14889	15371	15482	15158.8
905	21471	22069	21102	21385	21032	21411.8		21174	21299	21138	21896	22034	21508.2		21002	21575	21808	22044	21972	21680.2		20655	21124	20114	20546	19832	20454.2		18473	19094	17506	17899	18717	18337.8		16876	16654	16835	16654	16647	16733.2		14842	15294	14934	15413	15538	15204.2
906	21552	22144	21192	21452	21109	21489.8		21260	21367	21203	21974	22109	21582.6		21087	21661	21888	22147	22061	21768.8		20726	21194	20187	20630	19902	20527.8		18535	19176	17594	17970	18778	18410.6		16965	16720	16889	16713	16707	16798.8		14894	15346	14986	15469	15595	15258
907	21607	22229	21267	21522	21182	21561.4		21340	21456	21279	22045	22201	21664.2		21158	21723	21976	22225	22163	21849		20808	21235	20262	20715	19962	20596.4		18613	19249	17641	18035	18839	18475.4		17021	16797	16941	16779	16768	16861.2		14931	15398	15029	15515	15654	15305.4
908	21693	22320	21344	21613	21245	21643		21434	21537	21350	22123	22276	21744		21217	21798	22045	22308	22254	21924.4		20884	21304	20328	20793	20040	20669.8		18679	19325	17707	18100	18909	18544		17094	16844	16996	16844	16821	16919.8		14982	15449	15088	15559	15695	15354.6
909	21763	22404	21428	21705	21327	21725.4		21515	21609	21419	22194	22341	21815.6		21282	21867	22127	22390	22333	21999.8		20974	21373	20403	20862	20103	20743		18746	19399	17767	18164	18987	18612.6		17163	16890	17051	16898	16875	16975.4		15029	15513	15135	15611	15738	15405.2
910	21842	22482	21505	21791	21417	21807.4		21596	21691	21496	22264	22437	21896.8		21359	21940	22216	22458	22398	22074.2		21040	21450	20476	20924	20193	20816.6		18817	19471	17823	18224	19060	18679		17215	16942	17110	16956	16925	17029.6		15079	15562	15185	15665	15788	15455.8
911	21902	22574	21591	21874	21503	21888.8		21653	21767	21583	22338	22498	21967.8		21421	22017	22298	22552	22459	22149.4		21107	21519	20543	20988	20267	20884.8		18884	19536	17893	18293	19127	18746.6		17277	17001	17174	17001	16969	17084.4		15123	15595	15232	15719	15845	15502.8
912	21984	22656	21663	21939	21583	21965		21724	21859	21662	22422	22584	22050.2		21490	22105	22382	22633	22538	22229.6		21168	21597	20622	21076	20328	20958.2		18948	19609	17951	18356	19180	18808.8		17334	17052	17233	17056	17026	17140.2		15163	15659	15292	15775	15878	15553.4
913	22073	22745	21736	22020	21651	22045		21814	21931	21736	22520	22671	22134.4		21553	22176	22452	22710	22606	22299.4		21253	21667	20684	21139	20390	21026.6		19006	19662	18012	18422	19217	18863.8		17400	17105	17307	17114	17090	17203.2		15210	15711	15338	15822	15928	15601.8
914	22153	22833	21833	22107	21733	22131.8		21888	22025	21787	22600	22739	22207.8		21635	22268	22522	22790	22674	22377.8		21331	21732	20745	21208	20473	21097.8		19072	19729	18058	18482	19292	18926.6		17474	17148	17369	17180	17159	17266		15246	15760	15386	15880	15982	15650.8
915	22219	22931	21916	22195	21807	22213.6		21966	22098	21863	22700	22817	22288.8		21713	22355	22609	22858	22769	22460.8		21401	21814	20829	21288	20552	21176.8		19128	19794	18118	18550	19375	18993		17520	17205	17429	17248	17220	17324.4		15297	15822	15433	15951	16034	15707.4
916	22296	23008	21990	22271	21896	22292.2		22019	22162	21939	22784	22918	22364.4		21790	22433	22704	22933	22847	22541.4		21463	21886	20899	21346	20628	21244.4		19190	19855	18167	18618	19437	19053.4		17585	17264	17478	17302	17282	17382.2		15343	15876	15481	16002	16100	15760.4
917	22377	23100	22070	22354	21977	22375.6		22088	22245	22020	22864	23007	22444.8		21867	22506	22796	23021	22935	22625		21536	21955	20971	21426	20689	21315.4		19259	19923	18229	18670	19501	19116.4		17652	17320	17537	17352	17347	17441.6		15388	15925	15539	16055	16147	15810.8
918	22453	23182	22154	22460	22059	22461.6		22180	22319	22097	22951	23107	22530.8		21940	22588	22862	23106	23009	22701		21594	22023	21044	21509	20756	21385.2		19327	19986	18304	18745	19590	19190.4		17712	17379	17586	17396	17402	17495		15437	15975	15590	16107	16214	15864.6
919	22517	23282	22234	22545	22130	22541.6		22257	22401	22170	23036	23183	22609.4		22023	22674	22938	23189	23084	22781.6		21682	22100	21117	21563	20819	21456.2		19383	20063	18360	18808	19667	19256.2		17770	17425	17636	17459	17464	17550.8		15480	16044	15646	16161	16266	15919.4
920	22613	23371	22312	22626	22218	22628		22316	22481	22264	23126	23268	22691		22081	22769	23023	23263	23152	22857.6		21771	22172	21205	21655	20895	21539.6		19455	20137	18415	18865	19747	19323.8		17831	17493	17706	17512	17545	17617.4		15527	16097	15709	16224	16311	15973.6
921	22701	23462	22390	22719	22299	22714.2		22406	22569	22328	23198	23347	22769.6		22142	22852	23099	23358	23238	22937.8		21848	22248	21263	21738	20969	21613.2		19530	20201	18482	18938	19823	19394.8		17890	17554	17758	17565	17597	17672.8		15573	16157	15762	16285	16370	16029.4
922	22792	23560	22456	22797	22366	22794.2		22486	22637	22395	23294	23443	22851		22226	22919	23186	23441	23336	23021.6		21925	22336	21344	21818	21037	21692		19599	20267	18552	19017	19888	19464.6		17955	17621	17814	17622	17648	17732		15638	16215	15815	16344	16419	16086.2
923	22888	23628	22527	22892	22443	22875.6		22570	22723	22481	23379	23536	22937.8		22294	22991	23265	23537	23417	23100.8		22004	22411	21418	21914	21097	21768.8		19668	20334	18624	19088	19949	19532.6		18011	17687	17880	17680	17703	17792.2		15700	16267	15876	16408	16478	16145.8
924	22990	23716	22611	22984	22512	22962.6		22650	22805	22560	23465	23617	23019.4		22381	23086	23347	23628	23510	23190.4		22076	22490	21497	22007	21174	21848.8		19744	20400	18708	19168	20009	19605.8		18064	17745	17951	17744	17764	17853.6		15756	16322	15933	16455	16545	16202.2
925	23086	23802	22706	23085	22586	23053		22721	22880	22639	23536	23701	23095.4		22448	23166	23427	23701	23597	23267.8		22165	22574	21561	22090	21246	21927.2		19802	20464	18773	19239	20092	19674		18123	17824	18029	17811	17822	17921.8		15811	16367	15978	16506	16599	16252.2
926	23174	23888	22783	23163	22666	23134.8		22793	22955	22718	23626	23786	23175.6		22526	23256	23503	23766	23672	23344.6		22241	22641	21643	22148	21318	21998.2		19876	20529	18839	19300	20163	19741.4		18193	17878	18107	17876	17878	17986.4		15877	16414	16031	16573	16664	16311.8
927	23264	23971	22878	23241	22743	23219.4		22857	23031	22802	23711	23864	23253		22597	23349	23588	23843	23756	23426.6		22311	22717	21725	22228	21401	22076.4		19947	20589	18904	19361	20247	19809.6		18249	17936	18176	17926	17954	18048.2		15929	16472	16091	16631	16719	16368.4
928	23349	24062	22968	23318	22823	23304		22936	23117	22885	23812	23951	23340.2		22671	23428	23663	23922	23855	23507.8		22382	22799	21813	22300	21490	22156.8		20021	20659	18954	19432	20316	19876.4		18323	18007	18244	17980	18015	18113.8		15972	16532	16146	16695	16764	16421.8
929	23439	24146	23064	23405	22897	23390.2		23026	23197	22967	23916	24035	23428.2		22726	23527	23734	24002	23932	23584.2		22459	22859	21898	22366	21577	22231.8		20083	20748	19012	19507	20400	19950		18383	18069	18322	18059	18085	18183.6		16021	16599	16203	16757	16821	16480.2
930	23515	24239	23151	23485	22989	23475.8		23098	23278	23064	23975	24125	23508		22810	23587	23822	24099	24019	23667.4		22548	22958	21964	22459	21652	22316.2		20167	20814	19086	19572	20470	20021.8		18448	18135	18387	18120	18140	18246		16084	16650	16253	16792	16876	16531
931	23604	24328	23220	23575	23095	23564.4		23170	23363	23136	24078	24214	23592.2		22889	23670	23897	24190	24103	23749.8		22618	23042	22049	22547	21735	22398.2		20247	20875	19152	19643	20551	20093.6		18504	18192	18466	18174	18192	18305.6		16139	16702	16301	16847	16938	16585.4
932	23683	24422	23308	23663	23155	23646.2		23251	23452	23209	24173	24302	23677.4		22967	23743	23985	24275	24167	23827.4		22696	23119	22131	22630	21814	22478		20311	20961	19220	19686	20613	20158.2		18558	18268	18542	18247	18271	18377.2		16193	16754	16352	16904	16999	16640.4
933	23758	24494	23407	23745	23248	23730.4		23321	23528	23290	24258	24377	23754.8		23049	23812	24089	24346	24245	23908.2		22772	23205	22203	22716	21892	22557.6		20365	21038	19275	19742	20656	20215.2		18622	18336	18605	18316	18327	18441.2		16244	16810	16413	16948	17056	16694.2
934	23835	24580	23499	23822	23305	23808.2		23390	23607	23374	24348	24454	23834.6		23128	23906	24167	24423	24322	23989.2		22861	23300	22282	22787	21970	22640		20428	21111	19335	19807	20734	20283		18698	18395	18679	18405	18393	18514		16311	16865	16483	17009	17106	16754.8
935	23923	24635	23620	23905	23408	23898.2		23457	23684	23464	24438	24544	23917.4		23203	23971	24230	24513	24417	24066.8		22925	23376	22359	22875	22034	22713.8		20499	21170	19405	19864	20807	20349		18774	18465	18760	18467	18463	18585.8		16372	16912	16544	17067	17156	16810.2
936	23995	24719	23709	23998	23478	23979.8		23543	23775	23537	24542	24638	24007		23279	24047	24314	24596	24489	24145		23003	23463	22434	22949	22109	22791.6		20571	21237	19466	19938	20882	20418.8		18843	18530	18846	18527	18530	18655.2		16420	16952	16597	17120	17203	16858.4
937	24080	24813	23790	24086	23546	24063		23607	23874	23611	24614	24720	24085.2		23333	24130	24406	24676	24568	24222.6		23094	23543	22528	23030	22190	22877		20651	21310	19534	20000	20957	20490.4		18914	18583	18919	18604	18582	18720.4		16478	17029	16642	17178	17250	16915.4
938	24158	24908	23881	24168	23607	24144.4		23682	23956	23684	24721	24814	24171.4		23411	24209	24482	24768	24664	24306.8		23187	23632	22603	23106	22272	22960		20719	21389	19593	20078	21033	20562.4		18982	18638	18986	18653	18654	18782.6		16529	17087	16703	17243	17309	16974.2
939	24249	25014	23978	24260	23699	24240		23766	24033	23794	24809	24914	24263.2		23503	24303	24560	24875	24745	24397.2		23269	23724	22696	23198	22342	23045.8		20795	21458	19673	20149	21091	20633.2		19045	18692	19051	18718	18720	18845.2		16589	17152	16776	17293	17368	17035.6
940	24332	25094	24077	24382	23778	24332.6		23856	24118	23867	24903	25006	24350		23583	24388	24646	24960	24836	24482.6		23356	23787	22779	23278	22420	23124		20861	21524	19740	20212	21180	20703.4		19105	18761	19118	18791	18781	18911.2		16642	17208	16831	17357	17439	17095.4
941	24417	25203	24159	24469	23867	24423		23928	24196	23956	24997	25075	24430.4		23674	24474	24723	25032	24932	24567		23439	23879	22878	23358	22488	23208.4		20933	21612	19817	20284	21265	20782.2		19176	18838	19187	18861	18843	18981		16685	17284	16887	17422	17497	17155
942	24505	25297	24251	24570	23954	24515.4		24007	24291	24039	25082	25170	24517.8		23750	24560	24808	25142	25017	24655.4		23512	23965	22961	23435	22569	23288.4		21021	21699	19886	20359	21322	20857.4		19246	18895	19258	18935	18904	19047.6		16751	17341	16942	17495	17551	17216
943	24565	25384	24344	24652	24051	24599.2		24082	24366	24148	25188	25262	24609.2		23825	24648	24888	25228	25107	24739.2		23598	24049	23040	23516	22636	23367.8		21086	21775	19953	20418	21389	20924.2		19316	18962	19314	19008	18970	19114		16791	17394	17007	17555	17608	17271
944	24665	25476	24426	24732	24149	24689.6		24166	24488	24228	25293	25349	24704.8		23909	24744	24995	25317	25199	24832.8		23690	24158	23100	23598	22704	23450		21159	21857	20036	20496	21456	21000.8		19379	19023	19374	19062	19040	19175.6		16848	17453	17057	17618	17681	17331.4
945	24766	25572	24507	24836	24247	24785.6		24233	24583	24321	25385	25422	24788.8		23983	24814	25067	25410	25279	24910.6		23766	24257	23176	23673	22793	23533		21237	21930	20104	20559	21520	21070		19455	19066	19449	19126	19104	19240		16903	17514	17109	17687	17747	17392
946	24859	25660	24586	24930	24347	24876.4		24318	24675	24412	25468	25518	24878.2		24081	24907	25139	25504	25373	25000.8		23841	24343	23247	23755	22849	23607		21305	22009	20181	20632	21594	21144.2		19515	19130	19522	19204	19172	19308.6		16955	17570	17161	17743	17817	17449.2
947	24952	25768	24673	25024	24440	24971.4		24412	24758	24513	25562	25613	24971.6		24171	25004	25219	25595	25465	25090.8		23917	24423	23355	23842	22919	23691.2		21407	22084	20248	20697	21674	21222		19575	19202	19588	19261	19247	19374.6		17004	17625	17221	17807	17879	17507.2
948	25028	25865	24768	25137	24522	25064		24501	24864	24593	25637	25695	25058		24252	25102	25310	25671	25547	25176.4		24027	24504	23430	23929	22990	23776		21472	22173	20328	20757	21733	21292.6		19626	19266	19655	19320	19311	19435.6		17063	17691	17279	17874	17939	17569.2
949	25124	25954	24845	25223	24603	25149.8		24584	24962	24685	25722	25791	25148.8		24331	25190	25403	25748	25634	25261.2		24100	24607	23521	24010	23065	23860.6		21567	22255	20396	20838	21809	21373		19688	19331	19721	19385	19384	19501.8		17124	17745	17341	17928	18003	17628.2
950	25213	26066	24949	25318	24690	25247.2		24660	25046	24777	25801	25898	25236.4		24413	25276	25497	25830	25718	25346.8		24192	24682	23597	24087	23158	23943.2		21635	22329	20459	20900	21877	21440		19745	19388	19794	19454	19443	19564.8		17185	17803	17388	17981	18073	17686
951	25306	26154	25047	25422	24800	25345.8		24766	25135	24876	25888	25992	25331.4		24516	25369	25564	25905	25801	25431		24295	24766	23678	24161	23234	24026.8		21727	22392	20520	20974	21938	21510.2		19816	19452	19863	19532	19501	19632.8		17239	17855	17445	18043	18129	17742.2
952	25400	26239	25150	25504	24890	25436.6		24866	25225	24960	25967	26090	25421.6		24594	25446	25641	26010	25902	25518.6		24374	24868	23748	24245	23315	24110		21810	22467	20604	21053	22016	21590		19900	19544	19910	19624	19562	19708		17283	17912	17496	18110	18199	17800
953	25488	26347	25256	25601	24978	25534		24941	25315	25046	26061	26181	25508.8		24681	25528	25720	26107	25993	25605.8		24457	24955	23838	24329	23377	24191.2		21900	22523	20677	21136	22087	21664.6		19964	19602	19972	19699	19625	19772.4		17353	17971	17540	18177	18263	17860.8
954	25585	26448	25345	25695	25091	25632.8		25025	25419	25127	26158	26287	25603.2		24766	25627	25822	26194	26077	25697.2		24547	25027	23917	24423	23463	24275.4		21967	22603	20756	21215	22166	21741.4		20046	19668	20040	19761	19705	19844		17412	18032	17586	18225	18318	17914.6
955	25677	26559	25448	25793	25186	25732.6		25115	25504	25222	26273	26368	25696.4		24854	25721	25899	26295	26176	25789		24634	25121	24007	24510	23540	24362.4		22040	22683	20836	21287	22246	21818.4		20118	19748	20103	19835	19774	19915.6		17471	18100	17638	18279	18391	17975.8
956	25780	26646	25539	25904	25305	25834.8		25190	25607	25299	26391	26473	25792		24947	25821	25998	26389	26258	25882.6		24719	25203	24086	24602	23623	24446.6		22120	22753	20911	21350	22304	21887.6		20169	19802	20170	19911	19854	19981.2		17529	18147	17699	18334	18461	18034
957	25875	26745	25642	25989	25392	25928.6		25297	25707	25378	26477	26553	25882.4		25047	25912	26091	26502	26358	25982		24810	25297	24163	24688	23723	24536.2		22191	22816	20966	21418	22374	21953		20238	19865	20253	19976	19915	20049.4		17578	18209	17765	18384	18521	18091.4
958	25974	26856	25734	26090	25479	26026.6		25377	25799	25466	26569	26649	25972		25143	26002	26180	26570	26452	26069.4		24888	25379	24247	24780	23800	24618.8		22271	22904	21022	21501	22456	22030.8		20298	19937	20316	20044	19984	20115.8		17642	18268	17844	18455	18593	18160.4
959	26054	26954	25812	26173	25570	26112.6		25479	25885	25561	26667	26735	26065.4		25232	26100	26272	26657	26538	26159.8		24971	25446	24337	24847	23877	24695.6		22345	22969	21102	21594	22540	22110		20365	20012	20402	20107	20043	20185.8		17697	18312	17911	18511	18661	18218.4
960	26155	27059	25910	26263	25666	26210.6		25572	25978	25645	26777	26815	26157.4		25301	26204	26369	26753	26641	26253.6		25048	25542	24429	24939	23968	24785.2		22413	23036	21164	21673	22600	22177.2		20454	20072	20480	20182	20118	20261.2		17748	18376	17967	18572	18715	18275.6
961	26257	27142	26016	26355	25768	26307.6		25680	26072	25744	26869	26915	26256		25390	26288	26456	26838	26749	26344.2		25124	25632	24509	25012	24054	24866.2		22484	23103	21253	21759	22681	22256		20515	20153	20562	20245	20186	20332.2		17798	18439	18035	18617	18783	18334.4
962	26353	27235	26132	26466	25886	26414.4		25775	26164	25841	26997	27011	26357.6		25476	26368	26542	26934	26837	26431.4		25209	25726	24585	25111	24155	24957.2		22558	23171	21309	21840	22757	22327		20583	20227	20642	20323	20241	20403.2		17853	18502	18107	18696	18866	18404.8
963	26450	27332	26221	26553	25988	26508.8		25873	26249	25931	27106	27092	26450.2		25567	26457	26636	27019	26935	26522.8		25300	25805	24681	25192	24238	25043.2		22628	23245	21392	21922	22832	22403.8		20646	20307	20706	20389	20296	20468.8		17912	18578	18158	18754	18915	18463.4
964	26545	27436	26325	26656	26091	26610.6		25982	26337	26037	27213	27193	26552.4		25664	26558	26740	27117	27048	26625.4		25373	25902	24767	25277	24318	25127.4		22714	23324	21460	22001	22917	22483.2		20711	20380	20766	20444	20358	20531.8		17963	18639	18218	18820	18969	18521.8
965	26640	27536	26429	26750	26205	26712		26065	26413	26134	27309	27291	26642.4		25749	26646	26831	27211	27148	26717		25472	25992	24862	25377	24407	25222		22787	23398	21533	22069	22989	22555.2		20802	20451	20838	20508	20421	20604		18027	18700	18280	18885	19046	18587.6
966	26738	27633	26523	26864	26313	26814.2		26172	26514	26217	27407	27389	26739.8		25832	26741	26932	27294	27259	26811.6		25568	26107	24948	25482	24480	25317		22867	23466	21614	22165	23076	22637.6		20873	20517	20924	20587	20476	20675.4		18081	18757	18342	18958	19131	18653.8
967	26834	27718	26615	26962	26407	26907.2		26273	26599	26301	27502	27492	26833.4		25929	26853	27018	27385	27364	26909.8		25669	26207	25037	25561	24587	25412.2		22937	23550	21674	22253	23151	22713		20945	20590	21005	20648	20533	20744.2		18151	18831	18402	19029	19206	18723.8
968	26933	27818	26730	27067	26507	27011		26366	26700	26402	27581	27595	26928.8		26018	26948	27125	27483	27461	27007		25754	26299	25132	25642	24665	25498.4		23013	23632	21759	22318	23239	22792.2		21020	20666	21075	20726	20606	20818.6		18204	18900	18476	19090	19262	18786.4
969	27034	27936	26823	27186	26604	27116.6		26459	26799	26506	27672	27689	27025		26086	27043	27222	27576	27559	27097.2		25842	26372	25215	25736	24735	25580		23103	23704	21832	22394	23318	22870.2		21069	20738	21142	20802	20684	20887		18282	18957	18536	19145	19324	18848.8
970	27134	28042	26921	27308	26696	27220.2		26545	26879	26600	27765	27783	27114.4		26197	27151	27326	27677	27655	27201.2		25944	26460	25299	25816	24818	25667.4		23175	23772	21908	22467	23385	22941.4		21135	20793	21222	20882	20763	20959		18347	19024	18597	19210	19394	18914.4
971	27221	28169	27015	27418	26784	27321.4		26652	26982	26700	27882	27878	27218.8		26290	27237	27446	27772	27737	27296.4		26045	26545	25384	25902	24904	25756		23243	23860	21966	22548	23483	23020		21195	20856	21291	20958	20824	21024.8		18399	19085	18668	19286	19475	18982.6
972	27328	28272	27102	27512	26878	27418.4		26758	27094	26810	27986	27967	27323		26384	27315	27536	27863	27828	27385.2		26123	26631	25475	26004	24986	25843.8		23325	23949	22038	22622	23558	23098.4		21260	20919	21354	21028	20889	21090		18462	19139	18729	19369	19538	19047.4
973	27419	28366	27197	27609	26964	27511		26861	27194	26899	28076	28052	27416.4		26480	27420	27613	27952	27921	27477.2		26226	26754	25545	26101	25069	25939		23412	24027	22114	22695	23636	23176.8		21343	20987	21449	21089	20965	21166.6		18530	19216	18790	19420	19597	19110.6
974	27526	28477	27304	27719	27058	27616.8		26953	27307	26994	28189	28146	27517.8		26577	27512	27695	28056	28018	27571.6		26309	26840	25623	26189	25159	26024		23478	24119	22187	22797	23731	23262.4		21420	21052	21528	21163	21047	21242		18603	19282	18869	19486	19653	19178.6
975	27623	28594	27402	27828	27172	27723.8		27054	27403	27088	28286	28249	27616		26671	27604	27789	28160	28122	27669.2		26388	26934	25717	26289	25240	26113.6		23573	24199	22253	22881	23815	23344.2		21478	21133	21598	21226	21130	21313		18662	19346	18948	19541	19713	19242
976	27715	28717	27518	27938	27262	27830		27142	27495	27189	28397	28353	27715.2		26759	27680	27862	28255	28222	27755.6		26486	27034	25821	26368	25334	26208.6		23639	24278	22324	22954	23912	23421.4		21558	21199	21667	21294	21207	21385		18724	19413	19025	19608	19785	19311
977	27820	28819	27612	28038	27388	27935.4		27234	27587	27283	28499	28443	27809.2		26850	27768	27958	28349	28331	27851.2		26572	27126	25908	26452	25420	26295.6		23707	24360	22399	23024	24009	23499.8		21624	21252	21737	21369	21295	21455.4		18788	19474	19088	19670	19867	19377.4
978	27934	28922	27713	28147	27489	28041		27329	27675	27364	28593	28536	27899.4		26968	27886	28074	28436	28443	27961.4		26662	27232	26017	26549	25520	26396		23801	24450	22480	23107	24085	23584.6		21709	21317	21807	21445	21373	21530.2		18862	19534	19165	19719	19936	19443.2
979	28044	29019	27825	28257	27579	28144.8		27431	27792	27461	28689	28647	28004		27059	27979	28169	28532	28531	28054		26762	27312	26130	26635	25608	26489.4		23903	24543	22550	23191	24181	23673.6		21797	21391	21898	21510	21453	21609.8		18934	19607	19221	19782	20005	19509.8
980	28138	29137	27928	28380	27693	28255.2		27541	27896	27570	28784	28752	28108.6		27163	28084	28257	28636	28616	28151.2		26869	27403	26211	26719	25698	26580		23988	24626	22626	23264	24267	23754.2		21859	21480	21987	21573	21521	21684		18993	19677	19292	19835	20076	19574.6
981	28233	29240	28029	28510	27802	28362.8		27644	27991	27667	28895	28857	28210.8		27253	28192	28373	28742	28719	28255.8		26984	27497	26285	26811	25769	26669.2		24064	24715	22707	23340	24341	23833.4		21947	21539	22079	21649	21614	21765.6		19059	19748	19348	19894	20141	19638
982	28345	29356	28127	28629	27906	28472.6		27750	28095	27764	29031	28940	28316		27328	28284	28483	28847	28823	28353		27074	27581	26369	26906	25844	26754.8		24164	24809	22782	23419	24418	23918.4		22018	21611	22150	21738	21687	21840.8		19128	19824	19415	19963	20212	19708.4
983	28461	29463	28248	28742	28016	28586		27880	28183	27886	29143	29044	28427.2		27433	28388	28584	28960	28922	28457.4		27170	27688	26477	26980	25921	26847.2		24231	24890	22891	23502	24500	24002.8		22103	21682	22222	21809	21769	21917		19182	19883	19455	20024	20294	19767.6
984	28572	29584	28347	28859	28132	28698.8		27989	28271	27978	29235	29150	28524.6		27534	28482	28691	29075	29013	28559		27253	27778	26567	27091	26021	26942		24301	24973	22988	23572	24589	24084.6		22173	21757	22308	21876	21836	21990		19225	19957	19517	20099	20351	19829.8
985	28698	29679	28447	28961	28239	28804.8		28097	28377	28067	29316	29256	28622.6		27628	28585	28787	29179	29120	28659.8		27379	27881	26659	27204	26113	27047.2		24397	25054	23067	23667	24658	24168.6		22250	21851	22391	21943	21905	22068		19285	20019	19584	20160	20425	19894.6
986	28791	29792	28550	29069	28339	28908.2		28213	28477	28165	29431	29361	28729.4		27731	28706	28924	29291	29212	28772.8		27480	27982	26749	27316	26200	27145.4		24467	25154	23149	23739	24737	24249.2		22309	21931	22460	22020	21966	22137.2		19347	20096	19663	20222	20478	19961.2
987	28901	29903	28669	29195	28430	29019.6		28313	28596	28258	29538	29449	28830.8		27854	28802	29029	29396	29332	28882.6		27571	28095	26834	27420	26297	27243.4		24553	25220	23234	23834	24814	24331		22392	22003	22540	22092	22041	22213.6		19405	20167	19733	20299	20545	20029.8
988	29002	30005	28762	29309	28533	29122.2		28416	28695	28375	29649	29553	28937.6		27961	28915	29127	29519	29427	28989.8		27658	28192	26947	27509	26393	27339.8		24635	25324	23312	23925	24899	24419		22484	22081	22599	22178	22120	22292.4		19457	20242	19802	20361	20614	20095.2
989	29113	30095	28880	29414	28646	29229.6		28520	28794	28454	29739	29659	29033.2		28086	29023	29224	29617	29525	29095		27746	28301	27040	27614	26494	27439		24728	25404	23383	24001	24987	24500.6		22576	22163	22667	22246	22188	22368		19533	20303	19872	20435	20691	20166.8
990	29204	30209	28997	29521	28748	29335.8		28619	28892	28555	29844	29779	29137.8		28183	29152	29334	29727	29631	29205.4		27878	28390	27114	27698	26588	27533.6		24813	25484	23467	24086	25065	24583		22660	22272	22750	22342	22267	22458.2		19595	20392	19934	20498	20735	20230.8
991	29290	30309	29098	29646	28850	29438.6		28712	28991	28655	29956	29879	29238.6		28280	29243	29448	29856	29730	29311.4		27974	28501	27207	27798	26699	27635.8		24903	25565	23563	24166	25158	24671		22733	22352	22818	22430	22329	22532.4		19659	20472	20003	20561	20803	20299.6
992	29411	30421	29211	29747	28944	29546.8		28814	29098	28754	30058	29984	29341.6		28379	29359	29559	29965	29839	29420.2		28073	28622	27320	27900	26786	27740.2		24982	25663	23633	24249	25239	24753.2		22793	22417	22901	22505	22414	22606		19722	20520	20079	20634	20870	20365
993	29523	30580	29309	29860	29073	29669		28934	29202	28861	30166	30098	29452.2		28505	29476	29668	30068	29943	29532		28166	28721	27424	27991	26889	27838.2		25057	25751	23719	24340	25318	24837		22867	22494	22976	22581	22509	22685.4		19784	20589	20145	20695	20942	20431
994	29647	30676	29415	29952	29200	29778		29046	29317	28988	30275	30214	29568		28609	29577	29762	30194	30040	29636.4		28287	28814	27529	28079	26983	27938.4		25150	25850	23808	24423	25416	24929.4		22931	22571	23050	22648	22581	22756.2		19848	20656	20212	20769	21002	20497.4
995	29773	30776	29525	30071	29303	29889.6		29153	29416	29077	30372	30316	29666.8		28721	29692	29870	30317	30138	29747.6		28400	28900	27619	28171	27058	28029.6		25229	25947	23883	24498	25505	25012.4		23015	22658	23129	22724	22664	22838		19940	20731	20279	20845	21079	20574.8
996	29885	30889	29644	30182	29414	30002.8		29259	29535	29179	30473	30431	29775.4		28841	29799	29969	30396	30245	29850		28482	28992	27721	28271	27145	28122.2		25314	26055	23960	24585	25617	25106.2		23093	22740	23207	22796	22754	22918		20011	20790	20343	20901	21157	20640.4
997	29991	31008	29763	30292	29523	30115.4		29376	29637	29286	30579	30533	29882.2		28945	29904	30075	30505	30369	29959.6		28591	29072	27823	28377	27249	28222.4		25416	26152	24051	24676	25697	25198.4		23182	22808	23290	22884	22824	22997.6		20079	20862	20396	20972	21230	20707.8
998	30121	31128	29890	30411	29618	30233.6		29478	29768	29402	30691	30663	30000.4		29069	30000	30205	30625	30476	30075		28686	29170	27918	28489	27350	28322.6		25504	26247	24141	24776	25804	25294.4		23259	22898	23381	22974	22911	23084.6		20150	20930	20446	21038	21300	20772.8
999	30231	31226	30027	30522	29746	30350.4		29587	29887	29497	30783	30799	30110.6		29180	30126	30306	30740	30586	30187.6		28787	29268	28017	28594	27465	28426.2		25611	26336	24215	24858	25886	25381.2		23331	22965	23477	23052	23006	23166.2		20222	21015	20510	21107	21383	20847.4
1000	30351	31331	30135	30642	29873	30466.4		29686	30012	29612	30897	30913	30224		29289	30226	30423	30861	30694	30298.6		28888	29392	28114	28707	27570	28534.2		25670	26429	24295	24935	25975	25460.8		23419	23039	23563	23143	23079	23248.6		20306	21091	20577	21182	21449	20921
1001	30454	31439	30239	30765	29988	30577		29808	30121	29709	31008	31022	30333.6		29396	30333	30525	30982	30805	30408.2		28998	29494	28234	28802	27670	28639.6		25765	26505	24382	25023	26066	25548.2		23489	23102	23647	23220	23161	23323.8		20369	21152	20645	21240	21529	20987
1002	30571	31550	30358	30872	30113	30692.8		29925	30226	29817	31096	31150	30442.8		29512	30438	30633	31088	30930	30520.2		29098	29597	28336	28901	27771	28740.6		25853	26596	24472	25114	26151	25637.2		23577	23180	23749	23305	23262	23414.6		20450	21233	20705	21302	21588	21055.6
1003	30666	31655	30476	30986	30202	30797		30040	30330	29912	31191	31268	30548.2		29627	30562	30722	31236	31032	30635.8		29196	29695	28434	29001	27870	28839.2		25946	26704	24560	25183	26217	25722		23654	23243	23832	23367	23356	23490.4		20542	21317	20764	21365	21648	21127.2
1004	30795	31752	30583	31107	30316	30910.6		30171	30439	30014	31302	31382	30661.6		29729	30672	30824	31365	31142	30746.4		29320	29836	28532	29118	27981	28957.4		26039	26800	24639	25262	26310	25810		23750	23318	23910	23457	23425	23572		20601	21394	20840	21436	21717	21197.6
1005	30900	31858	30712	31218	30446	31026.8		30281	30542	30120	31408	31486	30767.4		29835	30773	30959	31499	31257	30864.6		29418	29918	28630	29230	28075	29054.2		26123	26882	24721	25337	26410	25894.6		23838	23421	23992	23546	23518	23663		20656	21462	20921	21495	21783	21263.4
1006	31017	31967	30825	31331	30558	31139.6		30392	30672	30219	31526	31602	30882.2		29955	30896	31075	31625	31365	30983.2		29540	30024	28746	29334	28176	29164		26215	26974	24819	25431	26495	25986.8		23924	23497	24067	23614	23593	23739		20714	21537	20994	21558	21869	21334.4
1007	31119	32085	30939	31428	30658	31245.8		30510	30789	30328	31640	31722	30997.8		30066	31003	31186	31724	31478	31091.4		29642	30121	28850	29435	28266	29262.8		26296	27081	24909	25525	26603	26082.8		24005	23569	24144	23698	23663	23815.8		20777	21606	21062	21635	21942	21404.4
1008	31232	32203	31041	31545	30768	31357.8		30631	30909	30441	31757	31829	31113.4		30196	31112	31307	31854	31571	31208		29744	30219	28956	29545	28362	29365.2		26405	27183	24989	25608	26684	26173.8		24082	23665	24225	23787	23747	23901.2		20832	21682	21135	21717	22013	21475.8
1009	31333	32338	31156	31657	30883	31473.4		30754	31029	30557	31889	31941	31234		30304	31218	31425	31974	31671	31318.4		29860	30336	29076	29662	28459	29478.6		26496	27270	25077	25711	26787	26268.2		24170	23733	24299	23860	23827	23977.8		20882	21756	21202	21789	22092	21544.2
1010	31459	32477	31272	31791	31006	31601		30866	31139	30658	32005	32064	31346.4		30418	31332	31534	32096	31772	31430.4		29971	30483	29173	29780	28575	29596.4		26596	27352	25145	25840	26882	26363		24264	23812	24379	23949	23919	24064.6		20947	21837	21276	21859	22161	21616
1011	31571	32586	31388	31903	31127	31715		30966	31254	30788	32115	32176	31459.8		30517	31458	31663	32201	31875	31542.8		30093	30604	29286	29888	28685	29711.2		26711	27451	25253	25911	26979	26461		24345	23905	24447	24039	24003	24147.8		21007	21922	21348	21940	22222	21687.8
1012	31695	32721	31486	32017	31239	31831.6		31105	31373	30896	32228	32277	31575.8		30635	31564	31799	32314	31994	31661.2		30200	30717	29383	29993	28804	29819.4		26790	27543	25328	26007	27086	26550.8		24458	23988	24522	24123	24087	24235.6		21068	22004	21422	22017	22278	21757.8
1013	31812	32820	31606	32116	31358	31942.4		31225	31482	31009	32356	32405	31695.4		30749	31701	31914	32442	32095	31780.2		30308	30830	29480	30090	28888	29919.2		26890	27647	25421	26095	27179	26646.4		24523	24065	24606	24206	24167	24313.4		21133	22062	21499	22095	22348	21827.4
1014	31935	32941	31718	32249	31457	32060		31353	31580	31120	32469	32518	31808		30867	31821	32049	32565	32223	31905		30422	30949	29564	30209	28973	30023.4		26984	27739	25524	26184	27260	26738.2		24625	24134	24699	24289	24237	24396.8		21217	22136	21593	22157	22410	21902.6
1015	32075	33053	31834	32379	31596	32187.4		31449	31714	31236	32586	32656	31928.2		30976	31957	32175	32705	32344	32031.4		30546	31049	29673	30311	29073	30130.4		27098	27843	25620	26271	27339	26834.2		24711	24220	24779	24388	24323	24484.2		21304	22229	21669	22235	22478	21983
1016	32214	33171	31958	32503	31713	32311.8		31575	31818	31365	32702	32770	32046		31083	32072	32289	32827	32457	32145.6		30651	31162	29792	30433	29180	30243.6		27195	27940	25704	26369	27428	26927.2		24798	24308	24886	24472	24401	24573		21381	22324	21760	22309	22546	22064
1017	32369	33301	32072	32627	31833	32440.4		31699	31943	31487	32809	32906	32168.8		31203	32169	32416	32942	32565	32259		30756	31270	29892	30573	29291	30356.4		27298	28039	25795	26471	27518	27024.2		24896	24396	24964	24554	24509	24663.8		21457	22400	21845	22388	22599	22137.8
1018	32499	33433	32205	32735	31960	32566.4		31797	32071	31609	32914	33023	32282.8		31323	32297	32550	33060	32685	32383		30851	31392	29994	30672	29414	30464.6		27383	28144	25894	26550	27610	27116.2		24964	24492	25066	24653	24595	24754		21534	22481	21903	22461	22668	22209.4
1019	32615	33555	32321	32850	32065	32681.2		31934	32185	31725	33038	33134	32403.2		31441	32401	32657	33179	32809	32497.4		30986	31495	30106	30784	29518	30577.8		27478	28253	25968	26661	27708	27213.6		25051	24566	25147	24723	24660	24829.4		21599	22566	21973	22567	22738	22288.6
1020	32734	33657	32435	32962	32196	32796.8		32041	32300	31855	33132	33267	32519		31558	32515	32785	33302	32905	32613		31100	31596	30223	30893	29642	30690.8		27564	28358	26043	26760	27803	27305.6		25133	24663	25215	24823	24737	24914.2		21700	22646	22058	22650	22814	22373.6
1021	32854	33812	32546	33080	32348	32928		32163	32426	31980	33254	33388	32642.2		31682	32632	32900	33435	33027	32735.2		31215	31698	30329	30999	29752	30798.6		27654	28470	26124	26862	27906	27403.2		25225	24758	25294	24918	24807	25000.4		21769	22733	22146	22726	22907	22456.2
1022	32982	33964	32674	33203	32457	33056		32299	32543	32094	33377	33496	32761.8		31795	32743	33023	33564	33142	32853.4		31313	31807	30414	31104	29877	30903		27743	28579	26211	26952	28014	27499.8		25301	24855	25395	25004	24888	25088.6		21836	22810	22214	22800	22979	22527.8
1023	33116	34090	32791	33331	32571	33179.8		32410	32662	32215	33499	33616	32880.4		31927	32850	33141	33685	33261	32972.8		31415	31953	30498	31201	29983	31010		27825	28672	26300	27052	28124	27594.6		25375	24951	25488	25095	24968	25175.4		21905	22892	22295	22874	23075	22608.2
1024	33218	34215	32907	33456	32683	33295.8		32532	32783	32337	33611	33756	33003.8		32050	32974	33259	33823	33385	33098.2		31514	32077	30594	31323	30088	31119.2		27925	28766	26403	27121	28238	27690.6		25487	25039	25546	25180	25047	25259.8		21975	22956	22380	22945	23146	22680.4
1025	33340	34339	33010	33581	32810	33416		32649	32910	32446	33743	33890	33127.6		32150	33092	33383	33951	33496	33214.4		31652	32205	30693	31452	30190	31238.4		28019	28874	26497	27211	28337	27787.6		25575	25127	25632	25273	25143	25350		22051	23043	22453	23023	23221	22758.2
1026	33480	34465	33148	33709	32935	33547.4		32763	33016	32559	33854	34013	33241		32258	33197	33505	34078	33608	33329.2		31757	32319	30796	31560	30312	31348.8		28117	28985	26579	27333	28438	27890.4		25666	25220	25734	25363	25221	25440.8		22130	23111	22530	23105	23277	22830.6
1027	33623	34617	33276	33839	33053	33681.6		32873	33138	32684	33991	34144	33366		32403	33316	33632	34196	33706	33450.6		31873	32438	30911	31672	30415	31461.8		28222	29104	26661	27419	28542	27989.6		25768	25322	25818	25446	25307	25532.2		22207	23198	22599	23175	23354	22906.6
1028	33749	34742	33406	33965	33177	33807.8		32993	33242	32794	34125	34265	33483.8		32517	33455	33746	34315	33820	33570.6		31979	32548	31012	31786	30534	31571.8		28343	29204	26753	27517	28644	28092.2		25848	25420	25912	25521	25401	25620.4		22297	23280	22682	23260	23436	22991
1029	33873	34887	33541	34099	33304	33940.8		33118	33364	32889	34265	34414	33610		32623	33591	33869	34427	33946	33691.2		32096	32647	31110	31899	30648	31680		28447	29312	26840	27604	28735	28187.6		25944	25501	25971	25597	25510	25704.6		22378	23360	22757	23340	23496	23066.2
1030	34001	35018	33670	34227	33430	34069.2		33252	33459	33016	34381	34541	33729.8		32744	33717	34014	34546	34054	33815		32180	32744	31232	32023	30753	31786.4		28549	29409	26932	27724	28839	28290.6		26037	25577	26067	25686	25593	25792		22455	23421	22830	23418	23558	23136.4
1031	34147	35130	33781	34334	33568	34192		33395	33572	33119	34491	34686	33852.6		32864	33850	34134	34663	34177	33937.6		32286	32860	31355	32150	30858	31901.8		28643	29514	27030	27815	28928	28386		26149	25679	26170	25788	25679	25893		22541	23504	22889	23497	23637	23213.6
1032	34271	35264	33911	34467	33682	34319		33512	33690	33234	34614	34799	33969.8		32987	33978	34251	34787	34302	34061		32401	32981	31480	32266	30943	32014.2		28746	29614	27132	27908	29049	28489.8		26238	25773	26253	25887	25785	25987.2		22625	23583	22972	23559	23727	23293.2
1033	34402	35377	34027	34582	33822	34442		33618	33825	33382	34767	34925	34103.4		33135	34094	34391	34904	34418	34188.4		32522	33115	31592	32375	31045	32129.8		28828	29724	27219	27996	29132	28579.8		26328	25862	26342	25982	25867	26076.2		22688	23664	23064	23653	23818	23377.4
1034	34502	35506	34139	34725	33932	34560.8		33743	33960	33497	34889	35058	34229.4		33261	34223	34523	35044	34550	34320.2		32642	33237	31687	32512	31171	32249.8		28919	29834	27306	28088	29244	28678.2		26415	25950	26414	26079	25941	26159.8		22773	23739	23137	23733	23884	23453.2
1035	34632	35643	34241	34834	34056	34681.2		33870	34090	33631	35017	35215	34364.6		33361	34332	34664	35171	34682	34442		32748	33347	31787	32618	31283	32356.6		29022	29937	27386	28169	29357	28774.2		26508	26038	26499	26178	26046	26253.8		22851	23831	23201	23795	23952	23526
1036	34775	35785	34358	34960	34166	34808.8		34017	34211	33768	35140	35336	34494.4		33469	34458	34779	35298	34813	34563.4		32876	33453	31900	32733	31411	32474.6		29108	30062	27501	28272	29459	28880.4		26602	26142	26587	26261	26127	26343.8		22932	23904	23272	23891	24024	23604.6
1037	34870	35909	34489	35088	34291	34929.4		34138	34304	33912	35285	35462	34620.2		33592	34582	34905	35432	34945	34691.2		32984	33573	32049	32858	31531	32599		29228	30176	27612	28373	29552	28988.2		26696	26222	26668	26352	26233	26434.2		23019	23971	23350	23985	24107	23686.4
1038	35000	36041	34615	35221	34425	35060.4		34268	34442	34052	35412	35611	34757		33713	34714	35032	35559	35074	34818.4		33107	33698	32149	32990	31643	32717.4		29323	30300	27694	28472	29645	29086.8		26785	26317	26761	26423	26333	26523.8		23097	24048	23420	24076	24169	23762
1039	35120	36176	34749	35335	34557	35187.4		34389	34560	34157	35548	35758	34882.4		33830	34829	35144	35690	35216	34941.8		33226	33821	32272	33118	31728	32833		29429	30407	27791	28576	29757	29192		26876	26413	26849	26517	26428	26616.6		23182	24121	23485	24158	24248	23838.8
1040	35255	36311	34875	35454	34669	35312.8		34504	34681	34288	35673	35898	35008.8		33949	34948	35269	35810	35348	35064.8		33335	33959	32405	33241	31840	32956		29526	30530	27893	28678	29865	29298.4		26981	26484	26934	26607	26545	26710.2		23251	24206	23551	24230	24351	23917.8
1041	35383	36470	34996	35573	34825	35449.4		34620	34807	34393	35822	36034	35135.2		34074	35060	35407	35950	35474	35193		33455	34112	32544	33339	31955	33081		29623	30661	28003	28780	29967	29406.8		27077	26586	27009	26688	26629	26797.8		23325	24291	23630	24316	24458	24004
1042	35512	36592	35140	35728	34965	35587.4		34740	34924	34523	35944	36162	35258.6		34190	35181	35529	36098	35600	35319.6		33586	34216	32646	33449	32059	33191.2		29733	30773	28089	28889	30089	29514.6		27158	26673	27117	26788	26714	26890		23400	24362	23696	24392	24537	24077.4
1043	35640	36749	35252	35856	35117	35722.8		34868	35069	34647	36088	36308	35396		34294	35305	35679	36231	35734	35448.6		33737	34332	32728	33563	32156	33303.2		29824	30909	28180	28987	30180	29616		27250	26764	27229	26861	26800	26980.8		23470	24447	23762	24461	24622	24152.4
1044	35765	36893	35385	35989	35253	35857		35012	35185	34793	36200	36434	35524.8		34415	35438	35785	36350	35860	35569.6		33850	34445	32843	33672	32281	33418.2		29946	31036	28278	29083	30303	29729.2		27346	26846	27327	26954	26891	27072.8		23550	24538	23839	24552	24706	24237
1045	35888	37039	35497	36107	35373	35980.8		35151	35307	34919	36334	36557	35653.6		34540	35558	35902	36483	35985	35693.6		33980	34588	32974	33798	32390	33546		30071	31137	28382	29203	30411	29840.8		27456	26917	27414	27049	26975	27162.2		23620	24630	23918	24639	24778	24317
1046	36021	37170	35615	36233	35508	36109.4		35283	35427	35048	36466	36688	35782.4		34663	35675	36027	36619	36114	35819.6		34082	34699	33080	33913	32514	33657.6		30180	31260	28490	29316	30531	29955.4		27558	27007	27519	27156	27070	27262		23717	24699	24000	24722	24847	24397
1047	36174	37328	35723	36366	35649	36248		35426	35543	35186	36610	36836	35920.2		34792	35808	36168	36756	36236	35952		34187	34809	33210	34038	32633	33775.4		30287	31371	28604	29416	30624	30060.4		27656	27108	27613	27242	27160	27355.8		23793	24792	24085	24810	24938	24483.6
1048	36316	37460	35847	36501	35768	36378.4		35562	35666	35316	36736	36972	36050.4		34923	35952	36293	36889	36369	36085.2		34322	34929	33329	34153	32749	33896.4		30420	31491	28716	29503	30727	30171.4		27753	27208	27715	27342	27249	27453.4		23883	24870	24161	24896	25027	24567.4
1049	36453	37603	35992	36638	35914	36520		35708	35817	35433	36868	37106	36186.4		35042	36078	36423	37016	36524	36216.6		34436	35045	33443	34287	32864	34015		30525	31625	28802	29612	30849	30282.6		27854	27307	27796	27443	27338	27547.6		23963	24938	24228	24967	25114	24642
1050	36605	37749	36130	36773	36032	36657.8		35842	35944	35564	37002	37268	36324		35173	36210	36556	37132	36646	36343.4		34544	35176	33572	34415	33009	34143.2		30632	31738	28913	29702	30945	30386		27937	27402	27888	27544	27431	27640.4		24054	25017	24312	25048	25211	24728.4
1051	36755	37868	36253	36893	36179	36789.6		35985	36077	35700	37145	37430	36467.4		35296	36349	36705	37260	36785	36479		34681	35295	33671	34542	33117	34261.2		30741	31855	29016	29799	31068	30495.8		28031	27489	27978	27624	27517	27727.8		24131	25104	24395	25137	25298	24813
1052	36879	38008	36402	37023	36298	36922		36107	36183	35848	37275	37585	36599.6		35434	36480	36847	37373	36897	36606.2		34814	35436	33768	34668	33226	34382.4		30857	31977	29129	29914	31174	30610.2		28131	27591	28083	27722	27627	27830.8		24219	25198	24475	25233	25377	24900.4
1053	37007	38143	36537	37147	36431	37053		36228	36322	35995	37408	37730	36736.6		35576	36607	36963	37521	37036	36740.6		34950	35567	33900	34810	33345	34514.4		30948	32068	29237	30025	31293	30714.2		28233	27699	28178	27810	27711	27926.2		24302	25281	24539	25324	25456	24980.4
1054	37158	38284	36667	37293	36541	37188.6		36360	36464	36125	37563	37861	36874.6		35709	36747	37096	37667	37190	36881.8		35082	35724	34043	34951	33475	34655		31051	32192	29339	30138	31409	30825.8		28361	27790	28282	27909	27807	28029.8		24391	25375	24636	25417	25537	25071.2
1055	37293	38429	36796	37437	36668	37324.6		36501	36597	36265	37696	38001	37012		35837	36851	37210	37791	37314	37000.6		35214	35830	34180	35068	33584	34775.2		31158	32301	29442	30235	31510	30929.2		28460	27876	28366	28016	27896	28122.8		24480	25442	24722	25492	25617	25150.6
1056	37431	38577	36904	37592	36775	37455.8		36628	36748	36396	37830	38128	37146		35947	36980	37324	37945	37447	37128.6		35312	35965	34313	35185	33692	34893.4		31264	32392	29521	30331	31625	31026.6		28565	27966	28468	28127	27982	28221.6		24582	25528	24798	25580	25706	25238.8
1057	37575	38736	37039	37746	36919	37603		36778	36884	36528	37970	38263	37284.6		36067	37110	37467	38095	37565	37260.8		35427	36089	34441	35304	33817	35015.6		31379	32503	29618	30438	31720	31131.6		28658	28067	28561	28240	28087	28322.6		24680	25613	24877	25654	25792	25323.2
1058	37722	38884	37175	37873	37056	37742		36895	37017	36669	38102	38407	37418		36202	37233	37590	38232	37720	37395.4		35545	36227	34565	35429	33948	35142.8		31494	32616	29708	30578	31825	31244.2		28771	28154	28665	28342	28177	28421.8		24754	25691	24954	25734	25884	25403.4
1059	37863	39038	37321	38020	37227	37893.8		37032	37155	36784	38230	38549	37550		36331	37364	37718	38379	37872	37532.8		35689	36361	34689	35529	34057	35265		31610	32716	29816	30711	31926	31355.8		28861	28245	28774	28439	28280	28519.8		24830	25781	25049	25827	25977	25492.8
1060	38000	39186	37460	38154	37338	38027.6		37166	37297	36917	38345	38686	37682.2		36462	37489	37847	38514	38015	37665.4		35807	36492	34815	35658	34171	35388.6		31716	32820	29918	30826	32033	31462.6		28968	28340	28881	28528	28364	28616.2		24900	25856	25148	25917	26091	25582.4
1061	38138	39327	37595	38285	37457	38160.4		37307	37420	37060	38490	38829	37821.2		36591	37640	37972	38647	38164	37802.8		35935	36617	34927	35793	34296	35513.6		31818	32930	30039	30932	32154	31574.6		29068	28449	28979	28634	28476	28721.2		24980	25945	25226	26013	26200	25672.8
1062	38281	39467	37746	38424	37599	38303.4		37434	37577	37197	38615	38969	37958.4		36703	37773	38131	38770	38310	37937.4		36088	36744	35075	35910	34408	35645		31921	33043	30170	31042	32270	31689.2		29162	28560	29070	28737	28554	28816.6		25066	26012	25315	26101	26295	25757.8
1063	38421	39626	37892	38557	37711	38441.4		37582	37696	37338	38754	39117	38097.4		36838	37903	38270	38909	38440	38072		36214	36883	35182	36058	34525	35772.4		32045	33161	30271	31158	32393	31805.6		29266	28675	29170	28853	28660	28924.8		25141	26091	25403	26206	26382	25844.6
1064	38560	39786	38024	38694	37838	38580.4		37695	37832	37483	38915	39241	38233.2		36973	38020	38420	39049	38613	38215		36338	37008	35309	36181	34639	35895		32151	33285	30380	31263	32521	31920		29362	28758	29271	28957	28748	29019.2		25231	26193	25503	26309	26463	25939.8
1065	38707	39930	38138	38841	37977	38718.6		37837	37957	37616	39073	39372	38371		37106	38164	38556	39199	38746	38354.2		36471	37156	35438	36317	34742	36024.8		32277	33384	30474	31343	32632	32022		29455	28865	29379	29043	28849	29118.2		25309	26263	25581	26407	26558	26023.6
1066	38830	40104	38287	38960	38132	38862.6		37974	38094	37757	39217	39521	38512.6		37247	38297	38695	39346	38892	38495.4		36614	37288	35567	36447	34876	36158.4		32419	33482	30570	31470	32731	32134.4		29561	28968	29467	29140	28945	29216.2		25385	26351	25655	26488	26640	26103.8
1067	38970	40245	38440	39102	38267	39004.8		38119	38247	37893	39359	39653	38654.2		37364	38434	38847	39497	39033	38635		36748	37441	35680	36569	34990	36285.6		32516	33597	30679	31587	32862	32248.2		29652	29093	29573	29237	29045	29320		25483	26448	25749	26576	26726	26196.4
1068	39104	40395	38595	39248	38424	39153.2		38251	38394	38049	39500	39772	38793.2		37506	38573	38983	39625	39179	38773.2		36879	37582	35794	36704	35137	36419.2		32646	33718	30802	31690	32978	32366.8		29747	29173	29669	29338	29130	29411.4		25561	26546	25836	26659	26817	26283.8
1069	39233	40558	38740	39397	38591	39303.8		38389	38558	38179	39639	39916	38936.2		37643	38694	39116	39758	39309	38904		37020	37722	35926	36848	35279	36559		32753	33858	30915	31803	33100	32485.8		29843	29268	29758	29440	29234	29508.6		25653	26617	25932	26760	26894	26371.2
1070	39374	40710	38864	39542	38741	39446.2		38536	38698	38308	39821	40056	39083.8		37748	38834	39249	39893	39437	39032.2		37161	37842	36059	36990	35405	36691.4		32855	33987	31033	31905	33236	32603.2		29950	29369	29863	29537	29339	29611.6		25757	26693	26015	26870	26989	26464.8
1071	39526	40876	39004	39692	38889	39597.4		38700	38854	38468	39969	40198	39237.8		37880	38968	39367	40016	39588	39163.8		37284	38000	36170	37121	35527	36820.4		32963	34104	31131	32006	33354	32711.6		30069	29467	29967	29662	29443	29721.6		25845	26788	26097	26959	27092	26556.2
1072	39666	41020	39137	39835	39016	39734.8		38843	38993	38596	40096	40352	39376		38001	39095	39499	40136	39725	39291.2		37430	38141	36299	37272	35657	36959.8		33066	34230	31234	32124	33466	32824		30158	29576	30081	29754	29518	29817.4		25955	26881	26169	27053	27156	26642.8
1073	39857	41187	39308	39954	39167	39894.6		38989	39123	38734	40231	40494	39514.2		38129	39247	39645	40277	39869	39433.4		37556	38288	36441	37409	35790	37096.8		33202	34362	31349	32247	33578	32947.6		30261	29664	30174	29841	29620	29912		26042	26966	26258	27169	27230	26733
1074	39982	41346	39443	40082	39294	40029.4		39131	39246	38882	40377	40646	39656.4		38249	39381	39781	40389	40006	39561.2		37707	38442	36575	37554	35907	37237		33310	34471	31466	32389	33688	33064.8		30366	29772	30289	29945	29732	30020.8		26128	27051	26349	27258	27323	26821.8
1075	40126	41480	39591	40214	39425	40167.2		39268	39382	39032	40538	40762	39796.4		38371	39537	39936	40542	40139	39705		37838	38576	36721	37694	36037	37373.2		33396	34592	31582	32503	33803	33175.2		30467	29884	30391	30045	29863	30130		26215	27133	26440	27335	27412	26907
1076	40262	41621	39725	40360	39584	40310.4		39429	39509	39181	40681	40906	39941.2		38488	39686	40095	40677	40273	39843.8		37990	38718	36857	37816	36176	37511.4		33503	34696	31693	32633	33911	33287.2		30584	29990	30512	30163	29964	30242.6		26292	27210	26530	27412	27506	26990
1077	40406	41765	39854	40521	39709	40451		39591	39660	39310	40832	41048	40088.2		38608	39825	40234	40804	40429	39980		38141	38857	36989	37947	36317	37650.2		33626	34836	31800	32751	34054	33413.4		30701	30087	30616	30265	30090	30351.8		26378	27289	26623	27508	27600	27079.6
1078	40548	41913	39989	40661	39862	40594.6		39744	39819	39425	40991	41214	40238.6		38745	39960	40372	40938	40593	40121.6		38270	38992	37142	38083	36444	37786.2		33752	34969	31895	32860	34139	33523		30798	30192	30712	30394	30197	30458.6		26469	27359	26705	27610	27672	27163
1079	40704	42050	40139	40784	40018	40739		39884	39985	39556	41143	41355	40384.6		38864	40107	40511	41088	40718	40257.6		38419	39131	37267	38212	36563	37918.4		33874	35074	32010	32980	34253	33638.2		30920	30286	30810	30475	30308	30559.8		26564	27454	26781	27702	27782	27256.6
1080	40871	42196	40280	40960	40151	40891.6		40025	40130	39704	41315	41518	40538.4		39001	40264	40639	41225	40854	40396.6		38560	39251	37413	38342	36686	38050.4		34000	35185	32141	33119	34395	33768		31026	30401	30933	30572	30407	30667.8		26660	27539	26873	27801	27869	27348.4
1081	41011	42354	40431	41133	40312	41048.2		40176	40282	39845	41444	41658	40681		39143	40394	40804	41361	40995	40539.4		38693	39399	37529	38483	36831	38187		34127	35340	32243	33224	34514	33889.6		31147	30504	31043	30659	30511	30772.8		26753	27652	26974	27891	27952	27444.4
1082	41164	42488	40577	41264	40456	41189.8		40358	40415	39998	41593	41801	40833		39266	40545	40951	41520	41130	40682.4		38830	39524	37668	38606	36991	38323.8		34235	35460	32348	33338	34632	34002.6		31238	30628	31165	30759	30601	30878.2		26853	27759	27079	28001	28061	27550.6
1083	41317	42650	40719	41441	40624	41350.2		40515	40555	40144	41744	41944	40980.4		39424	40705	41085	41645	41249	40821.6		38962	39661	37818	38740	37105	38457.2		34339	35580	32466	33445	34757	34117.4		31345	30752	31283	30870	30716	30993.2		26957	27849	27176	28091	28158	27646.2
1084	41472	42824	40876	41598	40745	41503		40667	40711	40276	41879	42118	41130.2		39556	40826	41236	41788	41418	40964.8		39086	39805	37964	38880	37249	38596.8		34487	35709	32560	33565	34890	34242.2		31455	30858	31376	30967	30843	31099.8		27039	27941	27283	28175	28258	27739.2
1085	41630	42991	41019	41752	40874	41653.2		40796	40860	40441	42049	42264	41282		39708	40977	41385	41923	41570	41112.6		39216	39935	38099	39014	37390	38730.8		34603	35840	32684	33678	35013	34363.6		31551	30970	31492	31072	30950	31207		27133	28024	27384	28263	28330	27826.8
1086	41776	43155	41180	41915	41022	41809.6		40948	40989	40596	42218	42410	41432.2		39844	41118	41533	42080	41723	41259.6		39358	40048	38229	39193	37522	38870		34719	35958	32806	33775	35132	34478		31665	31083	31606	31192	31066	31322.4		27240	28119	27491	28359	28427	27927.2
1087	41925	43319	41349	42045	41167	41961		41087	41127	40740	42380	42553	41577.4		39990	41274	41678	42233	41867	41408.4		39504	40203	38375	39333	37657	39014.4		34832	36070	32924	33911	35260	34599.4		31778	31184	31705	31288	31173	31425.6		27322	28220	27586	28480	28524	28026.4
1088	42070	43486	41508	42175	41301	42108		41235	41253	40904	42528	42713	41726.6		40142	41410	41835	42370	42019	41555.2		39640	40334	38494	39466	37784	39143.6		34954	36188	33016	34031	35406	34719		31898	31299	31807	31386	31289	31535.8		27416	28301	27672	28582	28632	28120.6
1089	42226	43630	41664	42303	41483	42261.2		41386	41409	41064	42710	42865	41886.8		40283	41569	41985	42507	42151	41699		39779	40488	38657	39582	37915	39284.2		35081	36287	33155	34138	35523	34836.8		32001	31414	31905	31501	31371	31638.4		27497	28396	27766	28670	28739	28213.6
1090	42375	43799	41832	42470	41619	42419		41522	41568	41202	42867	43039	42039.6		40433	41697	42125	42666	42288	41841.8		39899	40623	38799	39740	38052	39422.6		35195	36401	33268	34274	35643	34956.2		32115	31534	32023	31611	31505	31757.6		27569	28494	27868	28776	28857	28312.8
1091	42522	43950	41965	42608	41760	42561		41661	41728	41359	43015	43185	42189.6		40571	41850	42277	42815	42433	41989.2		40047	40759	38938	39878	38200	39564.4		35342	36514	33386	34375	35771	35077.6		32219	31640	32136	31733	31623	31870.2		27660	28577	27953	28869	28977	28407.2
1092	42679	44117	42114	42746	41890	42709.2		41811	41892	41530	43170	43359	42352.4		40720	42011	42435	42984	42587	42147.4		40190	40904	39068	40040	38332	39706.8		35459	36661	33499	34483	35888	35198		32332	31726	32263	31846	31725	31978.4		27753	28663	28054	28959	29079	28501.6
1093	42850	44270	42267	42892	42056	42867		41942	42048	41672	43352	43535	42509.8		40872	42183	42604	43141	42753	42310.6		40334	41050	39186	40194	38482	39849.2		35582	36785	33611	34616	36033	35325.4		32443	31835	32380	31941	31843	32088.4		27832	28761	28148	29045	29168	28590.8
1094	43030	44426	42449	43044	42210	43031.8		42086	42192	41842	43502	43683	42661		41008	42307	42772	43281	42897	42453		40491	41196	39326	40317	38642	39994.4		35689	36908	33759	34723	36150	35445.8		32554	31942	32507	32067	31950	32204		27922	28885	28240	29144	29256	28689.4
1095	43194	44619	42603	43208	42371	43199		42217	42341	42025	43647	43842	42814.4		41183	42439	42926	43451	43042	42608.2		40660	41372	39462	40431	38796	40144.2		35806	37026	33898	34831	36265	35565.2		32684	32055	32623	32177	32073	32322.4		28018	28999	28341	29262	29335	28791
1096	43348	44803	42760	43385	42530	43365.2		42359	42504	42173	43783	44026	42969		41339	42591	43104	43615	43195	42768.8		40801	41529	39605	40574	38940	40289.8		35910	37163	34021	34941	36403	35687.6		32784	32155	32742	32277	32182	32428		28136	29109	28450	29366	29417	28895.6
1097	43509	44957	42931	43546	42681	43524.8		42519	42662	42315	43952	44186	43126.8		41479	42752	43240	43783	43343	42919.4		40952	41696	39752	40719	39071	40438		36034	37295	34154	35080	36538	35820.2		32889	32264	32853	32400	32306	32542.4		28214	29223	28548	29477	29535	28999.4
1098	43657	45139	43078	43713	42840	43685.4		42667	42784	42458	44095	44358	43272.4		41612	42893	43407	43930	43496	43067.6		41099	41839	39905	40864	39203	40582		36165	37431	34258	35208	36689	35950.2		32998	32385	32959	32519	32421	32656.4		28304	29354	28646	29581	29621	29101.2
1099	43818	45302	43239	43890	42980	43845.8		42819	42927	42606	44252	44511	43423		41766	43055	43558	44107	43662	43229.6		41230	42006	40052	40991	39344	40724.6		36303	37558	34363	35313	36812	36069.8		33105	32496	33089	32651	32520	32772.2		28392	29466	28748	29684	29734	29204.8
1100	43963	45482	43403	44038	43120	44001.2		42982	43086	42738	44399	44691	43579.2		41917	43218	43712	44292	43801	43388		41372	42139	40195	41126	39467	40859.8		36437	37706	34475	35453	36939	36202		33206	32598	33211	32772	32650	32887.4		28484	29560	28851	29779	29843	29303.4
1101	44126	45679	43557	44206	43247	44163		43136	43224	42894	44543	44849	43729.2		42051	43375	43857	44457	43960	43540		41508	42271	40338	41260	39600	40995.4		36579	37867	34600	35589	37074	36341.8		33331	32712	33342	32895	32787	33013.4		28572	29650	28940	29878	29939	29395.8
1102	44284	45840	43706	44359	43443	44326.4		43295	43375	43069	44689	45004	43886.4		42220	43549	44021	44621	44121	43706.4		41650	42420	40494	41397	39746	41141.4		36708	37968	34717	35729	37224	36469.2		33442	32819	33485	33005	32899	33130		28662	29733	29047	29972	30033	29489.4
1103	44442	46009	43848	44513	43595	44481.4		43446	43529	43232	44842	45156	44041		42380	43699	44192	44785	44278	43866.8		41774	42579	40651	41545	39883	41286.4		36842	38101	34829	35857	37363	36598.4		33564	32949	33617	33113	32999	33248.4		28779	29828	29141	30067	30139	29590.8
1104	44602	46182	44013	44676	43753	44645.2		43598	43710	43384	45011	45306	44201.8		42542	43826	44358	44925	44445	44019.2		41899	42741	40806	41673	40018	41427.4		36945	38242	34954	35974	37513	36725.6		33670	33059	33733	33228	33112	33360.4		28878	29946	29251	30161	30235	29694.2
1105	44771	46358	44181	44843	43905	44811.6		43744	43874	43516	45192	45500	44365.2		42671	43988	44520	45098	44593	44174		42037	42889	40943	41828	40141	41567.6		37081	38368	35079	36110	37648	36857.2		33779	33167	33864	33341	33228	33475.8		28966	30041	29354	30278	30343	29796.4
1106	44925	46506	44379	45007	44064	44976.2		43921	44053	43676	45356	45668	44534.8		42826	44128	44669	45254	44738	44323		42190	43040	41085	41971	40279	41713		37219	38509	35205	36241	37774	36989.6		33891	33283	34001	33477	33346	33599.6		29073	30126	29442	30367	30448	29891.2
1107	45100	46674	44528	45190	44235	45145.4		44072	44208	43832	45536	45844	44698.4		42989	44295	44834	45418	44902	44487.6		42337	43206	41239	42134	40424	41868		37361	38652	35340	36365	37917	37127		34033	33410	34132	33591	33460	33725.2		29159	30232	29541	30498	30551	29996.2
1108	45281	46867	44700	45365	44393	45321.2		44235	44375	43977	45701	46000	44857.6		43119	44444	44991	45573	45075	44640.4		42495	43364	41369	42283	40570	42016.2		37506	38792	35467	36500	38058	37264.6		34158	33539	34251	33718	33562	33845.6		29226	30333	29618	30598	30652	30085.4
1109	45444	47044	44861	45511	44542	45480.4		44380	44525	44122	45852	46173	45010.4		43271	44615	45138	45739	45254	44803.4		42651	43523	41512	42425	40704	42163		37614	38938	35586	36628	38174	37388		34281	33645	34394	33827	33683	33966		29303	30443	29729	30699	30748	30184.4
1110	45598	47225	45038	45706	44710	45655.4		44543	44698	44276	46026	46321	45172.8		43424	44763	45286	45879	45428	44956		42787	43690	41677	42580	40842	42315.2		37736	39084	35718	36759	38291	37517.6		34394	33760	34515	33946	33789	34080.8		29404	30541	29848	30799	30846	30287.6
1111	45766	47402	45203	45886	44891	45829.6		44715	44831	44424	46201	46487	45331.6		43575	44926	45454	46037	45572	45112.8		42944	43850	41835	42743	40974	42469.2		37869	39246	35831	36883	38409	37647.6		34503	33880	34652	34063	33926	34204.8		29499	30640	29959	30914	30939	30390.2
1112	45917	47595	45356	46059	45025	45990.4		44873	45009	44598	46382	46663	45505		43731	45076	45602	46196	45740	45269		43095	44003	41960	42898	41121	42615.4		38022	39415	35961	37023	38556	37795.4		34628	33988	34778	34178	34046	34323.6		29583	30750	30057	31014	31039	30488.6
1113	46101	47773	45522	46248	45223	46173.4		45040	45174	44735	46569	46840	45671.6		43863	45229	45774	46380	45898	45428.8		43257	44159	42099	43066	41263	42768.8		38157	39561	36058	37161	38684	37924.2		34743	34098	34909	34309	34161	34444		29691	30852	30149	31121	31145	30591.6
1114	46289	47967	45688	46426	45404	46354.8		45174	45356	44907	46754	47000	45838.2		44038	45402	45938	46547	46069	45598.8		43423	44300	42244	43212	41419	42919.6		38286	39679	36188	37303	38817	38054.6		34865	34222	35021	34437	34300	34569		29792	30953	30246	31225	31252	30693.6
1115	46459	48132	45877	46582	45568	46523.6		45324	45553	45055	46922	47183	46007.4		44187	45595	46083	46724	46226	45763		43578	44452	42412	43358	41542	43068.4		38390	39821	36311	37435	38966	38184.6		34996	34322	35142	34562	34453	34695		29895	31055	30337	31330	31369	30797.2
1116	46647	48309	46045	46758	45729	46697.6		45476	45736	45222	47087	47356	46175.4		44331	45752	46237	46876	46380	45915.2		43723	44593	42559	43471	41685	43206.2		38513	39964	36436	37557	39104	38314.8		35117	34460	35276	34673	34578	34820.8		30003	31151	30439	31427	31493	30902.6
1117	46809	48493	46195	46936	45893	46865.2		45621	45903	45403	47251	47508	46337.2		44474	45914	46408	47041	46535	46074.4		43876	44718	42682	43638	41828	43348.4		38638	40106	36562	37686	39264	38451.2		35267	34575	35425	34807	34704	34955.6		30117	31271	30541	31552	31603	31016.8
1118	46974	48675	46370	47104	46061	47036.8		45786	46088	45562	47441	47664	46508.2		44636	46099	46550	47218	46725	46245.6		44032	44871	42826	43802	41961	43498.4		38764	40223	36690	37815	39424	38583.2		35391	34694	35548	34936	34819	35077.6		30237	31391	30651	31648	31731	31131.6
1119	47149	48848	46526	47284	46208	47203		45936	46274	45728	47599	47847	46676.8		44791	46259	46711	47398	46907	46413.2		44176	45030	42970	43976	42107	43651.8		38895	40349	36806	37946	39554	38710		35505	34805	35652	35053	34930	35189		30337	31486	30737	31760	31843	31232.6
1120	47334	49063	46693	47457	46386	47386.6		46117	46434	45896	47774	48014	46847		44951	46438	46881	47579	47082	46586.2		44325	45171	43121	44128	42235	43796		39042	40495	36911	38090	39701	38847.8		35615	34945	35785	35200	35047	35318.4		30451	31588	30840	31853	31952	31336.8
1121	47524	49224	46887	47629	46554	47563.6		46261	46596	46042	47961	48177	47007.4		45127	46621	47062	47758	47247	46763		44476	45327	43269	44300	42366	43947.6		39191	40636	37033	38251	39839	38990		35740	35071	35906	35331	35175	35444.6		30543	31704	30963	31954	32063	31445.4
1122	47704	49392	47058	47787	46733	47734.8		46431	46768	46213	48110	48355	47175.4		45275	46785	47209	47902	47422	46918.6		44661	45511	43408	44444	42522	44109.2		39341	40783	37175	38380	39989	39133.6		35875	35178	36041	35449	35300	35568.6		30643	31817	31062	32044	32173	31547.8
1123	47880	49590	47206	47973	46919	47913.6		46587	46917	46383	48270	48533	47338		45435	46966	47382	48078	47593	47090.8		44838	45692	43556	44584	42685	44271		39479	40921	37296	38507	40125	39265.6		35995	35312	36174	35567	35417	35693		30766	31928	31145	32139	32294	31654.4
1124	48065	49758	47374	48156	47103	48091.2		46742	47094	46534	48454	48678	47500.4		45589	47142	47559	48223	47782	47259		45002	45866	43730	44763	42828	44437.8		39629	41069	37420	38622	40265	39401		36111	35437	36296	35676	35553	35814.6		30877	32042	31264	32233	32428	31768.8
1125	48249	49944	47554	48355	47271	48274.6		46908	47258	46694	48619	48850	47665.8		45750	47305	47744	48396	47966	47432.2		45165	46015	43879	44910	42986	44591		39775	41210	37540	38766	40406	39539.4		36232	35571	36416	35812	35678	35941.8		30991	32155	31375	32344	32535	31880
1126	48403	50147	47720	48523	47452	48449		47092	47457	46864	48793	49019	47845		45909	47476	47925	48569	48131	47602		45326	46175	44014	45034	43148	44739.4		39923	41362	37670	38907	40546	39681.6		36337	35706	36512	35957	35801	36062.6		31094	32267	31479	32434	32660	31986.8
1127	48580	50318	47915	48693	47612	48623.6		47251	47624	47035	48980	49194	48016.8		46079	47642	48095	48752	48274	47768.4		45493	46337	44168	45171	43313	44896.4		40088	41508	37814	39031	40673	39822.8		36477	35828	36628	36111	35946	36198		31191	32387	31577	32538	32759	32090.4
1128	48786	50502	48099	48875	47778	48808		47415	47783	47198	49163	49363	48184.4		46255	47809	48277	48910	48431	47936.4		45657	46506	44312	45313	43457	45049		40232	41656	37965	39180	40824	39971.4		36608	35963	36759	36252	36089	36334.2		31288	32508	31677	32651	32877	32200.2
1129	48993	50680	48286	49038	47961	48991.6		47578	47954	47348	49350	49533	48352.6		46418	47973	48449	49064	48617	48104.2		45812	46670	44480	45459	43594	45203		40372	41807	38094	39329	40963	40113		36727	36095	36877	36370	36219	36457.6		31389	32616	31790	32761	32988	32308.8
1130	49180	50892	48500	49231	48126	49185.8		47746	48161	47522	49496	49706	48526.2		46569	48140	48622	49235	48824	48278		45988	46826	44639	45621	43731	45361		40499	41934	38240	39478	41115	40253.2		36834	36236	37001	36489	36362	36584.4		31511	32732	31897	32903	33091	32426.8
1131	49351	51070	48684	49395	48291	49358.2		47867	48315	47704	49687	49875	48689.6		46737	48318	48794	49436	48994	48455.8		46123	47000	44775	45777	43901	45515.2		40616	42084	38392	39613	41247	40390.4		36955	36337	37146	36603	36491	36706.4		31602	32823	32024	33004	33204	32531.4
1132	49526	51251	48887	49598	48476	49547.6		48043	48496	47880	49897	50024	48868		46910	48483	48954	49606	49165	48623.6		46287	47190	44940	45939	44069	45685		40757	42230	38519	39743	41380	40525.8		37073	36477	37283	36721	36609	36832.6		31696	32933	32138	33102	33323	32638.4
1133	49705	51444	49075	49771	48670	49733		48224	48663	48029	50088	50205	49041.8		47050	48654	49117	49800	49343	48792.8		46453	47380	45087	46093	44235	45849.6		40930	42380	38636	39888	41516	40670		37194	36624	37421	36846	36752	36967.4		31787	33064	32260	33223	33433	32753.4
1134	49888	51638	49226	49957	48840	49909.8		48386	48833	48201	50264	50409	49218.6		47202	48825	49320	49971	49544	48972.4		46605	47549	45248	46256	44393	46010.2		41104	42526	38761	40020	41665	40815.2		37334	36757	37542	36993	36886	37102.4		31885	33187	32349	33321	33542	32856.8
1135	50071	51826	49409	50170	49036	50102.4		48565	48993	48377	50426	50601	49392.4		47365	49015	49492	50164	49728	49152.8		46771	47705	45393	46433	44544	46169.2		41240	42662	38895	40172	41815	40956.8		37470	36887	37707	37122	37010	37239.2		32011	33290	32470	33428	33657	32971.2
1136	50242	51991	49596	50354	49226	50281.8		48735	49180	48559	50587	50765	49565.2		47539	49186	49655	50311	49922	49322.6		46930	47839	45552	46576	44688	46317		41371	42803	39003	40340	41974	41098.2		37614	37022	37829	37227	37149	37368.2		32128	33428	32590	33542	33770	33091.6
1137	50414	52194	49754	50541	49421	50464.8		48920	49380	48735	50775	50924	49746.8		47734	49368	49819	50495	50091	49501.4		47093	48012	45717	46727	44842	46478.2		41509	42961	39118	40483	42131	41240.4		37772	37144	37961	37355	37285	37503.4		32232	33546	32697	33659	33888	33204.4
1138	50602	52390	49933	50731	49620	50655.2		49097	49562	48918	50963	51113	49930.6		47893	49537	49991	50683	50281	49677		47257	48160	45861	46892	44981	46630.2		41660	43119	39255	40644	42290	41393.6		37913	37260	38059	37494	37406	37626.4		32324	33671	32802	33778	34001	33315.2
1139	50798	52577	50155	50922	49832	50856.8		49267	49767	49097	51170	51280	50116.2		48062	49725	50166	50879	50456	49857.6		47407	48342	46015	47034	45148	46789.2		41797	43287	39369	40809	42430	41538.4		38049	37370	38186	37637	37514	37751.2		32433	33784	32917	33892	34116	33428.4
1140	50972	52764	50354	51134	50034	51051.6		49469	49961	49253	51368	51466	50303.4		48241	49883	50343	51029	50635	50026.2		47563	48492	46161	47211	45291	46943.6		41939	43431	39524	40954	42605	41690.6		38189	37485	38304	37760	37644	37876.4		32555	33912	33008	34003	34230	33541.6
1141	51157	52943	50551	51306	50214	51234.2		49644	50117	49430	51569	51665	50485		48372	50074	50540	51215	50833	50206.8		47713	48669	46337	47375	45449	47108.6		42102	43574	39676	41077	42753	41836.4		38308	37622	38432	37877	37782	38004.2		32647	34027	33116	34121	34355	33653.2
1142	51332	53150	50730	51498	50424	51426.8		49815	50296	49622	51745	51829	50661.4		48558	50287	50703	51384	51024	50391.2		47881	48844	46514	47532	45583	47270.8		42270	43713	39814	41203	42875	41975		38461	37734	38576	38037	37935	38148.6		32774	34141	33219	34255	34472	33772.2
1143	51535	53344	50925	51683	50629	51623.2		49998	50475	49839	51919	51999	50846		48755	50455	50886	51582	51199	50575.4		48045	49024	46688	47700	45743	47440		42421	43843	39961	41354	43016	42119		38593	37867	38711	38146	38048	38273		32898	34238	33337	34367	34595	33887
1144	51712	53534	51124	51875	50816	51812.2		50193	50665	50005	52118	52200	51036.2		48943	50633	51053	51753	51386	50753.6		48249	49204	46858	47873	45899	47616.6		42581	44017	40104	41488	43155	42269		38743	37997	38832	38269	38185	38405.2		32991	34371	33453	34501	34697	34002.6
1145	51902	53742	51300	52104	51010	52011.6		50401	50814	50187	52306	52429	51227.4		49130	50847	51231	51930	51573	50942.2		48439	49366	47012	48049	46070	47787.2		42724	44161	40227	41619	43291	42404.4		38845	38130	38977	38379	38331	38532.4		33094	34503	33564	34611	34816	34117.6
1146	52093	53947	51467	52345	51202	52210.8		50597	51012	50396	52481	52604	51418		49292	51025	51402	52120	51755	51118.8		48612	49549	47197	48209	46228	47959		42886	44318	40382	41775	43476	42567.4		38995	38268	39121	38521	38452	38671.4		33204	34609	33683	34730	34935	34232.2
1147	52291	54152	51649	52555	51395	52408.4		50800	51182	50566	52678	52782	51601.6		49489	51201	51584	52265	51951	51298		48798	49733	47377	48400	46391	48139.8		43043	44492	40524	41924	43604	42717.4		39126	38377	39258	38646	38558	38793		33335	34710	33793	34852	35075	34353
1148	52500	54341	51843	52772	51565	52604.2		50998	51383	50758	52847	52972	51791.6		49696	51390	51778	52463	52167	51498.8		48981	49924	47553	48573	46548	48315.8		43199	44635	40668	42063	43755	42864		39248	38499	39402	38799	38682	38926		33438	34835	33902	34969	35184	34465.6
1149	52723	54519	52056	52970	51753	52804.2		51177	51571	50931	53042	53163	51976.8		49866	51578	51956	52675	52327	51680.4		49161	50081	47729	48737	46725	48486.6		43364	44772	40814	42221	43875	43009.2		39387	38596	39526	38939	38818	39053.2		33542	34969	34014	35098	35300	34584.6
1150	52932	54710	52243	53159	51937	52996.2		51372	51771	51118	53254	53346	52172.2		50042	51745	52131	52888	52507	51862.6		49349	50249	47909	48908	46912	48665.4		43524	44916	40951	42354	44022	43153.4		39535	38755	39655	39072	38913	39186		33662	35097	34132	35205	35412	34701.6
1151	53115	54909	52436	53364	52129	53190.6		51542	51952	51306	53446	53562	52361.6		50246	51945	52314	53096	52703	52060.8		49540	50419	48066	49068	47070	48832.6		43658	45043	41101	42489	44197	43297.6		39655	38884	39797	39212	39045	39318.6		33770	35220	34247	35297	35540	34814.8
1152	53323	55148	52661	53559	52330	53404.2		51739	52140	51473	53621	53757	52546		50434	52144	52502	53307	52877	52252.8		49718	50616	48252	49277	47228	49018.2		43829	45210	41256	42635	44356	43457.2		39785	39016	39935	39341	39186	39452.6		33882	35342	34372	35396	35670	34932.4
1153	53520	55344	52860	53749	52515	53597.6		51957	52334	51670	53813	53959	52746.6		50611	52323	52675	53489	53059	52431.4		49900	50791	48414	49458	47396	49191.8		43983	45370	41419	42782	44509	43612.6		39927	39158	40071	39469	39309	39586.8		34000	35462	34497	35513	35789	35052.2
1154	53724	55531	53056	53939	52720	53794		52162	52536	51861	54026	54152	52947.4		50829	52548	52837	53684	53260	52631.6		50095	50970	48573	49627	47572	49367.4		44124	45502	41580	42959	44669	43766.8		40057	39300	40219	39588	39455	39723.8		34122	35579	34627	35639	35932	35179.8
1155	53915	55743	53264	54169	52912	54000.6		52350	52727	52044	54215	54360	53139.2		50998	52737	53048	53871	53436	52818		50263	51167	48745	49824	47742	49548.2		44276	45668	41730	43110	44853	43927.4		40184	39439	40339	39717	39588	39853.4		34232	35710	34746	35754	36065	35301.4
1156	54086	55977	53447	54381	53124	54203		52552	52944	52221	54450	54574	53348.2		51186	52925	53242	54073	53611	53007.4		50457	51360	48935	50017	47901	49734		44443	45840	41887	43270	44999	44087.8		40312	39583	40487	39838	39716	39987.2		34354	35824	34859	35872	36179	35417.6
1157	54286	56158	53671	54579	53340	54406.8		52719	53153	52406	54659	54778	53543		51354	53110	53424	54284	53799	53194.2		50644	51549	49118	50210	48052	49914.6		44593	46004	42019	43412	45140	44233.6		40426	39718	40634	39984	39827	40117.8		34471	35936	34990	35986	36301	35536.8
1158	54462	56378	53849	54785	53530	54600.8		52927	53343	52604	54836	54968	53735.6		51535	53325	53609	54497	53983	53389.8		50842	51734	49286	50369	48239	50094		44728	46155	42148	43559	45315	44381		40561	39865	40753	40132	39957	40253.6		34584	36051	35106	36116	36423	35656
1159	54651	56607	54031	54999	53761	54809.8		53111	53546	52799	55058	55168	53936.4		51736	53512	53799	54684	54190	53584.2		51044	51906	49465	50550	48401	50273.2		44895	46331	42301	43719	45461	44541.4		40729	40014	40914	40257	40115	40405.8		34718	36155	35236	36230	36563	35780.4
1160	54846	56819	54256	55194	53955	55014		53306	53734	52989	55277	55357	54132.6		51951	53708	53988	54906	54377	53786		51242	52089	49632	50737	48552	50450.4		45053	46495	42462	43859	45620	44697.8		40858	40148	41040	40382	40263	40538.2		34842	36299	35367	36343	36688	35907.8
1161	55017	57027	54499	55439	54158	55228		53517	53917	53156	55483	55557	54326		52139	53919	54186	55099	54567	53982		51416	52284	49822	50917	48717	50631.2		45207	46674	42603	43998	45764	44849.2		40980	40285	41187	40532	40408	40678.4		34944	36420	35498	36470	36795	36025.4
1162	55193	57236	54679	55647	54369	55424.8		53732	54108	53363	55664	55785	54530.4		52334	54095	54404	55289	54763	54177		51598	52450	50009	51104	48902	50812.6		45377	46819	42759	44128	45926	45001.8		41107	40422	41351	40669	40541	40818		35049	36543	35605	36570	36923	36138
1163	55389	57447	54887	55888	54586	55639.4		53913	54319	53558	55862	55961	54722.6		52526	54266	54606	55489	54978	54373		51769	52630	50167	51278	49069	50982.6		45530	46981	42908	44278	46086	45156.6		41243	40567	41497	40808	40672	40957.4		35158	36648	35711	36697	37034	36249.6
1164	55600	57669	55121	56081	54774	55849		54132	54512	53762	56088	56142	54927.2		52723	54445	54815	55720	55186	54577.8		51935	52799	50339	51449	49230	51150.4		45688	47126	43067	44421	46243	45309		41383	40721	41649	40943	40819	41103		35279	36778	35830	36810	37159	36371.2
1165	55791	57865	55317	56282	54979	56046.8		54325	54725	53949	56265	56336	55120		52919	54658	55022	55923	55396	54783.6		52127	52976	50516	51620	49389	51325.6		45846	47284	43199	44584	46400	45462.6		41504	40891	41802	41056	40951	41240.8		35387	36913	35954	36931	37293	36495.6
1166	56026	58075	55520	56495	55206	56264.4		54540	54938	54153	56508	56541	55336		53134	54847	55200	56119	55608	54981.6		52300	53166	50699	51822	49554	51508.2		45983	47445	43337	44724	46545	45606.8		41669	41026	41954	41188	41089	41385.2		35513	37040	36066	37081	37408	36621.6
1167	56227	58283	55719	56739	55407	56475		54725	55137	54335	56747	56753	55539.4		53318	55054	55384	56323	55823	55180.4		52478	53362	50861	52010	49726	51687.4		46150	47614	43491	44890	46712	45771.4		41793	41164	42112	41348	41212	41525.8		35621	37153	36177	37202	37546	36739.8
1168	56458	58500	55937	56976	55613	56696.8		54908	55334	54562	56939	56942	55737		53529	55256	55600	56556	56002	55388.6		52663	53542	51045	52193	49907	51870		46323	47804	43643	45018	46859	45929.4		41961	41304	42228	41492	41362	41669.4		35708	37281	36303	37317	37671	36856
1169	56664	58728	56151	57173	55817	56906.6		55112	55533	54737	57116	57139	55927.4		53754	55479	55818	56747	56174	55594.4		52860	53711	51209	52383	50091	52050.8		46480	47968	43785	45179	47056	46093.6		42098	41441	42382	41676	41517	41822.8		35823	37400	36460	37452	37791	36985.2
1170	56886	58927	56354	57382	56036	57117		55333	55738	54946	57309	57351	56135.4		53954	55687	56020	56963	56399	55804.6		53019	53928	51377	52557	50257	52227.6		46632	48147	43937	45349	47226	46258.2		42231	41607	42485	41835	41677	41967		35967	37528	36562	37587	37922	37113.2
1171	57130	59142	56552	57609	56249	57336.4		55539	55944	55159	57506	57559	56341.4		54137	55881	56215	57180	56619	56006.4		53218	54129	51563	52750	50429	52417.8		46781	48311	44096	45526	47393	46421.4		42367	41747	42627	41960	41822	42104.6		36092	37649	36673	37705	38046	37233
1172	57374	59360	56770	57816	56447	57553.4		55753	56146	55364	57713	57754	56546		54341	56061	56392	57397	56816	56201.4		53395	54319	51767	52931	50593	52601		46977	48508	44249	45684	47582	46600		42513	41876	42777	42100	41967	42246.6		36210	37779	36788	37827	38193	37359.4
1173	57568	59573	56973	58025	56670	57761.8		55975	56340	55585	57943	57965	56761.6		54548	56280	56605	57630	57056	56423.8		53569	54500	51938	53115	50763	52777		47156	48675	44391	45862	47755	46767.8		42663	42010	42922	42257	42106	42391.6		36337	37912	36907	37958	38322	37487.2
1174	57799	59785	57160	58246	56916	57981.2		56178	56528	55810	58198	58203	56983.4		54752	56497	56803	57836	57280	56633.6		53782	54687	52117	53322	50956	52972.8		47304	48841	44564	46036	47927	46934.4		42820	42170	43094	42410	42257	42550.2		36463	38045	37055	38074	38492	37625.8
1175	58026	60007	57368	58476	57120	58199.4		56429	56741	56023	58414	58420	57205.4		54937	56707	57031	58047	57475	56839.4		53969	54885	52312	53503	51134	53160.6		47468	48988	44704	46200	48086	47089.2		42960	42314	43236	42553	42393	42691.2		36594	38169	37163	38211	38615	37750.4
1176	58252	60248	57586	58680	57349	58423		56629	56936	56218	58607	58630	57404		55159	56921	57237	58260	57679	57051.2		54180	55051	52484	53719	51322	53351.2		47630	49161	44846	46355	48257	47249.8		43094	42478	43385	42688	42540	42837		36698	38268	37271	38345	38757	37867.8
1177	58482	60446	57809	58890	57547	58634.8		56835	57118	56414	58805	58863	57607		55368	57146	57459	58477	57867	57263.4		54389	55243	52665	53889	51478	53532.8		47773	49330	45018	46514	48422	47411.4		43234	42627	43545	42827	42690	42984.6		36831	38405	37390	38483	38881	37998
1178	58715	60688	58042	59114	57761	58864		57070	57337	56606	59006	59057	57815.2		55560	57346	57681	58676	58076	57467.8		54610	55444	52848	54069	51661	53726.4		47922	49504	45199	46679	48588	47578.4		43363	42776	43700	42969	42820	43125.6		36952	38537	37518	38625	39014	38129.2
1179	58920	60905	58259	59340	57976	59080		57295	57531	56802	59228	59282	58027.6		55754	57532	57905	58901	58293	57677		54798	55650	53048	54271	51863	53926		48097	49687	45356	46828	48775	47748.6		43518	42912	43873	43109	42964	43275.2		37094	38662	37641	38766	39164	38265.4
1180	59154	61161	58506	59559	58190	59314		57479	57721	57013	59433	59500	58229.2		55951	57744	58122	59097	58495	57881.8		54964	55874	53236	54475	52079	54125.6		48272	49839	45509	46995	48951	47913.2		43667	43055	44020	43266	43096	43420.8		37211	38782	37773	38912	39314	38398.4
1181	59367	61363	58719	59790	58403	59528.4		57696	57909	57196	59635	59723	58431.8		56139	57965	58329	59291	58719	58088.6		55155	56068	53438	54676	52273	54322		48434	50044	45671	47164	49119	48086.4		43826	43210	44212	43414	43275	43587.4		37330	38907	37898	39038	39448	38524.2
1182	59593	61591	58941	60023	58615	59752.6		57912	58094	57413	59855	59948	58644.4		56352	58158	58550	59514	58926	58300		55327	56282	53634	54869	52464	54515.2		48617	50217	45837	47353	49281	48261		43969	43347	44361	43590	43429	43739.2		37465	39038	38051	39163	39573	38658
1183	59828	61826	59168	60256	58816	59978.8		58152	58320	57613	60061	60148	58858.8		56570	58395	58749	59733	59125	58514.4		55524	56464	53831	55041	52650	54702		48818	50397	45991	47518	49437	48432.2		44131	43472	44508	43728	43584	43884.6		37602	39166	38180	39279	39729	38791.2
1184	60050	62040	59408	60478	59058	60206.8		58391	58564	57810	60277	60385	59085.4		56806	58631	58963	59964	59335	58739.8		55722	56648	54024	55238	52851	54896.6		49008	50553	46157	47713	49603	48606.8		44272	43638	44670	43885	43724	44037.8		37732	39293	38302	39407	39870	38920.8
1185	60284	62275	59634	60702	59277	60434.4		58603	58781	58014	60496	60604	59299.6		56982	58856	59161	60186	59556	58948.2		55917	56855	54205	55424	53043	55088.8		49203	50741	46329	47901	49768	48788.4		44432	43792	44826	44019	43873	44188.4		37835	39413	38418	39570	40024	39052
1186	60524	62560	59853	60947	59493	60675.4		58824	58990	58231	60673	60875	59518.6		57184	59055	59383	60419	59757	59159.6		56107	57092	54412	55634	53227	55294.4		49346	50922	46486	48071	49965	48958		44598	43969	44985	44155	44015	44344.4		37972	39562	38552	39703	40147	39187.2
1187	60726	62791	60067	61152	59692	60885.6		59033	59175	58446	60890	61089	59726.6		57390	59279	59638	60667	59951	59385		56290	57298	54584	55842	53435	55489.8		49524	51082	46654	48243	50124	49125.4		44772	44137	45131	44321	44164	44505		38091	39728	38675	39840	40289	39324.6
1188	60931	63005	60303	61382	59936	61111.4		59255	59406	58682	61131	61307	59956.2		57591	59507	59852	60912	60170	59606.4		56505	57498	54765	56042	53649	55691.8		49681	51248	46820	48392	50276	49283.4		44914	44287	45263	44491	44325	44656		38205	39866	38802	39972	40418	39452.6
1189	61163	63260	60525	61589	60155	61338.4		59472	59606	58904	61361	61505	60169.6		57812	59731	60088	61145	60379	59831		56733	57703	54971	56256	53851	55902.8		49866	51408	47008	48567	50456	49461		45050	44396	45396	44636	44484	44792.4		38349	39992	38927	40095	40555	39583.6
1190	61374	63493	60767	61824	60361	61563.8		59721	59849	59142	61582	61714	60401.6		58067	59938	60306	61376	60606	60058.6		56945	57899	55192	56451	54041	56105.6		50027	51605	47159	48740	50628	49631.8		45201	44563	45534	44797	44648	44948.6		38468	40165	39059	40220	40700	39722.4
1191	61587	63737	61020	62003	60590	61787.4		59921	60060	59349	61794	61927	60610.2		58263	60167	60530	61586	60845	60278.2		57124	58117	55387	56677	54227	56306.4		50206	51788	47293	48912	50798	49799.4		45364	44752	45682	44975	44826	45119.8		38604	40301	39186	40356	40850	39859.4
1192	61799	63984	61227	62231	60817	62011.6		60132	60273	59571	62007	62148	60826.2		58481	60401	60733	61812	61048	60495		57332	58293	55592	56890	54435	56508.4		50381	51965	47476	49066	50979	49973.4		45529	44908	45816	45150	44996	45279.8		38738	40431	39327	40492	40960	39989.6
1193	62034	64208	61470	62484	61053	62249.8		60369	60470	59766	62203	62398	61041.2		58714	60638	60984	62034	61281	60730.2		57524	58505	55804	57085	54621	56707.8		50528	52195	47642	49236	51161	50152.4		45702	45087	45964	45308	45140	45440.2		38883	40573	39467	40621	41100	40128.8
1194	62267	64453	61691	62709	61282	62480.4		60603	60687	59977	62420	62612	61259.8		58917	60847	61191	62249	61494	60939.6		57739	58698	56014	57302	54827	56916		50699	52377	47813	49414	51361	50332.8		45870	45247	46131	45469	45293	45602		39034	40697	39626	40774	41220	40270.2
1195	62523	64683	61929	62941	61524	62720		60820	60897	60180	62643	62833	61474.6		59138	61062	61403	62488	61709	61160		57960	58894	56209	57521	55072	57131.2		50869	52559	47984	49563	51521	50499.2		46046	45410	46300	45622	45442	45764		39189	40849	39751	40942	41346	40415.4
1196	62747	64926	62146	63177	61750	62949.2		61030	61130	60402	62864	63064	61698		59338	61297	61626	62715	61931	61381.4		58178	59112	56408	57723	55285	57341.2		51041	52744	48127	49760	51726	50679.6		46220	45566	46439	45796	45597	45923.6		39319	40976	39864	41078	41479	40543.2
1197	62978	65181	62370	63398	61990	63183.4		61260	61322	60638	63105	63295	61924		59544	61533	61842	62935	62117	61594.2		58388	59326	56599	57946	55519	57555.6		51252	52945	48306	49942	51900	50869		46365	45741	46602	45951	45752	46082.2		39437	41117	40002	41210	41622	40677.6
1198	63228	65424	62595	63652	62228	63425.4		61477	61552	60825	63355	63528	62147.4		59764	61719	62078	63172	62325	61811.6		58571	59556	56811	58138	55728	57760.8		51438	53142	48491	50107	52089	51053.4		46529	45883	46745	46134	45919	46242		39566	41247	40130	41344	41742	40805.8
1199	63470	65668	62835	63899	62448	63664		61695	61772	61062	63587	63769	62377		59981	61968	62294	63410	62567	62044		58777	59783	57020	58370	55931	57976.2		51616	53345	48676	50299	52263	51239.8		46681	46063	46888	46297	46077	46401.2		39711	41382	40265	41473	41912	40948.6
1200	63688	65923	63040	64146	62673	63894		61932	61956	61278	63793	64017	62595.2		60207	62178	62506	63642	62797	62266		58973	59984	57219	58583	56134	58178.6		51801	53535	48847	50490	52459	51426.4		46860	46210	47052	46444	46213	46555.8		39858	41526	40394	41601	42053	41086.4
1201	63924	66169	63256	64398	62919	64133.2		62172	62187	61492	64015	64255	62824.2		60447	62375	62766	63896	63018	62500.4		59201	60175	57453	58792	56337	58391.6		51972	53720	49029	50655	52667	51608.6		47016	46367	47190	46604	46367	46708.8		39995	41671	40521	41720	42208	41223
1202	64177	66438	63468	64616	63146	64369		62423	62423	61724	64248	64467	63057		60664	62613	63016	64123	63251	62733.4		59387	60366	57669	59009	56519	58590		52172	53921	49193	50826	52856	51793.6		47146	46550	47341	46760	46529	46865.2		40119	41817	40668	41867	42351	41364.4
1203	64408	66673	63689	64866	63378	64602.8		62687	62636	61923	64477	64692	63283		60863	62846	63247	64370	63470	62959.2		59613	60570	57859	59197	56724	58792.6		52344	54126	49357	51010	53047	51976.8		47328	46725	47526	46892	46699	47034		40256	41968	40793	42002	42496	41503
1204	64625	66890	63966	65117	63588	64837.2		62910	62887	62162	64693	64963	63523		61065	63093	63492	64600	63682	63186.4		59828	60778	58073	59391	56921	58998.2		52518	54336	49535	51192	53225	52161.2		47486	46895	47676	47066	46837	47192		40389	42130	40939	42144	42636	41647.6
1205	64854	67133	64193	65342	63835	65071.4		63137	63111	62386	64943	65211	63757.6		61286	63306	63711	64815	63924	63408.4		60053	61003	58286	59576	57125	59208.6		52714	54521	49698	51379	53407	52343.8		47661	47060	47837	47220	46998	47355.2		40544	42270	41080	42277	42778	41789.8
1206	65117	67394	64429	65574	64077	65318.2		63363	63338	62635	65213	65462	64002.2		61505	63581	63933	65057	64152	63645.6		60266	61225	58483	59789	57332	59419		52882	54745	49857	51559	53602	52529		47821	47237	48008	47405	47174	47529		40688	42432	41234	42432	42907	41938.6
1207	65338	67646	64666	65864	64320	65566.8		63631	63581	62865	65436	65728	64248.2		61729	63801	64162	65288	64383	63872.6		60512	61436	58661	60006	57525	59628		53077	54929	50049	51729	53782	52713.2		47993	47393	48198	47585	47334	47700.6		40839	42580	41373	42584	43063	42087.8
1208	65581	67914	64906	66124	64569	65818.8		63866	63806	63080	65678	65960	64478		61946	64025	64434	65549	64599	64110.6		60724	61628	58847	60230	57720	59829.8		53278	55141	50213	51924	53972	52905.6		48161	47559	48383	47758	47500	47872.2		40985	42731	41504	42721	43201	42228.4
1209	65819	68154	65125	66364	64822	66056.8		64121	64026	63290	65929	66213	64715.8		62142	64245	64677	65780	64826	64334		60955	61844	59067	60455	57937	60051.6		53480	55328	50388	52096	54145	53087.4		48343	47730	48548	47898	47646	48033		41116	42893	41613	42878	43354	42370.8
1210	66059	68423	65387	66603	65054	66305.2		64374	64267	63505	66185	66466	64959.4		62391	64471	64934	66025	65066	64577.4		61169	62057	59288	60688	58138	60268		53667	55502	50541	52288	54312	53262		48546	47904	48729	48049	47796	48204.8		41251	43048	41734	43019	43519	42514.2
1211	66296	68695	65627	66838	65290	66549.2		64607	64478	63749	66406	66745	65197		62643	64706	65182	66253	65297	64816.2		61389	62288	59487	60925	58337	60485.2		53858	55705	50720	52463	54518	53452.8		48724	48070	48892	48230	47983	48379.8		41413	43178	41882	43187	43659	42663.8
1212	66544	68961	65892	67076	65555	66805.6		64857	64718	63934	66675	67010	65438.8		62862	64947	65401	66495	65523	65045.6		61599	62499	59705	61166	58578	60709.4		54046	55908	50898	52661	54711	53644.8		48914	48238	49086	48412	48138	48557.6		41549	43342	42007	43340	43787	42805
1213	66797	69222	66133	67335	65813	67060		65096	64966	64158	66907	67280	65681.4		63074	65174	65645	66728	65743	65272.8		61846	62714	59951	61391	58794	60939.2		54231	56113	51091	52853	54910	53839.6		49096	48399	49266	48570	48329	48732		41675	43491	42160	43467	43943	42947.2
1214	67053	69456	66400	67582	66065	67311.2		65360	65204	64405	67169	67506	65928.8		63295	65403	65863	66967	65984	65502.4		62084	62934	60133	61600	59030	61156.2		54444	56303	51266	53033	55093	54027.8		49259	48562	49420	48745	48508	48898.8		41825	43647	42291	43612	44078	43090.6
1215	67326	69707	66664	67834	66315	67569.2		65576	65462	64645	67402	67740	66165		63511	65623	66095	67211	66190	65726		62306	63153	60370	61831	59247	61381.4		54638	56526	51416	53220	55308	54221.6		49424	48722	49594	48883	48684	49061.4		41974	43816	42444	43762	44218	43242.8
1216	67579	69963	66880	68083	66582	67817.4		65825	65711	64903	67660	67989	66417.6		63764	65835	66330	67465	66438	65966.4		62524	63363	60581	62038	59461	61593.4		54825	56733	51586	53441	55517	54420.4		49605	48875	49747	49050	48898	49235		42131	43935	42591	43889	44356	43380.4
1217	67847	70243	67101	68352	66820	68072.6		66042	65949	65182	67911	68245	66665.8		64006	66101	66551	67695	66686	66207.8		62739	63581	60791	62246	59681	61807.6		55005	56947	51777	53624	55741	54618.8		49766	49048	49905	49213	49065	49399.4		42265	44082	42739	44021	44480	43517.4
1218	68110	70491	67350	68632	67081	68332.8		66264	66196	65393	68149	68522	66904.8		64248	66344	66820	67945	66951	66461.6		62972	63800	61002	62453	59909	62027.2		55208	57127	51945	53797	55933	54802		49932	49227	50090	49371	49236	49571.2		42412	44231	42904	44167	44629	43668.6
1219	68364	70748	67629	68885	67304	68586		66508	66402	65613	68382	68766	67134.2		64493	66576	67066	68212	67198	66709		63228	64016	61219	62681	60093	62247.4		55428	57332	52168	53981	56117	55005.2		50112	49404	50264	49540	49382	49740.4		42530	44396	43028	44328	44788	43814
1220	68602	71006	67859	69124	67532	68824.6		66746	66656	65889	68614	69015	67384		64739	66814	67292	68458	67412	66943		63433	64253	61425	62919	60297	62465.4		55623	57524	52351	54193	56302	55198.6		50293	49589	50455	49692	49555	49916.8		42674	44571	43199	44478	44939	43972.2
1221	68843	71277	68098	69342	67794	69070.8		66999	66933	66116	68868	69256	67634.4		64974	67051	67549	68672	67658	67180.8		63669	64526	61655	63123	60496	62693.8		55823	57737	52558	54380	56504	55400.4		50478	49750	50626	49852	49738	50088.8		42814	44730	43321	44622	45103	44118
1222	69128	71536	68355	69615	68032	69333.2		67247	67204	66348	69114	69492	67881		65204	67283	67798	68914	67924	67424.6		63902	64735	61890	63369	60711	62921.4		55998	57949	52750	54577	56709	55596.6		50650	49923	50774	50038	49896	50256.2		42940	44907	43473	44770	45251	44268.2
1223	69397	71792	68592	69855	68286	69584.4		67497	67452	66595	69357	69771	68134.4		65432	67514	68042	69156	68185	67665.8		64128	64965	62115	63631	60928	63153.4		56203	58161	52925	54775	56917	55796.2		50830	50120	50957	50206	50061	50434.8		43083	45054	43623	44895	45402	44411.4
1224	69654	72061	68849	70123	68524	69842.2		67760	67689	66865	69594	70020	68385.6		65700	67762	68298	69421	68450	67926.2		64355	65231	62357	63885	61154	63396.4		56391	58380	53102	54957	57134	55992.8		51014	50305	51140	50404	50238	50620.2		43221	45210	43766	45064	45553	44562.8
1225	69934	72325	69097	70345	68774	70095		67999	67957	67128	69845	70259	68637.6		65927	67981	68550	69676	68714	68169.6		64597	65463	62582	64132	61342	63623.2		56562	58602	53280	55152	57332	56185.6		51191	50468	51333	50596	50400	50797.6		43350	45368	43926	45222	45693	44711.8
1226	70181	72595	69369	70569	69037	70350.2		68226	68202	67366	70091	70510	68879		66164	68214	68775	69920	68964	68407.4		64832	65735	62798	64387	61547	63859.8		56758	58835	53466	55350	57532	56388.2		51379	50662	51507	50786	50578	50982.4		43458	45513	44058	45384	45825	44847.6
1227	70435	72850	69612	70845	69299	70608.2		68486	68434	67591	70335	70774	69124		66405	68445	69035	70175	69192	68650.4		65059	65960	63032	64628	61777	64091.2		56944	59036	53643	55559	57738	56584		51556	50858	51709	50962	50756	51168.2		43595	45670	44215	45546	45972	44999.6
1228	70698	73104	69878	71096	69554	70866		68778	68667	67847	70595	71031	69383.6		66623	68664	69278	70408	69466	68887.8		65294	66203	63254	64861	61971	64316.6		57132	59253	53853	55746	57956	56788		51732	51017	51894	51140	50920	51340.6		43756	45826	44362	45709	46115	45153.6
1229	70955	73372	70107	71381	69813	71125.6		69047	68928	68091	70864	71285	69643		66826	68918	69525	70676	69722	69133.4		65503	66434	63481	65099	62189	64541.2		57329	59492	54024	55977	58157	56995.8		51914	51188	52049	51330	51085	51513.2		43923	45986	44496	45854	46271	45306
1230	71228	73632	70354	71630	70051	71379		69296	69207	68351	71127	71591	69914.4		67097	69164	69787	70918	69946	69382.4		65733	66697	63727	65340	62421	64783.6		57521	59684	54224	56174	58373	57195.2		52089	51368	52234	51524	51238	51690.6		44068	46147	44645	45999	46413	45454.4
1231	71468	73917	70592	71880	70296	71630.6		69516	69449	68608	71367	71868	70161.6		67348	69424	70034	71190	70217	69642.6		65971	66963	63955	65557	62643	65017.8		57709	59895	54423	56382	58563	57394.4		52300	51544	52409	51717	51440	51882		44193	46336	44791	46144	46592	45611.2
1232	71710	74190	70828	72172	70567	71893.4		69742	69698	68893	71646	72148	70425.4		67606	69684	70262	71441	70488	69896.2		66219	67211	64191	65765	62900	65257.2		57906	60103	54615	56610	58745	57595.8		52463	51731	52601	51905	51615	52063		44387	46513	44944	46295	46734	45774.6
1233	72007	74488	71052	72480	70848	72175		69996	69936	69124	71910	72411	70675.4		67826	69923	70551	71705	70763	70153.6		66468	67456	64456	65988	63124	65498.4		58133	60320	54798	56813	58939	57800.6		52621	51899	52759	52067	51820	52233.2		44544	46665	45110	46466	46897	45936.4
1234	72287	74745	71334	72756	71113	72447		70230	70193	69347	72177	72693	70928		68073	70170	70802	71989	71035	70413.8		66700	67715	64695	66230	63372	65742.4		58338	60534	54994	57016	59151	58006.6		52796	52082	52948	52252	52015	52418.6		44705	46822	45257	46634	47066	46096.8
1235	72569	75018	71585	73037	71378	72717.4		70500	70429	69617	72427	72996	71193.8		68323	70400	71063	72238	71287	70662.2		66935	67978	64919	66487	63615	65986.8		58537	60735	55169	57209	59339	58197.8		52984	52271	53152	52462	52190	52611.8		44851	46990	45402	46782	47225	46250
1236	72825	75329	71850	73343	71597	72988.8		70768	70711	69877	72688	73287	71466.2		68556	70661	71338	72500	71556	70922.2		67203	68231	65149	66706	63832	66224.2		58725	60935	55342	57424	59532	58391.6		53183	52467	53343	52620	52369	52796.4		45001	47167	45543	46928	47385	46404.8
1237	73068	75600	72115	73633	71874	73258		71023	70987	70144	72969	73581	71740.8		68773	70903	71579	72761	71821	71167.4		67434	68462	65378	66949	64052	66455		58935	61141	55525	57632	59782	58603		53384	52637	53544	52798	52544	52981.4		45146	47331	45705	47086	47535	46560.6
1238	73340	75892	72389	73897	72137	73531		71284	71240	70402	73233	73854	72002.6		69007	71155	71852	73035	72084	71426.6		67668	68732	65624	67198	64289	66702.2		59133	61368	55717	57848	59985	58810.2		53593	52842	53722	52983	52738	53175.6		45294	47502	45847	47264	47706	46722.6
1239	73625	76168	72689	74169	72412	73812.6		71532	71520	70682	73484	74114	72266.4		69256	71399	72103	73280	72323	71672.2		67923	68974	65837	67454	64526	66942.8		59351	61571	55910	58055	60203	59018		53786	53033	53864	53153	52907	53348.6		45469	47672	45983	47431	47878	46886.6
1240	73928	76430	72985	74443	72677	74092.6		71791	71804	70923	73768	74383	72533.8		69484	71641	72405	73519	72593	71928.4		68193	69245	66098	67682	64740	67191.6		59560	61802	56096	58244	60426	59225.6		53991	53236	54053	53346	53089	53543		45634	47841	46143	47581	48041	47048
1241	74180	76710	73226	74705	72920	74348.2		72049	72079	71181	74051	74674	72806.8		69740	71880	72642	73781	72826	72173.8		68392	69512	66346	67924	64991	67433		59785	62057	56308	58454	60639	59448.6		54206	53432	54261	53511	53255	53733		45803	48035	46295	47750	48194	47215.4
1242	74456	76987	73490	74988	73190	74622.2		72298	72363	71433	74303	74939	73067.2		69979	72132	72910	74057	73089	72433.4		68616	69774	66587	68170	65209	67671.2		60004	62281	56502	58666	60852	59661		54387	53594	54443	53704	53446	53914.8		45956	48206	46444	47910	48340	47371.2
1243	74709	77250	73732	75261	73463	74883		72566	72619	71683	74577	75245	73338		70218	72377	73177	74302	73369	72688.6		68868	69994	66836	68428	65431	67911.4		60216	62457	56684	58883	61083	59864.6		54580	53768	54641	53920	53625	54106.8		46096	48343	46602	48065	48497	47520.6
1244	74986	77541	74026	75538	73734	75165		72842	72894	71943	74866	75544	73617.8		70457	72634	73397	74539	73648	72935		69093	70272	67052	68670	65643	68146		60432	62658	56890	59090	61297	60073.4		54787	53953	54845	54088	53806	54295.8		46251	48502	46755	48231	48675	47682.8
1245	75268	77835	74269	75800	73968	75428		73086	73161	72226	75159	75824	73891.2		70732	72892	73656	74810	73922	73202.4		69339	70524	67278	68931	65883	68391		60615	62861	57079	59295	61500	60270		55000	54147	55030	54287	54001	54493		46434	48658	46912	48370	48857	47846.2
1246	75548	78153	74548	76078	74244	75714.2		73378	73417	72502	75415	76114	74165.2		70953	73164	73923	75064	74191	73459		69618	70768	67551	69186	66088	68642.2		60845	63108	57276	59487	61721	60487.4		55174	54347	55232	54459	54192	54680.8		46608	48824	47080	48547	49042	48020.2
1247	75825	78450	74821	76344	74525	75993		73615	73650	72809	75705	76390	74433.8		71204	73437	74198	75279	74462	73716		69881	71018	67799	69445	66345	68897.6		61037	63370	57470	59716	61929	60704.4		55362	54553	55440	54676	54373	54880.8		46770	48962	47230	48709	49190	48172.2
1248	76110	78715	75094	76616	74808	76268.6		73844	73920	73058	75932	76659	74682.6		71438	73695	74458	75538	74699	73965.6		70120	71262	68041	69718	66591	69146.4		61253	63609	57660	59904	62154	60916		55570	54751	55634	54872	54558	55077		46922	49104	47372	48871	49379	48329.6
1249	76403	78970	75348	76888	75092	76540.2		74119	74201	73319	76199	76936	74954.8		71690	73947	74718	75812	74987	74230.8		70363	71531	68293	69953	66817	69391.4		61505	63845	57877	60106	62359	61138.4		55757	54954	55852	55045	54751	55271.8		47087	49270	47524	49035	49526	48488.4
1250	76676	79242	75625	77153	75368	76812.8		74412	74476	73578	76549	77208	75244.6		71931	74236	74968	76072	75251	74491.6		70632	71753	68526	70176	67046	69626.6		61701	64071	58099	60318	62579	61353.6		55956	55106	56046	55243	54946	55459.4		47239	49431	47692	49200	49692	48650.8
1251	76934	79518	75918	77409	75659	77087.6		74715	74735	73855	76804	77495	75520.8		72188	74453	75209	76335	75518	74740.6		70898	72027	68744	70456	67320	69889		61945	64304	58294	60530	62796	61573.8		56145	55287	56230	55413	55122	55639.4		47414	49582	47835	49354	49867	48810.4
1252	77221	79844	76190	77686	75953	77378.8		74972	75018	74119	77132	77783	75804.8		72435	74721	75471	76592	75761	74996		71149	72287	69002	70722	67573	70146.6		62173	64542	58506	60759	63038	61803.6		56335	55485	56435	55595	55304	55830.8		47577	49746	47984	49519	50025	48970.2
1253	77495	80138	76491	77946	76214	77656.8		75242	75310	74391	77422	78070	76087		72680	75002	75738	76832	76029	75256.2		71423	72557	69256	70979	67827	70408.4		62411	64762	58752	60954	63249	62025.6		56538	55661	56620	55804	55504	56025.4		47731	49911	48120	49700	50187	49129.8
1254	77778	80425	76763	78248	76529	77948.6		75527	75562	74691	77690	78380	76370		72953	75275	76004	77086	76312	75526		71699	72838	69493	71228	68076	70666.8		62636	64979	58927	61173	63454	62233.8		56755	55850	56826	55996	55712	56227.8		47926	50073	48290	49874	50351	49302.8
1255	78096	80729	77044	78550	76787	78241.2		75809	75843	74959	77973	78649	76646.6		73189	75537	76287	77348	76567	75785.6		71939	73116	69750	71470	68328	70920.6		62844	65203	59149	61403	63655	62450.8		56960	56018	57021	56195	55930	56424.8		48076	50257	48464	50043	50532	49474.4
1256	78380	81059	77338	78836	77064	78535.4		76115	76122	75237	78257	78945	76935.2		73455	75811	76572	77631	76850	76063.8		72206	73362	70016	71711	68601	71179.2		63087	65419	59354	61629	63876	62673		57169	56219	57227	56374	56123	56622.4		48257	50403	48634	50235	50712	49648.2
1257	78663	81350	77643	79115	77348	78823.8		76385	76396	75513	78535	79206	77207		73727	76103	76836	77916	77151	76346.6		72442	73616	70267	71959	68839	71424.6		63283	65650	59531	61832	64100	62879.2		57358	56397	57441	56584	56316	56819.2		48410	50605	48780	50418	50883	49819.2
1258	78957	81679	77928	79400	77652	79123.2		76634	76676	75792	78821	79480	77480.6		73971	76399	77107	78194	77439	76622		72692	73862	70535	72215	69075	71675.8		63517	65891	59755	62065	64344	63114.4		57580	56580	57648	56785	56496	57017.8		48578	50759	48958	50600	51077	49994.4
1259	79243	82018	78212	79693	77914	79416		76916	76972	76073	79100	79771	77766.4		74230	76700	77383	78461	77734	76901.6		72948	74122	70769	72497	69297	71926.6		63754	66103	59987	62294	64558	63339.2		57776	56768	57855	56989	56692	57216		48746	50923	49142	50775	51236	50164.4
1260	79522	82366	78458	79976	78213	79707		77191	77252	76335	79386	80037	78040.2		74461	76992	77669	78724	77993	77167.8		73196	74386	71027	72753	69549	72182.2		63982	66311	60163	62502	64785	63548.6		57963	56938	58025	57185	56898	57401.8		48935	51114	49316	50940	51395	50340
1261	79761	82678	78764	80296	78509	80001.6		77482	77513	76624	79704	80276	78319.8		74706	77259	77944	79009	78269	77437.4		73435	74634	71319	73028	69837	72450.6		64193	66535	60359	62715	65011	63762.6		58183	57150	58237	57384	57100	57610.8		49093	51280	49513	51109	51600	50519
1262	80074	82997	79044	80607	78805	80305.4		77754	77801	76879	79996	80529	78591.8		74960	77529	78223	79273	78529	77702.8		73707	74912	71618	73306	70089	72726.4		64416	66739	60556	62946	65267	63984.8		58385	57361	58441	57602	57311	57820		49273	51444	49656	51308	51776	50691.4
1263	80375	83276	79373	80905	79077	80601.2		78026	78068	77153	80332	80827	78881.2		75229	77814	78508	79569	78829	77989.8		73972	75183	71863	73578	70351	72989.4		64647	66979	60761	63169	65533	64217.8		58582	57558	58658	57797	57540	58027		49431	51638	49832	51504	51956	50872.2
1264	80683	83576	79628	81210	79353	80890		78296	78354	77438	80631	81105	79164.8		75505	78143	78771	79887	79113	78283.8		74247	75437	72105	73822	70591	73240.4		64849	67170	60990	63383	65778	64434		58791	57769	58864	58021	57750	58239		49610	51828	50019	51668	52109	51046.8
1265	80976	83861	79925	81482	79638	81176.4		78615	78647	77718	80931	81401	79462.4		75754	78432	79060	80149	79398	78558.6		74504	75691	72366	74103	70860	73504.8		65070	67429	61215	63615	65988	64663.4		58971	57964	59067	58212	57966	58436		49786	51990	50191	51838	52293	51219.6
1266	81250	84175	80246	81747	79964	81476.4		78929	78925	78018	81227	81681	79756		76015	78691	79341	80416	79699	78832.4		74749	75975	72646	74368	71106	73768.8		65309	67681	61448	63870	66207	64903		59180	58145	59288	58408	58157	58635.6		49953	52175	50351	52023	52461	51392.6
1267	81572	84511	80568	82034	80235	81784		79211	79221	78278	81550	82008	80053.6		76265	78947	79614	80729	79980	79107		75015	76226	72893	74634	71376	74028.8		65540	67913	61668	64079	66449	65129.8		59381	58359	59480	58612	58377	58841.8		50146	52359	50542	52161	52649	51571.4
1268	81871	84893	80858	82331	80535	82097.6		79482	79520	78607	81843	82295	80349.4		76578	79237	79925	81009	80257	79401.2		75262	76489	73154	74918	71621	74288.8		65721	68156	61873	64334	66671	65351		59595	58575	59701	58808	58576	59051		50310	52523	50739	52339	52815	51745.2
1269	82190	85181	81179	82669	80843	82412.4		79724	79801	78887	82140	82583	80627		76868	79547	80241	81305	80540	79700.2		75537	76766	73440	75190	71860	74558.6		65960	68398	62087	64552	66898	65579		59779	58802	59891	59010	58793	59255		50482	52691	50896	52502	52996	51913.4
1270	82487	85482	81476	83014	81122	82716.2		80017	80112	79212	82462	82881	80936.8		77150	79822	80525	81595	80839	79986.2		75803	77030	73720	75457	72125	74827		66179	68647	62309	64781	67125	65808.2		60004	58984	60116	59230	59026	59472		50640	52848	51056	52677	53169	52078
1271	82790	85781	81810	83331	81457	83033.8		80323	80416	79490	82758	83164	81230.2		77409	80082	80796	81881	81113	80256.2		76054	77302	73956	75714	72368	75078.8		66440	68870	62533	65016	67397	66051.2		60195	59203	60338	59454	59230	59684		50796	53016	51239	52845	53345	52248.2
1272	83083	86089	82095	83657	81752	83335.2		80636	80707	79771	83092	83464	81534		77665	80358	81103	82171	81401	80539.6		76322	77580	74201	75999	72659	75352.2		66661	69093	62752	65222	67642	66274		60392	59413	60554	59651	59461	59894.2		50997	53185	51387	53053	53498	52424
1273	83380	86415	82419	83949	82040	83640.6		80955	81008	80046	83422	83778	81841.8		77977	80635	81369	82464	81664	80821.8		76605	77868	74485	76209	72942	75621.8		66908	69324	62983	65475	67877	66513.4		60583	59612	60770	59855	59667	60097.4		51164	53356	51554	53250	53671	52599
1274	83664	86696	82751	84236	82316	83932.6		81221	81292	80334	83741	84074	82132.4		78227	80932	81669	82769	81976	81114.6		76846	78129	74760	76474	73192	75880.2		67113	69571	63186	65692	68129	66738.2		60790	59823	60975	60042	59886	60303.2		51331	53545	51750	53436	53858	52784
1275	83973	87038	83045	84545	82637	84247.6		81516	81573	80651	84060	84407	82441.4		78480	81214	81972	83074	82284	81404.8		77105	78389	75028	76717	73435	76134.8		67361	69798	63396	65915	68380	66970		61001	60043	61177	60258	60099	60515.6		51519	53718	51943	53607	54042	52965.8
1276	84304	87363	83382	84858	82935	84568.4		81828	81859	80967	84385	84713	82750.4		78762	81501	82277	83387	82603	81706		77407	78660	75277	76942	73682	76393.6		67590	70062	63630	66142	68613	67207.4		61194	60235	61383	60488	60312	60722.4		51707	53895	52125	53793	54239	53151.8
1277	84573	87686	83708	85169	83247	84876.6		82126	82176	81285	84731	85026	83068.8		79046	81792	82569	83659	82865	81986.2		77700	78927	75580	77216	73945	76673.6		67829	70332	63855	66382	68857	67451		61406	60426	61614	60674	60534	60930.8		51866	54059	52321	53957	54403	53321.2
1278	84888	88008	84020	85464	83549	85185.8		82398	82483	81591	85048	85357	83375.4		79339	82100	82870	83943	83177	82285.8		77972	79199	75819	77481	74179	76930		68071	70598	64092	66607	69086	67690.8		61646	60642	61849	60877	60747	61152.2		52019	54231	52521	54120	54597	53497.6
1279	85205	88366	84321	85779	83890	85512.2		82696	82796	81891	85318	85670	83674.2		79616	82419	83165	84238	83503	82588.2		78249	79473	76081	77757	74468	77205.6		68304	70855	64334	66845	69306	67928.8		61895	60859	62056	61093	60959	61372.4		52149	54428	52684	54276	54799	53667.2
1280	85501	88704	84638	86070	84213	85825.2		82996	83103	82178	85630	85973	83976		79898	82724	83463	84537	83811	82886.6		78521	79752	76381	78044	74743	77488.2		68545	71105	64567	67068	69563	68169.6		62097	61067	62263	61290	61179	61579.2		52310	54601	52859	54460	55016	53849.2
1281	85831	89059	84967	86376	84488	86144.2		83277	83412	82460	85927	86238	84262.8		80185	83029	83739	84818	84137	83181.6		78790	80015	76618	78288	75004	77743		68765	71365	64828	67317	69801	68415.2		62305	61279	62473	61520	61386	61792.6		52491	54785	53010	54637	55177	54020
1282	86178	89357	85284	86734	84814	86473.4		83599	83738	82786	86243	86549	84583		80486	83330	84038	85129	84437	83484		79040	80274	76892	78591	75275	78014.4		69006	71595	65043	67526	70035	68641		62544	61509	62697	61741	61593	62016.8		52672	54986	53200	54836	55381	54215
1283	86491	89727	85634	87031	85108	86798.2		83920	84077	83107	86563	86879	84909.2		80779	83608	84339	85442	84764	83786.4		79305	80578	77162	78861	75549	78291		69247	71841	65255	67763	70289	68879		62763	61739	62922	61949	61806	62235.8		52873	55168	53403	55019	55549	54402.4
1284	86823	90064	85966	87359	85409	87124.2		84247	84359	83392	86875	87186	85211.8		81046	83916	84643	85725	85047	84075.4		79605	80849	77425	79106	75801	78557.2		69497	72090	65469	68009	70514	69115.8		62983	61976	63150	62144	62018	62454.2		53065	55352	53589	55218	55713	54587.4
1285	87158	90388	86256	87679	85729	87442		84530	84656	83693	87170	87493	85508.4		81336	84215	84914	85999	85328	84358.4		79879	81118	77666	79373	76050	78817.2		69781	72336	65690	68241	70793	69368.2		63244	62185	63390	62361	62213	62678.6		53256	55522	53772	55398	55906	54770.8
1286	87489	90709	86586	88044	86054	87776.4		84843	84976	83987	87444	87801	85810.2		81612	84509	85231	86308	85645	84661		80148	81387	77947	79666	76306	79090.8		70000	72623	65927	68491	71023	69612.8		63483	62412	63655	62567	62416	62906.6		53464	55709	53927	55587	56117	54960.8
1287	87820	91059	86884	88393	86377	88106.6		85148	85294	84302	87762	88124	86126		81926	84827	85540	86621	85959	84974.6		80438	81671	78219	79936	76593	79371.4		70250	72879	66154	68726	71276	69857		63710	62650	63887	62782	62647	63135.2		53635	55893	54095	55784	56300	55141.4
1288	88146	91411	87211	88737	86667	88434.4		85460	85587	84611	88062	88423	86428.6		82188	85128	85837	86932	86242	85265.4		80686	81944	78515	80219	76878	79648.4		70482	73112	66373	68945	71557	70093.8		63929	62853	64112	62999	62878	63354.2		53850	56099	54284	55982	56451	55333.2
1289	88449	91714	87543	89085	87001	88758.4		85763	85878	84916	88395	88747	86739.8		82485	85443	86147	87223	86543	85568.2		80965	82279	78812	80511	77177	79948.8		70744	73361	66591	69142	71799	70327.4		64136	63066	64348	63205	63109	63572.8		54033	56284	54453	56188	56649	55521.4
1290	88795	92051	87887	89410	87307	89090		86079	86191	85214	88722	89097	87060.6		82784	85751	86431	87530	86874	85874		81282	82547	79084	80781	77443	80227.4		70967	73629	66851	69395	72077	70583.8		64346	63276	64605	63423	63317	63793.4		54223	56448	54620	56361	56827	55695.8
1291	89135	92366	88211	89761	87640	89422.6		86361	86516	85508	89043	89404	87366.4		83104	86058	86740	87827	87150	86175.8		81526	82844	79351	81054	77709	80496.8		71200	73882	67110	69653	72315	70832		64575	63484	64822	63645	63523	64009.8		54429	56635	54802	56568	57032	55893.2
1292	89476	92744	88526	90094	87942	89756.4		86652	86796	85802	89347	89732	87665.8		83413	86351	87055	88183	87456	86491.6		81838	83131	79643	81364	78010	80797.2		71471	74132	67358	69891	72525	71075.4		64774	63716	65071	63890	63726	64235.4		54612	56840	54984	56765	57226	56085.4
1293	89828	93100	88846	90418	88270	90092.4		86953	87082	86103	89669	90092	87979.8		83729	86698	87371	88516	87771	86817		82109	83447	79933	81649	78288	81085.2		71751	74404	67604	70123	72779	71332.2		65005	63942	65293	64117	63956	64462.6		54795	57040	55169	56959	57403	56273.2
1294	90161	93438	89202	90720	88582	90420.6		87252	87405	86382	90011	90417	88293.4		84050	87025	87679	88843	88097	87138.8		82425	83772	80190	81974	78557	81383.6		72002	74631	67855	70372	73031	71578.2		65241	64174	65521	64334	64180	64690		54967	57254	55364	57193	57597	56475
1295	90506	93820	89533	91048	88945	90770.4		87553	87715	86689	90341	90760	88611.6		84358	87359	87981	89171	88437	87461.2		82701	84088	80483	82244	78828	81668.8		72275	74912	68091	70649	73318	71849		65467	64413	65718	64546	64392	64907.2		55154	57441	55565	57382	57802	56668.8
1296	90848	94181	89852	91347	89260	91097.6		87879	88079	87015	90686	91056	88943		84693	87725	88273	89478	88739	87781.6		82976	84389	80752	82531	79094	81948.4		72537	75171	68310	70927	73591	72107.2		65683	64642	65945	64783	64615	65133.6		55348	57646	55755	57587	58003	56867.8
1297	91206	94538	90171	91662	89590	91433.4		88175	88408	87318	91027	91363	89258.2		84964	88009	88584	89794	89036	88077.4		83282	84689	81029	82823	79350	82234.6		72797	75421	68560	71207	73820	72361		65887	64860	66169	65016	64844	65355.2		55556	57832	55927	57783	58197	57059
1298	91555	94924	90516	92011	89950	91791.2		88538	88708	87618	91353	91685	89580.4		85270	88327	88891	90108	89337	88386.6		83554	85003	81329	83118	79625	82525.8		73048	75701	68820	71458	74074	72620.2		66107	65078	66376	65233	65044	65567.6		55760	58017	56120	57980	58413	57258
1299	91892	95256	90856	92350	90293	92129.4		88876	89041	87961	91711	92019	89921.6		85563	88638	89205	90450	89663	88703.8		83871	85294	81592	83409	79894	82812		73313	75950	69096	71692	74349	72880		66361	65306	66600	65478	65251	65799.2		55935	58177	56295	58174	58603	57436.8
1300	92252	95614	91189	92717	90600	92474.4		89217	89385	88277	92048	92359	90257.2		85866	88979	89508	90752	89989	89018.8		84164	85593	81880	83698	80168	83100.6		73577	76208	69353	71933	74615	73137.2		66623	65528	66852	65715	65500	66043.6		56081	58365	56471	58356	58773	57609.2
1301	92581	95996	91545	93089	90941	92830.4		89546	89704	88622	92381	92732	90597		86164	89337	89830	91054	90326	89342.2		84505	85900	82192	83982	80443	83404.4		73820	76465	69625	72185	74879	73394.8		66872	65762	67100	65982	65750	66293.2		56269	58522	56662	58532	58962	57789.4
1302	92942	96359	91869	93419	91283	93174.4		89850	90035	88933	92721	93065	90920.8		86479	89645	90137	91379	90632	89654.4		84810	86179	82490	84293	80707	83695.8		74096	76729	69869	72439	75150	73656.6		67073	65967	67356	66200	65981	66515.4		56465	58724	56883	58726	59132	57986
1303	93322	96741	92202	93766	91648	93535.8		90160	90313	89250	93059	93393	91235		86777	89979	90464	91682	90940	89968.4		85096	86495	82767	84586	80967	83982.2		74393	77022	70077	72682	75385	73911.8		67319	66184	67581	66409	66200	66738.6		56669	58931	57061	58945	59320	58185.2
1304	93643	97089	92538	94120	91970	93872		90458	90647	89567	93333	93720	91545		87094	90295	90781	92023	91266	90291.8		85394	86791	83057	84851	81261	84270.8		74661	77298	70319	72946	75668	74178.4		67575	66409	67820	66640	66452	66979.2		56859	59142	57238	59132	59525	58379.2
1305	94028	97408	92857	94461	92302	94211.2		90779	90983	89873	93671	94034	91868		87405	90617	91096	92330	91624	90614.4		85658	87114	83361	85139	81571	84568.6		74955	77583	70555	73226	75921	74448		67819	66635	68073	66869	66716	67222.4		57036	59353	57451	59334	59705	58575.8
1306	94357	97719	93197	94802	92661	94547.2		91116	91321	90213	94017	94350	92203.4		87714	90920	91453	92670	91937	90938.8		85941	87388	83631	85426	81854	84848		75196	77854	70818	73473	76209	74710		68024	66886	68327	67103	66945	67457		57236	59523	57644	59553	59894	58770
1307	94688	98100	93574	95137	93013	94902.4		91441	91659	90520	94393	94691	92540.8		88058	91236	91769	92978	92271	91262.4		86230	87685	83917	85741	82154	85145.4		75464	78150	71039	73752	76438	74968.6		68238	67113	68563	67340	67153	67681.4		57432	59753	57828	59774	60105	58978.4
1308	95024	98477	93914	95476	93381	95254.4		91722	92024	90849	94738	94995	92865.6		88373	91580	92105	93306	92613	91595.4		86527	88014	84177	86060	82410	85437.6		75715	78435	71274	74004	76695	75224.6		68471	67340	68793	67560	67390	67910.8		57631	59955	58008	59979	60311	59176.8
1309	95403	98886	94258	95844	93750	95628.2		92033	92379	91155	95097	95348	93202.4		88694	91889	92428	93642	92936	91917.8		86875	88334	84464	86381	82696	85750		75960	78708	71540	74245	76958	75482.2		68715	67581	69047	67827	67618	68157.6		57815	60150	58206	60211	60516	59379.6
1310	95736	99285	94634	96218	94120	95998.6		92339	92739	91452	95444	95684	93531.6		89012	92199	92757	93957	93229	92230.8		87184	88672	84755	86675	82993	86055.8		76239	78977	71778	74497	77243	75746.8		68937	67813	69311	68043	67844	68389.6		58008	60374	58412	60396	60728	59583.6
1311	96097	99691	95001	96547	94483	96363.8		92658	93069	91761	95752	96035	93855		89352	92509	93089	94281	93546	92555.4		87511	89002	85052	86989	83260	86362.8		76491	79250	72020	74730	77493	75996.8		69204	68040	69541	68260	68098	68628.6		58191	60600	58613	60623	60925	59790.4
1312	96470	100035	95349	96904	94807	96713		93040	93428	92115	96112	96396	94218.2		89663	92838	93377	94614	93878	92874		87819	89351	85354	87282	83543	86669.8		76729	79548	72242	74973	77764	76251.2		69441	68267	69774	68498	68357	68867.4		58417	60807	58805	60821	61137	59997.4
1313	96875	100411	95698	97270	95161	97083		93344	93791	92466	96473	96736	94562		90001	93181	93682	94985	94218	93213.4		88127	89668	85658	87615	83837	86981		76994	79826	72478	75227	78012	76507.4		69700	68501	70008	68755	68597	69112.2		58617	60993	59015	61031	61346	60200.4
1314	97274	100800	96045	97623	95530	97454.4		93674	94116	92805	96822	97075	94898.4		90328	93539	94026	95334	94541	93553.6		88431	89990	85959	87917	84151	87289.6		77269	80119	72722	75497	78307	76782.8		69965	68729	70251	69000	68869	69362.8		58829	61220	59239	61248	61558	60418.8
1315	97622	101158	96409	97972	95892	97810.6		94056	94468	93152	97168	97412	95251.2		90634	93920	94383	95699	94875	93902.2		88757	90311	86230	88216	84460	87594.8		77557	80398	72979	75773	78622	77065.8		70203	68975	70501	69236	69104	69603.8		59037	61409	59441	61439	61768	60618.8
1316	97958	101518	96759	98327	96263	98165		94409	94795	93493	97533	97708	95587.6		90964	94265	94696	96027	95246	94239.6		89077	90629	86500	88525	84778	87901.8		77837	80671	73197	76027	78937	77333.8		70422	69225	70776	69465	69370	69851.6		59253	61620	59635	61633	61998	60827.8
1317	98267	101897	97144	98705	96629	98528.4		94785	95152	93824	97912	98052	95945		91301	94583	95040	96383	95568	94575		89379	90935	86806	88783	85087	88198		78116	80968	73468	76312	79242	77621.2		70679	69478	71028	69746	69623	70110.8		59480	61837	59834	61847	62197	61039
1318	98639	102263	97509	99076	96999	98897.2		95100	95500	94208	98256	98406	96294		91644	94935	95445	96726	95929	94935.8		89711	91244	87127	89087	85370	88507.8		78390	81276	73693	76557	79515	77886.2		70915	69703	71249	70003	69860	70346		59681	62058	60061	62061	62383	61248.8
1319	99016	102635	97856	99432	97359	99259.6		95459	95857	94539	98630	98748	96646.6		91966	95276	95768	97106	96277	95278.6		90018	91586	87447	89403	85669	88824.6		78671	81514	73937	76814	79796	78146.4		71159	69941	71484	70246	70125	70591		59859	62293	60247	62267	62605	61454.2
1320	99365	103012	98206	99784	97733	99620		95800	96207	94862	98998	99087	96990.8		92299	95615	96077	97471	96584	95609.2		90367	91922	87748	89684	85997	89143.6		78966	81783	74176	77073	80092	78418		71407	70152	71748	70518	70365	70838		60037	62514	60447	62459	62805	61652.4
1321	99729	103417	98583	100178	98126	100007		96130	96549	95200	99355	99452	97337.2		92605	95975	96426	97813	96941	95952		90652	92233	88065	90004	86264	89443.6		79251	82075	74448	77332	80368	78694.8		71650	70412	72026	70750	70633	71094.2		60258	62725	60655	62679	63017	61866.8
1322	100098	103828	98952	100557	98504	100388		96506	96900	95542	99712	99851	97702.2		92962	96312	96727	98147	97292	96288		90976	92580	88348	90269	86536	89741.8		79531	82335	74739	77615	80667	78977.4		71902	70666	72269	71011	70879	71345.4		60448	62963	60877	62910	63244	62088.4
1323	100470	104208	99340	100972	98853	100769		96896	97223	95892	100121	100215	98069.4		93288	96668	97049	98505	97654	96632.8		91289	92915	88649	90610	86839	90060.4		79794	82665	74993	77879	80965	79259.2		72147	70878	72533	71241	71116	71583		60658	63183	61097	63105	63444	62297.4
1324	100841	104603	99732	101367	99212	101151		97239	97589	96226	100477	100600	98426.2		93632	97015	97375	98889	97983	96978.8		91611	93210	88949	90950	87198	90383.6		80041	82951	75284	78134	81266	79535.2		72429	71153	72793	71481	71375	71846.2		60868	63402	61291	63322	63641	62504.8
1325	101221	104999	100139	101721	99552	101526		97633	97918	96579	100867	100959	98791.2		93957	97370	97743	99272	98355	97339.4		91928	93575	89290	91319	87508	90724		80335	83256	75536	78386	81547	79812		72668	71398	73039	71754	71654	72102.6		61047	63624	61487	63525	63868	62710.2
1326	101572	105423	100501	102114	99933	101909		97976	98259	96920	101238	101316	99141.8		94292	97764	98097	99636	98736	97705		92271	93906	89618	91640	87819	91050.8		80642	83551	75819	78631	81846	80097.8		72923	71642	73282	72003	71930	72356		61257	63823	61714	63742	64081	62923.4
1327	101974	105854	100858	102517	100276	102296		98329	98610	97282	101593	101686	99500		94623	98117	98462	100035	99121	98071.6		92594	94195	89927	91963	88142	91364.2		80908	83848	76071	78894	82107	80365.6		73182	71889	73534	72261	72200	72613.2		61488	64022	61933	63976	64275	63138.8
1328	102334	106240	101218	102936	100626	102671		98738	98978	97626	101991	102043	99875.2		94975	98468	98799	100417	99502	98432.2		92966	94512	90248	92289	88434	91689.8		81233	84161	76351	79190	82387	80664.4		73456	72142	73807	72478	72446	72865.8		61706	64244	62129	64191	64497	63353.4
1329	102690	106637	101595	103332	101003	103051		99095	99323	97982	102368	102408	100235		95328	98869	99151	100745	99860	98790.6		93307	94852	90574	92635	88751	92023.8		81508	84447	76636	79503	82663	80951.4		73703	72409	74081	72761	72697	73130.2		61902	64450	62349	64418	64725	63568.8
1330	103099	107025	101957	103711	101360	103430		99510	99700	98355	102734	102746	100609		95647	99222	99497	101091	100234	99138.2		93656	95198	90894	92944	89073	92353		81785	84754	76903	79763	82958	81232.6		73963	72646	74390	73010	72949	73391.6		62096	64684	62568	64652	64971	63794.2
1331	103495	107402	102321	104096	101743	103811		99898	100072	98725	103116	103094	100981		95982	99551	99826	101453	100570	99476.4		93987	95543	91180	93251	89436	92679.4		82096	85041	77165	80038	83293	81526.6		74239	72903	74645	73260	73188	73647		62311	64911	62775	64852	65165	64002.8
1332	103895	107804	102708	104506	102113	104205		100237	100455	99097	103473	103480	101348		96374	99924	100183	101870	100943	99858.8		94292	95888	91487	93576	89721	92992.8		82385	85322	77439	80350	83614	81822		74505	73160	74903	73533	73446	73909.4		62502	65139	62980	65088	65391	64220
1333	104269	108188	103125	104876	102480	104588		100601	100806	99472	103898	103847	101725		96747	100296	100535	102241	101312	100226		94661	96260	91808	93948	90069	93349.2		82699	85604	77707	80637	83935	82116.4		74759	73412	75166	73798	73702	74167.4		62701	65380	63194	65282	65619	64435.2
1334	104613	108561	103495	105297	102912	104976		100966	101181	99828	104270	104258	102101		97091	100637	100894	102630	101668	100584		94971	96625	92151	94272	90384	93680.6		83005	85930	77997	80911	84230	82414.6		75035	73702	75404	74069	73959	74433.8		62876	65576	63436	65506	65841	64647
1335	105015	108950	103891	105694	103304	105371		101333	101538	100194	104636	104655	102471		97416	100991	101254	103018	102066	100949		95338	96968	92454	94594	90686	94008		83300	86165	78290	81180	84549	82696.8		75296	73969	75671	74323	74220	74695.8		63062	65803	63652	65726	66060	64860.6
1336	105420	109353	104263	106101	103707	105769		101740	101912	100555	105012	105035	102851		97788	101355	101666	103386	102439	101327		95691	97324	92799	94947	91026	94357.4		83605	86463	78568	81434	84857	82985.4		75554	74211	75922	74591	74468	74949.2		63254	66036	63880	65923	66311	65080.8
1337	105788	109736	104632	106534	104095	106157		102093	102294	100925	105388	105431	103226		98169	101703	102017	103808	102781	101696		96073	97696	93134	95321	91336	94712		83894	86744	78852	81728	85168	83277.2		75802	74498	76201	74846	74700	75209.4		63474	66257	64125	66146	66526	65305.6
1338	106194	110145	105029	106957	104477	106560		102469	102674	101305	105773	105820	103608		98570	102039	102389	104188	103129	102063		96411	98035	93460	95690	91618	95042.8		84173	87068	79152	82007	85450	83570		76061	74743	76481	75108	74956	75469.8		63673	66477	64331	66339	66777	65519.4
1339	106631	110569	105439	107348	104889	106975		102830	103024	101670	106168	106239	103986		98954	102386	102757	104594	103492	102437		96778	98402	93800	96010	91942	95386.4		84498	87372	79426	82281	85749	83865.2		76317	74969	76746	75382	75206	75724		63875	66694	64570	66547	66978	65732.8
1340	107035	110989	105814	107790	105281	107382		103197	103373	102051	106545	106625	104358		99306	102785	103146	105009	103862	102822		97126	98748	94091	96373	92254	95718.4		84817	87703	79680	82573	86059	84166.4		76560	75236	76990	75653	75468	75981.4		64116	66910	64794	66785	67184	65957.8
1341	107409	111415	106218	108232	105681	107791		103546	103729	102415	106945	107000	104727		99695	103128	103528	105380	104272	103201		97456	99108	94427	96693	92584	96053.6		85109	87995	79966	82892	86402	84472.8		76811	75511	77217	75910	75705	76230.8		64317	67131	65034	67026	67389	66179.4
1342	107809	111838	106629	108657	106058	108198		103948	104129	102787	107354	107429	105129		100033	103513	103881	105759	104655	103568		97830	99469	94768	97044	92917	96405.6		85409	88320	80267	83170	86698	84772.8		77054	75789	77502	76208	75982	76507		64537	67370	65263	67251	67657	66415.6
1343	108223	112247	107023	109034	106421	108590		104343	104499	103189	107714	107835	105516		100383	103899	104255	106155	105028	103944		98146	99830	95091	97363	93248	96735.6		85733	88618	80562	83473	86993	85075.8		77308	76056	77797	76505	76285	76790.2		64742	67597	65459	67460	67890	66629.6
1344	108651	112668	107426	109469	106825	109008		104708	104882	103577	108097	108220	105897		100747	104292	104648	106540	105374	104320		98493	100194	95459	97711	93591	97089.6		86043	88949	80883	83745	87286	85381.2		77603	76326	78050	76756	76531	77053.2		64981	67849	65677	67679	68156	66868.4
1345	109029	113119	107801	109857	107252	109412		105101	105256	103970	108500	108620	106289		101114	104690	105056	106928	105745	104707		98868	100548	95775	98020	93927	97427.6		86375	89267	81174	84064	87613	85698.6		77913	76610	78322	77011	76807	77332.6		65207	68103	65901	67905	68387	67100.6
1346	109422	113519	108211	110263	107667	109816		105495	105657	104366	108902	109043	106693		101506	105100	105444	107332	106100	105096		99258	100894	96106	98393	94275	97785.2		86682	89599	81476	84344	87894	85999		78177	76883	78560	77298	77062	77596		65424	68328	66122	68125	68622	67324.2
1347	109833	113938	108622	110680	108048	110224		105914	106050	104743	109297	109439	107089		101895	105477	105833	107725	106471	105480		99589	101257	96474	98734	94592	98129.2		86982	89921	81765	84645	88201	86302.8		78437	77170	78838	77560	77353	77871.6		65624	68559	66377	68374	68854	67557.6
1348	110281	114343	109016	111135	108460	110647		106316	106428	105158	109695	109805	107480		102274	105840	106196	108131	106865	105861		99937	101656	96867	99090	94958	98501.6		87295	90216	82075	84934	88508	86605.6		78725	77434	79125	77799	77633	78143.2		65837	68773	66606	68594	69056	67773.2
1349	110721	114761	109411	111559	108854	111061		106702	106847	105529	110056	110239	107875		102675	106204	106570	108552	107236	106247		100288	102050	97209	99475	95305	98865.4		87585	90531	82355	85221	88795	86897.4		78978	77706	79382	78046	77930	78408.4		66077	69019	66830	68800	69296	68004.4
1350	111105	115201	109793	112002	109277	111476		107082	107228	105914	110394	110635	108251		103040	106608	106949	108940	107627	106633		100639	102441	97556	99836	95624	99219.2		87895	90860	82646	85541	89122	87212.8		79265	77967	79648	78322	78174	78675.2		66284	69222	67062	69027	69499	68218.8
1351	111526	115631	110188	112438	109636	111884		107517	107607	106343	110817	111021	108661		103430	106978	107341	109346	108025	107024		100971	102786	97874	100211	95972	99562.8		88198	91203	82925	85840	89417	87516.6		79528	78254	79898	78605	78426	78942.2		66493	69496	67278	69263	69763	68458.6
1352	111930	116014	110559	112840	110081	112285		107894	107986	106765	111211	111403	109052		103812	107341	107709	109765	108393	107404		101314	103152	98225	100576	96330	99919.4		88537	91520	83255	86145	89754	87842.2		79804	78531	80195	78897	78724	79230.2		66715	69726	67530	69517	69982	68694
1353	112323	116397	110986	113246	110462	112683		108311	108374	107125	111615	111821	109449		104183	107695	108114	110165	108801	107792		101682	103538	98591	100956	96673	100288		88849	91822	83559	86451	90058	88147.8		80053	78802	80485	79158	79008	79501.2		66911	69971	67764	69754	70231	68926.2
1354	112736	116833	111399	113658	110897	113105		108739	108783	107525	112030	112254	109866		104555	108067	108457	110573	109162	108163		102065	103922	98969	101347	97014	100663		89163	92179	83831	86776	90382	88466.2		80347	79103	80770	79457	79274	79790.2		67098	70192	68000	69965	70481	69147.2
1355	113200	117252	111831	114067	111328	113536		109122	109190	107926	112420	112670	110266		104950	108448	108856	110992	109551	108559		102450	104290	99329	101692	97353	101023		89493	92483	84150	87083	90730	88787.8		80592	79368	81055	79773	79544	80066.4		67320	70420	68227	70233	70722	69384.4
1356	113632	117683	112225	114509	111754	113961		109515	109610	108301	112820	113111	110671		105316	108839	109293	111451	109955	108971		102798	104665	99725	102085	97710	101397		89812	92774	84425	87385	91033	89085.8		80853	79642	81326	80067	79828	80343.2		67563	70691	68427	70467	70966	69622.8
1357	114039	118116	112618	114924	112153	114370		109905	110046	108699	113252	113570	111094		105691	109240	109670	111840	110361	109360		103189	105044	100087	102462	98093	101775		90157	93122	84746	87658	91346	89405.8		81165	79946	81613	80326	80078	80625.6		67796	70904	68660	70705	71209	69854.8
1358	114458	118527	113046	115401	112580	114802		110309	110427	109111	113669	113982	111500		106086	109632	110082	112234	110757	109758		103560	105374	100449	102869	98446	102140		90474	93456	85088	87921	91676	89723		81457	80264	81868	80641	80342	80914.4		68040	71155	68896	70942	71477	70102
1359	114889	118917	113424	115825	113000	115211		110750	110829	109516	114085	114370	111910		106445	110039	110460	112624	111137	110141		103926	105725	100811	103222	98843	102505		90810	93808	85384	88235	91990	90045.4		81760	80542	82172	80909	80619	81200.4		68279	71399	69129	71206	71723	70347.2
1360	115327	119332	113869	116239	113441	115642		111163	111207	109910	114489	114796	112313		106847	110476	110863	113011	111579	110555		104301	106113	101215	103597	99223	102890		91125	94187	85690	88528	92332	90372.4		82019	80834	82468	81200	80903	81484.8		68528	71664	69351	71414	71967	70584.8
1361	115760	119761	114338	116677	113903	116088		111562	111641	110280	114872	115277	112726		107197	110892	111261	113396	112028	110955		104708	106457	101553	103961	99561	103248		91470	94501	85966	88835	92675	90689.4		82318	81144	82750	81458	81168	81767.6		68753	71933	69604	71658	72213	70832.2
1362	116169	120248	114765	117087	114310	116516		111938	112018	110653	115267	115721	113119		107561	111317	111678	113808	112440	111361		105091	106844	101908	104357	99913	103623		91767	94843	86280	89124	92969	90996.6		82592	81436	83047	81732	81445	82050.4		68976	72211	69892	71912	72427	71083.6
1363	116582	120697	115217	117533	114697	116945		112319	112409	111030	115678	116168	113521		107950	111717	112083	114228	112817	111759		105465	107265	102304	104765	100275	104015		92099	95175	86583	89413	93269	91307.8		82884	81740	83388	82022	81757	82358.2		69203	72470	70130	72203	72691	71339.4
1364	117030	121167	115662	117946	115110	117383		112734	112850	111423	116060	116591	113932		108343	112139	112494	114657	113212	112169		105833	107605	102694	105127	100643	104380		92426	95521	86878	89744	93612	91636.2		83179	82024	83668	82334	82028	82646.6		69462	72717	70407	72485	72946	71603.4
1365	117470	121654	116071	118386	115508	117818		113165	113275	111835	116484	117001	114352		108731	112581	112909	115095	113615	112586		106249	107991	103093	105511	101005	104770		92732	95831	87179	90069	93916	91945.4		83490	82327	83968	82620	82346	82950.2		69719	72987	70644	72732	73187	71853.8
1366	117896	122073	116499	118866	115958	118258		113599	113687	112236	116898	117417	114767		109175	112971	113346	115530	113998	113004		106599	108358	103425	105879	101369	105126		93056	96159	87442	90380	94225	92252.4		83781	82630	84255	82906	82645	83243.4		69937	73215	70909	72957	73444	72092.4
1367	118303	122528	116938	119321	116401	118698		114016	114075	112615	117311	117858	115175		109550	113397	113774	115954	114428	113421		106991	108785	103807	106259	101739	105516		93380	96532	87735	90738	94558	92588.6		84071	82915	84556	83192	82910	83528.8		70166	73455	71136	73223	73663	72328.6
1368	118775	122972	117409	119791	116838	119157		114426	114464	113042	117749	118315	115599		109941	113801	114209	116382	114865	113840		107397	109180	104185	106663	102094	105904		93689	96857	88059	91055	94874	92906.8		84366	83185	84828	83478	83194	83810.2		70417	73721	71403	73495	73946	72596.4
1369	119229	123415	117811	120246	117268	119594		114850	114888	113465	118165	118754	116024		110345	114203	114606	116788	115296	114248		107791	109576	104588	107078	102465	106300		93991	97181	88376	91386	95207	93228.2		84656	83507	85155	83785	83482	84117		70644	73989	71677	73735	74234	72855.8
1370	119675	123818	118208	120671	117731	120021		115278	115313	113844	118566	119209	116442		110749	114632	115019	117199	115694	114659		108186	109968	104976	107458	102797	106677		94283	97514	88684	91686	95523	93538		84966	83795	85457	84078	83732	84405.6		70901	74272	71918	73993	74492	73115.2
1371	120107	124243	118585	121109	118174	120444		115698	115695	114209	118999	119683	116857		111141	115030	115451	117606	116118	115069		108556	110371	105400	107835	103145	107061		94615	97853	89015	91992	95852	93865.4		85237	84090	85735	84362	84040	84692.8		71140	74523	72142	74236	74707	73349.6
1372	120575	124684	118968	121557	118610	120879		116119	116147	114624	119449	120122	117292		111515	115483	115911	118110	116519	115508		108945	110754	105796	108237	103547	107456		94966	98211	89316	92324	96196	94202.6		85537	84392	86029	84688	84349	84999		71373	74763	72375	74488	74957	73591.2
1373	121015	125181	119424	122037	119039	121339		116512	116551	115080	119887	120559	117718		111973	115902	116364	118543	116930	115942		109311	111131	106153	108637	103908	107828		95290	98543	89607	92630	96570	94528		85815	84654	86303	84967	84649	85277.6		71606	75025	72646	74736	75233	73849.2
1374	121486	125618	119872	122439	119465	121776		116947	117006	115542	120283	120988	118153		112374	116332	116742	118953	117333	116347		109694	111479	106527	108993	104275	108194		95611	98886	89932	92946	96925	94860		86126	84955	86596	85271	84931	85575.8		71831	75277	72886	74981	75499	74094.8
1375	121993	126084	120323	122891	119927	122244		117377	117447	115978	120759	121435	118599		112816	116739	117195	119399	117749	116780		110113	111878	106921	109370	104638	108584		95931	99239	90237	93279	97234	95184		86413	85264	86916	85549	85202	85868.8		72092	75512	73134	75220	75773	74346.2
1376	122457	126549	120789	123315	120345	122691		117793	117839	116394	121186	121842	119011		113270	117189	117666	119844	118159	117226		110462	112238	107338	109748	105010	108959		96288	99601	90544	93590	97579	95520.4		86736	85586	87189	85871	85497	86175.8		72347	75754	73383	75491	76013	74597.6
1377	122909	127096	121248	123788	120827	123174		118225	118273	116853	121606	122324	119456		113695	117598	118084	120294	118638	117662		110867	112621	107736	110146	105379	109350		96638	99954	90855	93916	97933	95859.2		87056	85858	87487	86169	85819	86477.8		72590	76017	73650	75746	76290	74858.6
1378	123365	127607	121727	124272	121293	123653		118648	118689	117224	122012	122766	119868		114114	118004	118529	120733	119059	118088		111290	112989	108134	110535	105736	109737		97006	100299	91174	94240	98290	96201.8		87359	86157	87760	86489	86106	86774.2		72854	76277	73868	76018	76519	75107.2
1379	123809	128059	122163	124749	121730	124102		119115	119147	117649	122451	123187	120310		114543	118459	118974	121176	119473	118525		111699	113421	108560	110927	106136	110149		97350	100661	91496	94591	98668	96553.2		87664	86455	88074	86796	86396	87077		73120	76528	74127	76254	76775	75360.8
1380	124293	128537	122651	125191	122172	124569		119531	119602	118047	122906	123692	120756		114930	118868	119400	121634	119924	118951		112118	113811	108961	111326	106526	110548		97700	101012	91792	94895	99030	96885.8		87964	86775	88366	87107	86664	87375.2		73386	76784	74360	76479	77070	75615.8
1381	124762	129005	123110	125620	122608	125021		119989	120096	118499	123366	124110	121212		115345	119283	119797	122116	120340	119376		112540	114222	109343	111749	106903	110951		98057	101348	92145	95233	99389	97234.4		88268	87097	88690	87400	86982	87687.4		73656	77048	74598	76748	77360	75882
1382	125212	129531	123537	126101	123081	125492		120390	120505	118954	123859	124568	121655		115774	119672	120243	122525	120803	119803		112926	114627	109740	112162	107305	111352		98396	101707	92487	95564	99756	97582		88555	87447	88990	87703	87317	88002.4		73888	77323	74850	77005	77647	76142.6
1383	125664	130015	124014	126563	123545	125960		120798	120950	119379	124320	125051	122100		116189	120146	120629	123003	121257	120245		113319	115024	110126	112555	107692	111743		98766	102059	92819	95919	100118	97936.2		88879	87749	89316	88010	87614	88313.6		74141	77583	75113	77306	77919	76412.4
1384	126144	130509	124457	127037	124014	126432		121227	121399	119827	124759	125511	122545		116598	120581	121056	123440	121717	120678		113704	115401	110508	112972	108092	112135		99115	102472	93121	96283	100492	98296.6		89186	88050	89621	88346	87915	88623.6		74390	77870	75362	77546	78171	76667.8
1385	126650	130987	124931	127538	124471	126915		121676	121866	120285	125233	125985	123009		117000	121036	121506	123912	122146	121120		114152	115766	110921	113353	108488	112536		99483	102830	93437	96617	100860	98645.4		89471	88376	89945	88673	88208	88934.6		74637	78142	75619	77803	78434	76927
1386	127095	131473	125390	127995	124911	127373		122126	122360	120740	125625	126457	123462		117400	121502	121936	124382	122588	121562		114552	116212	111327	113744	108902	112947		99802	103169	93754	96946	101213	98976.8		89756	88702	90238	88965	88511	89234.4		74903	78410	75890	78077	78722	77200.4
1387	127555	131941	125887	128466	125367	127843		122601	122816	121206	126099	126926	123930		117782	121932	122420	124854	123019	122001		114975	116632	111727	114118	109289	113348		100147	103525	94083	97286	101573	99322.8		90086	89021	90550	89270	88807	89546.8		75167	78659	76166	78295	79005	77458.4
1388	128040	132402	126322	128960	125847	128314		123038	123265	121629	126548	127416	124379		118212	122377	122880	125279	123443	122438		115414	117023	112126	114510	109687	113752		100523	103902	94400	97659	101935	99683.8		90381	89314	90859	89579	89115	89849.6		75405	78916	76450	78579	79265	77723
1389	128506	132837	126794	129436	126333	128781		123449	123692	122046	126995	127899	124816		118646	122809	123341	125744	123874	122883		115829	117451	112535	114896	110090	114160		100893	104277	94737	97992	102270	100034		90674	89628	91160	89885	89425	90154.4		75672	79191	76723	78858	79533	77995.4
1390	129012	133321	127247	129936	126782	129260		123913	124170	122492	127471	128385	125286		119085	123243	123799	126224	124342	123339		116242	117828	112928	115299	110490	114557		101244	104611	95052	98339	102652	100380		90978	89960	91495	90167	89703	90460.6		75914	79461	76963	79123	79786	78249.4
1391	129443	133781	127737	130433	127270	129733		124364	124628	122978	127905	128878	125751		119508	123696	124245	126651	124758	123772		116675	118236	113366	115687	110882	114969		101600	104995	95400	98686	102970	100730		91281	90272	91861	90488	90020	90784.4		76192	79767	77237	79418	80083	78539.4
1392	129914	134287	128233	130930	127733	130219		124800	125064	123422	128358	129350	126199		119919	124120	124737	127134	125187	124219		117105	118658	113789	116098	111285	115387		101968	105355	95739	99037	103320	101084		91614	90601	92173	90798	90332	91103.6		76432	80015	77480	79684	80368	78795.8
1393	130385	134871	128650	131426	128195	130705		125268	125560	123886	128842	129862	126684		120352	124577	125153	127572	125651	124661		117516	119108	114199	116500	111633	115791		102332	105742	96090	99411	103710	101457		91967	90954	92473	91107	90643	91428.8		76690	80304	77737	79957	80621	79061.8
1394	130877	135364	129144	131885	128638	131182		125798	126016	124328	129330	130311	127157		120788	125025	125614	128027	126096	125110		117904	119520	114669	116918	111998	116202		102656	106164	96416	99755	104090	101816		92323	91264	92794	91456	90934	91754.2		76950	80593	77982	80233	80886	79328.8
1395	131375	135865	129648	132357	129161	131681		126239	126460	124786	129832	130793	127622		121168	125476	126086	128493	126529	125550		118333	119961	115080	117350	112416	116628		103001	106514	96752	100115	104465	102169		92624	91566	93097	91748	91245	92056		77253	80854	78251	80536	81180	79614.8
1396	131873	136365	130166	132857	129653	132183		126690	126948	125232	130336	131269	128095		121614	125932	126551	128922	126984	126001		118808	120382	115523	117793	112850	117071		103361	106889	97112	100513	104819	102539		92988	91905	93432	92051	91558	92386.8		77501	81131	78519	80804	81467	79884.4
1397	132353	136880	130664	133358	130100	132671		127174	127360	125680	130832	131741	128557		122044	126400	127013	129363	127440	126452		119214	120815	115938	118208	113258	117487		103717	107273	97451	100897	105186	102905		93300	92209	93775	92343	91875	92700.4		77784	81411	78782	81084	81752	80162.6
1398	132827	137402	131159	133850	130542	133156		127628	127815	126146	131302	132220	129022		122525	126862	127448	129810	127906	126910		119687	121242	116351	118635	113630	117909		104082	107620	97797	101237	105563	103260		93665	92558	94081	92676	92194	93034.8		78030	81697	79075	81362	82013	80435.4
1399	133322	137905	131627	134349	131045	133650		128083	128268	126642	131796	132700	129498		122973	127312	127952	130252	128391	127376		120098	121716	116740	119056	114059	118334		104409	108003	98146	101582	105931	103614		93994	92891	94426	92967	92514	93358.4		78309	82004	79357	81588	82275	80706.6
1400	133858	138425	132118	134846	131534	134156		128540	128740	127158	132344	133180	129992		123431	127762	128387	130715	128824	127824		120559	122175	117147	119479	114485	118769		104793	108391	98519	101918	106327	103990		94305	93213	94783	93296	92808	93681		78564	82261	79633	81892	82554	80980.8
1401	134341	138901	132646	135338	131976	134640		129049	129227	127589	132818	133639	130464		123866	128222	128889	131218	129307	128300		120982	122618	117575	119938	114894	119201		105194	108824	98846	102282	106695	104368		94630	93529	95128	93618	93129	94006.8		78829	82558	79881	82159	82852	81255.8
1402	134875	139419	133073	135839	132458	135133		129481	129712	128059	133298	134147	130939		124299	128656	129374	131700	129819	128770		121404	123127	118003	120376	115293	119641		105587	109204	99173	102616	107072	104730		94964	93817	95439	93960	93446	94325.2		79101	82850	80150	82411	83105	81523.4
1403	135375	139922	133593	136326	132970	135637		130004	130189	128556	133786	134658	131439		124773	129091	129846	132179	130285	129235		121873	123559	118409	120836	115700	120075		105976	109587	99517	102985	107453	105104		95311	94151	95757	94294	93792	94661		79395	83132	80439	82664	83367	81799.4
1404	135865	140446	134080	136863	133429	136137		130516	130656	129038	134243	135116	131914		125250	129553	130335	132669	130747	129711		122325	124037	118835	121262	116103	120512		106345	109983	99851	103364	107825	105474		95658	94475	96090	94649	94092	94992.8		79658	83431	80719	82944	83664	82083.2
1405	136353	140997	134585	137379	133953	136653		130971	131148	129470	134736	135613	132388		125706	130014	130798	133133	131254	130181		122769	124482	119289	121711	116553	120961		106713	110367	100225	103744	108209	105852		95975	94779	96457	94977	94410	95319.6		79922	83697	81024	83210	83978	82366.2
1406	136873	141502	135070	137862	134450	137151		131481	131626	129905	135212	136144	132874		126140	130471	131252	133662	131742	130653		123202	124963	119706	122138	117010	121404		107102	110747	100588	104169	108583	106238		96324	95117	96802	95321	94691	95651		80192	84008	81290	83490	84248	82645.6
1407	137430	142059	135541	138362	135009	137680		132001	132103	130426	135706	136660	133379		126567	130955	131738	134156	132198	131123		123648	125446	120125	122613	117408	121848		107449	111144	100948	104579	108968	106618		96679	95455	97113	95663	95011	95984.2		80477	84318	81561	83792	84561	82941.8
1408	137912	142598	136023	138859	135518	138182		132491	132581	130917	136200	137157	133869		127030	131409	132206	134671	132675	131598		124125	125923	120537	123037	117843	122293		107792	111552	101312	104951	109360	106993		96991	95823	97461	96019	95369	96332.6		80752	84607	81844	84065	84838	83221.2
1409	138400	143128	136515	139364	135990	138679		132960	133070	131382	136707	137620	134348		127453	131881	132702	135173	133161	132074		124566	126347	120944	123478	118298	122727		108192	111950	101683	105304	109743	107374		97309	96136	97802	96347	95702	96659.2		80997	84919	82098	84326	85145	83497
1410	138905	143700	136997	139890	136472	139193		133420	133583	131874	137174	138127	134836		127871	132354	133172	135624	133663	132537		125025	126832	121398	123922	118708	123177		108566	112377	102052	105669	110105	107754		97609	96488	98144	96713	96036	96998		81270	85222	82361	84602	85415	83774
1411	139427	144244	137501	140408	136994	139715		133913	134046	132344	137679	138620	135320		128335	132811	133624	136111	134147	133006		125522	127271	121811	124338	119147	123618		108950	112787	102434	106073	110491	108147		98019	96822	98518	97049	96381	97357.8		81547	85489	82624	84901	85715	84055.2
1412	139995	144781	137983	140932	137476	140233		134389	134522	132811	138221	139156	135820		128782	133311	134099	136612	134626	133486		125962	127777	122265	124764	119557	124065		109287	113198	102774	106446	110870	108515		98359	97138	98853	97371	96734	97691		81861	85770	82893	85164	85997	84337
1413	140500	145305	138485	141481	137990	140752		134875	134997	133340	138707	139649	136314		129217	133789	134602	137070	135117	133959		126399	128242	122761	125172	119973	124509		109686	113605	103168	106833	111252	108909		98707	97476	99195	97716	97088	98036.4		82138	86041	83186	85496	86280	84628.2
1414	141029	145829	139036	141970	138499	141273		135317	135519	133845	139186	140192	136812		129701	134252	135083	137558	135632	134445		126878	128716	123215	125614	120406	124966		110086	114033	103516	107243	111645	109305		99043	97827	99539	98056	97407	98374.4		82435	86346	83492	85756	86601	84926
1415	141541	146349	139589	142488	139030	141799		135807	136034	134362	139721	140692	137323		130121	134724	135535	138060	136104	134909		127320	129142	123607	126072	120824	125393		110466	114423	103885	107629	112012	109683		99355	98172	99902	98392	97759	98716		82729	86636	83750	86020	86896	85206.2
1416	142046	146885	140091	143032	139542	142319		136272	136549	134899	140230	141221	137834		130588	135237	136033	138551	136645	135411		127748	129616	124065	126500	121293	125844		110891	114799	104248	108064	112429	110086		99710	98479	100264	98750	98128	99066.2		83023	86947	84058	86319	87186	85506.6
1417	142552	147432	140643	143600	140062	142858		136781	137056	135412	140786	141747	138356		131040	135734	136534	139076	137159	135909		128217	130064	124501	126979	121694	126291		111287	115220	104597	108459	112819	110476		100092	98809	100651	99070	98477	99419.8		83296	87237	84322	86597	87514	85793.2
1418	143041	148042	141175	144119	140580	143391		137277	137542	135898	141328	142267	138862		131520	136177	137037	139582	137660	136395		128659	130544	124931	127471	122099	126741		111692	115605	104953	108865	113227	110868		100456	99152	100991	99409	98819	99765.4		83569	87550	84599	86903	87794	86083
1419	143571	148597	141704	144611	141074	143911		137784	138050	136339	141825	142759	139351		131998	136679	137557	140059	138128	136884		129142	131040	125367	127957	122520	127205		112080	116057	105332	109254	113581	111261		100828	99500	101358	99733	99181	100120		83870	87866	84851	87198	88106	86378.2
1420	144083	149147	142255	145151	141611	144449		138269	138568	136816	142334	143308	139859		132478	137121	138073	140563	138645	137376		129622	131533	125833	128467	122972	127685		112465	116439	105714	109630	113985	111647		101141	99846	101717	100078	99495	100455		84149	88175	85139	87514	88400	86675.4
1421	144609	149669	142827	145688	142129	144984		138765	139044	137338	142881	143842	140374		132926	137606	138601	141063	139158	137871		130076	132019	126334	128950	123461	128168		112870	116865	106085	110003	114376	112040		101526	100231	102066	100428	99826	100815		84407	88451	85430	87825	88714	86965.4
1422	145133	150245	143364	146207	142667	145523		139301	139591	137883	143412	144428	140923		133364	138080	139116	141590	139685	138367		130577	132474	126789	129414	123905	128632		113270	117273	106471	110389	114774	112435		101912	100611	102407	100780	100194	101181		84712	88761	85688	88118	88976	87251
1423	145700	150822	143917	146745	143206	146078		139790	140092	138424	143989	144960	141451		133816	138536	139644	142080	140171	138849		131029	132978	127225	129868	124349	129090		113715	117714	106851	110786	115137	112841		102247	100963	102740	101144	100550	101529		85025	89068	85959	88429	89285	87553.2
1424	146240	151374	144454	147301	143763	146626		140326	140614	138900	144495	145481	141963		134275	139031	140173	142617	140682	139356		131533	133484	127673	130333	124813	129567		114139	118161	107241	111154	115557	113250		102591	101296	103126	101509	100947	101894		85308	89387	86261	88758	89568	87856.4
1425	146800	151935	145039	147796	144286	147171		140816	141124	139376	145041	145997	142471		134708	139484	140685	143139	141159	139835		131975	133956	128152	130792	125260	130027		114517	118592	107630	111563	116001	113661		102957	101653	103482	101875	101276	102249		85558	89682	86549	89074	89899	88152.4
1426	147309	152532	145591	148331	144786	147710		141360	141675	139932	145578	146544	143018		135195	140030	141169	143663	141665	140344		132421	134388	128608	131243	125690	130470		114916	119006	107985	111959	116379	114049		103306	101990	103843	102233	101631	102601		85841	89984	86838	89376	90192	88446.2
1427	147889	153128	146113	148895	145326	148270		141851	142235	140471	146126	147072	143551		135668	140599	141713	144176	142201	140871		132892	134852	129074	131727	126177	130944		115304	119445	108378	112356	116780	114453		103663	102344	104188	102602	101965	102952		86125	90291	87140	89690	90508	88750.8
1428	148438	153680	146677	149434	145837	148813		142355	142767	140964	146635	147636	144071		136186	141107	142239	144693	142730	141391		133364	135339	129497	132220	126628	131410		115728	119867	108758	112764	117192	114862		103981	102711	104552	102945	102345	103307		86443	90624	87425	90002	90795	89057.8
1429	148993	154278	147231	150004	146371	149375		142856	143325	141478	147188	148199	144609		136670	141595	142775	145201	143265	141901		133859	135858	129982	132691	127057	131889		116103	120308	109180	113155	117620	115273		104395	103074	104926	103322	102716	103687		86732	90924	87721	90340	91126	89368.6
1430	149543	154811	147745	150541	146936	149915		143396	143826	141999	147749	148768	145148		137186	142096	143263	145684	143780	142402		134275	136330	130430	133152	127537	132345		116510	120739	109560	113553	118039	115680		104749	103450	105291	103699	103097	104057		87043	91201	88030	90685	91441	89680
1431	150048	155398	148288	151091	147515	150468		143924	144375	142513	148311	149293	145683		137619	142564	143779	146180	144329	142894		134782	136810	130911	133624	127991	132824		116907	121188	109930	113933	118447	116081		105126	103766	105704	104071	103459	104425		87347	91522	88309	91001	91773	89990.4
1432	150577	156020	148822	151640	148014	151015		144444	144915	143036	148864	149799	146212		138148	143120	144302	146715	144794	143416		135273	137310	131373	134106	128466	133306		117288	121648	110289	114356	118894	116495		105476	104131	106071	104459	103828	104793		87623	91841	88590	91277	92081	90282.4
1433	151113	156604	149366	152217	148576	151575		144950	145423	143551	149443	150372	146748		138657	143614	144835	147231	145333	143934		135754	137816	131847	134567	128939	133785		117706	122076	110711	114794	119308	116919		105906	104482	106390	104817	104187	105156		87933	92176	88866	91579	92383	90587.4
1434	151672	157217	149916	152817	149127	152150		145484	145976	144066	150032	150921	147296		139175	144135	145346	147758	145852	144453		136244	138303	132311	135060	129427	134269		118129	122519	111094	115209	119737	117338		106266	104846	106776	105186	104555	105526		88219	92487	89165	91879	92701	90890.2
1435	152237	157808	150506	153397	149702	152730		146011	146519	144601	150563	151424	147824		139641	144662	145891	148290	146372	144971		136711	138773	132761	135530	129947	134744		118511	122943	111496	115594	120123	117733		106621	105213	107192	105566	104923	105903		88533	92856	89487	92192	93038	91221.2
1436	152828	158416	151120	153919	150242	153305		146532	147067	145139	151080	151926	148349		140112	145196	146408	148777	146912	145481		137161	139293	133242	136027	130417	135228		118952	123354	111847	116023	120532	118142		107017	105562	107552	105906	105279	106263		88860	93189	89798	92494	93367	91541.6
1437	153387	159002	151692	154487	150815	153877		147026	147572	145623	151632	152500	148871		140610	145699	146946	149348	147451	146011		137609	139795	133716	136527	130894	135708		119380	123814	112283	116447	120955	118576		107402	105969	107899	106289	105661	106644		89151	93475	90114	92791	93667	91839.6
1438	153943	159616	152209	155062	151386	154443		147556	148152	146159	152214	153074	149431		141118	146238	147464	149905	147990	146543		138087	140246	134215	137005	131374	136185		119789	124258	112669	116876	121400	118998		107772	106343	108316	106665	106030	107025		89460	93766	90414	93096	93974	92142
1439	154525	160238	152781	155655	151929	155026		148067	148699	146704	152839	153615	149985		141609	146768	148024	150412	148542	147071		138609	140737	134705	137480	131836	136673		120214	124665	113096	117329	121822	119425		108134	106702	108718	107053	106405	107402		89796	94079	90687	93441	94306	92461.8
1440	155097	160873	153387	156227	152514	155620		148612	149254	147255	153443	154139	150541		142122	147311	148591	150920	149041	147597		139069	141228	135164	137970	132309	137148		120668	125125	113495	117726	122261	119855		108507	107068	109083	107411	106799	107774		90104	94440	90964	93755	94643	92781.2
1441	155681	161442	153949	156840	153116	156206		149113	149808	147787	153981	154731	151084		142641	147853	149147	151452	149586	148136		139571	141777	135672	138472	132748	137648		121096	125539	113918	118155	122710	120284		108913	107431	109482	107768	107161	108151		90411	94737	91258	94059	94957	93084.4
1442	156304	162099	154560	157457	153709	156826		149643	150324	148337	154569	155266	151628		143150	148416	149669	152013	150166	148683		140089	142236	136157	138965	133273	138144		121539	125989	114322	118567	123149	120713		109285	107817	109868	108156	107524	108530		90731	95047	91532	94375	95272	93391.4
1443	156881	162734	155156	158053	154276	157420		150183	150853	148869	155106	155824	152167		143672	148907	150237	152570	150637	149205		140561	142735	136664	139483	133761	138641		121947	126439	114693	118974	123615	121134		109664	108156	110271	108517	107856	108893		91074	95364	91843	94672	95593	93709.2
1444	157486	163383	155704	158643	154873	158018		150731	151416	149420	155690	156424	152736		144217	149410	150736	153113	151170	149729		141029	143266	137152	139977	134236	139132		122340	126877	115061	119403	124060	121548		110031	108520	110665	108904	108227	109269		91368	95676	92151	95008	95890	94018.6
1445	158062	164026	156255	159219	155429	158598		151295	152009	149948	156238	156969	153292		144737	149996	151305	153626	151744	150282		141559	143780	137650	140497	134745	139646		122772	127333	115465	119854	124526	121990		110436	108888	111064	109277	108606	109654		91681	96014	92452	95328	96203	94335.6
1446	158655	164678	156871	159810	156002	159203		151816	152602	150504	156822	157552	153859		145227	150544	151862	154183	152274	150818		142093	144237	138199	140997	135232	140152		123223	127761	115840	120297	124978	122420		110831	109281	111454	109672	109011	110050		91994	96337	92759	95627	96519	94647.2
1447	159230	165337	157451	160401	156590	159802		152344	153203	150987	157406	158112	154410		145759	151146	152393	154752	152815	151373		142609	144722	138727	141526	135738	140664		123648	128217	116235	120726	125419	122849		111203	109674	111834	110053	109428	110438		92335	96684	93078	95939	96830	94973.2
1448	159793	165959	158085	160937	157160	160387		152904	153783	151551	157943	158668	154970		146263	151675	152946	155304	153395	151917		143066	145267	139219	142041	136242	141167		124065	128676	116630	121132	125859	123272		111569	110043	112248	110418	109807	110817		92648	97020	93429	96267	97125	95297.8
1449	160374	166549	158683	161533	157753	160978		153507	154372	152094	158482	159250	155541		146801	152227	153522	155888	153931	152474		143602	145759	139745	142582	136744	141686		124511	129058	117025	121571	126304	123694		111943	110406	112664	110800	110207	111204		92947	97372	93768	96567	97460	95622.8
1450	160955	167174	159270	162173	158344	161583		154077	154955	152643	159090	159808	156115		147318	152743	154074	156443	154524	153020		144122	146275	140225	143126	137215	142193		124955	129509	117437	121984	126766	124130		112307	110795	113090	111196	110595	111597		93272	97696	94098	96891	97802	95951.8
1451	161579	167727	159847	162788	158919	162172		154676	155502	153217	159700	160397	156698		147865	153257	154655	157006	155110	153579		144605	146785	140707	143638	137709	142689		125414	129954	117821	122407	127225	124564		112701	111200	113514	111605	110998	112004		93654	98020	94441	97239	98137	96298.2
1452	162180	168399	160453	163412	159526	162794		155231	156054	153797	160297	160978	157271		148411	153807	155213	157576	155658	154133		145103	147326	141197	144120	138210	143191		125892	130405	118241	122846	127691	125015		113058	111591	113913	111977	111379	112384		94010	98332	94737	97558	98463	96620
1453	162767	169005	161036	164006	160157	163394		155824	156654	154327	160886	161587	157856		148922	154341	155746	158162	156210	154676		145630	147799	141693	144647	138728	143699		126344	130882	118679	123316	128160	125476		113471	111968	114297	112340	111753	112766		94342	98639	95051	97892	98772	96939.2
1454	163382	169642	161661	164653	160770	164022		156394	157193	154861	161472	162169	158418		149422	154926	156305	158747	156744	155229		146108	148290	142233	145135	139203	144194		126804	131370	119118	123762	128662	125943		113872	112352	114667	112713	112142	113149		94644	99010	95361	98250	99082	97269.4
1455	164027	170254	162289	165260	161359	164638		156953	157721	155473	162119	162782	159010		149936	155484	156877	159293	157337	155785		146607	148792	142719	145625	139685	144686		127236	131818	119518	124162	129118	126370		114253	112752	115087	113106	112554	113550		94974	99364	95688	98603	99421	97610
1456	164682	170857	162914	165895	161922	165254		157546	158273	156028	162727	163380	159591		150476	156097	157503	159827	157908	156362		147106	149342	143212	146140	140174	145195		127692	132282	119934	124586	129578	126814		114650	113143	115471	113500	112945	113942		95302	99687	95996	98915	99767	97933.4
1457	165316	171541	163485	166452	162478	165854		158089	158877	156599	163298	163972	160167		151015	156683	158058	160384	158510	156930		147626	149895	143702	146661	140676	145712		128132	132709	120408	125073	130041	127273		115038	113517	115869	113865	113363	114330		95604	100018	96317	99232	100106	98255.4
1458	165946	172160	164104	167092	163075	166475		158722	159440	157177	163900	164584	160765		151574	157197	158614	160938	159090	157483		148175	150426	144235	147145	141185	146233		128583	133196	120861	125498	130521	127732		115438	113934	116258	114262	113744	114727		95926	100336	96666	99564	100442	98586.8
1459	166567	172819	164707	167679	163702	167095		159311	160069	157739	164481	165196	161359		152123	157729	159161	161477	159657	158029		148664	150994	144730	147667	141707	146752		129002	133694	121267	125910	130959	128166		115818	114318	116686	114629	114135	115117		96267	100676	96978	99918	100734	98914.6
1460	167161	173408	165323	168310	164344	167709		159933	160641	158321	165111	165828	161967		152665	158308	159756	162032	160211	158594		149208	151536	145243	148208	142192	147277		129437	134132	121677	126341	131409	128599		116241	114696	117074	115022	114567	115520		96598	100992	97308	100296	101099	99258.6
1461	167780	174061	165967	168947	164952	168341		160488	161210	158926	165709	166396	162546		153209	158866	160313	162645	160831	159173		149746	152079	145811	148763	142743	147828		129908	134618	122105	126783	131883	129059		116686	115095	117515	115426	114971	115939		96929	101323	97625	100657	101437	99594.2
1462	168416	174708	166646	169600	165607	168995		161089	161770	159493	166336	166997	163137		153726	159465	160870	163264	161401	159745		150260	152615	146328	149272	143210	148337		130352	135110	122544	127250	132386	129528		117138	115476	117953	115823	115375	116353		97254	101659	97962	101030	101756	99932.2
1463	169029	175385	167318	170271	166289	169658		161667	162391	160091	166961	167601	163742		154251	160045	161431	163833	161971	160306		150776	153176	146837	149826	143708	148865		130804	135606	122933	127714	132877	129987		117544	115876	118364	116210	115764	116752		97581	102023	98299	101373	102079	100271
1464	169684	176053	167906	170861	166896	170280		162254	163005	160688	167545	168214	164341		154844	160597	161985	164353	162522	160860		151338	153715	147364	150350	144186	149391		131243	136067	123374	128149	133341	130435		117966	116303	118751	116602	116157	117156		97929	102382	98644	101739	102430	100625
1465	170313	176683	168543	171476	167523	170908		162823	163568	161261	168165	168820	164927		155440	161194	162585	164926	163086	161446		151873	154247	147867	150890	144656	149907		131706	136525	123833	128605	133787	130891		118361	116685	119115	117013	116533	117541		98255	102721	99015	102096	102785	100974
1466	170899	177392	169166	172142	168139	171548		163457	164133	161840	168801	169407	165528		156006	161778	163185	165591	163684	162049		152442	154821	148368	151459	145190	150456		132177	137035	124263	129074	134274	131365		118795	117059	119560	117420	116952	117957		98596	103070	99339	102451	103154	101322
1467	171561	178107	169722	172779	168753	172184		164068	164729	162417	169425	169982	166124		156580	162365	163706	166164	164262	162615		152981	155363	148897	151985	145704	150986		132661	137566	124730	129572	134772	131860		119193	117496	119993	117820	117366	118374		98946	103401	99683	102804	103482	101663
1468	172200	178770	170321	173450	169399	172828		164582	165301	163010	170057	170582	166706		157143	162920	164301	166737	164841	163188		153483	155892	149438	152547	146199	151512		133116	138056	125197	129998	135252	132324		119601	117891	120448	118213	117792	118789		99283	103734	100018	103133	103845	102003
1469	172810	179505	170965	174103	170016	173480		165176	165920	163609	170696	171193	167319		157737	163485	164882	167322	165405	163766		154024	156467	149998	153054	146723	152053		133570	138553	125620	130465	135718	132785		120035	118299	120871	118636	118199	119208		99604	104073	100378	103490	104205	102350
1470	173424	180218	171646	174739	170638	174133		165816	166514	164156	171309	171828	167925		158293	164079	165442	167887	166025	164345		154564	157002	150538	153587	147239	152586		134069	139050	126034	130928	136183	133253		120469	118672	121263	119122	118609	119627		99928	104423	100708	103849	104576	102697
1471	174101	180895	172259	175352	171261	174774		166404	167092	164716	171914	172451	168515		158882	164638	166021	168510	166684	164947		155114	157560	151100	154112	147748	153127		134524	139547	126466	131418	136642	133719		120871	119071	121689	119504	119028	120033		100218	104781	101067	104179	104895	103028
1472	174782	181578	172911	176047	171835	175431		166994	167729	165343	172553	173063	169136		159471	165256	166559	169145	167267	165540		155676	158080	151626	154666	148290	153668		134995	140006	126901	131893	137126	134184		121289	119482	122170	119955	119455	120470		100577	105105	101429	104515	105283	103382
1473	175439	182217	173515	176729	172515	176083		167570	168381	165967	173187	173711	169763		160018	165844	167152	169722	167848	166117		156253	158669	152165	155183	148813	154217		135471	140490	127321	132350	137619	134650		121672	119876	122631	120354	119871	120881		100866	105431	101749	104859	105597	103700
1474	176115	182858	174193	177391	173156	176743		168204	169002	166550	173833	174392	170396		160594	166469	167764	170304	168441	166714		156839	159208	152697	155713	149351	154762		135920	140958	127790	132845	138069	135116		122121	120294	123048	120796	120304	121313		101208	105810	102055	105216	105973	104052
1475	176806	183538	174830	178068	173802	177409		168801	169552	167168	174416	175082	171004		161171	167088	168379	170933	169006	167315		157395	159771	153199	156212	149929	155301		136429	141465	128210	133288	138520	135582		122572	120758	123483	121175	120729	121743		101533	106166	102429	105556	106319	104401
1476	177471	184172	175468	178760	174415	178057		169383	170174	167822	175048	175721	171630		161773	167683	168953	171511	169597	167903		157947	160377	153786	156777	150437	155865		136918	141949	128681	133779	139011	136068		123015	121180	123904	121569	121143	122162		101833	106542	102751	105883	106687	104739
1477	178152	184869	176165	179439	175039	178733		169996	170780	168437	175704	176353	172254		162368	168314	169603	172116	170227	168526		158534	160959	154295	157364	150984	156427		137390	142449	129127	134239	139489	136539		123446	121612	124327	122001	121558	122589		102191	106873	103073	106217	107050	105081
1478	178775	185542	176838	180057	175695	179381		170584	171436	169020	176386	177036	172892		162981	168956	170213	172740	170820	169142		159113	161540	154838	157916	151539	156989		137835	142953	129588	134731	139956	137013		123894	122020	124747	122389	121992	123008		102548	107206	103416	106586	107398	105431
1479	179454	186236	177488	180720	176338	180047		171206	172048	169607	176992	177649	173500		163631	169577	170805	173420	171437	169774		159667	162127	155401	158489	152110	157559		138324	143466	130052	135242	140443	137505		124348	122439	125193	122841	122401	123444		102904	107580	103760	106938	107760	105788
1480	180126	186921	178134	181411	176964	180711		171839	172674	170235	177647	178291	174137		164215	170175	171412	174032	172070	170381		160233	162708	155941	159041	152621	158109		138817	143976	130552	135721	140917	137997		124770	122901	125636	123277	122847	123886		103260	107939	104090	107302	108123	106143
1481	180775	187587	178796	182079	177600	181367		172505	173309	170830	178279	178918	174768		164817	170785	172041	174614	172657	170983		160782	163265	156504	159589	153173	158663		139330	144464	131015	136207	141384	138480		125167	123331	126058	123699	123276	124306		103632	108299	104475	107654	108489	106510
1482	181456	188273	179479	182756	178188	182030		173123	173953	171491	178925	179588	175416		165381	171354	172605	175212	173278	171566		161372	163826	157024	160100	153737	159212		139835	144957	131464	136692	141856	138961		125625	123761	126505	124142	123760	124759		103953	108699	104835	108048	108834	106874
1483	182120	188959	180149	183445	178916	182718		173730	174601	172101	179589	180250	176054		165932	171999	173226	175832	173930	172184		161938	164414	157572	160641	154297	159772		140303	145477	131912	137169	142347	139442		126078	124175	126964	124586	124185	125198		104254	109058	105150	108438	109197	107219
1484	182748	189702	180764	184168	179544	183385		174373	175220	172719	180278	180952	176708		166556	172655	173834	176442	174573	172812		162533	164993	158137	161220	154806	160338		140821	145950	132382	137609	142888	139930		126504	124606	127411	124991	124604	125623		104649	109409	105487	108788	109593	107585
1485	183410	190426	181420	184838	180244	184068		174992	175886	173338	180920	181567	177341		167136	173278	174462	177066	175201	173429		163116	165561	158697	161767	155360	160900		141285	146504	132847	138043	143382	140412		126923	125045	127842	125414	125055	126056		105008	109769	105839	109162	109954	107946
1486	184087	191160	182066	185544	180893	184750		175619	176455	173957	181535	182253	177964		167808	173897	175095	177734	175796	174066		163689	166143	159228	162343	155911	161463		141801	146998	133324	138520	143947	140918		127323	125471	128254	125833	125538	126484		105349	110126	106214	109524	110313	108305
1487	184759	191842	182794	186255	181540	185438		176235	177139	174550	182221	182891	178607		168438	174491	175704	178388	176401	174684		164318	166786	159773	162922	156444	162049		142303	147560	133788	139002	144429	141416		127765	125941	128736	126273	125972	126937		105675	110502	106570	109906	110671	108665
1488	185455	192537	183460	186921	182228	186120		176922	177739	175173	182895	183485	179243		169081	175116	176381	179020	177083	175336		164931	167351	160391	163503	157028	162641		142770	148093	134260	139534	144980	141927		128212	126392	129176	126698	126431	127382		106014	110895	106924	110311	111040	109037
1489	186164	193250	184102	187592	182894	186800		177565	178361	175827	183595	184182	179906		169663	175749	176997	179686	177742	175967		165518	167968	161005	164079	157584	163231		143271	148605	134733	139975	145460	142409		128696	126824	129639	127161	126889	127842		106355	111281	107274	110676	111429	109403
1490	186863	193984	184754	188278	183567	187489		178207	178982	176447	184301	184820	180551		170273	176419	177657	180368	178397	176623		166108	168582	161572	164654	158154	163814		143789	149108	135205	140445	145993	142908		129128	127284	130109	127574	127330	128285		106715	111671	107624	111022	111789	109764
1491	187554	194679	185425	188972	184286	188183		178861	179602	177085	184974	185463	181197		170909	177073	178324	180974	179023	177261		166692	169185	162151	165232	158691	164390		144285	149604	135666	140921	146518	143399		129562	127712	130546	128030	127762	128722		107063	112044	108022	111402	112151	110136
1492	188236	195435	186127	189674	185033	188901		179499	180274	177691	185709	186151	181865		171523	177722	178919	181594	179672	177886		167270	169829	162714	165785	159217	164963		144803	150106	136190	141392	147043	143907		130036	128188	131030	128480	128244	129196		107406	112451	108367	111761	112561	110509
1493	188972	196223	186850	190390	185720	189631		180162	180908	178344	186415	186857	182537		172138	178409	179578	182250	180301	178535		167884	170438	163251	166376	159788	165547		145272	150642	136689	141909	147584	144419		130525	128643	131480	128949	128685	129656		107767	112819	108734	112122	112950	110878
1494	189698	196939	187522	191053	186419	190326		180809	181573	178985	187056	187527	183190		172734	179025	180206	182944	180897	179161		168521	171028	163839	166969	160347	166141		145771	151138	137181	142425	148062	144915		131000	129051	131951	129424	129114	130108		108130	113202	109113	112528	113352	111265
1495	190420	197678	188212	191820	187147	191055		181431	182277	179684	187729	188212	183867		173361	179670	180903	183611	181554	179820		169132	171591	164428	167594	160923	166734		146244	151667	137636	142913	148569	145406		131470	129491	132441	129860	129590	130570		108526	113565	109493	112889	113715	111638
1496	191084	198403	188875	192568	187866	191759		182107	182937	180293	188421	188880	184528		173956	180294	181517	184312	182180	180452		169698	172212	164988	168199	161492	167318		146753	152211	138103	143393	149111	145914		131949	129949	132862	130316	130024	131020		108859	113939	109861	113292	114083	112007
1497	191787	199149	189578	193271	188527	192462		182732	183594	180987	189151	189535	185200		174611	180981	182096	184930	182827	181089		170333	172789	165557	168774	162078	167906		147265	152731	138608	143900	149608	146422		132399	130383	133332	130752	130507	131475		109229	114353	110219	113684	114470	112391
1498	192458	199936	190318	194026	189262	193200		183420	184231	181646	189888	190230	185883		175241	181621	182697	185660	183507	181745		170964	173421	166119	169357	162628	168498		147771	153219	139152	144433	150155	146946		132843	130837	133772	131218	130991	131932		109602	114769	110597	114129	114833	112786
1499	193185	200671	191035	194745	190009	193929		184084	184882	182272	190581	190946	186553		175866	182324	183342	186295	184157	182397		171579	174034	166761	169942	163221	169107		148298	153754	139665	144926	150679	147464		133318	131277	134204	131691	131475	132393		110021	115139	110980	114512	115253	113181
[truncated: 48 more columns]

## Sheet: p53 RNAi-MNNG (b)
	No of cells							No of cells							No of cells							No of cells							No of cells							No of cells							No of cells
Time	p53Si-sim	p53Si-sim	p53Si-sim	p53Si-sim	p53Si-sim	Average		p53Si-MNNG0.5-sim	p53Si-MNNG0.5-sim	p53Si-MNNG0.5-sim	p53Si-MNNG0.5-sim	p53Si-MNNG0.5-sim	Average		p53Si-MNNG1-sim	p53Si-MNNG1-sim	p53Si-MNNG1-sim	p53Si-MNNG1-sim	p53Si-MNNG1-sim	Average		p53Si-MNNG1.5-sim	p53Si-MNNG1.5-sim	p53Si-MNNG1.5-sim	p53Si-MNNG1.5-sim	p53Si-MNNG1.5-sim	Average		p53Si-MNNG2-sim	p53Si-MNNG2-sim	p53Si-MNNG2-sim	p53Si-MNNG2-sim	p53Si-MNNG2-sim	Average		p53Si-MNNG2.5-sim	p53Si-MNNG2.5-sim	p53Si-MNNG2.5-sim	p53Si-MNNG2.5-sim	p53Si-MNNG2.5-sim	Average		p53Si-MNNG3-sim	p53Si-MNNG3-sim	p53Si-MNNG3-sim	p53Si-MNNG3-sim	p53Si-MNNG3-sim	Average
0	1000	1000	1000	1000	1000	1000		1000	1000	1000	1000	1000	1000		1000	1000	1000	1000	1000	1000		1000	1000	1000	1000	1000	1000		1000	1000	1000	1000	1000	1000		1000	1000	1000	1000	1000	1000		1000	1000	1000	1000	1000	1000
1	1000	1000	1000	1000	1000	1000		1000	1000	1000	1000	1000	1000		1000	1000	1000	1000	1000	1000		1000	1000	1000	1000	1000	1000		1000	1000	1000	1000	1000	1000		1000	1000	1000	1000	1000	1000		1000	1000	1000	1000	1000	1000
2	1000	1000	1000	1000	1000	1000		1000	1000	1000	1000	1000	1000		1000	1000	1000	1000	1000	1000		1000	1000	1000	1000	1000	1000		1000	1000	1000	1000	1000	1000		1000	1000	1000	1000	1000	1000		1000	1000	1000	1000	1000	1000
3	1000	1000	1000	1000	1000	1000		1000	1000	1000	1000	1000	1000		1000	1000	1000	1000	1000	1000		1000	1000	1000	1000	1000	1000		1000	1000	1000	1000	1000	1000		1000	1000	1000	1000	1000	1000		1000	1000	1000	1000	1000	1000
4	1000	1000	1000	999	1000	999.8		1000	1000	999	1000	1000	999.8		1000	1000	1000	999	1000	999.8		1000	1000	998	999	1000	999.4		999	1000	1000	1000	1000	999.8		1000	1000	1000	999	1000	999.8		1000	1000	1000	1000	999	999.8
5	1001	1000	1004	1002	1001	1001.6		1010	1003	1003	1006	1011	1006.6		1009	1011	1008	1004	1010	1008.4		1005	1004	1007	1011	1007	1006.8		1003	1009	1009	1011	1004	1007.2		1008	1014	1012	1008	1006	1009.6		1010	1009	1007	1009	1013	1009.6
6	1004	1003	1007	1003	1005	1004.4		1012	1008	1004	1009	1011	1008.8		1012	1014	1011	1007	1013	1011.4		1006	1007	1009	1017	1008	1009.4		1003	1009	1009	1011	1004	1007.2		1008	1014	1012	1007	1006	1009.4		1010	1009	1007	1009	1013	1009.6
7	1007	1004	1010	1007	1007	1007		1012	1008	1004	1009	1011	1008.8		1012	1014	1011	1007	1013	1011.4		1010	1008	1009	1018	1011	1011.2		1009	1015	1013	1015	1012	1012.8		1013	1018	1016	1013	1018	1015.6		1021	1015	1013	1015	1020	1016.8
8	1015	1009	1022	1013	1011	1014		1017	1014	1010	1016	1019	1015.2		1019	1021	1018	1020	1016	1018.8		1011	1012	1014	1022	1019	1015.6		1009	1017	1014	1022	1014	1015.2		1016	1021	1017	1019	1019	1018.4		1021	1015	1013	1015	1020	1016.8
9	1022	1016	1035	1026	1022	1024.2		1019	1019	1011	1018	1020	1017.4		1019	1021	1018	1020	1016	1018.8		1011	1012	1014	1022	1019	1015.6		1013	1019	1018	1024	1017	1018.2		1016	1025	1019	1021	1020	1020.2		1023	1018	1015	1015	1021	1018.4
10	1022	1016	1035	1026	1022	1024.2		1020	1020	1014	1020	1022	1019.2		1022	1024	1021	1023	1019	1021.8		1013	1014	1016	1024	1019	1017.2		1013	1019	1017	1024	1017	1018		1016	1025	1019	1021	1020	1020.2		1023	1018	1015	1015	1021	1018.4
11	1022	1016	1035	1026	1022	1024.2		1020	1020	1014	1020	1022	1019.2		1022	1024	1021	1023	1019	1021.8		1013	1014	1016	1024	1019	1017.2		1017	1019	1021	1026	1020	1020.6		1018	1025	1020	1022	1023	1021.6		1024	1021	1019	1019	1025	1021.6
12	1023	1018	1039	1030	1023	1026.6		1022	1020	1015	1021	1023	1020.2		1023	1025	1023	1026	1021	1023.6		1014	1014	1020	1026	1020	1018.8		1019	1026	1023	1029	1021	1023.6		1021	1026	1023	1024	1024	1023.6		1026	1022	1022	1023	1030	1024.6
13	1025	1021	1041	1033	1028	1029.6		1022	1020	1015	1021	1023	1020.2		1022	1025	1023	1026	1021	1023.4		1014	1014	1020	1026	1020	1018.8		1019	1026	1023	1029	1021	1023.6		1021	1026	1023	1024	1024	1023.6		1026	1022	1022	1023	1030	1024.6
14	1028	1022	1045	1035	1030	1032		1023	1020	1016	1024	1024	1021.4		1028	1025	1025	1028	1022	1025.6		1017	1014	1026	1030	1024	1022.2		1020	1028	1024	1030	1022	1024.8		1023	1029	1023	1027	1025	1025.4		1027	1027	1024	1026	1031	1027
15	1027	1022	1045	1035	1030	1031.8		1023	1020	1016	1024	1024	1021.4		1028	1025	1025	1028	1022	1025.6		1017	1014	1026	1030	1024	1022.2		1025	1030	1026	1034	1022	1027.4		1024	1030	1023	1028	1029	1026.8		1029	1028	1025	1029	1032	1028.6
16	1032	1024	1048	1038	1032	1034.8		1024	1022	1020	1028	1024	1023.6		1032	1029	1028	1030	1025	1028.8		1019	1018	1028	1031	1027	1024.6		1025	1030	1026	1034	1022	1027.4		1024	1030	1023	1028	1029	1026.8		1029	1028	1025	1028	1032	1028.4
17	1032	1024	1048	1037	1031	1034.4		1024	1022	1020	1028	1024	1023.6		1032	1028	1028	1030	1025	1028.6		1023	1021	1028	1033	1029	1026.8		1027	1030	1027	1038	1023	1029		1033	1033	1027	1032	1034	1031.8		1034	1029	1025	1034	1037	1031.8
18	1041	1036	1056	1042	1038	1042.6		1026	1026	1020	1030	1026	1025.6		1031	1028	1028	1030	1025	1028.4		1025	1024	1029	1033	1031	1028.4		1027	1030	1027	1041	1023	1029.6		1037	1035	1030	1038	1035	1035		1036	1030	1027	1035	1045	1034.6
19	1042	1039	1056	1044	1040	1044.2		1036	1031	1022	1034	1030	1030.6		1033	1032	1033	1037	1032	1033.4		1028	1029	1035	1040	1038	1034		1034	1034	1037	1045	1032	1036.4		1045	1046	1045	1041	1047	1044.8		1049	1037	1034	1041	1052	1042.6
20	1042	1039	1056	1044	1040	1044.2		1036	1033	1024	1036	1033	1032.4		1036	1035	1034	1039	1037	1036.2		1030	1029	1037	1042	1040	1035.6		1041	1036	1038	1048	1036	1039.8		1050	1048	1048	1044	1051	1048.2		1055	1047	1039	1043	1057	1048.2
21	1042	1039	1056	1044	1040	1044.2		1036	1033	1024	1036	1033	1032.4		1036	1035	1034	1039	1037	1036.2		1030	1029	1037	1042	1040	1035.6		1041	1038	1040	1052	1037	1041.6		1053	1051	1048	1046	1056	1050.8		1057	1048	1042	1043	1058	1049.6
22	1049	1046	1061	1045	1045	1049.2		1037	1037	1026	1037	1036	1034.6		1038	1036	1035	1043	1042	1038.8		1031	1029	1039	1043	1041	1036.6		1041	1038	1040	1051	1037	1041.4		1052	1051	1048	1046	1055	1050.4		1057	1048	1042	1043	1058	1049.6
23	1054	1052	1065	1052	1055	1055.6		1038	1040	1027	1038	1037	1036		1038	1036	1035	1043	1042	1038.8		1031	1029	1039	1043	1041	1036.6		1041	1038	1040	1051	1037	1041.4		1052	1051	1047	1046	1055	1050.2		1056	1048	1041	1043	1058	1049.2
24	1055	1054	1070	1054	1056	1057.8		1043	1042	1029	1039	1040	1038.6		1041	1037	1042	1043	1044	1041.4		1036	1033	1041	1044	1044	1039.6		1043	1042	1040	1058	1039	1044.4		1056	1055	1049	1048	1058	1053.2		1059	1049	1046	1045	1059	1051.6
25	1056	1057	1073	1054	1057	1059.4		1043	1042	1029	1039	1040	1038.6		1041	1037	1042	1043	1044	1041.4		1036	1033	1041	1044	1044	1039.6		1043	1042	1040	1058	1039	1044.4		1056	1055	1049	1048	1058	1053.2		1059	1049	1046	1045	1059	1051.6
26	1055	1057	1073	1054	1057	1059.2		1044	1046	1031	1045	1041	1041.4		1044	1038	1043	1043	1044	1042.4		1040	1036	1044	1046	1044	1042		1043	1042	1040	1058	1039	1044.4		1056	1055	1049	1048	1058	1053.2		1059	1049	1045	1045	1058	1051.2
27	1059	1061	1075	1059	1058	1062.4		1047	1047	1034	1050	1044	1044.4		1047	1040	1043	1043	1046	1043.8		1040	1037	1046	1047	1048	1043.6		1043	1042	1040	1057	1039	1044.2		1056	1055	1049	1048	1057	1053		1059	1049	1045	1045	1057	1051
28	1060	1064	1077	1062	1060	1064.6		1047	1047	1034	1050	1044	1044.4		1047	1040	1043	1043	1046	1043.8		1040	1037	1046	1046	1048	1043.4		1043	1042	1040	1057	1039	1044.2		1056	1055	1049	1047	1057	1052.8		1059	1049	1045	1045	1057	1051
29	1060	1064	1077	1062	1060	1064.6		1048	1050	1036	1053	1045	1046.4		1048	1043	1044	1045	1047	1045.4		1043	1038	1049	1050	1049	1045.8		1043	1042	1040	1057	1039	1044.2		1056	1055	1049	1047	1057	1052.8		1059	1049	1045	1045	1057	1051
30	1065	1067	1083	1069	1067	1070.2		1050	1051	1038	1055	1048	1048.4		1049	1043	1044	1048	1050	1046.8		1049	1041	1051	1052	1050	1048.6		1045	1043	1044	1061	1040	1046.6		1060	1058	1051	1050	1058	1055.4		1062	1052	1046	1049	1059	1053.6
31	1065	1067	1083	1069	1067	1070.2		1049	1051	1038	1055	1048	1048.2		1049	1043	1044	1048	1050	1046.8		1049	1041	1051	1052	1050	1048.6		1045	1043	1044	1061	1040	1046.6		1060	1058	1051	1050	1058	1055.4		1062	1052	1046	1049	1059	1053.6
32	1065	1067	1082	1069	1067	1070		1054	1051	1044	1056	1050	1051		1051	1045	1046	1049	1052	1048.6		1054	1042	1056	1055	1053	1052		1050	1047	1048	1066	1045	1051.2		1063	1062	1054	1054	1066	1059.8		1064	1056	1048	1052	1062	1056.4
33	1067	1073	1082	1070	1070	1072.4		1054	1049	1043	1056	1050	1050.4		1051	1045	1046	1049	1052	1048.6		1054	1042	1056	1055	1053	1052		1050	1047	1048	1066	1045	1051.2		1063	1062	1054	1053	1066	1059.6		1064	1056	1048	1052	1062	1056.4
34	1070	1076	1083	1075	1073	1075.4		1057	1052	1044	1057	1055	1053		1054	1050	1046	1051	1056	1051.4		1058	1045	1059	1059	1054	1055		1049	1047	1048	1066	1045	1051		1063	1060	1054	1053	1066	1059.2		1064	1056	1047	1052	1062	1056.2
35	1070	1076	1083	1075	1073	1075.4		1059	1054	1047	1059	1058	1055.4		1055	1057	1047	1056	1057	1054.4		1059	1048	1062	1063	1055	1057.4		1055	1048	1050	1067	1047	1053.4		1064	1060	1056	1055	1068	1060.6		1067	1064	1051	1054	1066	1060.4
36	1070	1076	1083	1075	1073	1075.4		1059	1054	1047	1059	1058	1055.4		1055	1056	1047	1056	1057	1054.2		1059	1048	1062	1063	1055	1057.4		1055	1048	1050	1067	1047	1053.4		1064	1060	1056	1054	1068	1060.4		1066	1064	1051	1054	1066	1060.2
37	1070	1076	1083	1075	1073	1075.4		1059	1054	1047	1059	1057	1055.2		1055	1056	1047	1056	1057	1054.2		1061	1048	1068	1065	1057	1059.8		1058	1051	1051	1070	1048	1055.6		1070	1064	1059	1057	1071	1064.2		1073	1067	1053	1058	1067	1063.6
38	1071	1078	1083	1075	1075	1076.4		1065	1059	1054	1065	1062	1061		1065	1066	1054	1063	1061	1061.8		1066	1052	1072	1066	1063	1063.8		1060	1057	1054	1073	1048	1058.4		1070	1064	1059	1057	1071	1064.2		1073	1067	1053	1058	1067	1063.6
39	1075	1081	1085	1075	1077	1078.6		1064	1059	1054	1065	1062	1060.8		1064	1066	1054	1063	1061	1061.6		1066	1051	1072	1066	1063	1063.6		1059	1056	1053	1073	1048	1057.8		1070	1064	1059	1057	1070	1064		1073	1067	1051	1058	1067	1063.2
40	1080	1083	1087	1080	1080	1082		1072	1063	1056	1072	1066	1065.8		1068	1072	1061	1068	1068	1067.4		1073	1055	1075	1068	1069	1068		1061	1065	1060	1083	1054	1064.6		1073	1070	1061	1058	1075	1067.4		1076	1068	1051	1060	1069	1064.8
41	1084	1087	1088	1082	1085	1085.2		1084	1072	1062	1083	1071	1074.4		1072	1083	1070	1074	1081	1076		1079	1058	1077	1071	1073	1071.6		1065	1070	1063	1087	1058	1068.6		1075	1070	1063	1059	1076	1068.6		1077	1070	1054	1060	1072	1066.6
42	1084	1087	1088	1082	1084	1085		1087	1075	1064	1086	1073	1077		1073	1085	1075	1076	1085	1078.8		1087	1062	1082	1074	1076	1076.2		1068	1075	1067	1090	1062	1072.4		1081	1075	1072	1065	1087	1076		1083	1079	1061	1068	1077	1073.6
43	1090	1086	1091	1082	1086	1087		1090	1075	1065	1090	1075	1079		1075	1087	1079	1081	1087	1081.8		1091	1063	1082	1075	1085	1079.2		1068	1075	1067	1090	1062	1072.4		1081	1075	1072	1065	1087	1076		1083	1079	1061	1068	1077	1073.6
44	1092	1089	1092	1082	1087	1088.4		1093	1082	1075	1098	1081	1085.8		1083	1091	1084	1088	1094	1088		1093	1074	1084	1079	1090	1084		1068	1078	1069	1093	1064	1074.4		1083	1077	1072	1066	1090	1077.6		1084	1079	1063	1072	1082	1076
45	1093	1093	1099	1083	1092	1092		1095	1085	1075	1099	1083	1087.4		1085	1091	1086	1090	1095	1089.4		1095	1078	1087	1082	1092	1086.8		1069	1078	1072	1097	1065	1076.2		1087	1078	1075	1070	1094	1080.8		1086	1080	1063	1073	1083	1077
[truncated: 1,454 more rows]
[truncated: 48 more columns]

## Sheet: Dose curve (c-d)
4000 mim						15000 min
	Single-cell tracking		Simulation				Simulation
Dose	Scrambled	p53 RNAi	Scrambled	p53 RNAi		Dose	Scrambled	p53 RNAi
[truncated: 15 more rows]

## Sheet: DNA break p53-responses (e) 
DNA break etc vs p53-responses
[truncated: 967 more rows]
