# Supplementary material for: Empirical single-cell tracking and cell-fate simulation reveal dual roles of p53 in tumor suppression
Source: eLife. 2022 Sep 20;11:e72498. doi: 10.7554/eLife.72498 (PMC9560164; doi:10.7554/eLife.72498)
Supplement: Figure 11—source data 1. — Data used in Figure 11. [file elife-72498-fig11-data1.xlsx]

## Sheet: Figure 11
	Number of bipolar cell division						Number of multipolar cell division						Number of progeny that can undergo bipolar cell division within the progeny generated by multiple cell division								Number of bipolar cell division						Number of multipolar cell division						Number of progeny that can undergo bipolar cell division within the progeny generated by multiple cell division
Time min x10	Control-sim	Control-sim	Control-sim	Control-sim	Control-sim	Average	Control-sim	Control-sim	Control-sim	Control-sim	Control-sim	Average	Control-sim	Control-sim	Control-sim	Control-sim	Control-sim	Average		Time min x10	p53 RNAi-sim	p53 RNAi-sim	p53 RNAi-sim	p53 RNAi-sim	p53 RNAi-sim	Average	p53 RNAi-sim	p53 RNAi-sim	p53 RNAi-sim	p53 RNAi-sim	p53 RNAi-sim	Average	p53 RNAi-sim	p53 RNAi-sim	p53 RNAi-sim	p53 RNAi-sim	p53 RNAi-sim	Average
0	0	0	0	0	0	0	0	0	0	0	0	0	0	0	0	0	0	0		0	0	0	0	0	0	0	0	0	0	0	0	0	0	0	0	0	0	0
1	0	0	0	0	0	0	0	0	0	0	0	0	0	0	0	0	0	0		1	0	0	0	0	0	0	0	0	0	0	0	0	0	0	0	0	0	0
2	0	0	0	0	0	0	0	0	0	0	0	0	0	0	0	0	0	0		2	0	0	0	0	0	0	0	0	0	0	0	0	0	0	0	0	0	0
3	0	0	0	0	0	0	0	0	0	0	0	0	0	0	0	0	0	0		3	0	0	0	0	0	0	0	0	0	0	0	0	0	0	0	0	0	0
4	0	0	0	0	0	0	0	0	0	0	0	0	0	0	0	0	0	0		4	0	0	0	0	0	0	0	0	0	0	0	0	0	0	0	0	0	0
5	2	2	6	14	14	7.6	0	0	0	0	0	0	0	0	0	0	0	0		5	6	2	2	0	0	2	0	0	0	0	0	0	0	0	0	0	0	0
6	6	6	6	14	16	9.6	0	0	0	0	0	0	0	0	0	0	0	0		6	8	2	8	0	0	3.6	0	0	3	3	0	1.2	0	0	0	0	0	0
7	6	6	6	14	16	9.6	0	0	0	0	0	0	0	0	0	0	0	0		7	8	8	10	4	4	6.8	0	0	3	3	0	1.2	0	0	0	0	0	0
8	8	8	6	20	20	12.4	0	0	0	0	0	0	0	0	0	0	0	0		8	18	14	24	10	10	15.2	3	0	3	3	3	2.4	0	0	0	0	0	0
9	18	18	16	26	32	22	0	0	0	0	0	0	0	0	0	0	0	0		9	26	18	32	20	20	23.2	5	0	3	3	3	2.8	0	0	0	0	0	0
10	24	24	16	30	32	25.2	0	0	0	0	0	0	0	0	0	0	0	0		10	26	18	32	20	20	23.2	5	0	3	3	3	2.8	0	0	0	0	0	0
11	34	34	16	40	38	32.4	0	0	0	0	0	0	0	0	0	0	0	0		11	26	18	32	20	20	23.2	5	0	3	3	3	2.8	0	0	0	0	0	0
12	36	36	22	42	40	35.2	0	0	0	0	0	0	0	0	0	0	0	0		12	26	22	34	24	24	26	5	0	3	3	3	2.8	0	0	0	0	0	0
13	36	36	22	42	40	35.2	0	0	0	0	0	0	0	0	0	0	0	0		13	28	26	36	26	26	28.4	5	0	3	3	3	2.8	0	0	0	0	0	0
14	40	40	24	42	44	38	0	0	0	0	0	0	0	0	0	0	0	0		14	28	30	36	34	34	32.4	5	0	3	3	3	2.8	0	0	0	0	0	0
15	40	40	24	42	44	38	0	0	0	0	0	0	0	0	0	0	0	0		15	28	30	36	34	34	32.4	5	0	3	3	3	2.8	0	0	0	0	0	0
16	40	40	24	42	44	38	0	0	0	0	0	0	0	0	0	0	0	0		16	32	32	38	38	38	35.6	5	0	3	3	3	2.8	0	0	0	0	0	0
17	40	40	24	42	44	38	0	0	0	0	0	0	0	0	0	0	0	0		17	32	32	38	38	38	35.6	5	0	3	3	3	2.8	0	0	0	0	0	0
18	40	40	24	42	44	38	0	0	0	0	0	0	0	0	0	0	0	0		18	36	42	44	44	44	42	8	0	6	6	3	4.6	0	0	0	0	0	0
19	42	42	24	48	48	40.8	0	0	0	0	0	0	0	0	0	0	0	0		19	38	42	48	44	44	43.2	8	0	6	6	3	4.6	0	0	0	0	0	0
20	46	46	30	50	52	44.8	0	0	0	0	0	0	0	0	0	0	0	0		20	38	42	48	44	44	43.2	8	0	6	6	3	4.6	0	0	0	0	0	0
21	52	52	34	56	54	49.6	0	0	0	0	0	0	0	0	0	0	0	0		21	38	42	48	44	44	43.2	8	0	6	6	3	4.6	0	0	0	0	0	0
22	60	60	50	60	58	57.6	0	0	0	0	0	0	0	0	0	0	0	0		22	42	46	48	50	50	47.2	8	0	6	6	3	4.6	0	0	0	0	0	0
23	68	68	60	76	68	68	0	0	0	0	0	0	0	0	0	0	0	0		23	46	52	52	54	54	51.6	8	0	6	6	3	4.6	0	0	0	0	0	0
24	68	68	60	76	68	68	0	0	0	0	0	0	0	0	0	0	0	0		24	48	52	56	54	54	52.8	8	0	6	6	3	4.6	0	0	0	0	0	0
25	68	68	60	76	68	68	0	0	0	0	0	0	0	0	0	0	0	0		25	50	52	56	54	54	53.2	8	0	6	6	3	4.6	0	0	0	0	0	0
26	74	74	62	92	76	75.6	0	0	0	0	0	0	0	0	0	0	0	0		26	50	52	56	54	54	53.2	8	0	6	6	3	4.6	0	0	0	0	0	0
27	74	74	62	92	76	75.6	0	0	0	0	0	0	0	0	0	0	0	0		27	64	58	58	62	62	60.8	8	0	6	6	3	4.6	0	0	0	0	0	0
28	76	76	62	98	88	80	0	0	0	0	0	0	0	0	0	0	0	0		28	64	62	60	62	62	62	8	0	6	6	3	4.6	0	0	0	0	0	0
29	76	76	62	98	88	80	0	0	0	0	0	0	0	0	0	0	0	0		29	64	62	60	62	62	62	8	0	6	6	3	4.6	0	0	0	0	0	0
30	76	76	62	98	88	80	0	0	0	0	0	0	0	0	0	0	0	0		30	68	65	60	64	64	64.2	8	0	6	6	3	4.6	0	0	0	0	0	0
31	76	76	62	98	88	80	0	0	0	0	0	0	0	0	0	0	0	0		31	68	65	60	64	64	64.2	8	0	6	6	3	4.6	0	0	0	0	0	0
32	76	76	62	98	88	80	0	0	0	0	0	0	0	0	0	0	0	0		32	68	65	60	64	64	64.2	8	0	6	6	3	4.6	0	0	0	0	0	0
33	78	78	62	102	90	82	0	0	0	0	0	0	0	0	0	0	0	0		33	68	65	60	68	68	65.8	8	0	5	5	3	4.2	0	0	0	0	0	0
34	78	78	62	102	90	82	0	0	0	0	0	0	0	0	0	0	0	0		34	68	65	62	70	70	67	8	0	5	5	3	4.2	0	0	0	0	0	0
35	78	78	62	102	90	82	0	0	0	0	0	0	0	0	0	0	0	0		35	68	65	62	70	70	67	8	0	5	5	3	4.2	0	0	0	0	0	0
36	78	78	62	102	90	82	0	0	0	0	0	0	0	0	0	0	0	0		36	68	65	62	70	70	67	8	0	5	5	3	4.2	0	0	0	0	0	0
37	78	78	68	112	98	86.8	0	0	0	0	0	0	0	0	0	0	0	0		37	68	65	62	70	70	67	8	0	5	5	3	4.2	0	0	0	0	0	0
38	92	92	76	120	102	96.4	0	0	0	0	0	0	0	0	0	0	0	0		38	70	65	65	74	74	69.6	8	0	5	5	3	4.2	0	0	0	0	0	0
39	92	92	76	122	108	98	0	0	0	0	0	0	0	0	0	0	0	0		39	76	65	69	76	76	72.4	8	0	5	5	3	4.2	0	0	0	0	0	0
40	94	94	78	122	108	99.2	0	0	0	0	0	0	0	0	0	0	0	0		40	80	65	69	78	78	74	8	0	5	5	3	4.2	0	0	0	0	0	0
41	98	98	82	126	110	102.8	0	0	0	0	0	0	0	0	0	0	0	0		41	84	69	75	84	84	79.2	8	0	5	5	3	4.2	0	0	0	0	0	0
42	98	98	82	128	112	103.6	0	0	0	0	0	0	0	0	0	0	0	0		42	84	69	75	84	84	79.2	8	0	5	5	3	4.2	0	0	0	0	0	0
43	98	98	82	128	112	103.6	0	0	0	0	0	0	0	0	0	0	0	0		43	90	71	77	86	86	82	8	0	5	5	3	4.2	0	0	0	0	0	0
44	106	106	86	128	114	108	0	0	0	0	0	0	0	0	0	0	0	0		44	94	75	83	88	88	85.6	8	0	5	5	3	4.2	0	0	0	0	0	0
45	108	108	86	130	114	109.2	0	0	0	0	0	0	0	0	0	0	0	0		45	100	87	87	90	90	90.8	8	0	5	5	3	4.2	0	0	0	0	0	0
46	116	116	90	130	114	113.2	0	0	0	0	0	0	0	0	0	0	0	0		46	100	87	87	90	90	90.8	8	0	5	5	3	4.2	0	0	0	0	0	0
47	124	124	94	138	120	120	0	0	0	0	0	0	0	0	0	0	0	0		47	100	87	87	90	90	90.8	8	0	4	4	3	3.8	0	0	0	0	0	0
48	128	128	98	142	132	125.6	0	0	0	0	0	0	0	0	0	0	0	0		48	104	91	93	96	96	96	8	0	4	4	3	3.8	0	0	0	0	0	0
49	134	134	98	144	132	128.4	0	0	0	0	0	0	0	0	0	0	0	0		49	103	91	93	96	96	95.8	7	0	4	4	3	3.6	0	0	0	0	0	0
50	138	138	102	148	134	132	0	0	0	0	0	0	0	0	0	0	0	0		50	103	91	93	96	96	95.8	7	0	4	4	3	3.6	0	0	0	0	0	0
51	150	150	104	152	136	138.4	0	0	0	0	0	0	0	0	0	0	0	0		51	111	99	101	106	106	104.6	7	0	4	4	3	3.6	0	0	0	0	0	0
52	150	150	104	152	136	138.4	0	0	0	0	0	0	0	0	0	0	0	0		52	111	99	101	106	106	104.6	7	0	3	3	3	3.2	0	0	0	0	0	0
53	156	156	104	154	142	142.4	0	0	0	0	0	0	0	0	0	0	0	0		53	111	101	101	108	108	105.8	7	0	3	3	3	3.2	0	0	0	0	0	0
54	160	160	108	156	150	146.8	0	0	0	0	0	0	0	0	0	0	0	0		54	119	109	113	114	114	113.8	6	0	3	3	3	3	0	0	0	0	0	0
55	164	164	110	156	156	150	0	0	0	0	0	0	0	0	0	0	0	0		55	125	111	117	120	120	118.6	6	0	3	3	3	3	0	0	0	0	0	0
56	168	168	116	164	158	154.8	0	0	0	0	0	0	0	0	0	0	0	0		56	129	111	123	120	120	120.6	6	0	3	3	3	3	0	0	0	0	0	0
57	168	168	116	164	158	154.8	0	0	0	0	0	0	0	0	0	0	0	0		57	129	119	127	124	124	124.6	6	0	3	3	3	3	0	0	0	0	0	0
58	172	172	118	164	164	158	0	0	0	0	0	0	0	0	0	0	0	0		58	141	125	133	129	129	131.4	6	0	3	3	3	3	0	0	0	0	0	0
59	172	172	118	164	164	158	0	0	0	0	0	0	0	0	0	0	0	0		59	141	129	133	129	129	132.2	6	0	3	3	3	3	0	0	0	0	0	0
60	176	176	118	168	170	161.6	0	0	0	0	0	0	0	0	0	0	0	0		60	149	141	135	139	139	140.6	6	3	3	3	3	3.6	0	0	0	0	0	0
61	179	179	120	170	174	164.4	0	0	0	0	0	0	0	0	0	0	0	0		61	153	141	137	140	140	142.2	6	3	3	3	3	3.6	0	0	0	0	0	0
62	179	179	120	170	174	164.4	0	0	0	0	0	0	0	0	0	0	0	0		62	157	145	141	142	142	145.4	6	3	2	2	6	3.8	0	0	0	0	0	0
63	183	183	120	172	174	166.4	0	0	0	0	0	0	0	0	0	0	0	0		63	167	155	151	158	158	157.8	6	3	2	2	6	3.8	0	0	0	0	0	0
64	187	187	120	180	180	170.8	0	0	0	0	0	0	0	0	0	0	0	0		64	169	157	155	166	166	162.6	6	3	2	2	6	3.8	0	0	0	0	0	0
65	193	193	120	182	188	175.2	0	0	0	0	0	0	0	0	0	0	0	0		65	169	157	155	166	166	162.6	6	3	2	2	6	3.8	0	0	0	0	0	0
66	193	193	132	188	190	179.2	0	0	0	0	0	0	0	0	0	0	0	0		66	175	168	161	174	174	170.4	6	6	2	2	6	4.4	0	0	0	0	0	0
67	196	197	136	190	194	182.6	0	0	0	0	0	0	0	0	0	0	0	0		67	175	172	167	184	184	176.4	6	6	2	2	6	4.4	0	0	0	0	0	0
68	196	197	142	200	200	187	0	0	0	0	0	0	0	0	0	0	0	0		68	185	182	175	188	188	183.6	6	6	2	2	6	4.4	0	0	0	0	0	0
69	204	205	150	206	210	195	0	0	0	0	0	0	0	0	0	0	0	0		69	185	182	175	188	188	183.6	6	6	2	2	6	4.4	0	0	0	0	0	0
70	220	221	160	208	222	206.2	0	0	0	0	0	0	0	0	0	0	0	0		70	186	190	185	192	192	189	6	6	2	2	6	4.4	0	0	0	0	0	0
71	220	221	160	208	222	206.2	0	0	0	0	0	0	0	0	0	0	0	0		71	185	190	187	196	196	190.8	6	6	2	2	6	4.4	0	0	0	0	0	0
72	220	221	160	208	222	206.2	0	0	0	0	0	0	0	0	0	0	0	0		72	187	198	195	202	202	196.8	6	6	2	2	6	4.4	0	0	0	0	0	0
73	220	221	160	208	222	206.2	0	0	0	0	0	0	0	0	0	0	0	0		73	187	198	195	202	202	196.8	6	6	2	2	6	4.4	0	0	0	0	0	0
74	224	225	170	212	230	212.2	0	0	0	0	0	0	0	0	0	0	0	0		74	191	202	203	202	202	200	6	6	2	2	6	4.4	0	0	0	0	0	0
75	230	231	176	220	238	219	0	0	0	0	0	0	0	0	0	0	0	0		75	193	202	206	204	204	201.8	6	6	2	2	6	4.4	0	0	0	0	0	0
76	232	233	180	222	242	221.8	0	0	0	0	0	0	0	0	0	0	0	0		76	197	212	220	216	216	212.2	6	6	2	2	6	4.4	0	0	0	0	0	0
77	232	233	180	222	242	221.8	0	0	0	0	0	0	0	0	0	0	0	0		77	205	216	224	218	218	216.2	6	6	2	2	6	4.4	0	0	0	0	0	0
78	232	233	182	226	246	223.8	0	0	0	0	0	0	0	0	0	0	0	0		78	205	216	224	218	218	216.2	6	6	2	2	5	4.2	0	0	0	0	0	0
79	232	233	182	226	246	223.8	0	0	0	0	0	0	0	0	0	0	0	0		79	209	222	232	222	222	221.4	6	6	2	2	5	4.2	0	0	0	0	0	0
80	232	233	188	228	250	226.2	0	0	0	0	0	0	0	0	0	0	0	0		80	209	224	232	224	224	222.6	6	6	2	2	5	4.2	0	0	0	0	0	0
81	231	232	188	228	250	225.8	0	0	0	0	0	0	0	0	0	0	0	0		81	209	224	232	223	223	222.2	6	6	2	2	5	4.2	0	0	0	0	0	0
82	235	236	187	234	256	229.6	0	0	0	0	0	0	0	0	0	0	0	0		82	217	226	234	225	225	225.4	6	4	2	2	7	4.2	0	0	0	0	0	0
83	239	240	187	236	258	232	0	0	0	0	0	0	0	0	0	0	0	0		83	217	228	236	225	225	226.2	6	4	2	2	7	4.2	0	0	0	0	0	0
84	239	240	187	236	258	232	0	0	0	0	0	0	0	0	0	0	0	0		84	219	228	236	227	227	227.4	6	4	2	2	7	4.2	0	0	0	0	0	0
85	241	242	193	242	262	236	0	0	0	0	0	0	0	0	0	0	0	0		85	219	228	238	227	227	227.8	6	4	2	2	7	4.2	0	0	0	0	0	0
86	243	244	197	246	264	238.8	0	0	0	0	0	0	0	0	0	0	0	0		86	225	232	248	231	231	233.4	6	4	2	2	7	4.2	0	0	0	0	0	0
87	248	249	197	248	264	241.2	0	0	0	0	0	0	0	0	0	0	0	0		87	227	238	250	235	235	237	6	3	2	2	7	4	0	0	0	0	0	0
88	248	249	197	248	264	241.2	0	0	0	0	0	0	0	0	0	0	0	0		88	227	238	250	235	235	237	6	3	2	2	7	4	0	0	0	0	0	0
89	256	257	203	254	268	247.6	0	0	0	0	0	0	0	0	0	0	0	0		89	230	242	252	237	237	239.6	6	3	2	2	7	4	0	0	0	0	0	0
90	264	265	209	258	268	252.8	0	0	0	0	0	0	0	0	0	0	0	0		90	234	248	258	242	242	244.8	6	3	5	5	7	5.2	0	0	0	0	0	0
91	264	265	209	258	268	252.8	0	0	0	0	0	0	0	0	0	0	0	0		91	236	248	266	242	242	246.8	6	3	5	5	7	5.2	0	0	0	0	0	0
92	264	265	209	258	268	252.8	0	0	0	0	0	0	0	0	0	0	0	0		92	242	252	266	250	250	252	6	3	5	5	7	5.2	0	0	0	0	0	0
93	278	279	215	260	270	260.4	0	0	0	0	0	0	0	0	0	0	0	0		93	242	256	270	254	254	255.2	6	3	5	5	7	5.2	0	0	0	0	0	0
94	278	279	215	260	270	260.4	0	0	0	0	0	0	0	0	0	0	0	0		94	241	260	272	254	254	256.2	6	3	5	5	7	5.2	0	0	0	0	0	0
95	278	279	215	266	280	263.6	0	0	0	0	0	0	0	0	0	0	0	0		95	240	260	272	254	254	256	5	3	5	5	7	5	0	0	0	0	0	0
96	286	287	217	270	284	268.8	0	0	0	0	0	0	0	0	0	0	0	0		96	243	260	271	256	256	257.2	5	3	5	5	7	5	0	0	0	0	0	0
97	288	289	227	270	286	272	0	0	0	0	0	0	0	0	0	0	0	0		97	247	264	271	258	258	259.6	5	3	5	5	7	5	0	0	0	0	0	0
98	292	293	235	270	288	275.6	0	0	0	0	0	0	0	0	0	0	0	0		98	247	264	275	258	258	260.4	8	3	5	5	7	5.6	0	0	0	0	0	0
99	296	297	239	276	288	279.2	0	0	0	0	0	0	0	0	0	0	0	0		99	257	266	283	262	262	266	8	3	5	5	7	5.6	0	0	0	0	0	0
100	302	303	249	286	298	287.6	0	0	0	0	0	0	0	0	0	0	0	0		100	263	270	289	270	270	272.4	8	3	5	5	10	6.2	0	0	0	0	0	0
101	302	303	251	286	302	288.8	0	0	0	0	0	0	0	0	0	0	0	0		101	263	270	289	270	270	272.4	8	3	5	5	10	6.2	0	0	0	0	0	0
102	302	303	251	286	302	288.8	0	0	0	0	0	0	0	0	0	0	0	0		102	269	278	293	276	276	278.4	8	3	5	5	10	6.2	0	0	0	0	0	0
103	304	305	259	292	310	294	0	0	0	0	0	0	0	0	0	0	0	0		103	269	280	295	280	280	280.8	8	3	5	5	10	6.2	0	0	0	0	0	0
104	304	305	259	292	310	294	0	0	0	0	0	0	0	0	0	0	0	0		104	273	284	297	286	286	285.2	8	3	5	5	10	6.2	0	0	0	0	0	0
105	306	307	265	300	320	299.6	0	0	0	0	0	0	0	0	0	0	0	0		105	279	292	305	290	290	291.2	8	3	8	8	10	7.4	0	0	0	0	0	0
106	308	309	271	308	330	305.2	0	0	0	0	0	0	0	0	0	0	0	0		106	281	298	307	290	290	293.2	8	6	8	8	10	8	0	0	0	0	0	0
107	308	309	271	308	330	305.2	0	0	0	0	0	0	0	0	0	0	0	0		107	288	304	311	299	299	300.2	8	6	8	8	10	8	0	0	0	0	0	0
108	316	317	277	318	340	313.6	0	0	0	0	0	0	0	0	0	0	0	0		108	292	306	311	301	301	302.2	8	6	8	8	10	8	0	0	0	0	0	0
109	322	323	287	324	342	319.6	0	0	0	0	0	0	0	0	0	0	0	0		109	294	314	313	307	307	307	8	6	8	8	9	7.8	0	0	0	0	0	0
110	323	325	289	324	346	321.4	0	0	0	0	0	0	0	0	0	0	0	0		110	306	316	317	319	319	315.4	8	6	8	8	9	7.8	0	0	0	0	0	0
111	323	324	289	324	345	321	0	0	0	0	0	0	0	0	0	0	0	0		111	308	324	319	322	322	319	8	6	8	8	9	7.8	0	0	0	0	0	0
112	323	324	289	324	345	321	0	0	0	0	0	0	0	0	0	0	0	0		112	308	332	329	336	336	328.2	8	6	8	8	11	8.2	0	0	0	0	0	0
113	323	324	289	324	345	321	0	0	0	0	0	0	0	0	0	0	0	0		113	308	336	337	338	338	331.4	8	6	8	8	11	8.2	0	0	0	0	0	0
114	323	324	289	324	345	321	0	0	0	0	0	0	0	0	0	0	0	0		114	316	348	351	346	346	341.4	8	6	8	8	10	8	0	0	0	0	0	0
115	331	332	291	332	349	327	0	0	0	0	0	0	0	0	0	0	0	0		115	320	350	353	345	345	342.6	8	6	8	8	10	8	0	0	0	0	0	0
116	331	332	291	332	349	327	0	0	0	0	0	0	0	0	0	0	0	0		116	326	355	367	353	353	350.8	8	6	8	8	10	8	0	0	0	0	0	0
117	333	334	297	332	357	330.6	0	0	0	0	0	0	0	0	0	0	0	0		117	328	371	373	363	363	359.6	8	6	8	8	10	8	0	0	0	0	0	0
118	333	334	297	332	357	330.6	0	0	0	0	0	0	0	0	0	0	0	0		118	336	379	375	367	367	364.8	8	6	8	8	10	8	0	0	0	0	0	0
119	349	350	303	336	365	340.6	0	0	0	0	0	0	0	0	0	0	0	0		119	348	387	379	379	379	374.4	7	6	8	8	10	7.8	0	0	0	0	0	0
120	359	360	307	342	367	347	0	0	0	0	0	0	0	0	0	0	0	0		120	356	399	387	381	381	380.8	7	6	8	8	10	7.8	0	0	0	0	0	0
121	371	372	329	346	375	358.6	0	0	0	0	0	0	0	0	0	0	0	0		121	360	405	393	385	385	385.6	7	6	8	8	10	7.8	0	0	0	0	0	0
122	371	372	331	348	379	360.2	0	0	0	0	0	0	0	0	0	0	0	0		122	360	405	393	385	385	385.6	7	6	8	8	10	7.8	0	0	0	0	0	0
123	371	372	335	352	383	362.6	0	0	0	0	0	0	0	0	0	0	0	0		123	370	417	404	393	393	395.4	7	6	8	8	10	7.8	0	0	0	0	0	0
124	377	378	339	356	387	367.4	0	0	0	0	0	0	0	0	0	0	0	0		124	370	416	404	393	393	395.2	7	6	8	8	10	7.8	0	0	0	0	0	0
125	383	384	345	362	391	373	0	0	0	0	0	0	0	0	0	0	0	0		125	378	419	408	400	400	401	7	6	8	8	10	7.8	0	0	0	0	0	0
126	385	386	353	369	393	377.2	0	0	0	0	0	0	0	0	0	0	0	0		126	386	420	411	410	410	407.4	7	9	8	8	10	8.4	0	0	0	0	0	0
127	389	390	357	377	395	381.6	0	0	0	0	0	0	0	0	0	0	0	0		127	386	420	411	410	410	407.4	7	9	8	8	10	8.4	0	0	0	0	0	0
128	391	392	365	381	407	387.2	0	0	0	0	0	0	0	0	0	0	0	0		128	392	428	419	420	420	415.8	7	9	8	8	13	9	0	0	0	0	0	0
129	395	396	377	383	414	393	0	0	0	0	0	0	0	0	0	0	0	0		129	396	427	423	422	422	418	7	9	8	8	13	9	0	0	0	0	0	0
130	402	403	379	391	414	397.8	0	0	0	0	0	0	0	0	0	0	0	0		130	402	427	427	430	430	423.2	7	15	8	8	13	10.2	0	0	0	0	0	0
131	402	403	387	397	418	401.4	0	0	0	0	0	0	0	0	0	0	0	0		131	404	428	427	434	434	425.4	7	15	8	8	13	10.2	0	0	0	0	0	0
132	412	413	397	412	429	412.6	0	0	0	0	0	0	0	0	0	0	0	0		132	408	438	431	438	438	430.6	7	15	8	8	13	10.2	0	0	0	0	0	0
133	423	424	404	420	439	422	0	0	0	0	0	0	0	0	0	0	0	0		133	412	450	433	440	440	435	7	15	8	8	13	10.2	0	0	0	0	0	0
134	431	432	412	423	441	427.8	0	0	0	0	0	0	0	0	0	0	0	0		134	415	456	445	443	443	440.4	7	15	8	8	13	10.2	0	0	0	0	0	0
135	437	438	420	433	451	435.8	0	0	0	0	0	0	0	0	0	0	0	0		135	419	468	453	451	451	448.4	7	15	8	8	13	10.2	0	0	0	0	0	0
136	443	444	426	433	459	441	0	0	0	0	0	0	0	0	0	0	0	0		136	423	472	459	453	453	452	7	15	8	8	13	10.2	0	0	0	0	0	0
137	447	448	436	439	459	445.8	0	0	0	0	0	0	0	0	0	0	0	0		137	435	478	466	467	467	462.6	7	15	8	8	18	11.2	0	0	0	0	0	0
138	448	448	436	438	460	446	0	0	0	0	0	0	0	0	0	0	0	0		138	440	479	482	475	475	470.2	7	15	11	11	18	12.4	0	0	0	0	0	0
139	450	450	441	440	460	448.2	0	0	0	0	0	0	0	0	0	0	0	0		139	444	481	484	483	483	475	7	15	11	11	18	12.4	0	0	0	0	0	0
140	454	454	447	444	462	452.2	0	0	0	0	0	0	0	0	0	0	0	0		140	445	485	487	483	483	476.6	9	15	14	14	18	14	0	0	0	0	0	0
141	457	457	447	446	464	454.2	0	0	0	0	0	0	0	0	0	0	0	0		141	445	485	485	489	489	478.6	9	15	14	14	18	14	0	0	0	0	0	0
142	463	463	449	446	472	458.6	0	0	0	0	0	0	0	0	0	0	0	0		142	458	489	495	503	503	489.6	9	15	14	14	17	13.8	0	0	0	0	0	0
143	469	469	456	449	483	465.2	0	0	0	0	0	0	0	0	0	0	0	0		143	458	489	495	503	503	489.6	9	15	14	14	17	13.8	0	0	0	0	0	0
144	473	473	466	457	491	472	0	0	0	0	0	0	0	0	0	0	0	0		144	461	491	499	505	505	492.2	9	15	14	14	17	13.8	0	0	0	0	0	0
145	474	474	468	457	491	472.8	0	0	0	0	0	0	0	0	0	0	0	0		145	465	503	501	506	506	496.2	9	15	14	14	17	13.8	0	0	0	0	0	0
146	477	477	468	457	498	475.4	0	0	0	0	0	0	0	0	0	0	0	0		146	473	505	506	512	512	501.6	9	14	13	13	17	13.2	0	0	0	0	0	0
147	477	477	468	457	498	475.4	0	0	0	0	0	0	0	0	0	0	0	0		147	473	505	506	512	512	501.6	9	14	13	13	17	13.2	0	0	0	0	0	0
148	479	479	468	461	498	477	0	0	0	0	0	0	0	0	0	0	0	0		148	479	513	512	522	522	509.6	9	14	13	13	20	13.8	0	0	0	0	0	0
149	481	481	472	468	500	480.4	0	0	0	0	0	0	0	0	0	0	0	0		149	488	521	520	525	525	515.8	9	14	13	13	20	13.8	0	0	0	0	0	0
150	482	482	473	468	500	481	0	0	0	0	0	0	0	0	0	0	0	0		150	500	535	524	538	538	527	12	14	13	13	20	14.4	0	0	0	0	0	0
151	488	488	475	468	504	484.6	0	0	0	0	0	0	0	0	0	0	0	0		151	508	547	529	544	544	534.4	12	13	13	13	23	14.8	0	0	0	0	0	0
152	492	492	479	470	508	488.2	0	0	0	0	0	0	0	0	0	0	0	0		152	514	556	539	552	552	542.6	12	13	12	12	23	14.4	0	0	0	0	0	0
153	494	494	479	470	510	489.4	0	0	0	0	0	0	0	0	0	0	0	0		153	524	556	545	564	564	550.6	12	13	12	12	23	14.4	0	0	0	0	0	0
154	502	502	483	478	522	497.4	0	0	0	0	0	0	0	0	0	0	0	0		154	528	560	552	568	568	555.2	12	13	12	12	23	14.4	0	0	0	0	0	0
155	505	505	486	478	525	499.8	0	0	0	0	0	0	0	0	0	0	0	0		155	533	571	559	577	577	563.4	12	12	12	12	23	14.2	0	0	0	0	0	0
156	517	517	494	492	536	511.2	0	0	0	0	0	0	0	0	0	0	0	0		156	535	573	559	578	578	564.6	12	12	12	12	23	14.2	0	0	0	0	0	0
157	529	529	504	497	550	521.8	0	0	0	0	0	0	0	0	0	0	0	0		157	535	572	559	580	580	565.2	12	12	11	11	23	13.8	0	0	0	0	0	0
158	529	529	504	497	552	522.2	0	0	0	0	0	0	0	0	0	0	0	0		158	536	582	560	582	582	568.4	12	12	11	11	23	13.8	0	0	0	0	0	0
159	533	533	505	501	558	526	0	0	0	0	0	0	0	0	0	0	0	0		159	544	583	563	585	585	572	12	12	11	11	23	13.8	0	0	0	0	0	0
160	537	536	509	509	561	530.4	0	0	0	0	0	0	0	0	0	0	0	0		160	544	583	563	585	585	572	12	11	11	11	23	13.6	0	0	0	0	0	0
161	539	538	514	520	571	536.4	0	0	0	0	0	0	0	0	0	0	0	0		161	549	585	575	594	594	579.4	12	11	14	14	23	14.8	0	0	0	0	0	0
162	553	551	524	528	581	547.4	0	0	0	0	0	0	0	0	0	0	0	0		162	553	591	577	599	599	583.8	12	11	14	14	23	14.8	0	0	0	0	0	0
163	553	551	526	530	583	548.6	0	0	0	0	0	0	0	0	0	0	0	0		163	556	599	580	601	601	587.4	12	11	14	14	23	14.8	0	0	0	0	0	0
164	553	551	527	531	583	549	0	0	0	0	0	0	0	0	0	0	0	0		164	558	600	584	603	603	589.6	12	11	14	14	22	14.6	0	0	0	0	0	0
165	561	559	533	536	589	555.6	0	0	0	0	0	0	0	0	0	0	0	0		165	558	600	586	605	605	590.8	12	11	14	14	22	14.6	0	0	0	0	0	0
166	561	559	533	537	589	555.8	0	0	0	0	0	0	0	0	0	0	0	0		166	558	599	588	605	605	591	12	11	14	14	22	14.6	0	0	0	0	0	0
167	561	559	538	541	589	557.6	0	0	0	0	0	0	0	0	0	0	0	0		167	558	599	588	606	606	591.4	12	11	14	14	22	14.6	0	0	0	0	0	0
168	569	567	547	553	593	565.8	3	3	0	0	0	1.2	0	0	0	0	0	0		168	562	605	592	612	612	596.6	11	10	14	14	22	14.2	0	0	0	0	0	0
169	572	569	549	552	593	567	3	3	0	0	0	1.2	0	0	0	0	0	0		169	569	606	592	618	618	600.6	14	10	13	13	22	14.4	0	0	0	0	0	0
170	574	571	550	552	595	568.4	3	3	0	0	0	1.2	0	0	0	0	0	0		170	575	606	600	623	623	605.4	14	10	13	13	21	14.2	0	0	0	0	0	0
171	575	573	550	553	597	569.6	3	3	0	0	0	1.2	0	0	0	0	0	0		171	585	608	601	625	625	608.8	14	13	13	13	21	14.8	0	0	0	0	0	0
172	582	579	562	565	606	578.8	3	3	0	0	0	1.2	0	0	0	0	0	0		172	589	612	609	626	626	612.4	14	13	13	13	21	14.8	0	0	0	0	0	0
173	584	581	563	564	608	580	6	6	0	0	0	2.4	0	0	0	0	0	0		173	603	619	616	633	633	620.8	13	12	13	13	21	14.4	0	0	0	0	0	0
174	584	581	563	566	610	580.8	6	6	0	0	0	2.4	0	0	0	0	0	0		174	617	631	628	635	635	629.2	16	12	13	13	21	15	0	0	0	0	0	0
175	584	581	566	567	610	581.6	6	6	3	0	0	3	0	0	0	0	0	0		175	617	631	629	635	635	629.4	16	12	13	13	19	14.6	0	0	0	0	0	0
176	585	582	567	569	612	583	6	6	3	0	0	3	0	0	0	0	0	0		176	618	632	630	636	636	630.4	16	12	13	13	19	14.6	0	0	0	0	0	0
177	595	590	572	577	612	589.2	5	5	3	0	0	2.6	0	0	0	0	0	0		177	619	635	631	638	638	632.2	16	12	13	13	19	14.6	0	0	0	0	0	0
178	601	596	577	579	626	595.8	5	5	3	0	0	2.6	0	0	0	0	0	0		178	626	643	636	642	642	637.8	19	12	13	13	19	15.2	0	0	0	0	0	0
179	604	599	586	579	627	599	5	5	3	0	0	2.6	0	0	0	0	0	0		179	636	645	644	644	644	642.6	19	12	13	13	19	15.2	0	0	0	0	0	0
180	608	603	589	579	631	602	5	5	3	0	0	2.6	0	0	0	0	0	0		180	642	649	646	648	648	646.6	19	12	13	13	18	15	0	0	0	0	0	0
181	616	610	591	583	634	606.8	5	5	3	0	0	2.6	0	0	0	0	0	0		181	647	649	650	653	653	650.4	19	12	12	12	18	14.6	0	0	0	0	0	0
182	617	612	601	584	639	610.6	3	3	3	0	0	1.8	0	0	0	0	0	0		182	656	652	650	655	655	653.6	19	12	12	12	18	14.6	0	0	0	0	0	0
183	630	624	607	600	654	623	3	3	3	0	0	1.8	0	0	0	0	0	0		183	658	664	653	655	655	657	19	11	12	12	18	14.4	0	0	0	0	0	0
184	634	628	616	603	664	629	3	3	2	0	0	1.6	0	0	0	0	0	0		184	660	677	657	656	656	661.2	20	11	12	12	18	14.6	0	0	0	0	0	0
185	635	629	621	609	665	631.8	3	3	2	0	0	1.6	0	0	0	0	0	0		185	662	680	658	656	656	662.4	20	11	12	12	18	14.6	0	0	0	0	0	0
186	637	632	626	613	674	636.4	3	3	2	0	3	2.2	0	0	0	0	0	0		186	663	677	659	656	656	662.2	20	11	11	11	18	14.2	0	0	0	0	0	0
187	643	640	636	621	681	644.2	2	2	2	0	3	1.8	0	0	0	0	0	0		187	665	677	660	656	656	662.8	20	11	11	11	18	14.2	0	0	0	0	0	0
188	646	643	638	621	682	646	2	2	2	0	3	1.8	0	0	0	0	0	0		188	666	680	662	657	657	664.4	20	11	14	14	18	15.4	0	0	0	0	0	0
189	646	644	642	623	684	647.8	2	2	1	0	3	1.6	0	0	0	0	0	0		189	668	681	663	658	658	665.6	20	11	14	14	18	15.4	0	0	0	0	0	0
190	649	647	646	633	694	653.8	2	2	1	0	3	1.6	0	0	0	0	0	0		190	669	681	663	659	659	666.2	19	11	14	14	18	15.2	0	0	0	0	0	0
191	654	651	651	636	700	658.4	2	2	1	0	3	1.6	0	0	0	0	0	0		191	670	681	667	660	660	667.6	17	11	14	14	18	14.8	0	0	0	0	0	0
192	658	655	651	637	701	660.4	2	2	1	0	3	1.6	0	0	0	0	0	0		192	670	682	667	662	662	668.6	17	11	13	13	18	14.4	0	0	0	0	0	0
193	658	655	651	639	701	660.8	2	2	1	0	3	1.6	0	0	0	0	0	0		193	671	683	667	663	663	669.4	17	11	13	13	18	14.4	0	0	0	0	0	0
194	659	656	651	640	703	661.8	2	2	1	0	3	1.6	0	0	0	0	0	0		194	671	685	670	664	664	670.8	17	11	13	13	18	14.4	0	0	0	0	0	0
195	660	656	657	642	707	664.4	2	2	1	0	2	1.4	0	0	0	0	0	0		195	671	690	676	672	672	676.2	17	11	13	13	18	14.4	0	0	0	0	0	0
196	668	663	667	645	715	671.6	2	2	1	0	2	1.4	0	0	0	0	0	0		196	672	696	676	677	677	679.6	16	11	13	13	18	14.2	0	0	0	0	0	0
197	673	669	668	647	724	676.2	2	2	1	0	2	1.4	0	0	0	0	0	0		197	673	696	677	677	677	680	16	11	12	12	18	13.8	0	0	0	0	0	0
198	673	669	669	650	725	677.2	2	2	1	0	2	1.4	0	0	0	0	0	0		198	675	698	682	679	679	682.6	16	11	13	13	18	14.2	0	0	2	2	0	0.8
199	682	678	673	656	740	685.8	2	2	1	0	2	1.4	0	0	0	0	0	0		199	675	698	684	681	681	683.8	16	11	13	13	18	14.2	0	0	2	2	0	0.8
200	685	680	676	659	743	688.6	2	2	1	3	1	1.8	0	0	0	0	0	0		200	675	698	684	683	683	684.6	15	11	13	13	20	14.4	0	0	2	2	0	0.8
201	689	683	677	661	745	691	2	2	1	3	1	1.8	0	0	0	0	0	0		201	677	700	685	684	684	686	15	11	13	13	20	14.4	0	0	2	2	0	0.8
202	697	691	678	667	750	696.6	2	2	1	3	1	1.8	0	0	0	0	0	0		202	679	699	689	684	684	687	15	11	13	13	20	14.4	0	0	2	2	0	0.8
203	700	696	679	668	750	698.6	2	2	1	3	1	1.8	0	0	0	0	0	0		203	680	702	692	688	688	690	15	11	13	13	20	14.4	0	0	2	2	0	0.8
204	702	698	682	673	750	701	2	2	1	3	1	1.8	0	0	0	0	0	0		204	684	702	694	690	690	692	15	11	13	13	19	14.2	0	0	2	2	0	0.8
205	702	698	683	674	751	701.6	2	2	1	3	1	1.8	0	0	0	0	0	0		205	684	704	694	692	692	693.2	14	14	13	13	19	14.6	0	0	2	2	0	0.8
206	710	705	689	689	757	710	2	2	1	3	1	1.8	0	0	0	0	0	0		206	688	706	704	696	696	698	14	14	13	13	19	14.6	0	0	2	2	0	0.8
207	712	708	689	694	758	712.2	2	2	1	3	1	1.8	0	0	0	0	0	0		207	689	712	713	704	704	704.4	13	16	12	12	19	14.4	0	0	2	2	0	0.8
208	714	710	690	698	761	714.6	2	2	1	3	1	1.8	0	0	0	0	0	0		208	696	713	713	706	706	706.8	13	16	12	12	19	14.4	0	0	2	2	0	0.8
209	714	710	691	698	765	715.6	2	2	1	2	4	2.2	0	0	0	0	0	0		209	698	714	714	706	706	707.6	12	16	12	12	18	14	0	0	2	2	0	0.8
210	720	715	696	703	765	719.8	2	2	1	2	4	2.2	0	0	0	0	0	0		210	708	723	717	710	710	713.6	12	19	12	12	18	14.6	0	0	2	2	0	0.8
211	722	717	698	706	766	721.8	2	2	1	2	4	2.2	0	0	0	0	0	0		211	717	726	726	716	716	720.2	12	19	12	12	18	14.6	0	0	2	2	0	0.8
212	725	718	698	708	767	723.2	2	2	1	2	4	2.2	0	0	0	0	0	0		212	721	730	730	718	718	723.4	12	19	12	12	18	14.6	0	0	2	2	0	0.8
213	729	722	702	708	767	725.6	2	2	4	2	4	2.8	0	0	0	0	0	0		213	729	735	734	719	719	727.2	15	19	12	12	17	15	0	0	2	2	0	0.8
214	729	723	706	709	771	727.6	2	2	4	1	4	2.6	0	0	0	0	0	0		214	730	735	736	722	722	729	15	19	12	12	16	14.8	0	0	2	2	0	0.8
215	730	725	709	709	774	729.4	2	2	4	1	4	2.6	0	0	0	0	0	0		215	737	737	745	731	731	736.2	15	19	12	12	17	15	0	0	2	2	0	0.8
216	731	726	714	713	776	732	2	2	4	1	4	2.6	0	0	0	0	0	0		216	739	741	750	742	742	742.8	18	19	14	14	17	16.4	0	0	2	2	0	0.8
217	737	733	716	717	779	736.4	2	2	4	1	4	2.6	0	0	0	0	0	0		217	741	743	758	750	750	748.4	18	19	14	14	17	16.4	0	0	2	2	0	0.8
218	738	734	725	718	781	739.2	2	2	4	1	3	2.4	0	0	0	0	0	0		218	742	744	760	752	752	750	18	19	13	13	16	15.8	0	0	2	2	0	0.8
219	743	739	725	722	790	743.8	2	2	4	1	3	2.4	0	0	0	0	0	0		219	743	744	762	756	756	752.2	18	19	13	13	16	15.8	0	0	2	2	0	0.8
220	746	745	736	727	793	749.4	2	2	4	1	3	2.4	0	0	0	0	0	0		220	745	744	764	757	757	753.4	18	19	13	13	16	15.8	0	0	2	2	0	0.8
221	748	749	739	728	795	751.8	2	2	4	1	3	2.4	0	0	0	0	0	0		221	746	747	765	757	757	754.4	18	19	13	13	16	15.8	0	0	2	2	0	0.8
222	749	752	741	730	797	753.8	2	2	3	1	3	2.2	0	0	0	0	0	0		222	751	750	769	762	762	758.8	18	19	13	13	16	15.8	0	0	2	2	0	0.8
223	755	757	745	733	801	758.2	2	2	3	1	2	2	0	0	0	0	0	0		223	752	751	768	764	764	759.8	18	19	13	13	16	15.8	0	0	2	2	0	0.8
224	761	761	756	738	800	763.2	2	2	3	1	2	2	0	0	0	0	0	0		224	755	754	769	767	767	762.4	18	19	13	13	16	15.8	0	0	2	2	0	0.8
225	767	767	758	745	803	768	2	2	3	4	2	2.6	0	0	0	0	0	0		225	754	755	770	773	773	765	18	19	13	13	16	15.8	0	0	2	2	0	0.8
226	769	772	762	749	804	771.2	2	5	3	4	2	3.2	0	0	0	0	0	0		226	755	754	772	775	775	766.2	18	18	13	13	16	15.6	0	0	2	2	0	0.8
227	771	776	769	754	817	777.4	2	5	2	4	2	3	0	0	0	0	0	0		227	756	754	774	777	777	767.6	18	17	13	13	16	15.4	0	0	2	2	0	0.8
228	780	786	775	766	826	786.6	2	5	2	4	2	3	0	0	0	0	0	0		228	755	755	779	778	778	769	18	17	13	13	16	15.4	0	0	2	2	0	0.8
229	783	789	785	770	832	791.8	2	5	2	4	2	3	0	0	0	0	0	0		229	757	756	783	779	779	770.8	18	17	13	13	16	15.4	0	0	2	2	0	0.8
230	785	793	787	771	833	793.8	2	5	2	4	2	3	0	0	0	0	0	0		230	759	758	789	779	779	772.8	17	17	13	13	16	15.2	0	0	2	2	0	0.8
231	786	794	787	777	836	796	2	5	2	4	2	3	0	0	0	0	0	0		231	760	761	791	786	786	776.8	17	17	13	13	16	15.2	0	0	2	2	0	0.8
232	787	797	789	780	838	798.2	2	5	2	7	2	3.6	0	0	0	0	0	0		232	760	759	792	787	787	777	17	16	13	13	16	15	0	0	2	2	0	0.8
233	789	799	793	780	844	801	2	5	2	7	2	3.6	0	0	0	0	0	0		233	761	759	794	790	790	778.8	17	15	13	13	16	14.8	0	0	2	2	0	0.8
234	799	809	795	782	848	806.6	2	5	2	6	2	3.4	0	0	0	0	0	0		234	765	761	797	795	795	782.6	17	15	13	13	19	15.4	0	0	2	2	0	0.8
235	805	813	796	785	851	810	2	4	2	6	2	3.2	0	0	0	0	0	0		235	767	767	797	796	796	784.6	17	15	13	13	19	15.4	0	0	2	2	0	0.8
236	811	819	802	787	859	815.6	2	4	2	6	2	3.2	0	0	0	0	0	0		236	770	769	799	798	798	786.8	17	14	13	13	19	15.2	0	0	2	2	0	0.8
237	813	822	802	789	861	817.4	2	4	2	6	2	3.2	0	0	0	0	0	0		237	773	772	804	801	801	790.2	17	14	13	13	19	15.2	0	0	2	2	0	0.8
238	814	823	807	794	866	820.8	2	4	2	6	2	3.2	0	0	0	0	0	0		238	783	781	812	808	808	798.4	17	13	13	13	19	15	0	0	2	2	0	0.8
239	823	833	811	801	869	827.4	2	4	2	5	2	3	0	0	0	0	0	0		239	788	785	817	810	810	802	17	13	13	13	19	15	0	0	2	2	0	0.8
240	824	834	813	802	873	829.2	2	3	2	5	2	2.8	0	0	0	0	0	0		240	792	787	819	813	813	804.8	17	13	13	13	22	15.6	0	0	2	2	0	0.8
241	824	834	812	801	873	828.8	2	3	2	4	2	2.6	0	0	0	0	0	0		241	793	789	820	817	817	807.2	17	13	13	13	21	15.4	0	0	2	2	0	0.8
242	825	837	814	805	878	831.8	2	3	2	4	2	2.6	0	0	0	0	0	0		242	796	794	824	820	820	810.8	17	13	13	13	21	15.4	0	0	2	2	0	0.8
243	827	840	817	807	883	834.8	2	3	2	4	2	2.6	0	0	0	0	0	0		243	798	797	826	822	822	813	17	13	13	13	21	15.4	0	0	2	2	0	0.8
244	828	841	828	816	896	841.8	2	3	2	4	2	2.6	0	0	0	0	0	0		244	802	798	830	825	825	816	17	13	13	13	21	15.4	0	0	2	2	0	0.8
245	832	847	833	824	900	847.2	2	3	2	4	2	2.6	0	0	0	0	0	0		245	809	800	836	826	826	819.4	17	13	13	13	21	15.4	0	0	2	2	0	0.8
246	835	850	835	825	905	850	2	3	2	3	2	2.4	0	0	0	0	0	0		246	810	802	839	829	829	821.8	17	13	13	13	21	15.4	0	0	2	2	0	0.8
247	837	854	835	826	907	851.8	2	3	2	3	2	2.4	0	0	0	0	0	0		247	812	804	842	830	830	823.6	17	13	13	13	21	15.4	0	0	2	2	0	0.8
248	838	856	837	828	909	853.6	2	3	2	3	2	2.4	0	0	0	0	0	0		248	813	808	843	831	831	825.2	17	13	13	13	21	15.4	0	0	2	2	0	0.8
249	839	859	838	830	912	855.6	2	3	2	3	2	2.4	0	0	0	0	0	0		249	815	810	847	832	832	827.2	16	13	13	13	21	15.2	0	0	2	2	0	0.8
250	843	863	840	833	915	858.8	2	3	2	3	2	2.4	0	0	0	0	0	0		250	820	820	858	837	837	834.4	19	13	13	13	20	15.6	0	0	2	2	0	0.8
251	847	868	842	841	922	864	2	3	2	3	2	2.4	0	0	0	0	0	0		251	822	823	861	837	837	836	21	13	16	16	20	17.2	0	0	2	2	0	0.8
252	852	871	845	848	926	868.4	2	3	2	3	2	2.4	0	0	0	0	0	0		252	822	823	865	840	840	838	21	12	16	16	20	17	0	0	2	2	0	0.8
253	869	889	847	855	930	878	2	3	2	3	2	2.4	0	0	0	0	0	0		253	823	824	864	845	845	840.2	21	12	16	16	19	16.8	0	0	2	2	0	0.8
254	877	894	854	861	937	884.6	2	3	2	3	2	2.4	0	0	0	0	0	0		254	823	827	869	848	848	843	20	14	16	16	19	17	0	0	2	2	0	0.8
255	887	903	857	865	940	890.4	2	3	2	3	2	2.4	0	0	0	0	0	0		255	835	832	876	853	853	849.8	20	14	16	16	19	17	0	0	2	2	0	0.8
256	888	907	858	868	945	893.2	2	3	2	3	2	2.4	0	0	0	0	0	0		256	839	835	878	854	854	852	20	14	16	16	19	17	0	0	2	2	0	0.8
257	895	912	860	871	949	897.4	2	3	2	3	2	2.4	0	0	0	0	0	0		257	842	841	890	858	858	857.8	20	14	16	16	19	17	0	0	2	2	0	0.8
258	908	928	864	877	954	906.2	2	3	2	3	2	2.4	0	0	0	0	0	0		258	854	853	904	866	866	868.6	20	14	16	16	19	17	0	0	2	2	0	0.8
259	912	929	866	884	962	910.6	2	3	2	3	2	2.4	0	0	0	0	0	0		259	856	855	904	866	866	869.4	19	14	16	16	19	16.8	0	0	2	2	0	0.8
260	929	948	872	889	967	921	2	3	2	3	2	2.4	0	0	0	0	0	0		260	858	857	910	870	870	873	19	14	18	18	19	17.6	0	0	2	2	0	0.8
261	930	949	874	892	975	924	2	3	2	3	5	3	0	0	0	0	0	0		261	864	860	910	874	874	876.4	22	14	18	18	19	18.2	0	0	2	2	0	0.8
262	937	953	878	897	977	928.4	2	3	5	3	5	3.6	0	0	0	0	0	0		262	867	861	913	879	879	879.8	22	14	18	18	19	18.2	0	0	2	2	0	0.8
263	938	954	877	900	981	930	2	3	5	3	5	3.6	0	0	0	0	0	0		263	868	863	918	883	883	883	22	14	18	18	19	18.2	0	0	2	2	0	0.8
264	939	956	879	904	983	932.2	2	3	5	3	5	3.6	0	0	0	0	0	0		264	870	866	920	886	886	885.6	22	20	18	18	21	19.8	0	0	2	2	0	0.8
265	943	960	882	911	987	936.6	2	3	5	6	5	4.2	0	0	0	0	0	0		265	879	872	923	889	889	890.4	22	20	17	17	21	19.4	0	0	2	2	0	0.8
266	944	960	884	914	990	938.4	2	3	5	6	5	4.2	0	0	0	0	0	0		266	882	880	928	897	897	896.8	22	23	17	17	21	20	0	0	2	2	0	0.8
267	947	964	888	918	994	942.2	2	3	5	6	5	4.2	0	0	0	0	0	0		267	887	883	930	896	896	898.4	22	23	17	17	21	20	0	0	2	2	0	0.8
268	950	967	889	922	998	945.2	2	3	5	6	5	4.2	0	0	0	0	0	0		268	889	888	936	901	901	903	22	23	23	23	21	22.4	0	0	2	2	0	0.8
269	950	966	895	928	1003	948.4	2	3	5	6	5	4.2	0	0	0	0	0	0		269	894	897	940	909	909	909.8	22	23	23	23	21	22.4	0	0	2	2	0	0.8
270	954	970	900	933	1003	952	2	3	5	6	4	4	0	0	0	0	0	0		270	899	899	942	912	912	912.8	22	23	23	23	21	22.4	0	0	2	2	0	0.8
271	962	976	908	943	1006	959	2	3	4	6	4	3.8	0	0	0	0	0	0		271	902	904	945	919	919	917.8	22	26	26	26	27	25.4	0	0	2	2	0	0.8
272	971	984	916	950	1007	965.6	2	3	4	6	4	3.8	0	0	0	0	0	0		272	909	911	951	925	925	924.2	22	26	24	24	27	24.6	0	0	2	2	0	0.8
273	972	984	920	953	1012	968.2	2	3	4	6	4	3.8	0	0	0	0	0	0		273	910	915	955	927	927	926.8	22	26	24	24	26	24.4	0	0	2	2	0	0.8
274	974	986	923	952	1017	970.4	2	3	4	5	7	4.2	0	0	0	0	0	0		274	912	920	958	933	933	931.2	22	26	24	24	26	24.4	0	0	2	2	0	0.8
275	976	988	928	958	1018	973.6	2	3	4	5	6	4	0	0	0	0	0	0		275	914	925	962	936	936	934.6	25	29	23	23	26	25.2	0	0	2	2	0	0.8
276	978	992	934	962	1022	977.6	2	3	3	5	6	3.8	0	0	0	0	0	0		276	915	931	966	941	941	938.8	25	29	23	23	26	25.2	0	0	2	2	0	0.8
277	981	997	938	965	1025	981.2	2	3	3	5	6	3.8	0	0	0	0	0	0		277	918	935	967	945	945	942	25	29	23	23	26	25.2	0	0	2	2	0	0.8
278	985	1002	943	967	1027	984.8	2	3	3	5	6	3.8	0	0	0	0	0	0		278	922	939	969	948	948	945.2	25	32	23	23	26	25.8	0	0	2	2	0	0.8
279	988	1004	947	969	1031	987.8	2	3	3	4	6	3.6	0	0	0	0	0	0		279	926	940	973	952	952	948.6	28	31	23	23	26	26.2	0	0	2	2	0	0.8
280	991	1006	952	973	1031	990.6	2	3	3	4	6	3.6	0	0	0	0	0	0		280	931	944	977	957	957	953.2	28	31	22	22	25	25.6	0	0	2	2	0	0.8
281	999	1015	959	977	1036	997.2	2	3	3	4	6	3.6	0	0	0	0	0	0		281	936	949	978	962	962	957.4	31	34	22	22	25	26.8	0	0	2	2	0	0.8
282	1005	1019	964	980	1040	1001.6	2	3	3	4	6	3.6	0	0	0	0	0	0		282	936	955	983	965	965	960.8	31	34	22	22	25	26.8	0	0	2	2	0	0.8
283	1007	1024	966	986	1042	1005	2	3	3	4	5	3.4	0	0	0	0	0	0		283	938	958	987	966	966	963	30	34	22	22	25	26.6	0	0	2	2	0	0.8
284	1015	1029	968	991	1047	1010	2	3	3	4	5	3.4	0	0	0	0	0	0		284	944	964	989	973	973	968.6	32	34	22	22	25	27	0	0	2	2	0	0.8
285	1021	1033	975	997	1056	1016.4	2	3	3	4	5	3.4	0	0	0	0	0	0		285	949	964	993	977	977	972	32	34	22	22	25	27	0	0	2	2	0	0.8
286	1022	1037	980	1006	1063	1021.6	2	3	3	4	5	3.4	0	0	0	0	0	0		286	952	965	994	982	982	975	32	34	22	22	25	27	0	0	2	2	0	0.8
287	1024	1039	983	1010	1067	1024.6	2	3	3	4	5	3.4	0	0	0	0	0	0		287	959	972	997	987	987	980.4	32	34	22	22	25	27	0	0	2	2	0	0.8
288	1027	1041	987	1012	1071	1027.6	2	3	3	4	4	3.2	0	0	0	0	0	0		288	961	973	1001	989	989	982.6	32	34	22	22	25	27	0	0	2	2	0	0.8
289	1033	1048	995	1017	1080	1034.6	2	3	3	4	4	3.2	0	0	0	0	0	0		289	966	981	1001	992	992	986.4	31	34	22	22	25	26.8	0	0	2	2	0	0.8
290	1039	1050	999	1019	1083	1038	2	3	3	4	4	3.2	0	0	0	0	0	0		290	969	990	1002	993	993	989.4	31	34	21	21	25	26.4	0	0	2	2	0	0.8
291	1043	1054	1001	1020	1089	1041.4	2	3	3	4	4	3.2	0	0	0	0	0	0		291	972	992	1004	996	996	992	31	34	21	21	25	26.4	0	0	2	2	0	0.8
292	1048	1059	1007	1024	1098	1047.2	2	3	3	4	4	3.2	0	0	0	0	0	0		292	977	1001	1008	998	998	996.4	34	34	21	21	27	27.4	0	0	2	2	0	0.8
293	1051	1062	1007	1025	1103	1049.6	2	3	3	4	4	3.2	0	0	0	0	0	0		293	977	1006	1016	1004	1004	1001.4	33	34	24	24	26	28.2	0	0	2	2	0	0.8
294	1054	1066	1010	1030	1103	1052.6	2	3	3	4	4	3.2	0	0	0	0	0	0		294	983	1010	1020	1013	1013	1007.8	32	34	27	27	26	29.2	0	0	2	2	0	0.8
295	1067	1079	1016	1036	1107	1061	2	3	3	4	4	3.2	0	0	0	0	0	0		295	989	1010	1027	1021	1021	1013.6	32	33	27	27	26	29	0	0	2	2	0	0.8
296	1068	1081	1021	1036	1109	1063	2	3	6	4	4	3.8	0	0	0	0	0	0		296	993	1015	1035	1033	1033	1021.8	31	33	27	27	26	28.8	0	0	2	2	0	0.8
297	1077	1090	1030	1038	1113	1069.6	2	3	6	4	4	3.8	0	0	0	0	0	0		297	1000	1022	1043	1034	1034	1026.6	31	33	27	27	26	28.8	0	0	2	2	0	0.8
298	1080	1094	1039	1042	1117	1074.4	2	6	6	4	4	4.4	0	0	0	0	0	0		298	1005	1026	1049	1040	1040	1032	31	33	27	27	29	29.4	0	0	2	2	0	0.8
299	1084	1098	1041	1043	1120	1077.2	2	6	6	4	4	4.4	0	0	0	0	0	0		299	1013	1030	1055	1049	1049	1039.2	31	34	27	27	29	29.6	0	0	2	2	0	0.8
300	1095	1108	1049	1049	1127	1085.6	2	6	6	4	4	4.4	0	0	0	0	0	0		300	1018	1033	1054	1055	1055	1043	33	33	26	26	28	29.2	0	0	2	2	0	0.8
301	1101	1115	1052	1050	1134	1090.4	2	6	6	4	4	4.4	0	0	0	0	0	0		301	1021	1038	1060	1056	1056	1046.2	33	33	26	26	28	29.2	0	0	2	2	0	0.8
302	1110	1123	1057	1053	1141	1096.8	2	6	6	4	4	4.4	0	0	0	0	0	0		302	1026	1039	1065	1061	1061	1050.4	33	33	26	26	28	29.2	0	0	2	2	0	0.8
303	1118	1129	1061	1059	1145	1102.4	2	6	6	4	4	4.4	0	0	0	0	0	0		303	1030	1046	1070	1066	1066	1055.6	33	36	25	25	28	29.4	0	0	2	2	0	0.8
304	1128	1139	1063	1063	1150	1108.6	2	6	6	4	4	4.4	0	0	0	0	0	0		304	1037	1050	1085	1078	1078	1065.6	33	34	25	25	28	29	0	0	2	2	0	0.8
305	1131	1144	1067	1065	1157	1112.8	2	6	5	4	4	4.2	0	0	0	0	0	0		305	1042	1058	1090	1084	1084	1071.6	36	32	25	25	28	29.2	0	0	2	2	0	0.8
306	1139	1153	1068	1065	1160	1117	2	6	5	4	4	4.2	0	0	0	0	0	0		306	1050	1067	1096	1092	1092	1079.4	39	31	25	25	28	29.6	0	0	2	2	0	0.8
307	1140	1154	1076	1067	1169	1121.2	2	5	5	4	4	4	0	0	0	0	0	0		307	1052	1074	1107	1097	1097	1085.4	39	31	31	31	28	32	0	0	2	2	0	0.8
308	1148	1163	1083	1074	1177	1129	2	5	8	4	4	4.6	0	0	0	0	0	0		308	1055	1088	1111	1101	1101	1091.2	38	31	32	32	28	32.2	0	0	2	2	0	0.8
309	1152	1165	1087	1079	1180	1132.6	2	5	8	4	4	4.6	0	0	0	0	0	0		309	1056	1091	1119	1108	1108	1096.4	38	31	32	32	31	32.8	0	0	2	2	0	0.8
310	1159	1171	1090	1082	1190	1138.4	2	5	7	4	4	4.4	0	0	0	0	0	0		310	1063	1097	1122	1111	1111	1100.8	38	31	32	32	31	32.8	0	0	2	2	0	0.8
311	1161	1174	1096	1088	1191	1142	2	5	7	4	4	4.4	0	0	0	0	0	0		311	1068	1104	1127	1114	1114	1105.4	38	31	34	34	31	33.6	0	0	2	2	0	0.8
312	1164	1175	1105	1096	1193	1146.6	2	4	7	4	4	4.2	0	0	0	0	0	0		312	1073	1105	1134	1118	1118	1109.6	38	31	37	37	34	35.4	0	0	2	2	0	0.8
313	1169	1179	1108	1099	1201	1151.2	2	4	7	4	7	4.8	0	0	0	0	0	0		313	1079	1108	1137	1121	1121	1113.2	38	31	36	36	34	35	0	0	2	2	0	0.8
314	1178	1185	1114	1107	1205	1157.8	2	4	7	4	7	4.8	0	0	0	0	0	0		314	1088	1110	1146	1129	1129	1120.4	38	30	36	36	34	34.8	0	0	2	2	0	0.8
315	1184	1191	1116	1108	1210	1161.8	2	4	7	4	7	4.8	0	0	0	0	0	0		315	1091	1116	1148	1133	1133	1124.2	38	30	35	35	34	34.4	0	0	2	2	0	0.8
316	1187	1192	1122	1111	1222	1166.8	2	4	7	4	7	4.8	0	0	0	0	0	0		316	1094	1119	1150	1135	1135	1126.6	38	29	34	34	34	33.8	0	0	2	2	0	0.8
317	1192	1197	1125	1116	1227	1171.4	2	4	6	4	7	4.6	0	0	0	0	0	0		317	1097	1121	1152	1141	1141	1130.4	38	29	34	34	36	34.2	0	0	2	2	0	0.8
318	1194	1200	1132	1120	1234	1176	2	4	6	4	7	4.6	0	0	0	0	0	0		318	1101	1128	1155	1144	1144	1134.4	38	29	33	33	36	33.8	0	0	2	2	0	0.8
319	1196	1201	1134	1123	1242	1179.2	2	4	9	7	7	5.8	0	0	0	0	0	0		319	1110	1133	1161	1152	1152	1141.6	38	27	33	33	35	33.2	0	0	2	2	0	0.8
320	1205	1208	1142	1127	1241	1184.6	5	4	9	10	7	7	0	0	0	0	0	0		320	1113	1138	1166	1154	1154	1145	37	27	32	32	35	32.6	0	0	2	2	0	0.8
321	1213	1217	1148	1137	1247	1192.4	5	4	9	10	7	7	0	0	0	0	0	0		321	1117	1143	1168	1159	1159	1149.2	37	27	32	32	37	33	0	0	2	2	0	0.8
322	1218	1223	1151	1143	1250	1197	5	4	8	10	6	6.6	0	0	0	0	0	0		322	1120	1145	1176	1167	1167	1155	36	28	32	32	40	33.6	0	2	2	2	0	1.2
323	1224	1227	1158	1147	1254	1202	5	4	8	10	6	6.6	0	0	0	0	0	0		323	1125	1152	1177	1173	1173	1160	36	28	32	32	40	33.6	0	2	2	2	0	1.2
324	1232	1232	1164	1150	1255	1206.6	5	4	8	10	6	6.6	0	0	0	0	0	0		324	1134	1155	1181	1180	1180	1166	36	28	31	31	40	33.2	0	2	2	2	0	1.2
325	1235	1234	1169	1158	1257	1210.6	5	4	8	10	6	6.6	0	0	0	0	0	0		325	1139	1167	1186	1183	1183	1171.6	38	28	34	34	40	34.8	0	2	2	2	0	1.2
326	1240	1240	1175	1164	1274	1218.6	5	4	8	10	6	6.6	0	0	0	0	0	0		326	1144	1172	1189	1184	1184	1174.6	38	31	34	34	39	35.2	0	2	2	2	0	1.2
327	1240	1241	1192	1169	1280	1224.4	5	4	8	10	5	6.4	0	0	0	0	0	0		327	1147	1174	1193	1186	1186	1177.2	38	31	33	33	39	34.8	0	2	2	2	0	1.2
328	1249	1248	1195	1173	1288	1230.6	4	4	7	9	5	5.8	0	0	0	0	0	0		328	1152	1177	1197	1186	1186	1179.6	38	31	33	33	37	34.4	0	2	2	2	0	1.2
329	1253	1251	1196	1180	1295	1235	3	4	7	8	5	5.4	0	0	0	0	0	0		329	1156	1184	1199	1190	1190	1183.8	41	31	31	31	37	34.2	0	2	2	2	0	1.2
330	1255	1256	1206	1190	1298	1241	3	4	7	8	5	5.4	0	0	0	0	0	0		330	1159	1193	1205	1205	1205	1193.4	41	31	31	31	37	34.2	0	2	2	2	0	1.2
331	1259	1260	1209	1196	1302	1245.2	3	4	7	11	5	6	0	0	0	0	0	0		331	1168	1195	1209	1208	1208	1197.6	43	31	31	31	40	35.2	0	2	2	2	0	1.2
332	1262	1262	1213	1205	1308	1250	3	4	7	11	5	6	0	0	0	0	0	0		332	1177	1200	1213	1208	1208	1201.2	45	35	31	31	40	36.4	0	4	2	2	0	1.6
333	1266	1267	1214	1208	1310	1253	3	4	6	10	5	5.6	0	0	0	0	0	0		333	1179	1205	1217	1211	1211	1204.6	45	35	31	31	40	36.4	0	4	2	2	0	1.6
334	1277	1277	1220	1209	1317	1260	2	4	6	9	5	5.2	0	0	0	0	0	0		334	1182	1211	1223	1216	1216	1209.6	46	35	30	30	40	36.2	0	4	2	2	0	1.6
335	1289	1288	1224	1218	1319	1267.6	2	4	6	12	5	5.8	0	0	0	0	0	0		335	1191	1217	1233	1219	1219	1215.8	46	35	33	33	40	37.4	0	4	2	2	0	1.6
336	1294	1293	1225	1226	1322	1272	2	4	6	12	5	5.8	0	0	0	0	0	0		336	1194	1225	1238	1223	1223	1220.6	45	35	33	33	40	37.2	0	4	2	2	0	1.6
337	1297	1294	1232	1230	1332	1277	2	4	9	12	5	6.4	0	0	0	0	0	0		337	1199	1232	1245	1229	1229	1226.8	45	35	33	33	40	37.2	0	4	2	2	0	1.6
338	1302	1298	1236	1238	1342	1283.2	2	4	9	12	5	6.4	0	0	0	0	0	0		338	1201	1236	1251	1236	1236	1232	44	35	33	33	42	37.4	0	4	2	2	0	1.6
339	1305	1300	1240	1239	1343	1285.4	2	4	9	12	5	6.4	0	0	0	0	0	0		339	1204	1239	1254	1240	1240	1235.4	44	37	32	32	42	37.4	0	4	2	2	0	1.6
340	1315	1311	1246	1244	1346	1292.4	2	4	9	11	5	6.2	0	0	0	0	0	0		340	1205	1244	1262	1256	1256	1244.6	44	37	34	34	47	39.2	0	4	2	2	0	1.6
341	1322	1319	1250	1247	1350	1297.6	2	4	9	11	5	6.2	0	0	0	0	0	0		341	1212	1254	1270	1266	1266	1253.6	44	36	34	34	50	39.6	0	4	2	2	0	1.6
342	1328	1322	1261	1256	1354	1304.2	2	4	9	14	5	6.8	0	0	0	0	0	0		342	1216	1253	1272	1268	1268	1255.4	45	37	34	34	49	39.8	2	4	2	2	0	2
343	1333	1327	1265	1262	1362	1309.8	2	4	9	14	5	6.8	0	0	0	0	0	0		343	1221	1260	1277	1270	1270	1259.6	45	37	34	34	49	39.8	2	4	2	2	0	2
344	1341	1335	1270	1265	1372	1316.6	2	4	9	13	5	6.6	0	0	0	0	0	0		344	1229	1263	1282	1276	1276	1265.2	45	37	34	34	49	39.8	2	4	2	2	0	2
345	1344	1338	1273	1266	1375	1319.2	2	4	9	12	5	6.4	0	0	0	0	0	0		345	1235	1265	1283	1280	1280	1268.6	45	37	33	33	49	39.4	2	4	2	2	0	2
346	1354	1346	1272	1268	1381	1324.2	2	4	8	12	5	6.2	0	0	0	0	0	0		346	1237	1269	1284	1283	1283	1271.2	44	37	33	33	49	39.2	2	4	2	2	0	2
347	1360	1350	1279	1271	1385	1329	2	4	8	12	5	6.2	0	0	0	0	0	0		347	1241	1274	1288	1287	1287	1275.4	44	42	36	36	48	41.2	2	4	2	2	0	2
348	1364	1353	1284	1276	1385	1332.4	2	4	8	12	5	6.2	0	0	0	0	0	0		348	1247	1279	1293	1294	1294	1281.4	44	42	36	36	48	41.2	2	4	2	2	0	2
349	1371	1358	1289	1277	1394	1337.8	2	4	8	11	4	5.8	0	0	0	0	0	0		349	1252	1285	1295	1297	1297	1285.2	47	42	36	36	47	41.6	2	4	2	2	0	2
350	1375	1362	1296	1281	1405	1343.8	2	4	8	11	7	6.4	0	0	0	0	0	0		350	1259	1286	1303	1310	1310	1293.6	47	42	39	39	47	42.8	2	4	2	2	0	2
351	1378	1366	1301	1280	1408	1346.6	2	4	7	10	7	6	0	0	0	0	0	0		351	1269	1289	1312	1315	1315	1300	46	42	42	42	47	43.8	2	4	2	2	0	2
352	1383	1371	1302	1287	1413	1351.2	2	4	7	10	7	6	0	0	0	0	0	0		352	1273	1294	1313	1321	1321	1304.4	45	42	41	41	47	43.2	2	4	2	2	0	2
353	1392	1376	1306	1291	1420	1357	2	4	7	10	7	6	0	0	0	0	0	0		353	1277	1297	1314	1325	1325	1307.6	45	42	41	41	46	43	2	4	2	2	0	2
354	1397	1381	1313	1302	1432	1365	2	4	7	10	7	6	0	0	0	0	0	0		354	1282	1301	1317	1330	1330	1312	45	42	41	41	45	42.8	2	4	2	2	0	2
355	1399	1386	1321	1306	1435	1369.4	2	4	7	10	7	6	0	0	0	0	0	0		355	1282	1305	1321	1334	1334	1315.2	45	41	41	41	44	42.4	2	4	2	2	0	2
356	1403	1392	1326	1308	1440	1373.8	2	4	7	9	7	5.8	0	0	0	0	0	0		356	1285	1310	1324	1342	1342	1320.6	45	41	41	41	44	42.4	2	4	2	2	0	2
357	1405	1393	1331	1310	1443	1376.4	2	4	7	9	7	5.8	0	0	0	0	0	0		357	1287	1313	1330	1347	1347	1324.8	45	41	38	38	43	41	2	4	2	2	0	2
358	1412	1400	1340	1312	1448	1382.4	2	4	7	9	7	5.8	0	0	0	0	0	0		358	1290	1320	1335	1347	1347	1327.8	45	41	38	38	43	41	2	4	2	2	0	2
359	1420	1406	1348	1318	1451	1388.6	2	4	7	9	6	5.6	0	0	0	0	0	0		359	1293	1322	1340	1350	1350	1331	45	40	38	38	43	40.8	2	4	2	2	0	2
360	1425	1412	1356	1328	1457	1395.6	2	4	7	9	6	5.6	0	0	0	0	0	0		360	1297	1323	1348	1352	1352	1334.4	46	39	37	37	42	40.2	2	4	2	2	0	2
361	1426	1415	1360	1334	1464	1399.8	2	4	7	9	6	5.6	0	0	0	0	0	0		361	1304	1328	1354	1354	1354	1338.8	48	42	37	37	42	41.2	2	4	2	2	0	2
362	1432	1424	1366	1339	1473	1406.8	5	7	7	9	6	6.8	0	0	0	0	0	0		362	1317	1334	1356	1357	1357	1344.2	48	41	37	37	41	40.8	2	3	2	2	0	1.8
363	1435	1427	1373	1345	1479	1411.8	5	7	7	9	6	6.8	0	0	0	0	0	0		363	1321	1339	1357	1359	1359	1347	50	41	37	37	40	41	2	3	2	2	0	1.8
364	1443	1433	1375	1356	1486	1418.6	5	7	7	9	5	6.6	0	0	0	0	0	0		364	1335	1347	1365	1367	1367	1356.2	49	41	37	37	40	40.8	2	3	2	2	0	1.8
365	1444	1436	1380	1364	1492	1423.2	5	7	7	9	5	6.6	0	0	0	0	0	0		365	1336	1346	1369	1370	1370	1358.2	48	40	39	39	40	41.2	2	3	4	4	0	2.6
366	1450	1444	1382	1374	1495	1429	5	7	7	12	5	7.2	0	0	0	0	0	0		366	1347	1352	1377	1376	1376	1365.6	46	40	38	38	40	40.4	2	3	4	4	0	2.6
367	1462	1450	1389	1376	1506	1436.6	5	6	7	12	5	7	0	0	0	0	0	0		367	1358	1357	1380	1379	1379	1370.6	48	40	37	37	40	40.4	2	3	4	4	0	2.6
368	1466	1454	1396	1386	1506	1441.6	5	6	7	12	5	7	0	0	0	0	0	0		368	1368	1365	1387	1386	1386	1378.4	51	40	37	37	39	40.8	2	3	4	4	0	2.6
369	1478	1464	1401	1392	1518	1450.6	5	6	7	12	5	7	0	0	0	0	0	0		369	1373	1368	1387	1384	1384	1379.2	51	40	36	36	38	40.2	2	3	4	4	0	2.6
370	1489	1475	1410	1401	1524	1459.8	5	6	7	12	5	7	0	0	0	0	0	0		370	1382	1370	1393	1388	1388	1384.2	51	40	41	41	37	42	2	3	4	4	0	2.6
371	1494	1479	1424	1407	1529	1466.6	4	5	7	12	5	6.6	0	0	0	0	0	0		371	1387	1370	1394	1399	1399	1389.8	53	40	41	41	40	43	2	3	4	4	0	2.6
372	1501	1489	1430	1410	1534	1472.8	4	5	7	12	5	6.6	0	0	0	0	0	0		372	1395	1378	1395	1406	1406	1396	56	42	39	39	40	43.2	2	3	4	4	0	2.6
373	1507	1494	1436	1418	1541	1479.2	4	5	7	12	5	6.6	0	0	0	0	0	0		373	1400	1381	1393	1409	1409	1398.4	56	42	39	39	43	43.8	2	3	4	4	0	2.6
374	1516	1503	1440	1421	1546	1485.2	4	5	7	12	5	6.6	0	0	0	0	0	0		374	1405	1384	1395	1420	1420	1404.8	56	42	38	38	42	43.2	2	3	3	3	0	2.2
375	1522	1508	1444	1425	1551	1490	4	5	7	11	5	6.4	0	0	0	0	0	0		375	1407	1386	1400	1424	1424	1408.2	56	41	38	38	42	43	2	3	3	3	0	2.2
376	1524	1513	1453	1437	1563	1498	3	4	7	11	5	6	0	0	0	0	0	0		376	1410	1390	1400	1434	1434	1413.6	55	41	38	38	42	42.8	2	3	3	3	0	2.2
377	1529	1520	1460	1442	1568	1503.8	3	4	7	11	5	6	0	0	0	0	0	0		377	1418	1393	1404	1438	1438	1418.2	55	40	38	38	42	42.6	2	3	3	3	0	2.2
378	1537	1526	1461	1453	1574	1510.2	3	4	7	11	5	6	0	0	0	0	0	0		378	1425	1398	1417	1441	1441	1424.4	55	40	41	41	42	43.8	2	3	3	3	0	2.2
379	1543	1533	1468	1458	1583	1517	3	4	7	11	5	6	0	0	0	0	0	0		379	1427	1405	1426	1448	1448	1430.8	55	43	43	43	42	45.2	2	3	3	3	0	2.2
380	1548	1538	1479	1464	1592	1524.2	3	4	7	10	5	5.8	0	0	0	0	0	0		380	1434	1412	1435	1459	1459	1439.8	55	42	42	42	47	45.6	2	3	3	3	0	2.2
381	1559	1548	1488	1468	1595	1531.6	3	4	7	10	5	5.8	0	0	0	0	0	0		381	1437	1413	1439	1466	1466	1444.2	58	42	42	42	47	46.2	2	3	3	3	0	2.2
382	1567	1555	1496	1476	1600	1538.8	3	4	7	10	5	5.8	0	0	0	0	0	0		382	1444	1424	1444	1472	1472	1451.2	58	42	47	47	47	48.2	2	3	3	3	0	2.2
383	1571	1561	1503	1479	1603	1543.4	3	4	7	10	5	5.8	0	0	0	0	0	0		383	1446	1424	1451	1480	1480	1456.2	56	41	47	47	47	47.6	2	3	3	3	0	2.2
384	1580	1567	1513	1486	1608	1550.8	3	4	7	10	5	5.8	0	0	0	0	0	0		384	1451	1426	1458	1485	1485	1461	56	41	47	47	47	47.6	2	3	3	3	0	2.2
385	1584	1574	1516	1492	1614	1556	3	4	7	10	5	5.8	0	0	0	0	0	0		385	1455	1429	1461	1489	1489	1464.6	56	41	47	47	47	47.6	2	3	3	3	0	2.2
386	1591	1580	1525	1498	1619	1562.6	3	4	7	10	5	5.8	0	0	0	0	0	0		386	1459	1433	1469	1493	1493	1469.4	56	41	46	46	47	47.2	2	3	2	2	0	1.8
387	1597	1586	1530	1501	1621	1567	3	4	9	10	5	6.2	0	0	0	0	0	0		387	1468	1438	1472	1501	1501	1476	59	41	46	46	47	47.8	2	3	2	2	0	1.8
388	1607	1598	1536	1506	1627	1574.8	3	4	9	10	5	6.2	0	0	0	0	0	0		388	1476	1446	1476	1505	1505	1481.6	58	40	46	46	47	47.4	2	3	2	2	0	1.8
389	1610	1602	1543	1512	1630	1579.4	3	4	9	10	5	6.2	0	0	0	0	0	0		389	1485	1449	1484	1508	1508	1486.8	58	40	46	46	47	47.4	2	3	2	2	0	1.8
390	1614	1606	1557	1516	1636	1585.8	3	4	12	10	5	6.8	0	0	0	0	0	0		390	1488	1455	1492	1511	1511	1491.4	57	39	47	47	47	47.4	2	3	2	2	0	1.8
391	1620	1609	1562	1519	1644	1590.8	3	4	12	10	8	7.4	0	0	0	0	0	0		391	1492	1458	1502	1513	1513	1495.6	60	39	45	45	47	47.2	2	3	1	1	0	1.4
392	1630	1619	1571	1525	1650	1599	3	4	12	10	8	7.4	0	0	0	0	0	0		392	1498	1461	1510	1521	1521	1502.2	60	39	47	47	47	48	2	3	1	1	0	1.4
393	1633	1625	1573	1528	1660	1603.8	3	4	12	10	8	7.4	0	0	0	0	0	0		393	1511	1470	1513	1530	1530	1510.8	58	38	47	47	47	47.4	2	3	1	1	0	1.4
394	1641	1637	1579	1534	1670	1612.2	3	4	12	10	8	7.4	0	0	0	0	0	0		394	1521	1479	1525	1536	1536	1519.4	57	38	45	45	50	47	1	3	1	1	0	1.2
395	1647	1644	1586	1541	1676	1618.8	3	4	12	13	8	8	0	0	0	0	0	0		395	1527	1483	1528	1541	1541	1524	56	38	45	45	49	46.6	1	3	1	1	0	1.2
396	1653	1655	1595	1546	1679	1625.6	3	4	11	13	8	7.8	0	0	0	0	0	0		396	1530	1490	1534	1544	1544	1528.4	54	37	45	45	48	45.8	1	3	1	1	0	1.2
397	1659	1661	1601	1554	1686	1632.2	3	4	11	13	8	7.8	0	0	0	0	0	0		397	1531	1491	1536	1551	1551	1532	52	36	43	43	48	44.4	1	3	1	1	0	1.2
398	1662	1665	1606	1560	1695	1637.6	3	4	11	13	8	7.8	0	0	0	0	0	0		398	1536	1498	1539	1556	1556	1537	52	36	43	43	48	44.4	1	3	1	1	0	1.2
399	1668	1672	1608	1564	1704	1643.2	3	4	10	13	8	7.6	0	0	0	0	0	0		399	1543	1501	1544	1557	1557	1540.4	55	36	46	46	48	46.2	1	3	1	1	0	1.2
400	1674	1680	1613	1567	1712	1649.2	3	4	10	13	7	7.4	0	0	0	0	0	0		400	1545	1502	1552	1563	1563	1545	54	36	46	46	49	46.2	1	3	1	1	0	1.2
401	1677	1686	1620	1572	1720	1655	3	4	9	13	7	7.2	0	0	0	0	0	0		401	1554	1507	1562	1567	1567	1551.4	54	36	49	49	48	47.2	1	3	1	1	0	1.2
402	1685	1694	1625	1577	1727	1661.6	3	4	9	13	7	7.2	0	0	0	0	0	0		402	1558	1509	1564	1573	1573	1555.4	53	35	48	48	48	46.4	1	3	1	1	0	1.2
403	1690	1697	1633	1584	1731	1667	3	4	9	16	7	7.8	0	0	0	0	0	0		403	1562	1511	1567	1584	1584	1561.6	56	35	47	47	48	46.6	1	3	1	1	0	1.2
404	1696	1706	1635	1587	1734	1671.6	3	4	8	15	7	7.4	0	0	0	0	0	0		404	1566	1516	1572	1589	1589	1566.4	55	35	47	47	48	46.4	1	3	1	1	0	1.2
405	1709	1714	1642	1595	1733	1678.6	3	4	8	15	6	7.2	0	0	0	0	0	0		405	1568	1517	1578	1598	1598	1571.8	58	35	47	47	47	46.8	1	3	1	1	0	1.2
406	1715	1719	1647	1601	1738	1684	3	4	8	15	6	7.2	0	0	0	0	0	0		406	1568	1524	1584	1598	1598	1574.4	58	35	46	46	47	46.4	1	3	1	1	0	1.2
407	1724	1725	1651	1610	1745	1691	3	4	8	15	6	7.2	0	0	0	0	0	0		407	1570	1531	1588	1610	1610	1581.8	58	38	46	46	47	47	1	3	1	1	0	1.2
408	1726	1730	1657	1615	1754	1696.4	3	4	8	15	9	7.8	0	0	0	0	0	0		408	1575	1534	1598	1613	1613	1586.6	58	38	52	52	47	49.4	1	3	1	1	0	1.2
409	1734	1737	1664	1622	1756	1702.6	6	7	8	14	9	8.8	0	0	0	0	0	0		409	1576	1534	1605	1618	1618	1590.2	55	38	52	52	47	48.8	1	3	1	1	0	1.2
410	1743	1745	1669	1626	1760	1708.6	6	7	8	14	9	8.8	0	0	0	0	0	0		410	1580	1539	1606	1620	1620	1593	55	38	52	52	45	48.4	1	3	1	1	0	1.2
411	1747	1746	1674	1633	1768	1713.6	6	7	8	14	9	8.8	0	0	0	0	0	0		411	1582	1544	1610	1627	1627	1598	55	38	51	51	45	48	1	3	1	1	0	1.2
412	1752	1753	1676	1644	1773	1719.6	6	7	8	13	9	8.6	0	0	0	0	0	0		412	1590	1547	1615	1630	1630	1602.4	55	38	51	51	44	47.8	1	3	1	1	0	1.2
413	1756	1760	1685	1654	1779	1726.8	6	7	8	13	9	8.6	0	0	0	0	0	0		413	1592	1554	1619	1636	1636	1607.4	54	38	50	50	44	47.2	1	3	1	1	0	1.2
414	1759	1766	1693	1659	1784	1732.2	6	10	8	13	9	9.2	0	0	0	0	0	0		414	1594	1558	1628	1641	1641	1612.4	51	38	52	52	44	47.4	1	3	1	1	0	1.2
415	1765	1773	1700	1674	1793	1741	6	10	8	13	9	9.2	0	0	0	0	0	0		415	1597	1569	1639	1646	1646	1619.4	51	41	55	55	44	49.2	1	3	1	1	0	1.2
416	1769	1780	1708	1679	1801	1747.4	6	10	8	13	9	9.2	0	0	0	0	0	0		416	1598	1574	1643	1648	1648	1622.2	49	41	55	55	44	48.8	1	3	1	1	0	1.2
417	1777	1790	1720	1687	1806	1756	6	10	8	12	8	8.8	0	0	0	0	0	0		417	1601	1578	1648	1653	1653	1626.6	49	41	55	55	44	48.8	1	3	1	1	0	1.2
418	1779	1795	1725	1694	1816	1761.8	5	9	8	12	8	8.4	0	0	0	0	0	0		418	1606	1582	1657	1656	1656	1631.4	48	41	55	55	44	48.6	1	3	1	1	0	1.2
419	1788	1805	1728	1701	1821	1768.6	5	9	8	15	8	9	0	0	0	0	0	0		419	1610	1589	1665	1661	1661	1637.2	48	41	55	55	44	48.6	3	3	1	1	0	1.6
420	1792	1812	1734	1710	1827	1775	5	9	8	15	8	9	0	0	0	0	0	0		420	1618	1593	1667	1667	1667	1642.4	48	41	54	54	43	48	3	3	1	1	0	1.6
421	1801	1831	1741	1714	1837	1784.8	5	9	8	15	8	9	0	0	0	0	0	0		421	1622	1597	1673	1679	1679	1650	47	41	54	54	43	47.8	3	3	1	1	0	1.6
422	1808	1841	1747	1720	1838	1790.8	5	9	8	15	7	8.8	0	0	0	0	0	0		422	1628	1603	1679	1682	1682	1654.8	47	41	54	54	43	47.8	3	3	1	1	0	1.6
423	1815	1845	1752	1730	1842	1796.8	7	7	8	15	7	8.8	0	0	0	0	0	0		423	1632	1610	1684	1685	1685	1659.2	47	41	54	54	42	47.6	3	3	1	1	0	1.6
424	1821	1851	1757	1736	1850	1803	7	10	8	15	7	9.4	0	0	0	0	0	0		424	1630	1616	1689	1688	1688	1662.2	47	41	57	57	42	48.8	3	3	1	1	0	1.6
425	1828	1857	1764	1743	1856	1809.6	7	10	8	15	7	9.4	0	0	0	0	0	0		425	1635	1615	1695	1698	1698	1668.2	47	41	59	59	42	49.6	3	3	1	1	0	1.6
426	1833	1860	1769	1747	1863	1814.4	7	10	8	15	7	9.4	0	0	0	0	0	0		426	1638	1619	1700	1702	1702	1672.2	46	41	61	61	45	50.8	3	3	1	1	0	1.6
427	1838	1865	1776	1756	1872	1821.4	7	10	8	15	7	9.4	0	0	0	0	0	0		427	1642	1633	1706	1704	1704	1677.8	46	41	64	64	44	51.8	3	3	1	1	0	1.6
428	1842	1873	1783	1765	1879	1828.4	7	9	8	17	7	9.6	0	0	0	0	0	0		428	1646	1639	1708	1710	1710	1682.6	45	41	64	64	46	52	3	3	1	1	0	1.6
429	1849	1880	1787	1774	1885	1835	7	9	8	17	7	9.6	0	0	0	0	0	0		429	1648	1644	1713	1713	1713	1686.2	45	41	63	63	46	51.6	3	3	1	1	0	1.6
430	1858	1888	1792	1784	1887	1841.8	7	9	8	17	7	9.6	0	0	0	0	0	0		430	1651	1653	1722	1715	1715	1691.2	45	41	66	66	50	53.6	3	3	1	1	0	1.6
431	1872	1896	1801	1795	1891	1851	7	9	8	17	7	9.6	0	0	0	0	0	0		431	1651	1663	1734	1722	1722	1698.4	45	47	65	65	50	54.4	3	3	1	1	0	1.6
432	1883	1906	1811	1805	1900	1861	9	12	8	17	7	10.6	0	0	0	0	0	0		432	1658	1667	1739	1731	1731	1705.2	45	47	65	65	50	54.4	3	3	1	1	0	1.6
433	1886	1909	1817	1814	1911	1867.4	9	11	8	16	7	10.2	0	0	0	0	0	0		433	1662	1674	1742	1735	1735	1709.6	45	47	64	64	53	54.6	3	3	1	1	0	1.6
434	1891	1913	1827	1822	1920	1874.6	9	11	8	16	7	10.2	0	0	0	0	0	0		434	1667	1675	1750	1745	1745	1716.4	45	46	64	64	53	54.4	3	3	1	1	0	1.6
435	1898	1920	1835	1829	1931	1882.6	9	14	8	16	7	10.8	0	0	0	0	0	0		435	1669	1681	1756	1750	1750	1721.2	43	45	64	64	53	53.8	3	3	1	1	0	1.6
436	1909	1931	1840	1837	1939	1891.2	9	14	8	16	7	10.8	0	0	0	0	0	0		436	1673	1689	1764	1753	1753	1726.4	43	45	64	64	53	53.8	3	3	1	1	0	1.6
437	1910	1935	1845	1843	1947	1896	8	14	8	15	7	10.4	0	0	0	0	0	0		437	1677	1692	1766	1757	1757	1729.8	43	45	64	64	53	53.8	3	3	1	1	0	1.6
438	1916	1940	1854	1849	1952	1902.2	8	13	8	15	7	10.2	0	0	0	0	0	0		438	1681	1699	1771	1754	1754	1731.8	43	45	64	64	52	53.6	3	3	1	1	0	1.6
439	1928	1955	1862	1858	1959	1912.4	8	13	8	15	7	10.2	0	0	0	0	0	0		439	1691	1705	1777	1759	1759	1738.2	43	45	63	63	52	53.2	3	3	1	1	0	1.6
440	1932	1963	1868	1865	1966	1918.8	8	13	8	15	7	10.2	0	0	0	0	0	0		440	1696	1708	1782	1763	1763	1742.4	42	44	62	62	51	52.2	3	3	1	1	0	1.6
441	1939	1971	1872	1867	1978	1925.4	7	12	8	15	10	10.4	0	0	0	0	0	0		441	1702	1714	1788	1771	1771	1749.2	42	43	64	64	51	52.8	3	3	1	1	0	1.6
442	1943	1972	1875	1872	1983	1929	7	12	8	14	9	10	0	0	0	0	0	0		442	1709	1719	1791	1773	1773	1753	42	43	64	64	51	52.8	3	3	1	1	0	1.6
443	1946	1976	1880	1877	1988	1933.4	7	12	8	14	9	10	0	0	0	0	0	0		443	1717	1733	1796	1779	1779	1760.8	42	43	63	63	50	52.2	3	3	1	1	0	1.6
444	1956	1988	1894	1887	1999	1944.8	7	11	8	14	9	9.8	0	0	0	0	0	0		444	1721	1745	1801	1789	1789	1769	41	43	62	62	50	51.6	3	3	1	1	0	1.6
445	1967	1993	1902	1897	2010	1953.8	7	11	8	14	12	10.4	0	0	0	0	0	0		445	1727	1753	1808	1795	1795	1775.6	43	43	62	62	49	51.8	3	3	1	1	0	1.6
446	1974	2000	1910	1903	2017	1960.8	6	10	8	14	12	10	0	0	0	0	0	0		446	1733	1761	1812	1803	1803	1782.4	43	42	62	62	49	51.6	3	3	1	1	0	1.6
447	1981	2010	1920	1912	2023	1969.2	6	10	8	14	12	10	0	0	0	0	0	0		447	1737	1767	1823	1809	1809	1789	43	41	65	65	49	52.6	3	3	1	1	0	1.6
448	1986	2021	1927	1918	2035	1977.4	6	10	8	14	12	10	0	0	0	0	0	0		448	1746	1772	1836	1813	1813	1796	43	39	65	65	49	52.2	3	3	1	1	0	1.6
449	1996	2029	1934	1924	2044	1985.4	6	9	11	14	12	10.4	0	0	0	0	0	0		449	1751	1780	1837	1820	1820	1801.6	45	42	64	64	50	53	3	3	1	1	0	1.6
450	2006	2036	1937	1931	2052	1992.4	6	9	11	14	11	10.2	0	0	0	0	0	0		450	1753	1783	1848	1826	1826	1807.2	45	42	67	67	52	54.6	3	5	1	1	0	2
451	2012	2042	1948	1943	2059	2000.8	6	9	14	14	11	10.8	0	0	0	0	0	0		451	1765	1790	1854	1828	1828	1813	45	42	69	69	52	55.4	3	5	1	1	0	2
452	2020	2050	1959	1946	2066	2008.2	6	9	14	13	11	10.6	0	0	0	0	0	0		452	1777	1791	1857	1845	1845	1823	44	42	69	69	52	55.2	3	5	1	1	0	2
453	2031	2059	1965	1957	2077	2017.8	6	9	14	13	11	10.6	0	0	0	0	0	0		453	1791	1794	1859	1852	1852	1829.6	44	41	69	69	52	55	3	5	1	1	0	2
454	2035	2068	1972	1965	2088	2025.6	6	9	14	13	13	11	0	0	0	0	0	0		454	1799	1805	1866	1856	1856	1836.4	44	44	68	68	52	55.2	3	5	1	1	0	2
455	2041	2076	1982	1975	2099	2034.6	6	9	14	13	12	10.8	0	0	0	0	0	0		455	1809	1812	1870	1857	1857	1841	47	44	68	68	52	55.8	3	5	1	1	0	2
456	2044	2083	1990	1983	2108	2041.6	6	9	14	13	12	10.8	0	0	0	0	0	0		456	1814	1822	1878	1865	1865	1848.8	47	43	68	68	52	55.6	3	5	1	1	0	2
457	2049	2086	1995	1992	2115	2047.4	6	8	14	13	12	10.6	0	0	0	0	0	0		457	1821	1832	1885	1873	1873	1856.8	47	43	68	68	52	55.6	3	5	1	1	0	2
458	2055	2092	2005	1999	2120	2054.2	5	7	13	19	12	11.2	0	0	0	0	0	0		458	1827	1840	1889	1876	1876	1861.6	47	43	68	68	52	55.6	3	5	1	1	0	2
459	2064	2096	2015	2007	2125	2061.4	5	7	13	19	11	11	0	0	0	0	0	0		459	1831	1845	1890	1885	1885	1867.2	47	41	68	68	52	55.2	3	5	1	1	0	2
460	2073	2102	2021	2018	2132	2069.2	8	7	12	19	11	11.4	0	0	0	0	0	0		460	1837	1855	1894	1892	1892	1874	50	44	66	66	55	56.2	3	5	1	1	0	2
461	2083	2110	2032	2025	2138	2077.6	8	7	12	19	11	11.4	0	0	0	0	0	0		461	1842	1856	1905	1897	1897	1879.4	50	44	66	66	55	56.2	3	5	1	1	0	2
462	2096	2122	2038	2033	2149	2087.6	8	7	12	19	11	11.4	0	0	0	0	0	0		462	1849	1863	1910	1908	1908	1887.6	50	44	66	66	55	56.2	3	5	1	1	0	2
463	2099	2125	2047	2040	2158	2093.8	8	7	11	22	10	11.6	0	0	0	0	0	0		463	1853	1875	1921	1913	1913	1895	50	44	69	69	53	57	3	5	1	1	0	2
464	2104	2135	2054	2045	2167	2101	8	10	11	22	10	12.2	0	0	0	0	0	0		464	1861	1881	1925	1921	1921	1901.8	51	43	69	69	53	57	3	5	1	1	0	2
465	2116	2144	2063	2057	2179	2111.8	8	10	10	25	10	12.6	0	0	0	0	0	0		465	1869	1890	1929	1926	1926	1908	51	43	68	68	53	56.6	3	5	1	1	0	2
466	2128	2155	2069	2058	2192	2120.4	8	10	10	25	10	12.6	0	0	0	0	0	0		466	1880	1895	1936	1938	1938	1917.4	51	46	68	68	53	57.2	3	5	1	1	0	2
467	2142	2167	2073	2067	2198	2129.4	8	10	10	23	10	12.2	0	0	0	0	0	0		467	1887	1901	1945	1946	1946	1925	51	49	68	68	53	57.8	3	5	1	1	0	2
468	2151	2174	2082	2072	2203	2136.4	8	10	10	23	9	12	0	0	0	0	0	0		468	1894	1911	1955	1947	1947	1930.8	51	49	68	68	50	57.2	3	5	1	1	0	2
469	2165	2185	2086	2080	2213	2145.8	7	10	10	23	9	11.8	0	0	0	0	0	0		469	1903	1918	1962	1949	1949	1936.2	51	49	68	68	50	57.2	3	5	1	1	0	2
470	2172	2191	2094	2089	2220	2153.2	7	10	10	23	9	11.8	0	0	0	0	0	0		470	1906	1923	1969	1949	1949	1939.2	51	49	68	68	49	57	3	5	1	1	0	2
471	2176	2195	2105	2103	2225	2160.8	7	10	10	23	9	11.8	0	0	0	0	0	0		471	1915	1930	1975	1954	1954	1945.6	51	51	68	68	52	58	3	5	1	1	0	2
472	2180	2203	2116	2108	2234	2168.2	7	10	10	20	9	11.2	0	0	0	0	0	0		472	1922	1933	1988	1964	1964	1954.2	51	51	71	71	55	59.8	3	5	1	1	0	2
473	2195	2215	2121	2114	2242	2177.4	7	9	10	20	8	10.8	0	0	0	0	0	0		473	1931	1944	1990	1969	1969	1960.6	51	52	74	74	54	61	3	5	1	1	0	2
474	2200	2219	2134	2124	2250	2185.4	9	9	10	19	8	11	0	0	0	0	0	0		474	1937	1954	2001	1976	1976	1968.8	51	52	73	73	54	60.6	3	5	1	1	0	2
475	2205	2227	2144	2129	2259	2192.8	9	9	13	19	8	11.6	0	0	0	0	0	0		475	1941	1963	2011	1982	1982	1975.8	50	52	73	73	54	60.4	3	5	1	1	0	2
476	2214	2237	2150	2141	2269	2202.2	9	9	13	19	8	11.6	0	0	0	0	0	0		476	1945	1976	2014	1987	1987	1981.8	49	52	73	73	54	60.2	3	5	1	1	0	2
477	2217	2242	2155	2146	2282	2208.4	9	9	13	18	8	11.4	0	0	0	0	0	0		477	1955	1983	2020	1996	1996	1990	48	52	74	74	53	60.2	3	5	1	1	0	2
478	2229	2254	2163	2159	2290	2219	9	8	13	18	8	11.2	0	0	0	0	0	0		478	1964	1990	2022	2004	2004	1996.8	48	55	74	74	52	60.6	3	5	1	1	0	2
479	2235	2261	2172	2163	2298	2225.8	9	8	13	16	11	11.4	0	0	0	0	0	0		479	1974	1999	2028	2009	2009	2003.8	48	55	75	75	54	61.4	3	5	1	1	0	2
480	2244	2272	2180	2173	2312	2236.2	9	8	13	16	11	11.4	0	0	0	0	0	0		480	1980	2006	2032	2014	2014	2009.2	47	57	73	73	54	60.8	3	5	1	1	0	2
481	2254	2279	2187	2184	2323	2245.4	9	8	13	16	11	11.4	0	0	0	0	0	0		481	1987	2014	2043	2021	2021	2017.2	50	56	75	75	56	62.4	3	5	1	1	0	2
482	2264	2287	2199	2193	2335	2255.6	9	8	13	19	11	12	0	0	0	0	0	0		482	1992	2024	2048	2026	2026	2023.2	53	59	78	78	55	64.6	3	5	1	1	0	2
483	2270	2299	2210	2206	2346	2266.2	8	8	13	19	11	11.8	0	0	0	0	0	0		483	2001	2039	2059	2030	2030	2031.8	53	59	78	78	54	64.4	3	5	1	1	0	2
484	2280	2312	2216	2211	2356	2275	8	8	12	19	11	11.6	0	0	0	0	0	0		484	2008	2042	2066	2038	2038	2038.4	53	59	78	78	53	64.2	3	5	1	1	0	2
485	2292	2324	2223	2219	2372	2286	8	8	12	19	14	12.2	0	0	0	0	0	0		485	2011	2052	2073	2039	2039	2042.8	52	59	77	77	55	64	3	5	1	1	0	2
486	2300	2334	2233	2227	2384	2295.6	8	8	12	19	13	12	0	0	0	0	0	0		486	2017	2058	2082	2046	2046	2049.8	52	58	77	77	55	63.8	3	5	1	1	0	2
487	2312	2341	2237	2232	2396	2303.6	11	8	12	19	13	12.6	0	0	0	0	0	0		487	2023	2061	2089	2055	2055	2056.6	52	57	80	80	55	64.8	3	5	1	1	0	2
488	2322	2351	2242	2240	2408	2312.6	10	11	12	19	12	12.8	0	0	0	0	0	0		488	2031	2065	2094	2061	2061	2062.4	55	57	80	80	57	65.8	3	5	1	1	0	2
489	2331	2361	2250	2249	2419	2322	10	11	11	19	12	12.6	0	0	0	0	0	0		489	2038	2068	2100	2064	2064	2066.8	55	57	80	80	57	65.8	3	5	1	1	0	2
490	2347	2371	2263	2258	2426	2333	16	17	11	19	12	15	0	0	0	0	0	0		490	2043	2082	2108	2072	2072	2075.4	53	57	79	79	57	65	2	5	1	1	0	1.8
491	2358	2375	2269	2267	2437	2341.2	16	17	11	18	12	14.8	0	0	0	0	0	0		491	2055	2088	2116	2078	2078	2083	59	56	79	79	57	66	2	5	1	1	0	1.8
492	2369	2381	2279	2278	2447	2350.8	19	17	11	18	12	15.4	0	0	0	0	0	0		492	2070	2100	2123	2082	2082	2091.4	64	58	81	81	56	68	2	5	1	1	0	1.8
493	2377	2387	2287	2288	2448	2357.4	19	17	10	18	11	15	0	0	0	0	0	0		493	2076	2105	2128	2089	2089	2097.4	69	57	81	81	56	68.8	2	5	1	1	0	1.8
494	2385	2397	2299	2292	2460	2366.6	19	17	10	18	10	14.8	0	0	0	0	0	0		494	2086	2112	2130	2097	2097	2104.4	69	55	81	81	56	68.4	2	5	1	1	0	1.8
495	2387	2406	2307	2313	2472	2377	19	20	13	21	10	16.6	0	0	0	0	0	0		495	2091	2116	2133	2102	2102	2108.8	67	56	80	80	59	68.4	2	5	1	1	0	1.8
496	2392	2414	2318	2320	2483	2385.4	21	20	13	19	10	16.6	0	0	0	0	0	0		496	2095	2130	2142	2107	2107	2116.2	66	55	79	79	59	67.6	2	5	1	1	0	1.8
497	2405	2421	2329	2333	2491	2395.8	24	19	13	19	13	17.6	0	0	0	0	0	0		497	2100	2140	2147	2113	2113	2122.6	66	58	79	79	59	68.2	2	5	1	1	0	1.8
498	2414	2429	2338	2338	2497	2403.2	24	19	12	19	13	17.4	0	0	0	0	0	0		498	2108	2146	2150	2121	2121	2129.2	66	58	78	78	58	67.6	2	5	1	1	0	1.8
499	2425	2438	2348	2350	2509	2414	25	17	12	22	12	17.6	0	0	0	0	0	0		499	2112	2155	2155	2133	2133	2137.6	66	58	78	78	61	68.2	2	5	1	1	0	1.8
500	2430	2449	2357	2357	2519	2422.4	25	17	12	22	12	17.6	0	0	0	0	0	0		500	2116	2164	2169	2143	2143	2147	66	57	81	81	63	69.6	2	5	1	1	0	1.8
501	2441	2459	2366	2365	2527	2431.6	26	20	12	22	12	18.4	0	0	0	0	0	0		501	2122	2169	2177	2150	2150	2153.6	64	56	81	81	62	68.8	2	5	1	1	0	1.8
502	2455	2463	2369	2372	2537	2439.2	29	19	12	22	12	18.8	0	0	0	0	0	0		502	2125	2174	2183	2164	2164	2162	64	59	81	81	62	69.4	2	5	3	3	0	2.6
503	2466	2477	2379	2380	2544	2449.2	29	19	12	22	12	18.8	0	0	0	0	0	0		503	2131	2190	2191	2170	2170	2170.4	63	59	80	80	61	68.6	2	5	3	3	0	2.6
504	2475	2487	2389	2389	2555	2459	27	16	11	21	15	18	0	0	0	0	0	0		504	2145	2203	2198	2182	2182	2182	63	58	80	80	61	68.4	2	5	3	3	0	2.6
505	2480	2492	2395	2400	2568	2467	26	15	11	21	15	17.6	0	0	0	0	0	0		505	2152	2212	2204	2181	2181	2186	63	60	80	80	60	68.6	2	5	3	3	0	2.6
506	2491	2503	2406	2413	2577	2478	24	15	14	21	14	17.6	0	0	0	0	0	0		506	2159	2219	2213	2186	2186	2192.6	67	59	80	80	59	69	2	4	3	3	0	2.4
507	2496	2508	2417	2422	2581	2484.8	24	15	14	24	14	18.2	0	0	0	0	0	0		507	2164	2223	2218	2198	2198	2200.2	66	59	82	82	61	70	2	4	3	3	0	2.4
508	2502	2514	2426	2427	2598	2493.4	23	15	14	23	14	17.8	0	0	0	0	0	0		508	2166	2230	2223	2210	2210	2207.8	64	59	82	82	61	69.6	2	4	3	3	0	2.4
509	2522	2530	2433	2433	2614	2506.4	23	14	13	22	14	17.2	0	0	0	0	0	0		509	2173	2242	2241	2217	2217	2218	67	62	88	88	61	73.2	2	4	3	3	0	2.4
510	2530	2535	2439	2436	2628	2513.6	20	13	13	22	14	16.4	0	0	0	0	0	0		510	2184	2249	2253	2221	2221	2225.6	69	61	88	88	60	73.2	2	5	3	3	0	2.6
511	2543	2545	2447	2449	2639	2524.6	18	13	13	22	13	15.8	0	0	0	0	0	0		511	2191	2256	2260	2235	2235	2235.4	68	60	88	88	61	73	2	5	3	3	0	2.6
512	2554	2554	2455	2458	2647	2533.6	18	13	12	22	13	15.6	0	0	0	0	0	0		512	2193	2269	2268	2248	2248	2245.2	68	64	88	88	63	74.2	3	5	3	3	0	2.8
513	2562	2572	2468	2468	2664	2546.8	17	13	12	21	15	15.6	0	0	0	0	0	0		513	2202	2275	2282	2258	2258	2255	66	64	91	91	64	75.2	3	5	3	3	0	2.8
514	2576	2583	2475	2478	2672	2556.8	17	13	12	24	15	16.2	0	0	0	0	0	0		514	2208	2283	2287	2261	2261	2260	68	68	91	91	64	76.4	3	6	3	3	0	3
515	2593	2592	2485	2491	2681	2568.4	19	11	11	24	15	16	0	0	0	0	0	0		515	2214	2288	2298	2272	2272	2268.8	66	68	91	91	67	76.6	3	6	3	3	0	3
516	2599	2596	2496	2501	2688	2576	18	11	11	26	15	16.2	0	0	0	0	0	0		516	2222	2292	2309	2286	2286	2279	66	68	90	90	66	76	3	6	3	3	0	3
517	2609	2602	2503	2512	2697	2584.6	18	11	11	26	15	16.2	0	0	0	0	0	0		517	2226	2296	2314	2295	2295	2285.2	66	67	89	89	69	76	3	6	3	3	0	3
518	2620	2605	2514	2515	2708	2592.4	18	11	11	26	14	16	0	0	0	0	0	0		518	2236	2302	2322	2300	2300	2292	65	67	88	88	69	75.4	3	6	3	3	0	3
519	2632	2624	2525	2525	2717	2604.6	18	11	11	26	14	16	0	0	0	0	0	0		519	2245	2308	2331	2309	2309	2300.4	65	67	88	88	69	75.4	3	6	3	3	0	3
520	2649	2635	2536	2534	2723	2615.4	18	11	10	26	14	15.8	0	0	0	0	0	0		520	2255	2314	2341	2315	2315	2308	64	67	91	91	69	76.4	3	6	3	3	0	3
521	2654	2642	2546	2544	2735	2624.2	18	11	10	25	14	15.6	0	0	0	0	0	0		521	2273	2320	2349	2323	2323	2317.6	63	66	90	90	68	75.4	3	6	3	3	0	3
522	2667	2652	2558	2551	2741	2633.8	18	11	10	25	16	16	0	0	0	0	0	0		522	2274	2324	2357	2338	2338	2326.2	61	65	89	89	70	74.8	3	6	3	3	0	3
523	2678	2661	2568	2558	2756	2644.2	18	11	10	24	19	16.4	0	0	0	0	0	0		523	2285	2329	2361	2345	2345	2333	59	70	89	89	70	75.4	3	6	3	3	0	3
524	2690	2672	2573	2571	2766	2654.4	17	11	10	24	19	16.2	0	0	0	0	0	0		524	2291	2332	2378	2350	2350	2340.2	58	69	95	95	69	77.2	3	6	3	3	0	3
525	2702	2691	2580	2578	2772	2664.6	17	14	10	23	19	16.6	0	0	0	0	0	0		525	2299	2339	2385	2358	2358	2347.8	59	71	94	94	69	77.4	5	6	3	3	0	3.4
526	2710	2705	2589	2584	2784	2674.4	17	17	10	23	19	17.2	0	0	0	0	0	0		526	2306	2346	2391	2362	2362	2353.4	59	73	97	97	67	78.6	5	6	3	3	0	3.4
527	2719	2717	2601	2591	2791	2683.8	17	17	10	23	18	17	0	0	0	0	0	0		527	2314	2355	2396	2370	2370	2361	59	73	97	97	69	79	5	6	3	3	0	3.4
528	2730	2733	2610	2597	2803	2694.6	17	17	10	22	18	16.8	0	0	0	0	0	0		528	2323	2362	2407	2379	2379	2370	59	73	97	97	69	79	5	6	3	3	0	3.4
529	2731	2738	2620	2609	2809	2701.4	16	17	10	22	18	16.6	0	0	0	0	0	0		529	2331	2367	2416	2389	2389	2378.4	59	73	97	97	72	79.6	5	6	3	3	0	3.4
530	2749	2751	2631	2619	2820	2714	16	17	10	21	18	16.4	0	0	0	0	0	0		530	2345	2370	2425	2396	2396	2386.4	58	72	97	97	71	79	5	6	3	3	0	3.4
531	2757	2759	2637	2626	2825	2720.8	16	17	10	21	17	16.2	0	0	0	0	0	0		531	2355	2374	2428	2406	2406	2393.8	58	72	97	97	75	79.8	5	6	3	3	0	3.4
532	2763	2769	2643	2636	2833	2728.8	16	17	10	21	16	16	0	0	0	0	0	0		532	2356	2384	2434	2419	2419	2402.4	57	72	97	97	77	80	5	6	3	3	0	3.4
533	2773	2778	2651	2649	2841	2738.4	16	17	10	21	16	16	0	0	0	0	0	0		533	2364	2396	2444	2433	2433	2414	57	71	97	97	77	79.8	5	6	3	3	0	3.4
534	2783	2791	2662	2657	2852	2749	16	19	10	21	16	16.4	0	0	0	0	0	0		534	2375	2407	2456	2447	2447	2426.4	55	72	99	99	77	80.4	5	8	3	3	0	3.8
535	2791	2803	2669	2667	2859	2757.8	16	18	10	21	16	16.2	0	0	0	0	0	0		535	2387	2417	2467	2458	2458	2437.4	55	72	99	99	82	81.4	5	8	3	3	0	3.8
536	2802	2816	2682	2671	2868	2767.8	19	21	10	21	15	17.2	0	0	0	0	0	0		536	2396	2423	2474	2468	2468	2445.8	55	71	101	101	84	82.4	5	8	3	3	0	3.8
537	2814	2824	2688	2685	2874	2777	19	21	9	20	14	16.6	0	0	0	0	0	0		537	2407	2434	2483	2475	2475	2454.8	55	71	101	101	84	82.4	5	8	3	3	0	3.8
538	2825	2830	2700	2695	2886	2787.2	19	21	9	20	14	16.6	0	0	0	0	0	0		538	2414	2441	2486	2484	2484	2461.8	54	69	101	101	88	82.6	5	8	3	3	0	3.8
539	2835	2838	2708	2705	2903	2797.8	19	20	9	20	14	16.4	0	0	0	0	0	0		539	2419	2447	2490	2489	2489	2466.8	54	69	100	100	89	82.4	5	8	3	3	2	4.2
540	2844	2845	2721	2712	2911	2806.6	19	19	9	20	14	16.2	0	0	0	0	0	0		540	2423	2454	2496	2502	2502	2475.4	54	68	99	99	89	81.8	7	8	3	3	2	4.6
541	2853	2858	2733	2717	2924	2817	19	19	9	20	14	16.2	0	0	0	0	0	0		541	2430	2464	2503	2505	2505	2481.4	54	67	99	99	89	81.6	7	8	3	3	2	4.6
542	2864	2870	2747	2729	2941	2830.2	19	19	9	20	14	16.2	0	0	0	0	0	0		542	2437	2473	2507	2511	2511	2487.8	53	67	97	97	87	80.2	7	8	3	3	2	4.6
543	2874	2882	2757	2752	2958	2844.6	19	18	9	23	14	16.6	0	0	0	0	0	0		543	2446	2478	2522	2517	2517	2496	53	66	105	105	86	83	7	8	3	3	2	4.6
544	2898	2899	2767	2758	2962	2856.8	19	18	9	23	14	16.6	0	0	0	0	0	0		544	2465	2485	2531	2527	2527	2507	56	66	106	106	84	83.6	7	8	3	3	2	4.6
545	2908	2909	2775	2770	2972	2866.8	18	17	9	23	14	16.2	0	0	0	0	0	0		545	2469	2492	2539	2538	2538	2515.2	56	66	108	108	87	85	7	8	3	3	2	4.6
546	2923	2921	2781	2780	2979	2876.8	18	17	8	23	14	16	0	0	0	0	0	0		546	2481	2499	2549	2543	2543	2523	56	66	108	108	86	84.8	7	8	3	3	2	4.6
547	2932	2932	2791	2793	2988	2887.2	18	17	8	23	14	16	0	0	0	0	0	0		547	2494	2508	2557	2553	2553	2533	60	66	106	106	88	85.2	7	8	3	3	2	4.6
548	2940	2937	2798	2806	3007	2897.6	18	16	8	26	17	17	0	0	0	0	0	0		548	2505	2514	2565	2558	2558	2540	60	64	105	105	87	84.2	7	8	3	3	2	4.6
549	2950	2948	2807	2817	3022	2908.8	18	16	8	26	17	17	0	0	0	0	0	0		549	2522	2525	2574	2568	2568	2551.4	60	64	104	104	88	84	7	8	3	3	2	4.6
550	2966	2961	2817	2827	3027	2919.6	17	18	8	26	17	17.2	0	0	0	0	0	0		550	2534	2527	2587	2576	2576	2560	60	64	107	107	88	85.2	7	8	5	5	2	5.4
551	2972	2968	2829	2839	3040	2929.6	17	18	8	26	17	17.2	0	0	0	0	0	0		551	2541	2535	2593	2593	2593	2571	60	64	107	107	86	84.8	7	8	5	5	2	5.4
552	2986	2982	2834	2844	3051	2939.4	17	18	8	25	17	17	0	0	0	0	0	0		552	2547	2543	2599	2596	2596	2576.2	60	64	107	107	84	84.4	7	8	5	5	2	5.4
553	2995	2995	2844	2855	3064	2950.6	17	21	8	25	17	17.6	0	0	0	0	0	0		553	2553	2544	2613	2604	2604	2583.6	60	62	106	106	86	84	7	8	5	5	2	5.4
554	3005	3002	2852	2863	3073	2959	17	21	7	25	17	17.4	0	0	0	0	0	0		554	2561	2553	2620	2614	2614	2592.4	60	62	106	106	85	83.8	7	8	5	5	2	5.4
555	3018	3017	2864	2873	3079	2970.2	17	21	7	25	17	17.4	0	0	0	0	0	0		555	2574	2560	2619	2618	2618	2597.8	63	62	104	104	85	83.6	7	8	5	5	2	5.4
556	3027	3030	2878	2884	3092	2982.2	17	21	7	25	17	17.4	0	0	0	0	0	0		556	2583	2566	2628	2631	2631	2607.8	64	60	104	104	83	83	7	8	5	5	2	5.4
557	3042	3039	2887	2892	3102	2992.4	17	21	7	23	16	16.8	0	0	0	0	0	0		557	2588	2580	2637	2637	2637	2615.8	64	63	103	103	82	83	7	8	5	5	2	5.4
558	3050	3047	2901	2902	3111	3002.2	17	21	7	23	16	16.8	0	0	0	0	0	0		558	2599	2587	2646	2648	2648	2625.6	64	61	103	103	82	82.6	7	8	5	5	2	5.4
559	3066	3063	2923	2909	3127	3017.6	17	20	7	23	16	16.6	0	0	0	0	0	0		559	2610	2596	2652	2654	2654	2633.2	63	64	104	104	80	83	7	8	5	5	2	5.4
560	3079	3072	2936	2913	3143	3028.6	17	20	7	23	16	16.6	0	0	0	0	0	0		560	2618	2602	2662	2670	2670	2644.4	63	64	104	104	84	83.8	7	8	5	5	2	5.4
561	3099	3085	2945	2921	3154	3040.8	17	20	7	23	16	16.6	0	0	0	0	0	0		561	2634	2605	2667	2677	2677	2652	62	63	103	103	84	83	7	8	5	5	2	5.4
562	3105	3096	2958	2930	3167	3051.2	17	19	7	22	15	16	0	0	0	0	0	0		562	2639	2609	2674	2678	2678	2655.6	62	63	103	103	82	82.6	7	8	5	5	2	5.4
563	3115	3109	2965	2939	3182	3062	17	19	7	22	15	16	0	0	0	0	0	0		563	2647	2623	2686	2690	2690	2667.2	65	71	106	106	85	86.6	7	8	5	5	2	5.4
564	3126	3121	2976	2947	3188	3071.6	17	18	7	22	15	15.8	0	0	0	0	0	0		564	2654	2637	2697	2694	2694	2675.2	65	76	108	108	85	88.4	7	8	5	5	2	5.4
565	3134	3132	2987	2955	3199	3081.4	17	18	7	22	15	15.8	0	0	0	0	0	0		565	2660	2642	2701	2703	2703	2681.8	64	76	110	110	85	89	7	8	5	5	2	5.4
566	3146	3140	2992	2962	3209	3089.8	17	18	7	22	15	15.8	0	0	0	0	0	0		566	2669	2648	2710	2720	2720	2693.4	70	76	108	108	92	90.8	7	8	5	5	2	5.4
567	3156	3149	3009	2973	3220	3101.4	17	17	7	28	15	16.8	0	0	0	0	0	0		567	2679	2661	2718	2726	2726	2702	70	76	108	108	90	90.4	7	8	5	5	2	5.4
568	3167	3165	3027	2986	3235	3116	17	17	10	28	15	17.4	0	0	0	0	0	0		568	2685	2666	2726	2734	2734	2709	70	78	108	108	90	90.8	7	8	5	5	2	5.4
569	3182	3177	3038	3001	3242	3128	17	17	10	28	15	17.4	0	0	0	0	0	0		569	2694	2672	2735	2746	2746	2718.6	69	77	108	108	89	90.2	7	8	5	5	2	5.4
570	3197	3194	3044	3006	3254	3139	20	17	10	28	15	18	0	0	0	0	0	0		570	2704	2683	2739	2759	2759	2728.8	75	77	107	107	88	90.8	7	8	5	5	2	5.4
571	3206	3203	3057	3018	3267	3150.2	23	17	10	28	18	19.2	0	0	0	0	0	0		571	2717	2688	2744	2769	2769	2737.4	76	77	108	108	86	91	7	8	5	5	2	5.4
572	3220	3215	3064	3038	3283	3164	23	17	10	28	18	19.2	0	0	0	0	0	0		572	2729	2695	2759	2787	2787	2751.4	76	76	110	110	89	92.2	7	8	5	5	2	5.4
573	3235	3224	3076	3052	3292	3175.8	23	17	9	28	18	19	0	0	0	0	0	0		573	2730	2703	2766	2795	2795	2757.8	76	75	113	113	89	93.2	7	8	5	5	2	5.4
574	3261	3243	3088	3069	3299	3192	26	20	9	28	18	20.2	0	0	0	0	0	0		574	2741	2715	2781	2805	2805	2769.4	76	78	114	114	88	94	7	8	5	5	2	5.4
575	3271	3253	3103	3082	3316	3205	26	20	9	27	18	20	0	0	0	0	0	0		575	2748	2722	2789	2814	2814	2777.4	76	77	117	117	88	95	7	8	5	5	2	5.4
576	3284	3267	3118	3095	3328	3218.4	26	20	9	25	18	19.6	0	0	0	0	0	0		576	2754	2729	2798	2820	2820	2784.2	73	75	116	116	90	94	7	8	5	5	2	5.4
577	3301	3279	3131	3111	3346	3233.6	28	20	8	28	18	20.4	0	0	0	0	0	0		577	2761	2737	2807	2825	2825	2791	73	75	116	116	92	94.4	7	8	5	5	2	5.4
578	3312	3289	3142	3125	3363	3246.2	28	20	8	28	18	20.4	0	0	0	0	0	0		578	2770	2750	2816	2832	2832	2800	73	79	115	115	95	95.4	7	8	5	5	2	5.4
579	3333	3304	3152	3131	3378	3259.6	30	20	8	28	21	21.4	0	0	0	0	0	0		579	2773	2760	2829	2841	2841	2808.8	73	82	115	115	95	96	7	9	5	5	2	5.6
580	3342	3314	3160	3144	3391	3270.2	29	20	8	28	20	21	0	0	0	0	0	0		580	2782	2769	2836	2859	2859	2821	75	81	117	117	98	97.6	7	9	5	5	2	5.6
581	3350	3323	3177	3156	3407	3282.6	29	20	8	28	23	21.6	0	0	0	0	0	0		581	2794	2783	2845	2874	2874	2834	79	82	118	118	97	98.8	7	9	5	5	2	5.6
582	3363	3336	3183	3166	3418	3293.2	29	19	7	28	23	21.2	0	0	0	0	0	0		582	2804	2791	2853	2879	2879	2841.2	79	85	118	118	96	99.2	7	9	5	5	2	5.6
583	3373	3353	3192	3176	3434	3305.6	28	18	7	28	26	21.4	0	0	0	0	0	0		583	2814	2797	2866	2879	2879	2847	79	85	121	121	96	100.4	7	9	5	5	2	5.6
584	3382	3368	3206	3184	3440	3316	27	18	7	28	26	21.2	0	0	0	0	0	0		584	2820	2809	2870	2884	2884	2853.4	78	87	117	117	96	99	7	9	5	5	2	5.6
585	3390	3385	3221	3195	3451	3328.4	26	18	7	28	28	21.4	0	0	0	0	0	0		585	2828	2814	2877	2902	2902	2864.6	77	85	117	117	102	99.6	7	9	5	5	2	5.6
586	3400	3399	3238	3208	3465	3342	25	18	7	30	28	21.6	0	0	0	0	0	0		586	2832	2830	2883	2911	2911	2873.4	76	88	115	115	105	99.8	7	9	5	5	2	5.6
587	3414	3411	3249	3218	3474	3353.2	25	18	7	29	28	21.4	0	0	0	0	0	0		587	2848	2841	2902	2920	2920	2886.2	82	88	119	119	102	102	7	9	5	5	2	5.6
588	3428	3423	3251	3235	3487	3364.8	26	17	7	29	27	21.2	0	0	0	0	0	0		588	2859	2855	2913	2934	2934	2899	84	87	119	119	101	102	7	9	5	5	2	5.6
589	3438	3434	3265	3250	3496	3376.6	25	17	7	29	27	21	0	0	0	0	0	0		589	2865	2870	2924	2947	2947	2910.6	82	89	119	119	101	102	7	9	5	5	2	5.6
590	3445	3442	3277	3262	3511	3387.4	25	20	7	28	25	21	0	0	0	0	0	0		590	2872	2883	2932	2956	2956	2919.8	81	92	119	119	101	102.4	7	9	5	5	2	5.6
591	3454	3452	3284	3268	3527	3397	24	20	7	27	25	20.6	0	0	0	0	0	0		591	2880	2890	2936	2967	2967	2928	80	92	118	118	101	101.8	7	9	5	5	2	5.6
592	3467	3467	3295	3281	3544	3410.8	24	23	7	26	24	20.8	0	0	0	0	0	0		592	2891	2897	2946	2984	2984	2940.4	80	91	121	121	100	102.6	7	9	5	5	2	5.6
593	3484	3484	3313	3290	3552	3424.6	23	23	7	26	23	20.4	0	0	0	0	0	0		593	2902	2918	2955	2992	2992	2951.8	83	93	121	121	100	103.6	7	9	5	5	2	5.6
594	3498	3499	3326	3306	3560	3437.8	23	23	10	25	22	20.6	0	0	0	0	0	0		594	2909	2931	2966	2994	2994	2958.8	82	95	120	120	100	103.4	7	9	5	5	2	5.6
595	3505	3513	3333	3326	3575	3450.4	23	23	10	26	21	20.6	0	0	0	0	0	0		595	2923	2939	2978	3005	3005	2970	82	95	119	119	106	104.2	7	9	5	5	2	5.6
596	3519	3525	3344	3344	3586	3463.6	23	23	10	26	21	20.6	0	0	0	0	0	0		596	2933	2951	2988	3011	3011	2978.8	82	95	122	122	106	105.4	7	9	5	5	2	5.6
597	3531	3541	3357	3353	3596	3475.6	22	23	13	26	20	20.8	0	0	0	0	0	0		597	2947	2964	3000	3022	3022	2991	80	95	122	122	106	105	7	9	5	5	2	5.6
598	3536	3549	3374	3364	3602	3485	22	23	16	26	20	21.4	0	0	0	0	0	0		598	2960	2975	3008	3028	3028	2999.8	81	95	120	120	103	103.8	7	9	5	5	2	5.6
599	3547	3563	3386	3370	3610	3495.2	22	22	16	26	19	21	0	0	0	0	0	0		599	2969	2981	3022	3043	3043	3011.6	81	94	122	122	103	104.4	7	9	5	5	2	5.6
600	3557	3582	3394	3381	3624	3507.6	22	22	16	28	19	21.4	0	0	0	0	0	0		600	2974	2991	3033	3049	3049	3019.2	83	96	123	123	103	105.6	7	9	5	5	2	5.6
601	3573	3591	3407	3394	3632	3519.4	22	21	16	27	19	21	0	0	0	0	0	0		601	2986	3003	3045	3057	3057	3029.6	89	96	122	122	102	106.2	7	9	5	5	2	5.6
602	3587	3607	3420	3408	3647	3533.8	21	21	16	27	22	21.4	0	0	0	0	0	0		602	2991	3011	3061	3064	3064	3038.2	87	96	124	124	101	106.4	7	9	5	5	2	5.6
603	3594	3618	3436	3422	3659	3545.8	21	21	14	30	22	21.6	0	0	0	0	0	0		603	2994	3023	3073	3071	3071	3046.4	87	98	124	124	98	106.2	7	9	5	5	2	5.6
604	3601	3626	3447	3431	3676	3556.2	21	20	14	29	22	21.2	0	0	0	0	0	0		604	3008	3037	3084	3079	3079	3057.4	90	96	123	123	98	106	7	9	5	5	2	5.6
605	3611	3648	3466	3442	3695	3572.4	21	20	14	29	25	21.8	0	0	0	0	0	0		605	3017	3045	3094	3089	3089	3066.8	90	95	122	122	98	105.4	7	9	5	5	2	5.6
606	3631	3666	3485	3457	3702	3588.2	21	19	13	32	25	22	0	0	0	0	0	0		606	3023	3061	3100	3103	3103	3078	90	98	124	124	98	106.8	7	9	5	5	2	5.6
607	3640	3677	3495	3472	3718	3600.4	21	19	12	32	25	21.8	0	0	0	0	0	0		607	3034	3074	3112	3119	3119	3091.6	90	98	129	129	99	109	7	9	7	7	2	6.4
608	3651	3690	3505	3486	3730	3612.4	21	19	11	32	25	21.6	0	0	0	0	0	0		608	3044	3089	3122	3130	3130	3103	93	98	130	130	102	110.6	7	9	7	7	2	6.4
609	3665	3705	3521	3498	3748	3627.4	21	19	11	30	28	21.8	0	0	0	0	0	0		609	3057	3093	3134	3139	3139	3112.4	96	98	131	131	101	111.4	7	9	7	7	2	6.4
610	3679	3718	3534	3509	3764	3640.8	21	19	11	30	28	21.8	0	0	0	0	0	0		610	3068	3098	3148	3150	3150	3122.8	95	98	130	130	101	110.8	7	9	7	7	2	6.4
611	3689	3726	3548	3520	3776	3651.8	21	19	10	30	27	21.4	0	0	0	0	0	0		611	3075	3107	3154	3157	3157	3130	95	99	130	130	100	110.8	7	9	7	7	2	6.4
612	3705	3742	3558	3528	3791	3664.8	21	19	9	29	27	21	0	0	0	0	0	0		612	3085	3114	3167	3168	3168	3140.4	96	99	130	130	100	111	7	9	7	7	2	6.4
613	3728	3770	3566	3535	3801	3680	21	22	9	29	27	21.6	0	0	0	0	0	0		613	3092	3130	3181	3172	3172	3149.4	95	102	132	132	98	111.8	7	9	7	7	2	6.4
614	3747	3793	3583	3551	3811	3697	24	22	9	31	25	22.2	0	0	0	0	0	0		614	3100	3144	3185	3182	3182	3158.6	96	102	132	132	97	111.8	8	9	7	7	2	6.6
615	3764	3806	3595	3561	3822	3709.6	24	22	9	30	24	21.8	0	0	0	0	0	0		615	3110	3155	3198	3192	3192	3169.4	97	105	137	137	97	114.6	8	9	7	7	2	6.6
616	3777	3817	3607	3577	3836	3722.8	24	22	9	30	23	21.6	0	0	0	0	0	0		616	3116	3164	3208	3200	3200	3177.6	97	104	137	137	94	113.8	8	9	7	7	2	6.6
617	3794	3828	3619	3590	3857	3737.6	27	22	12	29	23	22.6	0	0	0	0	0	0		617	3121	3175	3220	3218	3218	3190.4	95	104	137	137	96	113.8	8	9	7	7	2	6.6
618	3808	3842	3633	3615	3882	3756	27	22	12	34	22	23.4	0	0	0	0	0	0		618	3127	3185	3233	3226	3226	3199.4	98	104	143	143	95	116.6	8	9	7	7	2	6.6
619	3825	3865	3640	3628	3890	3769.6	27	22	12	37	21	23.8	0	0	0	0	0	0		619	3140	3196	3241	3235	3235	3209.4	98	109	143	143	97	118	8	9	7	7	2	6.6
620	3832	3878	3660	3638	3909	3783.4	27	22	15	36	21	24.2	0	0	0	0	0	0		620	3144	3203	3250	3242	3242	3216.2	95	108	144	144	99	118	8	9	7	7	2	6.6
621	3845	3896	3668	3652	3920	3796.2	27	22	15	36	21	24.2	0	0	0	0	0	0		621	3147	3217	3255	3256	3256	3226.2	94	108	146	146	101	119	8	9	7	7	2	6.6
622	3860	3917	3688	3667	3930	3812.4	27	24	15	36	21	24.6	0	0	0	0	0	0		622	3158	3225	3270	3268	3268	3237.8	93	108	149	149	103	120.4	8	9	7	7	2	6.6
623	3876	3932	3700	3676	3948	3826.4	26	24	15	35	23	24.6	0	0	0	0	0	0		623	3166	3233	3288	3286	3286	3251.8	93	108	152	152	106	122.2	8	9	7	7	2	6.6
624	3891	3950	3723	3685	3966	3843	26	24	15	38	23	25.2	0	0	0	0	0	0		624	3180	3241	3294	3292	3292	3259.8	93	106	157	157	106	123.8	8	9	7	7	2	6.6
625	3901	3963	3733	3698	3989	3856.8	26	24	15	38	29	26.4	0	0	0	0	0	0		625	3187	3253	3303	3305	3305	3270.6	93	106	158	158	106	124.2	8	9	7	7	2	6.6
626	3917	3978	3742	3711	4005	3870.6	28	27	14	38	29	27.2	0	0	0	0	0	0		626	3197	3270	3313	3320	3320	3284	96	106	156	156	108	124.4	8	9	7	7	2	6.6
627	3929	3992	3756	3721	4020	3883.6	28	26	14	35	32	27	0	0	0	0	0	0		627	3212	3281	3322	3331	3331	3295.4	98	105	156	156	108	124.6	8	9	7	7	2	6.6
628	3950	4004	3775	3727	4029	3897	27	26	14	33	32	26.4	0	0	0	0	0	0		628	3219	3298	3333	3336	3336	3304.4	98	107	157	157	111	126	8	9	7	7	2	6.6
629	3968	4022	3790	3739	4051	3914	27	26	13	33	32	26.2	0	0	0	0	0	0		629	3231	3313	3346	3347	3347	3316.8	101	110	159	159	110	127.8	8	9	7	7	2	6.6
630	3981	4032	3802	3756	4065	3927.2	27	26	13	33	31	26	0	0	0	0	0	0		630	3241	3330	3356	3355	3355	3327.4	104	116	159	159	110	129.6	8	9	7	7	2	6.6
631	3993	4039	3817	3778	4087	3942.8	25	25	12	36	31	25.8	0	0	0	0	0	0		631	3257	3346	3370	3362	3362	3339.4	107	122	158	158	110	131	8	9	7	7	2	6.6
632	4010	4055	3825	3788	4100	3955.6	28	25	12	34	30	25.8	0	0	0	0	0	0		632	3267	3356	3384	3374	3374	3351	110	123	157	157	112	131.8	8	11	7	7	2	7
633	4024	4074	3837	3796	4112	3968.6	28	25	12	32	29	25.2	0	0	0	0	0	0		633	3277	3369	3393	3382	3382	3360.6	107	129	155	155	115	132.2	8	11	7	7	2	7
634	4039	4089	3849	3814	4124	3983	28	25	11	32	27	24.6	0	0	0	0	0	0		634	3284	3383	3401	3402	3402	3374.4	110	129	152	152	124	133.4	8	11	7	7	2	7
635	4055	4108	3860	3824	4151	3999.6	27	24	10	32	27	24	0	0	0	0	0	0		635	3295	3393	3415	3416	3416	3387	113	130	152	152	126	134.6	8	11	7	7	2	7
636	4067	4119	3879	3840	4169	4014.8	27	23	10	32	26	23.6	0	0	0	0	0	0		636	3309	3408	3425	3420	3420	3396.4	113	128	151	151	125	133.6	8	11	7	7	2	7
637	4079	4134	3891	3856	4186	4029.2	27	23	10	32	25	23.4	0	0	0	0	0	0		637	3319	3419	3433	3432	3432	3407	112	128	150	150	125	133	8	11	7	7	2	7
638	4097	4150	3910	3870	4203	4046	27	23	13	31	25	23.8	0	0	0	0	0	0		638	3336	3432	3438	3440	3440	3417.2	115	127	148	148	121	131.8	8	11	7	7	2	7
639	4109	4164	3926	3884	4225	4061.6	27	23	13	31	23	23.4	0	0	0	0	0	0		639	3342	3446	3455	3452	3452	3429.4	115	130	147	147	121	132	8	11	7	7	2	7
640	4117	4178	3951	3892	4242	4076	26	22	13	29	23	22.6	0	0	0	0	0	0		640	3349	3454	3461	3463	3463	3438	114	129	145	145	120	130.6	8	11	7	7	2	7
641	4132	4192	3973	3901	4251	4089.8	25	22	13	29	22	22.2	0	0	0	0	0	0		641	3359	3457	3468	3471	3471	3445.2	112	128	144	144	119	129.4	8	11	7	7	2	7
642	4151	4206	3980	3922	4263	4104.4	31	28	13	29	22	24.6	0	0	0	0	0	0		642	3373	3470	3479	3478	3478	3455.6	111	131	143	143	119	129.4	8	11	7	7	2	7
643	4168	4223	3995	3944	4273	4120.6	34	31	13	29	22	25.8	0	0	0	0	0	0		643	3382	3478	3494	3493	3493	3468	111	130	142	142	119	128.8	8	11	7	7	2	7
644	4178	4246	4009	3963	4292	4137.6	34	31	13	29	22	25.8	0	0	0	0	0	0		644	3393	3489	3503	3499	3499	3476.6	111	130	140	140	118	127.8	8	11	7	7	2	7
645	4196	4258	4020	3970	4309	4150.6	34	30	13	28	22	25.4	0	0	0	0	0	0		645	3410	3499	3519	3508	3508	3488.8	110	133	142	142	118	129	8	11	7	7	2	7
646	4216	4276	4033	3987	4327	4167.8	36	30	13	27	22	25.6	0	0	0	0	0	0		646	3417	3510	3530	3518	3518	3498.6	109	133	144	144	117	129.4	8	11	7	7	2	7
647	4229	4288	4048	4005	4346	4183.2	36	32	12	30	22	26.4	0	0	0	0	0	0		647	3434	3522	3541	3528	3528	3510.6	108	133	144	144	120	129.8	8	11	7	7	2	7
648	4249	4314	4060	4020	4359	4200.4	39	35	12	30	22	27.6	0	0	0	0	0	0		648	3444	3533	3555	3542	3542	3523.2	107	132	143	143	122	129.4	8	11	7	7	2	7
649	4262	4328	4074	4041	4369	4214.8	39	35	12	30	22	27.6	0	0	0	0	0	0		649	3455	3549	3573	3551	3551	3535.8	106	131	143	143	123	129.2	8	11	7	7	2	7
650	4277	4344	4088	4051	4388	4229.6	39	35	12	30	25	28.2	0	0	0	0	0	0		650	3465	3559	3580	3561	3561	3545.2	106	130	140	140	129	129	8	11	7	7	2	7
651	4301	4352	4110	4063	4404	4246	40	33	12	30	25	28	0	0	0	0	0	0		651	3479	3568	3594	3568	3568	3555.4	106	130	145	145	129	131	8	11	7	7	2	7
652	4316	4371	4125	4083	4425	4264	42	35	14	30	25	29.2	0	0	0	0	0	0		652	3494	3578	3610	3579	3579	3568	105	131	143	143	130	130.4	8	11	7	7	2	7
653	4333	4383	4143	4099	4442	4280	42	35	14	29	28	29.6	0	0	0	0	0	0		653	3502	3587	3621	3588	3588	3577.2	103	133	142	142	133	130.6	8	11	7	7	2	7
654	4348	4392	4165	4114	4454	4294.6	42	35	14	29	28	29.6	0	0	0	0	0	0		654	3512	3601	3633	3600	3600	3589.2	103	136	143	143	133	131.6	10	11	7	7	2	7.4
655	4360	4407	4180	4130	4471	4309.6	40	35	14	29	28	29.2	0	0	0	0	0	0		655	3524	3609	3648	3610	3610	3600.2	103	133	141	141	132	130	10	11	7	7	2	7.4
656	4381	4420	4196	4147	4488	4326.4	38	35	14	28	28	28.6	0	0	0	0	0	0		656	3534	3619	3662	3618	3618	3610.2	106	136	143	143	132	132	10	11	7	7	2	7.4
657	4389	4430	4213	4166	4504	4340.4	36	33	14	28	28	27.8	0	0	0	0	0	0		657	3550	3629	3673	3632	3632	3623.2	109	138	143	143	134	133.4	10	11	7	7	2	7.4
658	4401	4439	4231	4183	4519	4354.6	36	33	14	28	28	27.8	0	0	0	0	0	0		658	3561	3642	3683	3649	3649	3636.8	109	140	142	142	142	135	10	11	7	7	2	7.4
659	4422	4453	4251	4198	4529	4370.6	35	33	14	28	27	27.4	0	0	0	0	0	0		659	3575	3661	3699	3654	3654	3648.6	109	143	141	141	140	134.8	10	11	7	7	2	7.4
660	4432	4464	4263	4211	4548	4383.6	32	33	14	27	27	26.6	0	0	0	0	0	0		660	3587	3679	3709	3664	3664	3660.6	109	142	140	140	139	134	10	11	7	7	2	7.4
661	4449	4483	4283	4224	4567	4401.2	31	31	13	26	27	25.6	0	0	0	0	0	0		661	3604	3689	3716	3679	3679	3673.4	111	140	138	138	141	133.6	10	11	7	7	2	7.4
662	4463	4498	4306	4251	4582	4420	30	30	13	26	26	25	0	0	0	0	0	0		662	3618	3707	3718	3692	3692	3685.4	111	140	136	136	141	132.8	10	11	7	7	2	7.4
663	4481	4517	4324	4267	4598	4437.4	30	30	13	26	26	25	0	0	0	0	0	0		663	3635	3720	3732	3704	3704	3699	111	143	135	135	140	132.8	10	11	7	7	2	7.4
664	4498	4538	4339	4281	4618	4454.8	30	30	13	29	28	26	0	0	0	0	0	0		664	3653	3731	3740	3714	3714	3710.4	113	142	136	136	142	133.8	10	11	7	7	2	7.4
665	4518	4555	4356	4301	4638	4473.6	29	29	13	29	28	25.6	0	0	0	0	0	0		665	3664	3736	3750	3726	3726	3720.4	113	140	138	138	141	134	10	11	7	7	2	7.4
666	4533	4574	4376	4321	4656	4492	27	31	12	32	28	26	0	0	0	0	0	0		666	3679	3755	3763	3737	3737	3734.2	114	142	138	138	145	135.4	10	11	7	7	2	7.4
667	4551	4595	4395	4343	4669	4510.6	27	31	15	32	27	26.4	0	0	0	0	0	0		667	3692	3765	3768	3745	3745	3743	117	144	137	137	144	135.8	10	11	7	7	2	7.4
668	4569	4609	4406	4365	4688	4527.4	27	31	15	32	27	26.4	0	0	0	0	0	0		668	3706	3775	3791	3750	3750	3754.4	120	143	149	149	145	141.2	10	11	7	7	2	7.4
669	4576	4618	4426	4368	4711	4539.8	27	31	15	31	27	26.2	0	0	0	0	0	0		669	3716	3790	3805	3755	3755	3764.2	119	145	149	149	145	141.4	10	11	7	7	2	7.4
670	4593	4638	4438	4390	4727	4557.2	27	30	15	31	27	26	0	0	0	0	0	0		670	3730	3803	3813	3773	3773	3778.4	118	144	148	148	149	141.4	10	11	7	7	2	7.4
671	4607	4648	4448	4408	4742	4570.6	27	30	15	30	27	25.8	0	0	0	0	0	0		671	3743	3820	3826	3792	3792	3794.6	116	143	151	151	148	141.8	10	11	7	7	2	7.4
672	4624	4661	4467	4428	4756	4587.2	27	30	15	33	30	27	0	0	0	0	0	0		672	3763	3833	3835	3803	3803	3807.4	117	143	149	149	147	141	10	11	7	7	2	7.4
673	4640	4680	4484	4435	4767	4601.2	27	30	15	32	29	26.6	0	0	0	0	0	0		673	3774	3843	3858	3819	3819	3822.6	117	143	149	149	149	141.4	10	10	7	7	2	7.2
674	4658	4702	4497	4451	4781	4617.8	27	30	15	32	29	26.6	0	0	0	0	0	0		674	3790	3860	3866	3833	3833	3836.4	115	145	147	147	149	140.6	10	10	7	7	2	7.2
675	4679	4723	4518	4459	4792	4634.2	27	29	18	34	29	27.4	0	0	0	0	0	0		675	3796	3876	3878	3844	3844	3847.6	115	146	147	147	148	140.6	10	10	7	7	2	7.2
676	4695	4745	4535	4476	4815	4653.2	27	29	17	36	35	28.8	0	0	0	0	0	0		676	3811	3893	3893	3860	3860	3863.4	114	146	145	145	149	139.8	10	10	7	7	2	7.2
677	4715	4766	4552	4496	4836	4673	30	35	17	42	38	32.4	0	0	0	0	0	0		677	3823	3901	3903	3877	3877	3876.2	119	146	141	141	152	139.8	11	10	7	7	2	7.4
678	4727	4781	4566	4512	4859	4689	30	35	17	41	37	32	0	0	0	0	0	0		678	3841	3921	3914	3891	3891	3891.6	122	146	143	143	151	141	11	10	7	7	2	7.4
679	4741	4795	4586	4527	4884	4706.6	30	35	17	40	37	31.8	0	0	0	0	0	0		679	3854	3933	3928	3908	3908	3906.2	122	149	142	142	151	141.2	11	10	6	6	2	7
680	4764	4807	4598	4542	4900	4722.2	30	34	15	39	40	31.6	0	0	0	0	0	0		680	3870	3944	3943	3920	3920	3919.4	124	148	143	143	150	141.6	11	10	6	6	2	7
681	4791	4828	4617	4561	4911	4741.6	33	37	14	38	39	32.2	0	0	0	0	0	0		681	3880	3954	3960	3935	3935	3932.8	122	146	145	145	150	141.6	13	10	6	6	2	7.4
682	4804	4851	4634	4576	4931	4759.2	33	37	17	38	39	32.8	0	0	0	0	0	0		682	3890	3970	3968	3950	3950	3945.6	124	144	145	145	153	142.2	15	10	6	6	2	7.8
683	4818	4863	4644	4586	4953	4772.8	33	37	17	38	39	32.8	0	0	0	0	0	0		683	3898	3987	3984	3961	3961	3958.2	124	142	144	144	156	142	15	10	6	6	4	8.2
684	4840	4878	4657	4606	4974	4791	33	36	16	37	39	32.2	0	0	0	0	0	0		684	3919	4007	4000	3976	3976	3975.6	126	147	147	147	159	145.2	15	10	6	6	4	8.2
685	4860	4895	4676	4619	4994	4808.8	33	36	16	39	37	32.2	0	0	0	0	0	0		685	3926	4016	4007	3989	3989	3985.4	129	145	148	148	157	145.4	15	10	6	6	4	8.2
686	4878	4914	4696	4637	5009	4826.8	32	34	16	36	33	30.2	0	0	0	0	0	0		686	3933	4035	4016	4000	4000	3996.8	129	148	146	146	156	145	15	10	6	6	4	8.2
687	4895	4932	4707	4658	5026	4843.6	32	33	16	36	33	30	0	0	0	0	0	0		687	3947	4052	4030	4016	4016	4012.2	131	149	145	145	158	145.6	15	10	6	6	4	8.2
688	4921	4956	4728	4682	5046	4866.6	41	32	16	39	33	32.2	0	0	0	0	0	0		688	3959	4062	4040	4030	4030	4024.2	134	148	145	145	159	146.2	15	10	6	6	4	8.2
689	4940	4978	4739	4704	5057	4883.6	41	32	15	38	32	31.6	0	0	0	0	0	0		689	3974	4075	4057	4046	4046	4039.6	137	146	151	151	159	148.8	15	10	6	6	4	8.2
690	4952	4990	4756	4718	5073	4897.8	40	31	15	37	29	30.4	0	0	0	0	0	0		690	3994	4085	4070	4059	4059	4053.4	137	147	150	150	158	148.4	15	10	6	6	4	8.2
691	4976	5005	4769	4738	5083	4914.2	42	29	14	35	28	29.6	0	0	0	0	0	0		691	4003	4098	4083	4072	4072	4065.6	139	149	150	150	156	148.8	15	10	6	6	4	8.2
692	4999	5027	4788	4759	5118	4938.2	42	29	17	35	28	30.2	0	0	0	0	0	0		692	4014	4114	4092	4081	4081	4076.4	144	158	150	150	155	151.4	15	10	6	6	4	8.2
693	5019	5039	4804	4777	5138	4955.4	42	32	20	35	28	31.4	0	0	0	0	0	0		693	4025	4128	4106	4087	4087	4086.6	144	158	155	155	153	153	15	10	6	6	4	8.2
694	5046	5060	4818	4796	5156	4975.2	42	35	20	34	27	31.6	0	0	0	0	0	0		694	4041	4138	4119	4093	4093	4096.8	143	157	160	160	151	154.2	15	10	6	6	4	8.2
695	5067	5075	4843	4814	5174	4994.6	44	34	20	34	27	31.8	0	0	0	0	0	0		695	4055	4151	4133	4115	4115	4113.8	143	160	157	157	157	154.8	15	10	6	6	4	8.2
696	5080	5092	4856	4831	5204	5012.6	44	34	19	37	30	32.8	0	0	0	0	0	0		696	4073	4166	4153	4132	4132	4131.2	144	163	166	166	157	159.2	15	11	6	6	4	8.4
697	5098	5109	4883	4850	5223	5032.6	41	34	22	36	30	32.6	0	0	0	0	0	0		697	4092	4187	4168	4144	4144	4147	145	168	165	165	154	159.4	16	12	6	6	4	8.8
698	5122	5126	4903	4866	5240	5051.4	40	34	22	39	30	33	0	0	0	0	0	0		698	4109	4197	4179	4163	4163	4162.2	145	167	165	165	162	160.8	16	12	6	6	4	8.8
699	5144	5144	4927	4881	5259	5071	40	34	22	38	30	32.8	0	0	0	0	0	0		699	4124	4208	4196	4172	4172	4174.4	144	167	168	168	162	161.8	16	12	6	6	4	8.8
700	5166	5163	4950	4894	5280	5090.6	39	34	22	38	33	33.2	0	0	0	0	0	0		700	4141	4225	4207	4185	4185	4188.6	144	169	170	170	162	163	16	12	6	6	4	8.8
701	5178	5185	4966	4909	5306	5108.8	39	34	24	38	33	33.6	0	0	0	0	0	0		701	4152	4233	4219	4198	4198	4200	142	172	171	171	161	163.4	16	12	6	6	4	8.8
702	5199	5194	4987	4925	5335	5128	36	33	23	37	36	33	0	0	0	0	0	0		702	4159	4245	4237	4218	4218	4215.4	142	172	170	170	163	163.4	16	12	6	6	4	8.8
703	5223	5211	5001	4943	5354	5146.4	36	32	23	40	36	33.4	0	0	0	0	0	0		703	4175	4256	4242	4234	4234	4228.2	145	171	168	168	164	163.2	16	12	6	6	4	8.8
704	5238	5235	5023	4958	5364	5163.6	35	35	26	43	36	35	0	0	0	0	0	0		704	4188	4268	4257	4250	4250	4242.6	146	172	171	171	166	165.2	16	12	6	6	4	8.8
705	5252	5265	5036	4979	5388	5184	34	38	26	42	35	35	0	0	0	0	0	0		705	4205	4279	4268	4268	4268	4257.6	146	177	173	173	169	167.6	16	12	7	7	4	9.2
706	5270	5290	5051	4995	5405	5202.2	37	38	24	42	35	35.2	0	0	0	0	0	0		706	4213	4289	4281	4286	4286	4271	144	176	170	170	172	166.4	15	12	7	7	4	9
707	5295	5303	5071	5016	5426	5222.2	43	37	23	41	34	35.6	0	0	0	0	0	0		707	4225	4301	4295	4301	4301	4284.6	147	175	169	169	169	165.8	15	12	7	7	4	9
708	5321	5322	5084	5035	5451	5242.6	43	36	23	44	37	36.6	0	0	0	0	0	0		708	4241	4311	4309	4316	4316	4298.6	150	173	167	167	168	165	15	12	7	7	4	9
709	5342	5344	5107	5050	5472	5263	45	39	23	44	36	37.4	0	0	0	0	0	0		709	4255	4330	4323	4325	4325	4311.6	152	175	168	168	164	165.4	15	12	7	7	4	9
710	5369	5362	5129	5063	5495	5283.6	45	39	22	43	35	36.8	0	0	0	0	0	0		710	4274	4341	4337	4348	4348	4329.6	156	174	170	170	168	167.6	15	12	7	7	6	9.4
711	5394	5383	5153	5087	5508	5305	45	39	21	43	34	36.4	0	0	0	0	0	0		711	4284	4357	4348	4366	4366	4344.2	156	172	173	173	165	167.8	15	12	7	7	6	9.4
712	5419	5398	5174	5106	5527	5324.8	48	39	24	41	37	37.8	0	0	0	0	0	0		712	4299	4370	4366	4381	4381	4359.4	159	172	175	175	166	169.4	15	12	7	7	6	9.4
713	5434	5425	5196	5120	5549	5344.8	48	41	23	40	40	38.4	0	0	0	0	0	0		713	4313	4382	4378	4398	4398	4373.8	163	170	175	175	170	170.6	15	12	7	7	6	9.4
714	5455	5444	5220	5136	5579	5366.8	47	43	23	40	39	38.4	0	0	0	0	0	0		714	4342	4395	4391	4421	4421	4394	165	169	175	175	170	170.8	15	12	7	7	6	9.4
715	5470	5461	5232	5156	5605	5384.8	45	43	22	40	42	38.4	0	0	0	0	0	0		715	4349	4404	4407	4441	4441	4408.4	164	168	175	175	173	171	15	12	7	7	6	9.4
716	5476	5485	5250	5180	5623	5402.8	43	43	22	40	41	37.8	0	0	0	0	0	0		716	4368	4419	4426	4453	4453	4423.8	167	173	177	177	173	173.4	15	12	7	7	6	9.4
717	5497	5509	5264	5200	5648	5423.6	43	43	22	38	40	37.2	0	0	0	0	0	0		717	4381	4430	4436	4467	4467	4436.2	168	170	177	177	170	172.4	14	12	7	7	6	9.2
718	5516	5526	5288	5218	5678	5445.2	45	41	21	40	40	37.4	0	0	0	0	0	0		718	4403	4447	4445	4486	4486	4453.4	169	169	175	175	170	171.6	15	12	7	7	6	9.4
719	5532	5554	5314	5241	5699	5468	45	43	21	40	40	37.8	0	0	0	0	0	0		719	4412	4458	4462	4497	4497	4465.2	173	169	174	174	169	171.8	15	12	7	7	6	9.4
720	5551	5571	5333	5254	5718	5485.4	43	46	24	39	40	38.4	0	0	0	0	0	0		720	4419	4480	4476	4514	4514	4480.6	173	169	174	174	170	172	15	12	8	8	6	9.8
721	5576	5590	5352	5275	5735	5505.6	40	46	23	39	42	38	0	0	0	0	0	0		721	4434	4490	4490	4530	4530	4494.8	178	168	175	175	172	173.6	15	12	8	8	6	9.8
722	5600	5604	5377	5304	5745	5526	40	45	23	38	40	37.2	0	0	0	0	0	0		722	4450	4508	4502	4541	4541	4508.4	181	171	177	177	171	175.4	15	12	8	8	6	9.8
723	5611	5622	5388	5323	5774	5543.6	39	42	23	41	40	37	0	0	0	0	0	0		723	4460	4524	4522	4563	4563	4526.4	181	173	176	176	177	176.6	15	12	8	8	6	9.8
724	5630	5646	5403	5343	5792	5562.8	39	45	23	41	39	37.4	0	0	0	0	0	0		724	4473	4538	4537	4575	4575	4539.6	179	173	175	175	180	176.4	15	12	8	8	6	9.8
725	5649	5675	5424	5356	5817	5584.2	39	45	23	41	42	38	0	0	0	0	0	0		725	4491	4550	4553	4598	4598	4558	178	174	177	177	187	178.6	15	12	8	8	6	9.8
726	5675	5693	5443	5374	5831	5603.2	38	45	22	41	41	37.4	0	0	0	0	0	0		726	4500	4560	4563	4618	4618	4571.8	178	172	176	176	190	178.4	15	12	8	8	6	9.8
727	5692	5716	5473	5389	5858	5625.6	37	43	25	40	40	37	0	0	0	0	0	0		727	4518	4576	4575	4625	4625	4583.8	178	174	176	176	188	178.4	14	12	8	8	6	9.6
728	5710	5740	5493	5413	5876	5646.4	37	41	25	40	40	36.6	0	0	0	0	0	0		728	4535	4589	4582	4642	4642	4598	177	171	175	175	186	176.8	14	12	8	8	6	9.6
729	5735	5757	5504	5424	5897	5663.4	37	43	24	40	39	36.6	0	0	0	0	0	0		729	4548	4603	4602	4653	4653	4611.8	182	174	181	181	186	180.8	14	12	7	7	6	9.2
730	5763	5774	5533	5441	5911	5684.4	37	43	30	40	37	37.4	0	0	0	0	0	0		730	4567	4613	4615	4671	4671	4627.4	183	172	184	184	184	181.4	14	12	7	7	6	9.2
731	5786	5798	5565	5454	5944	5709.4	37	43	30	40	37	37.4	0	0	0	0	0	0		731	4582	4622	4635	4686	4686	4642.2	182	171	185	185	185	181.6	14	12	9	9	6	10
732	5803	5818	5583	5480	5962	5729.2	36	49	30	38	37	38	0	0	0	0	0	0		732	4601	4639	4640	4695	4695	4654	183	170	185	185	186	181.8	14	12	9	9	6	10
733	5819	5832	5603	5499	5974	5745.4	36	47	30	40	37	38	0	0	0	0	0	0		733	4621	4648	4662	4703	4703	4667.4	186	169	183	183	185	181.2	16	12	9	9	6	10.4
734	5846	5855	5627	5518	5996	5768.4	39	52	32	40	36	39.8	0	0	0	0	0	0		734	4630	4671	4678	4723	4723	4685	184	169	182	182	185	180.4	16	12	9	9	6	10.4
735	5859	5882	5645	5533	6008	5785.4	39	52	32	40	34	39.4	0	0	0	0	0	0		735	4646	4689	4696	4738	4738	4701.4	185	170	188	188	183	182.8	16	14	10	10	6	11.2
736	5872	5893	5675	5557	6037	5806.8	39	52	31	40	34	39.2	0	0	0	0	0	0		736	4663	4707	4713	4755	4755	4718.6	188	173	188	188	181	183.6	16	15	10	10	6	11.4
737	5888	5917	5701	5575	6062	5828.6	38	52	31	38	34	38.6	0	0	0	0	0	0		737	4675	4722	4732	4775	4775	4735.8	188	171	186	186	180	182.2	16	15	10	10	7	11.6
738	5911	5943	5722	5597	6090	5852.6	38	50	31	38	34	38.2	0	0	0	0	0	0		738	4690	4737	4746	4786	4786	4749	189	170	185	185	178	181.4	16	15	10	10	7	11.6
739	5937	5969	5742	5616	6114	5875.6	39	50	29	41	33	38.4	0	0	0	0	0	0		739	4708	4757	4765	4802	4802	4766.8	188	172	187	187	180	182.8	16	15	10	10	7	11.6
740	5957	5987	5757	5638	6139	5895.6	39	50	29	40	33	38.2	0	0	0	0	0	0		740	4721	4769	4792	4824	4824	4786	189	173	196	196	182	187.2	16	15	10	10	7	11.6
741	5978	6016	5777	5667	6161	5919.8	39	46	28	40	33	37.2	0	0	0	0	0	0		741	4737	4785	4809	4845	4845	4804.2	185	174	195	195	184	186.6	16	15	10	10	7	11.6
742	6008	6037	5807	5682	6183	5943.4	39	46	28	39	33	37	0	0	0	0	0	0		742	4747	4793	4829	4856	4856	4816.2	184	173	194	194	185	186	16	15	10	10	7	11.6
743	6032	6054	5824	5703	6204	5963.4	38	43	30	42	33	37.2	0	0	0	0	0	0		743	4755	4806	4841	4869	4869	4828	185	173	196	196	188	187.6	16	15	12	12	7	12.4
744	6058	6078	5836	5725	6224	5984.2	41	43	31	42	33	38	0	0	0	0	0	0		744	4768	4817	4854	4885	4885	4841.8	187	171	196	196	189	187.8	16	15	12	12	7	12.4
745	6085	6103	5858	5742	6247	6007	44	43	31	42	33	38.6	0	0	0	0	0	0		745	4778	4830	4874	4906	4906	4858.8	185	176	199	199	187	189.2	16	15	12	12	7	12.4
746	6111	6124	5879	5764	6267	6029	44	41	31	45	33	38.8	0	0	0	0	0	0		746	4797	4841	4897	4926	4926	4877.4	187	179	199	199	186	190	16	16	12	12	7	12.6
747	6143	6146	5905	5785	6294	6054.6	44	41	31	44	33	38.6	0	0	0	0	0	0		747	4811	4863	4917	4938	4938	4893.4	187	182	200	200	182	190.2	16	16	12	12	7	12.6
748	6162	6164	5923	5802	6321	6074.4	42	39	30	42	33	37.2	0	0	0	0	0	0		748	4824	4877	4935	4953	4953	4908.4	188	180	200	200	183	190.2	16	16	12	12	8	12.8
749	6188	6185	5951	5818	6346	6097.6	42	39	30	42	33	37.2	0	0	0	0	0	0		749	4841	4890	4952	4968	4968	4923.8	188	179	203	203	184	191.4	16	16	12	12	8	12.8
750	6214	6220	5968	5839	6367	6121.6	42	39	30	42	36	37.8	0	0	0	0	0	0		750	4853	4902	4975	4975	4975	4936	189	179	209	209	180	193.2	16	16	12	12	8	12.8
751	6237	6248	5989	5858	6393	6145	42	42	30	42	36	38.4	0	0	0	0	0	0		751	4875	4917	4991	4994	4994	4954.2	188	178	208	208	180	192.4	16	17	12	12	8	13
752	6267	6274	6021	5869	6413	6168.8	42	42	32	41	36	38.6	0	0	0	0	0	0		752	4889	4934	5004	5019	5019	4973	187	178	205	205	185	192	16	17	12	12	8	13
753	6288	6294	6041	5893	6436	6190.4	40	42	31	40	42	39	0	0	0	0	0	0		753	4897	4943	5023	5036	5036	4987	186	176	205	205	188	192	18	17	13	13	8	13.8
754	6307	6312	6068	5919	6453	6211.8	42	42	40	40	42	41.2	0	0	0	0	0	0		754	4906	4962	5033	5057	5057	5003	186	176	204	204	190	192	19	17	13	13	8	14
755	6335	6329	6086	5936	6468	6230.8	42	45	40	39	42	41.6	0	0	0	0	0	0		755	4921	4973	5053	5081	5081	5021.8	188	175	210	210	189	194.4	19	17	13	13	7	13.8
756	6362	6354	6108	5951	6502	6255.4	42	45	40	39	42	41.6	0	0	0	0	0	0		756	4942	4988	5068	5103	5103	5040.8	190	176	208	208	189	194.2	19	16	13	13	7	13.6
757	6382	6373	6126	5975	6529	6277	42	45	39	37	45	41.6	0	0	0	0	0	0		757	4957	5010	5085	5127	5127	5061.2	187	178	209	209	188	194.2	19	16	13	13	7	13.6
758	6415	6394	6143	6003	6556	6302.2	41	44	38	43	45	42.2	0	0	0	0	0	0		758	4969	5033	5100	5136	5136	5074.8	185	181	209	209	189	194.6	19	16	13	13	7	13.6
759	6433	6417	6163	6029	6574	6323.2	40	44	38	43	47	42.4	0	0	0	0	0	0		759	4979	5053	5111	5156	5156	5091	183	180	208	208	190	193.8	19	16	13	13	7	13.6
760	6456	6439	6181	6048	6601	6345	40	43	38	42	49	42.4	0	0	0	0	0	0		760	5002	5071	5132	5170	5170	5109	184	191	211	211	190	197.4	19	16	13	13	7	13.6
761	6475	6470	6199	6065	6624	6366.6	40	43	37	42	49	42.2	0	0	0	0	0	0		761	5017	5095	5151	5193	5193	5129.8	184	191	210	210	193	197.6	19	16	13	13	7	13.6
762	6491	6497	6221	6084	6651	6388.8	43	46	37	41	47	42.8	0	0	0	0	0	0		762	5030	5113	5170	5219	5219	5150.2	182	191	209	209	196	197.4	19	16	13	13	7	13.6
763	6517	6522	6244	6110	6680	6414.6	42	46	37	44	47	43.2	0	0	0	0	0	0		763	5050	5127	5185	5238	5238	5167.6	184	192	207	207	197	197.4	19	16	13	13	7	13.6
764	6538	6545	6263	6132	6704	6436.4	42	45	37	44	45	42.6	0	0	0	0	0	0		764	5069	5136	5198	5262	5262	5185.4	190	190	212	212	197	200.2	19	16	15	15	7	14.4
765	6558	6563	6290	6149	6729	6457.8	41	44	40	44	48	43.4	0	0	0	0	0	0		765	5088	5151	5213	5283	5283	5203.6	190	190	216	216	200	202.4	19	16	15	15	7	14.4
766	6579	6597	6302	6172	6742	6478.4	44	50	39	44	46	44.6	0	0	0	0	0	0		766	5107	5165	5231	5301	5301	5221	192	190	214	214	203	202.6	19	16	15	15	9	14.8
767	6603	6629	6325	6190	6765	6502.4	44	50	42	42	44	44.4	0	0	0	0	0	0		767	5127	5188	5249	5321	5321	5241.2	195	189	215	215	208	204.4	19	16	15	15	9	14.8
768	6627	6654	6341	6219	6795	6527.2	43	50	39	42	43	43.4	0	0	0	0	0	0		768	5135	5202	5264	5341	5341	5256.6	193	186	212	212	207	202	19	16	15	15	9	14.8
769	6653	6676	6367	6245	6822	6552.6	43	49	39	42	42	43	0	0	0	0	0	0		769	5151	5220	5278	5362	5362	5274.6	192	188	219	219	208	205.2	19	16	15	15	9	14.8
770	6687	6705	6399	6262	6852	6581	46	49	39	42	45	44.2	0	0	0	0	0	0		770	5170	5240	5291	5374	5374	5289.8	198	188	216	216	207	205	19	16	15	15	9	14.8
771	6710	6732	6424	6288	6880	6606.8	45	48	39	42	47	44.2	0	0	0	0	0	0		771	5194	5255	5301	5390	5390	5306	200	191	214	214	213	206.4	19	16	15	15	9	14.8
772	6728	6757	6451	6304	6901	6628.2	45	51	38	38	47	43.8	0	0	0	0	0	0		772	5203	5268	5317	5413	5413	5322.8	198	189	215	215	213	206	19	16	15	15	9	14.8
773	6757	6786	6475	6325	6928	6654.2	45	51	38	38	46	43.6	0	0	0	0	0	0		773	5224	5282	5329	5431	5431	5339.4	198	192	212	212	215	205.8	19	16	15	15	9	14.8
774	6788	6819	6500	6355	6951	6682.6	51	57	43	38	46	47	0	0	0	0	0	0		774	5242	5298	5345	5452	5452	5357.8	200	192	212	212	213	205.8	19	16	15	15	9	14.8
775	6815	6844	6524	6373	6969	6705	50	55	43	38	46	46.4	0	0	0	0	0	0		775	5261	5319	5375	5472	5472	5379.8	200	192	216	216	215	207.8	19	16	15	15	9	14.8
776	6840	6864	6547	6397	6998	6729.2	48	54	42	41	49	46.8	0	0	0	0	0	0		776	5272	5339	5390	5490	5490	5396.2	200	192	216	216	217	208.2	19	16	15	15	9	14.8
777	6868	6889	6572	6422	7025	6755.2	47	54	41	43	49	46.8	0	0	0	0	0	0		777	5288	5356	5407	5506	5506	5412.6	198	190	218	218	214	207.6	19	16	15	15	9	14.8
778	6890	6916	6598	6444	7052	6780	47	54	44	43	48	47.2	0	0	0	0	0	0		778	5300	5377	5424	5524	5524	5429.8	196	196	216	216	212	207.2	19	16	14	14	9	14.4
779	6917	6935	6621	6469	7077	6803.8	49	54	43	43	49	47.6	0	0	0	0	0	0		779	5322	5397	5444	5549	5549	5452.2	196	196	215	215	214	207.2	19	16	14	14	9	14.4
780	6953	6967	6643	6489	7096	6829.6	51	58	43	43	48	48.6	0	0	0	0	0	0		780	5334	5415	5456	5570	5570	5469	195	199	214	214	217	207.8	19	16	14	14	9	14.4
781	6985	6995	6668	6516	7119	6856.6	51	60	41	43	48	48.6	0	0	0	0	0	0		781	5354	5432	5471	5585	5585	5485.4	196	199	214	214	217	208	19	16	14	14	9	14.4
782	7014	7020	6690	6535	7141	6880	51	59	41	43	48	48.4	0	0	0	0	0	0		782	5373	5449	5487	5596	5596	5500.2	193	199	218	218	216	208.8	18	17	14	14	9	14.4
783	7029	7049	6709	6560	7167	6902.8	49	60	39	43	50	48.2	0	0	0	0	0	0		783	5383	5471	5519	5616	5616	5521	197	199	219	219	214	209.6	18	17	14	14	9	14.4
784	7061	7078	6729	6580	7187	6927	48	60	39	43	49	47.8	0	0	0	0	0	0		784	5405	5483	5537	5637	5637	5539.8	197	200	218	218	217	210	19	17	14	14	9	14.6
785	7085	7098	6754	6611	7208	6951.2	51	60	39	45	47	48.4	0	0	0	0	0	0		785	5420	5496	5558	5652	5652	5555.6	198	203	223	223	215	212.4	19	17	16	16	9	15.4
786	7106	7121	6782	6628	7229	6973.2	54	59	39	42	47	48.2	0	0	0	0	0	0		786	5440	5509	5577	5670	5670	5573.2	197	205	228	228	215	214.6	19	17	16	16	9	15.4
787	7136	7149	6804	6646	7259	6998.8	53	58	38	41	47	47.4	0	0	0	0	0	0		787	5461	5525	5598	5691	5691	5593.2	196	205	230	230	218	215.8	20	17	16	16	9	15.6
788	7164	7170	6833	6674	7281	7024.4	49	56	39	41	45	46	0	0	0	0	0	0		788	5478	5540	5627	5709	5709	5612.6	198	208	236	236	219	219.4	20	19	15	15	9	15.6
789	7192	7199	6862	6706	7309	7053.6	48	54	45	44	44	47	0	0	0	0	0	0		789	5492	5558	5642	5722	5722	5627.2	198	210	234	234	217	218.6	20	19	15	15	11	16
790	7223	7225	6888	6729	7341	7081.2	48	52	48	46	43	47.4	0	0	0	0	0	0		790	5508	5573	5663	5734	5734	5642.4	195	210	233	233	215	217.2	20	19	15	15	11	16
791	7241	7261	6916	6760	7377	7111	48	55	48	48	43	48.4	0	0	0	0	0	0		791	5525	5584	5680	5755	5755	5659.8	200	210	229	229	219	217.4	20	19	15	15	11	16
792	7265	7294	6941	6791	7407	7139.6	48	54	50	48	45	49	0	0	0	0	0	0		792	5542	5598	5703	5774	5774	5678.2	200	209	227	227	224	217.4	20	19	15	15	11	16
793	7287	7323	6968	6809	7436	7164.6	47	56	50	47	44	48.8	0	0	0	0	0	0		793	5559	5621	5713	5795	5795	5696.6	200	206	225	225	223	215.8	20	19	15	15	11	16
794	7313	7363	6997	6832	7466	7194.2	45	54	50	46	44	47.8	0	0	0	0	0	0		794	5580	5646	5729	5824	5824	5720.6	200	212	230	230	226	219.6	20	21	15	15	11	16.4
795	7336	7388	7018	6861	7492	7219	44	53	50	46	44	47.4	0	0	0	0	0	0		795	5600	5672	5744	5853	5853	5744.4	199	213	229	229	226	219.2	20	21	15	15	11	16.4
796	7367	7418	7039	6888	7515	7245.4	50	52	50	49	44	49	0	0	0	0	0	0		796	5610	5687	5759	5872	5872	5760	205	213	228	228	223	219.4	20	21	15	15	11	16.4
797	7387	7444	7060	6918	7544	7270.6	50	54	49	49	43	49	0	0	0	0	0	0		797	5630	5704	5780	5898	5898	5782	206	213	227	227	223	219.2	20	21	15	15	11	16.4
798	7410	7469	7080	6940	7571	7294	50	54	47	48	43	48.4	0	0	0	0	0	0		798	5647	5722	5790	5920	5920	5799.8	209	212	224	224	220	217.8	22	21	15	15	11	16.8
799	7430	7501	7091	6961	7605	7317.6	49	54	46	46	46	48.2	0	0	0	0	0	0		799	5658	5744	5802	5936	5936	5815.2	208	216	224	224	219	218.2	22	22	15	15	11	17
800	7464	7525	7114	6988	7631	7344.4	51	53	46	51	46	49.4	0	0	0	0	0	0		800	5673	5758	5817	5953	5953	5830.8	207	215	223	223	221	217.8	22	22	15	15	11	17
801	7492	7554	7135	7019	7670	7374	53	56	45	51	48	50.6	0	0	0	0	0	0		801	5695	5782	5833	5969	5969	5849.6	213	215	222	222	221	218.6	22	22	15	15	11	17
802	7530	7572	7163	7046	7688	7399.8	56	55	44	51	48	50.8	0	0	0	0	0	0		802	5709	5797	5854	5989	5989	5867.6	214	212	223	223	219	218.2	22	22	15	15	11	17
803	7552	7606	7194	7072	7707	7426.2	56	58	42	53	48	51.4	0	0	0	0	0	0		803	5741	5818	5870	6006	6006	5888.2	217	212	221	221	218	217.8	22	21	15	15	11	16.8
804	7578	7634	7214	7095	7728	7449.8	56	61	41	52	48	51.6	0	0	0	0	0	0		804	5761	5831	5883	6029	6029	5906.6	218	211	222	222	223	219.2	24	21	15	15	11	17.2
805	7602	7661	7238	7118	7763	7476.4	54	60	41	50	48	50.6	0	0	0	0	0	0		805	5780	5857	5908	6056	6056	5931.4	219	213	228	228	224	222.4	24	22	15	15	11	17.4
806	7634	7674	7259	7145	7796	7501.6	57	58	40	50	47	50.4	0	0	0	0	0	0		806	5803	5883	5931	6068	6068	5950.6	225	216	227	227	223	223.6	24	22	15	15	11	17.4
807	7662	7699	7278	7169	7828	7527.2	57	57	40	50	47	50.2	0	0	0	0	0	0		807	5838	5906	5953	6084	6084	5973	231	216	232	232	221	226.4	24	22	15	15	11	17.4
808	7689	7731	7316	7198	7857	7558.2	57	57	40	50	46	50	0	0	0	0	0	0		808	5854	5928	5970	6114	6114	5996	233	216	229	229	226	226.6	24	22	15	15	11	17.4
809	7709	7766	7353	7216	7898	7588.4	56	60	40	51	49	51.2	0	0	0	0	0	0		809	5875	5945	5995	6131	6131	6015.4	233	214	231	231	223	226.4	24	22	15	15	11	17.4
810	7730	7789	7384	7249	7915	7613.4	53	62	40	50	48	50.6	0	0	0	0	0	0		810	5897	5958	6013	6154	6154	6035.2	232	214	232	232	223	226.6	24	22	15	15	11	17.4
811	7764	7817	7410	7271	7955	7643.4	52	61	40	49	48	50	0	0	0	0	0	0		811	5908	5981	6026	6172	6172	6051.8	232	222	231	231	222	227.6	24	22	15	15	11	17.4
812	7787	7849	7435	7307	7987	7673	55	60	39	48	51	50.6	0	0	0	0	0	0		812	5926	5999	6053	6187	6187	6070.4	229	217	237	237	223	228.6	24	22	15	15	11	17.4
813	7815	7877	7459	7336	8013	7700	55	59	42	48	56	52	0	0	0	0	0	0		813	5942	6022	6073	6206	6206	6089.8	229	218	237	237	223	228.8	24	21	14	14	11	16.8
814	7847	7911	7482	7363	8038	7728.2	54	59	42	49	56	52	0	0	0	0	0	0		814	5966	6054	6087	6220	6220	6109.4	229	219	239	239	223	229.8	24	23	14	14	11	17.2
815	7879	7930	7510	7389	8067	7755	52	58	44	49	55	51.6	0	0	0	0	0	0		815	5990	6070	6107	6255	6255	6135.4	229	221	237	237	228	230.4	24	23	14	14	11	17.2
816	7908	7967	7527	7415	8097	7782.8	51	60	44	52	55	52.4	0	0	0	0	0	0		816	6010	6094	6130	6274	6274	6156.4	231	223	237	237	229	231.4	23	23	14	14	11	17
817	7938	7999	7556	7458	8137	7817.6	51	59	50	54	58	54.4	0	0	0	0	0	0		817	6029	6121	6150	6291	6291	6176.4	234	222	238	238	228	232	23	25	14	14	11	17.4
818	7967	8026	7590	7488	8155	7845.2	54	57	53	53	57	54.8	0	0	0	0	0	0		818	6049	6136	6169	6310	6310	6194.8	235	224	241	241	228	233.8	23	25	14	14	11	17.4
819	7993	8052	7629	7507	8180	7872.2	54	56	53	53	56	54.4	0	0	0	0	0	0		819	6064	6151	6195	6329	6329	6213.6	235	224	243	243	229	234.8	23	25	14	14	11	17.4
820	8022	8078	7656	7534	8206	7899.2	53	55	58	53	56	55	0	0	0	0	0	0		820	6100	6183	6214	6350	6350	6239.4	238	231	246	246	229	238	23	25	14	14	11	17.4
821	8054	8103	7681	7562	8246	7929.2	52	55	58	53	55	54.6	0	0	0	0	0	0		821	6111	6208	6229	6365	6365	6255.6	238	237	248	248	228	239.8	23	25	14	14	11	17.4
822	8080	8134	7709	7597	8276	7959.2	52	55	57	53	53	54	0	0	0	0	0	0		822	6124	6232	6245	6381	6381	6272.6	240	243	245	245	228	240.2	23	25	14	14	11	17.4
823	8114	8165	7743	7631	8307	7992	51	59	60	51	58	55.8	0	0	0	0	0	0		823	6145	6251	6269	6398	6398	6292.2	240	241	244	244	230	239.8	23	24	14	14	11	17.2
824	8139	8198	7781	7657	8340	8023	51	61	59	51	58	56	0	0	0	0	0	0		824	6167	6267	6300	6414	6414	6312.4	241	238	252	252	232	243	23	24	13	13	11	16.8
825	8175	8229	7810	7690	8367	8054.2	51	59	59	53	58	56	0	0	0	0	0	0		825	6188	6293	6326	6429	6429	6333	240	238	252	252	237	243.8	24	24	13	13	11	17
826	8209	8264	7848	7714	8397	8086.4	50	59	63	52	55	55.8	0	0	0	0	0	0		826	6225	6310	6356	6444	6444	6355.8	246	238	249	249	240	244.4	24	24	13	13	11	17
827	8228	8300	7876	7740	8424	8113.6	49	59	61	52	53	54.8	0	0	0	0	0	0		827	6243	6331	6388	6454	6454	6374	247	237	249	249	241	244.6	24	24	13	13	11	17
828	8247	8330	7927	7766	8469	8147.8	49	62	61	51	53	55.2	0	0	0	0	0	0		828	6253	6345	6415	6462	6462	6387.4	244	237	246	246	245	243.6	24	24	13	13	11	17
829	8274	8357	7952	7807	8503	8178.6	52	62	58	54	53	55.8	0	0	0	0	0	0		829	6273	6375	6442	6479	6479	6409.6	247	241	243	243	245	243.8	24	24	13	13	11	17
830	8312	8383	7974	7841	8526	8207.2	52	60	58	53	52	55	0	0	0	0	0	0		830	6295	6399	6473	6496	6496	6431.8	247	239	245	245	252	245.6	24	24	13	13	12	17.2
831	8338	8413	7992	7871	8556	8234	51	60	56	58	54	55.8	0	0	0	0	0	0		831	6308	6435	6484	6518	6518	6452.6	249	244	245	245	256	247.8	24	26	13	13	12	17.6
832	8368	8447	8020	7900	8598	8266.6	50	58	54	58	55	55	0	0	0	0	0	0		832	6329	6460	6500	6530	6530	6469.8	249	247	246	246	255	248.6	25	26	13	13	12	17.8
833	8399	8483	8036	7919	8623	8292	50	63	53	58	58	56.4	0	0	0	0	0	0		833	6340	6478	6534	6552	6552	6491.2	247	245	249	249	258	249.6	25	26	13	13	12	17.8
834	8434	8514	8085	7953	8651	8327.4	50	66	54	57	58	57	0	0	0	0	0	0		834	6357	6497	6561	6563	6563	6508.2	247	245	249	249	257	249.4	25	26	13	13	12	17.8
835	8462	8548	8109	7984	8693	8359.2	50	69	51	57	57	56.8	0	0	0	0	0	0		835	6368	6508	6579	6579	6579	6522.6	245	243	250	250	257	249	25	26	13	13	12	17.8
836	8495	8578	8132	8008	8732	8389	53	69	51	57	57	57.4	0	0	0	0	0	0		836	6390	6525	6606	6603	6603	6545.4	247	242	251	251	259	250	25	26	13	13	12	17.8
837	8519	8618	8163	8042	8770	8422.4	53	69	50	57	55	56.8	0	0	0	0	0	0		837	6405	6542	6619	6621	6621	6561.6	243	239	251	251	255	247.8	25	26	13	13	12	17.8
838	8553	8643	8204	8070	8803	8454.6	52	68	53	56	55	56.8	0	0	0	0	0	0		838	6441	6564	6639	6644	6644	6586.4	245	238	248	248	257	247.2	25	26	13	13	13	18
839	8585	8677	8239	8102	8833	8487.2	55	68	53	55	55	57.2	0	0	0	0	0	0		839	6462	6588	6658	6661	6661	6606	245	243	249	249	258	248.8	25	26	13	13	13	18
840	8607	8703	8272	8131	8871	8516.8	55	68	54	56	63	59.2	0	0	0	0	0	0		840	6479	6599	6680	6680	6680	6623.6	244	245	252	252	255	249.6	25	26	13	13	13	18
841	8637	8729	8308	8151	8898	8544.6	54	68	54	56	62	58.8	0	0	0	0	0	0		841	6498	6627	6705	6705	6705	6648	245	248	249	249	258	249.8	25	28	13	13	13	18.4
842	8670	8758	8346	8182	8923	8575.8	54	65	54	59	61	58.6	0	0	0	0	0	0		842	6526	6653	6723	6727	6727	6671.2	249	262	248	248	260	253.4	27	28	13	13	13	18.8
843	8706	8800	8377	8214	8958	8611	53	70	56	60	60	59.8	0	0	0	0	0	0		843	6549	6689	6747	6745	6745	6695	260	267	245	245	258	255	28	28	13	13	13	19
844	8733	8832	8408	8249	8998	8644	55	78	56	60	60	61.8	0	0	0	0	0	0		844	6566	6712	6768	6768	6768	6716.4	256	271	243	243	256	253.8	28	28	13	13	13	19
845	8763	8865	8434	8283	9035	8676	54	78	56	58	59	61	0	0	0	0	0	0		845	6585	6738	6801	6784	6784	6738.4	259	276	246	246	256	256.6	28	28	13	13	13	19
846	8792	8895	8464	8326	9065	8708.4	57	80	59	61	58	63	0	0	0	0	0	0		846	6606	6759	6827	6809	6809	6762	261	275	246	246	264	258.4	28	28	13	13	13	19
847	8831	8929	8499	8356	9102	8743.4	60	78	58	60	60	63.2	0	0	0	0	0	0		847	6626	6789	6848	6822	6822	6781.4	263	275	244	244	261	257.4	28	28	13	13	13	19
848	8875	8960	8524	8392	9145	8779.2	65	77	57	60	63	64.4	0	0	0	0	0	0		848	6659	6812	6870	6847	6847	6807	268	282	241	241	260	258.4	28	28	13	13	13	19
849	8915	8989	8547	8434	9180	8813	65	75	56	62	60	63.6	0	0	0	0	0	0		849	6674	6837	6900	6864	6864	6827.8	267	281	238	238	261	257	29	28	13	13	13	19.2
850	8948	9028	8589	8469	9219	8850.6	64	75	59	62	63	64.6	0	0	0	0	0	0		850	6699	6862	6923	6894	6894	6854.4	267	278	236	236	260	255.4	29	28	13	13	13	19.2
851	8984	9051	8624	8500	9258	8883.4	64	74	59	61	63	64.2	0	0	0	0	0	0		851	6725	6878	6955	6914	6914	6877.2	268	279	238	238	262	257	29	30	13	13	13	19.6
852	9023	9083	8660	8539	9291	8919.2	63	72	60	63	66	64.8	0	0	0	0	0	0		852	6747	6897	6976	6927	6927	6894.8	276	278	238	238	264	258.8	29	30	13	13	13	19.6
853	9053	9119	8689	8563	9332	8951.2	61	72	60	63	66	64.4	0	0	0	0	0	0		853	6766	6916	6996	6954	6954	6917.2	278	276	240	240	263	259.4	28	30	13	13	13	19.4
854	9077	9145	8720	8602	9372	8983.2	61	72	62	62	66	64.6	0	0	0	0	0	0		854	6786	6940	7004	6973	6973	6935.2	280	277	237	237	260	258.2	28	30	13	13	13	19.4
855	9109	9173	8758	8634	9418	9018.4	60	71	60	61	66	63.6	0	0	0	0	0	0		855	6811	6968	7035	7007	7007	6965.6	280	274	239	239	260	258.4	28	30	13	13	13	19.4
856	9141	9206	8791	8663	9458	9051.8	62	71	60	66	65	64.8	0	0	0	0	0	0		856	6834	6997	7055	7031	7031	6989.6	285	277	236	236	255	257.8	28	30	13	13	13	19.4
857	9182	9247	8826	8685	9502	9088.4	60	68	59	65	70	64.4	0	0	0	0	0	0		857	6862	7014	7077	7055	7055	7012.6	288	275	233	233	256	257	28	29	13	13	13	19.2
858	9212	9280	8862	8708	9536	9119.6	59	71	59	64	70	64.6	0	0	0	0	0	0		858	6886	7043	7095	7080	7080	7036.8	290	278	232	232	253	257	28	29	13	13	13	19.2
859	9240	9315	8888	8747	9568	9151.6	58	71	58	66	69	64.4	0	0	0	0	0	0		859	6912	7068	7125	7096	7096	7059.4	293	283	230	230	254	258	28	29	13	13	13	19.2
860	9275	9345	8913	8783	9605	9184.2	57	70	57	68	69	64.2	0	0	0	0	0	0		860	6939	7098	7149	7125	7125	7087.2	293	291	230	230	254	259.6	28	29	13	13	15	19.6
861	9301	9378	8960	8809	9639	9217.4	56	69	62	69	67	64.6	0	0	0	0	0	0		861	6965	7121	7166	7143	7143	7107.6	291	291	226	226	251	257	28	33	13	13	15	20.4
862	9327	9404	8993	8838	9677	9247.8	53	68	62	69	65	63.4	0	0	0	0	0	0		862	6983	7152	7187	7166	7166	7130.8	290	291	229	229	256	259	28	33	13	13	15	20.4
863	9366	9440	9035	8874	9711	9285.2	53	71	64	71	64	64.6	0	0	0	0	0	0		863	7004	7177	7206	7199	7199	7157	288	290	237	237	261	262.6	27	33	13	13	15	20.2
864	9402	9474	9070	8908	9760	9322.8	58	71	66	71	63	65.8	0	0	0	0	0	0		864	7032	7202	7226	7231	7231	7184.4	286	291	236	236	264	262.6	27	33	13	13	15	20.2
865	9440	9507	9100	8955	9791	9358.6	57	71	66	69	63	65.2	0	0	0	0	0	0		865	7061	7230	7260	7258	7258	7213.4	289	292	241	241	261	264.8	29	33	13	13	15	20.6
866	9471	9547	9133	8990	9832	9394.6	60	74	65	68	63	66	0	0	0	0	0	0		866	7090	7255	7288	7278	7278	7237.8	295	296	245	245	260	268.2	30	33	13	13	15	20.8
867	9513	9580	9168	9035	9886	9436.4	63	71	65	71	69	67.8	0	0	0	0	0	0		867	7114	7281	7306	7304	7304	7261.8	292	295	247	247	267	269.6	30	33	13	13	15	20.8
868	9551	9615	9212	9066	9925	9473.8	63	71	64	70	68	67.2	0	0	0	0	0	0		868	7133	7313	7325	7330	7330	7286.2	288	299	248	248	267	270	29	32	13	13	15	20.4
869	9587	9650	9252	9096	9965	9510	63	71	63	69	70	67.2	0	0	0	0	0	0		869	7151	7330	7353	7355	7355	7308.8	292	301	251	251	269	272.8	29	32	13	13	15	20.4
870	9615	9690	9289	9122	10000	9543.2	64	70	61	66	70	66.2	0	0	0	0	0	0		870	7175	7357	7391	7389	7389	7340.2	291	302	260	260	270	276.6	29	32	13	13	15	20.4
871	9652	9722	9317	9156	10030	9575.4	67	70	61	66	71	67	0	0	0	0	0	0		871	7206	7379	7414	7399	7399	7359.4	291	302	269	269	268	279.8	29	34	13	13	15	20.8
872	9693	9753	9359	9184	10074	9612.6	67	70	63	65	74	67.8	0	0	0	0	0	0		872	7233	7397	7427	7423	7423	7380.6	289	302	267	267	267	278.4	29	34	13	13	15	20.8
873	9733	9789	9388	9217	10109	9647.2	64	70	65	67	77	68.6	0	0	0	0	0	0		873	7271	7433	7452	7452	7452	7412	293	306	270	270	268	281.4	29	34	13	13	15	20.8
874	9780	9821	9422	9247	10140	9682	67	70	68	72	75	70.4	0	0	0	0	0	0		874	7294	7456	7473	7479	7479	7436.2	290	304	272	272	272	282	29	34	13	13	15	20.8
875	9833	9852	9460	9280	10195	9724	66	69	66	70	77	69.6	0	0	0	0	0	0		875	7312	7470	7493	7493	7493	7452.2	292	300	277	277	271	283.4	30	34	13	13	15	21
876	9866	9888	9512	9316	10230	9762.4	65	69	66	69	75	68.8	0	0	0	0	0	0		876	7339	7497	7507	7515	7515	7474.6	297	299	275	275	275	284.2	30	35	13	13	15	21.2
877	9905	9927	9546	9353	10281	9802.4	65	71	65	68	78	69.4	0	0	0	0	0	0		877	7377	7519	7519	7540	7540	7499	299	304	279	279	274	287	30	35	13	13	15	21.2
878	9935	9956	9589	9396	10315	9838.2	63	71	64	71	80	69.8	0	0	0	0	0	0		878	7391	7544	7546	7565	7565	7522.2	299	301	285	285	274	288.8	31	35	13	13	15	21.4
879	9972	9990	9631	9438	10355	9877.2	62	71	64	71	79	69.4	0	0	0	0	0	0		879	7406	7559	7570	7594	7594	7544.6	291	302	284	284	271	286.4	31	34	15	15	15	22
880	10009	10015	9661	9472	10382	9907.8	60	70	64	71	77	68.4	0	0	0	0	0	0		880	7423	7578	7587	7623	7623	7566.8	294	301	286	286	273	288	31	34	16	16	15	22.4
881	10058	10046	9693	9514	10422	9946.6	59	69	63	73	80	68.8	0	0	0	0	0	0		881	7448	7609	7613	7651	7651	7594.4	300	304	285	285	279	290.6	31	34	16	16	15	22.4
882	10093	10090	9731	9554	10455	9984.6	59	72	62	75	79	69.4	0	0	0	0	0	0		882	7476	7631	7638	7669	7669	7616.6	306	301	285	285	274	290.2	31	34	16	16	15	22.4
883	10134	10129	9770	9587	10490	10022	58	81	61	73	81	70.8	0	0	0	0	0	0		883	7500	7653	7666	7694	7694	7641.4	311	306	286	286	276	293	31	35	16	16	15	22.6
884	10159	10152	9809	9639	10548	10061.4	57	81	67	72	80	71.4	0	0	0	0	0	0		884	7520	7675	7686	7718	7718	7663.4	308	306	281	281	279	291	30	35	16	16	15	22.4
885	10200	10199	9844	9675	10594	10102.4	56	81	69	71	78	71	0	0	0	0	0	0		885	7543	7699	7715	7740	7740	7687.4	307	309	280	280	277	290.6	31	35	16	16	14	22.4
886	10238	10236	9886	9707	10647	10142.8	56	79	67	74	79	71	0	0	0	0	0	0		886	7568	7737	7755	7765	7765	7718	311	322	275	275	277	292	31	35	16	16	14	22.4
887	10276	10279	9930	9740	10680	10181	62	79	75	75	77	73.6	0	0	0	0	0	0		887	7597	7761	7783	7791	7791	7744.6	309	328	275	275	275	292.4	31	35	18	18	14	23.2
888	10319	10321	9971	9783	10720	10222.8	61	79	77	73	83	74.6	0	0	0	0	0	0		888	7624	7779	7812	7819	7819	7770.6	308	329	273	273	283	293.2	31	35	18	18	14	23.2
889	10361	10349	10005	9823	10756	10258.8	61	79	77	73	88	75.6	0	0	0	0	0	0		889	7652	7808	7830	7848	7848	7797.2	306	326	272	272	283	291.8	33	34	18	18	14	23.4
890	10404	10388	10054	9856	10795	10299.4	67	79	80	72	86	76.8	0	0	0	0	0	0		890	7677	7835	7857	7867	7867	7820.6	305	328	272	272	280	291.4	33	34	18	18	14	23.4
891	10438	10417	10098	9895	10836	10336.8	70	77	80	74	88	77.8	0	0	0	0	0	0		891	7703	7864	7883	7893	7893	7847.2	313	325	269	269	280	291.2	33	34	18	18	14	23.4
892	10477	10469	10135	9937	10881	10379.8	70	74	83	73	86	77.2	0	0	0	0	0	0		892	7721	7892	7906	7929	7929	7875.4	311	327	267	267	286	291.6	33	34	18	18	14	23.4
893	10512	10500	10178	9968	10925	10416.6	73	74	84	75	86	78.4	0	0	0	0	0	0		893	7746	7921	7926	7956	7956	7901	315	328	265	265	289	292.4	33	34	18	18	14	23.4
894	10555	10543	10216	10014	10979	10461.4	73	74	83	75	89	78.8	0	0	0	0	0	0		894	7771	7951	7951	7978	7978	7925.8	317	330	264	264	298	294.6	33	34	18	18	14	23.4
895	10596	10580	10258	10055	11004	10498.6	73	74	82	76	86	78.2	0	0	0	0	0	0		895	7800	7984	7975	8006	8006	7954.2	315	330	266	266	298	295	33	34	18	18	14	23.4
896	10637	10623	10294	10087	11044	10537	70	73	79	74	86	76.4	0	0	0	0	0	0		896	7839	7997	7991	8040	8040	7981.4	319	331	263	263	304	296	33	37	18	18	16	24.4
897	10665	10670	10342	10134	11079	10578	70	73	78	76	82	75.8	0	0	0	0	0	0		897	7871	8019	8012	8072	8072	8009.2	319	329	260	260	307	295	32	37	18	18	18	24.6
898	10702	10716	10374	10171	11125	10617.6	69	79	76	75	83	76.4	0	0	0	0	0	0		898	7886	8050	8036	8099	8099	8034	318	337	260	260	312	297.4	32	37	18	18	21	25.2
899	10727	10752	10420	10208	11165	10654.4	70	79	77	75	89	78	0	0	0	0	0	0		899	7920	8074	8059	8131	8131	8063	321	341	262	262	320	301.2	34	37	19	19	21	26
900	10769	10800	10454	10245	11200	10693.6	69	78	77	76	87	77.4	0	0	0	0	0	0		900	7941	8106	8092	8150	8150	8087.8	324	345	261	261	320	302.2	34	38	19	19	21	26.2
901	10813	10834	10489	10270	11242	10729.6	66	78	81	75	87	77.4	0	0	0	0	0	0		901	7958	8133	8126	8176	8176	8113.8	329	345	264	264	321	304.6	34	38	21	21	21	27
902	10849	10867	10533	10305	11280	10766.8	64	81	82	73	85	77	0	0	0	0	0	0		902	7980	8162	8161	8207	8207	8143.4	334	344	264	264	319	305	34	38	21	21	21	27
903	10891	10898	10557	10339	11315	10800	64	81	82	72	81	76	0	0	0	0	0	0		903	8012	8192	8194	8232	8232	8172.4	339	346	264	264	319	306.4	34	38	21	21	21	27
904	10935	10950	10590	10377	11355	10841.4	65	81	87	73	81	77.4	0	0	0	0	0	0		904	8031	8211	8219	8251	8251	8192.6	341	341	263	263	320	305.6	34	38	21	21	21	27
905	10982	10987	10637	10411	11406	10884.6	70	81	86	72	83	78.4	0	0	0	0	0	0		905	8055	8245	8242	8286	8286	8222.8	340	340	264	264	318	305.2	34	38	21	21	21	27
906	11023	11025	10684	10450	11448	10926	70	83	85	71	83	78.4	0	0	0	0	0	0		906	8078	8273	8268	8324	8324	8253.4	341	346	266	266	331	310	34	38	21	21	21	27
907	11059	11070	10712	10485	11491	10963.4	72	81	83	72	85	78.6	0	0	0	0	0	0		907	8102	8304	8298	8351	8351	8281.2	340	348	265	265	331	309.8	34	38	21	21	21	27
908	11098	11104	10750	10525	11526	11000.6	71	83	85	75	82	79.2	0	0	0	0	0	0		908	8135	8333	8330	8374	8374	8309.2	343	345	267	267	331	310.6	34	38	21	21	23	27.4
909	11140	11153	10793	10561	11566	11042.6	71	83	85	73	85	79.4	0	0	0	0	0	0		909	8168	8353	8360	8409	8409	8339.8	344	343	270	270	337	312.8	36	38	21	21	23	27.8
910	11186	11191	10824	10610	11634	11089	71	86	85	73	88	80.6	0	0	0	0	0	0		910	8197	8384	8378	8434	8434	8365.4	347	345	267	267	337	312.6	36	38	21	21	23	27.8
911	11220	11242	10858	10648	11674	11128.4	73	90	84	72	88	81.4	0	0	0	0	0	0		911	8220	8415	8402	8463	8463	8392.6	347	348	271	271	338	315	37	38	22	22	23	28.4
912	11264	11285	10891	10682	11706	11165.6	76	88	84	71	90	81.8	0	0	0	0	0	0		912	8239	8444	8440	8483	8483	8417.8	346	349	278	278	337	317.6	37	38	22	22	23	28.4
913	11306	11329	10937	10729	11739	11208	74	88	84	73	91	82	0	0	0	0	0	0		913	8267	8465	8460	8514	8514	8444	347	346	276	276	341	317.2	37	38	22	22	23	28.4
914	11351	11382	10974	10766	11791	11252.8	74	94	83	72	90	82.6	0	0	0	0	0	0		914	8296	8495	8491	8534	8534	8470	352	349	278	278	341	319.6	37	38	22	22	23	28.4
915	11400	11438	11011	10808	11837	11298.8	76	95	80	71	92	82.8	0	0	0	0	0	0		915	8315	8520	8520	8571	8571	8499.4	353	353	281	281	358	325.2	36	38	22	22	23	28.2
916	11449	11477	11050	10845	11879	11340	78	97	79	70	90	82.8	0	0	0	0	0	0		916	8343	8548	8552	8592	8592	8525.4	357	355	283	283	354	326.4	36	38	22	22	23	28.2
917	11497	11516	11084	10876	11918	11378.2	78	96	77	69	93	82.6	0	0	0	0	0	0		917	8373	8577	8584	8628	8628	8558	361	356	285	285	360	329.4	36	38	22	22	23	28.2
918	11539	11560	11125	10910	11964	11419.6	77	96	75	68	98	82.8	0	0	0	0	0	0		918	8395	8610	8613	8651	8651	8584	354	356	283	283	359	327	36	40	22	22	23	28.6
919	11598	11602	11167	10948	12001	11463.2	81	98	77	68	96	84	0	0	0	0	0	0		919	8418	8645	8641	8676	8676	8611.2	354	360	286	286	360	329.2	36	40	22	22	25	29
920	11642	11645	11209	10991	12050	11507.4	83	98	77	71	96	85	0	0	0	0	0	0		920	8450	8673	8665	8722	8722	8646.4	350	358	290	290	368	331.2	36	40	22	22	25	29
921	11676	11674	11256	11028	12096	11546	81	98	77	70	94	84	0	0	0	0	0	0		921	8484	8706	8697	8754	8754	8679	355	364	294	294	366	334.6	37	40	22	22	25	29.2
922	11729	11710	11296	11070	12138	11588.6	81	96	75	68	92	82.4	0	0	0	0	0	0		922	8522	8725	8723	8778	8778	8705.2	356	366	295	295	365	335.4	37	40	23	23	25	29.6
923	11769	11745	11345	11122	12175	11631.2	80	97	78	71	90	83.2	0	0	0	0	0	0		923	8560	8752	8752	8810	8810	8736.8	358	368	295	295	366	336.4	37	40	23	23	25	29.6
924	11829	11789	11381	11157	12215	11674.2	82	95	77	74	88	83.2	0	0	0	0	0	0		924	8591	8783	8777	8840	8840	8766.2	359	366	297	297	365	336.8	39	40	23	23	25	30
925	11866	11832	11433	11196	12265	11718.4	80	92	86	74	94	85.2	0	0	0	0	0	0		925	8621	8810	8806	8870	8870	8795.4	361	370	297	297	368	338.6	39	40	23	23	25	30
926	11895	11876	11471	11244	12313	11759.8	78	92	85	77	95	85.4	0	0	0	0	0	0		926	8645	8837	8821	8907	8907	8823.4	368	368	299	299	371	341	39	40	23	23	25	30
927	11932	11918	11504	11281	12351	11797.2	78	91	87	76	92	84.8	0	0	0	0	0	0		927	8666	8865	8848	8943	8943	8853	369	368	299	299	370	341	39	40	25	25	25	30.8
928	11982	11965	11545	11325	12390	11841.4	75	91	86	76	92	84	0	0	0	0	0	0		928	8706	8896	8880	8976	8976	8886.8	370	372	303	303	374	344.4	39	40	25	25	25	30.8
929	12028	11999	11591	11358	12435	11882.2	73	89	86	78	91	83.4	0	0	0	0	0	0		929	8738	8923	8913	8997	8997	8913.6	372	373	310	310	370	347	39	39	26	26	26	31.2
930	12068	12044	11632	11398	12480	11924.4	71	88	92	77	91	83.8	0	0	0	0	0	0		930	8767	8947	8948	9021	9021	8940.8	377	377	308	308	366	347.2	39	39	26	26	26	31.2
931	12114	12091	11676	11436	12525	11968.4	71	91	95	77	93	85.4	0	0	0	0	0	0		931	8793	8979	8970	9062	9062	8973.2	374	382	307	307	366	347.2	39	39	26	26	26	31.2
932	12162	12136	11732	11481	12570	12016.2	69	93	97	74	94	85.4	0	0	0	0	0	0		932	8821	9022	9000	9089	9089	9004.2	373	383	307	307	365	347	39	39	26	26	26	31.2
933	12208	12195	11782	11518	12612	12063	66	92	96	76	96	85.2	0	0	0	0	0	0		933	8842	9054	9024	9115	9115	9030	375	386	309	309	366	349	39	39	26	26	26	31.2
934	12252	12250	11822	11563	12648	12107	67	90	92	75	97	84.2	0	0	0	0	0	0		934	8877	9081	9060	9155	9155	9065.6	377	385	316	316	367	352.2	39	39	26	26	26	31.2
935	12314	12288	11862	11606	12685	12151	67	93	95	73	96	84.8	0	0	0	0	0	0		935	8906	9109	9086	9190	9190	9096.2	381	390	317	317	368	354.6	39	39	26	26	26	31.2
936	12368	12331	11907	11641	12720	12193.4	67	102	96	73	96	86.8	0	0	0	0	0	0		936	8929	9144	9116	9212	9212	9122.6	382	392	321	321	366	356.4	39	41	26	26	26	31.6
937	12410	12386	11949	11670	12768	12236.6	70	101	95	75	96	87.4	0	0	0	0	0	0		937	8945	9176	9151	9242	9242	9151.2	377	393	323	323	362	355.6	40	41	26	26	26	31.8
938	12459	12427	11994	11707	12826	12282.6	72	104	95	76	96	88.6	0	0	0	0	0	0		938	8981	9211	9185	9282	9282	9188.2	382	394	323	323	363	357	40	41	26	26	26	31.8
939	12516	12472	12038	11747	12865	12327.6	72	104	90	76	99	88.2	0	0	0	0	0	0		939	9009	9252	9212	9312	9312	9219.4	382	398	322	322	367	358.2	40	42	27	27	25	32.2
940	12561	12522	12079	11793	12893	12369.6	75	103	88	75	100	88.2	0	0	0	0	0	0		940	9039	9286	9239	9346	9346	9251.2	388	402	324	324	366	360.8	41	42	27	27	25	32.4
941	12609	12567	12116	11850	12943	12417	78	105	86	75	105	89.8	0	0	0	0	0	0		941	9068	9320	9277	9385	9385	9287	385	406	326	326	368	362.2	41	41	27	27	26	32.4
942	12644	12605	12168	11893	12983	12458.6	78	103	86	74	103	88.8	0	0	0	0	0	0		942	9109	9339	9313	9406	9406	9314.6	383	406	326	326	364	361	41	40	27	27	27	32.4
943	12677	12646	12209	11941	13031	12500.8	77	103	89	73	102	88.8	0	0	0	0	0	0		943	9137	9366	9354	9432	9432	9344.2	380	411	329	329	367	363.2	41	40	27	27	27	32.4
944	12735	12696	12248	11986	13087	12550.4	83	108	92	76	105	92.8	0	0	0	0	0	0		944	9157	9394	9383	9461	9461	9371.2	380	414	328	328	365	363	41	41	27	27	27	32.6
945	12778	12730	12289	12030	13137	12592.8	81	103	90	76	109	91.8	0	0	0	0	0	0		945	9180	9420	9416	9512	9512	9408	375	411	331	331	380	365.6	41	41	27	27	27	32.6
946	12823	12776	12332	12075	13184	12638	80	104	89	75	108	91.2	0	0	0	0	0	0		946	9208	9449	9442	9541	9541	9436.2	372	420	329	329	379	365.8	41	41	27	27	27	32.6
947	12868	12832	12369	12133	13224	12685.2	85	102	89	73	107	91.2	0	0	0	0	0	0		947	9232	9483	9477	9582	9582	9471.2	372	417	337	337	386	369.8	41	41	29	29	27	33.4
948	12910	12882	12419	12184	13268	12732.6	84	102	89	79	104	91.6	0	0	0	0	0	0		948	9256	9512	9501	9611	9611	9498.2	376	417	338	338	387	371.2	43	41	29	29	27	33.8
949	12952	12931	12460	12225	13328	12779.2	83	101	88	82	103	91.4	0	0	0	0	0	0		949	9290	9546	9538	9637	9637	9529.6	387	415	339	339	385	373	43	41	29	29	26	33.6
950	13008	12979	12496	12253	13378	12822.8	82	100	87	82	100	90.2	0	0	0	0	0	0		950	9316	9586	9564	9684	9684	9566.8	389	416	345	345	385	376	46	41	29	29	26	34.2
951	13057	13027	12557	12293	13435	12873.8	84	102	93	80	103	92.4	0	0	0	0	0	0		951	9339	9620	9594	9722	9722	9599.4	388	418	347	347	383	376.6	46	41	29	29	26	34.2
952	13098	13086	12595	12344	13477	12920	82	110	92	85	105	94.8	0	0	0	0	0	0		952	9375	9654	9618	9760	9760	9633.4	392	418	354	354	383	380.2	46	41	29	29	26	34.2
953	13144	13125	12640	12381	13542	12966.4	83	108	90	84	108	94.6	0	0	0	0	0	0		953	9408	9682	9650	9781	9781	9660.4	391	416	358	358	381	380.8	46	41	29	29	26	34.2
954	13186	13167	12677	12432	13583	13009	88	107	90	84	111	96	0	0	0	0	0	0		954	9448	9711	9678	9812	9812	9692.2	391	412	355	355	380	378.6	46	40	29	29	26	34
955	13238	13217	12721	12469	13637	13056.4	89	111	93	84	112	97.8	0	0	0	0	0	0		955	9470	9744	9705	9832	9832	9716.6	393	417	356	356	377	379.8	46	40	29	29	26	34
956	13276	13282	12768	12508	13689	13104.6	87	117	93	87	111	99	0	0	0	0	0	0		956	9497	9772	9732	9851	9851	9740.6	397	415	355	355	378	380	46	40	29	29	26	34
957	13331	13344	12807	12549	13734	13153	95	120	94	88	114	102.2	0	0	0	0	0	0		957	9535	9803	9762	9883	9883	9773.2	403	414	360	360	378	383	46	40	32	32	26	35.2
958	13378	13379	12844	12585	13784	13194	93	116	92	85	113	99.8	0	0	0	0	0	0		958	9564	9832	9792	9902	9902	9798.4	404	418	365	365	371	384.6	47	40	32	32	25	35.2
959	13424	13427	12889	12636	13834	13242	93	115	92	85	111	99.2	0	0	0	0	0	0		959	9582	9862	9815	9934	9934	9825.4	402	420	359	359	367	381.4	47	40	32	32	25	35.2
960	13475	13479	12921	12687	13885	13289.4	91	113	90	85	113	98.4	0	0	0	0	0	0		960	9609	9899	9851	9966	9966	9858.2	407	426	361	361	369	384.8	47	41	32	32	25	35.4
961	13544	13531	12978	12729	13937	13343.8	92	113	93	83	115	99.2	0	0	0	0	0	0		961	9644	9920	9869	10009	10009	9890.2	415	427	355	355	374	385.2	48	41	32	32	25	35.6
962	13587	13580	13019	12772	13979	13387.4	91	113	93	81	113	98.2	0	0	0	0	0	0		962	9671	9955	9897	10046	10046	9923	414	431	356	356	377	386.8	48	41	32	32	26	35.8
963	13641	13632	13063	12815	14035	13437.2	89	113	93	80	111	97.2	0	0	0	0	0	0		963	9694	9982	9920	10072	10072	9948	413	429	360	360	378	388	48	41	32	32	26	35.8
964	13698	13692	13115	12875	14083	13492.6	91	112	92	83	110	97.6	0	0	0	0	0	0		964	9724	10006	9958	10107	10107	9980.4	413	428	363	363	375	388.4	47	41	32	32	26	35.6
965	13748	13742	13177	12913	14122	13540.4	93	108	93	88	114	99.2	0	0	0	0	0	0		965	9766	10036	9988	10138	10138	10013.2	419	426	361	361	377	388.8	49	41	32	32	26	36
966	13795	13808	13220	12959	14165	13589.4	90	104	92	85	112	96.6	0	0	0	0	0	0		966	9803	10067	10023	10192	10192	10055.4	424	429	366	366	385	394	49	42	32	32	26	36.2
967	13849	13864	13260	12998	14225	13639.2	92	107	90	85	110	96.8	0	0	0	0	0	0		967	9833	10098	10057	10222	10222	10086.4	422	428	373	373	384	396	49	42	32	32	26	36.2
968	13898	13911	13312	13039	14277	13687.4	90	110	90	87	111	97.6	0	0	0	0	0	0		968	9864	10137	10097	10260	10260	10123.6	427	429	372	372	383	396.6	49	42	32	32	26	36.2
969	13952	13964	13374	13075	14333	13739.6	89	107	92	87	109	96.8	0	0	0	0	0	0		969	9901	10171	10144	10290	10290	10159.2	423	433	376	376	380	397.6	49	43	32	32	27	36.6
970	13998	14006	13419	13112	14387	13784.4	91	102	91	86	111	96.2	0	0	0	0	0	0		970	9933	10210	10177	10332	10332	10196.8	425	431	379	379	381	399	48	45	33	33	27	37.2
971	14037	14064	13465	13161	14438	13833	86	101	90	88	113	95.6	0	0	0	0	0	0		971	9972	10231	10221	10373	10373	10234	427	432	392	392	389	406.4	48	45	33	33	27	37.2
972	14096	14109	13513	13224	14495	13887.4	89	101	89	88	119	97.2	0	0	0	0	0	0		972	9992	10261	10248	10406	10406	10262.6	425	431	394	394	387	406.2	47	45	33	33	27	37
973	14149	14153	13582	13267	14551	13940.4	88	103	92	86	119	97.6	0	0	0	0	0	0		973	10031	10294	10289	10446	10446	10301.2	426	427	392	392	396	406.6	47	45	33	33	27	37
974	14203	14207	13625	13312	14595	13988.4	87	108	91	84	116	97.2	0	0	0	0	0	0		974	10062	10332	10315	10475	10475	10331.8	426	439	393	393	397	409.6	47	45	33	33	27	37
975	14258	14252	13670	13347	14648	14035	86	107	92	84	115	96.8	0	0	0	0	0	0		975	10093	10358	10357	10504	10504	10363.2	431	440	395	395	398	411.8	48	45	33	33	27	37.2
976	14308	14310	13718	13394	14706	14087.2	85	106	98	86	114	97.8	0	0	0	0	0	0		976	10123	10403	10385	10529	10529	10393.8	432	437	394	394	405	412.4	48	45	33	33	29	37.6
977	14349	14366	13766	13451	14758	14138	88	109	98	85	116	99.2	0	0	0	0	0	0		977	10159	10430	10412	10563	10563	10425.4	428	434	397	397	404	412	48	45	33	33	30	37.8
978	14402	14418	13818	13499	14798	14187	87	110	99	90	116	100.4	0	0	0	0	0	0		978	10187	10469	10444	10600	10600	10460	425	437	398	398	399	411.4	48	45	33	33	30	37.8
979	14449	14492	13854	13548	14849	14238.4	85	113	98	91	113	100	0	0	0	0	0	0		979	10226	10499	10488	10641	10641	10499	437	437	407	407	400	417.6	48	46	33	33	30	38
980	14501	14544	13899	13602	14886	14286.4	85	112	98	93	112	100	0	0	0	0	0	0		980	10251	10535	10526	10682	10682	10535.2	436	438	410	410	399	418.6	50	46	35	35	30	39.2
981	14549	14597	13942	13655	14939	14336.4	83	114	97	93	110	99.4	0	0	0	0	0	0		981	10273	10573	10553	10713	10713	10565	437	445	410	410	409	422.2	50	46	35	35	30	39.2
982	14598	14643	13985	13721	14994	14388.2	82	111	96	92	111	98.4	0	0	0	0	0	0		982	10303	10601	10590	10751	10751	10599.2	438	442	418	418	408	424.8	50	46	35	35	32	39.6
983	14644	14696	14038	13776	15049	14440.6	82	108	101	92	114	99.4	0	0	0	0	0	0		983	10332	10634	10622	10786	10786	10632	439	438	417	417	410	424.2	50	46	35	35	32	39.6
984	14710	14763	14090	13822	15102	14497.4	87	108	103	95	113	101.2	0	0	0	0	0	0		984	10371	10670	10658	10822	10822	10668.6	444	441	421	421	416	428.6	50	46	36	36	32	40
985	14760	14815	14137	13866	15164	14548.4	89	108	104	93	112	101.2	0	0	0	0	0	0		985	10408	10693	10692	10860	10860	10702.6	439	443	418	418	425	428.6	50	46	36	36	32	40
986	14803	14870	14185	13919	15217	14598.8	86	106	107	96	112	101.4	0	0	0	0	0	0		986	10435	10717	10727	10882	10882	10728.6	443	446	418	418	424	429.8	50	48	38	38	32	41.2
987	14856	14926	14231	13956	15275	14648.8	88	104	111	95	115	102.6	0	0	0	0	0	0		987	10462	10760	10757	10922	10922	10764.6	440	455	419	419	430	432.6	50	48	37	37	32	40.8
988	14913	14989	14280	13999	15331	14702.4	91	100	111	94	118	102.8	0	0	0	0	0	0		988	10492	10797	10799	10951	10951	10798	440	459	429	429	433	438	50	49	37	37	32	41
989	14968	15048	14327	14043	15388	14754.8	93	100	110	91	117	102.2	0	0	0	0	0	0		989	10519	10830	10842	10996	10996	10836.6	439	456	436	436	438	441	50	49	38	38	31	41.2
990	15014	15095	14383	14085	15430	14801.4	93	98	108	90	117	101.2	0	0	0	0	0	0		990	10543	10857	10872	11028	11028	10865.6	436	457	441	441	438	442.6	50	47	38	38	32	41
991	15059	15166	14436	14133	15496	14858	95	96	114	93	118	103.2	0	0	0	0	0	0		991	10576	10895	10920	11061	11061	10902.6	439	453	449	449	434	444.8	50	47	38	38	32	41
992	15113	15213	14474	14179	15547	14905.2	100	95	114	94	120	104.6	0	0	0	0	0	0		992	10618	10933	10967	11105	11105	10945.6	439	459	454	454	433	447.8	49	47	37	37	32	40.4
993	15173	15269	14547	14221	15610	14964	101	94	113	95	123	105.2	0	0	0	0	0	0		993	10645	10952	10988	11132	11132	10969.8	432	458	450	450	431	444.2	49	48	37	37	31	40.4
994	15214	15332	14605	14275	15667	15018.6	102	94	112	94	123	105	0	0	0	0	0	0		994	10681	10989	11016	11173	11173	11006.4	437	456	446	446	435	444	49	48	37	37	31	40.4
995	15266	15396	14658	14329	15725	15074.8	100	92	114	93	125	104.8	0	0	0	0	0	0		995	10710	11027	11054	11218	11218	11045.4	437	457	445	445	438	444.4	49	48	37	37	31	40.4
996	15323	15451	14718	14381	15780	15130.6	102	92	115	98	126	106.6	0	0	0	0	0	0		996	10738	11056	11091	11246	11246	11075.4	441	458	446	446	436	445.4	49	48	37	37	31	40.4
997	15386	15511	14761	14444	15854	15191.2	104	91	116	107	133	110.2	0	0	0	0	0	0		997	10769	11092	11129	11283	11283	11111.2	438	466	448	448	438	447.6	48	48	37	37	31	40.2
998	15441	15570	14815	14504	15911	15248.2	103	94	114	106	139	111.2	0	0	0	0	0	0		998	10796	11145	11181	11315	11315	11150.4	439	471	447	447	442	449.2	48	48	37	37	33	40.6
999	15506	15629	14855	14557	15977	15304.8	111	100	113	106	139	113.8	0	0	0	0	0	0		999	10837	11180	11220	11339	11339	11183	437	467	451	451	439	449	48	48	37	37	33	40.6
1000	15565	15680	14892	14617	16049	15360.6	113	100	110	103	140	113.2	0	0	0	0	0	0		1000	10885	11206	11262	11390	11390	11226.6	437	463	448	448	440	447.2	48	47	37	37	33	40.4
1001	15631	15724	14945	14673	16114	15417.4	110	100	107	101	138	111.2	0	0	0	0	0	0		1001	10933	11249	11310	11423	11423	11267.6	437	468	454	454	445	451.6	48	49	37	37	35	41.2
1002	15674	15775	15008	14736	16164	15471.4	108	103	110	100	135	111.2	0	0	0	0	0	0		1002	10968	11290	11354	11463	11463	11307.6	440	467	458	458	450	454.6	50	49	36	36	35	41.2
1003	15735	15847	15068	14788	16210	15529.6	109	106	110	100	135	112	0	0	0	0	0	0		1003	11001	11327	11406	11501	11501	11347.2	443	468	469	469	455	460.8	50	49	36	36	35	41.2
1004	15799	15900	15120	14844	16270	15586.6	112	109	109	103	137	114	0	0	0	0	0	0		1004	11031	11359	11446	11535	11535	11381.2	439	470	465	465	455	458.8	50	49	36	36	35	41.2
1005	15861	15979	15177	14893	16338	15649.6	119	115	108	99	135	115.2	0	0	0	0	0	0		1005	11060	11413	11484	11558	11558	11414.6	438	478	465	465	454	460	50	48	36	36	35	41
1006	15921	16044	15232	14952	16403	15710.4	125	115	112	95	134	116.2	0	0	0	0	0	0		1006	11103	11451	11533	11600	11600	11457.4	440	480	472	472	468	466.4	50	48	38	38	35	41.8
1007	15975	16106	15294	15000	16461	15767.2	128	123	115	94	131	118.2	0	0	0	0	0	0		1007	11141	11490	11572	11636	11636	11495	440	480	474	474	465	466.6	52	48	38	38	36	42.4
1008	16029	16183	15360	15045	16530	15829.4	124	120	115	94	134	117.4	0	0	0	0	0	0		1008	11173	11520	11594	11691	11691	11533.8	440	478	470	470	469	465.4	52	49	38	38	36	42.6
1009	16089	16248	15416	15098	16590	15888.2	126	119	114	94	132	117	0	0	0	0	0	0		1009	11217	11558	11621	11715	11715	11565.2	438	481	468	468	467	464.4	52	49	38	38	36	42.6
1010	16134	16297	15494	15137	16664	15945.2	125	117	116	92	137	117.4	0	0	0	0	0	0		1010	11269	11593	11681	11737	11737	11603.4	447	480	472	472	466	467.4	52	49	38	38	36	42.6
1011	16198	16352	15558	15191	16726	16005	124	119	117	89	140	117.8	0	0	0	0	0	0		1011	11310	11626	11723	11773	11773	11641	456	483	478	478	473	473.6	53	49	38	38	36	42.8
1012	16262	16422	15619	15238	16786	16065.4	124	120	119	88	141	118.4	0	0	0	0	0	0		1012	11340	11666	11770	11818	11818	11682.4	458	484	476	476	473	473.4	54	49	38	38	35	42.8
1013	16316	16481	15664	15304	16858	16124.6	120	120	118	95	142	119	0	0	0	0	0	0		1013	11371	11706	11805	11857	11857	11719.2	457	484	475	475	472	472.6	54	49	38	38	35	42.8
1014	16380	16536	15724	15382	16928	16190	119	117	117	98	140	118.2	0	0	0	0	0	0		1014	11413	11744	11856	11893	11893	11759.8	453	485	489	489	476	478.4	54	49	38	38	36	43
1015	16446	16592	15784	15434	17004	16252	116	120	115	98	142	118.2	0	0	0	0	0	0		1015	11454	11777	11895	11929	11929	11796.8	460	481	489	489	486	481	53	49	38	38	36	42.8
1016	16507	16627	15845	15489	17090	16311.6	117	114	112	98	145	117.2	0	0	0	0	0	0		1016	11497	11828	11942	11961	11961	11837.8	465	487	506	506	484	489.6	54	51	38	38	36	43.4
1017	16569	16691	15906	15553	17160	16375.8	116	116	118	104	143	119.4	0	0	0	0	0	0		1017	11542	11861	11982	12000	12000	11877	466	487	502	502	484	488.2	54	52	39	39	36	44
1018	16629	16751	15972	15618	17227	16439.4	114	118	118	102	148	120	0	0	0	0	0	0		1018	11570	11901	12014	12044	12044	11914.6	466	490	505	505	495	492.2	54	52	39	39	36	44
1019	16695	16817	16031	15673	17288	16500.8	111	116	115	104	149	119	0	0	0	0	0	0		1019	11612	11942	12054	12090	12090	11957.6	472	492	510	510	496	496	54	52	39	39	36	44
1020	16754	16886	16093	15739	17356	16565.6	108	118	111	106	149	118.4	0	0	0	0	0	0		1020	11668	11976	12085	12132	12132	11998.6	476	488	506	506	506	496.4	54	52	39	39	36	44
1021	16818	16952	16161	15800	17429	16632	111	117	109	108	160	121	0	0	0	0	0	0		1021	11713	12012	12131	12162	12162	12036	480	490	505	505	505	497	54	56	38	38	36	44.4
1022	16876	17013	16237	15844	17494	16692.8	117	119	109	108	164	123.4	0	0	0	0	0	0		1022	11757	12059	12175	12201	12201	12078.6	486	498	508	508	509	501.8	54	56	38	38	36	44.4
1023	16936	17087	16296	15922	17564	16761	115	119	112	113	165	124.8	0	0	0	0	0	0		1023	11800	12094	12214	12246	12246	12120	489	494	512	512	516	504.6	54	56	38	38	36	44.4
1024	17006	17141	16361	15993	17630	16826.2	121	117	111	113	162	124.8	0	0	0	0	0	0		1024	11842	12136	12250	12295	12295	12163.6	494	498	511	511	520	506.8	54	56	38	38	36	44.4
1025	17065	17216	16419	16063	17706	16893.8	125	115	110	112	162	124.8	0	0	0	0	0	0		1025	11877	12189	12303	12344	12344	12211.4	491	496	508	508	520	504.6	53	57	38	38	36	44.4
1026	17135	17284	16470	16120	17768	16955.4	126	113	107	109	164	123.8	0	0	0	0	0	0		1026	11921	12237	12339	12378	12378	12250.6	498	494	512	512	523	507.8	53	57	38	38	36	44.4
1027	17193	17347	16523	16179	17857	17019.8	126	120	106	106	162	124	0	0	0	0	0	0		1027	11946	12277	12374	12403	12403	12280.6	502	493	517	517	520	509.8	53	57	38	38	36	44.4
1028	17260	17415	16606	16251	17923	17091	125	123	109	113	164	126.8	0	0	0	0	0	0		1028	11985	12322	12409	12443	12443	12320.4	502	498	517	517	519	510.6	53	58	38	38	36	44.6
1029	17320	17478	16663	16314	17989	17152.8	128	123	109	115	162	127.4	0	0	0	0	0	0		1029	12019	12356	12459	12481	12481	12359.2	503	494	521	521	525	512.8	53	58	38	38	35	44.4
1030	17379	17534	16725	16385	18060	17216.6	125	122	109	117	156	125.8	0	0	0	0	0	0		1030	12066	12396	12501	12509	12509	12396.2	504	494	525	525	527	515	53	60	38	38	35	44.8
1031	17436	17593	16786	16447	18121	17276.6	126	129	110	120	155	128	0	0	0	0	0	0		1031	12121	12439	12534	12539	12539	12434.4	507	496	525	525	525	515.6	55	60	38	38	35	45.2
1032	17494	17666	16848	16506	18191	17341	126	134	111	121	161	130.6	0	0	0	0	0	0		1032	12160	12476	12578	12583	12583	12476	513	494	528	528	526	517.8	56	60	38	38	36	45.6
1033	17562	17743	16894	16563	18255	17403.4	124	140	111	123	163	132.2	0	0	0	0	0	0		1033	12211	12508	12620	12627	12627	12518.6	516	490	541	541	528	523.2	56	60	38	38	36	45.6
1034	17633	17795	16970	16629	18336	17472.6	133	142	113	122	164	134.8	0	0	0	0	0	0		1034	12255	12550	12657	12659	12659	12556	517	494	547	547	529	526.8	57	60	38	38	36	45.8
1035	17684	17854	17039	16697	18397	17534.2	130	141	112	124	164	134.2	0	0	0	0	0	0		1035	12299	12596	12711	12699	12699	12600.8	524	500	555	555	528	532.4	57	62	38	38	36	46.2
1036	17751	17914	17105	16755	18483	17601.6	128	137	111	126	164	133.2	0	0	0	0	0	0		1036	12335	12643	12757	12749	12749	12646.6	522	504	561	561	532	536	57	62	38	38	36	46.2
1037	17815	17986	17175	16821	18543	17668	131	136	109	121	160	131.4	0	0	0	0	0	0		1037	12375	12695	12807	12796	12796	12693.8	532	500	563	563	542	540	57	61	39	39	36	46.4
1038	17884	18051	17239	16893	18611	17735.6	134	134	109	123	166	133.2	0	0	0	0	0	0		1038	12415	12750	12848	12853	12853	12743.8	538	512	560	560	544	542.8	57	61	39	39	36	46.4
1039	17960	18111	17320	16969	18678	17807.6	132	137	108	125	165	133.4	0	0	0	0	0	0		1039	12458	12799	12906	12891	12891	12789	537	514	565	565	543	544.8	57	61	39	39	36	46.4
1040	18022	18187	17392	17051	18747	17879.8	130	137	110	129	166	134.4	0	0	0	0	0	0		1040	12505	12847	12941	12954	12954	12840.2	533	509	568	568	551	545.8	57	61	38	38	36	46
1041	18101	18255	17455	17114	18841	17953.2	133	134	109	131	165	134.4	0	0	0	0	0	0		1041	12547	12897	12987	12992	12992	12883	533	517	570	570	551	548.2	57	61	38	38	36	46
1042	18166	18317	17527	17181	18912	18020.6	133	134	108	133	163	134.2	0	0	0	0	0	0		1042	12580	12941	13041	13037	13037	12927.2	531	516	573	573	555	549.6	57	61	38	38	36	46
1043	18226	18381	17602	17246	18993	18089.6	128	132	110	132	161	132.6	0	0	0	0	0	0		1043	12622	12985	13092	13069	13069	12967.4	538	514	579	579	554	552.8	58	61	38	38	36	46.2
1044	18310	18453	17679	17318	19088	18169.6	131	134	113	130	165	134.6	0	0	0	0	0	0		1044	12678	13026	13137	13117	13117	13015	540	511	576	576	553	551.2	58	61	38	38	36	46.2
1045	18407	18512	17748	17382	19163	18242.4	135	131	112	130	162	134	0	0	0	0	0	0		1045	12716	13065	13175	13151	13151	13051.6	540	510	571	571	553	549	58	62	38	38	36	46.4
1046	18474	18561	17821	17452	19226	18306.8	143	129	110	129	161	134.4	0	0	0	0	0	0		1046	12749	13112	13211	13189	13189	13090	541	511	566	566	553	547.4	58	62	38	38	38	46.8
1047	18541	18634	17894	17500	19284	18370.6	141	130	110	126	158	133	0	0	0	0	0	0		1047	12785	13144	13248	13238	13238	13130.6	542	515	567	567	555	549.2	58	62	39	39	39	47.4
1048	18620	18707	17967	17583	19347	18444.8	137	134	109	127	157	132.8	0	0	0	0	0	0		1048	12836	13189	13280	13296	13296	13179.4	549	513	564	564	560	550	60	62	39	39	42	48.4
1049	18677	18792	18042	17642	19429	18516.4	136	136	111	124	154	132.2	0	0	0	0	0	0		1049	12882	13234	13318	13343	13343	13224	548	512	561	561	567	549.8	60	62	39	39	42	48.4
1050	18756	18860	18120	17713	19510	18591.8	135	135	114	122	155	132.2	0	0	0	0	0	0		1050	12934	13269	13384	13385	13385	13271.4	553	516	566	566	566	553.4	60	62	39	39	42	48.4
1051	18846	18921	18184	17778	19577	18661.2	143	134	114	120	158	133.8	0	0	0	0	0	0		1051	12980	13310	13428	13430	13430	13315.6	554	519	569	569	560	554.2	60	64	38	38	42	48.4
1052	18911	19001	18272	17843	19661	18737.6	144	134	116	122	159	135	0	0	0	0	0	0		1052	13024	13363	13461	13478	13478	13360.8	554	526	574	574	564	558.4	60	64	38	38	42	48.4
1053	18992	19059	18328	17924	19747	18810	145	132	115	121	157	134	0	0	0	0	0	0		1053	13075	13394	13513	13533	13533	13409.6	553	528	574	574	563	558.4	60	64	38	38	44	48.8
1054	19056	19134	18408	17993	19815	18881.2	143	131	114	118	159	133	0	0	0	0	0	0		1054	13116	13438	13543	13584	13584	13453	551	525	565	565	568	554.8	60	64	38	38	44	48.8
1055	19119	19214	18485	18062	19891	18954.2	139	129	117	116	163	132.8	0	0	0	0	0	0		1055	13154	13495	13589	13622	13622	13496.4	556	527	565	565	578	558.2	60	64	38	38	44	48.8
1056	19198	19285	18565	18128	19961	19027.4	142	127	119	114	163	133	0	0	0	0	0	0		1056	13194	13544	13619	13659	13659	13535	559	537	562	562	575	559	60	64	39	39	44	49.2
1057	19270	19346	18636	18198	20062	19102.4	142	124	117	112	163	131.6	0	0	0	0	0	0		1057	13239	13593	13659	13716	13716	13584.6	557	541	562	562	574	559.2	59	64	39	39	44	49
1058	19340	19406	18698	18274	20114	19166.4	144	122	114	121	161	132.4	0	0	0	0	0	0		1058	13290	13638	13721	13759	13759	13633.4	565	546	569	569	573	564.4	63	64	39	39	44	49.8
1059	19415	19478	18765	18338	20195	19238.2	151	121	112	123	169	135.2	0	0	0	0	0	0		1059	13331	13681	13754	13802	13802	13674	565	543	562	562	572	560.8	65	64	39	39	44	50.2
1060	19487	19554	18827	18398	20288	19310.8	145	121	111	123	169	133.8	0	0	0	0	0	0		1060	13385	13732	13806	13859	13859	13728.2	565	543	570	570	573	564.2	65	64	41	41	44	51
1061	19563	19612	18905	18473	20354	19381.4	144	122	113	122	170	134.2	0	0	0	0	0	0		1061	13436	13791	13856	13893	13893	13773.8	567	559	574	574	572	569.2	66	67	41	41	44	51.8
1062	19655	19712	18983	18551	20428	19465.8	152	123	112	120	169	135.2	0	0	0	0	0	0		1062	13487	13844	13915	13926	13926	13819.6	570	568	582	582	570	574.4	66	67	41	41	44	51.8
1063	19732	19779	19044	18631	20510	19539.2	155	121	109	122	168	135	0	0	0	0	0	0		1063	13528	13896	13959	13966	13966	13863	579	567	591	591	573	580.2	67	67	42	42	44	52.4
1064	19795	19855	19136	18704	20581	19614.2	157	124	110	122	164	135.4	0	0	0	0	0	0		1064	13562	13931	14015	14006	14006	13904	581	572	586	586	569	578.8	67	67	42	42	44	52.4
1065	19864	19942	19196	18780	20665	19689.4	158	124	109	126	166	136.6	0	0	0	0	0	0		1065	13599	13981	14059	14059	14059	13951.4	580	574	593	593	572	582.4	67	67	42	42	44	52.4
1066	19937	19997	19257	18852	20738	19756.2	157	124	106	125	165	135.4	0	0	0	0	0	0		1066	13638	14029	14110	14097	14097	13994.2	578	579	597	597	566	583.4	67	67	42	42	46	52.8
1067	20001	20073	19340	18910	20819	19828.6	155	126	106	125	164	135.2	0	0	0	0	0	0		1067	13689	14074	14163	14148	14148	14044.4	580	581	598	598	571	585.6	69	67	42	42	46	53.2
1068	20068	20156	19405	18988	20892	19901.8	151	132	106	123	162	134.8	0	0	0	0	0	0		1068	13738	14119	14222	14188	14188	14091	586	580	606	606	569	589.4	70	67	42	42	46	53.4
1069	20143	20227	19479	19061	20954	19972.8	153	132	104	122	159	134	0	0	0	0	0	0		1069	13788	14163	14264	14240	14240	14139	588	587	612	612	576	595	70	67	41	41	46	53
1070	20241	20296	19552	19125	21047	20052.2	155	130	102	127	167	136.2	0	0	0	0	0	0		1070	13817	14216	14318	14321	14321	14198.6	586	599	614	614	587	600	73	71	41	41	46	54.4
1071	20327	20369	19611	19204	21119	20126	152	132	102	128	166	136	0	0	0	0	0	0		1071	13862	14261	14369	14360	14360	14242.4	587	603	615	615	591	602.2	73	73	43	43	47	55.8
1072	20393	20446	19698	19270	21197	20200.8	155	137	105	130	166	138.6	0	0	0	0	0	0		1072	13917	14316	14431	14412	14412	14297.6	588	606	623	623	589	605.8	73	73	43	43	47	55.8
1073	20465	20541	19772	19338	21274	20278	154	139	104	129	166	138.4	0	0	0	0	0	0		1073	13970	14353	14486	14472	14472	14350.6	593	608	632	632	599	612.8	73	73	43	43	47	55.8
1074	20529	20614	19846	19408	21355	20350.4	151	138	125	126	163	140.6	0	0	0	0	0	0		1074	14017	14385	14530	14506	14506	14388.8	590	606	631	631	605	612.6	75	73	43	43	47	56.2
1075	20603	20691	19921	19495	21421	20426.2	150	136	130	126	162	140.8	0	0	0	0	0	0		1075	14059	14453	14579	14550	14550	14438.2	598	621	632	632	602	617	75	73	43	43	47	56.2
1076	20669	20767	19990	19574	21493	20498.6	156	137	130	131	162	143.2	0	0	0	0	0	0		1076	14109	14505	14614	14606	14606	14488	601	626	630	630	602	617.8	75	73	43	43	49	56.6
1077	20746	20844	20065	19645	21577	20575.4	157	137	133	130	164	144.2	0	0	0	0	0	0		1077	14154	14560	14674	14666	14666	14544	609	626	634	634	608	622.2	76	74	43	43	49	57
1078	20818	20928	20128	19711	21654	20647.8	155	136	135	133	170	145.8	0	0	0	0	0	0		1078	14217	14605	14721	14717	14717	14595.4	611	619	637	637	608	622.4	76	74	43	43	49	57
1079	20906	20997	20200	19783	21731	20723.4	152	138	135	129	166	144	0	0	0	0	0	0		1079	14262	14654	14755	14778	14778	14645.4	611	619	635	635	618	623.6	77	74	43	43	49	57.2
1080	20973	21062	20273	19840	21815	20792.6	152	137	138	128	166	144.2	0	0	0	0	0	0		1080	14315	14701	14803	14831	14831	14696.2	614	620	634	634	621	624.6	76	76	43	43	49	57.4
1081	21066	21142	20345	19922	21895	20874	153	137	136	127	166	143.8	0	0	0	0	0	0		1081	14371	14743	14842	14873	14873	14740.4	617	627	633	633	618	625.6	76	76	43	43	49	57.4
1082	21129	21216	20428	19993	21978	20948.8	152	140	134	130	163	143.8	0	0	0	0	0	0		1082	14418	14800	14890	14925	14925	14791.6	619	636	633	633	622	628.6	76	76	43	43	49	57.4
1083	21227	21304	20489	20064	22071	21031	157	143	127	130	169	145.2	0	0	0	0	0	0		1083	14467	14843	14928	14981	14981	14840	616	644	631	631	628	630	78	76	44	44	49	58.2
1084	21312	21385	20569	20135	22155	21111.2	154	143	128	128	166	143.8	0	0	0	0	0	0		1084	14514	14872	14973	15018	15018	14879	623	649	630	630	630	632.4	80	76	44	44	51	59
1085	21387	21472	20650	20216	22238	21192.6	151	150	128	128	169	145.2	0	0	0	0	0	0		1085	14568	14907	15028	15058	15058	14923.8	621	644	628	628	630	630.2	79	76	44	44	51	58.8
1086	21479	21545	20735	20296	22319	21274.8	151	150	126	129	168	144.8	0	0	0	0	0	0		1086	14610	14948	15086	15100	15100	14968.8	612	646	632	632	631	630.6	79	77	46	46	51	59.8
1087	21559	21627	20801	20380	22393	21352	155	155	130	134	164	147.6	0	0	0	0	0	0		1087	14646	14994	15128	15151	15151	15014	608	643	637	637	639	632.8	79	78	49	49	51	61.2
1088	21643	21709	20881	20471	22469	21434.6	161	160	123	137	166	149.4	0	0	0	0	0	0		1088	14687	15039	15175	15205	15205	15062.2	611	647	641	641	643	636.6	81	80	49	49	51	62
1089	21734	21782	20955	20545	22563	21515.8	161	160	120	137	172	150	0	0	0	0	0	0		1089	14741	15084	15221	15256	15256	15111.6	614	648	639	639	646	637.2	82	80	49	49	51	62.2
1090	21817	21876	21045	20627	22679	21608.8	163	158	123	134	175	150.6	0	0	0	0	0	0		1090	14810	15134	15267	15318	15318	15169.4	623	640	636	636	651	637.2	82	83	49	49	51	62.8
1091	21911	21963	21133	20709	22775	21698.2	174	157	122	139	174	153.2	0	0	0	0	0	0		1091	14870	15201	15304	15364	15364	15220.6	620	643	638	638	656	639	82	83	51	51	54	64.2
1092	22001	22039	21199	20789	22842	21774	175	156	121	141	170	152.6	0	0	0	0	0	0		1092	14917	15244	15340	15401	15401	15260.6	628	647	635	635	649	638.8	83	84	52	52	54	65
1093	22089	22123	21272	20882	22932	21859.6	178	161	122	141	176	155.6	0	0	0	0	0	0		1093	14957	15307	15384	15447	15447	15308.4	625	652	633	633	653	639.2	83	84	52	52	54	65
1094	22165	22199	21348	20948	23018	21935.6	177	161	123	140	173	154.8	0	0	0	0	0	0		1094	15009	15362	15430	15505	15505	15362.2	634	653	641	641	657	645.2	84	84	52	52	53	65
1095	22242	22303	21442	21024	23112	22024.6	178	167	126	141	179	158.2	0	0	0	0	0	0		1095	15060	15418	15474	15570	15570	15418.4	635	656	641	641	657	646	84	85	52	52	53	65.2
1096	22315	22375	21529	21111	23207	22107.4	176	163	127	141	179	157.2	0	0	0	0	0	0		1096	15097	15464	15514	15623	15623	15464.2	637	655	637	637	650	643.2	86	85	52	52	53	65.6
1097	22389	22458	21613	21183	23289	22186.4	171	162	127	140	179	155.8	0	0	0	0	0	0		1097	15153	15513	15557	15674	15674	15514.2	632	666	642	642	655	647.4	86	85	52	52	53	65.6
1098	22475	22532	21683	21277	23364	22266.2	177	165	127	142	177	157.6	0	0	0	0	0	0		1098	15206	15569	15609	15731	15731	15569.2	642	664	647	647	662	652.4	87	87	52	52	53	66.2
1099	22545	22608	21764	21360	23443	22344	183	165	126	147	184	161	0	0	0	0	0	0		1099	15248	15624	15648	15783	15783	15617.2	641	666	647	647	658	651.8	87	87	52	52	53	66.2
1100	22630	22674	21852	21449	23530	22427	181	165	126	147	187	161.2	0	0	0	0	0	0		1100	15294	15677	15712	15830	15830	15668.6	637	674	657	657	664	657.8	87	87	52	52	55	66.6
1101	22727	22751	21951	21519	23616	22512.8	180	162	130	144	192	161.6	0	0	0	0	0	0		1101	15348	15736	15762	15871	15871	15717.6	636	677	658	658	661	658	87	87	54	54	55	67.4
1102	22813	22831	22028	21605	23707	22596.8	177	161	129	146	188	160.2	0	0	0	0	0	0		1102	15406	15779	15815	15937	15937	15774.8	641	675	658	658	656	657.6	87	85	54	54	55	67
1103	22899	22917	22097	21689	23798	22680	176	163	128	149	186	160.4	0	0	0	0	0	0		1103	15466	15834	15861	15988	15988	15827.4	639	676	651	651	651	653.6	87	85	54	54	55	67
1104	22980	23006	22190	21778	23872	22765.2	172	162	129	150	186	159.8	0	0	0	0	0	0		1104	15510	15896	15910	16045	16045	15881.2	639	684	648	648	650	653.8	87	85	54	54	55	67
1105	23067	23111	22281	21864	23946	22853.8	168	167	134	150	188	161.4	0	0	0	0	0	0		1105	15561	15947	15955	16100	16100	15932.6	641	695	653	653	655	659.4	87	85	54	54	55	67
1106	23158	23195	22366	21949	24013	22936.2	169	169	137	149	186	162	0	0	0	0	0	0		1106	15598	16001	16008	16164	16164	15987	640	695	657	657	663	662.4	87	84	54	54	55	66.8
1107	23236	23297	22451	22031	24123	23027.6	169	165	140	157	188	163.8	0	0	0	0	0	0		1107	15650	16057	16061	16218	16218	16040.8	643	707	666	666	661	668.6	89	85	54	54	55	67.4
1108	23314	23379	22527	22108	24208	23107.2	173	169	142	155	187	165.2	0	0	0	0	0	0		1108	15695	16104	16098	16285	16285	16093.4	641	707	663	663	669	668.6	90	85	54	54	55	67.6
1109	23394	23463	22598	22190	24299	23188.8	170	168	143	156	192	165.8	0	0	0	0	0	0		1109	15744	16142	16147	16348	16348	16145.8	646	705	670	670	673	672.8	90	85	54	54	55	67.6
1110	23492	23540	22679	22279	24394	23276.8	172	168	140	158	197	167	0	0	0	0	0	0		1110	15788	16186	16191	16393	16393	16190.2	647	706	666	666	671	671.2	93	85	54	54	55	68.2
1111	23587	23625	22768	22350	24469	23359.8	178	172	140	160	196	169.2	0	0	0	0	0	0		1111	15837	16219	16257	16456	16456	16245	650	707	666	666	679	673.6	94	87	56	56	57	70
1112	23665	23721	22853	22430	24555	23444.8	176	170	139	157	193	167	0	0	0	0	0	0		1112	15900	16275	16313	16511	16511	16302	652	713	677	677	676	679	96	90	56	56	56	70.8
1113	23752	23815	22945	22511	24651	23534.8	173	168	138	157	195	166.2	0	0	0	0	0	0		1113	15957	16311	16375	16584	16584	16362.2	668	712	683	683	687	686.6	96	89	56	56	56	70.6
1114	23856	23906	23016	22597	24737	23622.4	174	164	136	161	193	165.6	0	0	0	0	0	0		1114	16012	16358	16440	16633	16633	16415.2	668	711	694	694	683	690	96	89	56	56	56	70.6
1115	23960	23991	23073	22669	24818	23702.2	175	166	132	161	193	165.4	0	0	0	0	0	0		1115	16062	16392	16505	16677	16677	16462.6	674	714	691	691	681	690.2	96	89	56	56	56	70.6
1116	24033	24093	23151	22735	24915	23785.4	177	165	132	155	193	164.4	0	0	0	0	0	0		1116	16107	16455	16566	16729	16729	16517.2	674	718	696	696	680	692.8	97	92	56	56	56	71.4
1117	24113	24196	23236	22828	24996	23873.8	176	161	131	157	192	163.4	0	0	0	0	0	0		1117	16163	16507	16622	16791	16791	16574.8	688	723	706	706	678	700.2	97	92	56	56	56	71.4
1118	24227	24291	23312	22900	25082	23962.4	179	161	131	164	191	165.2	0	0	0	0	0	0		1118	16203	16554	16669	16849	16849	16624.8	688	724	709	709	682	702.4	98	93	56	56	56	71.8
1119	24319	24378	23383	22971	25176	24045.4	180	171	128	162	185	165.2	0	0	0	0	0	0		1119	16256	16604	16725	16912	16912	16681.8	685	725	716	716	685	705.4	98	93	57	57	56	72.2
1120	24401	24466	23477	23069	25267	24136	176	171	127	162	191	165.4	0	0	0	0	0	0		1120	16308	16659	16797	16967	16967	16739.6	685	732	720	720	682	707.8	98	94	57	57	56	72.4
1121	24479	24555	23557	23152	25355	24219.6	177	168	125	162	188	164	0	0	0	0	0	0		1121	16371	16710	16852	17011	17011	16791	684	733	716	716	677	705.2	97	94	57	57	56	72.2
1122	24560	24652	23654	23234	25434	24306.8	177	169	124	170	188	165.6	0	0	0	0	0	0		1122	16429	16762	16903	17068	17068	16846	692	735	716	716	689	709.6	97	94	57	57	56	72.2
1123	24636	24740	23731	23301	25499	24381.4	176	174	123	166	183	164.4	0	0	0	0	0	0		1123	16484	16818	16951	17127	17127	16901.4	689	743	713	713	687	709	97	94	57	57	56	72.2
1124	24740	24832	23836	23369	25588	24473	177	173	123	166	178	163.4	0	0	0	0	0	0		1124	16519	16871	16999	17190	17190	16953.8	685	743	716	716	697	711.4	99	94	58	58	57	73.2
1125	24839	24933	23943	23467	25674	24571.2	177	183	130	173	179	168.4	0	0	0	0	0	0		1125	16573	16946	17061	17229	17229	17007.6	685	751	715	715	699	713	99	94	59	59	61	74.4
1126	24948	25031	24034	23550	25767	24666	182	186	136	174	182	172	0	0	0	0	0	0		1126	16622	16994	17124	17274	17274	17057.6	684	762	715	715	699	715	100	94	59	59	61	74.6
1127	25024	25128	24124	23625	25863	24752.8	186	185	138	170	181	172	0	0	0	0	0	0		1127	16664	17049	17170	17315	17315	17102.6	678	765	721	721	707	718.4	100	96	59	59	61	75
1128	25119	25219	24221	23721	25955	24847	187	187	141	176	180	174.2	0	0	0	0	0	0		1128	16707	17102	17203	17384	17384	17156	678	769	730	730	707	722.8	99	97	59	59	61	75
1129	25241	25301	24318	23805	26038	24940.6	195	184	144	175	176	174.8	0	0	0	0	0	0		1129	16752	17153	17260	17433	17433	17206.2	682	765	726	726	709	721.6	99	97	60	60	61	75.4
1130	25331	25401	24399	23898	26117	25029.2	193	187	146	177	178	176.2	0	0	0	0	0	0		1130	16817	17184	17316	17501	17501	17263.8	685	761	727	727	712	722.4	98	97	60	60	61	75.2
1131	25432	25487	24493	23981	26199	25118.4	200	189	145	173	177	176.8	0	0	0	0	0	0		1131	16877	17238	17371	17549	17549	17316.8	688	772	725	725	708	723.6	98	97	60	60	61	75.2
1132	25539	25571	24584	24086	26296	25215.2	202	189	142	179	179	178.2	0	0	0	0	0	0		1132	16918	17296	17433	17599	17599	17369	690	775	729	729	712	727	98	99	59	59	61	75.2
1133	25632	25661	24666	24155	26395	25301.8	202	188	142	181	179	178.4	0	0	0	0	0	0		1133	16965	17355	17476	17671	17671	17427.6	686	773	726	726	728	727.8	99	99	59	59	62	75.6
1134	25721	25760	24732	24247	26496	25391.2	207	182	142	177	176	176.8	0	0	0	0	0	0		1134	17022	17399	17530	17731	17731	17482.6	697	775	734	734	725	733	101	99	59	59	62	76
1135	25822	25855	24815	24333	26596	25484.2	209	190	140	180	184	180.6	0	0	0	0	0	0		1135	17064	17468	17589	17812	17812	17549	700	776	732	732	731	734.2	101	100	59	59	62	76.2
1136	25911	25947	24927	24412	26674	25574.2	206	191	139	180	185	180.2	0	0	0	0	0	0		1136	17129	17518	17650	17849	17849	17599	702	787	738	738	730	739	101	101	59	59	62	76.4
1137	26009	26039	25025	24496	26797	25673.2	217	186	147	177	191	183.6	0	0	0	0	0	0		1137	17190	17576	17706	17910	17910	17658.4	701	793	743	743	733	742.6	101	101	61	61	64	77.6
1138	26081	26153	25108	24581	26913	25767.2	212	185	147	179	197	184	0	0	0	0	0	0		1138	17243	17633	17775	17962	17962	17715	706	790	748	748	745	747.4	101	101	62	62	64	78
1139	26164	26256	25187	24657	27006	25854	211	183	142	184	198	183.6	0	0	0	0	0	0		1139	17278	17682	17831	18039	18039	17773.8	705	800	753	753	751	752.4	101	101	62	62	64	78
1140	26267	26363	25271	24748	27102	25950.2	209	183	139	192	196	183.8	0	0	0	0	0	0		1140	17344	17762	17894	18101	18101	17840.4	702	808	759	759	753	756.2	101	101	61	61	64	77.6
1141	26364	26467	25364	24824	27208	26045.4	209	191	138	189	192	183.8	0	0	0	0	0	0		1141	17393	17813	17964	18157	18157	17896.8	704	806	762	762	759	758.6	101	100	62	62	66	78.2
1142	26451	26571	25452	24903	27313	26138	205	194	143	188	201	186.2	0	0	0	0	0	0		1142	17450	17856	18034	18204	18204	17949.6	708	808	760	760	758	758.8	101	100	63	63	66	78.6
1143	26546	26686	25543	25002	27407	26236.8	205	193	141	188	201	185.6	0	0	0	0	0	0		1143	17498	17927	18092	18257	18257	18006.2	707	808	766	766	765	762.4	103	100	63	63	66	79
1144	26638	26770	25638	25092	27502	26328	202	190	146	188	200	185.2	0	0	0	0	0	0		1144	17558	17985	18148	18323	18323	18067.4	707	810	769	769	762	763.4	103	100	63	63	66	79
1145	26732	26850	25725	25186	27601	26418.8	207	188	145	190	199	185.8	0	0	0	0	0	0		1145	17609	18035	18212	18376	18376	18121.6	712	809	778	778	758	767	105	100	64	64	66	79.8
1146	26832	26946	25817	25283	27715	26518.6	205	187	147	189	202	186	0	0	0	0	0	0		1146	17662	18104	18267	18426	18426	18177	711	816	781	781	755	768.8	105	102	64	64	65	80
1147	26929	27034	25914	25369	27819	26613	210	187	149	190	205	188.2	0	0	0	0	0	0		1147	17708	18160	18307	18482	18482	18227.8	711	818	777	777	757	768	106	102	63	63	65	79.8
1148	27038	27124	26006	25460	27929	26711.4	208	186	154	187	204	187.8	0	0	0	0	0	0		1148	17769	18223	18365	18544	18544	18289	714	823	779	779	764	771.8	106	102	63	63	65	79.8
1149	27133	27226	26124	25543	28027	26810.6	208	185	157	188	201	187.8	0	0	0	0	0	0		1149	17823	18271	18420	18604	18604	18344.4	713	821	782	782	770	773.6	106	103	63	63	65	80
1150	27221	27328	26225	25624	28116	26902.8	210	187	156	187	203	188.6	0	0	0	0	0	0		1150	17885	18334	18467	18676	18676	18407.6	721	829	779	779	776	776.8	106	105	63	63	66	80.6
1151	27319	27421	26318	25715	28204	26995.4	209	185	151	189	201	187	0	0	0	0	0	0		1151	17938	18403	18538	18726	18726	18466.2	720	826	784	784	781	779	105	105	65	65	67	81.4
1152	27431	27533	26413	25823	28291	27098.2	213	188	156	188	199	188.8	0	0	0	0	0	0		1152	17982	18463	18592	18792	18792	18524.2	714	833	784	784	783	779.6	105	105	65	65	67	81.4
1153	27518	27636	26512	25920	28398	27196.8	213	186	153	187	203	188.4	0	0	0	0	0	0		1153	18036	18517	18646	18856	18856	18582.2	718	835	788	788	790	783.8	107	106	67	67	68	83
1154	27622	27739	26615	25994	28502	27294.4	218	188	152	183	205	189.2	0	0	0	0	0	0		1154	18098	18584	18715	18926	18926	18649.8	718	850	790	790	794	788.4	105	106	67	67	68	82.6
1155	27717	27845	26704	26081	28601	27389.6	221	186	155	182	209	190.6	0	0	0	0	0	0		1155	18170	18642	18778	18994	18994	18715.6	729	847	786	786	798	789.2	106	107	67	67	68	83
1156	27834	27949	26818	26175	28701	27495.4	225	186	165	182	204	192.4	0	0	0	0	0	0		1156	18224	18696	18832	19045	19045	18768.4	728	843	790	790	792	788.6	105	107	67	67	67	82.6
1157	27930	28062	26908	26268	28799	27593.4	229	192	166	182	207	195.2	0	0	0	0	0	0		1157	18287	18755	18889	19111	19111	18830.6	726	842	794	794	795	790.2	107	106	67	67	67	82.8
1158	28028	28161	26977	26339	28920	27685	227	193	162	181	209	194.4	0	0	0	0	0	0		1158	18341	18825	18972	19168	19168	18894.8	724	843	806	806	792	794.2	106	106	68	68	67	83
1159	28117	28263	27073	26434	29043	27786	232	194	173	183	217	199.8	0	0	0	0	0	0		1159	18401	18865	19032	19233	19233	18952.8	738	846	809	809	788	798	106	106	68	68	69	83.4
1160	28221	28368	27181	26540	29170	27896	235	196	170	184	217	200.4	0	0	0	0	0	0		1160	18461	18933	19099	19311	19311	19023	737	843	814	814	794	800.4	106	106	66	66	72	83.2
1161	28305	28467	27283	26627	29294	27995.2	234	200	170	183	224	202.2	0	0	0	0	0	0		1161	18530	19016	19150	19370	19370	19087.2	742	855	811	811	795	802.8	106	106	66	66	71	83
1162	28393	28564	27397	26726	29391	28094.2	240	199	174	184	221	203.6	0	0	0	0	0	0		1162	18596	19095	19218	19438	19438	19157	741	863	832	832	798	813.2	106	107	68	68	71	84
1163	28479	28685	27495	26819	29511	28197.8	236	200	176	185	229	205.2	0	0	0	0	0	0		1163	18662	19158	19277	19486	19486	19213.8	743	867	836	836	798	816	105	107	70	70	71	84.6
1164	28579	28801	27595	26914	29623	28302.4	232	197	174	187	225	203	0	0	0	0	0	0		1164	18722	19226	19354	19536	19536	19274.8	743	870	845	845	802	821	106	109	73	73	73	86.8
1165	28683	28899	27686	26999	29732	28399.8	237	196	172	188	232	205	0	0	0	0	0	0		1165	18771	19281	19424	19585	19585	19329.2	741	865	839	839	807	818.2	107	109	74	74	74	87.6
1166	28778	29032	27788	27103	29856	28511.4	230	196	170	197	240	206.6	0	0	0	0	0	0		1166	18817	19345	19473	19657	19657	19389.8	743	868	840	840	806	819.4	107	111	74	74	74	88
1167	28882	29140	27884	27194	29966	28613.2	236	195	169	195	236	206.2	0	0	0	0	0	0		1167	18873	19428	19532	19724	19724	19456.2	745	869	837	837	813	820.2	110	113	74	74	73	88.8
1168	29008	29254	27975	27279	30074	28718	244	199	168	195	241	209.4	0	0	0	0	0	0		1168	18920	19477	19591	19799	19799	19517.2	745	870	840	840	816	822.2	112	115	74	74	75	90
1169	29102	29368	28104	27371	30172	28823.4	242	200	175	194	237	209.6	0	0	0	0	0	0		1169	18982	19547	19643	19864	19864	19580	747	868	840	840	815	822	111	117	74	74	75	90.2
1170	29206	29479	28208	27495	30292	28936	241	200	172	192	239	208.8	0	0	0	0	0	0		1170	19049	19615	19714	19933	19933	19648.8	764	870	846	846	820	829.2	111	118	74	74	75	90.4
1171	29296	29581	28328	27602	30408	29043	241	200	175	199	244	211.8	0	0	0	0	0	0		1171	19109	19691	19781	19987	19987	19711	774	875	843	843	820	831	111	121	74	74	75	91
1172	29433	29699	28425	27703	30503	29152.6	247	201	176	199	242	213	0	0	0	0	0	0		1172	19164	19757	19840	20052	20052	19773	775	875	845	845	821	832.2	111	121	74	74	75	91
1173	29553	29833	28523	27806	30626	29268.2	250	206	175	200	248	215.8	0	0	0	0	0	0		1173	19230	19830	19920	20119	20119	19843.6	772	879	853	853	825	836.4	111	121	75	75	76	91.6
1174	29661	29951	28637	27894	30724	29373.4	245	205	179	196	246	214.2	0	0	0	0	0	0		1174	19298	19886	19988	20183	20183	19907.6	773	884	855	855	829	839.2	114	121	77	77	78	93.4
1175	29767	30056	28748	27975	30827	29474.6	246	202	186	192	241	213.4	0	0	0	0	0	0		1175	19366	19952	20051	20232	20232	19966.6	771	881	851	851	824	835.6	116	121	77	77	78	93.8
1176	29880	30171	28840	28081	30957	29585.8	241	201	190	189	246	213.4	0	0	0	0	0	0		1176	19442	20032	20122	20301	20301	20039.6	778	885	853	853	822	838.2	116	121	77	77	78	93.8
1177	29983	30281	28964	28164	31063	29691	240	204	188	190	246	213.6	0	0	0	0	0	0		1177	19516	20101	20181	20374	20374	20109.2	782	883	852	852	822	838.2	116	121	77	77	78	93.8
1178	30096	30413	29084	28253	31179	29805	251	211	188	194	246	218	0	0	0	0	0	0		1178	19583	20170	20243	20448	20448	20178.4	781	888	855	855	831	842	116	122	76	76	80	94
1179	30220	30534	29198	28359	31276	29917.4	248	210	186	192	240	215.2	0	0	0	0	0	0		1179	19646	20237	20305	20523	20523	20246.8	786	889	853	853	835	843.2	116	122	76	76	83	94.6
1180	30339	30645	29315	28468	31405	30034.4	246	211	186	189	241	214.6	0	0	0	0	0	0		1180	19711	20298	20377	20585	20585	20311.2	784	892	859	859	837	846.2	116	121	75	75	83	94
1181	30464	30734	29410	28557	31531	30139.2	245	213	188	191	247	216.8	0	0	0	0	0	0		1181	19783	20374	20454	20661	20661	20386.6	790	888	868	868	847	852.2	117	123	75	75	83	94.6
1182	30568	30820	29510	28677	31638	30242.6	241	209	185	189	244	213.6	0	0	0	0	0	0		1182	19838	20457	20515	20722	20722	20450.8	788	893	867	867	845	852	117	123	77	77	83	95.4
1183	30681	30926	29595	28796	31753	30350.2	243	208	179	194	251	215	0	0	0	0	0	0		1183	19905	20504	20569	20796	20796	20514	786	888	864	864	851	850.6	119	122	78	78	83	96
1184	30797	31040	29713	28895	31876	30464.2	243	210	178	194	250	215	0	0	0	0	0	0		1184	19969	20570	20648	20865	20865	20583.4	786	900	871	871	858	857.2	119	123	80	80	83	97
1185	30910	31154	29836	29018	31983	30580.2	246	214	177	197	253	217.4	0	0	0	0	0	0		1185	20053	20627	20727	20932	20932	20654.2	789	897	881	881	858	861.2	119	123	80	80	83	97
1186	31004	31272	29962	29122	32105	30693	244	217	176	198	253	217.6	0	0	0	0	0	0		1186	20122	20705	20811	20994	20994	20725.2	788	904	891	891	853	865.4	118	124	79	79	83	96.6
1187	31116	31363	30058	29227	32215	30795.8	241	221	174	197	253	217.2	0	0	0	0	0	0		1187	20201	20785	20878	21057	21057	20795.6	804	909	887	887	853	868	118	125	80	80	83	97.2
1188	31233	31490	30177	29339	32322	30912.2	245	232	175	203	252	221.4	0	0	0	0	0	0		1188	20276	20859	20961	21115	21115	20865.2	802	920	909	909	856	879.2	117	125	82	82	83	97.8
1189	31339	31589	30316	29455	32421	31024	247	231	171	208	247	220.8	0	0	0	0	0	0		1189	20346	20934	21028	21178	21178	20932.8	810	927	910	910	851	881.6	117	125	82	82	83	97.8
1190	31462	31718	30418	29563	32535	31139.2	245	235	173	206	242	220.2	0	0	0	0	0	0		1190	20410	21002	21090	21238	21238	20995.6	811	929	909	909	851	881.8	117	125	82	82	82	97.6
1191	31580	31824	30537	29679	32645	31253	246	238	178	214	239	223	0	0	0	0	0	0		1191	20484	21061	21154	21299	21299	21059.4	818	927	914	914	860	886.6	118	128	81	81	85	98.6
1192	31707	31957	30658	29790	32786	31379.6	247	238	186	209	237	223.4	0	0	0	0	0	0		1192	20562	21142	21229	21382	21382	21139.4	820	931	910	910	860	886.2	118	128	81	81	85	98.6
1193	31842	32080	30766	29904	32928	31504	248	244	200	211	241	228.8	0	0	0	0	0	0		1193	20615	21208	21310	21446	21446	21205	830	933	912	912	861	889.6	117	128	80	80	87	98.4
1194	31950	32209	30881	30011	33045	31619.2	254	244	200	208	239	229	0	0	0	0	0	0		1194	20692	21282	21379	21505	21505	21272.6	838	934	912	912	861	891.4	119	128	82	82	88	99.8
1195	32078	32327	31015	30104	33169	31738.6	261	244	199	205	238	229.4	0	0	0	0	0	0		1195	20786	21360	21437	21574	21574	21346.2	852	933	912	912	861	894	119	128	82	82	87	99.6
1196	32205	32439	31118	30201	33289	31850.4	262	244	202	204	236	229.6	0	0	0	0	0	0		1196	20863	21426	21510	21647	21647	21418.6	858	932	913	913	864	896	119	130	83	83	88	100.6
1197	32331	32552	31235	30320	33412	31970	260	249	202	202	234	229.4	0	0	0	0	0	0		1197	20935	21509	21570	21718	21718	21490	863	944	909	909	866	898.2	119	132	83	83	88	101
1198	32456	32675	31341	30433	33556	32092.2	261	247	199	208	237	230.4	0	0	0	0	0	0		1198	20999	21587	21648	21781	21781	21559.2	856	940	914	914	872	899.2	119	132	87	87	90	103
1199	32574	32782	31468	30549	33687	32212	262	249	202	206	237	231.2	0	0	0	0	0	0		1199	21070	21653	21716	21849	21849	21627.4	858	949	921	921	875	904.8	120	132	87	87	90	103.2
1200	32686	32919	31592	30671	33814	32336.4	259	251	203	214	239	233.2	0	0	0	0	0	0		1200	21130	21732	21797	21909	21909	21695.4	858	951	935	935	865	908.8	120	133	87	87	90	103.4
1201	32807	33012	31702	30778	33946	32449	262	247	199	213	239	232	0	0	0	0	0	0		1201	21206	21789	21869	21974	21974	21762.4	861	947	936	936	864	908.8	120	133	86	86	90	103
1202	32943	33142	31814	30925	34076	32580	262	248	196	213	243	232.4	0	0	0	0	0	0		1202	21275	21858	21939	22053	22053	21835.6	870	949	930	930	870	909.8	120	133	86	86	90	103
1203	33057	33247	31926	31043	34213	32697.2	263	245	198	216	240	232.4	0	0	0	0	0	0		1203	21328	21945	22006	22116	22116	21902.2	866	952	925	925	869	907.4	122	133	86	86	90	103.4
1204	33176	33367	32048	31167	34358	32823.2	263	245	196	221	239	232.8	0	0	0	0	0	0		1204	21401	22042	22085	22211	22211	21990	868	962	929	929	879	913.4	122	134	87	87	91	104.2
1205	33302	33485	32172	31295	34496	32950	263	245	196	224	239	233.4	0	0	0	0	0	0		1205	21480	22108	22149	22272	22272	22056.2	863	967	929	929	885	914.6	124	136	87	87	92	105.2
1206	33443	33600	32296	31413	34629	33076.2	275	242	192	229	246	236.8	0	0	0	0	0	0		1206	21559	22182	22231	22346	22346	22132.8	866	969	936	936	886	918.6	124	136	87	87	91	105
1207	33563	33757	32407	31511	34738	33195.2	273	249	187	221	242	234.4	0	0	0	0	0	0		1207	21644	22258	22295	22418	22418	22206.6	879	972	939	939	898	925.4	125	136	87	87	92	105.4
1208	33681	33883	32531	31638	34885	33323.6	271	246	190	224	254	237	0	0	0	0	0	0		1208	21708	22338	22361	22487	22487	22276.2	883	971	936	936	899	925	126	136	87	87	96	106.4
1209	33788	34020	32649	31754	35038	33449.8	268	255	188	229	261	240.2	0	0	0	0	0	0		1209	21797	22441	22434	22563	22563	22359.6	885	986	938	938	916	932.6	126	136	87	87	96	106.4
1210	33908	34141	32756	31895	35182	33576.4	264	253	189	231	263	240	0	0	0	0	0	0		1210	21865	22500	22521	22643	22643	22434.4	882	990	949	949	922	938.4	128	136	87	87	98	107.2
1211	34035	34267	32898	32026	35319	33709	265	247	190	230	257	237.8	0	0	0	0	0	0		1211	21960	22576	22606	22715	22715	22514.4	893	992	963	963	924	947	128	136	87	87	98	107.2
1212	34184	34386	33047	32142	35429	33837.6	265	253	198	225	257	239.6	0	0	0	0	0	0		1212	22034	22662	22683	22782	22782	22588.6	895	997	969	969	926	951.2	129	136	87	87	98	107.4
1213	34303	34529	33176	32280	35570	33971.6	264	252	201	226	258	240.2	0	0	0	0	0	0		1213	22112	22738	22761	22853	22853	22663.4	901	1004	980	980	925	958	131	136	86	86	98	107.4
1214	34426	34661	33317	32409	35712	34105	269	251	205	225	263	242.6	0	0	0	0	0	0		1214	22166	22812	22834	22934	22934	22736	894	1008	982	982	926	958.4	130	137	86	86	99	107.6
1215	34564	34793	33431	32524	35861	34234.6	267	250	205	225	262	241.8	0	0	0	0	0	0		1215	22235	22904	22880	23010	23010	22807.8	889	1015	980	980	928	958.4	130	138	86	86	101	108.2
1216	34673	34917	33560	32673	36011	34366.8	268	249	204	230	261	242.4	0	0	0	0	0	0		1216	22326	22980	22956	23081	23081	22884.8	895	1021	985	985	924	962	130	138	85	85	101	107.8
1217	34830	35040	33685	32825	36163	34508.6	276	251	207	230	265	245.8	0	0	0	0	0	0		1217	22390	23058	23038	23161	23161	22961.6	888	1024	996	996	940	968.8	132	139	85	85	103	108.8
1218	34953	35164	33806	32956	36324	34640.6	275	249	207	227	271	245.8	0	0	0	0	0	0		1218	22451	23149	23093	23234	23234	23032.2	887	1030	994	994	941	969.2	130	139	85	85	105	108.8
1219	35088	35285	33944	33083	36450	34770	277	253	214	229	271	248.8	0	0	0	0	0	0		1219	22522	23220	23173	23305	23305	23105	892	1034	998	998	939	972.2	130	139	85	85	104	108.6
1220	35219	35406	34080	33232	36605	34908.4	274	258	214	235	268	249.8	0	0	0	0	0	0		1220	22589	23295	23255	23391	23391	23184.2	897	1048	993	993	949	976	130	139	84	84	104	108.2
1221	35355	35523	34198	33375	36767	35043.6	278	261	211	238	267	251	0	0	0	0	0	0		1221	22656	23376	23330	23455	23455	23254.4	901	1060	989	989	952	978.2	130	139	84	84	104	108.2
1222	35477	35648	34332	33496	36899	35170.4	279	264	213	239	264	251.8	0	0	0	0	0	0		1222	22720	23460	23405	23514	23514	23322.6	908	1067	993	993	949	982	130	140	85	85	104	108.8
1223	35602	35776	34461	33634	37035	35301.6	283	270	211	245	257	253.2	0	0	0	0	0	0		1223	22796	23534	23487	23597	23597	23402.2	906	1070	999	999	945	983.8	130	140	85	85	104	108.8
1224	35729	35922	34591	33765	37158	35433	287	275	216	243	254	255	0	0	0	0	0	0		1224	22878	23598	23578	23676	23676	23481.2	909	1072	1010	1010	953	990.8	130	140	86	86	104	109.2
1225	35859	36057	34737	33898	37289	35568	288	273	224	244	259	257.6	0	0	0	0	0	0		1225	22963	23681	23651	23744	23744	23556.6	916	1072	1006	1006	949	989.8	130	140	86	86	104	109.2
1226	36002	36177	34858	34045	37448	35706	293	279	220	248	257	259.4	0	0	0	0	0	0		1226	23057	23766	23733	23829	23829	23642.8	920	1076	1012	1012	954	994.8	130	139	86	86	104	109
1227	36130	36302	34988	34172	37602	35838.8	294	280	216	252	255	259.4	0	0	0	0	0	0		1227	23121	23840	23827	23901	23901	23718	925	1079	1022	1022	954	1000.4	132	140	86	86	103	109.4
1228	36265	36417	35130	34291	37744	35969.4	294	280	216	248	261	259.8	0	0	0	0	0	0		1228	23207	23936	23917	23965	23965	23798	933	1083	1028	1028	957	1005.8	134	143	87	87	103	110.8
1229	36417	36577	35259	34430	37893	36115.2	291	289	215	244	260	259.8	0	0	0	0	0	0		1229	23301	24020	23999	24061	24061	23888.4	937	1089	1028	1028	963	1009	135	143	87	87	103	111
1230	36585	36708	35389	34569	38062	36262.6	291	282	214	253	259	259.8	0	0	0	0	0	0		1230	23371	24100	24105	24143	24143	23972.4	932	1093	1030	1030	977	1012.4	137	144	86	86	103	111.2
1231	36751	36853	35518	34685	38208	36403	297	287	216	257	255	262.4	0	0	0	0	0	0		1231	23462	24178	24187	24199	24199	24045	939	1094	1032	1032	981	1015.6	139	143	86	86	102	111.2
1232	36880	36968	35659	34827	38343	36535.4	302	282	222	259	255	264	0	0	0	0	0	0		1232	23515	24259	24271	24274	24274	24118.6	939	1096	1041	1041	980	1019.4	139	143	88	88	101	111.8
1233	37019	37113	35786	34973	38502	36678.6	302	283	217	265	257	264.8	0	0	0	0	0	0		1233	23608	24350	24352	24363	24363	24207.2	949	1098	1049	1049	984	1025.8	142	143	89	89	101	112.8
1234	37158	37245	35900	35091	38649	36808.6	309	284	216	259	253	264.2	0	0	0	0	0	0		1234	23717	24420	24439	24446	24446	24293.6	953	1098	1055	1055	984	1029	146	145	88	88	102	113.8
1235	37309	37370	36006	35234	38806	36945	303	283	215	255	257	262.6	0	0	0	0	0	0		1235	23791	24496	24513	24517	24517	24366.8	956	1104	1056	1056	986	1031.6	146	145	89	89	102	114.2
1236	37446	37501	36162	35365	38965	37087.8	308	280	225	252	258	264.6	0	0	0	0	0	0		1236	23872	24587	24595	24600	24600	24450.8	964	1108	1060	1060	985	1035.4	146	148	89	89	102	114.8
1237	37597	37629	36301	35498	39104	37225.8	307	283	226	254	254	264.8	0	0	0	0	0	0		1237	23942	24674	24692	24681	24681	24534	972	1110	1061	1061	995	1039.8	148	147	89	89	102	115
1238	37759	37785	36426	35630	39246	37369.2	313	286	226	257	258	268	0	0	0	0	0	0		1238	24014	24765	24797	24741	24741	24611.6	974	1115	1065	1065	987	1041.2	148	148	89	89	102	115.2
1239	37887	37937	36573	35779	39395	37514.2	320	287	228	257	262	270.8	0	0	0	0	0	0		1239	24091	24822	24892	24815	24815	24687	974	1118	1078	1078	995	1048.6	148	148	89	89	104	115.6
1240	38022	38095	36696	35914	39547	37654.8	324	281	224	256	263	269.6	0	0	0	0	0	0		1240	24159	24869	24967	24871	24871	24747.4	974	1112	1077	1077	1001	1048.2	148	150	89	89	103	115.8
1241	38150	38231	36840	36041	39707	37793.8	323	283	229	251	264	270	0	0	0	0	0	0		1241	24260	24946	25060	24980	24980	24845.2	971	1114	1081	1081	1005	1050.4	147	150	90	90	103	116
1242	38291	38374	36984	36194	39826	37933.8	327	279	229	256	262	270.6	0	0	0	0	0	0		1242	24337	25016	25125	25071	25071	24924	977	1105	1077	1077	1015	1050.2	147	151	91	91	103	116.6
1243	38442	38506	37128	36333	39964	38074.6	330	273	236	262	265	273.2	0	0	0	0	0	0		1243	24412	25103	25211	25154	25154	25006.8	982	1120	1085	1085	1012	1056.8	147	151	91	91	103	116.6
1244	38598	38659	37267	36461	40151	38227.2	330	275	242	267	266	276	0	0	0	0	0	0		1244	24500	25171	25293	25234	25234	25086.4	990	1123	1083	1083	1020	1059.8	147	153	91	91	102	116.8
1245	38737	38795	37409	36625	40306	38374.4	329	276	241	264	277	277.4	0	0	0	0	0	0		1245	24596	25253	25373	25333	25333	25177.6	1002	1136	1085	1085	1031	1067.8	147	154	91	91	104	117.4
1246	38878	38945	37546	36753	40465	38517.4	324	274	242	257	279	275.2	0	0	0	0	0	0		1246	24668	25320	25462	25429	25429	25261.6	1000	1141	1088	1088	1035	1070.4	149	154	91	91	104	117.8
1247	39034	39086	37675	36889	40599	38656.6	323	271	244	264	276	275.6	0	0	0	0	0	0		1247	24747	25416	25564	25546	25546	25363.8	1007	1146	1100	1100	1057	1082	153	157	93	93	105	120.2
1248	39165	39270	37818	37039	40747	38807.8	320	271	244	270	276	276.2	0	0	0	0	0	0		1248	24828	25496	25673	25629	25629	25451	1009	1149	1112	1112	1069	1090.2	151	157	93	93	106	120
1249	39317	39415	37938	37167	40902	38947.8	323	277	250	270	276	279.2	0	0	0	0	0	0		1249	24915	25574	25780	25722	25722	25542.6	1017	1149	1117	1117	1083	1096.6	151	159	93	93	110	121.2
1250	39490	39566	38089	37302	41057	39100.8	322	278	245	276	291	282.4	0	0	0	0	0	0		1250	24998	25664	25858	25799	25799	25623.6	1014	1154	1113	1113	1086	1096	151	158	92	92	112	121
1251	39642	39708	38222	37446	41233	39250.2	321	281	249	273	293	283.4	0	0	0	0	0	0		1251	25081	25753	25944	25886	25886	25710	1018	1155	1113	1113	1091	1098	150	157	91	91	112	120.2
1252	39771	39866	38354	37612	41383	39397.2	322	284	247	278	292	284.6	0	0	0	0	0	0		1252	25158	25829	26032	25972	25972	25792.6	1012	1154	1130	1130	1103	1105.8	149	157	91	91	112	120
1253	39918	39996	38510	37779	41530	39546.6	317	282	246	279	287	282.2	0	0	0	0	0	0		1253	25261	25920	26125	26057	26057	25884	1022	1166	1129	1129	1103	1109.8	149	157	91	91	112	120
1254	40082	40160	38653	37918	41685	39699.6	313	282	253	281	293	284.4	0	0	0	0	0	0		1254	25350	26028	26206	26159	26159	25980.4	1027	1173	1134	1134	1123	1118.2	150	160	91	91	112	120.8
1255	40247	40322	38807	38049	41835	39852	317	289	254	287	297	288.8	0	0	0	0	0	0		1255	25429	26115	26325	26228	26228	26065	1029	1185	1145	1145	1113	1123.4	151	161	93	93	112	122
1256	40389	40469	38961	38191	41993	40000.6	314	289	258	286	305	290.4	0	0	0	0	0	0		1256	25533	26208	26409	26312	26312	26154.8	1033	1194	1151	1151	1116	1129	152	161	93	93	112	122.2
1257	40535	40631	39108	38328	42143	40149	319	296	260	287	302	292.8	0	0	0	0	0	0		1257	25603	26306	26504	26405	26405	26244.6	1022	1197	1156	1156	1123	1130.8	152	161	93	93	112	122.2
1258	40681	40756	39253	38474	42282	40289.2	317	300	264	284	298	292.6	0	0	0	0	0	0		1258	25716	26417	26599	26482	26482	26339.2	1029	1207	1167	1167	1139	1141.8	152	162	93	93	112	122.4
1259	40840	40895	39391	38601	42427	40430.8	313	306	260	285	290	290.8	0	0	0	0	0	0		1259	25796	26502	26688	26582	26582	26430	1031	1212	1158	1158	1148	1141.4	153	163	93	93	114	123.2
1260	40986	41026	39523	38736	42555	40565.2	318	308	258	289	288	292.2	0	0	0	0	0	0		1260	25887	26592	26759	26676	26676	26518	1033	1222	1161	1161	1152	1145.8	154	162	93	93	113	123
1261	41149	41175	39692	38899	42698	40722.6	323	307	268	288	287	294.6	0	0	0	0	0	0		1261	26003	26680	26854	26762	26762	26612.2	1035	1225	1172	1172	1154	1151.6	154	163	96	96	113	124.4
1262	41294	41326	39836	39036	42853	40869	325	311	277	285	289	297.4	0	0	0	0	0	0		1262	26087	26736	26934	26857	26857	26694.2	1033	1229	1169	1169	1161	1152.2	154	163	96	96	113	124.4
1263	41425	41484	39965	39171	43020	41013	320	308	278	286	284	295.2	0	0	0	0	0	0		1263	26168	26806	27038	26947	26947	26781.2	1039	1225	1171	1171	1165	1154.2	154	164	96	96	114	124.8
1264	41570	41643	40072	39313	43162	41152	321	316	287	285	276	297	0	0	0	0	0	0		1264	26253	26897	27120	27028	27028	26865.2	1045	1233	1171	1171	1164	1156.8	155	165	98	98	114	126
1265	41730	41801	40231	39458	43329	41309.8	326	315	297	286	281	301	0	0	0	0	0	0		1265	26352	26985	27209	27120	27120	26957.2	1047	1241	1172	1172	1170	1160.4	155	167	96	96	113	125.4
1266	41884	41978	40373	39607	43487	41465.8	328	322	293	290	279	302.4	0	0	0	0	0	0		1266	26441	27053	27288	27211	27211	27040.8	1055	1244	1170	1170	1173	1162.4	155	167	99	99	113	126.6
1267	42046	42117	40532	39767	43645	41621.4	334	321	289	302	279	305	0	0	0	0	0	0		1267	26519	27131	27385	27298	27298	27126.2	1062	1252	1167	1167	1184	1166.4	154	167	98	98	113	126
1268	42218	42283	40679	39928	43797	41781	342	323	301	306	273	309	0	0	0	0	0	0		1268	26615	27231	27473	27386	27386	27218.2	1070	1262	1174	1174	1184	1172.8	154	167	98	98	113	126
1269	42374	42468	40824	40097	43931	41938.8	344	318	301	308	271	308.4	0	0	0	0	0	0		1269	26691	27311	27562	27512	27512	27317.6	1067	1261	1180	1180	1198	1177.2	157	165	99	99	116	127.2
1270	42529	42634	40976	40233	44091	42092.6	341	319	294	313	282	309.8	0	0	0	0	0	0		1270	26777	27393	27632	27613	27613	27405.6	1070	1264	1173	1173	1211	1178.2	159	167	99	99	116	128
1271	42701	42794	41132	40405	44225	42251.4	343	318	296	324	280	312.2	0	0	0	0	0	0		1271	26894	27493	27717	27691	27691	27497.2	1079	1273	1170	1170	1220	1182.4	160	165	101	101	116	128.6
1272	42873	42947	41262	40596	44364	42408.4	349	314	297	325	280	313	0	0	0	0	0	0		1272	26988	27591	27778	27799	27799	27591	1087	1267	1167	1167	1226	1182.8	160	166	102	102	116	129.2
1273	43026	43082	41425	40767	44541	42568.2	358	311	292	326	282	313.8	0	0	0	0	0	0		1273	27067	27701	27863	27887	27887	27681	1091	1272	1171	1171	1229	1186.8	162	166	102	102	119	130.2
1274	43180	43240	41591	40928	44740	42735.8	360	307	291	328	283	313.8	0	0	0	0	0	0		1274	27156	27803	27934	27983	27983	27771.8	1094	1281	1172	1172	1232	1190.2	162	170	105	105	119	132.2
1275	43336	43402	41744	41076	44900	42891.6	356	307	287	335	283	313.6	0	0	0	0	0	0		1275	27241	27888	28008	28050	28050	27847.4	1090	1279	1175	1175	1232	1190.2	162	170	107	107	119	133
1276	43527	43600	41910	41224	45105	43073.2	358	310	286	329	289	314.4	0	0	0	0	0	0		1276	27315	27975	28104	28163	28163	27944	1097	1284	1173	1173	1233	1192	164	169	107	107	119	133.2
1277	43687	43782	42052	41384	45274	43235.8	357	307	280	328	289	312.2	0	0	0	0	0	0		1277	27425	28054	28191	28271	28271	28042.4	1106	1295	1178	1178	1241	1199.6	165	169	107	107	118	133.2
1278	43845	43949	42211	41529	45442	43395.2	355	306	281	328	295	313	0	0	0	0	0	0		1278	27509	28141	28265	28384	28384	28136.6	1109	1290	1176	1176	1256	1201.4	166	169	106	106	118	133
1279	44033	44118	42379	41696	45574	43560	362	304	282	322	290	312	0	0	0	0	0	0		1279	27604	28239	28377	28475	28475	28234	1116	1298	1187	1187	1256	1208.8	166	172	110	110	120	135.6
1280	44173	44304	42540	41815	45761	43718.6	357	304	282	314	295	310.4	0	0	0	0	0	0		1280	27700	28319	28497	28604	28604	28344.8	1115	1305	1194	1194	1285	1218.6	165	172	110	110	122	135.8
1281	44319	44455	42703	41975	45936	43877.6	353	305	283	308	297	309.2	0	0	0	0	0	0		1281	27793	28397	28597	28687	28687	28432.2	1127	1311	1196	1196	1280	1222	165	172	109	109	123	135.6
1282	44459	44609	42862	42105	46110	44029	349	307	278	309	301	308.8	0	0	0	0	0	0		1282	27893	28503	28686	28787	28787	28531.2	1137	1314	1203	1203	1287	1228.8	168	174	109	109	124	136.8
1283	44616	44782	43005	42256	46262	44184.2	345	309	283	305	301	308.6	0	0	0	0	0	0		1283	27992	28612	28770	28884	28884	28628.4	1140	1318	1208	1208	1284	1231.6	170	175	108	108	124	137
1284	44789	44954	43145	42397	46438	44344.6	343	311	285	300	299	307.6	0	0	0	0	0	0		1284	28084	28715	28855	28991	28991	28727.2	1152	1328	1215	1215	1282	1238.4	171	175	106	106	124	136.4
1285	44968	45147	43294	42563	46589	44512.2	344	309	282	300	296	306.2	0	0	0	0	0	0		1285	28169	28793	28956	29095	29095	28821.6	1146	1324	1218	1218	1283	1237.8	171	176	106	106	124	136.6
1286	45149	45326	43445	42722	46783	44685	344	313	281	299	304	308.2	0	0	0	0	0	0		1286	28253	28877	29045	29194	29194	28912.6	1142	1333	1220	1220	1280	1239	171	176	105	105	123	136
1287	45297	45498	43622	42860	46951	44845.6	340	315	297	298	304	310.8	0	0	0	0	0	0		1287	28371	28978	29151	29277	29277	29010.8	1151	1341	1231	1231	1279	1246.6	171	176	107	107	126	137.4
1288	45470	45670	43806	43007	47135	45017.6	341	314	293	305	307	312	0	0	0	0	0	0		1288	28483	29059	29235	29374	29374	29105	1146	1344	1235	1235	1285	1249	170	176	110	110	126	138.4
1289	45627	45855	43997	43159	47337	45195	343	322	300	314	310	317.8	0	0	0	0	0	0		1289	28587	29141	29314	29452	29452	29189.2	1150	1351	1236	1236	1276	1249.8	171	178	112	112	125	139.6
1290	45787	46028	44181	43337	47524	45371.4	343	322	307	313	306	318.2	0	0	0	0	0	0		1290	28682	29222	29420	29565	29565	29290.8	1155	1357	1235	1235	1288	1254	172	182	112	112	125	140.6
1291	45938	46202	44353	43511	47729	45546.6	338	331	315	312	314	322	0	0	0	0	0	0		1291	28779	29325	29537	29678	29678	29399.4	1158	1346	1244	1244	1291	1256.6	174	180	113	113	125	141
1292	46112	46378	44507	43664	47911	45714.4	342	332	316	314	325	325.8	0	0	0	0	0	0		1292	28850	29415	29640	29781	29781	29493.4	1169	1344	1252	1252	1292	1261.8	178	180	117	117	125	143.4
1293	46270	46553	44645	43820	48079	45873.4	341	340	321	317	325	328.8	0	0	0	0	0	0		1293	28936	29500	29728	29894	29894	29590.4	1172	1346	1247	1247	1298	1262	179	181	117	117	125	143.8
1294	46449	46711	44823	43988	48245	46043.2	341	335	319	317	321	326.6	0	0	0	0	0	0		1294	29018	29599	29829	30004	30004	29690.8	1167	1346	1256	1256	1297	1264.4	179	182	117	117	127	144.4
1295	46604	46896	44982	44166	48417	46213	344	334	317	322	325	328.4	0	0	0	0	0	0		1295	29083	29688	29920	30094	30094	29775.8	1161	1338	1253	1253	1297	1260.4	178	182	118	118	128	144.8
1296	46763	47087	45144	44309	48576	46375.8	347	329	310	318	331	327	0	0	0	0	0	0		1296	29194	29788	30037	30203	30203	29885	1165	1344	1266	1266	1298	1267.8	178	184	118	118	127	145
1297	46942	47245	45324	44465	48778	46550.8	346	331	316	318	328	327.8	0	0	0	0	0	0		1297	29307	29887	30145	30303	30303	29989	1176	1346	1274	1274	1299	1273.8	180	185	119	119	129	146.4
1298	47124	47440	45488	44614	48968	46726.8	347	333	321	312	333	329.2	0	0	0	0	0	0		1298	29407	29966	30247	30391	30391	30080.4	1189	1346	1278	1278	1297	1277.6	181	186	119	119	129	146.8
1299	47287	47612	45643	44781	49149	46894.4	353	330	323	318	331	331	0	0	0	0	0	0		1299	29495	30059	30344	30471	30471	30168	1192	1348	1283	1283	1294	1280	182	187	120	120	129	147.6
1300	47446	47777	45802	44974	49309	47061.6	353	327	322	331	330	332.6	0	0	0	0	0	0		1300	29601	30147	30414	30566	30566	30258.8	1202	1342	1284	1284	1291	1280.6	182	188	120	120	129	147.8
1301	47609	47948	46010	45146	49472	47237	361	330	322	331	323	333.4	0	0	0	0	0	0		1301	29698	30221	30513	30661	30661	30350.8	1220	1335	1279	1279	1300	1282.6	184	188	121	121	129	148.6
1302	47777	48106	46182	45300	49668	47406.6	364	328	322	326	320	332	0	0	0	0	0	0		1302	29790	30318	30611	30752	30752	30444.6	1228	1342	1288	1288	1299	1289	188	188	120	120	129	149
1303	47958	48292	46357	45468	49856	47586.2	362	324	331	325	319	332.2	0	0	0	0	0	0		1303	29897	30403	30720	30855	30855	30546	1235	1353	1287	1287	1291	1290.6	188	188	120	120	129	149
1304	48140	48470	46532	45631	50047	47764	365	327	329	334	324	335.8	0	0	0	0	0	0		1304	29989	30498	30813	30955	30955	30642	1235	1345	1297	1297	1300	1294.8	188	188	123	123	131	150.6
1305	48307	48652	46723	45780	50228	47938	364	331	332	334	314	335	0	0	0	0	0	0		1305	30079	30596	30884	31039	31039	30727.4	1239	1344	1299	1299	1291	1294.4	191	190	125	125	131	152.4
1306	48466	48830	46904	45964	50405	48113.8	369	331	326	331	313	334	0	0	0	0	0	0		1306	30169	30696	30979	31138	31138	30824	1240	1351	1307	1307	1298	1300.6	193	189	127	127	131	153.4
1307	48644	49014	47063	46122	50567	48282	368	333	325	338	308	334.4	0	0	0	0	0	0		1307	30258	30794	31052	31255	31255	30922.8	1235	1348	1307	1307	1301	1299.6	194	188	127	127	133	153.8
1308	48827	49205	47245	46268	50780	48465	366	342	324	334	316	336.4	0	0	0	0	0	0		1308	30356	30892	31147	31359	31359	31022.6	1240	1348	1312	1312	1306	1303.6	195	188	131	131	134	155.8
1309	48991	49367	47416	46424	50964	48632.4	366	343	329	330	313	336.2	0	0	0	0	0	0		1309	30461	30995	31259	31444	31444	31120.6	1248	1348	1310	1310	1311	1305.4	195	188	131	131	136	156.2
1310	49183	49557	47584	46589	51155	48813.6	366	350	332	329	315	338.4	0	0	0	0	0	0		1310	30526	31105	31363	31554	31554	31220.4	1244	1344	1305	1305	1319	1303.4	195	192	133	133	135	157.6
1311	49352	49735	47778	46766	51333	48992.8	368	347	333	334	316	339.6	0	0	0	0	0	0		1311	30618	31191	31472	31678	31678	31327.4	1234	1348	1312	1312	1332	1307.6	195	192	135	135	135	158.4
1312	49543	49930	47922	46943	51521	49171.8	367	353	334	338	312	340.8	0	0	0	0	0	0		1312	30679	31299	31575	31778	31778	31421.8	1226	1353	1316	1316	1344	1311	196	195	135	135	135	159.2
1313	49753	50112	48096	47109	51704	49354.8	374	354	334	331	314	341.4	0	0	0	0	0	0		1313	30761	31399	31692	31878	31878	31521.6	1221	1356	1326	1326	1336	1313	195	195	135	135	137	159.4
1314	49915	50283	48282	47252	51887	49523.8	375	355	333	327	314	340.8	0	0	0	0	0	0		1314	30863	31489	31808	31991	31991	31628.4	1230	1370	1326	1326	1348	1320	197	198	135	135	143	161.6
1315	50099	50503	48452	47422	52059	49707	367	358	331	339	316	342.2	0	0	0	0	0	0		1315	30954	31600	31905	32088	32088	31727	1225	1371	1333	1333	1351	1322.6	198	198	134	134	143	161.4
1316	50313	50685	48618	47599	52236	49890.2	372	362	331	339	318	344.4	0	0	0	0	0	0		1316	31043	31711	32012	32177	32177	31824	1233	1375	1327	1327	1350	1322.4	201	199	134	134	144	162.4
1317	50482	50886	48786	47772	52419	50069	373	364	331	342	316	345.2	0	0	0	0	0	0		1317	31136	31815	32103	32291	32291	31927.2	1240	1383	1336	1336	1366	1332.2	201	200	133	133	144	162.2
1318	50678	51079	48979	47918	52604	50251.6	372	363	342	340	322	347.8	0	0	0	0	0	0		1318	31219	31938	32207	32390	32390	32028.8	1235	1395	1341	1341	1366	1335.6	201	202	135	135	144	163.4
1319	50848	51285	49149	48069	52786	50427.4	383	360	341	348	322	350.8	0	0	0	0	0	0		1319	31294	32063	32325	32491	32491	32132.8	1229	1407	1359	1359	1366	1344	203	205	136	136	144	164.8
1320	51049	51493	49327	48231	52997	50619.4	381	374	341	351	327	354.8	0	0	0	0	0	0		1320	31392	32163	32424	32602	32602	32236.6	1230	1401	1370	1370	1370	1348.2	205	204	135	135	144	164.6
1321	51237	51699	49528	48412	53204	50816	384	382	342	351	333	358.4	0	0	0	0	0	0		1321	31482	32266	32527	32698	32698	32334.2	1232	1394	1376	1376	1385	1352.6	207	204	138	138	147	166.8
1322	51437	51874	49724	48627	53404	51013.2	385	386	354	357	351	366.6	0	0	0	0	0	0		1322	31555	32362	32615	32801	32801	32426.8	1226	1395	1377	1377	1387	1352.4	207	205	140	140	147	167.8
1323	51621	52081	49923	48812	53608	51209	384	395	360	361	348	369.6	0	0	0	0	0	0		1323	31659	32477	32711	32935	32935	32543.4	1232	1403	1381	1381	1400	1359.4	206	205	140	140	147	167.6
1324	51804	52294	50105	49007	53804	51402.8	382	392	365	359	342	368	0	0	0	0	0	0		1324	31759	32593	32827	33045	33045	32653.8	1233	1414	1377	1377	1417	1363.6	205	207	140	140	149	168.2
1325	52019	52515	50279	49198	53984	51599	382	394	366	365	344	370.2	0	0	0	0	0	0		1325	31876	32715	32939	33180	33180	32778	1240	1423	1375	1375	1437	1370	206	207	142	142	149	169.2
1326	52218	52684	50468	49382	54163	51783	390	391	361	371	342	371	0	0	0	0	0	0		1326	31982	32815	33045	33296	33296	32886.8	1242	1431	1370	1370	1444	1371.4	207	207	142	142	151	169.8
1327	52414	52871	50664	49566	54371	51977.2	391	404	361	373	342	374.2	0	0	0	0	0	0		1327	32075	32906	33148	33409	33409	32989.4	1253	1431	1374	1374	1447	1375.8	212	207	144	144	151	171.6
1328	52612	53095	50848	49730	54554	52167.8	384	403	368	374	342	374.2	0	0	0	0	0	0		1328	32162	33027	33258	33526	33526	33099.8	1250	1438	1373	1373	1446	1376	212	209	145	145	151	172.4
1329	52835	53277	51032	49905	54734	52356.6	400	402	368	373	342	377	0	0	0	0	0	0		1329	32268	33119	33363	33644	33644	33207.6	1252	1432	1369	1369	1440	1372.4	212	209	145	145	151	172.4
1330	53035	53488	51198	50089	54942	52550.4	398	397	374	376	347	378.4	0	0	0	0	0	0		1330	32370	33240	33460	33755	33755	33316	1255	1443	1369	1369	1458	1378.8	213	209	144	144	151	172.2
1331	53213	53682	51350	50256	55155	52731.2	402	398	372	370	344	377.2	0	0	0	0	0	0		1331	32471	33335	33565	33847	33847	33413	1251	1445	1368	1368	1452	1376.8	214	208	145	145	151	172.6
1332	53428	53866	51540	50446	55344	52924.8	409	393	373	370	348	378.6	0	0	0	0	0	0		1332	32557	33433	33677	33933	33933	33506.6	1254	1448	1366	1366	1458	1378.4	215	208	145	145	151	172.8
1333	53603	54073	51732	50651	55568	53125.4	424	403	373	366	356	384.4	0	0	0	0	0	0		1333	32643	33531	33802	34058	34058	33618.4	1258	1455	1370	1370	1476	1385.8	215	210	145	145	155	174
1334	53826	54262	51935	50836	55763	53324.4	428	401	373	365	362	385.8	0	0	0	0	0	0		1334	32744	33646	33908	34161	34161	33724	1259	1464	1384	1384	1483	1394.8	215	212	145	145	156	174.6
1335	54032	54464	52140	50985	55984	53521	426	404	379	363	360	386.4	0	0	0	0	0	0		1335	32858	33765	34026	34276	34276	33840.2	1278	1469	1382	1382	1492	1400.6	215	211	145	145	156	174.4
1336	54238	54685	52325	51174	56144	53713.2	437	405	378	369	356	389	0	0	0	0	0	0		1336	32966	33895	34130	34367	34367	33945	1273	1474	1386	1386	1487	1401.2	215	210	145	145	156	174.2
1337	54440	54876	52504	51360	56352	53906.4	435	405	380	370	355	389	0	0	0	0	0	0		1337	33063	34012	34268	34488	34488	34063.8	1266	1483	1391	1391	1491	1404.4	215	210	147	147	156	175
1338	54638	55091	52696	51562	56552	54107.8	438	410	388	378	351	393	0	0	0	0	0	0		1338	33166	34127	34370	34631	34631	34185	1272	1482	1401	1401	1495	1410.2	217	214	150	150	157	177.6
1339	54806	55294	52886	51742	56747	54295	436	405	394	377	349	392.2	0	0	0	0	0	0		1339	33293	34241	34484	34759	34759	34307.2	1277	1486	1408	1408	1502	1416.2	217	215	150	150	158	178
1340	55021	55485	53094	51913	56974	54497.4	431	408	395	378	358	394	0	0	0	0	0	0		1340	33413	34332	34589	34861	34861	34411.2	1294	1489	1411	1411	1508	1422.6	217	215	150	150	159	178.2
1341	55207	55696	53296	52105	57181	54697	431	405	395	379	359	393.8	0	0	0	0	0	0		1341	33509	34448	34701	34971	34971	34520	1289	1494	1408	1408	1518	1423.4	216	216	151	151	159	178.6
1342	55390	55901	53495	52286	57388	54892	431	407	399	385	359	396.2	0	0	0	0	0	0		1342	33605	34583	34802	35113	35113	34643.2	1292	1496	1403	1403	1527	1424.2	216	215	151	151	162	179
1343	55573	56122	53719	52481	57587	55096.4	440	408	402	383	356	397.8	0	0	0	0	0	0		1343	33714	34705	34900	35229	35229	34755.4	1294	1496	1409	1409	1539	1429.4	216	217	151	151	162	179.4
1344	55805	56319	53913	52654	57807	55299.6	441	410	404	387	362	400.8	0	0	0	0	0	0		1344	33847	34816	35008	35332	35332	34867	1311	1510	1405	1405	1537	1433.6	221	219	150	150	163	180.6
1345	56034	56507	54104	52839	58007	55498.2	443	408	409	393	366	403.8	0	0	0	0	0	0		1345	33952	34938	35110	35457	35457	34982.8	1310	1512	1412	1412	1541	1437.4	223	219	150	150	163	181
1346	56211	56722	54285	53059	58249	55705.2	443	412	402	395	374	405.2	0	0	0	0	0	0		1346	34081	35054	35233	35586	35586	35108	1343	1517	1412	1412	1541	1445	227	221	150	150	162	182
1347	56420	56921	54526	53250	58470	55917.4	442	408	408	403	376	407.4	0	0	0	0	0	0		1347	34170	35161	35342	35707	35707	35217.4	1343	1511	1413	1413	1545	1445	230	221	150	150	161	182.4
1348	56617	57123	54727	53445	58675	56117.4	444	408	402	402	372	405.6	0	0	0	0	0	0		1348	34269	35285	35462	35820	35820	35331.2	1344	1523	1408	1408	1549	1446.4	232	225	151	151	163	184.4
1349	56821	57331	54940	53648	58883	56324.6	444	407	399	403	368	404.2	0	0	0	0	0	0		1349	34395	35396	35597	35933	35933	35450.8	1352	1526	1421	1421	1557	1455.4	234	227	152	152	164	185.8
1350	57025	57546	55159	53835	59092	56531.4	435	411	401	405	368	404	0	0	0	0	0	0		1350	34501	35515	35693	36041	36041	35558.2	1365	1527	1434	1434	1564	1464.8	234	228	152	152	162	185.6
1351	57246	57743	55370	54019	59316	56738.8	439	405	392	398	365	399.8	0	0	0	0	0	0		1351	34626	35649	35806	36155	36155	35678.2	1367	1526	1437	1437	1570	1467.4	236	228	153	153	161	186.2
1352	57473	57979	55567	54218	59587	56964.8	436	414	392	395	373	402	0	0	0	0	0	0		1352	34741	35765	35914	36278	36278	35795.2	1370	1532	1445	1445	1581	1474.6	235	228	152	152	161	185.6
1353	57684	58189	55761	54395	59798	57165.4	439	422	396	392	367	403.2	0	0	0	0	0	0		1353	34827	35892	36053	36417	36417	35921.2	1373	1543	1474	1474	1603	1493.4	236	228	152	152	162	186
1354	57907	58428	55975	54582	60024	57383.2	443	425	401	389	368	405.2	0	0	0	0	0	0		1354	34964	35990	36175	36551	36551	36046.2	1381	1534	1480	1480	1617	1498.4	235	229	152	152	162	186
1355	58100	58657	56182	54779	60257	57595	441	430	400	392	373	407.2	0	0	0	0	0	0		1355	35066	36106	36280	36680	36680	36162.4	1381	1528	1479	1479	1620	1497.4	235	230	152	152	161	186
1356	58312	58860	56371	54978	60466	57797.4	444	428	397	388	375	406.4	0	0	0	0	0	0		1356	35167	36224	36401	36806	36806	36280.8	1379	1540	1488	1488	1630	1505	235	231	153	153	162	186.8
1357	58533	59059	56560	55192	60666	58002	442	428	397	392	379	407.6	0	0	0	0	0	0		1357	35281	36346	36515	36920	36920	36396.4	1383	1539	1496	1496	1635	1509.8	236	232	152	152	166	187.6
1358	58722	59301	56778	55423	60901	58225	444	436	399	387	378	408.8	0	0	0	0	0	0		1358	35408	36462	36620	37037	37037	36512.8	1384	1552	1505	1505	1645	1518.2	241	232	153	153	166	189
1359	58977	59496	56998	55617	61120	58441.6	446	433	398	391	377	409	0	0	0	0	0	0		1359	35522	36596	36722	37149	37149	36627.6	1389	1550	1502	1502	1665	1521.6	240	231	153	153	169	189.2
1360	59165	59692	57244	55790	61343	58646.8	444	433	404	394	382	411.4	0	0	0	0	0	0		1360	35651	36743	36817	37262	37262	36747	1393	1569	1509	1509	1671	1530.2	241	231	155	155	172	190.8
1361	59385	59945	57457	56007	61572	58873.2	445	436	412	405	376	414.8	0	0	0	0	0	0		1361	35763	36868	36952	37400	37400	36876.6	1409	1577	1520	1520	1676	1540.4	244	231	158	158	172	192.6
1362	59642	60150	57662	56211	61809	59094.8	446	433	413	410	377	415.8	0	0	0	0	0	0		1362	35872	36989	37080	37517	37517	36995	1414	1585	1523	1523	1684	1545.8	244	231	158	158	172	192.6
1363	59870	60402	57888	56413	62029	59320.4	445	440	415	407	377	416.8	0	0	0	0	0	0		1363	35986	37136	37201	37659	37659	37128.2	1417	1594	1521	1521	1688	1548.2	246	231	157	157	174	193
1364	60088	60612	58096	56627	62233	59531.2	453	439	424	403	373	418.4	0	0	0	0	0	0		1364	36117	37247	37334	37787	37787	37254.4	1430	1598	1527	1527	1692	1554.8	248	231	156	156	175	193.2
1365	60296	60815	58327	56867	62489	59758.8	459	439	433	413	378	424.4	0	0	0	0	0	0		1365	36233	37381	37440	37929	37929	37382.4	1426	1601	1519	1519	1704	1553.8	251	229	156	156	176	193.6
1366	60509	61037	58556	57094	62740	59987.2	463	432	436	415	379	425	0	0	0	0	0	0		1366	36355	37538	37569	38052	38052	37513.2	1433	1600	1527	1527	1710	1559.4	253	231	159	159	177	195.8
1367	60741	61267	58761	57311	62954	60206.8	460	430	444	415	385	426.8	0	0	0	0	0	0		1367	36478	37668	37703	38176	38176	37640.2	1431	1606	1537	1537	1708	1563.8	252	230	160	160	179	196.2
1368	60954	61506	58995	57516	63234	60441	460	427	454	416	392	429.8	0	0	0	0	0	0		1368	36583	37793	37833	38315	38315	37767.8	1438	1617	1541	1541	1727	1572.8	253	230	160	160	181	196.8
1369	61184	61746	59227	57728	63469	60670.8	478	428	457	418	394	435	0	0	0	0	0	0		1369	36704	37954	37962	38430	38430	37896	1451	1626	1549	1549	1731	1581.2	254	235	161	161	181	198.4
1370	61396	61974	59447	57931	63705	60890.6	481	426	453	412	401	434.6	0	0	0	0	0	0		1370	36824	38063	38057	38542	38542	38005.6	1452	1627	1553	1553	1737	1584.4	254	236	161	161	181	198.6
1371	61618	62214	59680	58141	63981	61126.8	483	428	448	412	413	436.8	0	0	0	0	0	0		1371	36947	38194	38178	38691	38691	38140.2	1463	1639	1553	1553	1746	1590.8	254	241	161	161	183	200
1372	61866	62420	59914	58353	64245	61359.6	483	424	446	422	418	438.6	0	0	0	0	0	0		1372	37082	38330	38320	38813	38813	38271.6	1472	1655	1562	1562	1746	1599.4	257	246	163	163	182	202.2
1373	62131	62633	60142	58567	64491	61592.8	484	430	446	425	423	441.6	0	0	0	0	0	0		1373	37214	38447	38445	38922	38922	38390	1475	1662	1571	1571	1747	1605.2	258	247	163	163	182	202.6
1374	62398	62861	60347	58772	64739	61823.4	486	441	447	425	423	444.4	0	0	0	0	0	0		1374	37360	38569	38588	39065	39065	38529.4	1466	1673	1580	1580	1750	1609.8	256	253	162	162	185	203.6
1375	62660	63104	60596	58976	64985	62064.2	483	441	449	420	442	447	0	0	0	0	0	0		1375	37489	38714	38736	39192	39192	38664.6	1475	1681	1584	1584	1762	1617.2	257	252	163	163	185	204
1376	62886	63346	60825	59180	65257	62298.8	488	446	451	418	447	450	0	0	0	0	0	0		1376	37630	38866	38859	39316	39316	38797.4	1486	1693	1597	1597	1771	1628.8	256	255	166	166	186	205.8
1377	63127	63579	61056	59451	65535	62549.6	496	452	455	425	452	456	0	0	0	0	0	0		1377	37771	38985	38970	39451	39451	38925.6	1495	1703	1599	1599	1785	1636.2	257	255	166	166	188	206.4
1378	63352	63819	61290	59711	65781	62790.6	484	456	454	431	445	454	0	0	0	0	0	0		1378	37896	39124	39107	39558	39558	39048.6	1514	1714	1606	1606	1789	1645.8	257	255	166	166	188	206.4
1379	63569	64034	61503	59923	66022	63010.2	483	460	451	429	447	454	0	0	0	0	0	0		1379	38008	39268	39213	39678	39678	39169	1515	1714	1608	1608	1789	1646.8	256	255	166	166	190	206.6
1380	63809	64284	61738	60163	66259	63250.6	486	466	452	429	442	455	0	0	0	0	0	0		1380	38140	39412	39347	39813	39813	39305	1531	1713	1619	1619	1799	1656.2	255	255	165	165	191	206.2
1381	64013	64504	61982	60372	66505	63475.2	483	472	454	430	444	456.6	0	0	0	0	0	0		1381	38256	39535	39476	39960	39960	39437.4	1532	1727	1646	1646	1809	1672	256	259	165	165	193	207.6
1382	64269	64743	62234	60614	66765	63725	493	472	456	429	450	460	0	0	0	0	0	0		1382	38365	39682	39582	40102	40102	39566.6	1532	1749	1650	1650	1803	1676.8	255	263	166	166	195	209
1383	64508	64992	62485	60822	67014	63964.2	487	464	457	438	452	459.6	0	0	0	0	0	0		1383	38504	39843	39708	40213	40213	39696.2	1546	1767	1657	1657	1801	1685.6	255	265	166	166	198	210
1384	64737	65219	62702	61088	67275	64204.2	492	461	461	438	451	460.6	0	0	0	0	0	0		1384	38650	39987	39847	40338	40338	39832	1548	1769	1661	1661	1806	1689	254	264	166	166	199	209.8
1385	64980	65473	62946	61317	67514	64446	497	457	463	438	450	461	0	0	0	0	0	0		1385	38781	40129	39992	40485	40485	39974.4	1549	1795	1663	1663	1817	1697.4	254	264	165	165	200	209.6
1386	65198	65728	63204	61546	67814	64698	500	457	473	436	454	464	0	0	0	0	0	0		1386	38906	40264	40132	40613	40613	40105.6	1549	1802	1662	1662	1810	1697	257	263	165	165	198	209.6
1387	65491	65975	63415	61759	68079	64943.8	503	460	468	436	457	464.8	0	0	0	0	0	0		1387	38997	40412	40270	40766	40766	40242.2	1556	1809	1677	1677	1814	1706.6	258	264	166	166	198	210.4
1388	65731	66217	63656	61998	68335	65187.4	504	456	467	442	461	466	0	0	0	0	0	0		1388	39137	40524	40422	40904	40904	40378.2	1562	1810	1677	1677	1821	1709.4	258	263	167	167	201	211.2
1389	65982	66464	63885	62263	68577	65434.2	503	458	478	438	455	466.4	0	0	0	0	0	0		1389	39304	40656	40564	41018	41018	40512	1582	1799	1683	1683	1821	1713.6	260	263	168	168	204	212.6
1390	66233	66710	64124	62481	68850	65679.6	515	465	470	435	460	469	0	0	0	0	0	0		1390	39433	40790	40688	41155	41155	40644.2	1590	1804	1688	1688	1830	1720	261	262	167	167	206	212.6
1391	66490	66971	64378	62717	69098	65930.8	514	468	474	448	452	471.2	0	0	0	0	0	0		1391	39587	40921	40822	41286	41286	40780.4	1607	1808	1698	1698	1831	1728.4	263	262	166	166	206	212.6
1392	66744	67212	64642	62956	69328	66176.4	514	479	474	447	449	472.6	0	0	0	0	0	0		1392	39719	41045	40965	41417	41417	40912.6	1623	1805	1701	1701	1833	1732.6	263	264	166	166	206	213
1393	67001	67444	64894	63227	69601	66433.4	517	483	471	448	452	474.2	0	0	0	0	0	0		1393	39842	41185	41114	41528	41528	41039.4	1624	1817	1703	1703	1838	1737	265	270	167	167	207	215.2
1394	67291	67689	65139	63466	69870	66691	512	484	479	453	453	476.2	0	0	0	0	0	0		1394	39973	41341	41251	41663	41663	41178.2	1638	1823	1701	1701	1843	1741.2	266	268	168	168	210	216
1395	67578	67916	65401	63723	70138	66951.2	515	478	471	457	457	475.6	0	0	0	0	0	0		1395	40127	41482	41414	41781	41781	41317	1649	1829	1717	1717	1845	1751.4	266	270	168	168	210	216.4
1396	67814	68180	65628	63951	70406	67195.8	519	485	472	454	462	478.4	0	0	0	0	0	0		1396	40283	41603	41566	41925	41925	41460.4	1654	1830	1719	1719	1858	1756	266	270	169	169	208	216.4
1397	68074	68424	65869	64195	70650	67442.4	526	489	471	448	468	480.4	0	0	0	0	0	0		1397	40427	41732	41713	42030	42030	41586.4	1676	1826	1738	1738	1853	1766.2	268	272	168	168	207	216.6
1398	68350	68669	66149	64451	70910	67705.8	536	485	462	459	481	484.6	0	0	0	0	0	0		1398	40550	41882	41847	42174	42174	41725.4	1673	1824	1741	1741	1857	1767.2	269	273	168	168	208	217.2
1399	68596	68924	66368	64722	71149	67951.8	532	484	461	460	482	483.8	0	0	0	0	0	0		1399	40697	42034	41989	42293	42293	41861.2	1690	1822	1730	1730	1873	1769	269	272	167	167	209	216.8
1400	68854	69169	66623	64960	71417	68204.6	530	477	461	463	486	483.4	0	0	0	0	0	0		1400	40823	42175	42118	42445	42445	42001.2	1691	1835	1741	1741	1880	1777.6	268	273	169	169	211	218
1401	69126	69421	66889	65211	71720	68473.4	536	480	480	466	489	490.2	0	0	0	0	0	0		1401	40967	42313	42256	42581	42581	42139.6	1694	1826	1745	1745	1889	1779.8	272	273	170	170	215	220
1402	69402	69657	67143	65481	71997	68736	538	480	490	480	485	494.6	0	0	0	0	0	0		1402	41081	42470	42382	42717	42717	42273.4	1694	1829	1748	1748	1903	1784.4	273	275	169	169	215	220.2
1403	69645	69898	67392	65719	72271	68985	541	477	492	483	488	496.2	0	0	0	0	0	0		1403	41219	42602	42534	42831	42831	42403.4	1693	1840	1749	1749	1901	1786.4	274	277	169	169	215	220.8
1404	69872	70137	67667	65946	72572	69238.8	538	474	499	482	478	494.2	0	0	0	0	0	0		1404	41349	42736	42660	42986	42986	42543.4	1690	1836	1755	1755	1909	1789	277	276	171	171	216	222.2
1405	70117	70371	67903	66195	72871	69491.4	537	476	490	483	479	493	0	0	0	0	0	0		1405	41487	42900	42813	43133	43133	42693.2	1701	1850	1778	1778	1916	1804.6	276	278	171	171	216	222.4
1406	70369	70664	68159	66438	73150	69756	531	481	496	484	479	494.2	0	0	0	0	0	0		1406	41639	43033	42979	43265	43265	42836.2	1712	1863	1786	1786	1917	1812.8	275	279	173	173	216	223.2
1407	70639	70927	68398	66693	73417	70014.8	537	481	497	490	470	495	0	0	0	0	0	0		1407	41793	43185	43126	43417	43417	42987.6	1712	1878	1791	1791	1926	1819.6	275	279	173	173	216	223.2
1408	70961	71213	68645	66941	73691	70290.2	543	491	496	493	468	498.2	0	0	0	0	0	0		1408	41952	43333	43292	43544	43544	43133	1733	1881	1807	1807	1945	1834.6	276	279	173	173	217	223.6
1409	71229	71454	68910	67200	73973	70553.2	545	494	500	486	478	500.6	0	0	0	0	0	0		1409	42085	43477	43450	43666	43666	43268.8	1721	1884	1815	1815	1952	1837.4	275	277	175	175	219	224.2
1410	71510	71695	69177	67470	74206	70811.6	549	492	496	484	481	500.4	0	0	0	0	0	0		1410	42246	43620	43591	43788	43788	43406.6	1738	1886	1823	1823	1951	1844.2	279	277	179	179	220	226.8
1411	71767	71951	69434	67733	74472	71071.4	547	504	509	475	486	504.2	0	0	0	0	0	0		1411	42385	43762	43752	43922	43922	43548.6	1756	1888	1831	1831	1954	1852	282	279	181	181	222	229
1412	72025	72224	69725	67967	74762	71340.6	543	509	519	480	483	506.8	0	0	0	0	0	0		1412	42545	43893	43900	44058	44058	43690.8	1769	1893	1841	1841	1965	1861.8	283	279	182	182	221	229.4
1413	72291	72508	70002	68245	75053	71619.8	548	508	518	492	482	509.6	0	0	0	0	0	0		1413	42703	44016	44017	44191	44191	43823.6	1772	1896	1839	1839	1980	1865.2	285	282	184	184	221	231.2
1414	72546	72758	70234	68506	75364	71881.6	548	510	524	493	480	511	0	0	0	0	0	0		1414	42834	44153	44168	44352	44352	43971.8	1775	1896	1838	1838	1992	1867.8	284	283	188	188	221	232.8
1415	72811	73017	70478	68788	75646	72148	550	513	511	492	488	510.8	0	0	0	0	0	0		1415	42999	44292	44307	44496	44496	44118	1775	1896	1843	1843	1996	1870.6	286	285	190	190	223	234.8
1416	73055	73291	70724	69081	75950	72420.2	541	513	512	495	495	511.2	0	0	0	0	0	0		1416	43140	44435	44456	44634	44634	44259.8	1780	1903	1835	1835	1998	1870.2	288	290	192	192	222	236.8
1417	73317	73551	71000	69358	76235	72692.2	538	511	514	498	499	512	0	0	0	0	0	0		1417	43268	44549	44616	44787	44787	44401.4	1783	1908	1838	1838	2019	1877.2	291	290	194	194	222	238.2
1418	73568	73797	71261	69614	76519	72951.8	539	515	507	502	505	513.6	0	0	0	0	0	0		1418	43436	44682	44747	44900	44900	44533	1792	1898	1844	1844	2017	1879	290	294	194	194	223	239
1419	73866	74079	71539	69894	76817	73239	543	513	526	501	501	516.8	0	0	0	0	0	0		1419	43600	44808	44904	45028	45028	44673.6	1802	1902	1855	1855	2008	1884.4	292	296	196	196	223	240.6
1420	74149	74351	71832	70152	77098	73516.4	553	511	529	515	505	522.6	0	0	0	0	0	0		1420	43758	44956	45042	45191	45191	44827.6	1828	1911	1859	1859	2021	1895.6	295	296	195	195	222	240.6
1421	74439	74622	72076	70431	77406	73794.8	548	512	525	528	511	524.8	0	0	0	0	0	0		1421	43913	45108	45201	45330	45330	44976.4	1839	1907	1858	1858	2034	1899.2	295	296	198	198	224	242.2
1422	74753	74896	72371	70664	77671	74071	550	523	525	525	513	527.2	0	0	0	0	0	0		1422	44067	45246	45350	45494	45494	45130.2	1842	1903	1858	1858	2036	1899.4	297	299	198	198	225	243.4
1423	75008	75186	72620	70962	77958	74346.8	546	519	530	543	505	528.6	0	0	0	0	0	0		1423	44201	45388	45516	45653	45653	45282.2	1854	1904	1864	1864	2045	1906.2	297	299	198	198	226	243.6
1424	75304	75466	72906	71238	78245	74631.8	544	522	537	548	504	531	0	0	0	0	0	0		1424	44354	45516	45651	45801	45801	45424.6	1866	1905	1863	1863	2050	1909.4	297	299	200	200	228	244.8
1425	75579	75772	73167	71488	78563	74913.8	550	517	534	548	507	531.2	0	0	0	0	0	0		1425	44505	45647	45789	45945	45945	45566.2	1871	1911	1874	1874	2048	1915.6	300	303	204	204	228	247.8
1426	75872	76093	73427	71797	78869	75211.6	550	517	537	543	511	531.6	0	0	0	0	0	0		1426	44669	45787	45933	46080	46080	45709.8	1874	1905	1894	1894	2057	1924.8	300	303	204	204	228	247.8
1427	76180	76386	73711	72057	79166	75500	561	521	539	541	512	534.8	0	0	0	0	0	0		1427	44825	45926	46094	46241	46241	45865.4	1880	1920	1909	1909	2067	1937	301	303	204	204	232	248.8
1428	76455	76662	73959	72326	79500	75780.4	561	529	540	539	512	536.2	0	0	0	0	0	0		1428	44988	46071	46245	46383	46383	46014	1903	1925	1910	1910	2069	1943.4	302	304	207	207	232	250.4
1429	76719	76960	74232	72606	79790	76061.4	561	528	543	536	509	535.4	0	0	0	0	0	0		1429	45130	46226	46365	46534	46534	46157.8	1920	1924	1910	1910	2065	1945.8	302	305	209	209	229	250.8
1430	77001	77274	74506	72883	80060	76344.8	563	530	555	540	509	539.4	0	0	0	0	0	0		1430	45274	46389	46535	46681	46681	46312	1932	1927	1916	1916	2070	1952.2	302	311	209	209	229	252
1431	77300	77555	74767	73163	80336	76624.2	560	546	553	550	513	544.4	0	0	0	0	0	0		1431	45425	46535	46692	46833	46833	46463.6	1935	1926	1923	1923	2073	1956	301	313	212	212	229	253.4
1432	77595	77794	75046	73427	80619	76896.2	571	550	557	546	515	547.8	0	0	0	0	0	0		1432	45583	46685	46833	46997	46997	46619	1946	1943	1924	1924	2094	1966.2	303	311	209	209	229	252.2
1433	77905	78107	75307	73740	80915	77194.8	587	563	552	560	511	554.6	0	0	0	0	0	0		1433	45741	46823	46977	47144	47144	46765.8	1951	1950	1914	1914	2096	1965	302	314	210	210	230	253.2
1434	78199	78389	75555	74022	81229	77478.8	583	558	558	555	511	553	0	0	0	0	0	0		1434	45890	46996	47109	47314	47314	46924.6	1952	1956	1918	1918	2107	1970.2	304	316	211	211	229	254.2
1435	78482	78661	75818	74315	81532	77761.6	589	557	561	550	521	555.6	0	0	0	0	0	0		1435	46050	47146	47271	47470	47470	47081.4	1966	1961	1917	1917	2129	1978	306	320	211	211	229	255.4
1436	78748	78943	76119	74622	81797	78045.8	583	564	570	553	519	557.8	0	0	0	0	0	0		1436	46199	47298	47434	47632	47632	47239	1966	1968	1917	1917	2136	1980.8	304	320	211	211	231	255.4
1437	79030	79236	76411	74908	82087	78334.4	586	580	564	544	539	562.6	0	0	0	0	0	0		1437	46336	47453	47602	47786	47786	47392.6	1967	1979	1932	1932	2144	1990.8	303	320	211	211	231	255.2
1438	79310	79499	76714	75184	82416	78624.6	591	577	572	539	534	562.6	0	0	0	0	0	0		1438	46505	47653	47736	47935	47935	47552.8	1975	1983	1943	1943	2145	1997.8	306	321	213	213	231	256.8
1439	79609	79821	77020	75438	82709	78919.4	598	582	564	536	530	562	0	0	0	0	0	0		1439	46650	47794	47907	48076	48076	47700.6	1975	1992	1944	1944	2144	1999.8	308	322	215	215	234	258.8
1440	79948	80164	77303	75741	83034	79238	601	579	573	536	547	567.2	0	0	0	0	0	0		1440	46773	47973	48042	48243	48243	47854.8	1975	2011	1948	1948	2154	2007.2	308	323	218	218	238	261
1441	80233	80490	77585	76022	83358	79537.6	600	584	569	542	552	569.4	0	0	0	0	0	0		1441	46949	48105	48224	48406	48406	48018	1989	2016	1962	1962	2157	2017.2	311	325	222	222	240	264
1442	80539	80818	77848	76307	83652	79832.8	601	580	575	538	552	569.2	0	0	0	0	0	0		1442	47125	48236	48396	48579	48579	48183	2004	2020	1979	1979	2175	2031.4	315	325	221	221	243	265
1443	80841	81128	78134	76597	83969	80133.8	615	591	574	549	556	577	0	0	0	0	0	0		1443	47282	48408	48549	48743	48743	48345	2008	2041	1979	1979	2180	2037.4	315	329	223	223	245	267
1444	81123	81449	78396	76881	84292	80428.2	610	588	575	547	551	574.2	0	0	0	0	0	0		1444	47441	48561	48678	48885	48885	48490	2015	2042	1990	1990	2180	2043.4	319	329	224	224	244	268
1445	81437	81758	78689	77160	84601	80729	616	583	576	539	553	573.4	0	0	0	0	0	0		1445	47586	48730	48850	49020	49020	48641.2	2015	2049	1996	1996	2173	2045.8	319	331	225	225	243	268.6
1446	81765	82049	78994	77427	84914	81029.8	616	579	572	546	550	572.6	0	0	0	0	0	0		1446	47779	48890	48997	49165	49165	48799.2	2047	2053	2004	2004	2166	2054.8	319	331	225	225	242	268.4
1447	82032	82360	79276	77726	85227	81324.2	612	582	570	548	560	574.4	0	0	0	0	0	0		1447	47942	49044	49163	49319	49319	48957.4	2048	2049	2019	2019	2168	2060.6	320	333	224	224	243	268.8
1448	82344	82685	79557	78052	85527	81633	618	591	566	547	560	576.4	0	0	0	0	0	0		1448	48092	49210	49354	49500	49500	49131.2	2055	2058	2042	2042	2187	2076.8	319	334	225	225	245	269.6
1449	82626	83015	79835	78312	85822	81922	613	597	569	550	552	576.2	0	0	0	0	0	0		1449	48260	49367	49512	49657	49657	49290.6	2052	2070	2042	2042	2184	2078	320	334	226	226	245	270.2
1450	82934	83337	80133	78618	86141	82232.6	623	597	573	546	554	578.6	0	0	0	0	0	0		1450	48428	49527	49699	49847	49847	49469.6	2057	2084	2051	2051	2187	2086	322	336	228	228	245	271.8
1451	83251	83616	80416	78915	86487	82537	622	593	583	553	553	580.8	0	0	0	0	0	0		1451	48616	49692	49837	50011	50011	49633.4	2068	2088	2065	2065	2199	2097	323	341	228	228	246	273.2
1452	83552	83932	80712	79203	86827	82845.2	616	600	574	554	555	579.8	0	0	0	0	0	0		1452	48769	49874	50019	50216	50216	49818.8	2072	2100	2072	2072	2221	2107.4	326	343	227	227	247	274
1453	83878	84250	81017	79490	87171	83161.2	612	610	574	572	561	585.8	0	0	0	0	0	0		1453	48930	50046	50194	50370	50370	49982	2090	2107	2079	2079	2225	2116	328	344	229	229	246	275.2
1454	84183	84579	81324	79806	87475	83473.4	611	615	579	582	558	589	0	0	0	0	0	0		1454	49065	50233	50376	50537	50537	50149.6	2092	2121	2087	2087	2236	2124.6	328	351	232	232	250	278.6
1455	84491	84930	81636	80118	87807	83796.4	618	618	599	583	560	595.6	0	0	0	0	0	0		1455	49234	50405	50538	50691	50691	50311.8	2092	2140	2099	2099	2235	2133	331	355	234	234	254	281.6
1456	84807	85260	81929	80412	88141	84109.8	615	617	605	585	572	598.8	0	0	0	0	0	0		1456	49393	50567	50725	50851	50851	50477.4	2100	2153	2108	2108	2242	2142.2	334	358	235	235	256	283.6
1457	85113	85609	82198	80693	88478	84418.2	613	623	611	589	580	603.2	0	0	0	0	0	0		1457	49532	50706	50890	51028	51028	50636.8	2101	2164	2107	2107	2264	2148.6	334	358	235	235	257	283.8
1458	85430	85952	82525	80998	88774	84735.8	619	643	622	597	582	612.6	0	0	0	0	0	0		1458	49687	50857	51071	51200	51200	50803	2102	2164	2108	2108	2259	2148.2	339	361	235	235	257	285.4
1459	85728	86275	82855	81292	89087	85047.4	620	642	620	607	581	614	0	0	0	0	0	0		1459	49833	51013	51211	51387	51387	50966.2	2098	2167	2101	2101	2271	2147.6	339	365	234	234	257	285.8
1460	86035	86617	83158	81603	89405	85363.6	635	649	629	600	583	619.2	0	0	0	0	0	0		1460	49970	51162	51368	51578	51578	51131.2	2113	2169	2102	2102	2283	2153.8	341	365	234	234	257	286.2
1461	86348	86958	83445	81928	89778	85691.4	636	648	634	607	585	622	0	0	0	0	0	0		1461	50157	51316	51536	51756	51756	51304.2	2127	2167	2111	2111	2304	2164	341	366	234	234	257	286.4
1462	86681	87275	83751	82220	90128	86011	633	647	639	603	592	622.8	0	0	0	0	0	0		1462	50344	51472	51696	51920	51920	51470.4	2137	2156	2122	2122	2310	2169.4	344	366	233	233	258	286.8
1463	87028	87604	84069	82542	90413	86331.2	643	646	636	615	594	626.8	0	0	0	0	0	0		1463	50511	51636	51883	52100	52100	51646	2130	2157	2137	2137	2307	2173.6	343	365	233	233	258	286.4
1464	87384	87953	84363	82840	90753	86658.6	653	650	623	617	592	627	0	0	0	0	0	0		1464	50715	51789	52061	52239	52239	51808.6	2131	2171	2154	2154	2307	2183.4	347	370	235	235	255	288.4
1465	87727	88290	84659	83148	91131	86991	647	652	622	619	597	627.4	0	0	0	0	0	0		1465	50894	51963	52233	52421	52421	51986.4	2141	2177	2161	2161	2317	2191.4	348	370	235	235	254	288.4
1466	88067	88635	85018	83431	91460	87322.2	648	651	629	617	592	627.4	0	0	0	0	0	0		1466	51065	52112	52401	52600	52600	52155.6	2156	2188	2174	2174	2327	2203.8	350	372	236	236	254	289.6
1467	88450	88964	85330	83712	91812	87653.6	654	650	631	609	598	628.4	0	0	0	0	0	0		1467	51237	52306	52580	52792	52792	52341.4	2175	2213	2167	2167	2332	2210.8	350	374	237	237	259	291.4
1468	88792	89299	85685	84035	92166	87995.4	653	646	629	608	604	628	0	0	0	0	0	0		1468	51370	52456	52749	52964	52964	52500.6	2192	2232	2176	2176	2328	2220.8	351	373	237	237	260	291.6
1469	89144	89626	86007	84334	92515	88325.2	652	649	626	613	616	631.2	0	0	0	0	0	0		1469	51513	52659	52896	53150	53150	52673.6	2208	2260	2180	2180	2327	2231	351	377	237	237	263	293
1470	89484	89960	86295	84631	92870	88648	661	657	624	617	621	636	0	0	0	0	0	0		1470	51689	52859	53063	53328	53328	52853.4	2214	2267	2177	2177	2339	2234.8	353	378	238	238	266	294.6
1471	89804	90283	86637	84932	93225	88976.2	663	665	625	614	626	638.6	0	0	0	0	0	0		1471	51866	53047	53238	53507	53507	53033	2230	2286	2178	2178	2351	2244.6	353	378	237	237	266	294.2
1472	90148	90602	86970	85254	93565	89307.8	670	659	630	620	641	644	0	0	0	0	0	0		1472	52040	53221	53388	53708	53708	53213	2241	2304	2184	2184	2368	2256.2	354	379	239	239	269	296
1473	90501	90949	87298	85577	93905	89646	673	672	638	633	642	651.6	0	0	0	0	0	0		1473	52229	53434	53565	53896	53896	53404	2265	2318	2195	2195	2371	2268.8	356	378	238	238	268	295.6
1474	90808	91260	87645	85868	94248	89965.8	667	669	643	637	643	651.8	0	0	0	0	0	0		1474	52396	53593	53759	54058	54058	53572.8	2272	2331	2219	2219	2389	2286	360	377	240	240	269	297.2
1475	91155	91597	87967	86175	94578	90294.4	664	670	640	641	643	651.6	0	0	0	0	0	0		1475	52567	53804	53931	54259	54259	53764	2276	2331	2219	2219	2407	2290.4	359	382	240	240	271	298.4
1476	91487	91973	88300	86514	94915	90637.8	660	664	645	654	648	654.2	0	0	0	0	0	0		1476	52718	53954	54111	54449	54449	53936.2	2282	2338	2221	2221	2402	2292.8	362	381	243	243	272	300.2
1477	91819	92301	88619	86818	95271	90965.6	664	662	658	655	646	657	0	0	0	0	0	0		1477	52878	54129	54269	54631	54631	54107.6	2287	2342	2207	2207	2425	2293.6	364	384	242	242	274	301.2
1478	92160	92658	88963	87123	95609	91302.6	661	662	659	665	644	658.2	0	0	0	0	0	0		1478	53052	54339	54444	54804	54804	54288.6	2301	2354	2212	2212	2424	2300.6	367	388	244	244	275	303.6
1479	92522	93014	89288	87424	95949	91639.4	654	652	664	677	647	658.8	0	0	0	0	0	0		1479	53225	54512	54608	54988	54988	54464.2	2311	2362	2220	2220	2427	2308	368	389	246	246	275	304.8
1480	92869	93365	89601	87709	96269	91962.6	657	650	668	682	654	662.2	0	0	0	0	0	0		1480	53421	54689	54794	55185	55185	54654.8	2318	2362	2239	2239	2435	2318.6	370	389	248	248	276	306.2
1481	93188	93725	89915	88019	96625	92294.4	649	654	678	691	657	665.8	0	0	0	0	0	0		1481	53583	54873	55006	55367	55367	54839.2	2323	2378	2257	2257	2433	2329.6	372	393	250	250	275	308
1482	93512	94076	90256	88332	97011	92637.4	663	656	676	686	660	668.2	0	0	0	0	0	0		1482	53754	55058	55197	55539	55539	55017.4	2332	2376	2272	2272	2439	2338.2	375	394	249	249	273	308
1483	93860	94441	90578	88680	97358	92983.4	664	659	679	683	652	667.4	0	0	0	0	0	0		1483	53926	55231	55389	55741	55741	55205.6	2333	2389	2274	2274	2455	2345	377	399	253	253	273	311
1484	94214	94814	90932	88992	97673	93325	662	652	688	678	655	667	0	0	0	0	0	0		1484	54101	55415	55550	55926	55926	55383.6	2337	2397	2275	2275	2472	2351.2	377	399	257	257	275	313
1485	94582	95198	91266	89315	98062	93684.6	668	655	686	674	664	669.4	0	0	0	0	0	0		1485	54282	55586	55725	56066	56066	55545	2348	2407	2287	2287	2467	2359.2	376	402	262	262	276	315.6
1486	94910	95561	91610	89633	98414	94025.6	662	660	677	675	660	666.8	0	0	0	0	0	0		1486	54433	55770	55943	56256	56256	55731.6	2343	2418	2311	2311	2470	2370.6	376	404	264	264	277	317
1487	95268	95938	91936	89965	98764	94374.2	668	665	682	668	665	669.6	0	0	0	0	0	0		1487	54583	55943	56124	56455	56455	55912	2351	2409	2318	2318	2476	2374.4	377	402	264	264	279	317.2
1488	95616	96296	92271	90315	99114	94722.4	668	676	690	673	672	675.8	0	0	0	0	0	0		1488	54745	56140	56291	56636	56636	56089.6	2365	2414	2309	2309	2479	2375.2	377	402	268	268	280	319
1489	95948	96674	92646	90614	99489	95074.2	679	689	699	671	669	681.4	0	0	0	0	0	0		1489	54924	56294	56446	56829	56829	56264.4	2354	2422	2308	2308	2493	2377	376	402	268	268	281	319
1490	96316	97044	92999	90914	99853	95425.2	685	700	692	663	666	681.2	0	0	0	0	0	0		1490	55091	56486	56613	57022	57022	56446.8	2371	2441	2332	2332	2504	2396	378	403	269	269	282	320.2
1491	96684	97423	93344	91299	100231	95796.2	689	696	698	669	665	683.4	0	0	0	0	0	0		1491	55277	56648	56817	57222	57222	56637.2	2390	2435	2350	2350	2523	2409.6	377	405	274	274	285	323
1492	97043	97807	93671	91653	100626	96160	692	698	689	673	665	683.4	0	0	0	0	0	0		1492	55443	56847	56984	57410	57410	56818.8	2397	2441	2349	2349	2526	2412.4	379	409	275	275	286	324.8
1493	97408	98158	94004	91954	100985	96501.8	703	712	695	672	668	690	0	0	0	0	0	0		1493	55616	57037	57142	57614	57614	57004.6	2408	2448	2341	2341	2537	2415	380	411	274	274	290	325.8
1494	97748	98514	94323	92286	101382	96850.6	717	706	688	678	662	690.2	0	0	0	0	0	0		1494	55751	57221	57308	57820	57820	57184	2415	2455	2339	2339	2565	2422.6	384	412	274	274	293	327.4
1495	98124	98928	94685	92618	101756	97222.2	723	712	684	677	660	691.2	0	0	0	0	0	0		1495	55920	57404	57506	58016	58016	57372.4	2428	2465	2350	2350	2569	2432.4	386	412	274	274	293	327.8
1496	98476	99284	95049	92996	102111	97583.2	708	716	689	683	659	691	0	0	0	0	0	0		1496	56055	57592	57701	58211	58211	57554	2432	2486	2348	2348	2570	2436.8	386	413	274	274	294	328.2
1497	98826	99710	95430	93336	102495	97959.4	715	721	687	678	658	691.8	0	0	0	0	0	0		1497	56245	57812	57893	58414	58414	57755.6	2444	2502	2360	2360	2566	2446.4	388	415	274	274	294	329
1498	99156	100062	95736	93669	102831	98290.8	723	719	683	677	663	693	0	0	0	0	0	0		1498	56425	58016	58077	58616	58616	57950	2455	2514	2373	2373	2585	2460	390	414	278	278	296	331.2
1499	99510	100415	96094	93978	103217	98642.8	726	712	681	682	679	696	0	0	0	0	0	0		1499	56615	58187	58276	58813	58813	58140.8	2458	2517	2366	2366	2588	2459	395	414	279	279	295	332.4
1500	99875	100792	96479	94302	103603	99010.2	729	719	681	684	684	699.4	0	0	0	0	0	0		1500	56800	58384	58467	59057	59057	58353	2462	2518	2368	2368	2616	2466.4	396	415	284	284	296	335
1501	100250	101173	96833	94630	103973	99371.8	733	726	681	678	682	700	0	0	0	0	0	0		1501	57016	58597	58621	59263	59263	58552	2483	2535	2368	2368	2642	2479.2	396	417	285	285	296	335.8
1502	100603	101534	97187	94984	104354	99732.4	725	734	678	672	691	700	0	0	0	0	0	0		1502	57188	58801	58832	59456	59456	58746.6	2504	2546	2389	2389	2651	2495.8	396	418	286	286	297	336.6
1503	100967	101905	97521	95347	104742	100096	718	724	679	679	695	699	0	0	0	0	0	0		1503	57389	58982	59018	59641	59641	58934.2	2519	2550	2407	2407	2656	2507.8	396	424	290	290	299	339.8
1504	101336	102284	97843	95699	105144	100461	713	730	672	680	691	697.2	0	0	0	0	0	0		1504	57613	59173	59181	59805	59805	59115.4	2545	2549	2405	2405	2674	2515.6	397	425	292	292	298	340.8
1505	101695	102702	98190	96040	105528	100831	726	745	669	671	702	702.6	0	0	0	0	0	0		1505	57793	59375	59353	60004	60004	59305.8	2554	2560	2397	2397	2697	2521	395	424	292	292	300	340.6
1506	102034	103100	98546	96402	105913	101199	729	750	676	669	715	707.8	0	0	0	0	0	0		1506	57967	59572	59559	60189	60189	59495.2	2557	2563	2408	2408	2699	2527	396	426	292	292	301	341.4
1507	102390	103476	98906	96760	106300	101566	725	753	675	675	714	708.4	0	0	0	0	0	0		1507	58161	59753	59738	60407	60407	59693.2	2576	2554	2409	2409	2729	2535.4	396	425	293	293	306	342.6
1508	102763	103871	99232	97139	106684	101938	723	757	671	671	723	709	0	0	0	0	0	0		1508	58347	59969	59924	60624	60624	59897.6	2583	2566	2407	2407	2761	2544.8	397	427	291	291	305	342.2
1509	103110	104271	99635	97485	107072	102315	730	765	690	690	732	721.4	0	0	0	0	0	0		1509	58514	60186	60124	60845	60845	60102.8	2598	2586	2416	2416	2773	2557.8	397	427	294	294	306	343.6
1510	103482	104654	100012	97861	107455	102693	727	767	695	694	738	724.2	0	0	0	0	0	0		1510	58714	60383	60330	61041	61041	60301.8	2612	2602	2449	2449	2777	2577.8	399	435	297	297	306	346.8
1511	103832	105011	100390	98241	107877	103070	737	773	694	708	744	731.2	0	0	0	0	0	0		1511	58920	60610	60527	61264	61264	60517	2619	2616	2457	2457	2815	2592.8	402	438	299	299	304	348.4
1512	104201	105408	100783	98628	108266	103457	731	777	700	720	736	732.8	0	0	0	0	0	0		1512	59105	60814	60739	61453	61453	60712.8	2619	2633	2476	2476	2819	2604.6	406	440	299	299	307	350.2
1513	104604	105790	101136	98979	108675	103837	745	773	704	729	728	735.8	0	0	0	0	0	0		1513	59270	61024	60942	61648	61648	60906.4	2629	2650	2479	2479	2813	2610	406	439	298	298	309	350
1514	104964	106186	101521	99357	109077	104221	742	776	703	739	733	738.6	0	0	0	0	0	0		1514	59456	61221	61120	61842	61842	61096.2	2634	2676	2483	2483	2809	2617	409	440	298	298	310	351
1515	105372	106585	101915	99720	109461	104611	732	770	704	739	731	735.2	0	0	0	0	0	0		1515	59625	61449	61324	62061	62061	61304	2628	2683	2489	2489	2823	2622.4	412	441	298	298	314	352.6
1516	105773	106980	102257	100069	109868	104989	737	772	704	746	724	736.6	0	0	0	0	0	0		1516	59827	61660	61575	62264	62264	61518	2628	2709	2514	2514	2831	2639.2	413	441	301	301	312	353.6
1517	106176	107382	102662	100466	110293	105396	743	786	716	757	719	744.2	0	0	0	0	0	0		1517	60026	61881	61790	62465	62465	61725.4	2635	2726	2516	2516	2839	2646.4	414	444	303	303	313	355.4
1518	106610	107816	103044	100865	110697	105806	755	775	716	763	721	746	0	0	0	0	0	0		1518	60225	62080	61972	62681	62681	61927.8	2648	2740	2542	2542	2824	2659.2	413	443	305	305	314	356
1519	106996	108206	103427	101221	111126	106195	761	773	714	760	737	749	0	0	0	0	0	0		1519	60435	62271	62169	62852	62852	62115.8	2660	2754	2542	2542	2828	2665.2	413	445	305	305	315	356.6
1520	107383	108566	103807	101598	111569	106585	773	764	711	761	729	747.6	0	0	0	0	0	0		1520	60652	62489	62356	63047	63047	62318.2	2678	2751	2534	2534	2836	2666.6	417	444	304	304	317	357.2
1521	107808	108951	104225	101966	111990	106988	777	761	722	759	731	750	0	0	0	0	0	0		1521	60850	62699	62521	63269	63269	62521.6	2685	2774	2528	2528	2831	2669.2	417	443	304	304	319	357.4
1522	108196	109361	104610	102330	112421	107384	772	772	732	758	725	751.8	0	0	0	0	0	0		1522	61060	62910	62721	63479	63479	62729.8	2709	2779	2531	2531	2827	2675.4	418	445	306	306	319	358.8
1523	108585	109759	104999	102709	112891	107789	779	767	730	754	728	751.6	0	0	0	0	0	0		1523	61277	63156	62921	63700	63700	62950.8	2703	2806	2540	2540	2826	2683	418	444	308	308	322	360
1524	109004	110166	105371	103098	113333	108194	782	764	731	753	726	751.2	0	0	0	0	0	0		1524	61471	63369	63131	63877	63877	63145	2718	2807	2561	2561	2820	2693.4	419	446	308	308	322	360.6
1525	109374	110519	105789	103489	113717	108578	778	777	733	750	735	754.6	0	0	0	0	0	0		1525	61696	63585	63326	64104	64104	63363	2731	2812	2568	2568	2825	2700.8	422	452	310	310	323	363.4
1526	109794	110913	106222	103885	114138	108990	776	782	741	742	746	757.4	0	0	0	0	0	0		1526	61890	63811	63559	64320	64320	63580	2738	2824	2585	2585	2842	2714.8	428	455	312	312	323	366
1527	110221	111304	106614	104251	114570	109392	777	793	755	738	751	762.8	0	0	0	0	0	0		1527	62111	64019	63783	64528	64528	63793.8	2745	2835	2605	2605	2853	2728.6	431	455	312	312	329	367.8
1528	110636	111695	106958	104638	114962	109778	786	789	760	758	746	767.8	0	0	0	0	0	0		1528	62309	64220	64012	64732	64732	64001	2749	2841	2620	2620	2865	2739	432	453	312	312	333	368.4
1529	111097	112099	107346	105028	115415	110197	789	798	765	759	745	771.2	0	0	0	0	0	0		1529	62490	64437	64212	64912	64912	64192.6	2760	2840	2621	2621	2877	2743.8	432	457	312	312	336	369.8
1530	111487	112505	107753	105413	115877	110607	784	792	772	753	760	772.2	0	0	0	0	0	0		1530	62681	64644	64423	65153	65153	64410.8	2767	2846	2634	2634	2884	2753	431	459	315	315	338	371.6
1531	111894	112935	108165	105802	116283	111016	784	788	764	752	776	772.8	0	0	0	0	0	0		1531	62894	64846	64658	65375	65375	64629.6	2762	2862	2638	2638	2901	2760.2	434	458	313	313	338	371.2
1532	112292	113347	108532	106206	116751	111426	781	795	766	744	783	773.8	0	0	0	0	0	0		1532	63103	65060	64880	65606	65606	64851	2774	2887	2645	2645	2915	2773.2	437	466	314	314	340	374.2
1533	112730	113766	108958	106619	117169	111848	794	809	781	747	794	785	0	0	0	0	0	0		1533	63349	65278	65088	65832	65832	65075.8	2799	2888	2646	2646	2920	2779.8	441	469	314	314	339	375.4
1534	113171	114219	109375	107004	117575	112269	798	812	785	767	794	791.2	0	0	0	0	0	0		1534	63566	65517	65330	66049	66049	65302.2	2813	2907	2662	2662	2927	2794.2	441	469	313	313	344	376
1535	113573	114641	109786	107388	117973	112672	796	811	791	771	794	792.6	0	0	0	0	0	0		1535	63769	65712	65567	66269	66269	65517.2	2827	2900	2672	2672	2932	2800.6	443	470	316	316	345	378
1536	114029	115036	110218	107745	118425	113091	801	803	788	768	798	791.6	0	0	0	0	0	0		1536	63988	65938	65791	66480	66480	65735.4	2846	2926	2674	2674	2943	2812.6	445	476	318	318	346	380.6
1537	114465	115474	110628	108162	118852	113516	798	810	792	770	801	794.2	0	0	0	0	0	0		1537	64208	66163	66024	66697	66697	65957.8	2852	2919	2685	2685	2954	2819	445	476	320	320	353	382.8
1538	114906	115876	111032	108552	119349	113943	815	813	787	776	818	801.8	0	0	0	0	0	0		1538	64414	66371	66234	66911	66911	66168.2	2857	2928	2694	2694	2948	2824.2	445	473	321	321	354	382.8
1539	115339	116277	111426	108957	119814	114363	824	810	784	793	810	804.2	0	0	0	0	0	0		1539	64616	66602	66421	67128	67128	66379	2871	2948	2697	2697	2970	2836.6	447	477	322	322	353	384.2
1540	115823	116679	111804	109350	120259	114783	835	809	790	790	818	808.4	0	0	0	0	0	0		1540	64822	66799	66635	67401	67401	66611.6	2892	2938	2704	2704	3011	2849.8	451	478	323	323	355	386
1541	116267	117107	112216	109771	120714	115215	843	820	789	802	819	814.6	0	0	0	0	0	0		1541	65040	66997	66862	67630	67630	66831.8	2899	2951	2706	2706	3012	2854.8	452	478	322	322	353	385.4
1542	116686	117536	112622	110193	121137	115635	837	826	786	797	816	812.4	0	0	0	0	0	0		1542	65240	67216	67097	67830	67830	67042.6	2905	2960	2721	2721	3007	2862.8	452	478	321	321	355	385.4
1543	117103	117956	113057	110653	121603	116074	825	832	791	795	825	813.6	0	0	0	0	0	0		1543	65439	67437	67302	68024	68024	67245.2	2890	2978	2726	2726	3016	2867.2	452	479	321	321	356	385.8
1544	117544	118410	113506	111109	122059	116526	842	849	795	808	839	826.6	0	0	0	0	0	0		1544	65621	67650	67527	68241	68241	67456	2879	2976	2740	2740	3018	2870.6	452	483	323	323	356	387.4
1545	117973	118850	113921	111535	122511	116958	846	858	803	815	837	831.8	0	0	0	0	0	0		1545	65865	67881	67763	68467	68467	67688.6	2886	2975	2736	2736	3028	2872.2	456	483	322	322	356	387.8
1546	118447	119336	114371	111925	122990	117414	853	852	809	815	831	832	0	0	0	0	0	0		1546	66090	68124	67993	68734	68734	67935	2898	2989	2753	2753	3039	2886.4	456	484	322	322	363	389.4
1547	118894	119779	114770	112317	123415	117835	854	869	818	820	824	837	0	0	0	0	0	0		1547	66273	68415	68235	68930	68930	68156.6	2909	3021	2776	2776	3029	2902.2	461	485	326	326	364	392.4
1548	119336	120197	115209	112729	123857	118266	856	865	813	819	830	836.6	0	0	0	0	0	0		1548	66507	68667	68477	69188	69188	68405.4	2915	3028	2781	2781	3051	2911.2	463	485	327	327	367	393.8
1549	119777	120658	115641	113150	124306	118706	853	865	816	829	836	839.8	0	0	0	0	0	0		1549	66729	68888	68709	69407	69407	68628	2925	3016	2794	2794	3070	2919.8	466	484	330	330	371	396.2
1550	120241	121074	116083	113557	124798	119151	845	862	817	826	826	835.2	0	0	0	0	0	0		1550	66933	69160	68926	69644	69644	68861.4	2928	3027	2803	2803	3081	2928.4	465	485	330	330	377	397.4
1551	120723	121519	116488	114020	125263	119603	852	857	821	840	821	838.2	0	0	0	0	0	0		1551	67200	69377	69158	69878	69878	69098.2	2947	3037	2811	2811	3088	2938.8	470	486	328	328	378	398
1552	121182	122000	116937	114462	125707	120058	859	865	827	845	822	843.6	0	0	0	0	0	0		1552	67465	69591	69403	70098	70098	69331	2951	3033	2832	2832	3084	2946.4	471	487	331	331	380	400
1553	121654	122409	117354	114901	126172	120498	852	861	836	851	820	844	0	0	0	0	0	0		1553	67688	69820	69607	70329	70329	69554.6	2973	3029	2850	2850	3072	2954.8	470	492	330	330	381	400.6
1554	122093	122863	117794	115323	126652	120945	852	854	837	856	824	844.6	0	0	0	0	0	0		1554	67909	70065	69853	70569	70569	69793	2980	3042	2865	2865	3098	2970	469	494	330	330	382	401
1555	122561	123308	118275	115743	127134	121404	867	855	844	852	834	850.4	0	0	0	0	0	0		1555	68103	70277	70066	70804	70804	70010.8	2968	3047	2875	2875	3115	2976	469	493	330	330	384	401.2
1556	123005	123778	118724	116209	127593	121862	868	858	844	850	839	851.8	0	0	0	0	0	0		1556	68323	70497	70295	71021	71021	70231.4	2979	3052	2909	2909	3123	2994.4	470	491	332	332	386	402.2
1557	123454	124216	119208	116656	128099	122327	895	860	857	850	845	861.4	0	0	0	0	0	0		1557	68548	70719	70544	71229	71229	70453.8	2973	3048	2917	2917	3122	2995.4	472	491	332	332	386	402.6
1558	123885	124690	119631	117070	128538	122763	889	851	861	847	846	858.8	0	0	0	0	0	0		1558	68765	70975	70782	71454	71454	70686	2970	3064	2939	2939	3126	3007.6	475	493	332	332	386	403.6
1559	124387	125096	120107	117503	129016	123222	905	845	869	854	840	862.6	0	0	0	0	0	0		1559	68987	71209	71008	71664	71664	70906.4	2983	3076	2943	2943	3136	3016.2	481	495	334	334	385	405.8
1560	124859	125559	120602	117923	129540	123697	910	861	868	843	847	865.8	0	0	0	0	0	0		1560	69228	71449	71243	71872	71872	71132.8	2993	3086	2944	2944	3147	3022.8	483	496	336	336	385	407.2
1561	125349	126034	121074	118359	130050	124173	902	876	869	846	853	869.2	0	0	0	0	0	0		1561	69487	71729	71508	72097	72097	71383.6	3009	3122	2962	2962	3148	3040.6	487	496	339	339	386	409.4
1562	125826	126496	121537	118792	130547	124640	918	881	863	839	865	873.2	0	0	0	0	0	0		1562	69702	71975	71721	72335	72335	71613.6	2999	3134	2960	2960	3162	3043	491	500	341	341	386	411.8
1563	126319	126950	122018	119263	131019	125114	924	889	875	856	865	881.8	0	0	0	0	0	0		1563	69948	72200	71976	72581	72581	71857.2	3015	3150	2979	2979	3172	3059	492	503	340	340	388	412.6
1564	126782	127454	122480	119695	131517	125586	924	896	876	860	867	884.6	0	0	0	0	0	0		1564	70179	72420	72211	72827	72827	72092.8	3022	3167	2983	2983	3201	3071.2	493	506	342	342	389	414.4
1565	127275	127960	122906	120122	132020	126057	935	910	886	854	872	891.4	0	0	0	0	0	0		1565	70401	72652	72446	73066	73066	72326.2	3026	3177	2998	2998	3211	3082	499	505	345	345	395	417.8
1566	127755	128453	123367	120566	132573	126543	938	915	880	856	867	891.2	0	0	0	0	0	0		1566	70620	72887	72674	73277	73277	72547	3024	3187	3003	3003	3215	3086.4	500	505	347	347	397	419.2
1567	128262	128939	123771	120999	133070	127008	947	948	876	854	877	900.4	0	0	0	0	0	0		1567	70868	73111	72915	73537	73537	72793.6	3038	3185	3013	3013	3225	3094.8	500	507	348	348	398	420.2
1568	128748	129410	124246	121438	133587	127486	951	959	889	851	887	907.4	0	0	0	0	0	0		1568	71119	73391	73156	73775	73775	73043.2	3060	3208	3016	3016	3232	3106.4	503	509	349	349	399	421.8
1569	129220	129873	124731	121909	134058	127958	949	957	890	853	878	905.4	0	0	0	0	0	0		1569	71368	73633	73408	74015	74015	73287.8	3082	3213	3030	3030	3238	3118.6	506	509	351	351	399	423.2
1570	129695	130351	125205	122368	134574	128439	960	956	893	852	882	908.6	0	0	0	0	0	0		1570	71602	73881	73671	74255	74255	73532.8	3092	3236	3038	3038	3251	3131	507	509	349	349	399	422.6
1571	130178	130844	125671	122840	135073	128921	949	965	898	853	895	912	0	0	0	0	0	0		1571	71837	74107	73884	74518	74518	73772.8	3101	3224	3038	3038	3278	3135.8	512	512	350	350	399	424.6
1572	130694	131348	126156	123333	135583	129423	963	956	894	852	911	915.2	0	0	0	0	0	0		1572	72069	74388	74104	74745	74745	74010.2	3125	3246	3046	3046	3297	3152	516	515	350	350	403	426.8
1573	131173	131841	126636	123799	136141	129918	954	960	908	851	923	919.2	0	0	0	0	0	0		1573	72326	74614	74349	74996	74996	74256.2	3133	3255	3064	3064	3311	3165.4	517	515	349	349	403	426.6
1574	131647	132328	127130	124251	136672	130406	957	956	914	857	930	922.8	0	0	0	0	0	0		1574	72569	74883	74593	75219	75219	74496.6	3135	3276	3065	3065	3313	3170.8	516	518	349	349	403	427
1575	132133	132810	127609	124749	137214	130903	952	953	916	873	941	927	0	0	0	0	0	0		1575	72827	75172	74845	75459	75459	74752.4	3139	3288	3089	3089	3328	3186.6	519	520	351	351	405	429.2
1576	132618	133274	128070	125223	137765	131390	952	950	922	888	955	933.4	0	0	0	0	0	0		1576	73096	75418	75103	75705	75705	75005.4	3168	3302	3098	3098	3344	3202	524	522	353	353	406	431.6
1577	133072	133751	128573	125717	138243	131871	956	950	906	886	973	934.2	0	0	0	0	0	0		1577	73336	75672	75344	75971	75971	75258.8	3202	3313	3098	3098	3373	3216.8	524	523	354	354	415	434
1578	133589	134220	129059	126238	138758	132373	947	955	913	900	981	939.2	0	0	0	0	0	0		1578	73612	75916	75588	76247	76247	75522	3233	3318	3112	3112	3406	3236.2	528	523	356	356	416	435.8
1579	134083	134721	129556	126669	139277	132861	935	945	920	900	987	937.4	0	0	0	0	0	0		1579	73864	76171	75870	76511	76511	75785.4	3241	3331	3116	3116	3407	3242.2	535	524	357	357	419	438.4
1580	134589	135191	130044	127178	139807	133362	937	945	926	912	983	940.6	0	0	0	0	0	0		1580	74133	76450	76122	76750	76750	76041	3258	3342	3139	3139	3415	3258.6	541	527	357	357	419	440.2
1581	135074	135645	130541	127657	140321	133848	936	948	923	907	984	939.6	0	0	0	0	0	0		1581	74392	76691	76402	76995	76995	76295	3283	3337	3155	3155	3424	3270.8	542	528	357	357	420	440.8
1582	135577	136134	131006	128151	140858	134345	938	944	916	925	997	944	0	0	0	0	0	0		1582	74628	76919	76630	77275	77275	76545.4	3297	3336	3157	3157	3448	3279	546	528	357	357	422	442
1583	136073	136637	131542	128640	141374	134853	938	949	942	937	1001	953.4	0	0	0	0	0	0		1583	74892	77169	76864	77538	77538	76800.2	3302	3344	3162	3162	3475	3289	547	529	361	361	423	444.2
1584	136567	137152	132052	129118	141875	135353	953	941	944	944	1003	957	0	0	0	0	0	0		1584	75170	77404	77107	77767	77767	77043	3307	3352	3169	3169	3478	3295	549	528	361	361	426	445
1585	137078	137688	132595	129622	142404	135877	956	944	940	948	1009	959.4	0	0	0	0	0	0		1585	75449	77636	77392	78031	78031	77307.8	3332	3366	3196	3196	3488	3315.6	553	532	363	363	429	448
1586	137563	138194	133147	130098	142918	136384	963	948	959	937	999	961.2	0	0	0	0	0	0		1586	75704	77902	77658	78301	78301	77573.2	3332	3381	3200	3200	3504	3323.4	553	536	364	364	430	449.4
1587	138108	138728	133598	130581	143436	136890	979	960	951	933	1009	966.4	0	0	0	0	0	0		1587	75986	78172	77924	78532	78532	77829.2	3354	3393	3214	3214	3508	3336.6	556	538	364	364	432	450.8
1588	138656	139283	134081	131043	143984	137409	994	960	947	933	1012	969.2	0	0	0	0	0	0		1588	76241	78427	78178	78809	78809	78092.8	3364	3405	3237	3237	3527	3354	558	540	367	367	433	453
1589	139211	139764	134603	131520	144509	137921	1001	954	955	922	1018	970	0	0	0	0	0	0		1589	76514	78657	78429	79063	79063	78345.2	3364	3417	3252	3252	3554	3367.8	566	541	366	366	437	455.2
1590	139757	140281	135153	132025	145038	138451	1005	956	956	929	1007	970.6	0	0	0	0	0	0		1590	76753	78905	78697	79299	79299	78590.6	3373	3423	3251	3251	3559	3371.4	571	545	368	368	437	457.8
1591	140325	140850	135664	132540	145585	138993	1019	956	963	935	1005	975.6	0	0	0	0	0	0		1591	77006	79168	78938	79529	79529	78834	3383	3440	3255	3255	3562	3379	568	546	371	371	437	458.6
1592	140834	141354	136176	133042	146090	139499	1030	955	965	926	1014	978	0	0	0	0	0	0		1592	77249	79452	79179	79784	79784	79089.6	3386	3461	3259	3259	3568	3386.6	573	548	373	373	439	461.2
1593	141359	141874	136688	133533	146633	140017	1038	963	966	933	1019	983.8	0	0	0	0	0	0		1593	77488	79724	79467	80057	80057	79358.6	3401	3481	3279	3279	3591	3406.2	572	550	379	379	444	464.8
1594	141889	142403	137178	134057	147192	140544	1053	959	973	939	1022	989.2	0	0	0	0	0	0		1594	77768	80004	79777	80319	80319	79637.4	3413	3515	3310	3310	3609	3431.4	573	554	385	385	448	469
1595	142386	142931	137667	134569	147742	141059	1056	960	968	958	1041	996.6	0	0	0	0	0	0		1595	78063	80290	80068	80557	80557	79907	3411	3520	3332	3332	3613	3441.6	576	556	385	385	448	470
1596	142916	143431	138213	135060	148333	141591	1057	959	984	950	1042	998.4	0	0	0	0	0	0		1596	78330	80542	80340	80808	80808	80165.6	3431	3538	3341	3341	3616	3453.4	577	558	388	388	452	472.6
1597	143421	143974	138755	135582	148921	142131	1060	969	979	951	1046	1001	0	0	0	0	0	0		1597	78586	80779	80621	81040	81040	80413.2	3426	3545	3358	3358	3624	3462.2	578	560	392	392	453	475
1598	143931	144516	139260	136100	149508	142663	1061	982	981	960	1037	1004.2	0	0	0	0	0	0		1598	78836	81057	80889	81284	81284	80670	3439	3554	3381	3381	3630	3477	581	562	394	394	459	478
1599	144475	145053	139782	136597	150065	143194	1066	986	983	979	1039	1010.6	0	0	0	0	0	0		1599	79099	81301	81153	81568	81568	80937.8	3444	3571	3398	3398	3656	3493.4	583	568	399	399	462	482.2
1600	145006	145619	140273	137120	150641	143732	1066	998	982	995	1052	1018.6	0	0	0	0	0	0		1600	79350	81552	81404	81812	81812	81186	3446	3577	3404	3404	3650	3496.2	587	573	400	400	458	483.6
1601	145557	146161	140762	137622	151161	144253	1072	1001	976	1005	1061	1023	0	0	0	0	0	0		1601	79625	81849	81696	82077	82077	81464.8	3440	3618	3420	3420	3652	3510	585	573	401	401	462	484.4
1602	146104	146687	141299	138150	151750	144798	1065	1020	994	994	1054	1025.4	0	0	0	0	0	0		1602	79861	82127	81949	82320	82320	81715.4	3455	3628	3420	3420	3677	3520	590	574	399	399	462	484.8
1603	146635	147238	141844	138651	152320	145338	1068	1037	995	995	1050	1029	0	0	0	0	0	0		1603	80133	82415	82232	82559	82559	81979.6	3466	3638	3436	3436	3672	3529.6	594	576	401	401	467	487.8
1604	147171	147848	142377	139162	152929	145897	1071	1048	998	991	1055	1032.6	0	0	0	0	0	0		1604	80406	82714	82481	82815	82815	82246.2	3472	3646	3440	3440	3680	3535.6	593	578	402	402	469	488.8
1605	147707	148400	142901	139704	153461	146435	1086	1055	1016	993	1065	1043	0	0	0	0	0	0		1605	80701	82999	82739	83099	83099	82527.4	3509	3656	3448	3448	3681	3548.4	597	580	401	401	469	489.6
1606	148227	148966	143423	140208	154033	146971	1086	1063	1021	997	1077	1048.8	0	0	0	0	0	0		1606	80985	83264	83012	83369	83369	82799.8	3538	3686	3476	3476	3682	3571.6	600	582	403	403	470	491.6
1607	148737	149524	143953	140769	154616	147520	1086	1074	1019	1003	1078	1052	0	0	0	0	0	0		1607	81260	83530	83299	83640	83640	83073.8	3559	3694	3501	3501	3684	3587.8	600	582	403	403	472	492
1608	149283	150079	144475	141301	155178	148063	1085	1086	1012	1005	1091	1055.8	0	0	0	0	0	0		1608	81495	83809	83570	83913	83913	83340	3553	3717	3517	3517	3694	3599.6	601	582	403	403	471	492
1609	149856	150684	145034	141801	155736	148622	1086	1090	1012	994	1095	1055.4	0	0	0	0	0	0		1609	81774	84059	83863	84227	84227	83630	3597	3716	3508	3508	3719	3609.6	607	582	401	401	473	492.8
1610	150441	151238	145568	142347	156338	149186	1077	1091	1004	1007	1101	1056	0	0	0	0	0	0		1610	82040	84316	84150	84516	84516	83907.6	3620	3728	3513	3513	3724	3619.6	613	590	403	403	473	496.4
1611	150993	151779	146090	142808	156924	149719	1079	1090	1000	1011	1106	1057.2	0	0	0	0	0	0		1611	82302	84576	84445	84787	84787	84179.4	3647	3728	3534	3534	3729	3634.4	614	591	404	404	473	497.2
1612	151566	152363	146618	143365	157536	150290	1089	1086	1012	1016	1113	1063.2	0	0	0	0	0	0		1612	82587	84837	84757	85074	85074	84465.8	3662	3737	3550	3550	3730	3645.8	615	593	404	404	473	497.8
1613	152126	152951	147145	143885	158135	150848	1099	1089	1008	1025	1126	1069.4	0	0	0	0	0	0		1613	82859	85118	85052	85372	85372	84754.6	3694	3737	3567	3567	3741	3661.2	622	594	407	407	476	501.2
1614	152704	153564	147713	144412	158689	151416	1099	1086	1006	1029	1130	1070	0	0	0	0	0	0		1614	83159	85373	85357	85661	85661	85042.2	3705	3763	3582	3582	3754	3677.2	625	596	410	410	481	504.4
1615	153273	154113	148254	144984	159254	151976	1103	1096	1007	1038	1143	1077.4	0	0	0	0	0	0		1615	83434	85647	85592	85941	85941	85311	3710	3768	3582	3582	3742	3676.8	625	599	413	413	481	506.2
1616	153891	154661	148809	145531	159870	152552	1118	1086	1004	1051	1165	1084.8	0	0	0	0	0	0		1616	83675	85930	85846	86235	86235	85584.2	3709	3777	3574	3574	3740	3674.8	627	604	413	413	484	508.2
1617	154465	155304	149393	146063	160477	153140	1117	1096	1019	1063	1163	1091.6	0	0	0	0	0	0		1617	83950	86218	86147	86535	86535	85877	3735	3793	3595	3595	3762	3696	631	607	416	416	485	511
1618	155023	155869	149890	146640	161051	153695	1121	1089	1019	1076	1162	1093.4	0	0	0	0	0	0		1618	84225	86485	86423	86798	86798	86145.8	3751	3821	3596	3596	3762	3705.2	631	611	419	419	484	512.8
1619	155655	156471	150448	147204	161611	154278	1121	1084	1028	1082	1161	1095.2	0	0	0	0	0	0		1619	84493	86748	86706	87066	87066	86415.8	3755	3839	3608	3608	3763	3714.6	632	610	423	423	483	514.2
1620	156237	157094	150972	147774	162220	154859	1128	1087	1033	1084	1178	1102	0	0	0	0	0	0		1620	84771	87029	87002	87341	87341	86696.8	3759	3835	3625	3625	3762	3721.2	629	611	422	422	489	514.6
1621	156818	157723	151558	148312	162817	155446	1126	1106	1047	1090	1186	1111	0	0	0	0	0	0		1621	85069	87310	87316	87590	87590	86975	3761	3852	3634	3634	3774	3731	633	613	423	423	491	516.6
1622	157413	158307	152114	148907	163413	156031	1127	1105	1052	1097	1176	1111.4	0	0	0	0	0	0		1622	85385	87596	87570	87886	87886	87264.6	3796	3864	3631	3631	3791	3742.6	634	619	426	426	496	520.2
1623	157994	158938	152684	149458	163976	156610	1123	1119	1050	1116	1175	1116.6	0	0	0	0	0	0		1623	85683	87857	87858	88194	88194	87557.2	3824	3893	3640	3640	3809	3761.2	638	621	426	426	497	521.6
1624	158548	159534	153251	150027	164540	157180	1121	1131	1070	1120	1168	1122	0	0	0	0	0	0		1624	85980	88148	88147	88467	88467	87841.8	3823	3913	3646	3646	3806	3766.8	643	625	425	425	501	523.8
1625	159135	160154	153847	150557	165152	157769	1127	1138	1072	1109	1170	1123.2	0	0	0	0	0	0		1625	86296	88440	88402	88765	88765	88133.6	3868	3946	3656	3656	3824	3790	652	631	427	427	505	528.4
1626	159723	160761	154451	151091	165745	158354	1124	1129	1072	1112	1173	1122	0	0	0	0	0	0		1626	86583	88723	88687	89057	89057	88421.4	3887	3955	3666	3666	3828	3800.4	652	636	427	427	508	530
1627	160287	161344	155022	151625	166379	158931	1130	1129	1069	1104	1193	1125	0	0	0	0	0	0		1627	86865	89002	88983	89345	89345	88708	3891	3958	3672	3672	3841	3806.8	652	637	432	432	513	533.2
1628	160863	161910	155588	152176	167023	159512	1143	1137	1084	1113	1205	1136.4	0	0	0	0	0	0		1628	87174	89277	89311	89666	89666	89018.8	3913	3970	3673	3673	3852	3816.2	653	638	431	431	512	533
1629	161470	162507	156191	152721	167652	160108	1153	1140	1084	1117	1201	1139	0	0	0	0	0	0		1629	87454	89601	89619	89952	89952	89315.6	3920	3994	3705	3705	3859	3836.6	653	645	434	434	514	536
1630	162016	163109	156774	153306	168313	160704	1144	1144	1091	1118	1198	1139	0	0	0	0	0	0		1630	87734	89899	89927	90265	90265	89618	3929	4018	3714	3714	3880	3851	656	646	435	435	516	537.6
1631	162591	163751	157409	153910	168981	161328	1147	1153	1103	1122	1214	1147.8	0	0	0	0	0	0		1631	88042	90209	90228	90602	90602	89936.6	3955	4044	3725	3725	3898	3869.4	657	646	436	436	519	538.8
1632	163183	164338	158018	154498	169632	161934	1146	1150	1113	1116	1230	1151	0	0	0	0	0	0		1632	88325	90510	90512	90873	90873	90218.6	3949	4046	3737	3737	3915	3876.8	657	644	435	435	523	538.8
1633	163820	164922	158611	155047	170300	162540	1144	1160	1107	1121	1241	1154.6	0	0	0	0	0	0		1633	88588	90787	90826	91178	91178	90511.4	3950	4045	3750	3750	3922	3883.4	659	644	434	434	523	538.8
1634	164380	165545	159220	155606	170921	163134	1142	1169	1114	1128	1240	1158.6	0	0	0	0	0	0		1634	88889	91120	91132	91490	91490	90824.2	3973	4056	3774	3774	3956	3906.6	660	648	438	438	530	542.8
1635	165040	166157	159792	156122	171549	163732	1148	1178	1123	1114	1242	1161	0	0	0	0	0	0		1635	89199	91390	91419	91799	91799	91121.2	4004	4072	3766	3766	3967	3915	663	650	442	442	531	545.6
1636	165697	166836	160382	156706	172183	164361	1154	1184	1134	1113	1249	1166.8	0	0	0	0	0	0		1636	89495	91673	91769	92116	92116	91433.8	4021	4088	3801	3801	3987	3939.6	666	654	444	444	534	548.4
1637	166297	167441	160998	157273	172803	164962	1165	1178	1143	1102	1258	1169.2	0	0	0	0	0	0		1637	89775	91981	92052	92388	92388	91716.8	4027	4116	3808	3808	4001	3952	670	658	444	444	535	550.2
1638	166952	168058	161617	157877	173412	165583	1164	1177	1147	1099	1279	1173.2	0	0	0	0	0	0		1638	90051	92284	92353	92704	92704	92019.2	4029	4148	3834	3834	4014	3971.8	670	658	447	447	534	551.2
1639	167552	168752	162244	158475	174069	166218	1176	1191	1152	1114	1296	1185.8	0	0	0	0	0	0		1639	90351	92578	92642	93020	93020	92322.2	4046	4144	3845	3845	4016	3979.2	670	663	450	450	535	553.6
1640	168192	169421	162834	159027	174650	166825	1187	1199	1150	1106	1287	1185.8	0	0	0	0	0	0		1640	90619	92858	92950	93285	93285	92599.4	4063	4143	3848	3848	4019	3984.2	677	669	448	448	537	555.8
1641	168849	170099	163437	159639	175299	167465	1183	1209	1158	1112	1293	1191	0	0	0	0	0	0		1641	90927	93153	93253	93592	93592	92903.4	4079	4150	3857	3857	4031	3994.8	681	670	453	453	541	559.6
1642	169472	170746	164026	160288	175994	168105	1184	1227	1155	1129	1289	1196.8	0	0	0	0	0	0		1642	91212	93475	93525	93859	93859	93186	4083	4175	3860	3860	4034	4002.4	679	674	456	456	546	562.2
1643	170095	171404	164668	160872	176680	168744	1214	1243	1166	1134	1299	1211.2	0	0	0	0	0	0		1643	91524	93761	93816	94184	94184	93493.8	4108	4179	3877	3877	4061	4020.4	682	677	456	456	547	563.6
1644	170752	172055	165293	161463	177345	169382	1212	1244	1169	1135	1291	1210.2	0	0	0	0	0	0		1644	91835	94082	94128	94509	94509	93812.6	4121	4208	3879	3879	4082	4033.8	683	676	457	457	547	564
1645	171353	172715	165902	162093	177996	170012	1219	1256	1164	1130	1288	1211.4	0	0	0	0	0	0		1645	92133	94366	94463	94842	94842	94129.2	4142	4206	3882	3882	4099	4042.2	687	677	456	456	551	565.4
1646	171995	173360	166525	162693	178625	170640	1224	1258	1169	1144	1283	1215.6	0	0	0	0	0	0		1646	92414	94663	94808	95170	95170	94445	4152	4214	3919	3919	4113	4063.4	691	681	458	458	549	567.4
1647	172622	174025	167181	163269	179313	171282	1223	1259	1186	1144	1273	1217	0	0	0	0	0	0		1647	92717	94955	95102	95503	95503	94756	4172	4231	3945	3945	4132	4085	692	683	462	462	555	570.8
1648	173281	174652	167814	163840	179953	171908	1217	1256	1182	1169	1282	1221.2	0	0	0	0	0	0		1648	92984	95279	95441	95833	95833	95074	4170	4239	3955	3955	4139	4091.6	691	687	463	463	560	572.8
1649	173939	175274	168433	164466	180593	172541	1224	1253	1177	1180	1290	1224.8	0	0	0	0	0	0		1649	93263	95570	95738	96171	96171	95382.6	4177	4252	3967	3967	4154	4103.4	695	691	466	466	561	575.8
1650	174596	175930	169038	165066	181206	173167	1225	1264	1186	1174	1291	1228	0	0	0	0	0	0		1650	93544	95892	96048	96482	96482	95689.6	4190	4261	3981	3981	4165	4115.6	698	696	466	466	563	577.8
1651	175238	176603	169693	165655	181889	173816	1222	1259	1195	1178	1291	1229	0	0	0	0	0	0		1651	93835	96184	96358	96817	96817	96002.2	4218	4276	3997	3997	4180	4133.6	707	698	467	467	570	581.8
1652	175860	177261	170338	166277	182594	174466	1204	1250	1206	1184	1284	1225.6	0	0	0	0	0	0		1652	94137	96471	96693	97150	97150	96320.2	4228	4286	4012	4012	4189	4145.4	707	702	472	472	573	585.2
1653	176546	177907	170985	166898	183292	175126	1215	1251	1212	1195	1298	1234.2	0	0	0	0	0	0		1653	94475	96787	97021	97446	97446	96635	4261	4287	4016	4016	4204	4156.8	713	709	475	475	573	589
1654	177165	178557	171605	167505	183991	175765	1228	1250	1227	1203	1297	1241	0	0	0	0	0	0		1654	94772	97122	97312	97793	97793	96958.4	4278	4304	4029	4029	4247	4177.4	717	708	477	477	573	590.4
1655	177806	179262	172191	168143	184674	176415	1239	1264	1225	1206	1309	1248.6	0	0	0	0	0	0		1655	95108	97481	97610	98126	98126	97290.2	4310	4332	4030	4030	4266	4193.6	721	711	483	483	573	594.2
1656	178462	179918	172821	168781	185336	177064	1239	1265	1219	1210	1307	1248	0	0	0	0	0	0		1656	95407	97803	97895	98481	98481	97613.4	4319	4332	4041	4041	4278	4202.2	725	715	485	485	573	596.6
1657	179134	180598	173448	169440	186022	177728	1231	1266	1219	1217	1302	1247	0	0	0	0	0	0		1657	95716	98112	98223	98796	98796	97928.6	4324	4350	4052	4052	4307	4217	730	719	488	488	572	599.4
1658	179812	181303	174088	170067	186697	178393	1238	1263	1222	1231	1321	1255	0	0	0	0	0	0		1658	96073	98403	98553	99140	99140	98261.8	4339	4341	4076	4076	4328	4232	730	722	490	490	572	600.8
1659	180465	181985	174730	170685	187396	179052	1257	1257	1227	1233	1320	1258.8	0	0	0	0	0	0		1659	96394	98744	98910	99511	99511	98614	4345	4350	4101	4101	4358	4251	732	728	495	495	576	605.2
1660	181123	182701	175407	171310	188108	179730	1272	1258	1235	1254	1337	1271.2	0	0	0	0	0	0		1660	96674	99074	99225	99820	99820	98922.6	4340	4365	4133	4133	4366	4267.4	734	732	498	498	578	608
1661	181817	183400	175987	171983	188790	180395	1283	1271	1221	1271	1338	1276.8	0	0	0	0	0	0		1661	96990	99404	99553	100162	100162	99254.2	4354	4372	4171	4171	4393	4292.2	732	731	499	499	581	608.4
1662	182530	184059	176660	172653	189440	181068	1293	1280	1228	1264	1325	1278	0	0	0	0	0	0		1662	97299	99709	99904	100479	100479	99574	4359	4381	4195	4195	4419	4309.8	734	731	502	502	589	611.6
1663	183263	184784	177291	173289	190168	181759	1297	1277	1232	1256	1331	1278.6	0	0	0	0	0	0		1663	97612	100049	100236	100823	100823	99908.6	4372	4389	4198	4198	4440	4319.4	735	735	502	502	591	613
1664	183946	185467	177908	173966	190895	182436	1308	1283	1228	1271	1328	1283.6	0	0	0	0	0	0		1664	97915	100384	100545	101142	101142	100226	4366	4399	4211	4211	4441	4325.6	743	736	503	503	592	615.4
1665	184648	186202	178574	174648	191654	183145	1333	1294	1222	1268	1334	1290.2	0	0	0	0	0	0		1665	98222	100714	100899	101453	101453	100548	4367	4438	4223	4223	4463	4342.8	749	736	505	505	592	617.4
1666	185322	186877	179186	175292	192331	183802	1347	1309	1228	1273	1352	1301.8	0	0	0	0	0	0		1666	98515	101016	101242	101792	101792	100871	4369	4437	4265	4265	4485	4364.2	752	740	512	512	596	622.4
1667	186038	187564	179822	175926	193011	184472	1360	1313	1239	1264	1341	1303.4	0	0	0	0	0	0		1667	98805	101386	101608	102091	102091	101196	4375	4467	4295	4295	4493	4385	756	745	514	514	601	626
1668	186740	188266	180468	176559	193723	185151	1363	1330	1234	1262	1358	1309.4	0	0	0	0	0	0		1668	99142	101724	101972	102420	102420	101536	4396	4482	4334	4334	4516	4412.4	759	747	520	520	606	630.4
1669	187457	189031	181151	177222	194408	185854	1363	1333	1237	1266	1360	1311.8	0	0	0	0	0	0		1669	99464	102052	102318	102717	102717	101854	4390	4487	4355	4355	4501	4417.6	762	748	522	522	608	632.4
1670	188183	189716	181869	177880	195132	186556	1380	1340	1250	1264	1377	1322.2	0	0	0	0	0	0		1670	99790	102397	102650	103020	103020	102175	4427	4522	4377	4377	4500	4440.6	765	749	526	526	612	635.6
1671	188863	190414	182539	178523	195906	187249	1387	1344	1258	1263	1394	1329.2	0	0	0	0	0	0		1671	100067	102710	102995	103371	103371	102503	4439	4526	4396	4396	4506	4452.6	765	748	530	530	617	638
1672	189594	191162	183227	179143	196644	187954	1388	1359	1249	1281	1399	1335.2	0	0	0	0	0	0		1672	100387	103123	103329	103725	103725	102858	4445	4570	4415	4415	4516	4472.2	773	746	537	537	622	643
1673	190296	191883	183895	179822	197438	188667	1381	1373	1253	1300	1406	1342.6	0	0	0	0	0	0		1673	100732	103442	103637	104073	104073	103191	4476	4589	4419	4419	4534	4487.4	780	752	539	539	627	647.4
1674	190953	192593	184570	180485	198188	189358	1378	1378	1259	1288	1404	1341.4	0	0	0	0	0	0		1674	101113	103792	103951	104400	104400	103531	4501	4609	4433	4433	4545	4504.2	782	756	544	544	624	650
1675	191650	193347	185221	181130	198854	190040	1371	1381	1264	1294	1409	1343.8	0	0	0	0	0	0		1675	101435	104158	104264	104769	104769	103879	4520	4619	4450	4450	4550	4517.8	784	754	548	548	624	651.6
1676	192360	194057	185957	181808	199592	190755	1368	1376	1279	1316	1424	1352.6	0	0	0	0	0	0		1676	101773	104493	104580	105099	105099	104209	4531	4637	4456	4456	4563	4528.6	790	756	551	551	628	655.2
1677	193050	194801	186649	182495	200273	191454	1362	1393	1288	1311	1418	1354.4	0	0	0	0	0	0		1677	102084	104836	104915	105467	105467	104554	4555	4663	4460	4460	4594	4546.4	792	757	553	553	630	657
1678	193769	195524	187380	183188	200997	192172	1374	1390	1289	1315	1424	1358.4	0	0	0	0	0	0		1678	102440	105177	105274	105800	105800	104898	4572	4656	4480	4480	4606	4558.8	793	758	557	557	630	659
1679	194462	196247	188062	183892	201740	192881	1353	1386	1291	1333	1426	1357.8	0	0	0	0	0	0		1679	102787	105555	105607	106168	106168	105257	4572	4683	4496	4496	4614	4572.2	794	765	563	563	634	663.8
1680	195190	197004	188772	184583	202451	193600	1353	1402	1297	1341	1431	1364.8	0	0	0	0	0	0		1680	103111	105906	105982	106531	106531	105612	4581	4711	4507	4507	4630	4587.2	798	769	564	564	635	666
1681	195918	197730	189445	185262	203188	194309	1366	1406	1295	1346	1438	1370.2	0	0	0	0	0	0		1681	103446	106230	106322	106868	106868	105947	4598	4708	4520	4520	4638	4596.8	803	773	565	565	633	667.8
1682	196619	198391	190200	185977	203895	195016	1383	1395	1320	1349	1435	1376.4	0	0	0	0	0	0		1682	103809	106574	106680	107223	107223	106302	4631	4739	4517	4517	4646	4610	805	776	572	572	639	672.8
1683	197400	199113	190922	186687	204617	195748	1389	1402	1337	1368	1438	1386.8	0	0	0	0	0	0		1683	104191	106948	107011	107570	107570	106658	4652	4765	4523	4523	4660	4624.6	810	780	577	577	643	677.4
1684	198101	199897	191613	187430	205411	196490	1385	1418	1330	1367	1442	1388.4	0	0	0	0	0	0		1684	104571	107338	107313	107919	107919	107012	4700	4791	4539	4539	4662	4646.2	814	780	584	584	645	681.4
1685	198856	200667	192323	188081	206200	197225	1384	1419	1324	1367	1439	1386.6	0	0	0	0	0	0		1685	104917	107679	107649	108263	108263	107354	4715	4816	4539	4539	4695	4660.8	820	784	585	585	649	684.6
1686	199648	201367	193027	188744	206957	197949	1393	1412	1333	1367	1446	1390.2	0	0	0	0	0	0		1686	105234	108014	107984	108669	108669	107714	4754	4821	4558	4558	4697	4677.6	820	788	589	589	650	687.2
1687	200401	202085	193697	189426	207730	198668	1400	1401	1356	1367	1452	1395.2	0	0	0	0	0	0		1687	105590	108361	108339	109051	109051	108078	4781	4832	4560	4560	4740	4694.6	824	790	589	589	651	688.6
1688	201137	202856	194438	190106	208515	199410	1415	1399	1353	1370	1449	1397.2	0	0	0	0	0	0		1688	105917	108747	108684	109433	109433	108443	4791	4860	4591	4591	4756	4717.8	831	795	592	592	656	693.2
1689	201932	203636	195151	190812	209297	200166	1437	1399	1354	1384	1467	1408.2	0	0	0	0	0	0		1689	106246	109114	109059	109832	109832	108817	4807	4893	4607	4607	4772	4737.2	834	799	593	593	656	695
1690	202683	204397	195873	191521	210082	200911	1434	1395	1350	1376	1470	1405	0	0	0	0	0	0		1690	106621	109516	109420	110204	110204	109193	4801	4946	4625	4625	4779	4755.2	839	800	595	595	654	696.6
1691	203429	205163	196573	192239	210844	201650	1433	1413	1347	1380	1472	1409	0	0	0	0	0	0		1691	106960	109880	109769	110566	110566	109548	4835	4952	4628	4628	4809	4770.4	846	800	598	598	659	700.2
1692	204191	205963	197273	192910	211683	202404	1441	1433	1344	1373	1479	1414	0	0	0	0	0	0		1692	107302	110259	110134	110997	110997	109938	4840	4988	4643	4643	4859	4794.6	848	800	600	600	665	702.6
1693	204984	206710	197986	193651	212468	203160	1451	1433	1352	1384	1492	1422.4	0	0	0	0	0	0		1693	107659	110632	110490	111362	111362	110301	4867	5013	4678	4678	4879	4823	850	806	605	605	668	706.8
1694	205736	207479	198677	194349	213247	203898	1454	1439	1350	1372	1509	1424.8	0	0	0	0	0	0		1694	107995	111046	110868	111706	111706	110664	4868	5049	4694	4694	4896	4840.2	849	813	608	608	669	709.4
1695	206447	208182	199350	195068	214038	204617	1443	1442	1355	1396	1536	1434.4	0	0	0	0	0	0		1695	108358	111381	111229	112114	112114	111039	4895	5054	4699	4699	4908	4851	854	815	609	609	668	711
1696	207236	208951	200103	195764	214843	205379	1467	1450	1344	1395	1543	1439.8	0	0	0	0	0	0		1696	108749	111722	111570	112510	112510	111412	4927	5080	4697	4697	4923	4864.8	858	817	609	609	666	711.8
1697	207998	209789	200863	196492	215630	206154	1462	1467	1351	1407	1564	1450.2	0	0	0	0	0	0		1697	109056	112126	111965	112891	112891	111786	4925	5119	4703	4703	4924	4874.8	861	818	614	614	668	715
1698	208728	210636	201628	197200	216458	206930	1475	1462	1373	1414	1554	1455.6	0	0	0	0	0	0		1698	109436	112555	112372	113259	113259	112176	4950	5173	4727	4727	4949	4905.2	863	822	616	616	673	718
1699	209522	211445	202383	197937	217287	207715	1493	1475	1402	1419	1551	1468	0	0	0	0	0	0		1699	109768	112913	112770	113643	113643	112547	4961	5190	4761	4761	4978	4930.2	865	824	620	620	674	720.6
1700	210317	212245	203188	198697	218141	208518	1501	1482	1420	1420	1565	1477.6	0	0	0	0	0	0		1700	110143	113270	113152	114028	114028	112924	4972	5183	4784	4784	4984	4941.4	865	821	620	620	670	719.2
1701	211114	213000	203950	199451	218970	209297	1524	1483	1420	1435	1571	1486.6	0	0	0	0	0	0		1701	110502	113644	113553	114407	114407	113303	4994	5196	4813	4813	4989	4961	871	826	623	623	669	722.4
1702	211903	213802	204664	200215	219816	210080	1521	1496	1420	1447	1584	1493.6	0	0	0	0	0	0		1702	110862	114035	113936	114767	114767	113673	5013	5235	4848	4848	5005	4989.8	874	828	623	623	672	724
1703	212746	214567	205401	201028	220648	210878	1529	1493	1441	1465	1588	1503.2	0	0	0	0	0	0		1703	111183	114411	114307	115146	115146	114039	4992	5242	4857	4857	5009	4991.4	871	829	625	625	674	724.8
1704	213577	215325	206123	201764	221413	211640	1534	1500	1429	1466	1580	1501.8	0	0	0	0	0	0		1704	111564	114803	114659	115507	115507	114408	5023	5242	4868	4868	5008	5001.8	875	831	626	626	672	726
1705	214384	216103	206827	202543	222235	212418	1529	1511	1417	1477	1590	1504.8	0	0	0	0	0	0		1705	111945	115184	115057	115909	115909	114801	5049	5269	4892	4892	5042	5028.8	879	838	628	628	672	729
1706	215171	216882	207588	203280	223084	213201	1529	1517	1431	1482	1584	1508.6	0	0	0	0	0	0		1706	112296	115545	115418	116313	116313	115177	5081	5280	4911	4911	5047	5046	880	835	629	629	678	730.2
1707	215946	217675	208376	203991	223930	213984	1543	1524	1455	1474	1600	1519.2	0	0	0	0	0	0		1707	112648	115892	115764	116684	116684	115534	5087	5267	4920	4920	5059	5050.6	880	835	628	628	684	731
1708	216716	218453	209145	204802	224841	214791	1554	1539	1446	1498	1611	1529.6	0	0	0	0	0	0		1708	113010	116285	116133	117042	117042	115902	5087	5277	4952	4952	5062	5066	880	839	631	631	687	733.6
1709	217529	219280	209912	205491	225656	215574	1549	1541	1460	1496	1616	1532.4	0	0	0	0	0	0		1709	113380	116684	116544	117426	117426	116292	5109	5283	4973	4973	5078	5083.2	885	841	636	636	686	736.8
1710	218308	220101	210689	206272	226489	216372	1539	1539	1472	1505	1620	1535	0	0	0	0	0	0		1710	113762	117053	116944	117823	117823	116681	5120	5282	5016	5016	5108	5108.4	890	842	640	640	692	740.8
1711	219118	220920	211457	207050	227381	217185	1553	1537	1484	1515	1617	1541.2	0	0	0	0	0	0		1711	114115	117446	117304	118176	118176	117043	5118	5299	5035	5035	5109	5119.2	890	843	640	640	692	741
1712	219966	221771	212300	207768	228248	218011	1555	1557	1473	1504	1619	1541.6	0	0	0	0	0	0		1712	114524	117786	117704	118567	118567	117430	5163	5316	5065	5065	5124	5146.6	891	847	645	645	693	744.2
1713	220803	222574	213057	208558	229121	218823	1556	1571	1494	1519	1625	1553	0	0	0	0	0	0		1713	114919	118165	118084	118920	118920	117802	5171	5330	5085	5085	5134	5161	889	846	650	650	698	746.6
1714	221637	223359	213851	209373	230026	219649	1553	1564	1494	1536	1639	1557.2	0	0	0	0	0	0		1714	115318	118560	118509	119278	119278	118189	5183	5341	5105	5105	5131	5173	889	848	656	656	699	749.6
1715	222437	224218	214612	210144	230899	220462	1558	1570	1507	1538	1641	1562.8	0	0	0	0	0	0		1715	115738	118985	118874	119701	119701	118600	5226	5373	5110	5110	5166	5197	892	847	659	659	704	752.2
1716	223249	225040	215449	210970	231768	221295	1562	1587	1506	1542	1657	1570.8	0	0	0	0	0	0		1716	116094	119418	119290	120065	120065	118986	5224	5402	5135	5135	5173	5213.8	892	849	661	661	707	754
1717	224060	225842	216268	211762	232654	222117	1559	1607	1500	1542	1656	1572.8	0	0	0	0	0	0		1717	116508	119846	119665	120445	120445	119382	5255	5431	5169	5169	5206	5246	899	854	666	666	706	758.2
1718	224920	226703	217032	212585	233497	222947	1562	1628	1499	1545	1677	1582.2	0	0	0	0	0	0		1718	116835	120261	120049	120830	120830	119761	5250	5455	5186	5186	5242	5263.8	902	860	670	670	707	761.8
1719	225722	227557	217780	213363	234399	223764	1581	1619	1508	1547	1697	1590.4	0	0	0	0	0	0		1719	117210	120679	120450	121239	121239	120163	5252	5444	5203	5203	5248	5270	902	866	676	676	706	765.2
1720	226555	228375	218624	214162	235262	224596	1587	1620	1506	1550	1711	1594.8	0	0	0	0	0	0		1720	117593	121084	120861	121660	121660	120572	5266	5456	5232	5232	5269	5291	903	866	679	679	706	766.6
1721	227366	229216	219448	214988	236167	225437	1565	1630	1507	1572	1711	1597	0	0	0	0	0	0		1721	118023	121480	121264	122047	122047	120972	5284	5476	5251	5251	5267	5305.8	911	871	686	686	711	773
1722	228193	230058	220277	215769	237000	226259	1562	1632	1513	1549	1714	1594	0	0	0	0	0	0		1722	118403	121870	121683	122463	122463	121376	5305	5505	5273	5273	5288	5328.8	913	873	686	686	712	774
1723	229011	230952	221120	216584	237892	227112	1576	1636	1506	1564	1725	1601.4	0	0	0	0	0	0		1723	118802	122290	122099	122927	122927	121809	5298	5547	5282	5282	5328	5347.4	916	873	689	689	714	776.2
1724	229862	231788	221955	217436	238797	227968	1599	1651	1510	1572	1722	1610.8	0	0	0	0	0	0		1724	119211	122709	122495	123327	123327	122214	5326	5566	5283	5283	5331	5357.8	915	875	692	692	717	778.2
1725	230724	232605	222778	218284	239609	228800	1596	1674	1523	1579	1725	1619.4	0	0	0	0	0	0		1725	119619	123104	122903	123738	123738	122620	5340	5575	5300	5300	5342	5371.4	918	882	688	688	723	779.8
1726	231572	233487	223642	219099	240532	229666	1607	1663	1528	1586	1724	1621.6	0	0	0	0	0	0		1726	119982	123522	123337	124135	124135	123022	5349	5602	5328	5328	5354	5392.2	920	883	688	688	726	781
1727	232515	234349	224485	219879	241382	230522	1621	1666	1534	1580	1723	1624.8	0	0	0	0	0	0		1727	120361	123944	123706	124519	124519	123410	5338	5616	5348	5348	5364	5402.8	925	885	693	693	729	785
1728	233432	235197	225348	220674	242299	231390	1643	1696	1555	1583	1704	1636.2	0	0	0	0	0	0		1728	120753	124370	124133	124931	124931	123824	5362	5656	5363	5363	5413	5431.4	924	889	693	693	730	785.8
1729	234322	236015	226164	221477	243184	232232	1664	1697	1557	1590	1690	1639.6	0	0	0	0	0	0		1729	121198	124783	124554	125370	125370	124255	5384	5653	5389	5389	5443	5451.6	925	890	700	700	733	789.6
1730	235284	236843	226963	222321	244099	233102	1684	1680	1573	1594	1699	1646	0	0	0	0	0	0		1730	121586	125155	124956	125750	125750	124639	5409	5658	5426	5426	5450	5473.8	930	895	704	704	734	793.4
1731	236139	237738	227795	223094	244990	233951	1700	1672	1585	1604	1701	1652.4	0	0	0	0	0	0		1731	122009	125587	125380	126147	126147	125054	5437	5664	5458	5458	5454	5494.2	938	900	706	706	737	797.4
1732	237017	238609	228626	223955	245893	234820	1709	1664	1597	1611	1713	1658.8	0	0	0	0	0	0		1732	122393	126066	125783	126622	126622	125497	5456	5689	5484	5484	5513	5525.2	943	904	708	708	743	801.2
1733	237907	239493	229572	224799	246879	235730	1728	1671	1618	1616	1733	1673.2	0	0	0	0	0	0		1733	122785	126439	126210	127053	127053	125908	5469	5690	5509	5509	5528	5541	952	903	711	711	745	804.4
1734	238787	240347	230437	225667	247792	236606	1758	1680	1616	1632	1737	1684.6	0	0	0	0	0	0		1734	123160	126863	126679	127461	127461	126325	5484	5717	5564	5564	5529	5571.6	950	908	715	715	749	807.4
1735	239727	241229	231324	226555	248735	237514	1782	1683	1632	1645	1751	1698.6	0	0	0	0	0	0		1735	123565	127308	127135	127882	127882	126754	5507	5717	5583	5583	5570	5592	953	911	716	716	753	809.8
1736	240616	242202	232201	227378	249668	238413	1793	1692	1652	1670	1747	1710.8	0	0	0	0	0	0		1736	123917	127702	127571	128284	128284	127152	5518	5734	5611	5611	5580	5610.8	953	916	714	714	755	810.4
1737	241535	243051	233065	228263	250600	239303	1798	1699	1646	1664	1756	1712.6	0	0	0	0	0	0		1737	124288	128115	128010	128739	128739	127578	5527	5773	5625	5625	5602	5630.4	956	920	712	712	753	810.6
1738	242382	243941	233976	229133	251542	240195	1809	1703	1658	1661	1786	1723.4	0	0	0	0	0	0		1738	124701	128539	128433	129157	129157	127997	5544	5787	5650	5650	5641	5654.4	958	927	715	715	754	813.8
1739	243346	244876	234851	229969	252484	241105	1833	1706	1667	1661	1790	1731.4	0	0	0	0	0	0		1739	125116	128929	128844	129576	129576	128408	5574	5808	5665	5665	5658	5674	964	930	719	719	753	817
1740	244232	245764	235718	230889	253485	242018	1833	1725	1662	1676	1816	1742.4	0	0	0	0	0	0		1740	125521	129352	129216	129999	129999	128817	5584	5850	5656	5656	5656	5680.4	969	932	723	723	756	820.6
1741	245139	246670	236558	231789	254381	242907	1850	1729	1664	1682	1810	1747	0	0	0	0	0	0		1741	125900	129786	129657	130442	130442	129245	5631	5857	5684	5684	5685	5708.2	971	938	727	727	765	825.6
1742	246025	247556	237455	232611	255355	243800	1847	1721	1655	1692	1805	1744	0	0	0	0	0	0		1742	126331	130209	130102	130904	130904	129690	5635	5864	5730	5730	5718	5735.4	971	947	733	733	771	831
1743	246902	248519	238330	233481	256322	244711	1839	1736	1667	1693	1816	1750.2	0	0	0	0	0	0		1743	126758	130685	130535	131323	131323	130125	5673	5908	5730	5730	5733	5754.8	975	952	735	735	770	833.4
1744	247830	249449	239232	234408	257267	245637	1846	1739	1677	1690	1824	1755.2	0	0	0	0	0	0		1744	127177	131142	130947	131754	131754	130555	5702	5962	5726	5726	5745	5772.2	977	955	742	742	771	837.4
1745	248748	250415	240073	235259	258256	246550	1841	1748	1666	1690	1836	1756.2	0	0	0	0	0	0		1745	127600	131619	131330	132189	132189	130985	5718	5979	5724	5724	5778	5784.6	981	962	748	748	772	842.2
1746	249687	251327	240948	236132	259182	247455	1836	1766	1672	1701	1836	1762.2	0	0	0	0	0	0		1746	128041	132042	131773	132647	132647	131430	5756	6003	5734	5734	5816	5808.6	979	960	750	750	774	842.6
1747	250551	252289	241811	237061	260160	248374	1828	1789	1681	1730	1835	1772.6	0	0	0	0	0	0		1747	128502	132540	132219	133071	133071	131881	5791	6045	5767	5767	5836	5841.2	985	961	752	752	778	845.6
1748	251456	253176	242781	237934	261125	249294	1825	1797	1695	1718	1848	1776.6	0	0	0	0	0	0		1748	128948	133003	132641	133476	133476	132309	5822	6059	5798	5798	5856	5866.6	987	963	750	750	780	846
1749	252442	254095	243707	238770	262117	250226	1830	1790	1721	1731	1850	1784.4	0	0	0	0	0	0		1749	129357	133436	133046	133906	133906	132730	5824	6063	5808	5808	5888	5878.2	990	964	751	751	786	848.4
1750	253348	255078	244554	239754	263159	251179	1832	1811	1704	1729	1896	1794.4	0	0	0	0	0	0		1750	129738	133910	133478	134357	134357	133168	5838	6091	5824	5824	5926	5900.6	996	963	753	753	785	850
1751	254286	255974	245493	240657	264116	252105	1834	1811	1728	1739	1902	1802.8	0	0	0	0	0	0		1751	130174	134311	133923	134786	134786	133596	5852	6091	5841	5841	5937	5912.4	999	965	755	755	788	852.4
1752	255231	256897	246397	241613	265068	253041	1845	1843	1729	1764	1916	1819.4	0	0	0	0	0	0		1752	130599	134786	134375	135235	135235	134046	5859	6132	5871	5871	5944	5935.4	1002	973	764	764	795	859.6
1753	256208	257870	247357	242535	266105	254015	1832	1852	1729	1771	1927	1822.2	0	0	0	0	0	0		1753	131005	135169	134843	135672	135672	134472	5859	6150	5893	5893	5967	5952.4	1004	979	767	767	794	862.2
1754	257121	258828	248290	243460	267107	254961	1827	1867	1742	1764	1934	1826.8	0	0	0	0	0	0		1754	131419	135638	135324	136104	136104	134918	5870	6192	5915	5915	6001	5978.6	1009	986	773	773	804	869
1755	258104	259778	249185	244361	268060	255898	1839	1862	1746	1765	1939	1830.2	0	0	0	0	0	0		1755	131862	136134	135786	136599	136599	135396	5891	6226	5951	5951	6040	6011.8	1013	990	777	777	808	873
1756	259069	260834	250145	245271	269094	256883	1837	1886	1741	1799	1932	1839	0	0	0	0	0	0		1756	132321	136603	136236	137054	137054	135854	5913	6234	5958	5958	6064	6025.4	1016	996	780	780	813	877
1757	260057	261787	251088	246270	270062	257853	1867	1895	1752	1825	1948	1857.4	0	0	0	0	0	0		1757	132790	137038	136680	137469	137469	136289	5924	6254	5977	5977	6060	6038.4	1019	994	784	784	815	879.2
1758	260983	262806	252028	247154	271092	258813	1879	1907	1748	1821	1961	1863.2	0	0	0	0	0	0		1758	133216	137486	137109	137892	137892	136719	5942	6283	5982	5982	6073	6052.4	1024	997	786	786	816	881.8
1759	261958	263788	252991	248075	272101	259783	1881	1924	1761	1829	1958	1870.6	0	0	0	0	0	0		1759	133668	137950	137580	138335	138335	137174	5979	6289	6000	6000	6095	6072.6	1028	999	789	789	821	885.2
1760	262895	264777	253953	249027	273162	260763	1870	1940	1783	1823	1991	1881.4	0	0	0	0	0	0		1760	134117	138388	138035	138804	138804	137630	5980	6307	6004	6004	6136	6086.2	1034	1007	789	789	827	889.2
1761	263907	265706	254948	249944	274171	261735	1882	1927	1811	1806	1993	1883.8	0	0	0	0	0	0		1761	134594	138823	138489	139241	139241	138078	6015	6314	6025	6025	6123	6100.4	1042	1011	790	790	826	891.8
1762	264950	266674	255890	250880	275191	262717	1903	1933	1817	1828	2000	1896.2	0	0	0	0	0	0		1762	135098	139237	138924	139695	139695	138530	6029	6323	6027	6027	6135	6108.2	1043	1017	796	796	829	896.2
1763	265940	267627	256835	251758	276302	263692	1914	1943	1816	1829	2025	1905.4	0	0	0	0	0	0		1763	135535	139699	139330	140199	140199	138992	6048	6354	6030	6030	6162	6124.8	1046	1018	800	800	829	898.6
1764	266899	268618	257822	252689	277360	264678	1927	1939	1828	1843	2024	1912.2	0	0	0	0	0	0		1764	135994	140170	139838	140607	140607	139443	6079	6361	6046	6046	6160	6138.4	1056	1021	808	808	830	904.6
1765	267877	269554	258792	253639	278433	265659	1949	1928	1817	1847	2030	1914.2	0	0	0	0	0	0		1765	136472	140633	140313	141092	141092	139920	6114	6374	6069	6069	6193	6163.8	1060	1023	809	809	832	906.6
1766	268856	270573	259750	254569	279500	266650	1940	1937	1818	1841	2026	1912.4	0	0	0	0	0	0		1766	136952	141112	140788	141583	141583	140404	6121	6392	6105	6105	6205	6185.6	1063	1028	811	811	834	909.4
1767	269880	271619	260683	255521	280519	267644	1945	1944	1822	1863	2054	1925.6	0	0	0	0	0	0		1767	137413	141580	141300	142023	142023	140868	6149	6392	6145	6145	6261	6218.4	1068	1030	810	810	837	911
1768	270888	272596	261658	256472	281613	268645	1974	1931	1833	1853	2072	1932.6	0	0	0	0	0	0		1768	137883	142020	141779	142499	142499	141336	6175	6408	6147	6147	6294	6234.2	1077	1033	810	810	841	914.2
1769	271895	273706	262671	257442	282721	269687	2003	1954	1855	1866	2073	1950.2	0	0	0	0	0	0		1769	138369	142510	142244	142963	142963	141810	6207	6422	6168	6168	6290	6251	1078	1037	809	809	843	915.2
1770	272908	274634	263623	258320	283765	270650	2011	1949	1865	1868	2089	1956.4	0	0	0	0	0	0		1770	138835	143013	142714	143386	143386	142267	6226	6418	6175	6175	6299	6258.6	1088	1042	816	816	846	921.6
1771	273916	275704	264602	259265	284815	271660	1997	1961	1860	1858	2103	1955.8	0	0	0	0	0	0		1771	139312	143446	143166	143880	143880	142737	6248	6445	6205	6205	6332	6287	1092	1045	822	822	849	926
1772	274936	276744	265555	260251	285903	272678	2000	1960	1863	1866	2102	1958.2	0	0	0	0	0	0		1772	139778	143972	143647	144312	144312	143204	6263	6476	6218	6218	6340	6303	1094	1053	822	822	855	929.2
1773	275986	277771	266505	261252	286976	273698	1997	1984	1866	1876	2097	1964	0	0	0	0	0	0		1773	140199	144424	144130	144808	144808	143674	6286	6490	6244	6244	6366	6326	1097	1057	828	828	862	934.4
1774	276973	278795	267511	262242	288014	274707	1998	1982	1868	1891	2106	1969	0	0	0	0	0	0		1774	140679	144910	144658	145279	145279	144161	6308	6502	6259	6259	6371	6339.8	1100	1066	829	829	865	937.8
1775	278015	279884	268561	263142	289125	275745	1981	2012	1857	1911	2114	1975	0	0	0	0	0	0		1775	141176	145385	145156	145760	145760	144647	6339	6511	6299	6299	6398	6369.2	1110	1070	835	835	867	943.4
1776	279049	280898	269592	264109	290251	276780	1975	2018	1873	1913	2110	1977.8	0	0	0	0	0	0		1776	141614	145809	145661	146224	146224	145106	6349	6524	6323	6323	6413	6386.4	1114	1072	834	834	872	945.2
1777	280106	281973	270593	265149	291290	277822	1994	2038	1874	1917	2101	1984.8	0	0	0	0	0	0		1777	142090	146287	146160	146706	146706	145590	6363	6559	6354	6354	6432	6412.4	1117	1078	837	837	875	948.8
1778	281148	283030	271575	266141	292410	278861	1995	2045	1881	1936	2118	1995	0	0	0	0	0	0		1778	142582	146789	146633	147177	147177	146072	6380	6593	6371	6371	6429	6428.8	1124	1085	837	837	880	952.6
1779	282193	284143	272655	267146	293516	279931	2012	2058	1897	1947	2128	2008.4	0	0	0	0	0	0		1779	143076	147247	147119	147647	147647	146547	6405	6631	6422	6422	6427	6461.4	1124	1087	839	839	880	953.8
1780	283327	285227	273733	268171	294616	281015	2032	2072	1920	1959	2131	2022.8	0	0	0	0	0	0		1780	143553	147737	147611	148141	148141	147037	6436	6652	6435	6435	6465	6484.6	1129	1092	843	843	878	957
1781	284339	286321	274783	269133	295740	282063	2038	2088	1923	1963	2133	2029	0	0	0	0	0	0		1781	144016	148234	148121	148668	148668	147541	6450	6685	6472	6472	6475	6510.8	1133	1092	848	848	881	960.4
1782	285388	287435	275862	270168	296857	283142	2034	2095	1931	1972	2139	2034.2	0	0	0	0	0	0		1782	144503	148686	148672	149147	149147	148031	6485	6698	6490	6490	6487	6530	1143	1096	856	856	892	968.6
1783	286447	288549	276839	271134	297941	284182	2035	2093	1936	1983	2155	2040.4	0	0	0	0	0	0		1783	145003	149134	149150	149658	149658	148521	6521	6708	6517	6517	6516	6555.8	1147	1098	856	856	894	970.2
1784	287500	289662	277885	272199	299059	285261	2052	2106	1945	1990	2154	2049.4	0	0	0	0	0	0		1784	145442	149646	149651	150113	150113	148993	6535	6717	6535	6535	6520	6568.4	1151	1103	858	858	893	972.6
1785	288585	290744	278913	273206	300151	286320	2076	2123	1951	1994	2159	2060.6	0	0	0	0	0	0		1785	145934	150106	150146	150598	150598	149476	6572	6748	6545	6545	6532	6588.4	1152	1116	863	863	896	978
1786	289615	291834	279945	274228	301233	287371	2081	2114	1962	1996	2176	2065.8	0	0	0	0	0	0		1786	146457	150660	150655	151103	151103	149996	6585	6774	6588	6588	6560	6619	1155	1120	864	864	897	980
1787	290657	292889	280945	275260	302317	288414	2072	2104	1967	2006	2174	2064.6	0	0	0	0	0	0		1787	146953	151130	151179	151622	151622	150501	6621	6772	6649	6649	6609	6660	1160	1125	870	870	899	984.8
1788	291830	293973	282040	276292	303438	289515	2076	2121	1969	1998	2179	2068.6	0	0	0	0	0	0		1788	147430	151611	151651	152097	152097	150977	6642	6782	6645	6645	6641	6671	1163	1130	873	873	900	987.8
1789	292945	295029	283153	277306	304577	290602	2092	2125	1971	2018	2207	2082.6	0	0	0	0	0	0		1789	147874	152093	152156	152599	152599	151464	6675	6800	6662	6662	6663	6692.4	1163	1130	878	878	905	990.8
1790	294091	296077	284199	278298	305649	291663	2109	2130	1988	2012	2212	2090.2	0	0	0	0	0	0		1790	148355	152584	152674	153121	153121	151971	6692	6839	6696	6696	6689	6722.4	1169	1132	883	883	904	994.2
1791	295134	297176	285317	279333	306764	292745	2093	2130	2011	2011	2219	2092.8	0	0	0	0	0	0		1791	148826	153031	153180	153645	153645	152465	6702	6861	6712	6712	6700	6737.4	1172	1140	886	886	905	997.8
1792	296169	298320	286429	280386	307918	293844	2102	2144	2012	2028	2228	2102.8	0	0	0	0	0	0		1792	149346	153562	153690	154149	154149	152979	6715	6884	6743	6743	6726	6762.2	1174	1142	887	887	907	999.4
1793	297262	299406	287448	281437	309021	294915	2101	2146	2018	2041	2230	2107.2	0	0	0	0	0	0		1793	149830	154055	154195	154662	154662	153481	6738	6895	6777	6777	6744	6786.2	1173	1141	890	890	907	1000.2
1794	298425	300498	288520	282547	310103	296019	2107	2139	2036	2045	2219	2109.2	0	0	0	0	0	0		1794	150349	154578	154677	155180	155180	153993	6765	6916	6816	6816	6777	6818	1180	1153	888	888	917	1005.2
1795	299550	301621	289676	283573	311233	297131	2105	2167	2049	2075	2202	2119.6	0	0	0	0	0	0		1795	150875	155090	155154	155696	155696	154502	6808	6984	6821	6821	6795	6845.8	1182	1160	892	892	919	1009
1796	300669	302760	290743	284622	312418	298242	2108	2166	2052	2068	2232	2125.2	0	0	0	0	0	0		1796	151398	155633	155659	156185	156185	155012	6832	7015	6840	6840	6814	6868.2	1185	1165	891	891	922	1010.8
1797	301787	303944	291820	285715	313647	299383	2102	2160	2059	2092	2240	2130.6	0	0	0	0	0	0		1797	151918	156195	156177	156733	156733	155551	6859	7059	6876	6876	6853	6904.6	1191	1171	894	894	925	1015
1798	302866	305096	292959	286785	314817	300505	2097	2162	2083	2094	2242	2135.6	0	0	0	0	0	0		1798	152426	156711	156675	157298	157298	156082	6882	7061	6881	6881	6890	6919	1196	1177	896	896	929	1018.8
1799	303991	306242	293985	287879	315943	301608	2102	2164	2092	2118	2223	2139.8	0	0	0	0	0	0		1799	152930	157285	157219	157783	157783	156600	6922	7119	6894	6894	6907	6947.2	1199	1178	897	897	934	1021
1800	305161	307423	295085	288964	317095	302746	2112	2206	2085	2137	2259	2159.8	0	0	0	0	0	0		1800	153455	157848	157732	158284	158284	157121	6952	7135	6914	6914	6931	6969.2	1200	1181	900	900	932	1022.6
1801	306314	308614	296169	290046	318269	303882	2135	2222	2092	2155	2284	2177.6	0	0	0	0	0	0		1801	153953	158343	158314	158857	158857	157665	6978	7152	6952	6952	6954	6997.6	1202	1182	906	906	939	1027
1802	307520	309807	297228	291089	319468	305022	2126	2214	2100	2164	2289	2178.6	0	0	0	0	0	0		1802	154451	158855	158852	159365	159365	158178	6985	7168	6955	6955	6985	7009.6	1198	1181	907	907	941	1026.8
1803	308648	310944	298358	292179	320713	306168	2138	2229	2101	2149	2297	2182.8	0	0	0	0	0	0		1803	154946	159382	159389	159899	159899	158703	7003	7208	6960	6960	7018	7029.8	1205	1183	908	908	943	1029.4
1804	309861	312105	299406	293311	321903	307317	2161	2234	2111	2156	2327	2197.8	0	0	0	0	0	0		1804	155465	159911	159905	160436	160436	159231	7027	7237	6966	6966	7044	7048	1210	1187	913	913	946	1033.8
1805	310992	313302	300522	294411	323115	308468	2182	2253	2107	2183	2315	2208	0	0	0	0	0	0		1805	156010	160447	160434	160967	160967	159765	7071	7289	6984	6984	7078	7081.2	1212	1191	916	916	954	1037.8
1806	312191	314473	301705	295494	324315	309636	2204	2247	2107	2184	2308	2210	0	0	0	0	0	0		1806	156509	160921	160931	161523	161523	160281	7073	7312	6997	6997	7116	7099	1220	1195	923	923	955	1043.2
1807	313296	315682	302882	296616	325614	310818	2212	2266	2114	2190	2334	2223.2	0	0	0	0	0	0		1807	157042	161436	161493	162040	162040	160810	7110	7352	7003	7003	7135	7120.6	1220	1205	926	926	957	1046.8
1808	314426	316911	304007	297691	326824	311972	2208	2276	2121	2179	2344	2225.6	0	0	0	0	0	0		1808	157574	161924	162039	162590	162590	161343	7141	7377	7025	7025	7168	7147.2	1218	1211	927	927	956	1047.8
1809	315619	318151	305179	298795	328023	313153	2224	2263	2145	2170	2347	2229.8	0	0	0	0	0	0		1809	158069	162430	162559	163130	163130	161864	7148	7388	7046	7046	7205	7166.6	1224	1219	928	928	961	1052
1810	316839	319353	306350	299936	329249	314345	2237	2272	2164	2185	2356	2242.8	0	0	0	0	0	0		1810	158638	162973	163137	163732	163732	162442	7184	7420	7060	7060	7242	7193.2	1234	1227	933	933	966	1058.6
1811	318110	320633	307469	301135	330449	315559	2279	2316	2189	2204	2365	2270.6	0	0	0	0	0	0		1811	159128	163519	163661	164264	164264	162967	7225	7437	7083	7083	7267	7219	1235	1235	941	941	965	1063.4
1812	319350	321878	308580	302267	331698	316755	2289	2315	2181	2226	2357	2273.6	0	0	0	0	0	0		1812	159634	164086	164188	164774	164774	163491	7244	7459	7145	7145	7277	7254	1246	1244	947	947	973	1071.4
1813	320533	323069	309690	303364	332961	317923	2303	2323	2184	2210	2367	2277.4	0	0	0	0	0	0		1813	160161	164608	164710	165343	165343	164033	7272	7499	7161	7161	7324	7283.4	1249	1244	950	950	978	1074.2
1814	321746	324250	310875	304469	334198	319108	2319	2344	2215	2236	2356	2294	0	0	0	0	0	0		1814	160649	165078	165248	165885	165885	164549	7278	7490	7190	7190	7347	7299	1251	1248	955	955	984	1078.6
1815	322977	325430	312053	305617	335436	320303	2331	2350	2222	2228	2369	2300	0	0	0	0	0	0		1815	161217	165583	165820	166438	166438	165099	7307	7495	7224	7224	7402	7330.4	1255	1248	961	961	995	1084
1816	324216	326689	313207	306737	336635	321497	2360	2354	2221	2237	2362	2306.8	0	0	0	0	0	0		1816	161752	166098	166364	166959	166959	165626	7321	7506	7249	7249	7408	7346.6	1260	1253	973	973	995	1090.8
1817	325421	327892	314413	307845	337836	322681	2361	2340	2221	2253	2360	2307	0	0	0	0	0	0		1817	162253	166614	166885	167521	167521	166159	7334	7531	7240	7240	7419	7352.8	1265	1264	981	981	995	1097.2
1818	326577	329167	315599	308959	339082	323877	2351	2345	2213	2264	2373	2309.2	0	0	0	0	0	0		1818	162848	167179	167411	168043	168043	166705	7372	7542	7240	7240	7443	7367.4	1271	1267	982	982	994	1099.2
1819	327786	330416	316795	310043	340285	325065	2384	2357	2237	2248	2398	2324.8	0	0	0	0	0	0		1819	163407	167732	167943	168610	168610	167260	7384	7598	7241	7241	7492	7391.2	1279	1268	979	979	1001	1101.2
1820	328941	331650	317996	311167	341588	326268	2394	2360	2245	2248	2413	2332	0	0	0	0	0	0		1820	163920	168322	168496	169202	169202	167828	7424	7644	7244	7244	7523	7415.8	1283	1272	981	981	1005	1104.4
1821	330187	332892	319159	312297	342877	327482	2420	2372	2252	2231	2415	2338	0	0	0	0	0	0		1821	164395	168846	169031	169745	169745	168352	7452	7655	7269	7269	7523	7433.6	1288	1271	983	983	1010	1107
1822	331395	334150	320340	313461	344123	328694	2441	2390	2279	2250	2429	2357.8	0	0	0	0	0	0		1822	164948	169382	169534	170304	170304	168894	7489	7665	7278	7278	7529	7447.8	1293	1276	986	986	1016	1111.4
1823	332656	335386	321453	314657	345362	329903	2441	2402	2284	2259	2430	2363.2	0	0	0	0	0	0		1823	165497	169969	170065	170849	170849	169446	7522	7702	7290	7290	7559	7472.6	1298	1282	988	988	1024	1116
1824	333866	336626	322697	315891	346552	331126	2432	2413	2279	2275	2434	2366.6	0	0	0	0	0	0		1824	166061	170527	170602	171454	171454	170020	7547	7698	7312	7312	7587	7491.2	1299	1285	991	991	1027	1118.6
1825	335112	337872	323886	317090	347830	332358	2420	2413	2286	2264	2436	2363.8	0	0	0	0	0	0		1825	166602	171064	171160	171998	171998	170564	7587	7712	7324	7324	7603	7510	1306	1287	993	993	1034	1122.6
1826	336439	339133	325056	318339	349082	333610	2428	2431	2311	2292	2459	2384.2	0	0	0	0	0	0		1826	167148	171634	171730	172566	172566	171129	7593	7705	7324	7324	7613	7511.8	1312	1289	999	999	1038	1127.4
1827	337704	340369	326251	319590	350436	334870	2443	2439	2324	2298	2479	2396.6	0	0	0	0	0	0		1827	167679	172201	172259	173162	173162	171693	7645	7748	7329	7329	7644	7539	1316	1300	1000	1000	1050	1133.2
1828	338999	341671	327409	320748	351718	336109	2456	2458	2327	2305	2480	2405.2	0	0	0	0	0	0		1828	168227	172754	172856	173732	173732	172260	7677	7775	7371	7371	7658	7570.4	1321	1304	999	999	1054	1135.4
1829	340270	342952	328581	321931	353006	337348	2465	2480	2332	2313	2492	2416.4	0	0	0	0	0	0		1829	168779	173296	173452	174308	174308	172829	7709	7797	7405	7405	7678	7598.8	1323	1305	1004	1004	1059	1139
1830	341566	344261	329872	323096	354294	338618	2478	2470	2343	2335	2506	2426.4	0	0	0	0	0	0		1830	169342	173842	173958	174871	174871	173377	7751	7830	7424	7424	7703	7626.4	1330	1313	1008	1008	1062	1144.2
1831	342879	345529	331110	324306	355618	339888	2480	2483	2348	2361	2516	2437.6	0	0	0	0	0	0		1831	169898	174411	174509	175497	175497	173962	7773	7872	7456	7456	7754	7662.2	1334	1322	1012	1012	1071	1150.2
1832	344172	346811	332297	325412	356912	341121	2504	2473	2350	2382	2513	2444.4	0	0	0	0	0	0		1832	170438	174954	175076	176107	176107	174536	7792	7883	7493	7493	7804	7693	1342	1326	1019	1019	1072	1155.6
1833	345421	348057	333465	326678	358225	342369	2482	2473	2351	2410	2537	2450.6	0	0	0	0	0	0		1833	171012	175557	175630	176722	176722	175129	7833	7898	7510	7510	7827	7715.6	1347	1329	1023	1023	1076	1159.6
1834	346767	349278	334712	327941	359628	343665	2473	2483	2354	2431	2541	2456.4	0	0	0	0	0	0		1834	171539	176123	176244	177327	177327	175712	7858	7908	7546	7546	7855	7742.6	1355	1332	1029	1029	1080	1165
1835	348041	350546	335963	329204	360989	344949	2473	2476	2365	2442	2549	2461	0	0	0	0	0	0		1835	172059	176710	176842	177869	177869	176270	7879	7940	7575	7575	7866	7767	1357	1335	1029	1029	1080	1166
1836	349354	351850	337210	330504	362397	346263	2476	2479	2369	2461	2568	2470.6	0	0	0	0	0	0		1836	172631	177276	177469	178425	178425	176845	7885	7958	7628	7628	7862	7792.2	1362	1344	1036	1036	1081	1171.8
1837	350657	353133	338455	331710	363810	347553	2482	2482	2388	2454	2580	2477.2	0	0	0	0	0	0		1837	173234	177892	178026	179060	179060	177454	7917	8014	7608	7608	7910	7811.4	1374	1353	1039	1039	1086	1178.2
1838	351964	354472	339787	332998	365119	348868	2484	2468	2400	2459	2580	2478.2	0	0	0	0	0	0		1838	173764	178497	178593	179680	179680	178043	7905	8045	7631	7631	7934	7829.2	1377	1356	1042	1042	1091	1181.6
1839	353258	355806	341128	334229	366477	350180	2506	2483	2414	2486	2604	2498.6	0	0	0	0	0	0		1839	174332	179057	179177	180257	180257	178616	7909	8074	7630	7630	7962	7841	1386	1363	1042	1042	1091	1184.8
1840	354615	357145	342411	335461	367867	351500	2505	2505	2404	2479	2619	2502.4	0	0	0	0	0	0		1840	174901	179713	179772	180839	180839	179213	7966	8128	7662	7662	7991	7881.8	1390	1370	1054	1054	1092	1192
1841	355883	358451	343749	336712	369226	352804	2489	2527	2427	2477	2633	2510.6	0	0	0	0	0	0		1841	175451	180310	180386	181457	181457	179812	7989	8198	7685	7685	8025	7916.4	1390	1375	1068	1068	1098	1199.8
1842	357238	359838	345053	338005	370633	354153	2498	2545	2441	2492	2660	2527.2	0	0	0	0	0	0		1842	176038	180896	180984	182062	182062	180408	8044	8230	7703	7703	8040	7944	1397	1378	1071	1071	1101	1203.6
1843	358610	361209	346302	339290	371955	355473	2519	2557	2453	2512	2669	2542	0	0	0	0	0	0		1843	176644	181488	181545	182690	182690	181011	8068	8263	7709	7709	8080	7965.8	1402	1387	1075	1075	1112	1210.2
1844	359950	362529	347641	340540	373371	356806	2524	2585	2488	2511	2708	2563.2	0	0	0	0	0	0		1844	177232	182024	182159	183290	183290	181599	8111	8276	7734	7734	8112	7993.4	1409	1386	1083	1083	1122	1216.6
1845	361272	363925	348994	341777	374719	358137	2553	2599	2497	2527	2697	2574.6	0	0	0	0	0	0		1845	177832	182655	182812	183924	183924	182229	8144	8322	7755	7755	8160	8027.2	1409	1386	1089	1089	1125	1219.6
1846	362658	365314	350277	343057	376046	359470	2554	2596	2522	2555	2711	2587.6	0	0	0	0	0	0		1846	178386	183234	183453	184583	184583	182848	8157	8374	7811	7811	8196	8069.8	1418	1397	1092	1092	1131	1226
1847	363942	366781	351568	344365	377427	360817	2583	2655	2525	2581	2696	2608	0	0	0	0	0	0		1847	179034	183839	184042	185173	185173	183452	8214	8408	7854	7854	8212	8108.4	1426	1398	1097	1097	1137	1231
1848	365295	368150	352885	345655	378840	362165	2598	2660	2536	2591	2696	2616.2	0	0	0	0	0	0		1848	179574	184398	184651	185796	185796	184043	8240	8443	7892	7892	8231	8139.6	1435	1402	1100	1100	1141	1235.6
1849	366657	369532	354136	346928	380372	363525	2614	2676	2538	2600	2710	2627.6	0	0	0	0	0	0		1849	180210	185004	185299	186411	186411	184667	8275	8483	7930	7930	8259	8175.4	1439	1408	1101	1101	1146	1239
1850	367996	370887	355445	348171	381802	364860	2642	2708	2539	2602	2720	2642.2	0	0	0	0	0	0		1850	180845	185613	185900	187089	187089	185307	8287	8510	7941	7941	8306	8197	1450	1413	1106	1106	1149	1244.8
1851	369413	372181	356726	349439	383220	366196	2660	2705	2540	2606	2744	2651	0	0	0	0	0	0		1851	181423	186241	186543	187695	187695	185919	8305	8570	7974	7974	8343	8233.2	1459	1422	1110	1110	1161	1252.4
1852	370799	373622	358108	350747	384705	367596	2650	2732	2573	2588	2754	2659.4	0	0	0	0	0	0		1852	182003	186865	187136	188323	188323	186530	8335	8598	8016	8016	8391	8271.2	1463	1433	1120	1120	1166	1260.4
1853	372175	374923	359456	352009	386068	368926	2658	2725	2581	2586	2737	2657.4	0	0	0	0	0	0		1853	182620	187518	187684	188946	188946	187143	8377	8630	8031	8031	8414	8296.6	1463	1442	1122	1122	1171	1264
1854	373538	376302	360783	353281	387528	370286	2663	2726	2595	2592	2758	2666.8	0	0	0	0	0	0		1854	183179	188158	188298	189532	189532	187740	8392	8643	8058	8058	8419	8314	1466	1449	1127	1127	1174	1268.6
1855	374949	377769	362069	354633	388924	371669	2696	2748	2587	2603	2781	2683	0	0	0	0	0	0		1855	183800	188762	188865	190153	190153	188347	8432	8660	8052	8052	8442	8327.6	1469	1456	1128	1128	1179	1272
1856	376393	379160	363354	355922	390341	373034	2717	2727	2592	2592	2793	2684.2	0	0	0	0	0	0		1856	184423	189428	189493	190756	190756	188971	8474	8721	8082	8082	8454	8362.6	1479	1467	1131	1131	1189	1279.4
1857	377741	380548	364710	357301	391779	374416	2719	2737	2601	2616	2808	2696.2	0	0	0	0	0	0		1857	185072	190001	190072	191382	191382	189582	8517	8737	8096	8096	8500	8389.2	1483	1472	1131	1131	1188	1281
1858	379169	382001	366099	358579	393207	375811	2710	2717	2611	2646	2787	2694.2	0	0	0	0	0	0		1858	185658	190609	190707	191985	191985	190189	8537	8729	8121	8121	8513	8404.2	1495	1478	1138	1138	1191	1288
1859	380464	383446	367530	359897	394723	377212	2697	2709	2631	2654	2799	2698	0	0	0	0	0	0		1859	186277	191216	191355	192656	192656	190832	8561	8756	8164	8164	8550	8439	1502	1480	1144	1144	1198	1293.6
1860	381900	384817	368923	361249	396183	378614	2721	2710	2650	2656	2806	2708.6	0	0	0	0	0	0		1860	186919	191806	191968	193358	193358	191482	8599	8760	8194	8194	8591	8467.6	1513	1481	1147	1147	1206	1298.8
1861	383370	386261	370311	362553	397661	380031	2735	2693	2647	2658	2805	2707.6	0	0	0	0	0	0		1861	187529	192451	192518	194022	194022	192108	8613	8819	8189	8189	8631	8488.2	1517	1487	1146	1146	1214	1302
1862	384833	387715	371695	363901	399122	381453	2741	2710	2640	2655	2822	2713.6	0	0	0	0	0	0		1862	188126	193102	193169	194669	194669	192747	8665	8872	8219	8219	8642	8523.4	1519	1491	1156	1156	1218	1308
1863	386239	389175	373010	365243	400604	382854	2769	2724	2652	2652	2825	2724.4	0	0	0	0	0	0		1863	188795	193734	193779	195308	195308	193385	8712	8879	8229	8229	8675	8544.8	1522	1492	1163	1163	1225	1313
1864	387665	390662	374396	366598	402177	384300	2759	2734	2692	2678	2831	2738.8	0	0	0	0	0	0		1864	189408	194410	194422	195926	195926	194018	8730	8921	8271	8271	8700	8578.6	1526	1493	1168	1168	1228	1316.6
1865	389157	392155	375754	367901	403621	385718	2799	2761	2702	2686	2843	2758.2	0	0	0	0	0	0		1865	190055	195087	195071	196589	196589	194678	8774	8955	8272	8272	8761	8606.8	1533	1497	1171	1171	1237	1321.8
1866	390596	393606	377095	369235	405125	387131	2802	2767	2705	2686	2846	2761.2	0	0	0	0	0	0		1866	190680	195769	195673	197258	197258	195328	8794	8991	8288	8288	8792	8630.6	1537	1504	1176	1176	1243	1327.2
1867	392124	395112	378507	370599	406639	388596	2819	2782	2710	2690	2873	2774.8	0	0	0	0	0	0		1867	191283	196370	196341	197922	197922	195968	8814	8997	8313	8313	8809	8649.2	1540	1505	1178	1178	1250	1330.2
1868	393611	396610	379934	372040	408148	390069	2846	2800	2726	2692	2882	2789.2	0	0	0	0	0	0		1868	191919	197048	196967	198591	198591	196623	8821	9028	8327	8327	8826	8665.8	1545	1510	1175	1175	1252	1331.4
1869	395072	398126	381304	373396	409624	391504	2844	2816	2734	2717	2865	2795.2	0	0	0	0	0	0		1869	192508	197740	197628	199218	199218	197262	8814	9046	8337	8337	8837	8674.2	1551	1510	1176	1176	1252	1333
1870	396600	399629	382780	374861	411173	393009	2853	2849	2769	2747	2871	2817.8	0	0	0	0	0	0		1870	193134	198384	198240	199854	199854	197893	8868	9075	8344	8344	8838	8693.8	1554	1511	1179	1179	1258	1336.2
1871	398061	401185	384161	376187	412717	394462	2858	2873	2783	2753	2871	2827.6	0	0	0	0	0	0		1871	193780	199012	198867	200504	200504	198533	8899	9085	8371	8371	8870	8719.2	1553	1514	1180	1180	1260	1337.4
1872	399591	402690	385592	377605	414263	395948	2871	2873	2799	2752	2884	2835.8	0	0	0	0	0	0		1872	194372	199686	199530	201167	201167	199184	8952	9117	8399	8399	8901	8753.6	1554	1528	1180	1180	1265	1341.4
1873	401058	404246	387034	379037	415804	397436	2898	2876	2804	2761	2898	2847.4	0	0	0	0	0	0		1873	195031	200325	200190	201774	201774	199819	8977	9129	8431	8431	8911	8775.8	1559	1535	1184	1184	1274	1347.2
1874	402540	405805	388411	380426	417319	398900	2872	2887	2806	2767	2926	2851.6	0	0	0	0	0	0		1874	195672	201003	200856	202439	202439	200482	9000	9185	8488	8488	8963	8824.8	1560	1539	1195	1195	1275	1352.8
1875	404114	407343	389866	381799	418884	400401	2910	2907	2840	2766	2944	2873.4	0	0	0	0	0	0		1875	196351	201640	201526	203068	203068	201131	9049	9202	8542	8542	8961	8859.2	1564	1549	1208	1208	1276	1361
1876	405640	408804	391266	383227	420445	401876	2936	2897	2845	2780	2972	2886	0	0	0	0	0	0		1876	197040	202272	202187	203719	203719	201787	9088	9246	8579	8579	8990	8896.4	1565	1557	1218	1218	1279	1367.4
1877	407137	410292	392764	384651	422001	403369	2940	2905	2873	2790	2970	2895.6	0	0	0	0	0	0		1877	197689	202930	202833	204428	204428	202462	9126	9271	8631	8631	8992	8930.2	1569	1558	1226	1226	1278	1371.4
1878	408685	411783	394218	386142	423647	404895	2957	2890	2873	2806	2980	2901.2	0	0	0	0	0	0		1878	198351	203568	203469	205123	205123	203127	9164	9346	8658	8658	9057	8976.6	1582	1562	1230	1230	1290	1378.8
1879	410213	413263	395727	387617	425215	406407	2955	2889	2880	2803	2991	2903.6	0	0	0	0	0	0		1879	199023	204264	204130	205799	205799	203803	9200	9348	8677	8677	9102	9000.8	1583	1564	1237	1237	1294	1383
1880	411762	414847	397139	389030	426863	407928	2978	2905	2888	2811	2992	2914.8	0	0	0	0	0	0		1880	199650	204892	204804	206493	206493	204466	9216	9356	8690	8690	9122	9014.8	1593	1564	1241	1241	1300	1387.8
1881	413314	416362	398641	390529	428419	409453	3007	2919	2880	2817	3000	2924.6	0	0	0	0	0	0		1881	200307	205576	205543	207191	207191	205162	9239	9378	8751	8751	9171	9058	1596	1568	1253	1253	1312	1396.4
1882	414831	417915	400167	391972	430070	410991	3025	2908	2909	2841	2997	2936	0	0	0	0	0	0		1882	200960	206230	206202	207878	207878	205830	9278	9417	8781	8781	9192	9089.8	1609	1577	1263	1263	1318	1406
1883	416352	419484	401638	393442	431701	412523	3030	2932	2930	2843	2992	2945.4	0	0	0	0	0	0		1883	201607	206891	206899	208536	208536	206494	9314	9449	8804	8804	9226	9119.4	1612	1584	1266	1266	1317	1409
1884	417906	421022	403141	394911	433255	414047	3029	2927	2962	2870	3004	2958.4	0	0	0	0	0	0		1884	202257	207581	207528	209203	209203	207154	9323	9458	8863	8863	9256	9152.6	1619	1592	1271	1271	1321	1414.8
1885	419437	422605	404736	396394	434903	415615	3034	2922	2986	2907	3018	2973.4	0	0	0	0	0	0		1885	202938	208304	208198	209888	209888	207843	9352	9461	8884	8884	9269	9170	1625	1589	1271	1271	1324	1416
1886	421093	424157	406283	397850	436540	417185	3052	2920	2984	2918	3038	2982.4	0	0	0	0	0	0		1886	203607	208983	208851	210598	210598	208527	9383	9485	8921	8921	9313	9204.6	1626	1599	1272	1272	1330	1419.8
1887	422622	425744	407857	399351	438188	418752	3049	2930	3011	2937	3049	2995.2	0	0	0	0	0	0		1887	204307	209665	209559	211236	211236	209201	9437	9495	8950	8950	9327	9231.8	1636	1601	1273	1273	1334	1423.4
1888	424194	427337	409342	400865	439825	420313	3090	2991	3007	2952	3050	3018	0	0	0	0	0	0		1888	204969	210343	210233	211903	211903	209870	9479	9530	8998	8998	9374	9275.8	1638	1604	1280	1280	1339	1428.2
1889	425757	428954	410813	402458	441430	421882	3081	2996	2999	2985	3058	3023.8	0	0	0	0	0	0		1889	205671	211041	210932	212637	212637	210584	9504	9554	9059	9059	9392	9313.6	1640	1609	1281	1281	1343	1430.8
1890	427322	430484	412338	403978	443055	423435	3082	3026	3007	2985	3069	3033.8	0	0	0	0	0	0		1890	206387	211714	211608	213431	213431	211314	9541	9583	9085	9085	9444	9347.6	1643	1612	1282	1282	1346	1433
1891	428904	432084	413927	405465	444706	425017	3101	3043	3008	2991	3096	3047.8	0	0	0	0	0	0		1891	207117	212409	212401	214113	214113	212031	9587	9612	9129	9129	9482	9387.8	1650	1626	1295	1295	1348	1442.8
1892	430542	433720	415407	406935	446422	426605	3115	3061	3001	2984	3092	3050.6	0	0	0	0	0	0		1892	207813	213092	213036	214839	214839	212724	9626	9661	9158	9158	9508	9422.2	1657	1639	1313	1313	1348	1454
1893	432191	435332	416882	408449	448097	428190	3149	3078	3007	3002	3103	3067.8	0	0	0	0	0	0		1893	208536	213765	213769	215496	215496	213412	9656	9718	9201	9201	9512	9457.6	1664	1650	1317	1317	1353	1460.2
1894	433779	436843	418469	409945	449758	429759	3134	3097	3017	3002	3108	3071.6	0	0	0	0	0	0		1894	209249	214465	214519	216211	216211	214131	9719	9765	9246	9246	9517	9498.6	1674	1662	1322	1322	1360	1468
1895	435393	438483	419988	411498	451470	431366	3152	3102	3056	3025	3156	3098.2	0	0	0	0	0	0		1895	209955	215171	215204	216843	216843	214803	9751	9807	9276	9276	9516	9525.2	1682	1666	1321	1321	1359	1469.8
1896	436995	440136	421490	413069	453187	432975	3163	3127	3048	3041	3159	3107.6	0	0	0	0	0	0		1896	210671	215883	215869	217524	217524	215494	9767	9861	9284	9284	9547	9548.6	1689	1677	1323	1323	1370	1476.4
1897	438610	441753	423038	414581	454869	434570	3171	3119	3053	3063	3195	3120.2	0	0	0	0	0	0		1897	211326	216608	216613	218190	218190	216185	9815	9871	9323	9323	9577	9581.8	1690	1683	1327	1327	1370	1479.4
1898	440150	443411	424709	416056	456576	436180	3168	3121	3056	3065	3198	3121.6	0	0	0	0	0	0		1898	212052	217341	217327	218914	218914	216910	9867	9931	9343	9343	9599	9616.6	1695	1698	1329	1329	1371	1484.4
1899	441827	445123	426309	417632	458346	437847	3172	3134	3072	3074	3225	3135.4	0	0	0	0	0	0		1899	212724	218049	218046	219668	219668	217631	9885	9963	9384	9384	9644	9652	1698	1710	1334	1334	1376	1490.4
1900	443476	446764	427860	419177	460099	439475	3180	3158	3090	3082	3263	3154.6	0	0	0	0	0	0		1900	213441	218756	218760	220414	220414	218357	9935	9961	9455	9455	9684	9698	1702	1714	1348	1348	1376	1497.6
1901	445039	448375	429414	420744	461862	441087	3182	3140	3097	3091	3283	3158.6	0	0	0	0	0	0		1901	214163	219484	219552	221143	221143	219097	9973	9994	9495	9495	9707	9732.8	1714	1716	1352	1352	1375	1501.8
1902	446731	449973	431068	422250	463563	442717	3201	3110	3121	3101	3284	3163.4	0	0	0	0	0	0		1902	214887	220225	220271	221861	221861	219821	10020	10012	9543	9543	9738	9771.2	1723	1723	1360	1360	1376	1508.4
1903	448401	451726	432745	423912	465306	444418	3218	3125	3121	3099	3309	3174.4	0	0	0	0	0	0		1903	215597	220925	221014	222580	222580	220539	10036	10068	9556	9556	9758	9794.8	1734	1731	1361	1361	1382	1513.8
1904	450030	453345	434303	425465	467039	446036	3237	3145	3150	3104	3333	3193.8	0	0	0	0	0	0		1904	216263	221698	221732	223405	223405	221301	10062	10121	9576	9576	9825	9832	1733	1733	1362	1362	1390	1516
1905	451714	455005	435866	427075	468743	447681	3262	3165	3142	3122	3358	3209.8	0	0	0	0	0	0		1905	217022	222384	222464	224108	224108	222017	10118	10140	9610	9610	9856	9866.8	1743	1735	1366	1366	1393	1520.6
1906	453369	456720	437477	428685	470563	449363	3264	3165	3179	3145	3385	3227.6	0	0	0	0	0	0		1906	217735	223111	223094	224854	224854	222730	10154	10186	9609	9609	9893	9890.2	1755	1735	1369	1369	1402	1526
1907	455055	458416	439139	430341	472374	451065	3269	3185	3173	3176	3413	3243.2	0	0	0	0	0	0		1907	218467	223813	223819	225609	225609	223463	10194	10207	9621	9621	9926	9913.8	1765	1745	1369	1369	1409	1531.4
1908	456806	460122	440866	431942	474147	452777	3272	3198	3185	3184	3435	3254.8	0	0	0	0	0	0		1908	219216	224579	224593	226259	226259	224181	10213	10261	9684	9684	9933	9955	1768	1753	1373	1373	1408	1535
1909	458499	461874	442501	433490	475881	454449	3279	3183	3189	3180	3429	3252	0	0	0	0	0	0		1909	219916	225385	225383	227003	227003	224938	10237	10278	9715	9715	9967	9982.4	1777	1761	1380	1380	1418	1543.2
1910	460140	463611	444137	435142	477627	456131	3281	3213	3203	3199	3452	3269.6	0	0	0	0	0	0		1910	220676	226174	226145	227751	227751	225699	10288	10305	9743	9743	10006	10017	1777	1771	1381	1381	1421	1546.2
1911	461891	465296	445884	436804	479444	457864	3288	3234	3212	3225	3476	3287	0	0	0	0	0	0		1911	221385	226905	226877	228489	228489	226429	10306	10330	9813	9813	10063	10065	1786	1776	1385	1385	1430	1552.4
1912	463597	467055	447600	438427	481231	459582	3301	3243	3210	3258	3465	3295.4	0	0	0	0	0	0		1912	222063	227652	227604	229253	229253	227165	10311	10360	9852	9852	10105	10096	1794	1784	1393	1393	1432	1559.2
1913	465363	468755	449297	440003	482942	461272	3335	3245	3225	3285	3490	3316	0	0	0	0	0	0		1913	222786	228444	228353	230021	230021	227925	10351	10374	9898	9898	10122	10128.6	1803	1785	1398	1398	1437	1564.2
1914	467069	470469	450936	441670	484791	462987	3349	3258	3226	3264	3525	3324.4	0	0	0	0	0	0		1914	223460	229257	229055	230813	230813	228680	10382	10424	9916	9916	10158	10159.2	1811	1791	1403	1403	1442	1570
1915	468821	472239	452664	443320	486666	464742	3362	3291	3227	3279	3557	3343.2	0	0	0	0	0	0		1915	224234	230020	229852	231572	231572	229450	10446	10468	9957	9957	10204	10206.4	1818	1804	1405	1405	1440	1574.4
1916	470568	474020	454365	444973	488531	466491	3359	3345	3234	3274	3583	3359	0	0	0	0	0	0		1916	224913	230822	230635	232320	232320	230202	10446	10525	9996	9996	10243	10241.2	1828	1815	1414	1414	1445	1583.2
1917	472345	475802	456045	446590	490388	468234	3399	3365	3254	3275	3586	3375.8	0	0	0	0	0	0		1917	225693	231608	231436	233058	233058	230971	10490	10573	10049	10049	10261	10284.4	1832	1830	1422	1422	1445	1590.2
1918	474156	477615	457736	448203	492271	469996	3391	3377	3245	3273	3589	3375	0	0	0	0	0	0		1918	226462	232364	232286	233803	233803	231744	10533	10582	10082	10082	10314	10318.6	1839	1829	1431	1431	1452	1596.4
1919	475919	479321	459421	449852	494090	471721	3385	3380	3271	3278	3584	3379.6	0	0	0	0	0	0		1919	227242	233186	233051	234627	234627	232547	10568	10592	10121	10121	10363	10353	1845	1833	1441	1441	1460	1604
1920	477596	481076	461117	451521	495926	473447	3370	3402	3285	3278	3568	3380.6	0	0	0	0	0	0		1920	227978	233983	233786	235407	235407	233312	10624	10653	10130	10130	10391	10385.6	1850	1837	1440	1440	1462	1605.8
1921	479346	482900	462856	453204	497801	475221	3401	3441	3339	3283	3610	3414.8	0	0	0	0	0	0		1921	228737	234812	234562	236162	236162	234087	10673	10715	10166	10166	10421	10428.2	1855	1848	1445	1445	1465	1611.6
1922	481081	484641	464581	454884	499658	476969	3402	3454	3330	3311	3600	3419.4	0	0	0	0	0	0		1922	229482	235546	235331	236921	236921	234840	10697	10743	10218	10218	10459	10467	1859	1856	1455	1455	1468	1618.6
1923	482880	486454	466268	456591	501465	478732	3407	3479	3348	3328	3614	3435.2	0	0	0	0	0	0		1923	230213	236303	236098	237713	237713	235608	10744	10757	10266	10266	10496	10505.8	1869	1857	1460	1460	1475	1624.2
1924	484602	488233	467933	458297	503273	480468	3432	3497	3360	3335	3621	3449	0	0	0	0	0	0		1924	230958	237152	236874	238469	238469	236384	10803	10794	10249	10249	10550	10529	1878	1869	1467	1467	1478	1631.8
1925	486379	490058	469746	459998	505140	482264	3422	3517	3403	3336	3629	3461.4	0	0	0	0	0	0		1925	231737	238001	237718	239236	239236	237186	10836	10852	10252	10252	10568	10552	1888	1879	1467	1467	1479	1636
1926	488185	491972	471488	461702	507132	484096	3441	3537	3429	3334	3644	3477	0	0	0	0	0	0		1926	232548	238825	238488	240029	240029	237984	10889	10891	10304	10304	10583	10594.2	1895	1886	1471	1471	1489	1642.4
1927	490077	493874	473263	463344	509031	485918	3428	3557	3420	3342	3649	3479.2	0	0	0	0	0	0		1927	233314	239629	239305	240825	240825	238780	10930	10959	10367	10367	10615	10647.6	1907	1889	1476	1476	1494	1648.4
1928	491838	495685	474991	465098	510854	487693	3437	3591	3438	3386	3645	3499.4	0	0	0	0	0	0		1928	234166	240433	240137	241666	241666	239614	10988	10962	10418	10418	10676	10692.4	1918	1900	1480	1480	1506	1656.8
1929	493669	497603	476742	466837	512819	489534	3452	3608	3460	3380	3666	3513.2	0	0	0	0	0	0		1929	234954	241304	240956	242520	242520	240451	11034	11030	10439	10439	10712	10730.8	1924	1905	1485	1485	1511	1662
1930	495481	499439	478489	468608	514715	491346	3463	3616	3454	3392	3676	3520.2	0	0	0	0	0	0		1930	235739	242163	241772	243347	243347	241274	11058	11108	10480	10480	10743	10773.8	1935	1919	1493	1493	1512	1670.4
1931	497344	501297	480229	470291	516582	493149	3478	3613	3487	3385	3672	3527	0	0	0	0	0	0		1931	236476	243019	242621	244143	244143	242080	11092	11172	10533	10533	10785	10823	1939	1936	1501	1501	1518	1679
1932	499266	503151	482063	472121	518517	495024	3475	3640	3522	3412	3690	3547.8	0	0	0	0	0	0		1932	237226	243836	243460	244913	244913	242870	11100	11230	10568	10568	10794	10852	1945	1951	1510	1510	1522	1687.6
1933	501120	505009	483924	473860	520431	496869	3500	3638	3555	3404	3692	3557.8	0	0	0	0	0	0		1933	238011	244572	244296	245741	245741	243672	11130	11238	10618	10618	10850	10890.8	1954	1956	1521	1521	1526	1695.6
1934	503033	506826	485669	475650	522369	498709	3524	3670	3576	3442	3722	3586.8	0	0	0	0	0	0		1934	238808	245344	245113	246576	246576	244483	11157	11275	10658	10658	10882	10926	1955	1964	1524	1524	1528	1699
1935	504939	508801	487476	477430	524265	500582	3564	3695	3584	3442	3723	3601.6	0	0	0	0	0	0		1935	239576	246170	245941	247357	247357	245280	11178	11306	10687	10687	10913	10954.2	1958	1969	1524	1524	1528	1700.6
1936	506841	510741	489372	479193	526219	502473	3568	3726	3607	3466	3740	3621.4	0	0	0	0	0	0		1936	240400	246977	246735	248190	248190	246098	11215	11318	10724	10724	10944	10985	1966	1974	1521	1521	1527	1701.8
1937	508747	512591	491208	480990	528142	504336	3587	3739	3621	3446	3750	3628.6	0	0	0	0	0	0		1937	241238	247736	247565	249055	249055	246930	11273	11359	10766	10766	10996	11032	1969	1985	1528	1528	1532	1708.4
1938	510567	514504	492993	482785	530114	506193	3595	3747	3605	3455	3769	3634.2	0	0	0	0	0	0		1938	242030	248557	248393	249876	249876	247746	11320	11387	10807	10807	11025	11069.2	1981	1992	1539	1539	1537	1717.6
1939	512463	516441	494783	484607	532043	508067	3642	3749	3618	3491	3789	3657.8	0	0	0	0	0	0		1939	242860	249383	249306	250673	250673	248579	11339	11428	10835	10835	11057	11098.8	1986	1996	1550	1550	1548	1726
1940	514475	518263	496611	486444	534089	509976	3658	3752	3618	3497	3842	3673.4	0	0	0	0	0	0		1940	243677	250245	250155	251509	251509	249419	11390	11481	10921	10921	11098	11162.2	1999	2007	1551	1551	1551	1731.8
1941	516386	520195	498422	488246	536111	511872	3674	3788	3626	3507	3856	3690.2	0	0	0	0	0	0		1941	244535	251016	250982	252304	252304	250228	11449	11533	10968	10968	11141	11211.8	2011	2007	1558	1558	1558	1738.4
1942	518365	522073	500295	490053	538120	513781	3697	3800	3637	3538	3876	3709.6	0	0	0	0	0	0		1942	245322	251852	251807	253139	253139	251052	11454	11561	11005	11005	11139	11232.8	2017	2016	1560	1560	1561	1742.8
1943	520365	524022	502112	491927	540089	515703	3721	3769	3657	3548	3883	3715.6	0	0	0	0	0	0		1943	246127	252702	252628	254022	254022	251900	11463	11578	11073	11073	11210	11279.4	2021	2026	1567	1567	1569	1750
1944	522237	526013	504013	493746	542074	517617	3713	3791	3667	3575	3900	3729.2	0	0	0	0	0	0		1944	246916	253526	253448	254797	254797	252697	11480	11634	11124	11124	11244	11321.2	2023	2029	1566	1566	1576	1752
1945	524206	527871	505966	495605	544128	519555	3741	3801	3683	3614	3919	3751.6	0	0	0	0	0	0		1945	247726	254358	254369	255670	255670	253559	11541	11663	11155	11155	11274	11357.6	2025	2035	1567	1567	1585	1755.8
1946	526147	529905	507836	497450	546190	521506	3784	3810	3693	3627	3952	3773.2	0	0	0	0	0	0		1946	248558	255189	255252	256499	256499	254399	11596	11726	11186	11186	11292	11397.2	2028	2038	1573	1573	1592	1760.8
1947	528086	531913	509768	499360	548221	523470	3838	3838	3713	3658	4017	3812.8	0	0	0	0	0	0		1947	249365	256014	256133	257405	257405	255264	11621	11772	11243	11243	11360	11447.8	2031	2046	1588	1588	1598	1770.2
1948	530039	533899	511724	501142	550209	525403	3864	3840	3705	3648	4017	3814.8	0	0	0	0	0	0		1948	250137	256811	257040	258275	258275	256108	11642	11821	11282	11282	11381	11481.6	2035	2059	1596	1596	1608	1778.8
1949	531923	535915	513623	503041	552322	527365	3876	3851	3732	3665	3997	3824.2	0	0	0	0	0	0		1949	250962	257656	257901	259181	259181	256976	11677	11848	11310	11310	11438	11516.6	2038	2068	1597	1597	1622	1784.4
1950	533857	537944	515452	504990	554367	529322	3894	3873	3753	3680	4014	3842.8	0	0	0	0	0	0		1950	251810	258458	258780	259985	259985	257804	11681	11878	11324	11324	11494	11540.2	2041	2068	1607	1607	1628	1790.2
1951	535845	539835	517426	506866	556436	531282	3912	3869	3770	3676	4029	3851.2	0	0	0	0	0	0		1951	252640	259332	259649	260865	260865	258670	11742	11938	11335	11335	11560	11582	2045	2077	1613	1613	1633	1796.2
1952	537781	541825	519269	508736	558574	533237	3913	3898	3769	3699	4043	3864.4	0	0	0	0	0	0		1952	253455	260148	260524	261693	261693	259503	11771	11978	11388	11388	11602	11625.4	2051	2093	1622	1622	1635	1804.6
1953	539730	543844	521213	510670	560758	535243	3913	3895	3795	3701	4055	3871.8	0	0	0	0	0	0		1953	254265	261007	261393	262565	262565	260359	11785	12037	11425	11425	11618	11658	2057	2103	1623	1623	1641	1809.4
1954	541788	545989	523175	512602	562770	537265	3941	3940	3826	3722	4060	3897.8	0	0	0	0	0	0		1954	255091	261848	262224	263519	263519	261240	11829	12055	11480	11480	11656	11700	2063	2108	1627	1627	1641	1813.2
1955	543786	548099	525189	514569	564917	539312	3935	3951	3868	3716	4051	3904.2	0	0	0	0	0	0		1955	255941	262696	263126	264355	264355	262095	11876	12083	11533	11533	11710	11747	2076	2115	1636	1636	1643	1821.2
1956	545809	550120	527125	516450	567027	541306	3931	3945	3877	3737	4052	3908.4	0	0	0	0	0	0		1956	256753	263581	263949	265219	265219	262944	11868	12133	11560	11560	11759	11776	2077	2128	1644	1644	1652	1829
1957	547827	552193	529219	518342	569232	543363	3961	3981	3926	3755	4081	3940.8	0	0	0	0	0	0		1957	257603	264464	264795	266069	266069	263800	11880	12182	11618	11618	11777	11815	2085	2131	1647	1647	1659	1833.8
1958	549823	554296	531227	520300	571328	545395	3977	3984	3949	3775	4114	3959.8	0	0	0	0	0	0		1958	258487	265315	265662	266886	266886	264647	11906	12245	11674	11674	11786	11857	2086	2138	1653	1653	1677	1841.4
1959	551960	556398	533196	522186	573410	547430	3996	3991	3944	3780	4138	3969.8	0	0	0	0	0	0		1959	259231	266226	266567	267730	267730	265497	11881	12321	11703	11703	11824	11886.4	2086	2152	1661	1661	1686	1849.2
1960	553960	558495	535253	524184	575609	549500	4013	3985	3948	3804	4181	3986.2	0	0	0	0	0	0		1960	260066	267059	267412	268678	268678	266379	11896	12325	11727	11727	11863	11907.6	2101	2152	1668	1668	1694	1856.6
1961	556080	560599	537265	526168	577742	551571	4013	4005	3980	3814	4188	4000	0	0	0	0	0	0		1961	260907	267935	268261	269553	269553	267242	11927	12380	11761	11761	11891	11944	2114	2157	1670	1670	1696	1861.4
1962	558137	562675	539278	528105	579926	553624	4024	4018	4019	3823	4202	4017.2	0	0	0	0	0	0		1962	261772	268794	269168	270415	270415	268113	11995	12391	11812	11812	11947	11991.4	2124	2159	1681	1681	1706	1870.2
1963	560276	564809	541280	530106	582168	555728	4052	4061	4043	3870	4231	4051.4	0	0	0	0	0	0		1963	262574	269699	270058	271309	271309	268990	12053	12450	11843	11843	11996	12037	2127	2167	1683	1683	1706	1873.2
1964	562409	566929	543323	532084	584250	557799	4079	4087	4078	3885	4233	4072.4	0	0	0	0	0	0		1964	263462	270641	270946	272209	272209	269893	12085	12528	11900	11900	12062	12095	2131	2180	1689	1689	1710	1879.8
1965	564508	568986	545384	534050	586444	559874	4097	4109	4086	3885	4252	4085.8	0	0	0	0	0	0		1965	264351	271534	271808	273091	273091	270775	12130	12571	11936	11936	12115	12137.6	2140	2199	1702	1702	1715	1891.6
1966	566588	571082	547459	536025	588625	561956	4106	4139	4109	3914	4292	4112	0	0	0	0	0	0		1966	265209	272406	272714	273976	273976	271656	12170	12598	11974	11974	12128	12168.8	2151	2200	1714	1714	1719	1899.6
1967	568709	573263	549443	538025	590872	564062	4131	4176	4136	3940	4325	4141.6	0	0	0	0	0	0		1967	266113	273259	273604	274874	274874	272545	12229	12646	12020	12020	12194	12221.8	2159	2208	1719	1719	1729	1906.8
1968	570877	575382	551493	540135	593088	566195	4156	4190	4171	3985	4339	4168.2	0	0	0	0	0	0		1968	267009	274158	274523	275769	275769	273446	12280	12690	12111	12111	12241	12286.6	2164	2212	1731	1731	1741	1915.8
1969	572951	577492	553599	542126	595270	568288	4171	4209	4187	4015	4335	4183.4	0	0	0	0	0	0		1969	267903	275125	275417	276700	276700	274369	12268	12749	12152	12152	12310	12326.2	2170	2215	1735	1735	1750	1921
1970	575117	579626	555705	544209	597496	570431	4194	4231	4194	4020	4370	4201.8	0	0	0	0	0	0		1970	268806	276071	276338	277652	277652	275304	12308	12794	12223	12223	12401	12389.8	2180	2226	1740	1740	1754	1928
1971	577272	581885	557782	546329	599753	572604	4235	4246	4204	4047	4371	4220.6	0	0	0	0	0	0		1971	269717	276965	277218	278545	278545	276198	12357	12813	12214	12214	12459	12411.4	2189	2229	1749	1749	1763	1935.8
1972	579487	584036	559868	548390	601943	574745	4255	4264	4207	4066	4391	4236.6	0	0	0	0	0	0		1972	270554	277931	278183	279474	279474	277123	12378	12856	12271	12271	12511	12457.4	2204	2245	1752	1752	1768	1944.2
1973	581720	586231	561922	550480	604171	576905	4294	4263	4245	4109	4407	4263.6	0	0	0	0	0	0		1973	271430	278777	279043	280392	280392	278007	12407	12891	12288	12288	12573	12489.4	2207	2257	1757	1757	1779	1951.4
1974	583962	588464	563934	552492	606457	579062	4312	4294	4267	4104	4430	4281.4	0	0	0	0	0	0		1974	272284	279676	279928	281359	281359	278921	12457	12942	12311	12311	12637	12531.6	2216	2267	1765	1765	1787	1960
1975	586083	590680	566114	554544	608665	581217	4342	4304	4289	4119	4448	4300.4	0	0	0	0	0	0		1975	273214	280568	280841	282258	282258	279828	12532	12993	12348	12348	12711	12586.4	2223	2277	1774	1774	1798	1969.2
1976	588349	592992	568246	556570	610953	583422	4366	4296	4276	4162	4483	4316.6	0	0	0	0	0	0		1976	274014	281526	281775	283196	283196	280741	12530	13072	12398	12398	12707	12621	2228	2285	1777	1777	1807	1974.8
1977	590536	595172	570370	558664	613309	585610	4365	4313	4303	4152	4490	4324.6	0	0	0	0	0	0		1977	274943	282447	282752	284158	284158	281692	12590	13133	12427	12427	12756	12666.6	2235	2298	1785	1785	1811	1982.8
1978	592689	597346	572489	560756	615562	587768	4371	4295	4342	4181	4518	4341.4	0	0	0	0	0	0		1978	275845	283398	283713	285125	285125	282641	12639	13155	12460	12460	12795	12701.8	2244	2308	1799	1799	1817	1993.4
1979	594865	599642	574687	562841	617933	589994	4392	4306	4348	4207	4549	4360.4	0	0	0	0	0	0		1979	276707	284358	284603	286083	286083	283567	12672	13229	12512	12512	12839	12752.8	2254	2313	1810	1810	1830	2003.4
1980	597192	601948	576829	564978	620320	592253	4430	4312	4337	4203	4571	4370.6	0	0	0	0	0	0		1980	277598	285332	285591	287030	287030	284516	12735	13279	12605	12605	12864	12817.6	2266	2331	1813	1813	1831	2010.8
1981	599450	604188	579016	567063	622610	594465	4456	4360	4357	4240	4604	4403.4	0	0	0	0	0	0		1981	278497	286263	286493	287963	287963	285436	12772	13299	12656	12656	12912	12859	2279	2344	1817	1817	1839	2019.2
1982	601628	606425	581179	569205	624870	596661	4473	4381	4370	4272	4628	4424.8	0	0	0	0	0	0		1982	279449	287334	287486	288928	288928	286425	12834	13357	12700	12700	12961	12910.4	2289	2354	1823	1823	1854	2028.6
1983	603969	608641	583443	571288	627164	598901	4521	4398	4403	4285	4659	4453.2	0	0	0	0	0	0		1983	280356	288237	288404	289900	289900	287359	12908	13390	12793	12793	13005	12977.8	2306	2355	1833	1833	1867	2038.8
1984	606164	611021	585636	573391	629405	601123	4531	4423	4451	4294	4677	4475.2	0	0	0	0	0	0		1984	281294	289171	289344	290898	290898	288321	12945	13425	12827	12827	13056	13016	2315	2366	1846	1846	1875	2049.6
1985	608406	613273	587812	575528	631775	603359	4553	4465	4486	4343	4719	4513.2	0	0	0	0	0	0		1985	282248	290063	290316	291865	291865	289271	13007	13435	12890	12890	13070	13058.4	2326	2376	1864	1864	1876	2061.2
1986	610640	615620	589989	577665	634098	605602	4580	4517	4519	4364	4758	4547.6	0	0	0	0	0	0		1986	283191	291031	291288	292868	292868	290249	13052	13516	12968	12968	13113	13123.4	2337	2383	1858	1858	1883	2063.8
1987	612921	617985	592111	579825	636511	607871	4614	4540	4553	4380	4761	4569.6	0	0	0	0	0	0		1987	284144	292032	292274	293864	293864	291236	13067	13570	13031	13031	13140	13167.8	2346	2403	1863	1863	1897	2074.4
1988	615260	620374	594376	581998	638841	610170	4669	4564	4593	4415	4767	4601.6	0	0	0	0	0	0		1988	285101	293005	293254	294823	294823	292201	13134	13627	13112	13112	13186	13234.2	2361	2407	1868	1868	1908	2082.4
1989	617601	622759	596594	584286	641182	612484	4683	4589	4610	4454	4801	4627.4	0	0	0	0	0	0		1989	286028	294012	294181	295785	295785	293158	13166	13692	13152	13152	13237	13279.8	2378	2416	1872	1872	1915	2090.6
1990	619898	625110	598835	586541	643495	614776	4664	4624	4638	4469	4821	4643.2	0	0	0	0	0	0		1990	286995	295021	295196	296708	296708	294126	13243	13774	13214	13214	13288	13346.6	2391	2429	1887	1887	1921	2103
1991	622257	627455	601083	588739	645905	617088	4701	4642	4632	4518	4867	4672	0	0	0	0	0	0		1991	287939	295922	296114	297661	297661	295059	13280	13832	13274	13274	13343	13400.6	2409	2441	1894	1894	1933	2114.2
1992	624521	629860	603317	590944	648314	619391	4716	4691	4635	4549	4881	4694.4	0	0	0	0	0	0		1992	288927	296898	297106	298607	298607	296029	13332	13900	13336	13336	13367	13454.2	2419	2454	1893	1893	1937	2119.2
1993	626854	632303	605585	593130	650676	621710	4745	4735	4636	4551	4902	4713.8	0	0	0	0	0	0		1993	289872	297923	298128	299597	299597	297023	13359	13972	13424	13424	13412	13518.2	2423	2471	1906	1906	1941	2129.4
1994	629199	634691	607971	595332	653075	624054	4763	4751	4714	4566	4923	4743.4	0	0	0	0	0	0		1994	290865	298858	299183	300522	300522	297990	13398	14062	13499	13499	13466	13584.8	2427	2487	1923	1923	1945	2141
1995	631555	637075	610225	597624	655524	626401	4805	4748	4712	4584	4918	4753.4	0	0	0	0	0	0		1995	291846	299867	300102	301587	301587	298998	13478	14084	13502	13502	13546	13622.4	2440	2500	1927	1927	1958	2150.4
1996	633851	639420	612441	599847	658035	628719	4823	4781	4720	4599	4929	4770.4	0	0	0	0	0	0		1996	292786	300895	301097	302531	302531	299968	13525	14166	13563	13563	13556	13674.6	2452	2506	1941	1941	1961	2160.2
1997	636132	641835	614738	602066	660490	631052	4818	4807	4746	4638	4956	4793	0	0	0	0	0	0		1997	293772	301914	302106	303574	303574	300988	13566	14235	13627	13627	13617	13734.4	2461	2519	1949	1949	1961	2167.8
[truncated: 2 more rows]
