# Supplementary material for: Empirical single-cell tracking and cell-fate simulation reveal dual roles of p53 in tumor suppression
Source: eLife. 2022 Sep 20;11:e72498. doi: 10.7554/eLife.72498 (PMC9560164; doi:10.7554/eLife.72498)
Supplement: Figure 12—source data 1. — Data used in Figure 12. [file elife-72498-fig12-data1.xlsx]

## Sheet: Control+p53 RNAi (a)
Control-sim (480 cells)+p53 RNAi-sim (20 cells)
	No of cells											No of cells
Time min x10	Control-sim	Control-sim	Control-sim	Control-sim	Control-sim	Control-sim	Control-sim	Control-sim	Control-sim	Control-sim	Average	p53 RNAi-sim	p53 RNAi-sim	p53 RNAi-sim	p53 RNAi-sim	p53 RNAi-sim	p53 RNAi-sim	p53 RNAi-sim	p53 RNAi-sim	p53 RNAi-sim	p53 RNAi-sim	Average
0	480	480	480	480	480	480	480	480	480	480	480	20	20	20	20	20	20	20	20	20	20	20
1	480	480	480	480	480	480	480	480	480	480	480	20	20	20	20	20	20	20	20	20	20	20
2	480	480	480	480	480	480	480	480	480	480	480	20	20	20	20	20	20	20	20	20	20	20
3	480	480	480	480	480	480	480	480	480	480	480	20	20	20	20	20	20	20	20	20	20	20
4	480	480	480	480	480	480	480	480	480	480	480	20	20	20	20	20	20	20	20	20	20	20
5	481	483	485	484	485	489	481	486	487	482	484.3	20	20	20	20	20	20	20	20	20	20	20
6	483	483	486	484	486	491	483	490	489	485	486	20	20	20	20	20	20	20	20	20	20	20
7	483	483	486	484	486	491	483	490	489	485	486	20	20	20	20	20	20	20	20	20	20	20
8	484	485	487	484	486	492	486	490	492	486	487.2	20	20	20	20	21	21	20	20	20	20	20.2
9	489	492	494	488	492	497	492	492	502	487	492.5	20	20	20	20	22	21	20	21	20	20	20.4
10	492	494	496	488	496	497	493	493	502	490	494.1	20	20	20	20	22	21	20	21	20	20	20.4
11	495	495	497	492	496	500	494	495	503	494	496.1	21	20	20	20	22	21	20	21	20	20	20.5
12	496	495	499	493	496	502	497	496	506	496	497.6	21	20	20	20	22	21	20	21	20	20	20.5
13	496	495	499	493	496	502	497	496	506	496	497.6	21	20	20	20	22	21	20	21	20	20	20.5
14	498	496	501	495	496	502	500	498	509	498	499.3	21	20	20	20	22	21	20	22	20	20	20.6
15	498	496	501	495	496	502	500	498	509	498	499.3	21	20	20	20	22	21	20	22	20	20	20.6
16	498	496	501	495	496	502	500	498	509	498	499.3	21	20	20	20	22	21	20	22	20	20	20.6
17	498	496	501	495	496	502	500	498	509	498	499.3	21	20	20	20	22	21	20	22	20	20	20.6
18	499	496	501	495	496	502	500	498	509	498	499.4	21	21	20	21	22	21	20	22	20	20	20.8
19	498	499	501	496	497	503	500	500	512	499	500.5	21	21	20	21	22	21	20	22	20	20	20.8
20	500	500	503	497	500	506	502	504	513	503	502.8	21	21	20	21	22	21	20	22	20	20	20.8
21	503	501	505	500	503	507	504	506	514	503	504.6	21	21	20	21	22	21	20	22	20	20	20.8
22	507	501	510	505	506	511	506	508	515	504	507.3	21	21	20	21	22	22	20	22	20	20	20.9
23	511	503	511	509	510	514	507	512	516	507	510	21	22	20	21	22	22	20	22	20	20	21
24	511	503	511	509	510	514	507	512	516	507	510	21	22	20	21	22	22	20	22	21	20	21.1
25	511	503	511	509	510	514	507	512	516	507	510	21	22	20	22	22	22	20	22	21	20	21.2
26	514	507	513	516	514	514	508	516	519	509	513	21	22	20	22	22	22	20	22	21	20	21.2
27	514	507	513	516	514	514	508	516	519	509	513	21	22	20	22	22	22	20	22	21	20	21.2
28	515	511	516	519	515	517	512	518	524	511	515.8	21	22	20	22	22	22	20	22	21	20	21.2
29	515	511	516	519	515	517	512	518	524	511	515.8	21	22	20	22	22	22	20	22	21	20	21.2
30	515	511	516	519	515	517	512	518	524	511	515.8	21	22	20	22	22	22	20	22	21	20	21.2
31	515	511	516	519	515	517	512	518	524	511	515.8	21	22	20	22	22	22	20	22	21	20	21.2
32	515	511	516	519	515	517	512	518	524	511	515.8	21	22	20	22	22	22	20	22	21	20	21.2
33	516	512	517	519	516	517	514	518	526	513	516.8	21	22	20	22	22	22	20	22	21	20	21.2
34	516	512	517	519	516	517	514	518	526	513	516.8	21	22	20	22	24	22	20	22	21	20	21.4
35	516	512	517	519	516	517	514	518	526	513	516.8	21	22	20	22	24	22	20	22	21	20	21.4
36	516	512	517	519	516	517	514	518	526	513	516.8	21	22	20	22	24	22	20	22	21	20	21.4
37	516	514	519	521	518	520	517	520	526	516	518.7	21	22	20	22	24	22	20	22	21	20	21.4
38	521	519	526	528	522	523	523	521	531	526	524	22	22	20	22	24	22	20	22	21	20	21.5
39	522	519	527	530	524	524	524	521	534	526	525.1	22	22	20	22	24	24	20	22	21	20	21.7
40	523	520	528	531	525	525	526	523	534	528	526.3	22	22	20	22	24	24	20	22	21	20	21.7
41	525	521	529	532	526	527	528	524	534	528	527.4	23	22	20	22	25	24	20	22	21	20	21.9
42	525	521	530	535	526	530	530	525	534	531	528.7	23	22	20	22	25	24	20	22	21	20	21.9
43	526	521	530	535	526	530	530	525	534	531	528.8	23	22	20	22	25	24	20	22	21	20	21.9
44	529	523	530	535	527	531	531	527	534	531	529.8	23	22	20	22	25	24	20	22	21	20	21.9
45	530	524	530	537	527	533	535	527	536	532	531.1	23	22	20	22	25	24	20	22	21	20	21.9
46	534	524	530	538	531	533	535	527	537	534	532.3	23	22	20	22	25	24	20	22	21	20	21.9
47	537	527	532	544	534	535	537	530	539	536	535.1	24	22	20	22	25	24	20	22	21	20	22
48	539	531	532	546	538	537	540	535	540	538	537.6	24	22	21	23	25	24	20	22	21	20	22.2
49	541	531	533	549	541	538	539	536	542	541	539.1	25	22	21	23	25	24	20	22	21	20	22.3
50	543	535	539	551	544	543	542	537	544	541	541.9	25	22	21	23	25	24	20	22	21	20	22.3
51	548	536	543	553	546	545	544	541	546	544	544.6	25	22	21	24	25	25	20	22	21	21	22.6
52	548	536	543	553	546	545	544	541	546	544	544.6	25	22	21	24	25	25	20	22	21	21	22.6
53	551	537	543	554	547	547	545	541	547	546	545.8	25	22	21	24	25	25	20	22	21	22	22.7
54	553	541	546	558	549	554	546	544	550	549	549	25	22	21	24	25	25	21	22	21	22	22.8
55	555	541	546	560	551	554	547	545	550	549	549.8	25	22	21	24	25	26	21	22	21	22	22.9
56	557	541	548	562	557	557	548	547	551	550	551.8	25	22	21	24	25	26	21	22	21	22	22.9
57	558	541	548	562	557	557	548	547	551	550	551.9	25	22	21	24	25	26	21	22	21	22	22.9
58	560	542	550	563	557	560	548	549	552	553	553.4	25	22	21	25	25	26	21	22	21	22	23
59	560	542	550	563	557	559	548	549	552	553	553.3	25	22	21	26	25	26	21	22	21	22	23.1
60	561	544	553	566	566	561	549	554	554	556	556.4	25	22	21	26	25	26	21	23	21	22	23.2
61	563	546	555	566	568	561	551	555	554	559	557.8	25	22	21	26	25	26	21	23	21	23	23.3
62	563	546	555	566	568	561	551	555	554	559	557.8	25	22	21	26	25	26	21	23	21	23	23.3
63	565	547	555	566	572	561	552	557	555	560	559	25	22	21	26	25	26	21	23	21	23	23.3
64	567	553	556	569	576	561	555	557	556	562	561.2	25	22	21	26	25	26	21	23	21	23	23.3
65	568	553	558	569	578	562	555	557	557	563	562	26	22	21	26	25	26	21	23	21	23	23.4
66	569	554	559	570	581	563	555	561	557	564	563.3	26	22	21	26	25	28	21	24	21	23	23.7
67	570	555	560	571	582	563	557	562	558	564	564.2	26	22	21	26	25	28	21	24	21	23	23.7
68	570	559	563	573	584	565	558	562	559	571	566.4	26	22	21	27	25	28	21	24	21	24	23.9
69	573	563	569	578	587	566	562	568	561	575	570.2	26	22	21	27	25	28	21	24	21	24	23.9
70	580	568	573	581	591	570	566	575	566	580	575	26	22	21	27	25	28	22	24	21	24	24
71	580	568	573	581	591	570	566	575	566	580	575	26	22	21	27	25	28	22	24	21	24	24
72	580	568	573	581	591	570	566	575	566	580	575	26	23	21	27	25	28	22	24	21	24	24.1
73	580	568	573	581	591	570	566	575	566	580	575	26	23	21	27	25	28	22	24	21	24	24.1
74	583	571	575	584	593	571	573	576	567	583	577.6	26	23	21	27	25	28	22	24	21	24	24.1
75	585	572	578	585	598	575	574	577	572	585	580.1	27	23	21	27	25	28	22	24	21	24	24.2
76	586	573	579	587	599	577	575	578	572	585	581.1	27	23	21	27	26	28	22	24	21	24	24.3
77	586	573	579	587	599	577	575	578	572	585	581.1	27	24	21	27	26	28	22	24	21	25	24.5
78	586	574	581	590	599	579	580	581	573	586	582.9	27	24	21	27	26	28	22	24	21	25	24.5
79	586	574	581	590	599	579	580	581	573	586	582.9	27	24	21	27	26	28	22	24	21	25	24.5
80	586	576	582	591	598	580	580	583	573	588	583.7	27	24	22	28	27	28	22	24	21	25	24.8
81	586	576	582	591	598	580	580	583	573	588	583.7	27	24	22	28	27	28	22	24	21	25	24.8
82	588	576	583	591	598	581	581	585	575	589	584.7	27	24	22	29	27	28	22	25	21	25	25
83	590	578	585	594	598	582	582	589	575	591	586.4	27	25	22	29	27	28	22	25	21	25	25.1
84	590	578	585	593	598	582	582	589	575	591	586.3	27	26	22	29	27	28	22	25	21	25	25.2
85	591	579	586	594	598	586	584	590	576	591	587.5	27	26	22	29	27	28	22	25	21	25	25.2
86	592	579	588	597	598	589	584	591	577	592	588.7	27	27	22	29	27	28	22	26	22	25	25.5
87	596	579	588	597	599	589	584	592	578	593	589.5	27	27	22	29	27	28	22	26	22	25	25.5
88	596	579	588	597	599	589	584	592	577	593	589.4	27	27	22	29	27	28	22	26	22	25	25.5
89	600	582	589	600	604	589	589	594	577	593	591.7	27	27	22	29	27	28	22	26	22	25	25.5
90	604	585	590	604	608	592	592	594	578	594	594.1	27	27	22	29	27	28	22	26	22	25	25.5
91	604	585	590	604	608	591	592	594	578	594	594	27	27	22	29	28	28	22	26	22	25	25.6
92	604	585	590	604	608	591	592	594	578	594	594	27	28	22	29	28	28	22	26	22	26	25.8
93	611	590	591	607	614	594	592	598	581	597	597.5	27	28	22	29	28	29	22	26	22	26	25.9
94	611	590	591	606	614	594	592	598	581	597	597.4	27	28	22	29	28	29	22	26	22	26	25.9
95	611	593	595	611	618	597	595	602	581	600	600.3	27	28	22	29	28	29	22	26	22	26	25.9
96	615	597	596	611	620	598	595	603	583	602	602	27	28	22	29	28	29	22	26	22	26	25.9
97	616	600	597	614	620	599	597	604	589	605	604.1	27	29	22	29	28	29	22	26	22	26	26
98	618	603	600	617	622	600	600	607	591	607	606.5	27	29	22	29	28	29	22	26	22	26	26
99	620	606	601	617	623	600	602	609	592	608	607.8	27	29	22	29	28	29	23	26	22	26	26.1
100	622	613	602	620	625	601	604	611	595	611	610.4	28	29	22	29	29	29	24	26	22	26	26.4
101	622	614	602	620	626	602	604	611	596	611	610.8	28	29	22	29	29	29	24	26	22	26	26.4
102	622	614	602	620	626	602	604	611	596	611	610.8	28	29	22	29	29	29	25	26	22	26	26.5
103	623	616	607	620	626	603	608	614	600	614	613.1	28	29	22	29	29	29	25	26	22	26	26.5
104	623	616	607	620	626	603	608	614	600	614	613.1	28	29	22	29	29	29	25	26	22	26	26.5
105	624	616	610	623	629	603	610	614	604	618	615.1	28	29	22	29	29	29	25	26	22	26	26.5
106	625	617	612	627	633	607	613	620	609	621	618.4	28	30	22	29	27	29	25	26	22	26	26.4
107	625	617	612	627	633	607	613	620	609	621	618.4	28	30	23	29	27	29	25	26	22	27	26.6
108	629	618	617	631	634	609	614	623	614	623	621.2	29	30	23	29	27	29	25	26	22	27	26.7
109	631	618	618	632	635	614	617	626	615	625	623.1	29	30	23	29	27	29	25	26	22	27	26.7
110	631	620	619	634	636	614	619	626	616	626	624.1	29	30	23	29	28	30	25	26	22	27	26.9
111	631	620	619	634	636	614	619	626	616	626	624.1	29	30	23	29	28	30	25	26	22	27	26.9
112	631	620	619	634	636	614	619	626	616	626	624.1	29	30	23	29	28	30	25	26	22	27	26.9
113	631	620	618	634	636	614	619	626	616	626	624	29	30	23	29	28	30	25	26	22	27	26.9
114	631	620	618	634	635	614	619	626	616	626	623.9	29	30	23	29	28	30	25	26	22	27	26.9
115	635	624	622	639	639	617	619	628	619	627	626.9	29	30	23	29	28	31	25	26	22	27	27
116	635	624	622	639	639	617	619	628	619	627	626.9	29	30	23	31	29	31	25	26	22	27	27.3
117	636	624	623	640	639	621	619	629	622	632	628.5	29	30	23	31	29	31	25	26	22	27	27.3
118	635	624	623	640	639	621	619	629	622	632	628.4	29	31	23	31	29	32	24	27	22	27	27.5
119	643	628	629	645	643	629	628	633	628	634	634	29	31	24	31	29	32	24	28	22	27	27.7
120	648	631	632	648	647	631	627	634	631	636	636.5	29	31	24	31	29	32	24	28	22	27	27.7
121	653	641	642	653	647	644	632	648	635	642	643.7	30	31	24	31	29	32	24	28	22	27	27.8
122	653	641	643	653	648	646	633	648	636	643	644.4	30	31	24	31	29	32	24	27	22	27	27.7
123	653	642	644	653	650	648	634	650	638	646	645.8	30	32	24	31	30	33	24	27	22	27	28
124	656	644	646	654	651	648	637	650	640	647	647.3	30	32	24	31	30	33	24	27	22	27	28
125	660	645	646	654	652	651	639	651	643	651	649.2	30	33	24	31	30	33	25	27	23	27	28.3
126	661	647	647	655	655	654	643	650	644	654	651	30	33	24	31	30	33	25	27	23	27	28.3
127	662	649	651	655	655	654	648	651	645	655	652.5	30	33	24	31	30	33	25	27	23	27	28.3
128	664	653	655	655	659	655	652	657	649	659	655.8	30	33	24	31	30	33	25	27	25	27	28.5
129	666	655	658	658	660	657	656	657	650	661	657.8	30	33	24	31	30	32	25	27	25	28	28.5
130	667	658	660	659	664	659	661	660	651	663	660.2	30	33	25	31	30	32	26	27	25	28	28.7
131	667	662	664	662	666	662	665	664	653	664	662.9	30	33	25	31	30	32	26	27	25	28	28.7
132	672	668	670	668	672	668	670	666	657	668	667.9	30	33	25	31	30	32	26	28	25	28	28.8
133	676	674	676	671	675	672	671	668	661	670	671.4	31	33	25	31	30	32	26	28	25	28	28.9
134	679	675	678	675	680	674	673	670	662	673	673.9	31	34	25	31	31	32	26	28	25	28	29.1
135	682	679	679	680	686	678	678	674	667	679	678.2	31	34	25	31	31	32	26	28	25	28	29.1
136	685	682	679	683	689	678	681	677	668	683	680.5	31	34	25	31	31	32	26	28	25	28	29.1
137	687	687	681	684	693	683	683	678	671	686	683.3	31	34	26	31	31	32	26	28	25	29	29.3
138	687	687	681	684	693	683	683	678	671	686	683.3	31	34	26	31	31	32	26	29	25	29	29.4
139	689	688	683	684	694	686	684	680	672	688	684.8	31	34	26	31	31	32	26	29	25	29	29.4
140	689	693	686	687	696	691	688	681	677	689	687.7	31	34	26	31	31	32	26	29	25	29	29.4
141	691	693	687	688	696	691	689	682	677	689	688.3	31	34	26	31	31	32	26	29	25	29	29.4
142	694	695	689	691	696	690	693	685	680	695	690.8	31	34	27	31	31	32	26	29	25	29	29.5
143	696	697	695	692	697	693	694	688	681	702	693.5	32	34	27	31	31	32	26	29	25	29	29.6
144	697	698	697	693	701	695	699	690	685	706	696.1	33	34	27	31	31	32	27	29	25	29	29.8
145	697	697	697	694	702	695	700	691	685	706	696.4	33	34	27	32	31	32	27	29	25	29	29.9
146	699	700	697	694	704	696	701	692	686	706	697.5	33	33	27	32	31	32	27	29	25	30	29.9
147	699	700	697	694	705	696	701	692	687	707	697.8	33	33	27	32	31	32	27	29	25	30	29.9
148	700	702	697	694	709	702	703	694	689	711	700.1	33	33	27	32	31	32	27	30	25	30	30
149	700	703	698	696	711	705	705	695	690	713	701.6	34	33	27	33	31	32	28	30	25	30	30.3
150	700	703	698	696	711	705	705	696	690	713	701.7	34	33	27	33	31	32	28	30	25	30	30.3
151	701	703	701	697	711	706	707	698	693	714	703.1	34	33	28	33	31	32	29	30	25	30	30.5
152	703	703	704	698	713	709	710	698	695	716	704.9	34	33	28	33	31	32	29	30	25	30	30.5
153	705	706	706	699	716	709	712	698	697	719	706.7	34	33	29	33	31	32	29	30	25	30	30.6
154	708	709	712	707	720	712	722	703	701	726	712	34	33	29	33	32	32	30	30	25	32	31
155	709	712	713	709	723	713	722	704	701	727	713.3	34	33	29	34	32	32	30	30	25	32	31.1
156	715	717	715	718	724	716	732	716	709	735	719.7	35	33	29	34	32	33	30	31	25	32	31.4
157	721	721	716	723	727	720	737	721	716	741	724.3	35	33	29	34	32	33	30	31	25	32	31.4
158	721	721	716	724	728	720	737	721	717	742	724.7	35	33	29	34	32	33	30	31	25	32	31.4
159	723	722	721	727	731	725	739	725	719	745	727.7	36	33	29	34	32	33	30	31	25	32	31.5
160	724	725	723	728	734	729	741	731	720	746	730.1	36	33	29	34	32	33	30	31	25	32	31.5
161	725	725	724	729	734	730	748	732	725	751	732.3	36	33	29	34	32	33	30	31	25	32	31.5
162	731	733	731	738	738	736	751	742	736	756	739.2	36	33	29	34	32	34	30	31	25	32	31.6
163	731	734	735	738	739	737	753	744	737	758	740.6	36	33	29	34	32	34	30	31	25	32	31.6
164	731	733	735	739	740	738	753	744	737	759	740.9	36	33	29	34	32	34	30	31	25	32	31.6
165	737	735	736	743	744	743	755	746	741	763	744.3	36	33	29	34	32	34	30	31	25	32	31.6
166	738	735	737	743	744	743	756	746	741	763	744.6	36	33	29	34	32	34	30	32	25	32	31.7
167	740	739	738	743	746	744	757	747	745	763	746.2	37	33	29	34	32	34	30	32	25	32	31.8
168	743	741	744	751	753	751	758	755	752	769	751.7	37	33	29	34	32	34	30	33	25	32	31.9
169	744	744	744	755	754	753	760	757	754	772	753.7	37	33	31	34	32	34	30	33	25	33	32.2
170	746	745	744	755	754	754	760	758	755	773	754.4	37	33	31	34	32	34	31	33	27	33	32.5
171	748	746	745	757	754	753	762	758	755	773	755.1	37	33	31	34	32	34	31	33	27	33	32.5
172	751	754	756	761	763	756	767	764	764	785	762.1	37	33	31	34	32	35	31	33	27	33	32.6
173	751	754	757	762	764	758	769	764	765	785	762.9	37	33	31	34	32	35	31	33	27	33	32.6
174	752	755	760	762	764	761	769	764	766	786	763.9	37	32	31	34	32	35	31	33	28	33	32.6
175	752	755	761	763	767	762	770	764	766	788	764.8	37	32	31	34	33	35	31	33	28	33	32.7
176	754	756	761	764	768	765	770	763	766	789	765.6	37	32	33	34	33	35	31	33	28	33	32.9
177	757	758	762	765	770	767	774	768	767	790	767.8	37	32	34	34	33	35	31	33	28	33	33
178	760	761	764	767	775	769	778	773	771	797	771.5	37	32	34	34	34	36	32	34	28	33	33.4
179	762	764	769	770	775	774	780	778	775	802	774.9	37	32	34	34	34	36	32	34	28	34	33.5
180	764	767	769	772	777	775	782	782	777	805	777	37	32	34	36	34	36	32	34	28	35	33.8
181	768	768	771	773	780	777	786	786	779	808	779.6	37	32	34	36	34	36	32	34	29	34	33.8
182	769	770	773	780	782	779	786	787	780	811	781.7	37	32	34	37	34	36	32	35	29	34	34
183	776	776	781	793	791	785	795	792	789	815	789.3	37	32	34	38	34	36	32	35	30	34	34.2
184	782	777	781	794	794	786	795	794	792	817	791.2	37	32	34	38	34	36	32	35	30	34	34.2
185	782	779	782	795	796	788	796	795	797	819	792.9	37	32	34	38	34	37	33	35	30	34	34.4
186	784	782	786	796	799	791	803	798	801	821	796.1	37	32	34	38	34	37	33	35	30	34	34.4
187	789	787	794	801	805	795	808	803	804	828	801.4	38	32	34	38	34	37	33	35	30	34	34.5
188	790	787	796	801	807	801	809	805	804	831	803.1	38	32	34	38	34	37	33	35	30	34	34.5
189	791	788	797	802	809	802	810	808	807	834	804.8	38	32	34	38	34	37	33	35	30	34	34.5
190	793	793	797	803	813	806	815	813	811	838	808.2	38	32	34	39	34	37	33	35	30	34	34.6
191	794	796	797	807	818	808	815	815	815	840	810.5	38	33	34	39	34	37	33	36	30	34	34.8
192	795	798	798	808	818	808	817	816	815	841	811.4	38	33	34	39	34	37	33	36	30	34	34.8
193	797	800	799	812	820	809	819	818	815	843	813.2	38	33	34	39	34	38	33	36	30	34	34.9
194	799	800	799	815	823	809	820	818	815	842	814	38	33	34	39	33	38	33	36	30	34	34.8
195	800	804	804	818	824	812	827	822	818	847	817.6	38	33	34	39	33	38	33	36	31	33	34.8
196	804	809	809	822	825	815	827	826	823	848	820.8	38	33	34	39	33	38	33	36	31	33	34.8
197	807	815	813	826	830	821	831	832	824	849	824.8	38	33	34	39	33	38	33	36	31	33	34.8
198	809	815	813	828	832	823	831	835	825	850	826.1	38	33	34	39	33	38	33	36	31	33	34.8
199	814	820	816	830	833	827	835	837	826	856	829.4	38	33	34	39	33	38	33	36	31	33	34.8
200	816	823	815	830	838	829	837	838	826	859	831.1	38	33	34	39	33	38	33	36	31	33	34.8
201	820	826	817	831	839	830	837	841	829	861	833.1	39	33	34	39	33	38	33	36	31	33	34.9
202	825	828	818	834	841	834	840	842	833	864	835.9	39	33	34	39	33	38	33	37	31	33	35
203	828	829	819	836	843	836	842	843	835	866	837.7	39	33	34	39	34	38	33	37	32	33	35.2
204	832	832	819	842	846	839	846	844	837	866	840.3	39	33	34	39	34	38	33	37	32	33	35.2
205	834	834	822	843	846	840	848	846	838	868	841.9	41	33	34	39	34	39	33	37	32	33	35.5
206	838	834	824	849	848	841	851	848	843	873	844.9	41	33	34	40	34	39	34	38	32	33	35.8
207	842	837	825	852	850	842	855	850	847	875	847.5	41	33	34	41	34	39	34	38	32	33	35.9
208	846	838	827	857	853	844	855	851	847	876	849.4	41	33	34	41	34	39	34	38	32	33	35.9
209	847	841	831	862	855	847	858	852	848	877	851.8	42	33	34	41	34	39	34	38	32	33	36
210	851	843	832	868	857	850	858	856	850	879	854.4	42	33	34	41	34	39	34	38	32	33	36
211	852	844	834	870	857	852	862	856	853	883	856.3	42	33	34	43	34	39	34	38	33	33	36.3
212	854	847	838	872	858	854	867	858	854	885	858.7	42	33	34	43	34	39	34	38	34	33	36.4
213	856	849	838	878	862	857	867	860	856	888	861.1	42	33	35	43	34	39	34	38	34	33	36.5
214	859	851	840	879	863	859	867	861	858	890	862.7	42	33	35	43	34	39	34	38	34	33	36.5
215	860	851	842	881	868	858	869	863	861	894	864.7	42	33	35	43	34	39	34	38	34	33	36.5
216	862	852	844	882	871	858	869	867	865	894	866.4	42	33	35	43	34	40	34	38	34	33	36.6
217	865	855	848	884	873	862	871	867	869	897	869.1	42	33	36	43	34	40	34	38	34	33	36.7
218	866	856	854	889	876	865	874	870	872	900	872.2	42	34	36	43	34	40	34	38	34	33	36.8
219	868	859	861	893	880	867	875	872	876	903	875.4	43	34	36	43	34	40	35	38	34	33	37
220	872	861	865	895	883	870	878	872	876	907	877.9	43	34	36	43	34	41	35	38	34	33	37.1
221	872	862	869	898	883	872	878	875	877	910	879.6	44	34	36	43	34	41	35	38	34	33	37.2
222	874	864	870	899	884	876	881	878	878	913	881.7	44	34	36	43	34	41	35	38	34	33	37.2
223	877	868	875	900	888	877	883	880	884	919	885.1	44	33	36	43	35	41	35	38	34	33	37.2
224	880	869	881	900	891	882	886	882	888	922	888.1	44	33	36	43	36	41	35	38	34	33	37.3
225	883	874	883	901	896	886	889	887	891	925	891.5	44	33	36	43	36	41	35	38	34	33	37.3
226	884	876	888	905	897	887	889	888	891	930	893.5	44	33	36	43	36	41	35	38	34	33	37.3
227	885	881	890	907	903	892	889	893	896	933	896.9	44	33	36	43	36	41	35	38	34	33	37.3
228	891	884	892	913	908	896	893	897	899	938	901.1	44	34	37	43	36	41	35	38	34	33	37.5
229	895	888	902	919	910	899	893	902	904	942	905.4	44	34	37	44	36	41	35	38	34	33	37.6
230	897	889	907	920	913	901	898	905	906	945	908.1	44	34	37	44	36	41	35	38	34	33	37.6
231	901	892	909	921	918	903	901	908	910	947	911	44	34	37	44	36	41	35	38	34	33	37.6
232	904	892	910	920	919	906	903	909	911	949	912.3	44	34	37	44	36	41	35	38	34	33	37.6
233	906	893	915	922	921	908	906	910	912	949	914.2	44	34	37	45	36	41	35	39	34	34	37.9
234	912	896	921	928	924	911	906	915	914	952	917.9	44	34	37	45	36	41	35	39	34	34	37.9
235	916	899	921	930	926	915	906	916	914	956	919.9	44	35	37	45	36	41	35	40	34	35	38.2
236	920	903	923	934	930	922	912	920	916	956	923.6	44	35	37	45	36	41	35	39	34	35	38.1
237	927	906	925	937	933	926	913	923	917	958	926.5	44	35	37	45	36	42	35	39	34	35	38.2
238	928	910	930	939	934	927	913	928	919	961	928.9	44	35	37	46	36	42	36	39	34	36	38.5
239	936	911	930	942	938	928	920	931	926	965	932.7	44	35	36	46	36	44	36	40	34	36	38.7
240	937	911	932	944	941	929	920	935	928	966	934.3	44	35	36	46	36	44	36	40	34	37	38.8
241	939	911	934	944	942	929	922	937	929	968	935.5	44	35	36	46	36	44	36	40	34	37	38.8
242	941	913	935	948	946	933	924	941	931	973	938.5	44	35	36	46	36	44	36	40	34	37	38.8
243	940	914	936	952	948	934	928	945	934	977	940.8	44	35	35	46	37	45	36	40	34	37	38.9
244	944	918	941	960	950	938	933	955	940	985	946.4	44	35	35	48	37	45	36	40	34	37	39.1
245	949	921	944	963	953	938	934	958	941	986	948.7	44	35	35	49	37	45	36	40	34	37	39.2
246	952	924	944	965	956	940	936	964	942	988	951.1	44	35	35	49	37	45	36	40	34	37	39.2
247	954	925	948	970	960	945	939	966	945	993	954.5	44	35	35	50	37	46	36	40	34	37	39.4
248	957	928	950	972	964	947	939	967	947	998	956.9	44	35	35	50	37	46	36	41	34	37	39.5
249	957	930	954	973	968	949	941	969	947	999	958.7	44	35	35	50	37	46	36	41	34	37	39.5
250	958	935	957	974	971	952	946	971	955	1000	961.9	46	35	35	50	37	46	36	41	34	38	39.8
251	963	941	964	976	980	954	951	975	957	1003	966.4	46	35	35	53	37	47	36	41	34	39	40.3
252	965	944	964	978	983	959	952	977	959	1004	968.5	46	35	35	54	37	47	36	41	34	40	40.5
253	973	945	966	981	987	962	952	985	964	1010	972.5	46	35	35	54	37	47	36	41	34	40	40.5
254	977	949	972	986	989	964	955	988	968	1013	976.1	47	35	35	54	37	47	36	42	34	40	40.7
255	981	954	975	989	990	969	959	993	970	1018	979.8	47	36	35	54	37	47	36	42	34	40	40.8
256	985	956	977	993	991	970	961	996	971	1020	982	48	36	35	54	37	47	36	42	34	40	40.9
257	993	958	980	997	995	971	964	1000	979	1024	986.1	48	36	36	54	37	48	36	42	34	40	41.1
258	1000	958	982	1001	996	973	967	1000	983	1027	988.7	48	36	36	54	37	48	36	43	34	40	41.2
259	1006	961	985	1004	1002	973	970	1002	983	1029	991.5	48	37	36	54	37	49	36	43	34	40	41.4
260	1014	963	993	1009	1007	980	976	1007	986	1034	996.9	48	37	36	54	37	49	36	43	34	40	41.4
261	1019	965	996	1013	1011	982	981	1010	989	1039	1000.5	48	37	35	54	38	49	36	43	34	40	41.4
262	1022	966	998	1013	1013	984	984	1014	990	1042	1002.6	48	37	35	55	38	49	36	44	34	40	41.6
263	1024	971	1004	1017	1014	986	987	1018	993	1042	1005.6	48	37	35	55	38	49	36	45	36	40	41.9
264	1025	978	1007	1019	1018	988	989	1020	996	1044	1008.4	48	37	35	55	38	49	36	45	36	40	41.9
265	1025	985	1012	1025	1020	991	991	1025	1000	1048	1012.2	48	37	35	55	39	50	36	45	36	40	42.1
266	1030	985	1013	1030	1025	992	992	1028	1003	1053	1015.1	48	37	35	55	39	50	37	45	36	41	42.3
267	1032	989	1014	1034	1030	993	997	1029	1005	1058	1018.1	48	37	35	55	39	50	38	45	36	41	42.4
268	1034	990	1016	1038	1032	994	999	1030	1009	1061	1020.3	48	37	35	55	39	50	39	45	36	41	42.5
269	1036	991	1024	1042	1037	999	1003	1035	1015	1063	1024.5	48	38	35	55	40	50	39	45	36	41	42.7
270	1039	993	1027	1046	1041	1000	1004	1038	1016	1064	1026.8	48	40	35	55	41	51	39	45	36	41	43.1
271	1044	999	1031	1052	1043	1007	1010	1041	1019	1070	1031.6	48	40	35	55	41	51	39	45	36	42	43.2
272	1050	1003	1034	1060	1047	1010	1014	1046	1022	1071	1035.7	48	41	35	55	41	51	40	45	36	42	43.4
273	1053	1006	1036	1061	1049	1012	1015	1047	1026	1076	1038.1	48	41	35	54	42	52	40	45	36	42	43.5
274	1056	1008	1040	1064	1050	1019	1017	1051	1029	1077	1041.1	48	41	35	55	42	52	40	45	36	42	43.6
275	1062	1010	1043	1068	1055	1021	1019	1059	1030	1079	1044.6	48	41	35	55	43	52	40	45	37	42	43.8
276	1064	1010	1044	1069	1059	1025	1023	1058	1033	1084	1046.9	48	44	35	55	43	52	40	45	37	42	44.1
277	1066	1015	1051	1073	1062	1026	1026	1059	1035	1088	1050.1	48	44	35	55	43	52	40	45	37	42	44.1
278	1068	1020	1053	1078	1066	1027	1031	1065	1040	1093	1054.1	48	45	36	54	43	52	40	45	37	43	44.3
279	1073	1024	1059	1081	1067	1031	1033	1074	1045	1095	1058.2	48	45	36	54	43	52	40	45	37	44	44.4
280	1075	1027	1065	1085	1074	1035	1038	1076	1046	1098	1061.9	48	45	36	54	44	52	40	45	37	44	44.5
281	1080	1031	1072	1090	1083	1036	1042	1081	1050	1097	1066.2	48	45	36	54	44	52	40	46	37	44	44.6
282	1088	1033	1074	1095	1086	1039	1046	1084	1056	1103	1070.4	48	46	36	54	45	52	41	46	38	44	45
283	1094	1036	1078	1098	1088	1043	1050	1086	1058	1106	1073.7	48	46	37	55	45	52	41	46	38	44	45.2
284	1096	1038	1081	1103	1093	1047	1056	1090	1062	1111	1077.7	48	46	37	56	45	52	42	46	38	44	45.4
285	1098	1040	1086	1104	1094	1050	1059	1092	1066	1115	1080.4	50	46	37	56	45	52	42	46	38	44	45.6
286	1102	1042	1090	1109	1096	1053	1061	1095	1071	1118	1083.7	50	46	37	57	45	52	42	46	38	44	45.7
287	1103	1044	1092	1111	1098	1056	1065	1097	1074	1121	1086.1	51	46	37	57	45	52	43	46	38	44	45.9
288	1106	1047	1092	1113	1101	1062	1070	1101	1076	1127	1089.5	52	47	37	57	45	52	43	47	38	44	46.2
289	1113	1052	1098	1119	1103	1068	1075	1104	1079	1132	1094.3	52	47	37	57	45	53	43	47	38	44	46.3
290	1116	1056	1103	1123	1107	1070	1081	1110	1082	1135	1098.3	52	47	37	56	45	54	45	47	40	45	46.8
291	1122	1061	1105	1125	1114	1078	1084	1114	1084	1139	1102.6	52	47	37	56	45	55	45	48	40	45	47
292	1123	1067	1109	1127	1119	1078	1089	1117	1087	1141	1105.7	52	47	36	56	45	55	45	49	40	45	47
293	1125	1074	1112	1129	1125	1084	1094	1118	1091	1144	1109.6	52	49	36	56	45	55	45	49	40	45	47.2
294	1132	1076	1115	1134	1130	1086	1096	1120	1094	1149	1113.2	53	48	36	56	45	56	45	50	40	45	47.4
295	1137	1081	1121	1139	1132	1090	1105	1124	1103	1153	1118.5	53	48	38	56	45	56	45	51	40	46	47.8
296	1141	1083	1125	1144	1134	1092	1108	1128	1105	1157	1121.7	53	48	38	56	46	56	45	51	42	47	48.2
297	1144	1085	1129	1148	1141	1095	1112	1131	1110	1162	1125.7	54	48	39	56	47	57	45	51	42	47	48.6
298	1149	1094	1132	1150	1144	1098	1121	1132	1113	1165	1129.8	54	48	39	56	48	57	45	51	42	47	48.7
299	1149	1097	1134	1152	1150	1104	1124	1136	1121	1171	1133.8	54	48	41	56	49	57	46	51	42	47	49.1
300	1157	1101	1140	1157	1151	1108	1130	1140	1124	1179	1138.7	54	47	41	57	49	57	46	51	42	47	49.1
301	1158	1103	1147	1163	1155	1114	1136	1141	1130	1184	1143.1	56	46	41	57	49	58	46	52	42	48	49.5
302	1164	1103	1152	1168	1158	1121	1137	1144	1132	1187	1146.6	56	46	42	57	49	58	46	52	42	48	49.6
303	1168	1109	1152	1171	1162	1125	1141	1146	1135	1189	1149.8	56	47	42	57	50	58	46	52	42	48	49.8
304	1173	1114	1155	1175	1170	1129	1147	1151	1141	1193	1154.8	57	47	44	57	50	59	46	52	42	48	50.2
305	1179	1115	1157	1179	1171	1134	1153	1156	1146	1194	1158.4	57	47	44	57	50	59	46	52	42	48	50.2
306	1183	1115	1159	1182	1174	1141	1156	1159	1151	1198	1161.8	57	46	44	57	50	59	48	52	42	48	50.3
307	1187	1121	1162	1185	1177	1148	1160	1166	1155	1202	1166.3	57	46	44	58	51	59	48	52	42	48	50.5
308	1188	1127	1174	1187	1182	1155	1165	1169	1159	1207	1171.3	57	46	44	58	52	59	48	52	43	48	50.7
309	1189	1135	1177	1191	1183	1159	1166	1172	1163	1211	1174.6	57	48	44	58	52	59	49	52	43	48	51
310	1192	1142	1186	1192	1186	1165	1177	1176	1170	1213	1179.9	58	48	45	58	53	60	49	52	43	48	51.4
311	1198	1147	1189	1196	1193	1169	1184	1183	1173	1219	1185.1	58	48	45	58	53	60	49	52	43	48	51.4
312	1203	1148	1193	1201	1201	1173	1187	1187	1179	1223	1189.5	59	48	45	59	53	60	49	52	43	48	51.6
313	1205	1150	1197	1201	1202	1177	1192	1189	1184	1227	1192.4	59	48	44	60	53	60	49	52	43	48	51.6
314	1209	1156	1202	1203	1203	1177	1191	1191	1187	1232	1195.1	60	48	44	60	53	61	49	52	43	48	51.8
315	1212	1161	1206	1205	1206	1180	1196	1193	1191	1236	1198.6	60	48	44	60	53	61	50	52	43	48	51.9
316	1214	1165	1212	1210	1208	1189	1201	1198	1194	1241	1203.2	60	48	44	60	53	61	51	52	43	48	52
317	1215	1167	1218	1213	1212	1198	1204	1201	1200	1245	1207.3	60	48	44	60	53	61	52	52	43	48	52.1
318	1216	1173	1222	1217	1216	1201	1209	1207	1203	1247	1211.1	60	48	44	59	53	62	52	52	44	48	52.2
319	1217	1179	1226	1226	1220	1203	1210	1211	1207	1251	1215	60	49	44	59	53	62	52	53	44	48	52.4
320	1223	1182	1230	1230	1229	1209	1212	1217	1210	1253	1219.5	60	49	45	59	53	62	52	53	44	48	52.5
321	1231	1187	1235	1236	1238	1214	1216	1223	1217	1260	1225.7	60	49	45	59	54	62	52	53	44	48	52.6
322	1232	1194	1238	1243	1243	1216	1221	1230	1222	1262	1230.1	60	49	45	59	55	62	52	53	44	49	52.8
323	1239	1196	1245	1248	1248	1222	1223	1235	1228	1265	1234.9	61	49	45	59	55	62	52	53	44	49	52.9
324	1247	1205	1253	1251	1255	1223	1226	1240	1235	1270	1240.5	61	49	45	59	55	62	52	53	43	49	52.8
325	1250	1209	1261	1257	1261	1225	1229	1241	1239	1280	1245.2	62	49	45	60	55	62	52	53	43	50	53.1
326	1258	1218	1266	1262	1268	1234	1237	1245	1245	1286	1251.9	63	49	45	60	56	63	52	54	43	50	53.5
327	1260	1222	1268	1268	1276	1238	1247	1248	1251	1294	1257.2	63	49	45	60	56	63	52	55	43	50	53.6
328	1265	1228	1274	1270	1282	1246	1254	1251	1255	1301	1262.6	63	49	44	60	56	63	52	55	43	50	53.5
329	1267	1234	1279	1277	1286	1251	1257	1261	1256	1304	1267.2	63	49	44	60	56	63	52	55	43	50	53.5
330	1272	1241	1285	1281	1288	1257	1261	1264	1258	1312	1271.9	64	49	44	60	56	64	52	55	43	50	53.7
331	1276	1247	1289	1287	1291	1258	1266	1269	1262	1316	1276.1	65	49	44	60	56	65	52	56	43	49	53.9
332	1281	1250	1295	1292	1296	1264	1278	1272	1267	1326	1282.1	65	49	44	60	56	66	52	56	43	49	54
333	1285	1255	1299	1296	1301	1268	1284	1280	1270	1329	1286.7	65	49	44	60	57	66	52	56	43	49	54.1
334	1290	1260	1304	1302	1302	1275	1293	1288	1273	1335	1292.2	65	49	45	60	57	67	52	56	43	50	54.4
335	1298	1264	1307	1305	1308	1279	1298	1297	1278	1341	1297.5	65	49	45	60	57	67	52	57	43	50	54.5
336	1300	1268	1309	1307	1314	1282	1303	1301	1282	1344	1301	65	49	47	60	57	67	52	57	43	50	54.7
337	1306	1276	1314	1310	1322	1287	1311	1303	1283	1353	1306.5	65	49	47	60	57	66	52	58	43	50	54.7
338	1310	1285	1318	1313	1325	1291	1317	1310	1287	1360	1311.6	65	49	47	61	57	66	52	58	43	50	54.8
339	1312	1287	1326	1314	1326	1294	1324	1316	1290	1367	1315.6	65	49	47	62	57	66	53	59	44	51	55.3
340	1322	1289	1330	1317	1330	1295	1330	1324	1297	1371	1320.5	65	49	47	63	57	66	53	59	46	51	55.6
341	1328	1298	1334	1325	1333	1300	1336	1328	1300	1376	1325.8	65	49	47	63	57	66	53	59	46	51	55.6
342	1331	1300	1340	1331	1337	1305	1339	1334	1302	1382	1330.1	65	49	48	63	57	67	53	59	46	52	55.9
343	1333	1301	1340	1338	1337	1309	1347	1340	1310	1393	1334.8	65	49	48	63	57	67	53	59	47	53	56.1
344	1339	1303	1350	1343	1341	1318	1356	1342	1317	1400	1340.9	65	49	48	63	57	67	54	60	47	53	56.3
345	1345	1311	1353	1347	1344	1323	1361	1345	1320	1405	1345.4	65	49	48	64	57	67	54	61	47	53	56.5
346	1354	1317	1359	1353	1347	1330	1363	1350	1327	1412	1351.2	65	49	48	66	57	67	54	62	48	52	56.8
347	1359	1324	1365	1354	1356	1334	1371	1357	1333	1419	1357.2	65	49	49	66	57	67	54	62	48	52	56.9
348	1364	1326	1373	1358	1364	1340	1377	1361	1337	1423	1362.3	65	49	49	66	57	67	54	64	48	54	57.3
349	1367	1329	1377	1361	1367	1349	1382	1365	1341	1428	1366.6	65	50	49	66	57	67	54	64	48	54	57.4
350	1372	1333	1382	1364	1372	1351	1387	1372	1348	1440	1372.1	65	50	49	66	58	67	54	65	48	54	57.6
351	1374	1336	1385	1370	1379	1355	1387	1378	1350	1451	1376.5	66	50	49	66	59	67	54	65	48	54	57.8
352	1379	1340	1386	1378	1385	1360	1390	1381	1350	1454	1380.3	66	50	49	66	59	67	54	65	48	55	57.9
353	1382	1345	1391	1381	1390	1368	1394	1387	1354	1457	1384.9	66	50	49	68	59	69	54	65	49	55	58.4
354	1387	1350	1398	1387	1394	1378	1403	1390	1362	1464	1391.3	67	50	49	68	59	70	54	65	49	55	58.6
355	1388	1357	1405	1394	1395	1379	1406	1392	1365	1468	1394.9	68	50	50	68	59	70	54	65	50	56	59
356	1391	1365	1411	1399	1400	1384	1408	1403	1372	1475	1400.8	68	50	50	68	59	70	54	65	51	56	59.1
357	1395	1369	1415	1407	1403	1389	1410	1406	1380	1477	1405.1	68	51	51	68	59	70	54	65	51	56	59.3
358	1398	1378	1418	1411	1407	1391	1414	1412	1385	1484	1409.8	70	51	51	68	59	70	54	65	51	57	59.6
359	1404	1383	1424	1419	1410	1399	1423	1418	1391	1493	1416.4	70	51	51	68	60	70	55	65	51	57	59.8
360	1412	1390	1429	1421	1416	1411	1426	1428	1396	1498	1422.7	71	51	51	67	61	70	55	65	51	56	59.8
361	1415	1397	1436	1426	1420	1417	1429	1431	1403	1506	1428	71	51	51	67	62	70	55	65	52	56	60
362	1421	1404	1438	1434	1423	1425	1439	1439	1407	1510	1434	71	51	51	68	62	70	55	65	52	57	60.2
363	1423	1406	1448	1434	1432	1432	1443	1443	1414	1516	1439.1	72	51	52	68	62	70	56	65	52	57	60.5
364	1426	1412	1456	1438	1443	1435	1451	1450	1420	1522	1445.3	72	52	52	68	63	70	56	65	52	57	60.7
365	1433	1415	1458	1442	1447	1439	1456	1460	1427	1530	1450.7	75	53	52	68	63	70	56	65	52	57	61.1
366	1441	1418	1463	1443	1454	1446	1458	1461	1436	1534	1455.4	75	54	52	68	63	70	56	65	52	57	61.2
367	1447	1425	1472	1445	1460	1451	1461	1465	1444	1541	1461.1	76	54	52	69	64	70	56	65	52	57	61.5
368	1449	1432	1476	1449	1469	1454	1463	1468	1450	1544	1465.4	76	54	52	70	65	71	56	65	52	57	61.8
369	1454	1436	1479	1450	1474	1455	1467	1471	1459	1548	1469.3	76	54	52	70	65	71	56	65	53	58	62
370	1457	1440	1480	1455	1478	1460	1472	1475	1462	1556	1473.5	77	54	52	70	65	71	57	65	54	58	62.3
371	1463	1444	1483	1458	1480	1465	1476	1479	1467	1561	1477.6	78	54	52	71	65	71	57	65	54	58	62.5
372	1464	1448	1489	1466	1486	1467	1480	1484	1476	1569	1482.9	78	54	53	70	65	71	59	66	54	59	62.9
373	1466	1454	1496	1479	1493	1476	1489	1488	1481	1572	1489.4	78	53	53	70	65	71	60	66	54	60	63
374	1470	1458	1501	1492	1496	1482	1491	1492	1484	1573	1493.9	78	53	53	70	65	71	60	66	55	60	63.1
375	1473	1466	1506	1498	1502	1489	1495	1496	1485	1578	1498.8	78	53	53	70	65	71	60	66	55	59	63
376	1478	1475	1509	1506	1507	1496	1497	1503	1492	1584	1504.7	78	53	53	71	65	71	59	66	55	59	63
377	1482	1483	1515	1510	1514	1503	1500	1511	1496	1588	1510.2	78	53	53	71	65	71	59	67	55	59	63.1
378	1485	1488	1521	1515	1517	1508	1505	1518	1505	1590	1515.2	78	53	53	71	65	71	60	67	55	59	63.2
379	1490	1494	1524	1518	1521	1514	1509	1523	1518	1594	1520.5	78	53	53	72	65	71	60	68	55	59	63.4
380	1493	1496	1529	1526	1527	1520	1518	1529	1521	1596	1525.5	78	53	53	72	65	72	61	68	55	59	63.6
381	1505	1501	1532	1536	1536	1531	1526	1534	1527	1603	1533.1	78	53	53	72	66	72	61	67	55	59	63.6
382	1510	1503	1538	1545	1542	1535	1528	1541	1533	1611	1538.6	78	53	53	73	67	73	61	67	55	59	63.9
383	1514	1510	1542	1547	1546	1539	1536	1544	1540	1615	1543.3	78	54	53	74	67	74	61	67	56	59	64.3
384	1519	1516	1551	1552	1550	1544	1540	1550	1548	1620	1549	78	54	54	74	67	75	61	68	56	59	64.6
385	1524	1521	1561	1555	1557	1550	1546	1553	1551	1623	1554.1	78	54	54	74	67	75	61	68	56	59	64.6
386	1528	1530	1566	1562	1556	1556	1551	1560	1562	1626	1559.7	78	54	54	74	67	75	62	68	57	60	64.9
387	1531	1533	1574	1568	1561	1558	1555	1569	1568	1627	1564.4	78	54	54	74	67	76	62	68	57	60	65
388	1541	1538	1577	1575	1564	1567	1559	1572	1572	1633	1569.8	78	54	54	75	67	76	62	68	57	60	65.1
389	1547	1541	1583	1578	1564	1571	1562	1574	1578	1638	1573.6	78	54	54	75	68	76	63	68	57	60	65.3
390	1551	1544	1588	1582	1571	1575	1566	1578	1581	1643	1577.9	79	55	55	75	68	76	63	68	57	60	65.6
391	1556	1550	1590	1588	1575	1584	1568	1583	1586	1654	1583.4	79	55	55	75	68	76	63	68	57	60	65.6
392	1562	1556	1595	1598	1580	1593	1572	1587	1593	1662	1589.8	79	55	56	75	68	76	63	68	56	60	65.6
393	1567	1562	1601	1608	1586	1594	1577	1595	1599	1668	1595.7	79	55	56	75	67	76	63	70	56	60	65.7
394	1573	1568	1610	1609	1589	1603	1583	1602	1605	1675	1601.7	79	55	56	76	67	76	63	70	56	60	65.8
395	1575	1572	1616	1615	1595	1611	1586	1604	1611	1684	1606.9	80	55	56	76	67	76	63	70	56	60	65.9
396	1578	1577	1621	1621	1602	1616	1595	1609	1616	1691	1612.6	81	56	56	76	67	76	63	70	56	60	66.1
397	1585	1583	1624	1625	1603	1617	1597	1617	1623	1697	1617.1	82	57	56	77	67	76	63	70	56	59	66.3
398	1592	1591	1630	1633	1610	1622	1604	1619	1630	1704	1623.5	83	57	56	78	67	77	63	70	56	59	66.6
399	1598	1593	1636	1639	1613	1626	1609	1623	1634	1712	1628.3	84	58	56	79	67	79	63	70	57	59	67.2
400	1602	1599	1652	1645	1621	1630	1615	1629	1636	1717	1634.6	84	58	58	79	67	79	63	70	58	59	67.5
401	1611	1603	1655	1651	1623	1635	1618	1638	1641	1723	1639.8	84	58	58	79	67	79	63	70	58	59	67.5
402	1615	1607	1659	1654	1628	1644	1622	1637	1652	1728	1644.6	84	58	58	79	67	79	63	71	58	59	67.6
403	1622	1615	1659	1665	1633	1647	1628	1645	1658	1734	1650.6	84	58	57	79	67	79	63	71	58	60	67.6
404	1625	1616	1666	1671	1637	1657	1633	1646	1662	1739	1655.2	86	58	58	80	67	79	63	72	57	60	68
405	1633	1620	1672	1679	1643	1659	1637	1659	1668	1744	1661.4	86	60	59	80	68	79	63	72	57	60	68.4
406	1644	1629	1676	1685	1649	1662	1646	1664	1671	1752	1667.8	86	60	59	80	68	79	64	72	57	60	68.5
407	1651	1633	1684	1692	1661	1667	1649	1671	1675	1760	1674.3	86	61	59	81	68	79	64	73	57	60	68.8
408	1654	1638	1690	1699	1661	1675	1653	1675	1681	1764	1679	86	61	60	82	68	79	64	73	57	60	69
409	1661	1641	1693	1703	1671	1681	1656	1681	1684	1769	1684	87	61	60	83	69	79	64	73	57	60	69.3
410	1669	1646	1695	1706	1678	1683	1663	1692	1694	1771	1689.7	87	61	60	84	69	80	64	73	57	60	69.5
411	1676	1651	1703	1712	1686	1688	1667	1695	1696	1778	1695.2	87	61	60	85	69	81	65	73	57	59	69.7
412	1685	1654	1712	1723	1693	1690	1671	1704	1701	1782	1701.5	87	61	60	86	69	82	66	73	57	59	70
413	1693	1661	1717	1731	1703	1695	1674	1709	1704	1785	1707.2	87	63	60	86	69	82	67	73	57	59	70.3
414	1698	1663	1721	1732	1710	1701	1681	1715	1706	1790	1711.7	88	63	60	86	69	84	67	73	57	59	70.6
415	1703	1665	1726	1737	1714	1709	1687	1722	1718	1802	1718.3	88	63	60	86	69	84	67	73	58	60	70.8
416	1710	1672	1731	1746	1720	1715	1689	1724	1719	1806	1723.2	88	63	60	86	69	83	67	74	58	60	70.8
417	1713	1677	1731	1753	1729	1724	1692	1733	1725	1812	1728.9	88	63	60	86	69	83	67	74	58	60	70.8
418	1723	1681	1732	1758	1741	1731	1696	1741	1732	1815	1735	88	63	60	86	69	83	67	74	59	60	70.9
419	1734	1687	1739	1760	1752	1736	1703	1746	1739	1822	1741.8	88	64	60	86	69	85	67	74	59	60	71.2
420	1738	1695	1750	1766	1754	1743	1710	1753	1743	1829	1748.1	88	64	60	86	69	85	68	74	59	60	71.3
421	1741	1704	1756	1773	1758	1751	1716	1763	1752	1834	1754.8	88	64	60	86	70	85	68	76	59	60	71.6
422	1745	1713	1768	1778	1765	1755	1723	1768	1761	1841	1761.7	88	64	60	86	71	85	68	76	59	61	71.8
423	1751	1719	1774	1789	1770	1762	1728	1775	1765	1845	1767.8	88	64	60	86	71	85	69	79	59	61	72.2
424	1755	1721	1779	1799	1780	1765	1734	1781	1770	1853	1773.7	88	64	60	87	71	85	69	80	59	61	72.4
425	1769	1729	1787	1802	1786	1770	1738	1790	1772	1862	1780.5	88	64	60	88	71	85	69	80	60	61	72.6
426	1773	1732	1790	1813	1789	1778	1746	1792	1778	1864	1785.5	88	64	60	88	71	85	69	80	60	61	72.6
427	1776	1737	1797	1818	1793	1779	1752	1800	1781	1874	1790.7	88	65	60	88	71	86	69	80	60	61	72.8
428	1780	1739	1803	1825	1799	1785	1756	1808	1784	1882	1796.1	88	65	60	88	72	86	69	80	60	61	72.9
429	1786	1745	1807	1830	1807	1798	1764	1813	1795	1885	1803	88	67	60	88	72	86	71	80	60	61	73.3
430	1794	1750	1817	1835	1819	1803	1770	1821	1802	1894	1810.5	88	67	60	88	72	86	71	80	60	62	73.4
431	1808	1757	1824	1847	1821	1811	1775	1831	1807	1902	1818.3	88	67	60	88	72	86	72	80	60	63	73.6
432	1809	1764	1833	1847	1825	1817	1781	1842	1811	1909	1823.8	89	67	60	88	72	85	73	80	61	64	73.9
433	1815	1771	1840	1852	1835	1826	1789	1851	1815	1914	1830.8	89	67	60	89	72	86	73	80	61	64	74.1
434	1826	1779	1847	1859	1841	1832	1801	1856	1824	1924	1838.9	89	67	60	89	72	86	73	79	61	64	74
435	1830	1782	1858	1870	1849	1837	1808	1865	1828	1932	1845.9	90	67	60	89	72	86	73	80	61	65	74.3
436	1837	1786	1869	1878	1859	1845	1815	1872	1841	1936	1853.8	90	67	61	89	72	86	75	80	61	65	74.6
437	1842	1793	1875	1887	1865	1852	1823	1877	1847	1940	1860.1	90	68	63	89	72	86	75	80	62	65	75
438	1851	1803	1886	1893	1874	1858	1830	1882	1854	1943	1867.4	90	68	63	89	72	86	75	80	62	65	75
439	1859	1812	1892	1900	1882	1864	1836	1885	1860	1950	1874	91	68	63	89	73	86	75	79	62	66	75.2
440	1866	1817	1897	1902	1890	1866	1840	1891	1865	1954	1878.8	91	67	63	89	73	86	75	80	62	68	75.4
441	1871	1819	1903	1905	1898	1872	1848	1896	1873	1961	1884.6	91	66	63	90	73	86	76	80	63	68	75.6
442	1879	1829	1911	1912	1906	1876	1849	1905	1875	1964	1890.6	91	66	63	90	74	87	76	80	63	69	75.9
443	1883	1832	1916	1920	1915	1882	1853	1913	1886	1970	1897	91	66	63	90	74	87	77	80	63	70	76.1
444	1892	1836	1924	1927	1921	1885	1858	1925	1895	1975	1903.8	92	66	63	91	74	88	76	79	63	70	76.2
445	1904	1846	1932	1942	1925	1889	1864	1938	1904	1988	1913.2	92	67	63	93	74	88	77	79	63	71	76.7
446	1908	1854	1935	1948	1929	1893	1868	1940	1912	1992	1917.9	94	68	63	94	74	89	77	79	63	72	77.3
447	1917	1860	1937	1956	1938	1899	1880	1945	1917	2000	1924.9	94	68	64	96	74	89	77	80	64	73	77.9
448	1923	1867	1946	1961	1948	1904	1887	1951	1923	2009	1931.9	94	68	64	96	74	89	78	82	64	73	78.2
449	1934	1873	1957	1969	1953	1912	1894	1960	1928	2017	1939.7	94	68	64	96	75	89	79	82	64	73	78.4
450	1943	1876	1962	1973	1958	1917	1898	1964	1941	2025	1945.7	95	69	64	96	75	89	79	82	64	74	78.7
451	1946	1884	1973	1978	1961	1920	1907	1971	1952	2033	1952.5	96	72	64	96	75	89	79	82	65	74	79.2
452	1953	1895	1977	1979	1967	1929	1913	1978	1958	2041	1959	96	72	64	96	76	90	79	82	65	74	79.4
453	1962	1903	1985	1988	1973	1933	1920	1985	1967	2048	1966.4	96	72	64	97	76	90	79	82	66	74	79.6
454	1973	1908	1996	1993	1980	1941	1927	1989	1975	2054	1973.6	96	72	65	97	76	91	80	82	66	74	79.9
455	1984	1912	2003	1998	1987	1947	1934	1995	1983	2064	1980.7	96	73	65	97	77	92	80	82	66	74	80.2
456	1988	1920	2011	2009	1990	1950	1937	2000	1986	2068	1985.9	96	73	66	97	78	93	80	82	66	74	80.5
457	1997	1931	2023	2018	2001	1960	1946	2009	1997	2080	1996.2	97	76	66	98	78	93	79	81	66	74	80.8
458	2008	1942	2030	2025	2004	1965	1949	2011	2006	2093	2003.3	97	76	66	100	78	93	79	82	66	74	81.1
459	2016	1948	2038	2033	2010	1970	1959	2019	2018	2096	2010.7	97	76	66	100	78	93	79	82	67	75	81.3
460	2022	1957	2047	2044	2016	1974	1970	2029	2025	2105	2018.9	97	77	66	100	78	94	79	83	67	75	81.6
461	2033	1961	2059	2052	2019	1978	1981	2036	2032	2108	2025.9	98	77	67	100	78	94	79	83	67	76	81.9
462	2041	1974	2060	2057	2029	1982	1990	2041	2042	2113	2032.9	98	77	67	100	80	94	79	83	67	76	82.1
463	2049	1981	2071	2066	2034	1988	1998	2050	2051	2124	2041.2	99	77	68	100	80	95	79	85	69	78	83
464	2059	1987	2082	2075	2039	1993	2008	2058	2055	2126	2048.2	101	78	68	100	80	95	79	85	69	79	83.4
465	2069	1995	2095	2084	2048	2002	2016	2067	2061	2134	2057.1	101	78	68	101	80	95	79	85	70	79	83.6
466	2078	2010	2100	2092	2053	2011	2023	2070	2068	2143	2064.8	101	78	68	101	80	97	80	85	70	80	84
467	2084	2013	2111	2098	2057	2020	2028	2079	2074	2152	2071.6	102	78	68	101	83	99	80	86	70	80	84.7
468	2091	2018	2117	2104	2065	2022	2037	2080	2080	2164	2077.8	103	78	68	103	84	99	81	86	70	81	85.3
469	2100	2024	2121	2114	2069	2034	2050	2086	2088	2176	2086.2	103	78	69	103	84	99	81	86	70	81	85.4
470	2109	2028	2129	2121	2078	2044	2059	2100	2097	2183	2094.8	103	79	69	103	84	102	81	87	70	81	85.9
471	2113	2037	2137	2133	2086	2051	2073	2106	2111	2192	2103.9	103	78	69	104	85	103	83	88	70	81	86.4
472	2116	2043	2149	2141	2089	2056	2082	2114	2119	2199	2110.8	104	78	69	104	85	103	85	88	70	81	86.7
473	2123	2058	2156	2147	2099	2060	2095	2126	2131	2206	2120.1	104	79	69	104	85	103	86	88	70	81	86.9
474	2129	2063	2160	2149	2102	2072	2100	2135	2139	2213	2126.2	104	79	69	105	85	103	86	88	70	82	87.1
475	2137	2071	2167	2155	2113	2081	2109	2141	2147	2225	2134.6	104	79	69	105	87	103	86	89	70	82	87.4
476	2142	2079	2173	2164	2120	2087	2120	2152	2151	2232	2142	104	80	69	105	88	104	87	89	71	82	87.9
477	2155	2085	2179	2174	2130	2092	2128	2163	2163	2239	2150.8	104	81	69	106	89	104	87	90	71	82	88.3
478	2165	2088	2184	2180	2137	2103	2133	2169	2169	2246	2157.4	105	81	69	106	89	104	87	90	71	82	88.4
479	2179	2094	2191	2187	2148	2111	2141	2177	2180	2267	2167.5	106	81	69	107	89	104	89	90	70	82	88.7
480	2187	2103	2201	2200	2156	2121	2152	2181	2187	2273	2176.1	106	81	70	107	89	104	89	90	71	82	88.9
481	2193	2107	2206	2206	2163	2126	2162	2187	2198	2285	2183.3	108	81	71	108	89	105	90	92	71	82	89.7
482	2203	2110	2216	2214	2173	2141	2171	2199	2206	2297	2193	108	82	71	108	89	106	90	92	71	82	89.9
483	2213	2118	2226	2220	2180	2153	2177	2205	2210	2301	2200.3	108	82	71	108	89	106	92	92	71	82	90.1
484	2222	2126	2236	2234	2188	2158	2182	2215	2218	2307	2208.6	108	82	71	108	89	107	91	93	71	84	90.4
485	2232	2132	2237	2241	2198	2165	2187	2227	2231	2315	2216.5	108	82	71	108	89	108	91	93	70	84	90.4
486	2240	2140	2244	2245	2206	2172	2197	2232	2235	2322	2223.3	109	82	71	109	89	108	91	93	70	84	90.6
487	2247	2145	2250	2251	2213	2180	2211	2235	2244	2333	2230.9	109	83	71	109	89	109	92	93	70	84	90.9
488	2252	2150	2257	2260	2219	2189	2222	2240	2254	2334	2237.7	110	83	71	109	89	111	92	93	70	84	91.2
489	2261	2159	2260	2271	2226	2199	2233	2251	2264	2339	2246.3	111	83	72	109	89	111	93	93	70	84	91.5
490	2266	2169	2267	2286	2234	2206	2250	2259	2271	2349	2255.7	111	83	72	109	90	113	93	93	70	84	91.8
491	2277	2179	2279	2294	2241	2221	2256	2265	2279	2367	2265.8	113	85	72	109	90	114	93	94	70	84	92.4
492	2285	2187	2286	2299	2250	2232	2267	2273	2293	2379	2275.1	114	85	71	109	92	115	93	95	72	84	93
493	2293	2195	2297	2312	2257	2238	2273	2282	2298	2388	2283.3	114	85	72	108	92	115	93	96	72	84	93.1
494	2304	2207	2307	2324	2262	2242	2284	2287	2302	2399	2291.8	114	85	73	108	94	116	93	96	73	85	93.7
495	2316	2211	2319	2334	2272	2258	2293	2303	2309	2413	2302.8	114	85	73	108	94	118	94	97	73	85	94.1
496	2323	2221	2327	2338	2281	2271	2304	2315	2316	2420	2311.6	115	85	73	108	94	120	94	99	73	85	94.6
497	2330	2227	2332	2348	2289	2281	2313	2329	2324	2426	2319.9	117	85	72	108	95	120	94	99	74	87	95.1
498	2341	2237	2342	2360	2293	2290	2320	2341	2337	2436	2329.7	117	84	72	108	95	121	94	101	75	88	95.5
499	2348	2242	2350	2371	2304	2303	2331	2352	2347	2450	2339.8	118	84	73	108	95	121	94	101	75	88	95.7
500	2357	2251	2357	2375	2314	2310	2344	2364	2352	2458	2348.2	118	83	74	108	95	122	94	102	75	89	96
501	2361	2257	2364	2379	2317	2317	2351	2374	2363	2466	2354.9	119	83	74	110	95	122	94	102	75	89	96.3
502	2371	2268	2371	2389	2322	2327	2360	2386	2372	2481	2364.7	119	83	76	110	96	121	94	102	76	89	96.6
503	2374	2278	2373	2397	2332	2341	2369	2391	2376	2493	2372.4	120	83	76	109	97	121	94	102	76	89	96.7
504	2387	2288	2379	2402	2345	2353	2380	2403	2381	2500	2381.8	120	83	76	109	97	121	94	103	76	89	96.8
505	2395	2296	2389	2412	2358	2360	2385	2415	2393	2505	2390.8	119	83	76	109	97	121	94	103	77	89	96.8
506	2402	2305	2397	2420	2369	2375	2394	2423	2405	2516	2400.6	119	83	77	109	99	121	94	104	78	89	97.3
507	2410	2312	2404	2427	2375	2386	2401	2430	2415	2527	2408.7	122	83	78	109	99	121	93	104	78	89	97.6
508	2421	2320	2416	2439	2386	2400	2412	2446	2427	2535	2420.2	122	83	78	110	99	121	93	104	78	89	97.7
509	2429	2331	2429	2446	2393	2407	2423	2454	2438	2543	2429.3	122	83	79	110	99	121	94	104	79	89	98
510	2440	2336	2440	2458	2408	2417	2433	2461	2446	2555	2439.4	122	83	80	111	99	122	94	106	79	89	98.5
511	2450	2344	2453	2464	2414	2428	2445	2473	2456	2565	2449.2	124	83	80	111	99	122	94	107	80	90	99
512	2458	2351	2460	2477	2426	2440	2452	2482	2461	2575	2458.2	124	83	80	111	100	122	94	109	81	90	99.4
513	2465	2363	2466	2487	2431	2450	2466	2493	2473	2586	2468	125	85	80	110	100	122	94	109	82	90	99.7
514	2471	2377	2477	2495	2439	2458	2475	2501	2479	2597	2476.9	126	86	81	111	100	123	94	109	83	91	100.4
515	2485	2389	2486	2509	2453	2467	2484	2506	2485	2608	2487.2	127	86	82	112	100	124	94	109	84	91	100.9
516	2494	2407	2492	2514	2462	2487	2491	2509	2494	2618	2496.8	127	86	83	112	100	124	94	109	84	91	101
517	2502	2415	2497	2519	2475	2498	2505	2522	2505	2623	2506.1	127	86	84	112	101	124	97	109	84	91	101.5
518	2514	2424	2506	2527	2485	2510	2522	2528	2513	2636	2516.5	127	86	84	113	101	125	97	109	85	91	101.8
519	2520	2433	2515	2538	2495	2522	2531	2541	2516	2639	2525	128	86	84	114	101	124	97	109	86	91	102
520	2533	2442	2531	2542	2507	2529	2542	2547	2525	2646	2534.4	128	86	85	115	101	125	98	109	86	91	102.4
521	2542	2455	2547	2554	2513	2538	2553	2559	2532	2652	2544.5	129	86	85	115	100	125	98	108	87	91	102.4
522	2549	2469	2556	2564	2523	2547	2556	2568	2540	2664	2553.6	129	86	85	115	102	125	98	109	87	91	102.7
523	2555	2482	2565	2570	2532	2551	2566	2577	2547	2677	2562.2	129	86	85	115	102	125	98	110	88	91	102.9
524	2567	2487	2576	2576	2542	2561	2579	2585	2554	2692	2571.9	129	87	85	116	102	126	98	111	89	91	103.4
525	2577	2496	2585	2585	2554	2566	2592	2591	2561	2704	2581.1	130	87	85	116	102	126	98	112	90	94	104
526	2583	2504	2596	2598	2559	2577	2600	2600	2569	2714	2590	130	87	85	116	102	126	97	113	90	95	104.1
527	2594	2514	2610	2616	2569	2581	2610	2604	2578	2725	2600.1	131	87	85	116	103	127	97	115	92	96	104.9
528	2599	2527	2624	2624	2578	2587	2619	2612	2587	2731	2608.8	131	90	85	117	102	128	97	115	92	96	105.3
529	2605	2534	2635	2630	2585	2594	2631	2621	2593	2743	2617.1	132	90	85	118	102	128	97	115	92	96	105.5
530	2615	2543	2643	2643	2595	2600	2646	2626	2610	2757	2627.8	132	90	85	118	103	128	97	116	91	96	105.6
531	2624	2553	2655	2657	2611	2603	2669	2633	2619	2764	2638.8	132	90	86	119	103	128	97	116	91	96	105.8
532	2633	2567	2667	2670	2623	2610	2683	2642	2629	2782	2650.6	133	90	87	120	104	127	97	116	91	95	106
533	2638	2578	2677	2676	2630	2624	2691	2652	2637	2799	2660.2	133	90	87	123	103	127	98	116	91	95	106.3
534	2648	2587	2685	2684	2642	2633	2701	2658	2646	2805	2668.9	133	90	87	123	103	127	98	116	92	95	106.4
535	2657	2597	2694	2694	2655	2636	2710	2671	2658	2818	2679	134	90	90	123	103	127	98	116	92	95	106.8
536	2665	2604	2704	2700	2668	2644	2718	2677	2670	2822	2687.2	134	89	91	124	103	128	99	116	93	95	107.2
537	2672	2618	2713	2710	2678	2650	2727	2685	2674	2840	2696.7	135	90	91	125	102	128	99	117	93	95	107.5
538	2674	2631	2725	2722	2691	2663	2730	2700	2685	2847	2706.8	135	90	91	125	102	128	99	117	95	95	107.7
539	2685	2642	2729	2732	2699	2672	2739	2706	2690	2853	2714.7	135	90	92	126	103	128	99	118	95	95	108.1
540	2690	2647	2741	2742	2709	2684	2744	2713	2699	2863	2723.2	136	90	92	126	104	128	100	117	95	95	108.3
541	2699	2655	2749	2754	2716	2691	2754	2716	2713	2871	2731.8	138	92	93	126	105	128	100	117	96	96	109.1
542	2715	2665	2760	2765	2723	2707	2765	2722	2722	2879	2742.3	140	92	93	126	105	129	100	118	96	97	109.6
543	2722	2672	2768	2780	2733	2720	2773	2734	2737	2889	2752.8	140	92	93	128	105	128	100	118	96	97	109.7
544	2728	2684	2781	2792	2749	2728	2780	2754	2749	2897	2764.2	140	92	93	129	105	128	100	118	95	97	109.7
545	2735	2696	2788	2804	2756	2739	2789	2759	2763	2912	2774.1	141	92	93	130	106	129	101	119	96	97	110.4
546	2745	2706	2799	2815	2770	2748	2797	2767	2779	2921	2784.7	141	92	94	131	107	130	101	119	96	96	110.7
547	2761	2717	2809	2824	2777	2763	2802	2777	2788	2933	2795.1	141	92	95	132	108	131	101	119	96	96	111.1
548	2769	2729	2813	2836	2791	2773	2810	2787	2801	2940	2804.9	142	92	96	133	109	132	100	119	96	96	111.5
549	2781	2739	2822	2846	2801	2786	2818	2796	2811	2957	2815.7	144	92	96	133	109	133	100	119	96	97	111.9
550	2790	2748	2830	2857	2807	2794	2823	2804	2818	2965	2823.6	144	92	97	133	109	133	101	119	96	97	112.1
551	2798	2760	2842	2863	2817	2808	2826	2817	2827	2975	2833.3	144	93	97	133	111	134	101	120	96	97	112.6
552	2813	2776	2851	2871	2829	2819	2834	2824	2833	2990	2844	144	93	97	133	111	134	104	120	96	97	112.9
553	2822	2786	2862	2876	2841	2831	2839	2837	2844	3001	2853.9	144	93	97	133	111	134	103	120	97	97	112.9
554	2827	2790	2868	2889	2851	2840	2848	2849	2856	3011	2862.9	144	93	96	133	111	135	103	120	97	97	112.9
555	2837	2802	2875	2899	2866	2847	2854	2864	2862	3025	2873.1	145	94	96	134	112	135	103	120	97	98	113.4
556	2846	2811	2888	2906	2878	2856	2860	2873	2870	3037	2882.5	145	94	96	134	112	136	103	120	97	98	113.5
557	2856	2815	2904	2914	2892	2867	2870	2886	2882	3043	2892.9	145	96	97	134	113	137	103	120	97	97	113.9
558	2867	2824	2917	2923	2903	2879	2875	2900	2892	3048	2902.8	145	96	97	136	113	137	103	121	97	98	114.3
559	2879	2837	2928	2931	2909	2888	2882	2913	2910	3060	2913.7	146	96	98	138	113	138	104	121	98	97	114.9
560	2893	2846	2935	2939	2917	2898	2898	2919	2917	3072	2923.4	146	97	99	138	114	138	104	123	98	97	115.4
561	2899	2853	2944	2947	2926	2909	2912	2932	2928	3085	2933.5	147	97	100	138	115	138	104	124	98	99	116
562	2911	2864	2960	2955	2938	2929	2920	2942	2935	3096	2945	147	97	100	140	116	138	104	125	99	99	116.5
563	2929	2877	2966	2969	2952	2941	2929	2952	2944	3111	2957	148	98	100	140	116	139	104	126	99	99	116.9
564	2938	2887	2978	2976	2961	2954	2943	2960	2955	3123	2967.5	149	98	100	140	118	141	104	126	99	100	117.5
565	2945	2895	2990	2983	2979	2964	2952	2966	2967	3133	2977.4	149	98	100	141	118	141	104	127	99	99	117.6
566	2953	2904	3001	2993	2987	2972	2962	2975	2986	3139	2987.2	150	98	101	143	118	141	104	127	99	100	118.1
567	2969	2914	3011	3007	2999	2982	2970	2982	2998	3155	2998.7	150	98	101	142	119	141	104	128	100	100	118.3
568	2974	2929	3021	3020	3010	2992	2977	2990	3006	3166	3008.5	150	98	101	142	119	140	104	128	100	100	118.2
569	2976	2938	3028	3031	3020	3006	2988	3004	3013	3175	3017.9	150	98	101	142	121	140	105	128	100	100	118.5
570	2987	2947	3036	3040	3034	3017	3000	3014	3021	3183	3027.9	151	98	101	142	121	141	105	128	100	100	118.7
571	3001	2958	3044	3049	3043	3028	3011	3024	3027	3195	3038	151	98	101	142	122	141	105	128	100	100	118.8
572	3018	2965	3066	3057	3055	3038	3027	3031	3043	3207	3050.7	153	98	101	142	122	142	105	128	100	101	119.2
573	3027	2974	3070	3065	3068	3043	3037	3040	3046	3215	3058.5	153	99	102	142	122	143	105	129	100	102	119.7
574	3034	2986	3081	3076	3072	3056	3048	3054	3062	3222	3069.1	155	99	102	142	122	143	106	129	100	102	120
575	3043	2994	3096	3089	3081	3062	3057	3066	3068	3229	3078.5	155	99	103	142	122	143	106	129	100	102	120.1
576	3053	3001	3107	3104	3093	3071	3065	3080	3083	3239	3089.6	155	98	103	142	122	143	107	129	100	102	120.1
577	3057	3009	3124	3113	3105	3079	3075	3099	3087	3248	3099.6	157	98	105	142	123	143	107	130	100	103	120.8
578	3069	3020	3138	3122	3113	3089	3084	3117	3092	3260	3110.4	158	99	105	141	124	143	107	131	100	103	121.1
579	3081	3030	3151	3130	3122	3094	3102	3126	3101	3274	3121.1	159	99	106	142	124	143	107	131	100	103	121.4
580	3087	3038	3160	3145	3131	3100	3119	3136	3116	3282	3131.4	160	100	107	142	124	143	109	131	102	103	122.1
581	3094	3048	3169	3161	3142	3110	3125	3149	3130	3291	3141.9	160	102	107	143	125	145	109	132	102	104	122.9
582	3103	3053	3188	3172	3149	3124	3136	3160	3142	3303	3153	161	102	107	143	125	145	110	132	102	104	123.1
583	3111	3057	3201	3191	3166	3136	3141	3168	3159	3309	3163.9	163	102	107	142	126	145	110	133	102	104	123.4
584	3127	3067	3213	3200	3181	3144	3148	3179	3169	3320	3174.8	165	102	107	142	127	146	110	134	102	105	124
585	3134	3077	3223	3218	3192	3149	3157	3205	3180	3334	3186.9	165	102	107	142	127	146	110	135	102	105	124.1
586	3148	3088	3240	3227	3201	3164	3167	3218	3195	3348	3199.6	165	101	107	141	128	146	110	135	102	106	124.1
587	3157	3105	3254	3240	3209	3175	3180	3226	3206	3355	3210.7	166	102	107	141	128	146	110	135	102	108	124.5
588	3165	3128	3260	3252	3222	3184	3194	3235	3212	3368	3222	166	102	106	142	128	146	110	136	102	109	124.7
589	3173	3141	3272	3261	3235	3194	3211	3254	3225	3376	3234.2	168	102	106	144	129	146	111	137	103	109	125.5
590	3187	3153	3283	3269	3248	3205	3222	3273	3241	3387	3246.8	168	103	105	144	129	147	112	138	103	111	126
591	3205	3164	3294	3281	3255	3210	3231	3281	3256	3401	3257.8	168	103	105	145	130	148	112	138	103	111	126.3
592	3218	3176	3307	3291	3261	3217	3241	3292	3264	3414	3268.1	171	105	105	147	131	149	112	138	103	111	127.2
593	3228	3187	3316	3301	3273	3228	3251	3302	3271	3427	3278.4	171	105	105	146	133	149	113	138	103	111	127.4
594	3245	3197	3328	3308	3288	3236	3256	3319	3277	3435	3288.9	171	106	105	147	133	149	113	139	103	112	127.8
595	3256	3204	3340	3324	3302	3244	3265	3332	3292	3445	3300.4	171	107	105	147	133	149	113	140	103	113	128.1
596	3267	3218	3351	3332	3308	3256	3279	3342	3300	3454	3310.7	170	107	105	148	133	149	114	141	104	117	128.8
597	3279	3226	3362	3350	3320	3268	3295	3350	3311	3463	3322.4	170	107	104	148	133	149	114	141	104	117	128.7
598	3294	3237	3371	3365	3336	3281	3311	3362	3322	3475	3335.4	171	107	105	148	133	148	114	141	104	117	128.8
599	3305	3249	3384	3379	3345	3293	3318	3374	3340	3485	3347.2	171	107	105	148	133	149	115	141	104	117	129
600	3323	3262	3400	3387	3363	3304	3325	3386	3357	3499	3360.6	171	106	105	154	135	150	115	141	105	118	130
601	3340	3273	3413	3397	3379	3315	3331	3394	3372	3507	3372.1	172	107	105	155	135	151	115	140	107	118	130.5
602	3347	3283	3426	3413	3389	3327	3338	3405	3382	3524	3383.4	174	107	104	156	135	152	117	140	107	119	131.1
603	3361	3292	3435	3425	3404	3334	3350	3414	3397	3541	3395.3	174	107	104	157	136	152	119	140	106	120	131.5
604	3370	3304	3445	3443	3418	3342	3360	3433	3413	3551	3407.9	174	107	104	158	138	152	119	140	106	119	131.7
605	3381	3315	3457	3456	3430	3354	3372	3450	3426	3567	3420.8	174	108	104	159	138	153	119	140	106	118	131.9
606	3395	3329	3471	3467	3442	3368	3386	3469	3438	3578	3434.3	174	108	104	159	138	154	120	140	106	119	132.2
607	3407	3339	3487	3479	3456	3377	3402	3475	3456	3591	3446.9	174	111	105	159	139	154	121	141	106	120	133
608	3422	3348	3497	3495	3467	3392	3409	3487	3475	3605	3459.7	174	111	105	159	139	154	121	141	106	120	133
609	3433	3360	3504	3511	3479	3400	3420	3503	3487	3612	3470.9	175	111	106	159	139	156	121	141	106	120	133.4
610	3443	3372	3519	3522	3480	3407	3435	3520	3503	3634	3483.5	178	111	106	159	138	156	122	141	106	120	133.7
611	3452	3383	3531	3538	3499	3420	3447	3531	3514	3643	3495.8	179	112	106	160	138	157	123	141	106	120	134.2
612	3466	3395	3546	3549	3511	3434	3464	3550	3527	3660	3510.2	179	112	106	161	138	157	123	142	106	119	134.3
613	3478	3402	3559	3565	3532	3443	3468	3565	3542	3677	3523.1	179	113	108	162	138	157	124	143	106	119	134.9
614	3490	3417	3571	3579	3540	3456	3479	3575	3559	3690	3535.6	180	114	108	162	139	157	125	143	106	120	135.4
615	3498	3429	3583	3586	3554	3470	3487	3593	3566	3704	3547	180	114	108	163	139	156	125	143	106	121	135.5
616	3514	3445	3596	3600	3564	3488	3501	3609	3585	3716	3561.8	180	114	108	164	140	157	125	144	107	121	136
617	3527	3458	3605	3614	3576	3500	3512	3621	3596	3723	3573.2	180	115	108	166	139	158	126	145	107	120	136.4
618	3538	3470	3628	3629	3589	3509	3525	3630	3605	3735	3585.8	181	115	108	167	139	158	126	147	107	121	136.9
619	3544	3484	3639	3643	3602	3524	3536	3638	3614	3745	3596.9	183	116	109	169	139	159	127	148	108	122	138
620	3557	3491	3653	3649	3616	3539	3548	3651	3626	3756	3608.6	184	116	111	170	139	159	128	148	109	123	138.7
621	3576	3504	3663	3669	3622	3554	3558	3663	3645	3771	3622.5	184	118	111	172	139	160	128	149	109	124	139.4
622	3592	3519	3681	3682	3633	3569	3563	3675	3660	3798	3637.2	184	118	110	172	140	160	128	152	109	124	139.7
623	3606	3526	3695	3697	3640	3585	3576	3690	3672	3814	3650.1	184	119	112	172	141	159	128	153	109	124	140.1
624	3621	3541	3709	3707	3651	3598	3587	3704	3680	3822	3662	185	120	114	173	142	160	131	153	112	124	141.4
625	3631	3548	3725	3727	3666	3610	3604	3716	3695	3832	3675.4	186	120	114	173	142	161	131	154	112	124	141.7
626	3644	3561	3738	3747	3679	3617	3618	3731	3709	3848	3689.2	188	120	114	175	143	163	130	155	113	124	142.5
627	3665	3572	3758	3763	3699	3627	3632	3743	3724	3861	3704.4	189	120	113	175	144	164	129	155	113	124	142.6
628	3679	3584	3767	3774	3711	3638	3646	3756	3742	3874	3717.1	189	120	114	175	144	164	130	156	113	124	142.9
629	3704	3596	3779	3792	3719	3653	3662	3763	3754	3886	3730.8	189	121	114	175	144	166	131	156	113	126	143.5
630	3722	3622	3785	3806	3736	3671	3677	3767	3770	3904	3746	189	121	115	175	145	167	131	156	113	126	143.8
631	3743	3629	3799	3818	3753	3691	3689	3776	3789	3920	3760.7	189	121	116	176	145	169	131	156	113	128	144.4
632	3755	3643	3812	3837	3765	3704	3703	3783	3804	3936	3774.2	190	121	116	176	145	169	130	156	114	128	144.5
633	3776	3649	3821	3851	3773	3718	3714	3804	3819	3953	3787.8	191	123	116	175	145	171	133	157	117	128	145.6
634	3790	3661	3834	3871	3788	3730	3734	3820	3829	3966	3802.3	191	123	116	174	145	171	133	157	117	129	145.6
635	3813	3671	3847	3879	3803	3740	3750	3834	3844	3980	3816.1	191	124	117	174	145	172	135	157	119	130	146.4
636	3826	3683	3854	3896	3820	3756	3770	3847	3856	3992	3830	194	125	117	174	144	173	135	157	119	131	146.9
637	3836	3688	3875	3901	3829	3776	3790	3860	3872	4003	3843	196	125	117	174	146	174	136	157	119	130	147.4
638	3851	3705	3894	3912	3850	3787	3803	3873	3886	4027	3858.8	196	127	117	174	146	174	137	157	121	129	147.8
639	3873	3715	3912	3928	3863	3795	3817	3882	3901	4042	3872.8	196	128	117	175	146	175	137	158	121	130	148.3
640	3884	3727	3928	3939	3881	3809	3827	3895	3911	4059	3886	197	128	118	175	147	175	138	158	121	130	148.7
641	3900	3743	3941	3956	3891	3825	3841	3919	3931	4077	3902.4	199	128	118	177	148	178	139	159	124	131	150.1
642	3920	3754	3953	3969	3898	3835	3863	3935	3948	4097	3917.2	199	128	118	177	152	180	140	159	124	131	150.8
643	3934	3770	3968	3987	3906	3852	3873	3956	3961	4109	3931.6	200	130	120	177	152	180	140	159	124	132	151.4
644	3942	3787	3985	3996	3915	3865	3892	3971	3974	4118	3944.5	202	133	120	177	152	183	141	160	124	133	152.5
645	3957	3806	3996	4013	3932	3880	3908	3982	3988	4132	3959.4	201	134	120	178	154	184	142	162	124	134	153.3
646	3966	3821	4007	4021	3940	3891	3926	4000	3999	4151	3972.2	201	134	121	177	155	188	143	163	125	135	154.2
647	3988	3841	4026	4036	3949	3909	3954	4022	4014	4159	3989.8	201	136	121	178	155	187	145	163	125	137	154.8
648	3998	3860	4041	4052	3964	3929	3968	4040	4035	4174	4006.1	202	136	121	178	155	187	145	163	126	137	155
649	4010	3871	4057	4069	3981	3946	3984	4056	4045	4185	4020.4	202	136	122	179	156	187	147	165	126	137	155.7
650	4022	3887	4076	4086	3996	3957	3993	4068	4054	4200	4033.9	202	136	122	179	157	188	146	165	125	137	155.7
651	4033	3912	4088	4101	4006	3977	4016	4085	4070	4217	4050.5	203	136	122	179	158	191	147	165	125	137	156.3
652	4046	3935	4098	4113	4025	3995	4031	4098	4091	4237	4066.9	203	136	122	180	160	190	148	165	125	137	156.6
653	4063	3948	4119	4126	4041	4009	4040	4107	4103	4263	4081.9	205	137	123	181	160	190	149	166	127	136	157.4
654	4079	3956	4133	4142	4059	4026	4054	4127	4121	4277	4097.4	205	137	123	182	162	191	150	168	128	135	158.1
655	4100	3972	4145	4158	4078	4049	4068	4139	4134	4293	4113.6	205	137	124	182	162	193	150	168	127	135	158.3
656	4118	3990	4158	4173	4088	4061	4076	4159	4152	4306	4128.1	207	137	124	184	162	193	151	168	127	135	158.8
657	4131	4001	4166	4190	4102	4081	4087	4173	4170	4320	4142.1	207	137	124	185	162	193	152	169	127	135	159.1
658	4147	4009	4178	4213	4114	4092	4102	4182	4177	4336	4155	208	138	124	184	163	194	152	169	127	135	159.4
659	4157	4023	4192	4224	4125	4112	4120	4193	4191	4348	4168.5	210	138	124	184	163	195	152	169	127	136	159.8
660	4176	4036	4202	4236	4143	4122	4135	4207	4208	4361	4182.6	210	138	124	185	163	198	152	170	128	136	160.4
661	4182	4054	4221	4247	4156	4147	4156	4218	4222	4383	4198.6	212	138	123	188	163	199	152	171	128	137	161.1
662	4192	4063	4231	4261	4169	4160	4175	4235	4232	4404	4212.2	212	138	123	189	163	200	152	173	129	137	161.6
663	4219	4076	4244	4281	4182	4169	4193	4247	4251	4420	4228.2	213	139	123	189	163	201	152	174	129	137	162
664	4231	4087	4257	4295	4196	4182	4210	4261	4270	4442	4243.1	215	140	122	189	164	201	152	174	129	138	162.4
665	4248	4096	4276	4308	4219	4200	4227	4282	4280	4460	4259.6	215	140	124	189	165	201	152	174	130	139	162.9
666	4265	4117	4296	4324	4229	4228	4249	4303	4297	4478	4278.6	215	140	124	189	165	201	154	175	130	140	163.3
667	4282	4136	4314	4343	4248	4244	4267	4314	4310	4491	4294.9	215	140	124	189	165	201	154	176	130	140	163.4
668	4298	4150	4333	4356	4266	4255	4284	4330	4314	4508	4309.4	215	141	124	189	165	201	154	178	131	140	163.8
669	4313	4158	4348	4369	4284	4267	4299	4346	4334	4527	4324.5	217	142	125	189	166	203	155	178	131	140	164.6
670	4329	4167	4361	4378	4304	4290	4322	4356	4356	4543	4340.6	218	143	125	190	166	205	155	177	131	140	165
671	4350	4184	4381	4395	4319	4307	4347	4371	4367	4560	4358.1	218	145	125	191	166	205	158	180	132	142	166.2
672	4370	4199	4399	4411	4333	4322	4361	4380	4384	4577	4373.6	222	146	125	192	167	205	158	181	132	142	167
673	4379	4217	4412	4429	4343	4343	4381	4392	4401	4602	4389.9	223	146	125	192	167	205	160	181	133	142	167.4
674	4393	4230	4431	4445	4354	4358	4399	4407	4416	4616	4404.9	223	146	127	192	168	205	161	181	134	142	167.9
675	4417	4254	4448	4455	4364	4376	4422	4423	4437	4638	4423.4	225	147	127	192	168	206	162	180	135	142	168.4
676	4434	4267	4463	4467	4385	4393	4445	4440	4457	4650	4440.1	225	147	127	193	171	207	162	180	135	143	169
677	4444	4282	4487	4488	4396	4402	4459	4457	4473	4665	4455.3	226	146	127	192	171	207	162	180	135	143	168.9
678	4459	4294	4504	4502	4413	4431	4476	4475	4494	4684	4473.2	226	146	128	193	171	207	162	182	136	143	169.4
679	4478	4311	4524	4516	4423	4441	4488	4496	4516	4703	4489.6	226	146	128	193	172	207	162	183	137	142	169.6
680	4499	4325	4539	4533	4438	4464	4501	4507	4531	4719	4505.6	226	147	128	193	172	208	163	184	136	143	170
681	4515	4341	4552	4557	4452	4485	4516	4528	4548	4734	4522.8	227	147	130	194	173	208	163	186	137	143	170.8
682	4529	4364	4566	4573	4468	4496	4533	4542	4558	4744	4537.3	226	147	130	197	174	208	163	186	140	145	171.6
683	4541	4381	4584	4588	4480	4513	4551	4555	4574	4754	4552.1	228	147	131	198	174	209	164	188	141	146	172.6
684	4562	4396	4603	4607	4497	4533	4562	4573	4593	4767	4569.3	228	148	132	198	174	210	164	189	141	146	173
685	4581	4409	4619	4626	4505	4550	4583	4589	4611	4783	4585.6	230	148	133	198	174	211	165	189	142	146	173.6
686	4600	4420	4629	4645	4526	4566	4600	4600	4624	4807	4601.7	234	149	133	198	174	212	165	190	145	147	174.7
687	4615	4440	4652	4661	4542	4577	4621	4618	4646	4825	4619.7	236	149	134	200	174	212	166	191	145	148	175.5
688	4627	4453	4674	4679	4562	4595	4631	4637	4661	4840	4635.9	239	149	135	202	174	213	166	192	146	149	176.5
689	4646	4480	4690	4687	4588	4608	4648	4654	4676	4853	4653	240	149	136	202	174	215	169	193	146	150	177.4
690	4656	4502	4712	4709	4606	4627	4669	4669	4686	4875	4671.1	240	149	137	203	176	217	169	194	146	151	178.2
691	4679	4527	4731	4720	4623	4648	4687	4684	4705	4890	4689.4	241	149	139	204	175	216	169	194	147	151	178.5
692	4702	4540	4744	4731	4643	4656	4710	4700	4721	4906	4705.3	243	150	140	205	174	215	169	195	147	151	178.9
693	4715	4554	4761	4754	4659	4676	4727	4719	4737	4924	4722.6	243	150	141	206	174	216	169	195	147	150	179.1
694	4728	4569	4781	4778	4670	4691	4742	4735	4753	4936	4738.3	243	150	143	207	174	217	169	198	147	151	179.9
695	4747	4594	4799	4803	4693	4709	4757	4750	4776	4950	4757.8	243	150	145	208	174	218	169	198	148	151	180.4
696	4767	4619	4808	4828	4711	4722	4782	4759	4801	4966	4776.3	243	151	145	208	175	218	168	198	148	152	180.6
697	4783	4638	4829	4849	4732	4745	4798	4769	4832	4987	4796.2	245	153	146	208	172	218	170	198	149	152	181.1
698	4797	4656	4842	4862	4748	4759	4820	4784	4845	5015	4812.8	245	155	147	208	172	221	172	199	152	152	182.3
699	4815	4677	4867	4882	4766	4775	4838	4800	4864	5034	4831.8	246	156	147	209	172	223	172	199	153	152	182.9
700	4841	4695	4881	4896	4786	4792	4854	4821	4878	5053	4849.7	247	156	148	209	173	223	173	198	154	152	183.3
701	4855	4710	4898	4924	4797	4813	4874	4832	4898	5087	4868.8	247	157	148	209	173	224	174	200	154	152	183.8
702	4878	4728	4923	4946	4811	4831	4902	4853	4906	5096	4887.4	247	157	148	209	175	224	175	203	155	153	184.6
703	4901	4744	4941	4970	4825	4847	4925	4863	4925	5111	4905.2	249	157	149	209	175	224	176	204	157	153	185.3
704	4908	4758	4953	4986	4858	4865	4939	4876	4942	5126	4921.1	249	157	150	209	176	224	176	204	158	153	185.6
705	4922	4774	4963	5007	4879	4880	4959	4896	4957	5143	4938	251	158	151	209	176	224	176	205	158	153	186.1
706	4936	4793	4980	5024	4898	4909	4981	4925	4971	5161	4957.8	253	158	151	211	176	224	176	206	158	153	186.6
707	4958	4808	4988	5037	4915	4924	4997	4944	4990	5178	4973.9	256	159	151	211	176	224	177	207	159	156	187.6
708	4971	4827	5009	5064	4927	4945	5020	4956	5004	5199	4992.2	257	159	153	213	176	224	177	207	157	156	187.9
709	4991	4849	5022	5085	4941	4964	5044	4970	5014	5217	5009.7	257	160	153	214	176	224	177	208	159	156	188.4
710	5012	4867	5040	5098	4960	4986	5062	4997	5030	5236	5028.8	258	160	156	214	176	226	178	208	159	156	189.1
711	5029	4892	5063	5113	4976	4998	5084	5024	5045	5248	5047.2	260	160	160	216	177	227	178	209	159	156	190.2
712	5041	4903	5088	5131	4993	5013	5097	5048	5063	5262	5063.9	260	160	161	217	177	226	178	211	159	157	190.6
713	5064	4916	5101	5145	5008	5030	5113	5070	5079	5280	5080.6	262	160	161	218	178	226	179	211	159	156	191
714	5078	4937	5119	5167	5023	5047	5131	5084	5096	5297	5097.9	264	160	161	219	178	229	179	212	160	157	191.9
715	5094	4953	5140	5183	5040	5062	5144	5098	5117	5319	5115	265	158	162	219	179	230	179	212	160	157	192.1
716	5107	4971	5164	5198	5057	5076	5164	5116	5142	5343	5133.8	265	158	162	219	182	231	179	213	160	158	192.7
717	5122	4992	5188	5223	5084	5094	5182	5131	5156	5362	5153.4	265	159	162	219	183	232	180	213	159	161	193.3
718	5137	5007	5204	5237	5093	5107	5196	5155	5180	5383	5169.9	267	160	165	220	183	233	180	214	159	162	194.3
719	5156	5024	5220	5259	5116	5120	5213	5180	5202	5401	5189.1	267	160	165	220	184	233	182	217	159	162	194.9
720	5172	5042	5239	5289	5132	5141	5227	5192	5224	5413	5207.1	270	160	165	220	185	233	182	216	159	163	195.3
721	5184	5059	5260	5307	5152	5157	5251	5202	5251	5432	5225.5	270	160	166	221	187	234	182	217	160	163	196
722	5203	5067	5278	5326	5168	5172	5283	5225	5267	5468	5245.7	270	160	166	221	187	235	186	217	160	163	196.5
723	5219	5076	5310	5344	5194	5194	5291	5241	5279	5489	5263.7	270	159	167	222	187	235	187	217	160	165	196.9
724	5236	5088	5326	5358	5219	5212	5314	5263	5302	5507	5282.5	271	160	169	223	187	235	188	217	161	166	197.7
725	5259	5108	5347	5376	5245	5233	5329	5280	5327	5525	5302.9	273	159	170	224	187	235	188	217	161	166	198
726	5278	5126	5366	5394	5269	5245	5347	5304	5343	5552	5322.4	273	160	171	224	188	237	188	218	160	166	198.5
727	5287	5144	5386	5406	5296	5270	5369	5326	5370	5574	5342.8	274	160	170	226	190	238	188	218	160	166	199
728	5309	5164	5401	5422	5311	5295	5387	5341	5385	5596	5361.1	277	160	171	226	190	239	188	220	162	166	199.9
729	5326	5191	5417	5448	5334	5312	5408	5352	5404	5623	5381.5	278	161	171	226	191	240	188	220	162	166	200.3
730	5336	5209	5434	5470	5350	5344	5423	5376	5421	5650	5401.3	280	161	171	227	190	242	189	219	163	166	200.8
731	5348	5236	5451	5487	5371	5358	5443	5399	5440	5670	5420.3	281	163	173	227	190	242	189	220	163	166	201.4
732	5363	5252	5463	5509	5388	5375	5474	5413	5453	5688	5437.8	281	163	173	228	191	245	189	221	163	167	202.1
733	5393	5270	5482	5525	5402	5390	5491	5435	5474	5703	5456.5	281	163	174	230	193	246	189	221	163	168	202.8
734	5417	5293	5509	5543	5415	5410	5507	5457	5485	5728	5476.4	285	164	174	232	194	246	189	222	165	168	203.9
735	5439	5319	5528	5556	5428	5432	5526	5479	5501	5749	5495.7	285	164	174	232	194	248	189	222	166	169	204.3
736	5457	5339	5551	5580	5459	5456	5550	5492	5521	5760	5516.5	286	164	174	231	194	250	191	223	166	169	204.8
737	5482	5357	5571	5595	5482	5471	5569	5511	5544	5782	5536.4	291	164	172	234	195	250	191	224	166	170	205.7
738	5501	5371	5592	5607	5500	5491	5586	5536	5559	5811	5555.4	291	165	172	235	197	252	191	225	166	173	206.7
739	5527	5389	5617	5623	5519	5513	5607	5551	5579	5833	5575.8	293	165	175	236	199	252	191	225	165	173	207.4
740	5542	5412	5637	5647	5540	5533	5621	5582	5607	5855	5597.6	293	167	176	236	200	254	191	225	166	173	208.1
741	5561	5442	5666	5662	5558	5546	5636	5607	5632	5885	5619.5	294	167	176	236	200	255	191	227	166	175	208.7
742	5574	5464	5689	5677	5574	5557	5665	5636	5649	5912	5639.7	295	167	176	239	201	257	192	227	168	175	209.7
743	5603	5481	5713	5713	5587	5580	5686	5647	5668	5931	5660.9	297	167	176	239	201	257	192	228	168	175	210
744	5626	5500	5736	5733	5604	5597	5703	5664	5699	5954	5681.6	297	167	177	239	203	257	192	229	168	177	210.6
745	5647	5521	5751	5744	5625	5610	5725	5686	5728	5968	5700.5	299	169	177	239	204	257	193	229	170	177	211.4
746	5669	5535	5769	5761	5631	5627	5745	5700	5749	5995	5718.1	300	170	178	239	204	258	193	230	170	178	212
747	5686	5552	5788	5783	5652	5651	5769	5724	5765	6015	5738.5	300	170	178	239	204	260	193	230	170	178	212.2
748	5706	5564	5802	5808	5673	5663	5787	5750	5784	6032	5756.9	300	170	178	240	204	261	193	231	172	180	212.9
749	5723	5583	5820	5833	5699	5690	5810	5769	5805	6052	5778.4	302	172	180	240	204	261	194	232	173	180	213.8
750	5738	5601	5841	5852	5719	5720	5834	5794	5818	6076	5799.3	303	173	182	243	206	261	194	234	173	181	215
751	5762	5622	5873	5867	5738	5732	5850	5808	5844	6091	5818.7	303	174	184	245	206	262	194	234	175	181	215.8
752	5786	5642	5894	5883	5755	5744	5872	5824	5865	6112	5837.7	302	175	184	245	207	264	197	235	176	182	216.7
753	5810	5657	5907	5901	5787	5768	5883	5844	5882	6138	5857.7	303	175	185	246	209	264	197	235	176	182	217.2
754	5831	5680	5926	5925	5809	5784	5909	5869	5901	6164	5879.8	305	175	185	246	211	267	197	235	177	185	218.3
755	5857	5702	5944	5949	5833	5797	5926	5886	5922	6187	5900.3	305	176	186	248	212	267	197	236	177	185	218.9
756	5878	5722	5969	5970	5855	5815	5955	5909	5944	6207	5922.4	305	177	186	249	213	268	197	237	179	186	219.7
757	5901	5746	5994	5995	5878	5840	5968	5934	5964	6234	5945.4	304	178	186	249	213	268	199	237	178	187	219.9
758	5919	5772	6013	6013	5900	5862	5999	5967	5986	6253	5968.4	305	179	186	250	214	269	199	237	178	187	220.4
759	5948	5788	6042	6036	5920	5891	6015	5987	6011	6290	5992.8	308	180	187	252	214	269	201	237	181	189	221.8
760	5969	5806	6058	6063	5943	5914	6035	6001	6025	6310	6012.4	308	181	187	253	214	271	202	237	182	188	222.3
761	5993	5831	6082	6090	5960	5927	6053	6024	6041	6327	6032.8	310	181	187	253	213	271	204	240	182	190	223.1
762	6011	5853	6103	6103	5984	5940	6068	6050	6064	6354	6053	314	181	187	253	214	272	205	241	183	190	224
763	6035	5867	6123	6130	6005	5958	6094	6068	6091	6370	6074.1	315	182	187	253	215	272	206	244	182	190	224.6
764	6052	5898	6149	6146	6023	5986	6115	6091	6114	6398	6097.2	316	183	187	253	217	273	206	244	183	190	225.2
765	6071	5927	6166	6174	6049	6009	6138	6119	6132	6420	6120.5	319	185	189	255	223	273	208	244	183	189	226.8
766	6088	5959	6186	6184	6069	6025	6167	6144	6153	6439	6141.4	321	187	189	255	223	274	209	246	183	190	227.7
767	6111	5967	6203	6208	6094	6044	6189	6169	6171	6461	6161.7	321	188	189	257	223	276	209	246	184	191	228.4
768	6140	5983	6222	6244	6114	6070	6217	6185	6193	6478	6184.6	324	187	190	260	223	276	212	246	184	191	229.3
769	6155	5999	6239	6266	6137	6090	6240	6201	6214	6493	6203.4	325	187	190	260	223	276	212	246	184	191	229.4
770	6184	6027	6269	6289	6151	6108	6258	6218	6240	6519	6226.3	329	189	191	262	223	277	214	248	184	191	230.8
771	6205	6047	6294	6313	6168	6129	6269	6245	6270	6537	6247.7	330	190	191	264	223	278	215	248	184	191	231.4
772	6229	6065	6303	6337	6196	6155	6286	6269	6296	6561	6269.7	330	192	192	266	224	278	217	248	185	192	232.4
773	6255	6081	6334	6355	6223	6166	6310	6300	6321	6580	6292.5	331	193	192	266	225	280	219	248	186	192	233.2
774	6278	6096	6364	6373	6249	6189	6333	6326	6339	6609	6315.6	333	194	192	267	224	280	219	251	186	192	233.8
775	6308	6113	6393	6406	6275	6216	6348	6357	6362	6636	6341.4	333	195	194	271	224	280	219	251	186	194	234.7
776	6331	6131	6421	6427	6301	6244	6372	6385	6389	6659	6366	335	195	194	270	224	284	219	252	186	195	235.4
777	6353	6148	6440	6448	6324	6266	6390	6409	6412	6682	6387.2	335	198	193	271	226	283	219	253	186	195	235.9
778	6373	6175	6465	6488	6349	6286	6415	6427	6435	6706	6411.9	336	200	193	273	228	283	221	253	186	196	236.9
779	6394	6206	6487	6508	6372	6313	6431	6449	6456	6734	6435	338	201	194	274	229	283	223	254	187	196	237.9
780	6414	6233	6515	6531	6405	6321	6453	6464	6477	6751	6456.4	339	202	194	275	231	283	223	254	188	196	238.5
781	6437	6261	6543	6549	6433	6349	6482	6478	6497	6782	6481.1	339	202	194	277	232	283	223	257	188	198	239.3
782	6458	6282	6574	6566	6463	6366	6503	6514	6521	6818	6506.5	340	203	194	279	233	285	224	257	190	198	240.3
783	6478	6301	6598	6593	6487	6387	6516	6543	6539	6850	6529.2	341	203	194	280	237	287	225	258	190	201	241.6
784	6508	6322	6629	6617	6519	6414	6541	6573	6565	6880	6556.8	343	204	194	281	237	288	225	258	191	203	242.4
785	6526	6349	6656	6638	6542	6431	6566	6592	6585	6904	6578.9	346	204	194	283	237	287	225	258	191	203	242.8
786	6547	6374	6685	6669	6565	6457	6590	6608	6613	6933	6604.1	347	206	194	283	237	290	225	258	192	204	243.6
787	6574	6399	6715	6700	6581	6491	6619	6633	6641	6955	6630.8	347	205	194	284	236	290	225	259	192	204	243.6
788	6602	6420	6742	6730	6606	6512	6639	6669	6672	6980	6657.2	348	206	195	287	240	291	225	259	191	205	244.7
789	6624	6450	6772	6759	6628	6534	6661	6696	6707	7017	6684.8	349	206	196	289	241	293	227	262	193	205	246.1
790	6647	6474	6797	6788	6649	6555	6680	6726	6724	7043	6708.3	351	208	198	291	241	294	226	263	194	207	247.3
791	6675	6498	6822	6810	6683	6582	6701	6753	6750	7066	6734	350	207	198	292	242	297	228	263	194	208	247.9
792	6694	6530	6856	6830	6710	6602	6729	6780	6781	7096	6760.8	350	207	198	293	242	298	228	263	196	208	248.3
793	6723	6565	6892	6854	6739	6629	6750	6804	6807	7119	6788.2	351	208	198	295	242	298	229	264	195	208	248.8
794	6745	6601	6918	6886	6766	6659	6777	6829	6825	7141	6814.7	351	208	199	297	243	297	230	265	195	208	249.3
795	6770	6626	6935	6923	6794	6680	6816	6855	6843	7165	6840.7	353	208	199	297	245	297	232	267	197	209	250.4
796	6796	6653	6955	6949	6819	6702	6832	6896	6875	7202	6867.9	356	207	200	301	246	300	233	267	196	210	251.6
797	6823	6667	6973	6972	6843	6724	6863	6928	6913	7225	6893.1	357	206	202	301	249	301	235	268	197	210	252.6
798	6852	6690	6992	7001	6864	6747	6880	6948	6942	7249	6916.5	358	209	204	303	249	301	235	268	197	210	253.4
799	6883	6709	7024	7024	6896	6775	6907	6979	6966	7280	6944.3	358	209	204	304	249	302	236	270	197	212	254.1
800	6907	6727	7049	7049	6922	6799	6933	7016	6992	7297	6969.1	360	210	204	304	251	300	236	270	201	215	255.1
801	6929	6762	7078	7077	6948	6825	6965	7044	7023	7321	6997.2	362	212	205	304	251	300	237	273	201	216	256.1
802	6946	6780	7098	7103	6980	6856	6986	7067	7050	7343	7020.9	362	214	205	305	251	301	238	273	203	219	257.1
803	6965	6803	7123	7133	7004	6877	7011	7103	7068	7367	7045.4	367	215	205	307	252	303	238	276	202	223	258.8
804	6981	6828	7149	7165	7046	6901	7037	7130	7101	7383	7072.1	371	217	205	307	252	304	239	278	202	223	259.8
805	7010	6850	7174	7192	7070	6934	7056	7157	7124	7406	7097.3	373	216	206	307	253	306	241	278	203	223	260.6
806	7043	6875	7203	7217	7086	6955	7082	7188	7160	7440	7124.9	373	216	206	308	253	307	241	279	203	224	261
807	7074	6900	7232	7247	7112	6970	7118	7211	7188	7469	7152.1	374	217	206	309	254	306	242	284	205	225	262.2
808	7105	6929	7256	7268	7136	6990	7138	7234	7208	7495	7175.9	377	218	207	310	255	308	242	285	205	228	263.5
809	7138	6950	7266	7296	7156	7023	7163	7256	7230	7520	7199.8	377	219	207	310	257	310	242	285	205	229	264.1
810	7170	6976	7292	7329	7188	7046	7191	7287	7258	7554	7229.1	377	220	207	312	258	312	242	286	205	230	264.9
811	7186	6991	7319	7358	7212	7073	7215	7317	7287	7581	7253.9	379	219	207	312	259	313	242	286	204	230	265.1
812	7215	7028	7347	7385	7238	7100	7245	7343	7322	7612	7283.5	381	221	208	316	259	315	245	286	204	230	266.5
813	7248	7061	7381	7408	7262	7128	7276	7376	7350	7646	7313.6	384	221	210	317	263	318	245	286	206	231	268.1
814	7281	7095	7414	7434	7302	7161	7307	7397	7383	7672	7344.6	387	222	211	321	263	321	247	289	206	232	269.9
815	7314	7123	7438	7465	7331	7193	7332	7414	7416	7699	7372.5	388	222	213	325	265	322	248	290	208	233	271.4
816	7340	7150	7464	7483	7344	7218	7368	7451	7444	7724	7398.6	390	223	214	329	269	324	249	291	208	236	273.3
817	7363	7179	7483	7503	7368	7257	7388	7479	7472	7754	7424.6	392	225	214	329	269	324	251	293	207	237	274.1
818	7402	7209	7509	7526	7396	7285	7423	7512	7501	7777	7454	392	226	217	328	271	324	254	293	207	238	275
819	7432	7232	7532	7573	7427	7313	7459	7535	7528	7809	7484	392	227	217	329	272	325	256	293	207	238	275.6
820	7452	7253	7561	7594	7465	7349	7480	7568	7554	7845	7512.1	393	227	219	329	273	326	257	293	207	240	276.4
821	7493	7276	7593	7617	7494	7375	7512	7584	7587	7870	7540.1	395	227	219	328	273	329	259	296	209	241	277.6
822	7522	7311	7626	7632	7522	7405	7537	7612	7614	7894	7567.5	396	229	220	331	276	330	260	298	211	242	279.3
823	7544	7338	7660	7673	7537	7438	7569	7638	7641	7925	7596.3	398	229	221	332	277	331	263	298	212	242	280.3
824	7566	7365	7693	7694	7566	7467	7600	7662	7669	7956	7623.8	399	229	221	332	279	331	264	298	213	244	281
825	7586	7396	7717	7722	7596	7503	7629	7690	7696	7992	7652.7	402	230	221	335	279	331	265	299	214	245	282.1
826	7619	7427	7746	7751	7621	7524	7670	7712	7722	8027	7681.9	404	231	221	336	279	331	265	303	215	245	283
827	7651	7456	7782	7785	7651	7559	7690	7740	7745	8056	7711.5	405	232	222	337	281	332	268	304	216	247	284.4
828	7672	7483	7812	7813	7688	7587	7725	7766	7777	8085	7740.8	406	234	222	336	281	333	268	304	217	247	284.8
829	7701	7514	7849	7840	7712	7617	7749	7790	7816	8121	7770.9	406	234	223	338	281	333	269	304	218	247	285.3
830	7728	7543	7874	7854	7738	7646	7783	7816	7849	8143	7797.4	408	234	223	341	282	335	273	306	220	249	287.1
831	7758	7558	7897	7886	7766	7676	7817	7842	7882	8175	7825.7	409	234	223	342	283	339	274	306	221	250	288.1
832	7790	7583	7934	7905	7805	7703	7839	7876	7909	8207	7855.1	410	235	222	342	283	339	275	306	222	249	288.3
833	7824	7619	7958	7935	7827	7736	7863	7914	7936	8240	7885.2	411	236	225	344	283	339	276	307	222	250	289.3
834	7852	7652	7987	7956	7858	7761	7892	7948	7970	8276	7915.2	411	236	225	346	283	340	276	310	223	251	290.1
835	7881	7680	8017	7983	7883	7788	7919	7972	7990	8312	7942.5	412	237	225	345	283	340	276	311	223	253	290.5
836	7914	7707	8050	8013	7903	7815	7943	8002	8016	8343	7970.6	413	236	227	345	283	342	276	315	223	254	291.4
837	7934	7738	8081	8039	7937	7840	7968	8032	8059	8385	8001.3	416	237	228	345	284	342	280	316	223	255	292.6
838	7968	7767	8100	8067	7961	7874	8000	8061	8087	8419	8030.4	420	236	228	346	285	343	282	318	224	256	293.8
839	8003	7801	8140	8104	7984	7911	8023	8085	8121	8448	8062	420	236	229	344	288	344	284	320	226	258	294.9
840	8036	7826	8178	8132	8009	7945	8051	8117	8147	8474	8091.5	420	236	230	344	290	344	284	319	226	259	295.2
841	8070	7854	8209	8159	8035	7985	8083	8144	8174	8494	8120.7	424	236	230	342	291	344	285	318	226	256	295.2
842	8108	7887	8244	8199	8064	8016	8114	8179	8208	8520	8153.9	424	237	229	342	294	346	285	319	227	259	296.2
843	8138	7918	8280	8234	8094	8056	8144	8209	8241	8551	8186.5	424	238	229	342	296	348	285	319	230	259	297
844	8166	7952	8306	8265	8121	8096	8172	8238	8260	8581	8215.7	424	238	229	343	296	350	286	321	229	259	297.5
845	8197	7990	8338	8297	8165	8126	8203	8263	8307	8618	8250.4	424	238	233	343	296	352	286	322	229	260	298.3
846	8236	8019	8360	8330	8185	8165	8243	8288	8337	8655	8281.8	425	238	236	343	298	353	286	325	229	259	299.2
847	8272	8045	8389	8363	8217	8196	8281	8322	8366	8685	8313.6	427	239	238	344	299	353	291	326	229	259	300.5
848	8291	8065	8414	8395	8247	8217	8299	8362	8400	8720	8341	429	240	239	347	300	354	291	327	230	259	301.6
849	8315	8094	8446	8431	8283	8252	8337	8391	8440	8762	8375.1	431	240	241	348	301	356	291	329	231	259	302.7
850	8345	8120	8477	8465	8316	8281	8381	8428	8468	8792	8407.3	433	241	242	348	301	356	292	331	233	259	303.6
851	8378	8151	8516	8493	8351	8313	8410	8450	8493	8831	8438.6	433	241	244	349	301	358	294	331	235	258	304.4
852	8400	8184	8556	8538	8375	8349	8450	8482	8517	8866	8471.7	434	241	245	352	303	360	294	333	237	260	305.9
853	8431	8216	8585	8568	8411	8386	8493	8508	8539	8898	8503.5	436	242	246	354	303	360	296	334	237	263	307.1
854	8460	8255	8616	8605	8438	8416	8533	8534	8567	8929	8535.3	436	243	246	353	303	361	296	335	239	264	307.6
855	8499	8285	8652	8645	8468	8441	8571	8565	8601	8973	8570	436	243	250	353	305	363	297	336	242	265	309
856	8523	8311	8683	8685	8496	8472	8589	8589	8625	9010	8598.3	438	243	250	355	305	364	298	336	244	266	309.9
857	8560	8352	8727	8722	8528	8503	8609	8619	8665	9037	8632.2	440	244	251	358	305	364	299	338	245	267	311.1
858	8595	8385	8774	8748	8558	8540	8643	8654	8702	9068	8666.7	440	246	251	359	307	365	299	338	249	268	312.2
859	8634	8409	8808	8780	8589	8577	8676	8676	8735	9104	8698.8	442	247	251	359	307	369	300	339	251	268	313.3
860	8660	8433	8840	8816	8614	8621	8717	8704	8762	9139	8730.6	445	249	254	362	308	369	301	339	250	270	314.7
861	8706	8467	8867	8845	8645	8663	8739	8741	8793	9159	8762.5	447	252	255	363	308	369	302	341	249	270	315.6
862	8734	8494	8901	8880	8678	8695	8779	8770	8828	9190	8794.9	448	252	256	363	307	369	302	341	249	270	315.7
863	8773	8519	8946	8917	8704	8714	8817	8803	8863	9225	8828.1	454	255	258	363	308	371	303	341	249	273	317.5
864	8812	8560	8973	8947	8742	8751	8852	8830	8891	9260	8861.8	455	257	260	363	310	371	303	343	249	274	318.5
865	8844	8589	9000	8975	8769	8771	8896	8867	8925	9299	8893.5	458	257	260	365	310	372	305	344	248	274	319.3
866	8877	8616	9033	9009	8796	8790	8921	8895	8961	9325	8922.3	461	258	262	369	310	374	306	344	249	276	320.9
867	8903	8644	9067	9048	8830	8817	8941	8923	9002	9357	8953.2	464	260	265	371	312	377	305	344	251	277	322.6
868	8942	8678	9101	9100	8860	8845	8971	8955	9031	9390	8987.3	467	261	267	371	313	377	307	345	251	277	323.6
869	8971	8707	9129	9134	8906	8879	9013	8991	9052	9423	9020.5	467	262	269	372	314	379	308	346	252	278	324.7
870	9009	8747	9159	9168	8931	8912	9045	9019	9085	9446	9052.1	470	262	269	374	317	382	309	348	252	279	326.2
871	9050	8777	9203	9192	8956	8942	9076	9056	9108	9478	9083.8	470	262	270	376	319	385	313	349	252	280	327.6
872	9084	8812	9229	9224	8992	8976	9106	9091	9139	9515	9116.8	474	265	272	378	320	385	313	350	253	279	328.9
873	9131	8838	9259	9257	9020	9005	9149	9123	9183	9545	9151	474	265	272	377	321	385	313	351	252	280	329
874	9171	8869	9293	9293	9048	9043	9189	9154	9218	9584	9186.2	477	267	274	379	321	386	313	351	253	280	330.1
875	9206	8892	9333	9325	9081	9066	9220	9190	9257	9628	9219.8	479	268	275	378	321	388	314	351	252	281	330.7
876	9241	8919	9370	9358	9114	9097	9254	9231	9285	9668	9253.7	483	269	279	378	320	389	318	353	252	282	332.3
877	9275	8951	9401	9380	9146	9128	9289	9257	9322	9701	9285	487	269	280	382	319	391	318	354	252	285	333.7
878	9308	8989	9437	9406	9175	9169	9336	9298	9357	9739	9321.4	489	270	280	382	319	391	318	354	252	285	334
879	9340	9017	9465	9451	9202	9192	9373	9329	9385	9780	9353.4	492	271	280	384	320	390	319	356	253	286	335.1
880	9367	9038	9495	9483	9240	9223	9398	9372	9426	9805	9384.7	494	271	281	387	321	391	321	360	253	288	336.7
881	9399	9083	9534	9520	9275	9263	9443	9395	9461	9851	9422.4	496	271	282	387	321	393	323	360	256	289	337.8
882	9438	9123	9579	9551	9309	9301	9485	9425	9498	9881	9459	497	273	281	389	322	394	326	360	255	289	338.6
883	9472	9152	9605	9579	9335	9336	9514	9458	9534	9918	9490.3	499	273	281	391	324	394	327	362	257	289	339.7
884	9502	9192	9633	9604	9368	9368	9537	9492	9575	9962	9523.3	499	273	283	392	325	395	328	363	258	288	340.4
885	9525	9220	9673	9639	9397	9405	9577	9530	9607	10004	9557.7	500	274	283	393	325	397	329	365	259	288	341.3
886	9563	9246	9711	9664	9427	9439	9612	9573	9637	10036	9590.8	502	277	285	392	325	399	330	366	260	288	342.4
887	9608	9301	9739	9701	9457	9489	9634	9606	9677	10071	9628.3	505	276	287	393	325	401	330	370	261	287	343.5
888	9655	9342	9774	9727	9496	9522	9675	9640	9728	10110	9666.9	505	278	287	395	326	401	330	373	261	288	344.4
889	9682	9369	9806	9760	9525	9556	9711	9685	9756	10141	9699.1	508	279	286	396	326	403	332	374	263	288	345.5
890	9710	9409	9843	9797	9554	9587	9744	9711	9792	10175	9732.2	508	282	287	397	327	402	335	378	267	289	347.2
891	9737	9452	9886	9827	9591	9624	9788	9747	9829	10201	9768.2	510	284	287	398	328	404	335	380	269	289	348.4
892	9766	9477	9917	9868	9625	9655	9826	9783	9864	10238	9801.9	511	284	287	399	329	405	334	381	271	288	348.9
893	9795	9518	9951	9910	9662	9682	9862	9818	9903	10268	9836.9	513	285	287	399	329	406	335	382	272	288	349.6
894	9821	9546	9978	9949	9691	9710	9895	9848	9937	10299	9867.4	513	285	288	400	332	407	335	383	272	290	350.5
895	9851	9587	10020	9989	9741	9752	9939	9875	9974	10345	9907.3	517	285	290	402	332	409	336	384	273	290	351.8
896	9877	9625	10061	10020	9779	9786	9973	9914	10005	10378	9941.8	520	285	292	403	334	412	337	386	273	291	353.3
897	9917	9665	10101	10061	9810	9827	10009	9955	10035	10421	9980.1	521	284	293	405	335	414	337	388	273	291	354.1
898	9956	9701	10129	10090	9846	9864	10056	9983	10083	10462	10017	522	285	295	406	336	414	339	389	274	292	355.2
899	9998	9736	10152	10126	9881	9908	10103	10022	10113	10507	10054.6	525	286	297	405	339	416	340	391	276	297	357.2
900	10022	9772	10181	10170	9921	9943	10137	10060	10149	10549	10090.4	527	286	299	406	340	416	342	392	276	298	358.2
901	10049	9804	10229	10203	9960	9980	10175	10108	10194	10587	10128.9	527	286	299	409	340	420	343	396	276	299	359.5
902	10089	9835	10265	10240	9991	10013	10197	10149	10220	10630	10162.9	529	286	298	409	342	421	343	398	279	300	360.5
903	10116	9866	10304	10273	10028	10051	10241	10198	10246	10673	10199.6	533	286	301	409	344	423	344	399	281	302	362.2
904	10140	9895	10348	10303	10055	10083	10283	10237	10277	10710	10233.1	537	287	303	411	344	424	343	401	281	302	363.3
905	10176	9927	10391	10335	10102	10109	10321	10277	10313	10748	10269.9	539	287	303	414	347	425	345	403	281	303	364.7
906	10196	9961	10430	10367	10130	10129	10357	10316	10347	10784	10301.7	541	287	307	413	347	428	347	404	282	304	366
907	10243	9990	10472	10401	10166	10170	10407	10364	10387	10838	10343.8	546	290	307	414	349	430	348	407	283	304	367.8
908	10288	10018	10507	10444	10198	10201	10451	10396	10421	10875	10379.9	547	291	307	416	350	431	349	407	285	304	368.7
909	10309	10049	10552	10473	10234	10238	10484	10427	10460	10908	10413.4	547	292	307	416	350	433	351	408	286	304	369.4
910	10350	10083	10591	10508	10280	10278	10521	10459	10493	10955	10451.8	548	294	310	417	352	438	352	410	287	305	371.3
911	10385	10123	10633	10557	10296	10318	10575	10499	10522	10998	10490.6	551	295	312	420	351	442	352	411	287	305	372.6
912	10429	10157	10679	10587	10336	10353	10608	10522	10564	11040	10527.5	557	295	312	422	353	442	353	412	288	305	373.9
913	10472	10183	10710	10625	10376	10379	10648	10571	10592	11094	10565	559	295	312	422	354	442	354	414	290	306	374.8
914	10516	10223	10754	10655	10409	10406	10690	10614	10625	11132	10602.4	560	296	313	423	356	442	358	413	290	308	375.9
915	10545	10258	10787	10689	10452	10434	10728	10647	10668	11175	10638.3	560	296	314	424	357	443	359	415	289	309	376.6
916	10587	10299	10828	10727	10489	10458	10776	10687	10707	11205	10676.3	562	296	316	425	357	445	364	416	290	310	378.1
917	10628	10347	10869	10786	10528	10496	10809	10726	10754	11242	10718.5	566	295	317	424	358	447	364	418	291	310	379
918	10665	10383	10912	10821	10566	10523	10843	10759	10796	11285	10755.3	567	297	319	424	360	447	364	420	292	311	380.1
919	10713	10414	10955	10872	10605	10556	10892	10799	10831	11323	10796	573	299	321	426	361	453	366	421	294	315	382.9
920	10756	10455	11007	10906	10648	10593	10928	10835	10865	11376	10836.9	575	299	323	428	361	455	366	422	294	315	383.8
921	10788	10499	11042	10938	10696	10634	10965	10874	10896	11418	10875	576	302	323	430	362	456	366	423	295	316	384.9
922	10825	10536	11077	10969	10736	10676	11008	10917	10933	11458	10913.5	580	301	324	433	363	456	369	425	295	316	386.2
923	10872	10562	11113	11004	10763	10711	11032	10957	10977	11498	10948.9	582	302	324	435	365	456	371	425	296	318	387.4
924	10919	10598	11150	11046	10813	10738	11082	10988	11009	11547	10989	586	302	324	436	364	458	372	428	295	318	388.3
925	10961	10643	11185	11084	10841	10772	11123	11034	11047	11598	11028.8	588	302	325	438	366	458	373	429	295	321	389.5
926	10998	10685	11226	11132	10874	10805	11160	11069	11090	11638	11067.7	589	304	326	441	366	459	374	430	295	321	390.5
927	11036	10715	11256	11172	10905	10859	11202	11103	11136	11693	11107.7	593	304	326	444	367	459	378	429	295	322	391.7
928	11078	10758	11298	11215	10961	10893	11239	11144	11188	11737	11151.1	597	304	327	446	369	462	380	429	296	324	393.4
929	11120	10800	11336	11265	10994	10930	11286	11192	11229	11778	11193	599	305	327	447	370	461	381	429	297	324	394
930	11169	10830	11374	11301	11036	10967	11326	11233	11274	11818	11232.8	601	306	327	448	370	462	381	429	299	324	394.7
931	11214	10861	11415	11342	11073	11003	11363	11275	11328	11850	11272.4	603	306	328	451	371	462	381	431	300	328	396.1
932	11248	10897	11465	11388	11116	11061	11394	11307	11373	11894	11314.3	607	306	328	452	373	464	383	433	302	331	397.9
933	11303	10934	11508	11435	11167	11101	11425	11361	11429	11937	11360	609	307	331	451	375	469	386	435	305	333	400.1
934	11335	10965	11558	11488	11200	11144	11469	11420	11451	11989	11401.9	611	310	331	450	378	470	387	437	307	334	401.5
935	11373	11002	11595	11542	11258	11186	11505	11461	11493	12042	11445.7	615	312	333	450	380	472	387	437	307	334	402.7
936	11427	11035	11641	11580	11295	11221	11549	11498	11539	12092	11487.7	617	312	333	450	382	475	388	439	308	335	403.9
937	11460	11078	11686	11627	11346	11262	11586	11557	11580	12135	11531.7	618	313	334	451	385	477	388	440	308	337	405.1
938	11507	11119	11736	11673	11395	11309	11620	11598	11619	12171	11574.7	622	315	336	451	388	478	388	442	311	338	406.9
939	11551	11164	11776	11723	11438	11352	11659	11642	11666	12215	11618.6	626	320	338	456	394	478	390	440	311	339	409.2
940	11592	11215	11814	11758	11495	11392	11698	11698	11703	12254	11661.9	627	322	339	456	401	481	394	444	312	339	411.5
941	11643	11263	11859	11794	11540	11432	11736	11747	11751	12298	11706.3	629	325	341	460	402	481	397	444	314	339	413.2
942	11694	11312	11912	11840	11591	11491	11777	11781	11798	12347	11754.3	633	326	341	461	402	483	399	444	315	339	414.3
943	11739	11358	11960	11894	11639	11520	11806	11825	11836	12384	11796.1	635	327	343	466	405	487	399	446	315	340	416.3
944	11782	11404	12001	11949	11680	11569	11847	11861	11890	12437	11842	638	328	344	465	408	486	399	446	317	342	417.3
945	11826	11460	12031	11992	11742	11611	11886	11919	11934	12486	11888.7	640	329	344	469	409	488	398	448	320	344	418.9
946	11873	11501	12078	12046	11784	11649	11923	11968	11974	12534	11933	642	330	345	473	409	489	399	448	320	344	419.9
947	11918	11554	12111	12079	11832	11690	11968	12002	12020	12593	11976.7	647	330	346	477	412	489	399	449	321	343	421.3
948	11963	11608	12151	12123	11878	11726	12008	12051	12075	12628	12021.1	650	331	345	478	413	491	399	450	323	346	422.6
949	11999	11652	12200	12167	11922	11768	12053	12096	12119	12675	12065.1	652	334	346	482	415	492	399	451	322	349	424.2
950	12056	11702	12249	12210	11969	11808	12106	12141	12152	12736	12112.9	656	334	346	482	416	492	401	452	323	350	425.2
951	12097	11760	12306	12263	12006	11860	12154	12183	12193	12777	12159.9	657	335	346	485	419	494	401	453	324	351	426.5
952	12142	11806	12346	12312	12051	11903	12192	12222	12249	12818	12204.1	661	335	348	485	419	496	401	453	326	351	427.5
953	12181	11840	12397	12371	12095	11953	12239	12267	12288	12858	12248.9	662	339	348	486	424	497	403	453	327	352	429.1
954	12217	11883	12443	12420	12132	12001	12285	12314	12327	12911	12293.3	664	340	350	491	426	498	404	454	329	353	430.9
955	12270	11916	12506	12462	12186	12041	12329	12362	12366	12969	12340.7	664	341	353	492	427	502	404	455	330	354	432.2
956	12325	11954	12550	12509	12237	12086	12376	12412	12415	13021	12388.5	667	343	355	491	427	506	405	456	330	355	433.5
957	12375	11989	12613	12566	12287	12140	12430	12461	12464	13063	12438.8	667	343	354	491	426	507	407	457	331	356	433.9
958	12438	12043	12653	12618	12333	12189	12476	12508	12517	13103	12487.8	667	344	355	496	428	510	408	458	331	360	435.7
959	12480	12082	12687	12658	12369	12239	12529	12552	12561	13150	12530.7	670	347	356	498	429	513	408	458	331	360	437
960	12535	12129	12728	12704	12414	12283	12583	12595	12601	13192	12576.4	678	348	356	499	430	515	410	458	331	363	438.8
961	12584	12177	12773	12751	12457	12333	12637	12646	12649	13241	12624.8	678	350	358	499	430	516	410	459	332	364	439.6
962	12633	12227	12807	12806	12505	12384	12687	12683	12696	13308	12673.6	680	350	357	498	429	518	410	461	333	364	440
963	12677	12283	12848	12850	12558	12428	12735	12738	12741	13358	12721.6	682	350	357	504	430	521	413	463	334	364	441.8
964	12711	12324	12904	12891	12600	12465	12789	12792	12802	13410	12768.8	683	351	355	507	430	523	414	464	334	367	442.8
965	12756	12358	12948	12935	12647	12514	12842	12840	12834	13452	12812.6	685	353	354	510	435	525	414	464	341	369	445
966	12799	12407	12988	13001	12692	12563	12889	12898	12884	13496	12861.7	686	356	354	512	437	529	418	465	341	370	446.8
967	12839	12449	13041	13048	12741	12619	12935	12940	12935	13564	12911.1	692	356	354	512	441	531	421	466	342	374	448.9
968	12883	12490	13102	13102	12789	12672	12971	12988	12983	13613	12959.3	693	356	355	515	445	534	422	468	343	376	450.7
969	12922	12528	13151	13148	12839	12722	13018	13036	13046	13675	13008.5	697	357	356	517	445	538	422	469	345	378	452.4
970	12963	12580	13194	13205	12888	12762	13067	13093	13098	13730	13058	700	358	358	515	446	544	422	467	345	379	453.4
971	13005	12631	13243	13255	12936	12821	13112	13143	13146	13795	13108.7	702	358	358	519	446	547	422	471	348	381	455.2
972	13056	12681	13289	13296	12980	12887	13162	13189	13195	13857	13159.2	707	359	357	518	449	548	424	473	350	385	457
973	13109	12735	13334	13348	13029	12926	13209	13245	13245	13907	13208.7	708	359	359	519	449	550	425	471	351	387	457.8
974	13151	12801	13376	13387	13073	12985	13250	13314	13291	13956	13258.4	710	362	361	519	451	555	426	475	350	387	459.6
975	13207	12841	13421	13438	13125	13040	13303	13364	13348	13993	13308	713	365	361	518	453	555	427	475	352	388	460.7
976	13254	12886	13472	13485	13165	13075	13346	13419	13405	14046	13355.3	717	366	363	519	455	558	427	477	354	391	462.7
977	13301	12946	13510	13529	13223	13132	13391	13458	13459	14099	13404.8	722	366	364	522	456	560	429	479	355	395	464.8
978	13372	12997	13544	13590	13281	13186	13452	13502	13501	14146	13457.1	722	368	364	522	456	560	435	479	355	395	465.6
979	13415	13053	13608	13634	13332	13223	13495	13566	13563	14197	13508.6	724	369	367	523	457	564	435	480	354	395	466.8
980	13454	13102	13664	13677	13381	13275	13559	13610	13608	14248	13557.8	728	371	368	525	457	564	437	481	357	396	468.4
981	13495	13152	13717	13719	13433	13322	13612	13666	13662	14302	13608	735	372	369	526	458	564	440	484	358	397	470.3
982	13538	13228	13761	13772	13489	13364	13664	13713	13700	14348	13657.7	735	374	369	531	461	567	443	484	360	398	472.2
983	13592	13280	13804	13813	13555	13418	13716	13749	13753	14387	13706.7	738	375	369	538	465	572	444	486	362	398	474.7
984	13650	13316	13861	13866	13604	13469	13753	13807	13797	14448	13757.1	740	375	369	537	466	570	444	486	363	400	475
985	13703	13361	13924	13910	13660	13518	13797	13852	13850	14511	13808.6	741	376	371	537	467	573	444	486	365	401	476.1
986	13755	13412	13979	13968	13708	13575	13843	13902	13903	14566	13861.1	745	378	370	538	470	574	444	488	366	400	477.3
987	13814	13463	14036	14017	13753	13623	13884	13942	13956	14612	13910	746	381	372	539	475	575	444	491	367	400	479
988	13861	13498	14078	14089	13806	13677	13934	14010	14009	14671	13963.3	749	382	373	542	479	578	447	491	369	399	480.9
989	13915	13550	14124	14137	13853	13740	13979	14062	14064	14732	14015.6	753	388	374	542	481	580	448	494	370	401	483.1
990	13975	13607	14205	14198	13907	13786	14022	14109	14108	14780	14069.7	756	389	374	544	482	581	449	497	372	402	484.6
991	14040	13657	14271	14249	13974	13829	14070	14153	14149	14829	14122.1	758	393	375	548	484	585	452	502	374	406	487.7
992	14082	13710	14318	14294	14028	13875	14115	14203	14207	14890	14172.2	760	395	376	547	485	587	452	502	374	408	488.6
993	14126	13765	14379	14342	14091	13923	14166	14266	14266	14939	14226.3	761	395	376	548	485	587	455	504	375	410	489.6
994	14167	13820	14425	14391	14144	13971	14216	14319	14314	15016	14278.3	763	396	375	551	487	588	458	508	374	412	491.2
995	14218	13878	14483	14450	14198	14015	14258	14359	14367	15060	14328.6	763	398	376	557	486	589	459	511	374	413	492.6
996	14263	13922	14543	14505	14254	14064	14315	14423	14429	15127	14384.5	765	401	376	556	487	591	461	512	373	417	493.9
997	14328	13975	14594	14556	14327	14124	14385	14468	14473	15167	14439.7	766	401	377	556	490	593	460	515	375	418	495.1
998	14395	14027	14652	14609	14365	14186	14449	14521	14527	15223	14495.4	768	402	379	561	491	594	462	515	376	419	496.7
999	14443	14064	14710	14672	14416	14243	14501	14576	14573	15282	14548	770	406	383	560	494	594	463	517	377	421	498.5
1000	14501	14122	14780	14739	14487	14298	14560	14633	14613	15340	14607.3	773	407	386	562	502	595	463	521	377	424	501
1001	14569	14161	14833	14782	14537	14354	14604	14699	14663	15396	14659.8	774	410	388	569	504	595	463	521	380	424	502.8
1002	14626	14210	14898	14830	14599	14411	14653	14763	14731	15440	14716.1	775	411	391	569	504	595	465	525	384	424	504.3
1003	14675	14268	14953	14875	14652	14459	14697	14808	14771	15490	14764.8	781	415	393	570	505	598	466	528	385	424	506.5
1004	14730	14323	14997	14936	14701	14509	14746	14867	14827	15551	14818.7	782	415	394	570	508	602	469	529	385	427	508.1
1005	14779	14369	15042	15000	14744	14564	14790	14930	14896	15605	14871.9	787	415	392	571	510	606	472	530	385	429	509.7
1006	14844	14412	15098	15051	14793	14636	14854	14981	14951	15659	14927.9	788	418	395	572	510	611	476	534	384	430	511.8
1007	14896	14448	15163	15108	14848	14682	14915	15036	15011	15716	14982.3	791	419	396	573	513	616	480	537	386	432	514.3
1008	14935	14498	15210	15169	14900	14728	14975	15101	15065	15779	15036	791	418	398	576	513	618	480	536	387	434	515.1
1009	15007	14558	15266	15215	14948	14778	15037	15162	15127	15832	15093	792	418	401	578	515	622	485	538	389	436	517.4
1010	15068	14605	15333	15265	14984	14844	15096	15215	15195	15897	15150.2	793	418	401	580	516	622	486	539	392	437	518.4
1011	15123	14656	15386	15315	15043	14896	15150	15270	15235	15973	15204.7	798	420	402	588	517	624	485	541	394	440	520.9
1012	15179	14711	15451	15363	15107	14950	15205	15321	15301	16029	15261.7	802	423	404	591	519	626	486	545	395	440	523.1
1013	15233	14778	15523	15413	15154	15009	15277	15381	15362	16089	15321.9	802	426	406	590	521	627	488	545	396	442	524.3
1014	15286	14826	15586	15466	15209	15062	15322	15436	15428	16132	15375.3	804	427	407	593	523	627	490	545	396	446	525.8
1015	15333	14876	15657	15522	15247	15120	15392	15477	15480	16185	15428.9	804	428	408	594	523	629	491	547	396	448	526.8
1016	15395	14934	15716	15583	15304	15187	15445	15536	15538	16231	15486.9	806	429	411	595	525	632	492	548	397	450	528.5
1017	15447	14986	15790	15642	15365	15241	15505	15588	15579	16295	15543.8	809	430	411	597	525	633	493	552	398	450	529.8
1018	15493	15041	15839	15722	15428	15294	15574	15639	15638	16362	15603	811	433	412	597	527	635	496	553	398	449	531.1
1019	15539	15093	15898	15774	15471	15342	15625	15687	15687	16419	15653.5	814	435	414	599	529	637	497	555	399	452	533.1
1020	15597	15150	15979	15823	15545	15385	15674	15745	15740	16475	15711.3	817	435	415	599	530	637	503	558	401	454	534.9
1021	15652	15200	16041	15887	15603	15450	15729	15804	15792	16535	15769.3	818	435	417	600	531	643	505	560	402	458	536.9
1022	15700	15257	16109	15958	15655	15513	15799	15848	15856	16580	15827.5	826	437	418	603	531	645	505	564	404	463	539.6
1023	15758	15310	16156	16018	15698	15576	15841	15918	15915	16637	15882.7	830	437	417	605	532	646	506	565	404	465	540.7
1024	15817	15356	16208	16089	15755	15622	15908	15970	15975	16695	15939.5	833	438	420	607	536	648	507	570	408	467	543.4
1025	15895	15409	16273	16151	15815	15687	15973	16026	16032	16755	16001.6	835	438	424	608	538	650	511	574	411	469	545.8
1026	15949	15469	16321	16225	15860	15741	16032	16088	16100	16815	16060	842	440	424	609	540	654	515	574	411	468	547.7
1027	16010	15515	16389	16279	15904	15790	16088	16139	16168	16886	16116.8	843	440	426	613	539	655	518	573	412	469	548.8
1028	16072	15575	16435	16333	15955	15856	16148	16202	16225	16942	16174.3	844	441	429	612	542	660	518	576	412	470	550.4
1029	16133	15640	16486	16388	16015	15912	16207	16262	16279	17005	16232.7	847	441	433	617	544	665	519	577	414	472	552.9
1030	16188	15701	16539	16446	16077	15971	16262	16318	16345	17059	16290.6	850	443	437	618	548	666	522	577	413	475	554.9
1031	16259	15766	16599	16504	16131	16031	16307	16381	16395	17122	16349.5	851	444	440	623	553	668	524	578	415	477	557.3
1032	16320	15830	16676	16575	16197	16094	16370	16421	16471	17179	16413.3	856	444	442	624	553	671	524	579	418	477	558.8
1033	16373	15891	16729	16636	16245	16148	16432	16478	16533	17266	16473.1	858	445	445	627	554	672	526	585	420	478	561
1034	16431	15968	16780	16708	16304	16199	16484	16519	16600	17327	16532	866	449	449	630	554	674	528	588	421	480	563.9
1035	16494	16023	16835	16776	16355	16263	16544	16576	16663	17382	16591.1	873	450	450	633	556	678	531	589	421	480	566.1
1036	16546	16092	16890	16830	16415	16320	16609	16636	16728	17443	16650.9	874	452	452	634	560	680	534	589	421	481	567.7
1037	16596	16153	16962	16892	16481	16376	16669	16708	16797	17507	16714.1	879	455	452	637	560	683	537	592	423	481	569.9
1038	16657	16207	17031	16964	16536	16446	16733	16767	16875	17571	16778.7	881	457	452	641	561	685	538	593	426	481	571.5
1039	16717	16266	17103	17019	16603	16498	16799	16833	16957	17648	16844.3	885	459	454	646	562	684	540	597	428	486	574.1
1040	16784	16328	17170	17061	16654	16549	16862	16885	17004	17710	16900.7	887	461	456	649	565	685	541	598	432	486	576
1041	16841	16396	17241	17122	16716	16608	16934	16947	17070	17781	16965.6	890	463	456	648	565	691	541	601	436	486	577.7
1042	16889	16467	17288	17175	16778	16667	16996	16992	17128	17843	17022.3	893	464	457	652	567	693	541	605	440	489	580.1
1043	16956	16516	17335	17245	16855	16722	17050	17045	17199	17892	17081.5	894	465	459	652	569	695	546	608	443	491	582.2
1044	17011	16578	17397	17325	16922	16794	17103	17116	17269	17953	17146.8	896	467	461	655	567	696	551	612	445	492	584.2
1045	17068	16640	17460	17392	16988	16853	17181	17183	17337	18025	17212.7	902	468	460	655	567	696	555	612	446	493	585.4
1046	17144	16700	17523	17466	17055	16915	17241	17240	17399	18095	17277.8	907	467	461	655	567	699	554	619	446	496	587.1
1047	17214	16764	17603	17541	17126	16969	17304	17303	17475	18167	17346.6	913	470	461	658	569	703	556	619	448	499	589.6
1048	17277	16832	17659	17597	17182	17032	17378	17370	17541	18229	17409.7	915	470	459	662	575	704	556	622	448	499	591
1049	17333	16878	17725	17662	17243	17091	17443	17433	17599	18294	17470.1	918	471	459	664	578	706	558	626	448	503	593.1
1050	17382	16937	17800	17741	17306	17148	17517	17503	17660	18361	17535.5	921	473	462	667	579	706	560	624	449	506	594.7
1051	17452	16987	17858	17821	17358	17209	17583	17571	17715	18417	17597.1	928	473	462	665	584	706	562	624	451	507	596.2
1052	17510	17049	17933	17877	17419	17269	17635	17623	17783	18474	17657.2	929	474	468	672	586	706	564	623	451	508	598.1
1053	17565	17098	17983	17950	17477	17331	17698	17689	17854	18532	17717.7	931	475	470	671	588	712	563	625	451	509	599.5
1054	17633	17152	18045	18007	17542	17394	17760	17755	17927	18613	17782.8	936	476	470	672	588	717	564	629	454	512	601.8
1055	17701	17227	18126	18075	17605	17445	17827	17839	17992	18677	17851.4	938	477	471	672	587	723	565	632	458	513	603.6
1056	17784	17298	18208	18141	17675	17506	17879	17911	18055	18758	17921.5	940	479	475	672	587	726	566	634	461	513	605.3
1057	17836	17367	18264	18204	17725	17577	17942	17977	18110	18843	17984.5	946	478	478	673	592	729	568	636	461	515	607.6
1058	17914	17432	18318	18285	17779	17632	18007	18033	18181	18907	18048.8	947	478	479	675	593	733	569	640	461	515	609
1059	17985	17486	18385	18347	17848	17689	18079	18110	18248	18977	18115.4	951	480	480	677	593	734	573	647	463	515	611.3
1060	18062	17547	18457	18404	17918	17762	18146	18186	18320	19043	18184.5	953	480	481	681	593	734	574	650	464	516	612.6
1061	18132	17612	18530	18467	17985	17825	18222	18252	18397	19109	18253.1	954	483	480	680	595	736	575	651	468	518	614
1062	18199	17672	18596	18528	18037	17887	18292	18303	18467	19167	18314.8	963	483	482	682	599	738	579	655	471	516	616.8
1063	18264	17737	18652	18594	18101	17944	18373	18373	18532	19234	18380.4	968	482	486	684	599	739	582	653	472	518	618.3
1064	18335	17803	18713	18666	18172	18004	18437	18439	18599	19297	18446.5	976	482	489	688	599	738	585	655	472	518	620.2
1065	18391	17865	18789	18723	18242	18077	18504	18503	18661	19369	18512.4	981	483	492	690	603	743	585	659	475	518	622.9
1066	18458	17924	18863	18787	18303	18140	18589	18576	18725	19443	18580.8	985	489	491	689	604	745	585	661	476	519	624.4
1067	18523	17975	18926	18850	18358	18210	18657	18640	18788	19533	18646	988	492	494	689	604	747	587	661	478	519	625.9
1068	18593	18034	18988	18919	18422	18266	18731	18717	18853	19604	18712.7	988	493	502	689	605	747	588	660	481	519	627.2
1069	18675	18109	19056	18967	18485	18347	18788	18779	18932	19685	18782.3	990	496	503	690	604	749	591	665	482	521	629.1
1070	18735	18168	19133	19033	18547	18412	18852	18845	19004	19755	18848.4	992	496	501	689	605	750	592	670	484	522	630.1
1071	18809	18232	19197	19108	18595	18490	18923	18913	19073	19846	18918.6	994	497	502	691	607	750	592	675	485	524	631.7
1072	18880	18302	19274	19172	18663	18538	19005	18987	19140	19906	18986.7	996	496	505	693	611	753	594	679	487	526	634
1073	18940	18378	19340	19242	18750	18594	19082	19055	19196	19972	19054.9	1003	499	506	695	613	753	594	682	489	526	636
1074	19013	18453	19409	19304	18812	18656	19149	19109	19286	20054	19124.5	1010	503	507	695	616	755	594	683	492	527	638.2
1075	19108	18522	19479	19395	18881	18722	19237	19182	19339	20128	19199.3	1016	505	506	697	617	757	595	683	493	527	639.6
1076	19175	18592	19551	19473	18954	18783	19310	19243	19428	20210	19271.9	1018	505	506	700	617	757	599	686	494	531	641.3
1077	19240	18667	19633	19561	19022	18857	19375	19307	19490	20279	19343.1	1024	508	507	703	619	760	604	689	496	532	644.2
1078	19320	18741	19709	19624	19093	18929	19449	19379	19558	20346	19414.8	1028	509	509	706	620	762	604	691	497	533	645.9
1079	19396	18811	19791	19690	19167	18986	19516	19454	19632	20414	19485.7	1033	513	510	709	620	763	607	690	499	534	647.8
1080	19477	18881	19855	19775	19236	19072	19589	19530	19701	20488	19560.4	1034	516	511	712	621	765	607	692	504	535	649.7
1081	19557	18950	19926	19864	19275	19167	19653	19595	19752	20579	19631.8	1034	517	514	713	623	766	612	695	503	543	652
1082	19619	19010	20003	19923	19364	19228	19730	19667	19826	20654	19702.4	1040	517	517	718	625	771	613	697	506	546	655
1083	19686	19080	20065	19984	19434	19322	19804	19738	19899	20743	19775.5	1042	520	518	721	626	775	613	698	508	548	656.9
1084	19742	19156	20144	20043	19510	19384	19875	19814	19973	20810	19845.1	1046	520	521	724	627	777	617	700	511	552	659.5
1085	19807	19226	20210	20115	19573	19448	19939	19880	20051	20900	19914.9	1052	522	520	731	630	779	618	704	513	554	662.3
1086	19873	19317	20287	20179	19630	19528	19994	19961	20126	20966	19986.1	1056	524	523	736	630	780	621	707	514	556	664.7
1087	19947	19393	20358	20234	19696	19595	20082	20019	20204	21042	20057	1063	527	525	736	632	781	628	708	516	557	667.3
1088	20001	19454	20432	20301	19779	19687	20160	20091	20269	21121	20129.5	1067	530	527	737	635	783	628	711	516	556	669
1089	20084	19532	20504	20365	19847	19754	20233	20177	20333	21216	20204.5	1069	530	527	741	638	784	631	718	517	558	671.3
1090	20144	19598	20589	20426	19925	19834	20298	20271	20402	21289	20277.6	1076	532	528	746	645	783	631	720	518	559	673.8
1091	20220	19664	20654	20524	19991	19907	20392	20336	20486	21373	20354.7	1079	534	530	749	646	791	632	721	520	562	676.4
1092	20288	19730	20734	20598	20086	19983	20462	20413	20547	21457	20429.8	1085	535	532	752	649	794	634	724	520	567	679.2
1093	20365	19815	20811	20704	20159	20057	20537	20498	20627	21536	20510.9	1090	535	534	750	652	797	635	726	521	568	680.8
1094	20461	19894	20886	20764	20228	20124	20619	20558	20705	21616	20585.5	1095	540	538	755	652	797	638	728	521	570	683.4
1095	20539	19964	20976	20843	20295	20204	20687	20648	20801	21700	20665.7	1101	540	539	757	657	803	638	728	521	570	685.4
1096	20617	20044	21064	20931	20379	20271	20767	20740	20872	21778	20746.3	1110	541	542	760	660	805	638	730	524	571	688.1
1097	20699	20106	21153	20996	20468	20333	20855	20818	20954	21857	20823.9	1115	543	545	761	665	809	643	733	525	572	691.1
1098	20756	20169	21228	21070	20533	20402	20925	20887	21032	21946	20894.8	1117	545	545	760	667	814	647	733	525	574	692.7
1099	20821	20242	21301	21150	20607	20473	20976	20967	21090	22022	20964.9	1119	549	549	762	667	816	651	738	527	574	695.2
1100	20891	20310	21400	21234	20699	20546	21029	21053	21161	22106	21042.9	1124	551	552	767	669	819	653	742	530	575	698.2
1101	20957	20387	21490	21299	20767	20609	21106	21123	21226	22187	21115.1	1126	554	554	767	673	822	655	745	531	580	700.7
1102	21027	20459	21568	21379	20837	20677	21192	21214	21307	22258	21191.8	1136	555	557	769	675	825	656	745	534	581	703.3
1103	21109	20536	21650	21454	20909	20753	21270	21295	21380	22333	21268.9	1145	557	557	771	678	825	659	745	542	585	706.4
1104	21199	20622	21720	21529	20985	20824	21343	21377	21456	22406	21346.1	1151	560	557	772	681	829	661	749	544	587	709.1
1105	21275	20692	21796	21614	21071	20896	21412	21470	21543	22478	21424.7	1157	560	557	777	682	831	665	753	545	587	711.4
1106	21348	20764	21886	21704	21141	20975	21483	21558	21616	22567	21504.2	1157	562	558	781	686	832	667	755	549	588	713.5
1107	21427	20847	21979	21774	21220	21031	21562	21635	21711	22649	21583.5	1158	563	562	783	689	836	672	755	549	590	715.7
1108	21513	20924	22082	21854	21311	21120	21651	21722	21791	22727	21669.5	1165	563	562	784	689	835	672	756	549	593	716.8
1109	21606	20998	22147	21935	21382	21193	21730	21812	21871	22800	21747.4	1168	566	567	785	692	838	673	757	549	593	718.8
1110	21690	21063	22211	22024	21452	21275	21811	21909	21964	22888	21828.7	1170	570	569	787	696	841	678	760	551	597	721.9
1111	21779	21131	22293	22113	21546	21336	21874	21994	22033	22971	21907	1174	571	570	792	700	843	680	762	555	602	724.9
1112	21853	21212	22387	22196	21647	21413	21957	22070	22139	23043	21991.7	1177	574	571	792	702	847	682	767	557	603	727.2
1113	21932	21292	22457	22270	21724	21503	22023	22150	22210	23120	22068.1	1184	574	573	795	704	851	685	770	560	604	730
1114	21996	21361	22541	22350	21815	21587	22094	22232	22306	23224	22150.6	1190	577	573	805	707	852	689	771	562	607	733.3
1115	22067	21438	22614	22421	21891	21667	22196	22332	22387	23331	22234.4	1194	580	573	812	708	856	693	774	563	608	736.1
1116	22144	21515	22694	22508	21987	21735	22284	22412	22462	23413	22315.4	1196	581	574	815	711	860	696	779	566	609	738.7
1117	22242	21615	22780	22584	22083	21805	22387	22505	22546	23510	22405.7	1199	582	575	818	715	861	697	780	565	610	740.2
1118	22334	21709	22856	22668	22178	21899	22468	22575	22631	23604	22492.2	1204	584	574	818	721	869	700	785	567	612	743.4
1119	22427	21788	22932	22735	22258	21983	22557	22651	22710	23694	22573.5	1209	587	575	821	727	870	702	787	569	614	746.1
1120	22491	21851	23010	22829	22344	22070	22627	22727	22803	23775	22652.7	1215	588	578	829	729	872	702	787	572	616	748.8
1121	22569	21931	23096	22917	22414	22159	22721	22809	22880	23859	22735.5	1218	590	579	832	734	873	706	788	572	618	751
1122	22646	22006	23179	23017	22512	22229	22790	22876	22978	23944	22817.7	1221	591	580	836	737	877	708	791	574	620	753.5
1123	22736	22093	23265	23102	22589	22316	22901	22963	23067	24040	22907.2	1227	593	582	837	743	887	710	795	575	623	757.2
1124	22830	22175	23343	23188	22670	22420	22994	23058	23166	24121	22996.5	1231	597	587	837	743	888	711	799	577	624	759.4
1125	22908	22251	23433	23270	22756	22500	23073	23137	23256	24218	23080.2	1234	597	591	841	746	889	712	800	577	627	761.4
1126	22984	22345	23504	23370	22846	22585	23153	23225	23338	24305	23165.5	1240	597	591	842	747	893	712	804	577	628	763.1
1127	23062	22443	23592	23468	22926	22670	23249	23322	23424	24398	23255.4	1246	596	592	842	749	895	714	804	579	628	764.5
1128	23153	22507	23683	23556	23018	22751	23341	23428	23507	24485	23342.9	1250	597	594	848	748	900	717	806	581	628	766.9
1129	23237	22597	23772	23647	23110	22837	23454	23523	23586	24582	23434.5	1259	600	596	850	749	903	722	811	583	628	770.1
1130	23325	22686	23851	23728	23206	22926	23552	23617	23663	24659	23521.3	1264	603	596	855	752	908	723	812	584	632	772.9
1131	23422	22784	23951	23806	23292	23009	23648	23704	23746	24766	23612.8	1266	604	599	857	751	912	723	811	587	634	774.4
1132	23514	22881	24035	23890	23379	23103	23736	23815	23835	24871	23705.9	1273	603	599	864	754	913	725	817	590	639	777.7
1133	23582	22955	24121	23983	23470	23186	23816	23902	23918	24975	23790.8	1275	605	600	869	759	918	729	820	592	642	780.9
1134	23683	23046	24226	24081	23557	23266	23918	23994	24015	25061	23884.7	1279	609	601	870	763	918	730	824	594	644	783.2
1135	23781	23124	24330	24175	23651	23367	24010	24076	24100	25168	23978.2	1284	611	602	874	765	925	733	829	594	644	786.1
1136	23864	23209	24421	24266	23731	23464	24084	24166	24183	25254	24064.2	1284	614	600	874	770	930	739	832	599	644	788.6
1137	23944	23289	24517	24375	23826	23566	24177	24250	24282	25346	24157.2	1290	616	602	878	772	932	741	838	599	648	791.6
1138	24042	23380	24598	24460	23916	23654	24287	24331	24384	25441	24249.3	1291	619	604	881	776	936	743	842	601	648	794.1
1139	24137	23458	24683	24563	23996	23756	24407	24413	24463	25555	24343.1	1295	621	605	882	781	939	743	844	606	647	796.3
1140	24206	23542	24766	24660	24113	23847	24512	24491	24570	25640	24434.7	1302	625	605	883	782	944	742	847	609	652	799.1
1141	24298	23629	24866	24750	24207	23943	24591	24576	24667	25729	24525.6	1308	626	610	886	785	947	743	851	611	651	801.8
1142	24387	23731	24951	24849	24293	24037	24687	24676	24754	25826	24619.1	1313	626	610	894	785	949	743	850	612	653	803.5
1143	24483	23815	25038	24955	24393	24136	24787	24778	24859	25922	24716.6	1315	631	611	900	789	952	747	856	614	655	807
1144	24595	23903	25135	25050	24490	24226	24892	24879	24966	26020	24815.6	1321	633	615	903	792	957	749	859	616	659	810.4
1145	24692	23984	25244	25156	24590	24315	24991	24970	25078	26109	24912.9	1326	633	617	904	800	957	749	862	619	661	812.8
1146	24772	24081	25326	25239	24678	24411	25092	25065	25164	26207	25003.5	1330	634	619	905	803	960	751	867	624	664	815.7
1147	24880	24166	25428	25317	24762	24510	25182	25160	25270	26313	25098.8	1338	634	624	910	807	966	758	869	627	665	819.8
1148	24975	24271	25511	25396	24866	24600	25274	25250	25362	26401	25190.6	1341	639	625	914	811	970	759	869	627	670	822.5
1149	25079	24346	25597	25485	24945	24697	25355	25320	25446	26493	25276.3	1345	642	626	917	812	976	759	872	629	673	825.1
1150	25176	24461	25696	25582	25029	24808	25454	25421	25549	26612	25378.8	1349	645	627	919	813	986	761	875	631	675	828.1
1151	25271	24552	25795	25695	25119	24896	25548	25517	25645	26705	25474.3	1356	648	627	923	816	990	765	881	632	681	831.9
1152	25374	24635	25885	25783	25205	24992	25632	25598	25724	26811	25563.9	1360	652	628	923	818	990	767	883	632	683	833.6
1153	25447	24717	25995	25890	25305	25089	25747	25686	25834	26921	25663.1	1363	653	628	925	821	996	771	885	637	685	836.4
1154	25531	24810	26076	25985	25395	25189	25842	25788	25927	27014	25755.7	1370	656	630	926	825	1002	770	884	640	688	839.1
1155	25617	24912	26175	26078	25494	25292	25946	25884	26022	27127	25854.7	1376	657	630	928	824	1005	774	889	640	688	841.1
1156	25719	25003	26263	26182	25580	25381	26034	25972	26106	27227	25946.7	1379	658	632	933	825	1012	776	892	641	691	843.9
1157	25795	25083	26352	26272	25669	25483	26112	26077	26212	27332	26038.7	1387	661	635	937	832	1017	780	895	645	693	848.2
1158	25894	25167	26436	26358	25760	25574	26224	26173	26302	27425	26131.3	1391	668	633	945	833	1021	784	896	644	694	850.9
1159	25990	25259	26538	26452	25853	25665	26342	26270	26400	27525	26229.4	1400	672	635	948	835	1025	787	897	647	698	854.4
1160	26076	25350	26644	26564	25937	25771	26454	26384	26498	27629	26330.7	1401	676	637	952	838	1026	794	899	650	701	857.4
1161	26188	25436	26746	26662	26042	25872	26543	26487	26595	27726	26429.7	1408	677	640	953	840	1029	799	902	650	705	860.3
1162	26280	25523	26859	26771	26155	25973	26638	26581	26693	27841	26531.4	1414	680	642	957	840	1037	803	903	653	705	863.4
1163	26376	25620	26973	26860	26249	26080	26735	26682	26798	27943	26631.6	1419	683	643	959	841	1038	804	904	654	706	865.1
1164	26475	25709	27106	26958	26367	26176	26830	26777	26890	28062	26735	1423	685	644	961	843	1039	809	906	653	709	867.2
1165	26580	25814	27197	27075	26475	26292	26920	26901	26974	28171	26839.9	1428	687	647	964	846	1042	813	906	657	711	870.1
1166	26688	25891	27286	27179	26585	26391	27022	26998	27085	28282	26940.7	1434	690	649	965	848	1042	815	910	662	711	872.6
1167	26798	25967	27387	27281	26699	26505	27123	27098	27169	28380	27040.7	1438	691	651	970	850	1046	816	911	664	713	875
1168	26880	26070	27490	27370	26808	26602	27206	27197	27284	28518	27142.5	1443	695	651	972	855	1046	819	915	668	718	878.2
1169	26987	26163	27590	27460	26919	26691	27306	27283	27388	28630	27241.7	1447	696	655	977	858	1048	821	916	672	723	881.3
1170	27087	26268	27662	27576	27014	26800	27405	27383	27489	28731	27341.5	1452	701	660	976	862	1049	820	918	674	725	883.7
1171	27187	26367	27764	27671	27112	26896	27503	27483	27582	28850	27441.5	1457	703	659	979	866	1048	828	921	678	729	886.8
1172	27277	26451	27870	27775	27195	27001	27588	27597	27689	28957	27540	1460	701	661	980	867	1053	833	924	681	730	889
1173	27384	26548	27976	27889	27309	27102	27686	27702	27804	29055	27645.5	1465	707	665	986	871	1059	833	931	683	731	893.1
1174	27494	26647	28071	27995	27408	27197	27785	27815	27913	29159	27748.4	1471	711	666	993	875	1067	836	935	684	733	897.1
1175	27610	26759	28166	28127	27503	27309	27878	27893	28023	29277	27854.5	1474	713	672	996	877	1073	839	936	684	737	900.1
1176	27702	26869	28276	28220	27598	27418	27976	28001	28130	29365	27955.5	1479	715	678	1002	876	1071	844	939	688	736	902.8
1177	27801	26976	28387	28333	27709	27514	28083	28101	28227	29467	28059.8	1486	721	681	1003	880	1073	845	941	690	737	905.7
1178	27881	27097	28482	28454	27814	27617	28183	28204	28332	29583	28164.7	1492	722	688	1005	883	1075	851	942	694	740	909.2
1179	27982	27204	28587	28566	27911	27705	28288	28315	28442	29681	28268.1	1497	725	692	1008	885	1078	852	950	694	741	912.2
1180	28086	27316	28716	28651	28023	27799	28397	28416	28558	29797	28375.9	1499	726	694	1010	886	1087	857	950	693	743	914.5
1181	28185	27420	28826	28763	28124	27899	28503	28509	28655	29901	28478.5	1505	729	699	1012	890	1090	861	952	697	745	918
1182	28284	27515	28917	28882	28228	28022	28603	28610	28752	30006	28581.9	1510	731	700	1011	893	1090	863	956	701	745	920
1183	28370	27620	29024	28984	28340	28128	28693	28719	28861	30113	28685.2	1511	734	702	1010	895	1095	865	957	707	747	922.3
1184	28480	27734	29147	29090	28428	28232	28786	28844	28973	30214	28792.8	1518	737	702	1013	901	1097	867	961	708	747	925.1
1185	28591	27841	29267	29197	28540	28354	28900	28968	29071	30319	28904.8	1523	738	706	1016	903	1101	868	966	710	751	928.2
1186	28689	27945	29365	29314	28648	28473	28997	29068	29154	30421	29007.4	1526	741	709	1017	906	1111	871	970	712	758	932.1
1187	28783	28041	29489	29408	28763	28600	29096	29188	29246	30524	29113.8	1530	745	715	1019	909	1112	872	978	713	761	935.4
1188	28886	28167	29595	29509	28868	28707	29193	29274	29365	30629	29219.3	1533	750	721	1023	913	1115	871	981	717	767	939.1
1189	28987	28273	29718	29613	28958	28805	29314	29382	29463	30742	29325.5	1538	751	723	1025	919	1120	872	980	720	771	941.9
1190	29070	28380	29831	29725	29063	28910	29415	29485	29570	30853	29430.2	1550	753	725	1028	922	1120	875	983	721	778	945.5
1191	29198	28485	29942	29853	29177	29026	29512	29600	29688	30978	29545.9	1557	756	727	1029	930	1126	878	991	722	783	949.9
1192	29319	28578	30064	29955	29279	29131	29633	29708	29795	31103	29656.5	1563	760	730	1029	929	1126	883	994	726	785	952.5
1193	29432	28691	30183	30042	29391	29232	29751	29819	29920	31209	29767	1569	760	730	1034	931	1132	892	995	727	790	956
1194	29534	28778	30289	30170	29496	29327	29880	29915	30050	31333	29877.2	1573	760	732	1037	938	1136	893	1001	727	795	959.2
1195	29653	28888	30407	30299	29597	29445	29991	30015	30162	31455	29991.2	1580	761	733	1043	938	1139	899	1000	727	798	961.8
1196	29753	29003	30526	30405	29710	29547	30133	30118	30252	31568	30101.5	1587	762	737	1046	940	1146	903	1000	727	797	964.5
1197	29853	29117	30630	30525	29807	29661	30246	30215	30370	31673	30209.7	1592	765	739	1046	942	1155	906	1002	727	800	967.4
1198	29985	29241	30756	30647	29918	29780	30360	30316	30484	31786	30327.3	1599	769	747	1045	945	1157	905	1003	728	803	970.1
1199	30092	29342	30856	30748	30015	29903	30467	30424	30595	31901	30434.3	1604	771	751	1049	949	1161	906	1007	728	810	973.6
1200	30191	29473	30977	30859	30115	30006	30582	30525	30707	32018	30545.3	1607	778	754	1051	953	1165	910	1013	729	811	977.1
1201	30297	29597	31098	30994	30226	30111	30701	30632	30844	32146	30664.6	1614	781	757	1064	959	1173	910	1018	729	817	982.2
1202	30411	29689	31205	31114	30346	30204	30816	30742	30974	32283	30778.4	1617	784	761	1068	960	1176	910	1021	734	817	984.8
1203	30529	29777	31314	31259	30459	30314	30932	30849	31089	32401	30892.3	1625	786	767	1073	961	1182	910	1025	735	822	988.6
1204	30622	29893	31430	31389	30559	30420	31046	30966	31229	32541	31009.5	1634	789	768	1077	964	1185	913	1028	743	824	992.5
1205	30734	30025	31543	31501	30654	30552	31156	31082	31344	32665	31125.6	1640	792	770	1080	968	1189	918	1032	746	827	996.2
1206	30838	30136	31640	31606	30765	30681	31271	31181	31454	32793	31236.5	1649	792	772	1083	970	1190	920	1033	749	828	998.6
1207	30964	30239	31763	31726	30863	30787	31386	31294	31570	32906	31349.8	1657	795	774	1090	975	1192	925	1034	754	832	1002.8
1208	31086	30345	31865	31846	30962	30902	31490	31422	31685	33028	31463.1	1666	798	776	1091	980	1196	927	1035	755	837	1006.1
1209	31198	30470	31996	31957	31067	30998	31605	31549	31820	33164	31582.4	1670	799	782	1090	983	1203	929	1037	756	842	1009.1
1210	31306	30587	32118	32085	31199	31091	31734	31669	31932	33310	31703.1	1675	799	786	1096	985	1206	931	1038	757	844	1011.7
1211	31434	30717	32250	32213	31297	31194	31879	31792	32047	33431	31825.4	1684	800	785	1098	990	1207	933	1043	758	847	1014.5
1212	31552	30838	32346	32308	31424	31304	32017	31913	32180	33570	31945.2	1690	803	787	1102	996	1206	938	1046	760	849	1017.7
1213	31671	30946	32472	32462	31546	31419	32137	32025	32289	33682	32064.9	1692	808	790	1103	999	1208	942	1049	760	852	1020.3
1214	31782	31046	32584	32590	31670	31516	32276	32145	32420	33815	32184.4	1695	812	792	1107	1003	1209	946	1052	766	856	1023.8
1215	31890	31164	32715	32713	31774	31659	32394	32248	32537	33932	32302.6	1700	813	793	1113	1009	1212	949	1058	770	860	1027.7
1216	32016	31261	32860	32811	31891	31760	32514	32371	32667	34031	32418.2	1710	815	795	1121	1011	1215	953	1064	772	862	1031.8
1217	32132	31359	32965	32925	32025	31876	32642	32504	32790	34147	32536.5	1719	816	797	1128	1016	1217	958	1065	774	865	1035.5
1218	32277	31482	33081	33048	32147	32007	32760	32617	32917	34290	32662.6	1727	822	800	1129	1017	1220	961	1071	774	866	1038.7
1219	32388	31593	33207	33168	32272	32106	32871	32748	33045	34408	32780.6	1735	825	805	1133	1023	1221	967	1073	776	868	1042.6
1220	32496	31725	33329	33286	32411	32209	33004	32876	33178	34533	32904.7	1746	828	807	1141	1024	1224	968	1075	775	872	1046
1221	32621	31835	33459	33424	32528	32317	33132	33011	33297	34670	33029.4	1755	832	810	1145	1026	1224	968	1076	777	875	1048.8
1222	32738	31925	33588	33574	32646	32431	33245	33123	33424	34787	33148.1	1766	836	814	1152	1029	1227	971	1083	782	879	1053.9
1223	32864	32034	33706	33691	32757	32545	33377	33241	33516	34913	33264.4	1773	841	816	1157	1033	1234	972	1085	786	883	1058
1224	32989	32141	33822	33816	32870	32675	33503	33376	33649	35034	33387.5	1782	845	820	1164	1035	1234	976	1088	786	886	1061.6
1225	33116	32282	33945	33936	32985	32792	33638	33495	33759	35164	33511.2	1790	848	822	1166	1039	1237	979	1093	792	889	1065.5
1226	33233	32392	34060	34048	33088	32912	33769	33632	33884	35291	33630.9	1793	847	825	1172	1045	1238	985	1101	793	889	1068.8
1227	33354	32503	34205	34203	33210	33040	33903	33752	34009	35416	33759.5	1794	849	829	1175	1047	1244	984	1104	796	890	1071.2
1228	33477	32623	34356	34330	33320	33165	34018	33887	34138	35537	33885.1	1806	851	834	1179	1052	1248	987	1107	801	887	1075.2
1229	33593	32733	34481	34446	33432	33289	34126	34006	34261	35670	34003.7	1815	855	837	1184	1055	1253	990	1114	804	888	1079.5
1230	33711	32839	34599	34584	33534	33401	34250	34137	34381	35803	34123.9	1820	861	840	1193	1059	1263	992	1118	804	890	1084
1231	33823	32946	34730	34720	33666	33525	34373	34251	34504	35948	34248.6	1827	862	842	1199	1062	1266	996	1119	802	894	1086.9
1232	33948	33066	34869	34851	33800	33636	34492	34380	34645	36068	34375.5	1835	864	842	1202	1066	1265	997	1127	805	896	1089.9
1233	34083	33182	34969	34966	33933	33737	34599	34497	34745	36213	34492.4	1841	866	844	1205	1069	1274	1001	1128	809	898	1093.5
1234	34201	33292	35102	35079	34064	33851	34716	34626	34856	36344	34613.1	1852	870	847	1210	1071	1277	1006	1131	810	900	1097.4
1235	34335	33398	35223	35216	34184	33968	34846	34756	34975	36453	34735.4	1862	875	850	1212	1073	1278	1011	1135	814	901	1101.1
1236	34462	33529	35355	35347	34299	34097	34956	34902	35097	36584	34862.8	1866	878	853	1217	1079	1284	1017	1138	818	903	1105.3
1237	34600	33666	35516	35488	34423	34228	35086	35054	35216	36718	34999.5	1872	880	855	1222	1080	1288	1021	1144	818	907	1108.7
1238	34709	33809	35654	35642	34538	34344	35220	35176	35329	36852	35127.3	1881	884	859	1224	1087	1296	1024	1147	820	910	1113.2
1239	34822	33939	35797	35770	34645	34460	35360	35299	35485	37013	35259	1887	884	858	1228	1089	1302	1029	1151	824	912	1116.4
1240	34968	34066	35933	35869	34774	34575	35487	35420	35641	37143	35387.6	1893	886	859	1234	1090	1307	1032	1155	826	910	1119.2
1241	35112	34192	36075	36003	34896	34712	35604	35541	35786	37267	35518.8	1896	888	862	1237	1097	1312	1034	1158	827	909	1122
1242	35236	34322	36211	36130	35030	34833	35732	35662	35910	37406	35647.2	1910	890	868	1240	1105	1319	1040	1164	828	912	1127.6
1243	35375	34461	36343	36260	35156	34954	35852	35767	36044	37566	35777.8	1917	894	869	1241	1108	1328	1044	1168	833	915	1131.7
1244	35520	34575	36480	36382	35278	35077	35989	35886	36169	37698	35905.4	1923	894	870	1243	1112	1331	1046	1175	835	920	1134.9
1245	35661	34708	36619	36522	35397	35213	36128	36038	36312	37829	36042.7	1927	897	873	1249	1114	1335	1048	1183	840	920	1138.6
1246	35783	34838	36753	36668	35530	35353	36250	36168	36430	37986	36175.9	1932	898	874	1253	1120	1340	1053	1186	844	922	1142.2
1247	35908	34975	36908	36804	35661	35468	36380	36316	36547	38111	36307.8	1941	900	878	1260	1121	1348	1055	1189	848	922	1146.2
1248	36045	35113	37052	36943	35777	35578	36477	36479	36687	38265	36441.6	1944	900	881	1268	1125	1351	1061	1191	852	925	1149.8
1249	36166	35256	37174	37082	35880	35715	36613	36615	36841	38404	36574.6	1953	905	882	1268	1128	1351	1065	1199	853	928	1153.2
1250	36311	35381	37329	37223	36021	35829	36747	36738	36989	38560	36712.8	1961	906	884	1270	1132	1356	1068	1204	861	931	1157.3
1251	36425	35509	37488	37355	36139	35951	36882	36868	37101	38698	36841.6	1966	909	886	1275	1138	1360	1073	1206	863	934	1161
1252	36568	35632	37628	37480	36291	36096	37015	36989	37247	38860	36980.6	1974	909	892	1277	1143	1365	1076	1215	866	934	1165.1
1253	36712	35774	37751	37630	36435	36210	37120	37150	37388	39016	37118.6	1984	909	895	1286	1145	1369	1080	1216	866	936	1168.6
1254	36831	35889	37884	37758	36576	36345	37249	37307	37528	39151	37251.8	1992	912	901	1290	1146	1374	1087	1221	872	936	1173.1
1255	36963	36031	38026	37898	36718	36496	37388	37472	37679	39296	37396.7	1996	915	903	1293	1147	1377	1087	1230	877	941	1176.6
1256	37102	36166	38174	38026	36871	36629	37532	37619	37826	39443	37538.8	2005	915	905	1297	1154	1382	1091	1232	883	943	1180.7
1257	37248	36291	38339	38149	37013	36773	37680	37762	37946	39585	37678.6	2014	918	909	1302	1163	1388	1092	1236	886	947	1185.5
1258	37403	36423	38481	38300	37135	36894	37814	37898	38085	39733	37816.6	2018	921	910	1305	1167	1394	1100	1242	887	949	1189.3
1259	37542	36562	38635	38431	37273	37036	37959	38034	38223	39884	37957.9	2026	922	915	1307	1172	1395	1102	1244	889	954	1192.6
1260	37694	36699	38780	38586	37405	37185	38108	38178	38369	40004	38100.8	2028	928	921	1307	1173	1396	1109	1254	893	959	1196.8
1261	37831	36829	38920	38709	37572	37306	38251	38317	38541	40163	38243.9	2032	931	922	1315	1176	1396	1111	1256	894	962	1199.5
1262	37993	36958	39054	38848	37699	37454	38393	38457	38670	40297	38382.3	2036	932	925	1318	1178	1400	1111	1260	899	965	1202.4
1263	38131	37099	39197	38980	37815	37582	38523	38607	38826	40458	38521.8	2041	932	926	1323	1181	1406	1115	1261	904	969	1205.8
1264	38280	37230	39340	39124	37957	37698	38635	38759	38956	40589	38656.8	2048	934	930	1326	1183	1411	1116	1269	907	972	1209.6
1265	38432	37339	39490	39266	38105	37839	38805	38892	39102	40759	38802.9	2052	940	934	1329	1184	1415	1119	1271	909	977	1213
1266	38583	37474	39647	39392	38254	37980	38937	39040	39249	40911	38946.7	2060	941	935	1336	1189	1420	1123	1275	911	980	1217
1267	38733	37618	39796	39535	38392	38110	39100	39188	39393	41075	39094	2075	945	935	1339	1193	1422	1124	1277	915	984	1220.9
1268	38864	37771	39919	39688	38548	38242	39240	39322	39540	41201	39233.5	2086	948	939	1342	1196	1426	1126	1280	918	990	1225.1
1269	39003	37925	40055	39838	38722	38374	39395	39474	39695	41349	39383	2094	950	945	1350	1199	1431	1128	1279	923	994	1229.3
1270	39158	38061	40194	39965	38870	38543	39515	39622	39843	41504	39527.5	2107	953	944	1352	1201	1443	1129	1288	928	995	1234
1271	39295	38191	40360	40095	39048	38693	39669	39785	39998	41651	39678.5	2116	955	948	1359	1205	1448	1133	1294	928	996	1238.2
1272	39445	38337	40492	40250	39186	38845	39796	39924	40142	41807	39822.4	2132	954	949	1359	1210	1451	1134	1300	931	999	1241.9
1273	39592	38487	40629	40408	39326	38996	39950	40081	40273	41957	39969.9	2137	960	952	1362	1215	1451	1138	1305	933	1003	1245.6
1274	39733	38638	40783	40584	39483	39120	40103	40247	40420	42125	40123.6	2152	962	954	1367	1219	1460	1144	1314	934	1003	1250.9
1275	39873	38777	40934	40720	39662	39277	40244	40396	40561	42275	40271.9	2157	965	957	1370	1225	1464	1150	1319	939	1003	1254.9
1276	40035	38935	41084	40886	39820	39428	40411	40572	40697	42414	40428.2	2163	966	960	1369	1227	1467	1152	1321	943	1004	1257.2
1277	40178	39097	41228	41049	39964	39581	40543	40728	40846	42577	40579.1	2170	968	964	1374	1235	1475	1156	1324	945	1012	1262.3
1278	40322	39239	41374	41194	40100	39709	40706	40880	40978	42733	40723.5	2179	970	966	1383	1239	1481	1161	1327	948	1015	1266.9
1279	40442	39371	41509	41325	40271	39842	40872	41047	41121	42883	40868.3	2189	970	970	1387	1242	1484	1164	1333	953	1015	1270.7
1280	40596	39521	41644	41471	40439	40007	41036	41203	41267	43043	41022.7	2199	973	975	1390	1245	1489	1168	1337	954	1017	1274.7
1281	40736	39657	41807	41627	40605	40142	41193	41355	41425	43226	41177.3	2202	973	979	1390	1247	1492	1173	1342	960	1023	1278.1
1282	40886	39794	41961	41791	40734	40311	41344	41518	41548	43380	41326.7	2210	976	982	1393	1249	1495	1175	1344	961	1027	1281.2
1283	41038	39951	42107	41948	40897	40452	41494	41668	41702	43560	41481.7	2216	979	983	1399	1256	1498	1182	1346	963	1027	1284.9
1284	41170	40110	42273	42097	41058	40591	41659	41860	41865	43728	41641.1	2223	982	984	1404	1258	1504	1184	1348	964	1031	1288.2
1285	41291	40253	42415	42242	41236	40740	41831	41992	42011	43896	41790.7	2227	984	987	1412	1263	1508	1184	1349	964	1035	1291.3
1286	41443	40402	42546	42383	41410	40896	41997	42169	42186	44070	41950.2	2234	985	994	1415	1269	1514	1192	1355	970	1037	1296.5
1287	41607	40569	42707	42531	41568	41044	42165	42335	42346	44230	42110.2	2241	990	999	1416	1271	1518	1199	1363	975	1042	1301.4
1288	41781	40711	42874	42669	41722	41193	42339	42496	42511	44388	42268.4	2249	993	1001	1423	1273	1524	1203	1368	982	1045	1306.1
1289	41954	40845	43040	42830	41897	41353	42487	42653	42672	44555	42428.6	2259	994	1004	1430	1275	1526	1205	1373	983	1046	1309.5
1290	42115	41002	43185	43001	42047	41510	42654	42809	42826	44730	42587.9	2267	1000	1008	1432	1279	1529	1205	1378	984	1051	1313.3
1291	42278	41160	43374	43163	42183	41677	42822	42963	42990	44880	42749	2275	1003	1012	1437	1284	1531	1207	1387	986	1056	1317.8
1292	42427	41299	43503	43320	42348	41830	42960	43139	43148	45032	42900.6	2282	1006	1014	1441	1291	1536	1209	1396	987	1060	1322.2
1293	42574	41467	43696	43493	42506	41972	43127	43301	43299	45230	43066.5	2291	1014	1020	1443	1292	1539	1214	1399	988	1064	1326.4
1294	42725	41626	43867	43661	42667	42122	43291	43458	43453	45405	43227.5	2299	1016	1020	1444	1293	1540	1220	1399	996	1067	1329.4
1295	42878	41774	44016	43826	42809	42258	43446	43637	43644	45588	43387.6	2306	1015	1021	1446	1295	1544	1224	1401	999	1069	1332
1296	43050	41921	44204	44007	42974	42411	43604	43812	43835	45771	43558.9	2310	1019	1022	1453	1299	1547	1227	1404	998	1074	1335.3
1297	43198	42082	44365	44167	43138	42588	43767	43982	43981	45947	43721.5	2319	1022	1026	1453	1308	1555	1230	1408	1005	1075	1340.1
1298	43352	42252	44534	44332	43309	42744	43952	44131	44139	46115	43886	2326	1025	1030	1454	1310	1562	1234	1411	1005	1077	1343.4
1299	43515	42423	44729	44498	43474	42904	44129	44282	44299	46275	44052.8	2340	1028	1032	1459	1312	1567	1239	1414	1011	1080	1348.2
1300	43674	42585	44900	44660	43636	43064	44267	44457	44454	46439	44213.6	2348	1033	1030	1460	1315	1569	1246	1418	1014	1083	1351.6
1301	43810	42742	45043	44832	43778	43257	44441	44632	44635	46595	44376.5	2358	1039	1032	1463	1322	1573	1246	1423	1020	1086	1356.2
1302	43992	42905	45192	45010	43935	43446	44587	44801	44821	46777	44546.6	2368	1043	1035	1469	1326	1573	1248	1425	1024	1085	1359.6
1303	44170	43061	45357	45184	44104	43607	44758	44988	44982	46961	44717.2	2377	1044	1040	1475	1328	1579	1251	1427	1026	1090	1363.7
1304	44334	43238	45518	45360	44268	43780	44909	45151	45146	47139	44884.3	2390	1054	1040	1484	1335	1581	1257	1427	1028	1095	1369.1
1305	44512	43391	45672	45528	44441	43912	45077	45310	45319	47314	45047.6	2399	1061	1043	1490	1338	1585	1260	1433	1036	1097	1374.2
1306	44680	43557	45836	45713	44620	44089	45283	45485	45491	47508	45226.2	2409	1068	1045	1497	1339	1587	1265	1431	1039	1105	1378.5
1307	44800	43712	46011	45862	44795	44252	45455	45656	45661	47685	45388.9	2417	1069	1045	1503	1349	1591	1266	1435	1041	1109	1382.5
1308	44996	43855	46195	46042	44965	44422	45627	45837	45830	47870	45563.9	2424	1074	1045	1507	1357	1602	1270	1441	1045	1114	1387.9
1309	45174	44004	46379	46210	45134	44601	45789	46008	46003	48067	45736.9	2427	1077	1052	1513	1360	1606	1277	1445	1052	1123	1393.2
1310	45334	44182	46559	46374	45310	44765	45950	46178	46154	48259	45906.5	2436	1081	1055	1516	1362	1613	1280	1449	1053	1131	1397.6
1311	45512	44339	46731	46551	45484	44942	46119	46360	46330	48441	46080.9	2445	1083	1055	1518	1367	1616	1285	1454	1056	1133	1401.2
1312	45680	44512	46896	46709	45643	45092	46275	46539	46491	48635	46247.2	2452	1087	1058	1522	1374	1622	1295	1456	1057	1135	1405.8
1313	45866	44693	47074	46859	45809	45291	46458	46700	46667	48820	46423.7	2459	1094	1060	1529	1377	1627	1297	1462	1059	1140	1410.4
1314	46052	44871	47263	47071	46009	45490	46624	46892	46847	48997	46611.6	2469	1101	1062	1535	1382	1626	1308	1466	1063	1144	1415.6
1315	46216	45041	47434	47239	46170	45666	46824	47019	47014	49178	46780.1	2478	1109	1064	1541	1392	1629	1310	1473	1061	1147	1420.4
1316	46395	45186	47632	47425	46321	45847	47022	47175	47184	49351	46953.8	2482	1111	1066	1550	1398	1633	1316	1479	1063	1152	1425
1317	46567	45362	47818	47605	46482	46011	47189	47359	47363	49546	47130.2	2494	1116	1067	1557	1408	1638	1318	1485	1065	1154	1430.2
1318	46733	45540	48018	47787	46663	46182	47372	47523	47549	49729	47309.6	2504	1119	1071	1563	1410	1649	1325	1490	1070	1155	1435.6
1319	46899	45720	48190	47946	46830	46366	47560	47698	47718	49933	47486	2515	1123	1077	1568	1417	1652	1330	1494	1073	1158	1440.7
1320	47086	45881	48363	48119	47034	46562	47735	47873	47910	50140	47670.3	2527	1127	1080	1571	1428	1660	1335	1499	1076	1160	1446.3
1321	47276	46068	48572	48303	47210	46728	47918	48054	48064	50353	47854.6	2534	1130	1082	1575	1431	1664	1340	1501	1076	1165	1449.8
1322	47454	46208	48748	48509	47389	46895	48140	48208	48267	50528	48034.6	2539	1133	1085	1581	1433	1668	1343	1501	1081	1170	1453.4
1323	47633	46409	48933	48669	47602	47047	48322	48377	48454	50700	48214.6	2545	1135	1088	1584	1441	1674	1345	1502	1083	1170	1456.7
1324	47794	46585	49114	48856	47776	47242	48485	48530	48650	50900	48393.2	2551	1140	1091	1590	1442	1679	1351	1505	1086	1173	1460.8
1325	47971	46753	49304	49032	47934	47417	48677	48697	48856	51090	48573.1	2559	1142	1096	1595	1446	1685	1354	1512	1091	1175	1465.5
1326	48152	46905	49479	49230	48115	47592	48843	48890	49031	51276	48751.3	2570	1146	1100	1599	1448	1694	1365	1516	1101	1179	1471.8
1327	48318	47090	49680	49425	48312	47767	49002	49060	49206	51469	48932.9	2578	1150	1103	1603	1460	1700	1376	1519	1106	1178	1477.3
1328	48489	47270	49846	49636	48483	47942	49178	49254	49403	51655	49115.6	2587	1155	1109	1611	1466	1703	1383	1526	1108	1183	1483.1
1329	48658	47447	50048	49834	48653	48114	49362	49434	49585	51863	49299.8	2592	1157	1112	1618	1466	1719	1390	1531	1109	1191	1488.5
1330	48862	47613	50226	50040	48828	48295	49535	49618	49743	52081	49484.1	2607	1166	1115	1625	1469	1724	1397	1539	1113	1194	1494.9
1331	49024	47813	50409	50229	49031	48448	49732	49788	49927	52261	49666.2	2611	1169	1118	1634	1477	1731	1404	1545	1121	1197	1500.7
1332	49187	48008	50589	50416	49196	48625	49897	49959	50110	52414	49840.1	2617	1173	1124	1643	1486	1739	1409	1554	1121	1202	1506.8
1333	49399	48209	50798	50608	49396	48806	50081	50134	50303	52613	50034.7	2631	1174	1127	1643	1488	1749	1413	1567	1124	1206	1512.2
1334	49582	48407	50997	50780	49590	49007	50255	50329	50488	52801	50223.6	2637	1179	1133	1655	1490	1759	1414	1571	1131	1212	1518.1
1335	49770	48587	51172	50963	49804	49171	50454	50487	50660	52972	50404	2655	1183	1138	1661	1491	1767	1419	1577	1132	1220	1524.3
1336	49976	48791	51348	51167	50001	49331	50628	50672	50839	53145	50589.8	2661	1184	1140	1666	1499	1777	1425	1585	1137	1223	1529.7
1337	50168	48977	51521	51359	50170	49522	50816	50875	51042	53355	50780.5	2669	1188	1146	1669	1507	1784	1432	1590	1140	1227	1535.2
1338	50362	49125	51714	51546	50351	49708	51017	51055	51230	53548	50965.6	2672	1192	1150	1676	1514	1789	1437	1593	1144	1234	1540.1
1339	50530	49284	51911	51730	50550	49889	51221	51259	51418	53719	51151.1	2684	1197	1155	1679	1518	1793	1445	1599	1147	1236	1545.3
1340	50696	49450	52101	51941	50720	50088	51427	51455	51639	53899	51341.6	2693	1199	1159	1686	1520	1803	1450	1604	1146	1242	1550.2
1341	50905	49631	52298	52113	50929	50243	51605	51652	51826	54092	51529.4	2698	1203	1165	1692	1521	1813	1453	1606	1152	1248	1555.1
1342	51108	49811	52510	52301	51128	50442	51811	51839	52050	54286	51728.6	2712	1215	1169	1694	1529	1815	1461	1613	1154	1251	1561.3
1343	51292	49976	52734	52506	51310	50626	51999	52034	52265	54491	51923.3	2723	1221	1170	1700	1537	1821	1462	1621	1159	1254	1566.8
1344	51490	50161	52931	52683	51480	50796	52202	52213	52434	54705	52109.5	2730	1226	1173	1706	1543	1830	1471	1628	1164	1258	1572.9
1345	51698	50351	53139	52879	51660	50979	52416	52406	52629	54907	52306.4	2735	1232	1176	1710	1549	1830	1472	1633	1169	1263	1576.9
1346	51893	50523	53342	53073	51872	51175	52591	52605	52807	55106	52498.7	2746	1239	1184	1713	1554	1833	1477	1638	1172	1270	1582.6
1347	52074	50718	53550	53260	52057	51385	52758	52824	52992	55302	52692	2752	1248	1185	1719	1562	1842	1482	1638	1176	1272	1587.6
1348	52249	50888	53740	53446	52246	51591	52979	53042	53175	55523	52887.9	2765	1252	1188	1724	1562	1847	1490	1649	1178	1275	1593
1349	52443	51040	53935	53650	52439	51805	53160	53252	53372	55736	53083.2	2773	1258	1190	1732	1565	1850	1498	1651	1181	1279	1597.7
1350	52614	51215	54143	53866	52621	52021	53353	53463	53556	55926	53277.8	2778	1261	1191	1736	1566	1859	1503	1656	1186	1284	1602
1351	52822	51373	54363	54095	52818	52213	53542	53635	53752	56124	53473.7	2785	1263	1195	1743	1571	1869	1510	1662	1188	1289	1607.5
1352	52985	51581	54566	54285	53014	52412	53756	53822	53932	56326	53667.9	2793	1267	1203	1751	1576	1877	1514	1668	1193	1294	1613.6
1353	53156	51772	54762	54470	53201	52595	53955	53980	54150	56527	53856.8	2808	1272	1209	1759	1578	1881	1519	1671	1195	1300	1619.2
1354	53367	51977	54964	54632	53401	52798	54149	54180	54350	56740	54055.8	2820	1278	1214	1765	1587	1888	1525	1674	1197	1304	1625.2
1355	53564	52165	55194	54840	53637	52998	54317	54372	54560	56954	54260.1	2831	1286	1219	1768	1591	1893	1528	1679	1201	1310	1630.6
1356	53750	52367	55395	55067	53850	53178	54533	54584	54770	57179	54467.3	2848	1292	1223	1771	1599	1899	1536	1683	1204	1311	1636.6
1357	53952	52591	55608	55295	54041	53356	54720	54789	54975	57389	54671.6	2858	1297	1226	1779	1607	1904	1539	1687	1208	1313	1641.8
1358	54172	52797	55818	55501	54252	53543	54932	54990	55187	57611	54880.3	2871	1302	1229	1786	1614	1908	1546	1694	1211	1314	1647.5
1359	54401	52972	56004	55731	54461	53750	55114	55195	55384	57810	55082.2	2876	1308	1234	1788	1615	1919	1553	1701	1215	1319	1652.8
1360	54591	53181	56235	55929	54639	53947	55298	55402	55610	58039	55287.1	2888	1313	1236	1793	1618	1927	1560	1706	1221	1326	1658.8
1361	54776	53408	56451	56123	54826	54174	55524	55608	55805	58257	55495.2	2898	1318	1240	1803	1625	1930	1565	1712	1222	1333	1664.6
1362	54976	53600	56642	56314	55016	54379	55751	55804	56004	58465	55695.1	2913	1323	1246	1813	1629	1936	1572	1714	1229	1338	1671.3
1363	55175	53809	56838	56517	55223	54576	55952	56020	56223	58651	55898.4	2925	1330	1250	1821	1633	1946	1575	1718	1233	1346	1677.7
1364	55368	54017	57065	56719	55425	54787	56166	56232	56433	58871	56108.3	2952	1330	1253	1823	1639	1951	1581	1724	1240	1356	1684.9
1365	55582	54213	57275	56932	55628	55012	56369	56439	56630	59103	56318.3	2963	1332	1257	1831	1647	1962	1585	1731	1244	1363	1691.5
1366	55770	54414	57469	57140	55844	55226	56554	56636	56832	59328	56521.3	2981	1338	1262	1842	1650	1964	1594	1735	1249	1366	1698.1
1367	55966	54585	57650	57369	56055	55459	56795	56838	57055	59547	56731.9	2991	1345	1273	1845	1655	1973	1603	1737	1251	1371	1704.4
1368	56170	54789	57893	57546	56225	55648	57011	57036	57289	59771	56937.8	3002	1348	1276	1847	1661	1982	1610	1744	1258	1382	1711
1369	56362	54976	58093	57758	56430	55866	57217	57242	57496	60004	57144.4	3017	1348	1279	1853	1664	1991	1615	1749	1264	1387	1716.7
1370	56564	55180	58320	57961	56642	56070	57404	57459	57726	60229	57355.5	3030	1353	1284	1863	1669	2000	1623	1755	1269	1390	1723.6
1371	56753	55359	58527	58176	56870	56307	57612	57650	57948	60440	57564.2	3046	1357	1286	1867	1670	2013	1627	1761	1272	1393	1729.2
1372	56981	55570	58749	58396	57069	56507	57819	57863	58162	60663	57777.9	3060	1362	1290	1878	1677	2015	1632	1768	1276	1404	1736.2
1373	57180	55781	58944	58578	57257	56742	57999	58085	58360	60903	57982.9	3077	1369	1296	1886	1680	2020	1637	1782	1279	1411	1743.7
1374	57375	55979	59144	58785	57454	56954	58216	58270	58577	61119	58187.3	3087	1374	1302	1896	1684	2026	1648	1783	1287	1414	1750.1
1375	57613	56196	59352	59009	57689	57159	58443	58465	58793	61319	58403.8	3100	1376	1308	1901	1690	2031	1652	1787	1292	1413	1755
1376	57833	56380	59567	59254	57902	57378	58663	58693	59002	61556	58622.8	3117	1382	1313	1906	1694	2034	1657	1794	1298	1416	1761.1
1377	58054	56594	59778	59477	58099	57576	58867	58887	59221	61804	58835.7	3133	1385	1319	1917	1696	2043	1666	1802	1303	1423	1768.7
1378	58254	56785	59995	59693	58293	57825	59075	59141	59442	62017	59052	3146	1391	1320	1922	1699	2050	1669	1810	1312	1422	1774.1
1379	58451	57006	60212	59929	58477	58026	59310	59376	59654	62242	59268.3	3163	1391	1319	1928	1704	2059	1671	1819	1316	1430	1780
1380	58678	57224	60453	60150	58706	58256	59526	59596	59865	62467	59492.1	3173	1394	1325	1928	1711	2070	1678	1826	1322	1434	1786.1
1381	58917	57427	60664	60379	58890	58449	59732	59801	60095	62707	59706.1	3187	1404	1327	1933	1715	2073	1683	1830	1325	1439	1791.6
1382	59142	57645	60912	60610	59113	58672	59968	60060	60333	62977	59943.2	3192	1406	1339	1940	1718	2078	1689	1838	1329	1439	1796.8
1383	59370	57880	61115	60887	59315	58901	60181	60308	60567	63216	60174	3200	1415	1348	1949	1724	2080	1695	1845	1332	1446	1803.4
1384	59585	58093	61312	61131	59518	59121	60400	60536	60800	63443	60393.9	3205	1418	1351	1955	1729	2086	1701	1849	1332	1455	1808.1
1385	59802	58312	61544	61318	59711	59339	60635	60746	61025	63650	60608.2	3218	1420	1357	1962	1736	2097	1708	1854	1339	1456	1814.7
1386	60016	58542	61755	61516	59956	59527	60897	60953	61247	63906	60831.5	3229	1423	1360	1961	1736	2104	1713	1860	1342	1462	1819
1387	60242	58763	61984	61776	60167	59774	61133	61183	61479	64105	61060.6	3245	1428	1365	1968	1742	2114	1716	1863	1347	1468	1825.6
1388	60466	58983	62208	62004	60387	59997	61376	61406	61697	64343	61286.7	3263	1431	1370	1974	1748	2125	1716	1869	1354	1473	1832.3
1389	60701	59185	62458	62242	60617	60223	61599	61643	61919	64611	61519.8	3274	1437	1371	1984	1754	2128	1718	1876	1358	1480	1838
1390	60942	59371	62706	62494	60856	60455	61847	61887	62162	64829	61754.9	3286	1443	1376	1986	1759	2135	1722	1882	1363	1485	1843.7
1391	61167	59613	62925	62717	61094	60725	62112	62125	62387	65034	61989.9	3302	1450	1373	1990	1769	2145	1727	1888	1364	1485	1849.3
1392	61405	59832	63188	62943	61308	60934	62333	62357	62610	65251	62216.1	3320	1455	1375	1997	1776	2149	1732	1893	1366	1487	1855
1393	61633	60079	63413	63196	61521	61181	62564	62588	62848	65522	62454.5	3330	1457	1379	2006	1779	2155	1740	1900	1373	1489	1860.8
1394	61866	60281	63644	63443	61750	61429	62789	62803	63072	65758	62683.5	3346	1461	1388	2013	1780	2159	1740	1910	1377	1491	1866.5
1395	62095	60486	63887	63681	61952	61645	63012	63066	63318	65990	62913.2	3361	1464	1391	2026	1781	2165	1744	1921	1385	1497	1873.5
1396	62302	60696	64126	63943	62192	61863	63251	63301	63543	66237	63145.4	3375	1469	1394	2029	1784	2171	1753	1929	1392	1500	1879.6
1397	62546	60927	64353	64174	62407	62104	63526	63555	63767	66462	63382.1	3385	1471	1403	2033	1789	2182	1764	1934	1401	1501	1886.3
1398	62755	61161	64584	64434	62634	62290	63778	63800	64010	66699	63614.5	3393	1477	1412	2042	1794	2185	1772	1940	1407	1508	1893
1399	62966	61376	64805	64689	62897	62521	64004	64023	64265	66957	63850.3	3412	1484	1413	2046	1799	2193	1777	1950	1412	1513	1899.9
1400	63144	61614	65043	64925	63105	62744	64245	64253	64501	67231	64080.5	3420	1491	1421	2052	1806	2200	1778	1952	1413	1516	1904.9
1401	63361	61848	65282	65158	63307	62949	64484	64512	64724	67469	64309.4	3438	1497	1426	2057	1812	2202	1781	1964	1420	1521	1911.8
1402	63595	62095	65512	65433	63538	63163	64715	64741	64963	67716	64547.1	3457	1501	1436	2063	1819	2206	1785	1971	1422	1524	1918.4
1403	63812	62327	65741	65663	63797	63368	64950	64972	65211	67966	64780.7	3470	1505	1441	2071	1827	2216	1789	1979	1426	1526	1925
1404	64058	62542	66002	65887	64052	63621	65167	65163	65462	68257	65021.1	3498	1512	1445	2081	1830	2219	1798	1987	1430	1527	1932.7
1405	64327	62760	66259	66122	64313	63839	65402	65381	65685	68519	65260.7	3513	1515	1449	2090	1842	2227	1803	1992	1438	1533	1940.2
1406	64551	62998	66526	66351	64516	64051	65637	65618	65980	68775	65500.3	3527	1516	1455	2098	1852	2232	1805	2003	1444	1536	1946.8
1407	64803	63226	66786	66587	64734	64281	65863	65863	66234	69062	65743.9	3540	1522	1462	2103	1858	2239	1813	2007	1446	1542	1953.2
1408	65037	63458	67034	66848	65018	64506	66118	66115	66495	69347	65997.6	3554	1526	1468	2110	1863	2248	1816	2021	1457	1545	1960.8
1409	65268	63695	67311	67134	65271	64724	66388	66351	66716	69616	66247.4	3567	1532	1473	2117	1865	2258	1820	2029	1462	1555	1967.8
1410	65535	63920	67570	67400	65503	64966	66641	66616	66988	69855	66499.4	3581	1534	1483	2121	1874	2264	1829	2037	1469	1558	1975
1411	65770	64158	67811	67653	65745	65190	66890	66860	67250	70097	66742.4	3596	1537	1493	2126	1881	2276	1835	2047	1476	1563	1983
1412	66010	64381	68087	67886	66004	65404	67136	67130	67482	70330	66985	3605	1540	1492	2132	1887	2288	1836	2059	1479	1571	1988.9
1413	66256	64613	68365	68138	66258	65637	67382	67371	67712	70603	67233.5	3621	1548	1499	2137	1899	2296	1843	2065	1483	1577	1996.8
1414	66505	64880	68607	68369	66496	65903	67592	67639	67983	70846	67482	3637	1556	1502	2143	1905	2305	1849	2078	1487	1581	2004.3
1415	66712	65103	68864	68613	66736	66148	67828	67879	68220	71151	67725.4	3646	1561	1507	2153	1908	2308	1854	2085	1494	1588	2010.4
1416	66970	65348	69134	68862	66938	66405	68081	68116	68462	71422	67973.8	3657	1566	1509	2163	1912	2320	1862	2096	1499	1594	2017.8
1417	67217	65599	69397	69110	67184	66631	68368	68361	68704	71699	68227	3673	1568	1516	2166	1914	2327	1866	2100	1502	1595	2022.7
1418	67444	65843	69639	69372	67416	66869	68621	68603	68955	71952	68471.4	3687	1569	1516	2173	1919	2332	1875	2098	1499	1600	2026.8
1419	67698	66053	69876	69629	67660	67110	68865	68855	69214	72224	68718.4	3700	1575	1519	2184	1927	2341	1878	2106	1502	1605	2033.7
1420	67951	66273	70153	69864	67918	67342	69122	69126	69467	72491	68970.7	3724	1577	1526	2191	1935	2348	1878	2110	1503	1605	2039.7
1421	68185	66547	70418	70089	68191	67607	69399	69352	69695	72739	69222.2	3739	1584	1530	2197	1940	2358	1885	2111	1508	1610	2046.2
1422	68447	66775	70694	70334	68450	67860	69646	69607	69973	72961	69474.7	3752	1590	1537	2201	1943	2367	1889	2119	1510	1615	2052.3
1423	68691	67015	70960	70592	68704	68119	69895	69867	70245	73256	69734.4	3763	1592	1541	2208	1947	2373	1895	2125	1514	1617	2057.5
1424	68947	67268	71248	70837	68960	68379	70141	70153	70526	73549	70000.8	3778	1595	1546	2218	1959	2381	1905	2133	1516	1622	2065.3
1425	69222	67522	71527	71085	69218	68620	70400	70410	70795	73834	70263.3	3792	1602	1553	2221	1964	2389	1912	2140	1520	1628	2072.1
1426	69480	67796	71791	71345	69477	68878	70642	70721	71069	74100	70529.9	3810	1605	1558	2232	1967	2395	1919	2147	1522	1631	2078.6
1427	69741	68086	72088	71598	69737	69148	70903	70993	71343	74378	70801.5	3826	1607	1561	2237	1976	2408	1925	2154	1527	1635	2085.6
1428	70026	68332	72349	71863	70006	69382	71141	71246	71611	74645	71060.1	3840	1610	1566	2242	1983	2416	1932	2163	1531	1640	2092.3
1429	70318	68574	72617	72143	70291	69666	71397	71500	71890	74908	71330.4	3851	1618	1572	2246	1987	2422	1936	2171	1539	1645	2098.7
1430	70574	68815	72845	72421	70530	69950	71686	71788	72144	75180	71593.3	3859	1621	1575	2252	1994	2429	1944	2178	1542	1649	2104.3
1431	70813	69059	73131	72691	70797	70220	71975	72080	72407	75433	71860.6	3869	1626	1577	2259	2004	2436	1950	2189	1551	1657	2111.8
1432	71042	69292	73388	72982	71088	70485	72255	72334	72652	75710	72122.8	3884	1626	1585	2272	2009	2440	1958	2197	1557	1663	2119.1
1433	71294	69551	73658	73269	71347	70749	72544	72613	72908	75989	72392.2	3898	1625	1588	2279	2020	2449	1961	2205	1561	1665	2125.1
1434	71572	69806	73944	73521	71626	70977	72779	72875	73180	76286	72656.6	3916	1628	1591	2292	2026	2457	1970	2209	1564	1668	2132.1
1435	71850	70053	74233	73787	71912	71221	73064	73170	73470	76582	72934.2	3925	1635	1595	2303	2034	2460	1977	2217	1567	1677	2139
1436	72137	70322	74484	74048	72155	71495	73339	73461	73737	76874	73205.2	3931	1638	1605	2310	2046	2464	1983	2223	1568	1684	2145.2
1437	72412	70578	74760	74357	72423	71754	73611	73739	74005	77138	73477.7	3948	1645	1613	2316	2049	2470	1986	2227	1574	1689	2151.7
1438	72677	70844	75026	74615	72715	71993	73860	74039	74305	77449	73752.3	3964	1652	1618	2330	2066	2473	1990	2236	1584	1696	2160.9
1439	72940	71102	75305	74874	72978	72289	74137	74309	74571	77741	74024.6	3979	1658	1621	2339	2077	2478	1998	2245	1587	1706	2168.8
1440	73241	71378	75597	75112	73243	72580	74401	74587	74853	78007	74299.9	3989	1662	1623	2350	2083	2486	1999	2255	1593	1710	2175
1441	73492	71648	75865	75382	73532	72815	74675	74876	75122	78301	74570.8	4007	1669	1627	2358	2090	2491	2005	2263	1601	1717	2182.8
1442	73805	71932	76112	75671	73771	73078	74962	75157	75409	78618	74851.5	4025	1682	1633	2370	2096	2500	2014	2269	1605	1724	2191.8
1443	74079	72198	76392	75993	74047	73366	75258	75461	75687	78870	75135.1	4037	1688	1638	2378	2099	2511	2021	2277	1611	1731	2199.1
1444	74348	72480	76672	76289	74324	73644	75531	75742	75983	79163	75417.6	4046	1697	1643	2390	2108	2515	2027	2286	1619	1738	2206.9
1445	74642	72744	76944	76559	74623	73924	75795	76023	76255	79458	75696.7	4053	1702	1650	2404	2119	2523	2031	2297	1628	1744	2215.1
1446	74936	73033	77225	76846	74881	74196	76112	76328	76522	79760	75983.9	4066	1709	1658	2416	2125	2531	2038	2306	1630	1746	2222.5
1447	75228	73319	77498	77140	75167	74444	76395	76634	76807	80058	76269	4084	1714	1661	2421	2134	2542	2041	2311	1634	1747	2228.9
1448	75506	73618	77791	77426	75441	74743	76698	76944	77053	80387	76560.7	4095	1723	1666	2427	2140	2552	2049	2318	1640	1754	2236.4
1449	75770	73874	78090	77726	75727	75027	76982	77220	77315	80706	76843.7	4109	1724	1672	2439	2151	2560	2048	2324	1643	1763	2243.3
1450	76026	74124	78351	78014	75983	75277	77233	77511	77598	81002	77111.9	4132	1730	1677	2443	2164	2572	2052	2328	1647	1770	2251.5
1451	76282	74388	78657	78301	76282	75530	77525	77802	77894	81319	77398	4149	1735	1679	2455	2171	2583	2058	2334	1651	1773	2258.8
1452	76578	74668	78952	78633	76587	75808	77795	78082	78166	81635	77690.4	4159	1742	1690	2457	2178	2591	2065	2343	1658	1777	2266
1453	76824	74945	79242	78915	76875	76095	78099	78401	78448	81953	77979.7	4177	1745	1692	2461	2188	2600	2074	2351	1662	1778	2272.8
1454	77101	75233	79513	79196	77152	76356	78435	78707	78747	82252	78269.2	4186	1749	1699	2463	2189	2607	2082	2360	1669	1779	2278.3
1455	77400	75504	79820	79478	77455	76639	78750	78992	79004	82560	78560.2	4201	1758	1705	2466	2197	2615	2090	2371	1682	1785	2287
1456	77728	75789	80130	79753	77768	76928	79041	79271	79287	82871	78856.6	4220	1763	1708	2476	2199	2625	2097	2379	1687	1788	2294.2
1457	78038	76080	80389	80054	78037	77194	79323	79568	79578	83189	79145	4226	1766	1714	2484	2203	2640	2105	2388	1691	1794	2301.1
1458	78334	76362	80668	80364	78321	77476	79647	79869	79873	83486	79440	4238	1773	1724	2493	2205	2652	2108	2393	1695	1801	2308.2
1459	78624	76661	80952	80659	78630	77785	79947	80171	80166	83790	79738.5	4258	1779	1727	2499	2216	2663	2119	2404	1705	1802	2317.2
1460	78956	76922	81236	80960	78939	78092	80258	80474	80465	84087	80038.9	4273	1785	1731	2505	2229	2670	2123	2411	1712	1811	2325
1461	79253	77196	81548	81252	79248	78386	80569	80778	80768	84385	80338.3	4290	1792	1736	2509	2236	2682	2126	2424	1716	1815	2332.6
1462	79572	77490	81830	81527	79564	78689	80884	81033	81080	84714	80638.3	4304	1794	1742	2515	2244	2688	2135	2432	1723	1817	2339.4
1463	79847	77778	82133	81794	79845	78996	81179	81303	81407	85054	80933.6	4318	1802	1746	2527	2252	2697	2146	2437	1729	1825	2347.9
1464	80144	78079	82459	82126	80116	79331	81475	81617	81713	85373	81243.3	4325	1809	1749	2532	2269	2705	2157	2444	1729	1830	2354.9
1465	80463	78385	82799	82444	80434	79644	81760	81894	82023	85694	81554	4337	1812	1757	2552	2278	2713	2164	2450	1736	1835	2363.4
1466	80760	78658	83111	82744	80748	79952	82069	82206	82350	86023	81862.1	4348	1818	1759	2559	2292	2725	2173	2458	1744	1843	2371.9
1467	81076	78973	83443	83039	81062	80230	82396	82520	82635	86356	82173	4359	1826	1770	2563	2304	2733	2180	2464	1752	1847	2379.8
1468	81389	79271	83754	83346	81370	80528	82695	82830	82936	86670	82478.9	4374	1832	1777	2574	2310	2742	2192	2476	1756	1850	2388.3
1469	81683	79584	84053	83665	81700	80852	82983	83115	83247	87001	82788.3	4400	1844	1782	2588	2315	2747	2199	2485	1760	1854	2397.4
1470	82002	79889	84384	83993	82026	81124	83279	83408	83593	87346	83104.4	4411	1845	1792	2600	2320	2757	2210	2493	1767	1867	2406.2
1471	82299	80166	84695	84311	82311	81420	83584	83710	83904	87672	83407.2	4437	1851	1803	2610	2325	2766	2219	2502	1771	1874	2415.8
1472	82647	80463	85033	84610	82635	81725	83887	84026	84199	88003	83722.8	4458	1861	1811	2619	2330	2770	2227	2509	1776	1876	2423.7
1473	82926	80752	85349	84941	82939	82029	84200	84308	84550	88319	84031.3	4469	1866	1818	2627	2336	2776	2232	2517	1781	1883	2430.5
1474	83220	81056	85670	85231	83241	82344	84508	84627	84846	88649	84339.2	4484	1870	1826	2638	2350	2780	2242	2528	1786	1888	2439.2
1475	83521	81352	85993	85543	83569	82626	84818	84979	85175	88980	84655.6	4498	1879	1831	2645	2354	2786	2248	2538	1789	1894	2446.2
1476	83827	81652	86299	85839	83869	82949	85107	85311	85485	89304	84964.2	4514	1881	1833	2648	2361	2800	2257	2543	1794	1898	2452.9
1477	84126	81967	86614	86191	84188	83296	85440	85600	85808	89651	85288.1	4530	1889	1841	2657	2367	2801	2261	2557	1796	1902	2460.1
1478	84464	82246	86940	86486	84485	83635	85745	85888	86116	89986	85599.1	4549	1894	1846	2667	2373	2806	2262	2568	1799	1907	2467.1
1479	84798	82539	87302	86831	84796	83934	86088	86240	86423	90305	85925.6	4562	1903	1848	2677	2382	2814	2270	2576	1809	1908	2474.9
1480	85117	82843	87619	87141	85099	84231	86404	86556	86759	90681	86245	4577	1911	1858	2683	2388	2814	2279	2581	1812	1917	2482
1481	85427	83173	87936	87481	85423	84542	86710	86878	87094	91039	86570.3	4593	1918	1857	2695	2406	2821	2286	2591	1821	1922	2491
1482	85769	83479	88251	87829	85748	84867	87057	87252	87420	91382	86905.4	4607	1924	1862	2702	2416	2827	2293	2597	1824	1921	2497.3
1483	86083	83814	88557	88149	86061	85205	87408	87586	87737	91736	87233.6	4622	1930	1868	2709	2417	2831	2307	2601	1827	1937	2504.9
1484	86435	84155	88880	88503	86391	85532	87736	87933	88074	92098	87573.7	4630	1936	1874	2724	2427	2839	2320	2612	1833	1951	2514.6
1485	86775	84484	89236	88812	86731	85824	88112	88283	88426	92489	87917.2	4649	1944	1881	2731	2443	2851	2334	2622	1837	1961	2525.3
1486	87085	84816	89575	89174	87071	86125	88433	88589	88731	92836	88243.5	4668	1953	1886	2745	2452	2863	2345	2623	1844	1967	2534.6
1487	87391	85144	89878	89542	87377	86446	88790	88928	89061	93191	88574.8	4693	1965	1887	2745	2461	2875	2351	2631	1854	1974	2543.6
1488	87685	85483	90235	89890	87699	86771	89118	89257	89407	93554	88909.9	4712	1969	1897	2746	2467	2888	2361	2634	1857	1976	2550.7
1489	87995	85803	90593	90215	88037	87096	89456	89553	89745	93900	89239.3	4731	1979	1906	2755	2474	2900	2367	2643	1867	1980	2560.2
1490	88302	86142	90932	90577	88376	87442	89834	89913	90084	94225	89582.7	4746	1989	1910	2760	2482	2909	2375	2655	1879	1992	2569.7
1491	88619	86463	91275	90918	88690	87815	90144	90245	90402	94575	89914.6	4762	1997	1911	2770	2491	2922	2379	2663	1894	2006	2579.5
1492	88947	86766	91623	91295	89014	88162	90459	90575	90713	94944	90249.8	4773	2006	1914	2774	2493	2925	2387	2673	1902	2015	2586.2
1493	89278	87114	91974	91608	89357	88475	90790	90904	91053	95291	90584.4	4789	2014	1920	2788	2493	2940	2396	2679	1903	2022	2594.4
1494	89608	87456	92300	91938	89651	88816	91163	91205	91387	95638	90916.2	4808	2019	1928	2798	2497	2954	2412	2687	1909	2036	2604.8
1495	89928	87798	92652	92287	90001	89141	91526	91503	91723	95968	91252.7	4817	2024	1935	2804	2512	2967	2422	2694	1916	2042	2613.3
1496	90273	88113	93020	92613	90350	89479	91849	91835	92057	96319	91590.8	4836	2029	1943	2812	2518	2975	2432	2706	1921	2055	2622.7
1497	90617	88464	93407	93008	90693	89855	92195	92162	92434	96628	91946.3	4847	2033	1952	2817	2525	2987	2443	2712	1930	2063	2630.9
1498	90944	88782	93747	93367	91091	90164	92576	92534	92763	96983	92295.1	4863	2038	1958	2827	2536	2998	2454	2721	1937	2069	2640.1
1499	91302	89113	94105	93715	91419	90513	92930	92885	93111	97310	92640.3	4880	2046	1961	2834	2543	3004	2459	2730	1944	2081	2648.2
1500	91642	89458	94477	94063	91724	90853	93268	93189	93493	97661	92982.8	4894	2056	1966	2843	2555	3015	2470	2740	1955	2089	2658.3
1501	91961	89798	94839	94443	92088	91181	93615	93521	93852	98024	93332.2	4913	2066	1970	2854	2561	3029	2480	2745	1965	2094	2667.7
1502	92328	90126	95173	94775	92453	91525	93937	93849	94179	98400	93674.5	4935	2077	1976	2864	2573	3038	2489	2755	1969	2096	2677.2
1503	92714	90448	95541	95162	92809	91869	94305	94176	94510	98755	94028.9	4946	2086	1983	2872	2576	3044	2496	2764	1973	2102	2684.2
1504	93075	90790	95938	95513	93138	92198	94651	94532	94857	99128	94382	4961	2093	1989	2885	2583	3050	2508	2772	1976	2117	2693.4
1505	93404	91120	96320	95834	93467	92540	95015	94872	95213	99487	94727.2	4979	2098	1997	2894	2592	3059	2522	2783	1982	2123	2702.9
1506	93738	91433	96668	96223	93844	92867	95373	95230	95606	99896	95087.8	4999	2105	2004	2905	2605	3070	2536	2794	1989	2132	2713.9
1507	94076	91750	97027	96571	94205	93188	95730	95559	95954	100289	95434.9	5018	2112	2010	2916	2614	3078	2547	2799	2002	2140	2723.6
1508	94401	92115	97373	96912	94568	93527	96110	95921	96298	100666	95789.1	5028	2116	2024	2931	2619	3091	2551	2809	2009	2145	2732.3
1509	94737	92479	97763	97242	94963	93869	96438	96252	96639	101037	96141.9	5039	2127	2032	2941	2630	3107	2557	2814	2016	2153	2741.6
1510	95074	92834	98121	97564	95335	94204	96806	96624	96989	101389	96494	5058	2137	2037	2949	2643	3117	2562	2818	2024	2158	2750.3
1511	95416	93148	98486	97948	95687	94551	97143	96971	97353	101746	96844.9	5081	2141	2045	2962	2649	3133	2567	2823	2032	2167	2760
1512	95773	93504	98859	98306	96022	94907	97553	97331	97731	102153	97213.9	5101	2147	2046	2972	2655	3140	2577	2828	2036	2176	2767.8
1513	96081	93823	99190	98677	96375	95281	97905	97660	98059	102494	97554.5	5118	2157	2049	2976	2667	3152	2582	2836	2043	2181	2776.1
1514	96443	94205	99524	99062	96722	95648	98283	98046	98426	102893	97925.2	5137	2166	2055	2981	2675	3168	2590	2842	2045	2183	2784.2
1515	96839	94561	99906	99425	97076	96003	98654	98392	98813	103280	98294.9	5156	2177	2059	2995	2681	3181	2599	2850	2051	2196	2794.5
1516	97189	94911	100290	99797	97433	96370	99022	98780	99184	103686	98666.2	5177	2184	2068	2998	2686	3194	2613	2860	2056	2202	2803.8
1517	97564	95262	100679	100172	97812	96696	99405	99141	99587	104110	99042.8	5199	2186	2075	3006	2692	3204	2622	2870	2059	2214	2812.7
1518	97942	95635	101070	100587	98172	97071	99757	99539	99967	104509	99424.9	5222	2193	2087	3012	2701	3215	2630	2882	2060	2218	2822
1519	98280	95996	101452	100981	98552	97445	100103	99888	100337	104911	99794.5	5240	2201	2092	3030	2710	3225	2643	2890	2068	2221	2832
1520	98662	96368	101821	101358	98914	97807	100444	100270	100730	105284	100166	5263	2210	2096	3035	2721	3234	2645	2896	2075	2230	2840.5
1521	99046	96709	102226	101728	99288	98193	100824	100686	101115	105662	100548	5286	2217	2102	3041	2728	3247	2651	2907	2076	2236	2849.1
1522	99389	97065	102573	102099	99663	98564	101176	101039	101531	106017	100912	5300	2225	2110	3049	2740	3253	2656	2920	2083	2244	2858
1523	99771	97426	102940	102500	100032	98937	101539	101446	101922	106372	101288	5321	2229	2111	3058	2748	3266	2664	2927	2088	2251	2866.3
1524	100137	97801	103326	102908	100435	99301	101926	101824	102300	106761	101672	5339	2241	2123	3067	2758	3281	2680	2940	2093	2258	2878
1525	100500	98155	103708	103264	100810	99657	102313	102226	102682	107177	102049	5358	2246	2130	3078	2771	3285	2688	2952	2101	2266	2887.5
1526	100884	98532	104068	103641	101188	99985	102713	102634	103079	107596	102432	5373	2258	2140	3085	2783	3293	2697	2962	2104	2273	2896.8
1527	101237	98883	104475	104038	101599	100369	103093	103027	103429	107997	102815	5391	2276	2150	3100	2787	3302	2707	2974	2109	2276	2907.2
1528	101579	99224	104834	104415	101968	100717	103432	103406	103814	108432	103182	5415	2284	2153	3112	2797	3313	2710	2980	2113	2283	2916
1529	101969	99597	105230	104781	102349	101112	103819	103783	104192	108860	103569	5432	2290	2157	3125	2801	3317	2723	2990	2117	2297	2924.9
1530	102306	99959	105611	105176	102740	101532	104193	104166	104582	109266	103953	5462	2302	2157	3136	2807	3337	2730	2998	2122	2301	2935.2
1531	102665	100324	106017	105562	103108	101898	104627	104568	104975	109704	104345	5485	2308	2165	3145	2811	3351	2743	3011	2131	2310	2946
1532	103081	100681	106424	105963	103452	102289	105016	104957	105365	110138	104737	5501	2314	2165	3155	2828	3363	2750	3014	2140	2322	2955.2
1533	103445	101077	106821	106350	103811	102668	105423	105318	105744	110534	105119	5520	2322	2172	3161	2839	3379	2757	3026	2146	2335	2965.7
1534	103853	101462	107203	106767	104236	103039	105778	105726	106120	110925	105511	5542	2327	2179	3173	2847	3394	2772	3031	2148	2349	2976.2
1535	104213	101825	107575	107157	104648	103454	106150	106101	106511	111327	105896	5559	2335	2183	3184	2854	3403	2777	3042	2151	2363	2985.1
1536	104613	102181	107956	107540	105023	103843	106554	106504	106907	111708	106283	5578	2341	2196	3197	2863	3419	2786	3047	2156	2373	2995.6
1537	105008	102531	108379	107948	105397	104250	106972	106921	107309	112082	106680	5603	2351	2199	3205	2867	3435	2794	3058	2167	2375	3005.4
1538	105384	102913	108801	108328	105815	104649	107355	107333	107681	112465	107072	5620	2361	2207	3212	2871	3444	2804	3065	2174	2386	3014.4
1539	105766	103283	109194	108754	106216	105035	107737	107710	108045	112893	107463	5641	2364	2216	3223	2877	3454	2812	3083	2182	2392	3024.4
1540	106146	103658	109577	109168	106620	105413	108130	108123	108410	113304	107855	5664	2375	2220	3232	2887	3465	2819	3095	2187	2396	3034
1541	106536	104079	109981	109568	107014	105829	108512	108558	108787	113708	108257	5685	2378	2230	3246	2898	3475	2826	3108	2193	2407	3044.6
1542	106921	104469	110416	109998	107432	106243	108906	108953	109221	114114	108667	5711	2387	2240	3263	2908	3485	2839	3123	2210	2408	3057.4
1543	107390	104837	110835	110401	107794	106655	109297	109352	109604	114540	109070	5739	2392	2245	3271	2913	3497	2849	3129	2225	2416	3067.6
1544	107801	105185	111263	110809	108178	107028	109685	109741	110021	114977	109469	5761	2397	2257	3281	2922	3520	2861	3140	2233	2427	3079.9
1545	108223	105583	111673	111202	108622	107441	110093	110159	110440	115431	109887	5785	2407	2264	3295	2931	3529	2868	3150	2237	2431	3089.7
1546	108627	105999	112066	111610	108991	107823	110487	110535	110825	115839	110280	5811	2411	2274	3305	2940	3544	2873	3157	2244	2441	3100
1547	109044	106388	112445	112040	109397	108209	110901	110960	111210	116240	110683	5838	2427	2286	3323	2941	3549	2885	3167	2252	2453	3112.1
1548	109426	106757	112867	112472	109796	108635	111308	111350	111620	116721	111095	5863	2438	2294	3337	2957	3561	2890	3183	2263	2467	3125.3
1549	109838	107171	113295	112865	110232	109027	111699	111811	112101	117140	111518	5885	2448	2304	3351	2962	3572	2898	3193	2272	2474	3135.9
1550	110223	107580	113730	113293	110678	109416	112138	112231	112532	117610	111943	5911	2457	2317	3356	2970	3586	2912	3205	2277	2477	3146.8
1551	110610	107992	114139	113698	111064	109804	112558	112669	112915	118011	112346	5937	2468	2322	3367	2982	3604	2923	3212	2288	2484	3158.7
1552	111002	108370	114586	114158	111491	110202	112984	113066	113332	118483	112767	5965	2478	2336	3377	2992	3618	2936	3225	2295	2491	3171.3
1553	111422	108759	115020	114590	111909	110608	113439	113483	113745	118891	113187	5995	2485	2340	3391	2996	3631	2941	3237	2303	2501	3182
1554	111833	109153	115449	115013	112308	110991	113871	113901	114126	119320	113596	6015	2490	2348	3399	3002	3644	2946	3247	2309	2514	3191.4
1555	112252	109556	115877	115416	112756	111410	114293	114329	114606	119743	114024	6039	2494	2356	3408	3019	3653	2957	3259	2316	2521	3202.2
1556	112663	109942	116281	115837	113148	111809	114746	114758	115003	120171	114436	6062	2504	2368	3415	3034	3667	2967	3268	2323	2530	3213.8
1557	113094	110336	116683	116258	113579	112201	115185	115193	115393	120602	114852	6092	2515	2381	3427	3043	3680	2974	3278	2328	2538	3225.6
1558	113502	110736	117127	116705	113994	112651	115620	115614	115840	121050	115284	6121	2523	2393	3436	3049	3694	2984	3293	2340	2544	3237.7
1559	113953	111138	117590	117136	114417	113050	116049	116013	116237	121511	115709	6142	2529	2401	3446	3058	3711	2989	3310	2351	2555	3249.2
1560	114393	111560	118038	117551	114837	113488	116482	116426	116657	121959	116139	6167	2532	2407	3463	3074	3733	3004	3321	2361	2565	3262.7
1561	114814	111997	118479	117996	115257	113892	116900	116824	117073	122459	116569	6198	2533	2421	3479	3082	3742	3016	3335	2365	2570	3274.1
1562	115256	112411	118902	118432	115683	114320	117296	117253	117544	122912	117001	6235	2542	2429	3491	3092	3758	3024	3352	2379	2580	3288.2
1563	115714	112818	119333	118868	116117	114771	117728	117702	117988	123376	117442	6269	2552	2432	3499	3105	3774	3037	3364	2392	2593	3301.7
1564	116112	113201	119800	119289	116593	115196	118172	118126	118433	123859	117878	6295	2558	2442	3518	3108	3785	3043	3380	2400	2604	3313.3
1565	116533	113575	120217	119740	117012	115589	118593	118551	118880	124315	118300	6319	2571	2453	3528	3118	3793	3051	3392	2412	2613	3325
1566	116954	114000	120666	120150	117418	116007	119019	118957	119330	124756	118726	6354	2586	2461	3540	3121	3804	3060	3391	2420	2618	3335.5
1567	117350	114403	121114	120616	117851	116401	119480	119368	119777	125205	119156	6381	2602	2471	3555	3127	3813	3066	3404	2437	2625	3348.1
1568	117795	114822	121525	121092	118278	116863	119943	119879	120191	125626	119601	6402	2610	2477	3565	3136	3818	3068	3416	2445	2633	3357
1569	118219	115254	121925	121523	118710	117353	120390	120332	120645	126094	120044	6428	2621	2484	3579	3144	3829	3075	3425	2457	2641	3368.3
1570	118672	115653	122340	121994	119173	117800	120830	120798	121117	126566	120494	6447	2625	2494	3594	3157	3835	3081	3438	2468	2652	3379.1
1571	119162	116044	122822	122440	119593	118240	121305	121252	121582	127021	120946	6475	2637	2500	3602	3164	3853	3088	3447	2472	2670	3390.8
1572	119593	116484	123284	122855	120019	118671	121766	121700	122015	127490	121388	6505	2650	2511	3612	3171	3862	3094	3459	2477	2676	3401.7
1573	120053	116910	123758	123314	120488	119118	122201	122159	122485	127948	121843	6530	2664	2518	3633	3182	3872	3107	3467	2488	2685	3414.6
1574	120492	117354	124196	123818	120917	119549	122660	122614	122931	128447	122298	6561	2667	2531	3649	3190	3882	3119	3483	2497	2691	3427
1575	120953	117779	124678	124262	121342	119975	123146	123070	123455	128907	122757	6590	2684	2541	3664	3208	3893	3134	3496	2502	2706	3441.8
1576	121401	118224	125138	124726	121800	120408	123598	123533	123936	129392	123216	6602	2694	2552	3670	3227	3913	3141	3503	2510	2717	3452.9
1577	121836	118655	125613	125157	122259	120861	124060	123959	124425	129873	123670	6633	2703	2559	3684	3241	3926	3149	3516	2516	2725	3465.2
1578	122311	119112	126027	125580	122662	121356	124505	124432	124914	130369	124127	6657	2714	2570	3701	3251	3943	3158	3524	2519	2728	3476.5
1579	122752	119531	126487	126043	123111	121751	124995	124917	125388	130873	124585	6676	2718	2579	3709	3263	3950	3163	3543	2527	2739	3486.7
1580	123217	119987	126976	126525	123593	122201	125430	125406	125864	131356	125056	6699	2729	2586	3717	3277	3964	3176	3550	2531	2744	3497.3
1581	123698	120443	127463	126979	124029	122611	125895	125869	126314	131848	125515	6724	2740	2595	3734	3287	3976	3187	3561	2542	2747	3509.3
1582	124131	120898	127972	127450	124492	123093	126363	126307	126807	132322	125984	6747	2748	2607	3749	3286	3985	3194	3569	2548	2756	3518.9
1583	124612	121351	128424	127919	124960	123526	126841	126798	127292	132803	126453	6783	2755	2614	3762	3293	4004	3205	3573	2556	2762	3530.7
1584	125061	121827	128886	128385	125416	123961	127316	127222	127790	133282	126915	6820	2767	2622	3776	3300	4015	3216	3588	2560	2762	3542.6
1585	125520	122248	129374	128850	125903	124406	127813	127711	128267	133811	127390	6845	2778	2632	3783	3307	4029	3227	3592	2568	2774	3553.5
1586	125977	122686	129889	129354	126376	124875	128259	128192	128761	134276	127864	6869	2785	2636	3797	3318	4041	3239	3595	2578	2786	3564.4
1587	126481	123158	130396	129848	126825	125310	128723	128630	129255	134752	128338	6896	2794	2650	3799	3326	4056	3251	3603	2584	2791	3575
1588	126964	123596	130860	130339	127335	125764	129191	129131	129706	135263	128815	6929	2805	2657	3809	3334	4062	3260	3615	2595	2800	3586.6
1589	127417	124083	131352	130809	127811	126243	129657	129648	130194	135766	129298	6951	2809	2666	3827	3350	4075	3268	3621	2602	2804	3597.3
1590	127879	124580	131845	131302	128291	126689	130180	130107	130693	136244	129781	6980	2816	2670	3843	3360	4099	3269	3630	2610	2805	3608.2
1591	128359	125048	132328	131770	128744	127197	130666	130599	131206	136759	130268	7007	2825	2681	3851	3370	4120	3282	3638	2621	2813	3620.8
1592	128870	125506	132843	132308	129240	127691	131155	131065	131657	137251	130759	7033	2835	2693	3861	3380	4139	3295	3659	2628	2821	3634.4
1593	129380	125976	133369	132822	129719	128201	131632	131549	132115	137771	131253	7057	2847	2697	3881	3390	4151	3306	3670	2634	2830	3646.3
1594	129897	126413	133835	133335	130241	128651	132104	132048	132606	138246	131738	7080	2854	2700	3892	3407	4174	3316	3680	2648	2840	3659.1
1595	130433	126833	134362	133864	130744	129134	132555	132535	133077	138765	132230	7102	2865	2717	3899	3425	4180	3324	3698	2652	2846	3670.8
1596	130908	127258	134838	134329	131206	129577	133041	133040	133561	139288	132705	7137	2871	2721	3909	3432	4201	3331	3708	2657	2851	3681.8
1597	131369	127777	135343	134834	131668	130026	133535	133585	134067	139785	133199	7170	2876	2732	3924	3449	4213	3335	3732	2669	2859	3695.9
1598	131818	128268	135887	135335	132158	130533	134064	134101	134546	140330	133704	7195	2879	2737	3935	3460	4230	3351	3747	2678	2864	3707.6
1599	132316	128727	136362	135818	132599	130969	134594	134615	135022	140876	134190	7226	2887	2748	3943	3470	4242	3358	3759	2689	2869	3719.1
1600	132814	129226	136867	136313	133097	131486	135112	135112	135523	141408	134696	7247	2893	2761	3958	3486	4255	3366	3769	2699	2880	3731.4
1601	133312	129692	137359	136860	133569	132001	135621	135594	135998	141920	135193	7278	2901	2773	3972	3493	4268	3378	3782	2705	2897	3744.7
1602	133801	130179	137880	137405	134036	132507	136207	136089	136522	142403	135703	7311	2904	2787	3979	3502	4280	3392	3801	2707	2905	3756.8
1603	134285	130656	138419	137879	134549	133008	136706	136623	137034	142980	136214	7333	2909	2792	3995	3514	4299	3402	3818	2720	2911	3769.3
1604	134801	131130	138907	138377	135034	133489	137228	137125	137547	143495	136713	7369	2913	2796	4007	3529	4319	3413	3826	2727	2918	3781.7
1605	135296	131635	139430	138889	135571	134015	137708	137621	138062	144060	137229	7387	2919	2804	4020	3557	4339	3427	3832	2737	2930	3795.2
1606	135802	132101	139929	139402	136059	134501	138228	138125	138621	144630	137740	7422	2926	2812	4039	3573	4350	3434	3847	2749	2932	3808.4
1607	136252	132565	140481	139970	136526	135011	138768	138656	139135	145116	138248	7450	2932	2823	4059	3590	4372	3442	3855	2756	2943	3822.2
1608	136723	133057	140997	140498	137062	135533	139301	139195	139659	145676	138770	7478	2943	2832	4070	3601	4382	3453	3877	2762	2948	3834.6
1609	137195	133548	141564	140982	137590	136012	139792	139736	140153	146222	139279	7497	2957	2834	4080	3619	4401	3473	3887	2773	2956	3847.7
1610	137704	134065	142047	141517	138141	136503	140314	140277	140670	146786	139802	7528	2960	2850	4093	3631	4412	3484	3894	2782	2964	3859.8
1611	138186	134580	142541	142023	138668	136994	140814	140816	141178	147332	140313	7557	2969	2857	4103	3647	4428	3491	3914	2801	2970	3873.7
1612	138763	135067	143068	142539	139143	137503	141312	141357	141731	147925	140841	7583	2981	2864	4112	3658	4438	3500	3927	2809	2974	3884.6
1613	139326	135557	143619	143108	139629	138000	141842	141894	142229	148483	141369	7608	2992	2873	4129	3667	4453	3512	3937	2818	2985	3897.4
1614	139838	136101	144162	143621	140187	138502	142399	142442	142747	149047	141905	7626	2999	2879	4139	3675	4465	3523	3952	2828	2994	3908
1615	140345	136603	144670	144164	140703	139009	142935	142993	143248	149643	142431	7650	3009	2886	4148	3689	4481	3531	3965	2840	3005	3920.4
1616	140909	137078	145243	144676	141254	139531	143471	143533	143752	150186	142963	7676	3026	2894	4167	3700	4490	3545	3983	2845	3012	3933.8
1617	141424	137589	145821	145223	141808	140067	143949	144051	144305	150741	143498	7709	3039	2904	4181	3710	4497	3556	3994	2855	3025	3947
1618	141917	138090	146367	145782	142338	140580	144493	144609	144878	151242	144030	7742	3049	2913	4195	3729	4513	3568	4012	2865	3036	3962.2
1619	142459	138621	146895	146314	142857	141110	145031	145158	145457	151773	144568	7762	3056	2925	4208	3743	4531	3583	4018	2873	3045	3974.4
1620	142953	139103	147441	146827	143359	141684	145588	145672	145998	152427	145105	7798	3067	2930	4231	3755	4540	3591	4033	2882	3056	3988.3
1621	143498	139600	147999	147399	143899	142248	146127	146194	146573	152986	145652	7823	3085	2941	4244	3766	4551	3599	4055	2886	3065	4001.5
1622	144003	140140	148522	147967	144398	142805	146671	146725	147085	153514	146183	7857	3091	2951	4256	3782	4567	3615	4068	2895	3074	4015.6
1623	144574	140679	149030	148512	144921	143363	147201	147281	147653	154054	146727	7888	3103	2961	4265	3797	4586	3630	4084	2897	3084	4029.5
1624	145078	141224	149615	149079	145456	143918	147792	147832	148219	154701	147291	7912	3117	2972	4280	3808	4603	3647	4098	2911	3096	4044.4
1625	145635	141761	150208	149637	145987	144443	148351	148375	148751	155320	147847	7933	3129	2987	4290	3828	4616	3665	4115	2928	3107	4059.8
1626	146178	142262	150773	150168	146533	144998	148926	148936	149298	155888	148396	7964	3137	2992	4308	3838	4632	3671	4124	2939	3115	4072
1627	146740	142785	151379	150703	147072	145509	149448	149498	149884	156468	148949	7993	3151	2997	4319	3851	4653	3686	4144	2945	3126	4086.5
1628	147309	143344	151903	151238	147608	146055	149994	150038	150431	157067	149499	8009	3160	3008	4336	3856	4674	3695	4161	2953	3139	4099.1
1629	147862	143889	152498	151834	148125	146586	150582	150619	151001	157650	150065	8033	3170	3017	4359	3863	4687	3705	4175	2961	3147	4111.7
1630	148444	144426	153032	152408	148733	147147	151195	151197	151549	158241	150637	8061	3174	3040	4367	3872	4696	3714	4183	2969	3159	4123.5
1631	148941	144935	153634	152997	149333	147674	151787	151737	152184	158870	151209	8090	3183	3048	4388	3883	4718	3729	4195	2972	3161	4136.7
1632	149495	145492	154218	153583	149894	148221	152346	152304	152734	159469	151776	8121	3192	3061	4401	3893	4722	3736	4209	2983	3169	4148.7
1633	150016	146056	154818	154164	150452	148783	152933	152894	153307	160066	152349	8147	3202	3066	4410	3910	4734	3749	4223	2993	3183	4161.7
1634	150569	146620	155337	154694	151031	149344	153458	153497	153891	160719	152916	8177	3207	3078	4428	3924	4751	3760	4241	3003	3191	4176
1635	151146	147171	155904	155256	151613	149901	154019	154085	154519	161354	153497	8203	3214	3090	4445	3948	4772	3770	4259	3012	3200	4191.3
1636	151717	147741	156469	155834	152105	150458	154560	154678	155061	161928	154055	8237	3220	3102	4467	3963	4787	3784	4271	3025	3211	4206.7
1637	152248	148322	157024	156408	152636	151001	155120	155290	155651	162537	154624	8267	3231	3113	4482	3975	4806	3796	4288	3033	3221	4221.2
1638	152862	148827	157620	156976	153179	151577	155675	155843	156219	163151	155193	8291	3242	3125	4509	3991	4820	3807	4297	3038	3228	4234.8
1639	153424	149397	158214	157559	153737	152122	156276	156431	156805	163788	155775	8320	3253	3139	4521	4006	4840	3825	4313	3043	3243	4250.3
1640	153977	149990	158814	158160	154279	152708	156839	156972	157393	164398	156353	8343	3264	3150	4531	4014	4848	3842	4327	3050	3256	4262.5
1641	154552	150552	159395	158742	154867	153294	157443	157571	158006	165057	156948	8364	3273	3163	4550	4021	4864	3853	4333	3057	3268	4274.6
1642	155134	151091	159984	159328	155448	153888	158009	158119	158599	165656	157526	8401	3290	3182	4562	4036	4891	3869	4349	3063	3278	4292.1
1643	155699	151674	160548	159921	155988	154492	158576	158677	159169	166261	158100	8427	3296	3193	4583	4054	4903	3890	4368	3076	3287	4307.7
1644	156308	152298	161189	160517	156544	155080	159124	159298	159771	166906	158704	8453	3305	3202	4593	4062	4919	3903	4377	3087	3298	4319.9
1645	156898	152844	161787	161127	157185	155648	159734	159864	160319	167525	159293	8474	3312	3212	4615	4073	4935	3918	4393	3094	3313	4333.9
1646	157502	153390	162345	161753	157773	156231	160343	160470	160865	168081	159875	8498	3325	3222	4624	4089	4956	3929	4407	3108	3312	4347
1647	158064	153971	162958	162317	158359	156814	160973	161059	161470	168742	160473	8524	3332	3241	4643	4100	4970	3948	4424	3119	3317	4361.8
1648	158679	154517	163580	162917	158986	157399	161578	161630	162039	169394	161072	8550	3342	3251	4663	4115	4987	3962	4437	3128	3332	4376.7
1649	159260	155069	164198	163535	159602	158000	162166	162266	162656	170044	161680	8580	3350	3263	4680	4133	5000	3984	4456	3136	3338	4392
1650	159841	155677	164782	164111	160178	158563	162790	162880	163261	170674	162276	8608	3361	3270	4693	4152	5014	3994	4469	3144	3358	4406.3
1651	160398	156292	165389	164724	160744	159164	163387	163456	163828	171315	162870	8640	3373	3280	4715	4162	5024	4004	4477	3152	3372	4419.9
1652	161034	156881	166021	165359	161336	159749	164033	164037	164455	171965	163487	8681	3375	3287	4730	4177	5040	4015	4488	3165	3389	4434.7
1653	161621	157470	166668	165978	161960	160314	164596	164664	165055	172594	164092	8717	3384	3296	4749	4187	5058	4027	4496	3181	3395	4449
1654	162215	158062	167335	166592	162540	160954	165269	165285	165676	173251	164718	8758	3402	3305	4771	4204	5078	4043	4521	3195	3412	4468.9
1655	162848	158644	167929	167204	163151	161569	165882	165885	166299	173907	165332	8784	3412	3317	4789	4214	5088	4052	4543	3209	3424	4483.2
1656	163399	159268	168583	167830	163739	162164	166535	166503	166913	174552	165949	8819	3423	3333	4805	4221	5101	4067	4555	3225	3438	4498.7
1657	163997	159819	169218	168440	164341	162795	167138	167131	167528	175188	166560	8849	3438	3346	4820	4231	5112	4081	4572	3240	3447	4513.6
1658	164609	160466	169856	169098	164974	163427	167766	167750	168181	175802	167193	8889	3449	3359	4839	4242	5124	4087	4588	3246	3458	4528.1
1659	165226	161122	170498	169755	165604	164005	168411	168341	168818	176465	167824	8919	3460	3370	4864	4262	5147	4098	4604	3253	3468	4544.5
1660	165834	161706	171155	170383	166210	164622	168993	168956	169466	177121	168445	8951	3475	3378	4876	4288	5154	4117	4620	3262	3480	4560.1
1661	166510	162327	171804	170997	166847	165254	169608	169598	170098	177757	169080	8981	3487	3385	4885	4301	5181	4134	4632	3268	3497	4575.1
1662	167152	162954	172449	171614	167489	165845	170261	170242	170720	178410	169714	9033	3494	3396	4903	4317	5194	4152	4648	3284	3504	4592.5
1663	167735	163558	173118	172281	168111	166480	170922	170807	171371	179131	170351	9069	3514	3404	4917	4329	5206	4171	4665	3299	3523	4609.7
1664	168351	164172	173754	172910	168759	167134	171583	171435	172081	179814	170999	9110	3527	3415	4931	4342	5225	4187	4692	3310	3530	4626.9
1665	168937	164821	174421	173588	169425	167798	172227	172092	172758	180445	171651	9143	3541	3427	4939	4355	5243	4196	4719	3328	3544	4643.5
1666	169539	165486	175122	174215	170087	168424	172883	172732	173417	181127	172303	9182	3555	3443	4957	4375	5261	4211	4728	3336	3553	4660.1
1667	170164	166110	175765	174850	170746	169050	173560	173370	174024	181749	172939	9208	3565	3461	4968	4391	5274	4221	4747	3350	3559	4674.4
1668	170820	166767	176430	175493	171363	169676	174242	174042	174699	182389	173592	9240	3582	3469	4987	4409	5291	4236	4759	3361	3577	4691.1
1669	171477	167419	177096	176094	171986	170309	174900	174724	175365	183129	174250	9277	3600	3474	5007	4427	5305	4252	4778	3363	3591	4707.4
1670	172153	168044	177748	176759	172642	170916	175538	175299	176018	183806	174892	9304	3615	3482	5025	4444	5327	4274	4790	3369	3608	4723.8
1671	172831	168656	178369	177441	173240	171554	176183	175997	176668	184518	175546	9324	3627	3492	5043	4454	5346	4289	4804	3382	3624	4738.5
1672	173499	169273	178992	178106	173931	172154	176904	176654	177297	185175	176198	9372	3642	3505	5060	4464	5369	4309	4820	3399	3633	4757.3
1673	174118	169969	179649	178721	174613	172816	177568	177334	177915	185869	176857	9397	3652	3514	5083	4483	5385	4325	4836	3409	3643	4772.7
1674	174753	170583	180338	179381	175250	173486	178236	178006	178614	186580	177523	9435	3667	3517	5099	4495	5406	4339	4849	3424	3652	4788.3
1675	175404	171219	181015	180065	175955	174166	178835	178678	179234	187297	178187	9467	3686	3528	5115	4511	5423	4355	4868	3431	3661	4804.5
1676	176033	171867	181672	180755	176590	174789	179469	179391	179855	187970	178839	9500	3697	3535	5129	4527	5436	4371	4886	3456	3675	4821.2
1677	176648	172510	182386	181482	177197	175434	180143	180041	180487	188705	179503	9525	3702	3553	5150	4537	5448	4387	4902	3465	3689	4835.8
1678	177293	173189	183055	182231	177845	176047	180763	180725	181142	189472	180176	9559	3714	3563	5168	4549	5464	4412	4924	3480	3707	4854
1679	177984	173814	183732	182917	178487	176738	181426	181434	181811	190182	180852	9603	3729	3574	5186	4567	5476	4431	4942	3495	3725	4872.8
1680	178629	174472	184464	183602	179199	177385	182074	182079	182500	190879	181528	9632	3744	3577	5203	4585	5494	4461	4951	3505	3734	4888.6
1681	179259	175101	185156	184281	179853	178046	182761	182783	183192	191604	182204	9678	3758	3586	5219	4603	5510	4475	4966	3518	3749	4906.2
1682	179943	175772	185818	185001	180544	178700	183395	183447	183861	192304	182878	9717	3768	3592	5232	4623	5531	4498	4973	3529	3759	4922.2
1683	180569	176421	186492	185693	181225	179309	184019	184131	184521	193034	183541	9741	3778	3599	5257	4642	5548	4510	4990	3543	3777	4938.5
1684	181189	177057	187145	186380	181886	179988	184749	184857	185196	193761	184221	9773	3795	3609	5273	4662	5563	4523	5003	3549	3790	4954
1685	181904	177696	187857	187044	182562	180643	185471	185558	185892	194498	184912	9811	3809	3617	5280	4677	5585	4533	5012	3557	3801	4968.2
1686	182588	178377	188558	187762	183229	181310	186132	186224	186553	195227	185596	9854	3819	3634	5300	4691	5601	4552	5024	3566	3814	4985.5
1687	183298	179059	189273	188504	183942	181999	186867	186933	187222	195955	186305	9895	3829	3649	5324	4703	5628	4566	5047	3574	3822	5003.7
1688	183964	179730	189956	189165	184639	182689	187533	187641	187925	196684	186993	9927	3843	3661	5343	4713	5642	4579	5064	3584	3836	5019.2
1689	184634	180401	190657	189912	185335	183332	188233	188347	188616	197361	187683	9963	3861	3666	5355	4726	5666	4599	5079	3593	3851	5035.9
1690	185325	181077	191354	190591	186076	184020	188863	189119	189278	198120	188382	10009	3878	3680	5354	4746	5688	4615	5098	3599	3870	5053.7
1691	186069	181706	192068	191290	186822	184724	189555	189808	190028	198784	189085	10050	3898	3689	5375	4757	5709	4629	5121	3608	3881	5071.7
1692	186783	182382	192886	192018	187552	185374	190302	190527	190754	199553	189813	10076	3906	3702	5391	4769	5722	4644	5146	3623	3895	5087.4
1693	187471	183104	193605	192743	188265	186024	191001	191212	191489	200261	190518	10117	3924	3711	5412	4779	5749	4661	5163	3629	3913	5105.8
1694	188133	183815	194325	193486	188962	186691	191778	191897	192234	200964	191228	10153	3938	3720	5426	4800	5767	4679	5185	3644	3922	5123.4
1695	188812	184491	195070	194171	189638	187383	192521	192624	192940	201732	191938	10200	3955	3731	5437	4815	5802	4689	5201	3660	3933	5142.3
1696	189492	185136	195823	194872	190306	188111	193235	193356	193665	202480	192648	10240	3968	3744	5444	4833	5825	4704	5215	3677	3947	5159.7
1697	190204	185814	196548	195618	191031	188808	193959	194086	194384	203214	193367	10271	3980	3756	5460	4847	5849	4719	5222	3688	3968	5176
1698	190917	186499	197285	196345	191736	189481	194677	194814	195129	203962	194084	10308	3994	3767	5472	4863	5867	4740	5238	3697	3976	5192.2
1699	191654	187193	198044	197052	192471	190165	195447	195533	195826	204684	194807	10342	4013	3788	5484	4880	5895	4766	5256	3713	3980	5211.7
1700	192398	187891	198811	197762	193190	190840	196166	196244	196553	205452	195531	10388	4034	3795	5505	4896	5913	4795	5280	3725	3988	5231.9
1701	193146	188607	199633	198510	193923	191602	196909	196961	197305	206226	196282	10430	4047	3806	5525	4912	5933	4806	5295	3732	4007	5249.3
1702	193862	189285	200412	199261	194620	192296	197673	197677	198022	207000	197011	10467	4057	3815	5548	4924	5953	4821	5311	3739	4023	5265.8
1703	194549	189986	201130	199986	195365	193021	198429	198388	198827	207755	197744	10497	4072	3826	5565	4944	5966	4836	5318	3754	4037	5281.5
1704	195301	190710	201864	200713	196101	193732	199144	199136	199564	208523	198479	10542	4081	3846	5579	4962	5980	4851	5333	3767	4061	5300.2
1705	196032	191437	202569	201480	196846	194410	199893	199882	200300	209316	199216	10589	4099	3855	5598	4976	6003	4873	5350	3778	4068	5318.9
1706	196808	192118	203330	202214	197641	195124	200641	200628	201058	210050	199961	10636	4111	3873	5616	4994	6025	4897	5368	3788	4085	5339.3
1707	197509	192865	204128	202927	198449	195884	201397	201412	201794	210819	200718	10674	4131	3888	5638	5009	6046	4909	5384	3797	4095	5357.1
1708	198264	193574	204921	203609	199190	196562	202138	202170	202580	211612	201462	10715	4146	3899	5653	5023	6061	4927	5402	3807	4113	5374.6
1709	199019	194296	205656	204404	199939	197329	202931	202939	203376	212447	202234	10750	4159	3913	5670	5039	6079	4939	5410	3818	4130	5390.7
1710	199759	195040	206347	205135	200664	198049	203682	203682	204103	213182	202964	10789	4171	3925	5696	5057	6098	4948	5426	3827	4144	5408.1
1711	200518	195743	207126	205897	201442	198763	204450	204443	204854	213976	203721	10833	4185	3940	5718	5073	6131	4964	5439	3845	4153	5428.1
1712	201334	196416	207880	206623	202222	199476	205210	205169	205604	214802	204474	10880	4197	3957	5738	5094	6155	4980	5455	3862	4164	5448.2
1713	202118	197185	208631	207377	202994	200191	205967	205945	206383	215636	205243	10920	4208	3976	5760	5116	6182	5000	5488	3873	4173	5469.6
1714	202901	197917	209407	208122	203718	200937	206680	206706	207171	216422	205998	10951	4219	3988	5772	5131	6194	5011	5497	3888	4188	5483.9
1715	203676	198689	210227	208926	204454	201681	207461	207428	207908	217266	206772	10989	4225	4007	5794	5147	6208	5027	5510	3902	4205	5501.4
1716	204405	199437	210973	209674	205214	202444	208234	208238	208679	218135	207543	11017	4232	4026	5812	5148	6232	5049	5527	3917	4219	5517.9
1717	205161	200145	211765	210473	206004	203164	209049	208991	209475	218961	208319	11052	4237	4037	5836	5164	6257	5062	5546	3936	4234	5536.1
1718	205946	200841	212522	211258	206729	203950	209791	209757	210246	219795	209084	11098	4258	4049	5860	5177	6278	5082	5575	3948	4254	5557.9
1719	206723	201582	213325	212072	207478	204736	210612	210574	211031	220614	209875	11136	4278	4063	5879	5190	6307	5095	5589	3957	4260	5575.4
1720	207468	202398	214138	212868	208221	205527	211333	211339	211859	221417	210657	11178	4283	4076	5904	5209	6320	5119	5610	3971	4275	5594.5
1721	208224	203139	214908	213641	209010	206290	212114	212101	212607	222328	211436	11213	4308	4087	5923	5222	6336	5137	5628	3979	4292	5612.5
1722	209023	203933	215651	214444	209786	207053	212913	212849	213371	223166	212219	11261	4327	4106	5947	5244	6362	5149	5645	3997	4314	5635.2
1723	209827	204658	216524	215282	210544	207790	213750	213662	214207	223991	213024	11296	4335	4121	5974	5261	6385	5161	5672	4001	4325	5653.1
1724	210596	205390	217309	216074	211345	208568	214567	214404	214966	224744	213796	11346	4356	4143	5995	5274	6407	5185	5686	4022	4343	5675.7
1725	211385	206182	218128	216854	212086	209428	215375	215181	215751	225626	214600	11397	4375	4158	6012	5285	6424	5200	5704	4038	4354	5694.7
1726	212194	206958	218906	217636	212866	210233	216137	215945	216580	226455	215391	11433	4390	4167	6026	5299	6443	5216	5730	4048	4363	5711.5
1727	212963	207701	219681	218469	213684	211022	216962	216785	217408	227233	216191	11468	4402	4179	6040	5313	6472	5227	5762	4061	4384	5730.8
1728	213804	208452	220429	219210	214488	211778	217790	217603	218232	228085	216987	11516	4416	4196	6055	5321	6489	5246	5784	4081	4399	5750.3
1729	214629	209243	221227	220011	215297	212574	218612	218385	218984	228968	217793	11555	4424	4221	6078	5332	6510	5256	5794	4103	4414	5768.7
1730	215468	209970	222015	220827	216067	213375	219436	219226	219754	229766	218590	11610	4443	4237	6099	5354	6532	5272	5817	4121	4430	5791.5
1731	216307	210782	222905	221673	216877	214177	220260	220067	220601	230640	219429	11652	4461	4256	6112	5373	6549	5290	5823	4143	4443	5810.2
1732	217091	211553	223727	222542	217722	214976	221102	220899	221416	231463	220249	11706	4471	4277	6137	5388	6570	5303	5834	4154	4452	5829.2
1733	217920	212288	224561	223365	218572	215766	221932	221786	222169	232362	221072	11749	4478	4293	6153	5411	6595	5321	5854	4165	4461	5848
1734	218729	213039	225429	224236	219375	216581	222746	222610	222976	233197	221892	11796	4490	4315	6184	5431	6613	5336	5878	4178	4481	5870.2
1735	219535	213828	226326	225087	220164	217391	223593	223422	223773	234094	222721	11854	4513	4331	6205	5441	6637	5355	5896	4194	4489	5891.5
1736	220360	214624	227155	225901	220962	218146	224397	224295	224608	234925	223537	11895	4522	4344	6221	5464	6651	5369	5914	4208	4503	5909.1
1737	221211	215484	227955	226758	221835	218956	225252	225165	225464	235777	224386	11949	4533	4359	6235	5484	6679	5386	5946	4220	4521	5931.2
1738	222037	216295	228777	227621	222704	219766	226073	225983	226362	236707	225232	12002	4551	4379	6249	5503	6696	5391	5963	4235	4543	5951.2
1739	222857	217097	229677	228443	223496	220589	226863	226877	227221	237569	226069	12050	4573	4391	6265	5519	6724	5403	5980	4242	4565	5971.2
1740	223675	217900	230533	229329	224382	221397	227723	227756	228061	238482	226924	12090	4591	4409	6276	5534	6740	5419	5998	4260	4581	5989.8
1741	224512	218646	231376	230108	225201	222187	228575	228566	228956	239371	227750	12135	4600	4419	6294	5551	6763	5433	6020	4284	4600	6009.9
1742	225334	219479	232249	230964	226044	223031	229424	229428	229793	240265	228601	12184	4604	4434	6311	5568	6779	5445	6042	4301	4616	6028.4
1743	226196	220280	233093	231820	226878	223844	230297	230214	230617	241216	229446	12223	4617	4449	6339	5586	6797	5460	6059	4314	4631	6047.5
1744	227041	221119	233927	232717	227722	224671	231148	231085	231496	242112	230304	12283	4631	4459	6348	5602	6828	5477	6086	4320	4645	6067.9
1745	227878	221964	234761	233611	228565	225430	232021	231896	232352	242999	231148	12342	4656	4478	6367	5618	6855	5513	6099	4339	4662	6092.9
1746	228744	222761	235598	234461	229394	226268	232944	232771	233217	243891	232005	12390	4668	4493	6387	5635	6887	5531	6118	4353	4680	6114.2
1747	229555	223609	236441	235319	230247	227165	233749	233666	234087	244809	232865	12438	4691	4499	6408	5661	6910	5551	6132	4366	4688	6134.4
1748	230388	224491	237334	236172	231066	228022	234600	234567	234982	245678	233730	12470	4706	4507	6430	5684	6930	5572	6152	4381	4706	6153.8
1749	231272	225320	238225	237089	231919	228857	235486	235379	235865	246593	234600	12512	4721	4524	6450	5712	6955	5588	6167	4405	4719	6175.3
1750	232111	226147	239173	237992	232779	229750	236343	236221	236777	247481	235477	12558	4738	4537	6467	5727	6975	5615	6198	4419	4736	6197
1751	232928	226944	240070	238829	233682	230620	237193	237149	237616	248437	236347	12606	4754	4564	6488	5748	7004	5638	6220	4438	4754	6221.4
1752	233781	227745	240974	239707	234543	231497	238075	238000	238424	249364	237211	12660	4772	4578	6506	5763	7027	5653	6234	4455	4766	6241.4
1753	234650	228573	241895	240533	235420	232384	238969	238922	239359	250242	238095	12716	4787	4589	6530	5777	7056	5669	6248	4467	4775	6261.4
1754	235475	229364	242747	241431	236290	233239	239905	239827	240302	251163	238974	12775	4802	4602	6558	5801	7085	5677	6266	4482	4793	6284.1
1755	236410	230190	243622	242358	237159	234116	240739	240720	241183	252136	239863	12828	4816	4614	6579	5827	7112	5703	6284	4489	4807	6305.9
1756	237327	231018	244466	243271	238035	234988	241630	241579	242061	253081	240746	12876	4830	4628	6602	5846	7136	5720	6307	4502	4816	6326.3
1757	238181	231855	245396	244182	238890	235879	242513	242566	242995	254030	241649	12923	4852	4644	6630	5857	7163	5732	6336	4516	4834	6348.7
1758	239072	232673	246300	245080	239772	236765	243391	243460	243931	254960	242540	12970	4869	4655	6654	5874	7182	5752	6363	4528	4844	6369.1
1759	239963	233511	247223	246008	240676	237610	244295	244371	244831	255903	243439	13028	4890	4675	6682	5890	7205	5767	6370	4544	4863	6391.4
1760	240883	234366	248141	246905	241574	238512	245170	245324	245757	256919	244355	13077	4913	4696	6701	5916	7233	5784	6389	4555	4874	6413.8
1761	241766	235251	249079	247795	242461	239404	246108	246273	246667	257822	245263	13128	4934	4711	6747	5928	7258	5808	6418	4567	4887	6438.6
1762	242674	236117	250058	248763	243377	240259	247086	247178	247584	258802	246190	13178	4953	4726	6759	5948	7272	5828	6440	4586	4899	6458.9
1763	243524	236981	250954	249688	244265	241128	248039	248091	248517	259774	247096	13229	4962	4737	6788	5967	7301	5845	6464	4603	4919	6481.5
1764	244434	237838	251864	250641	245204	242036	248966	249023	249437	260748	248019	13290	4975	4760	6816	5979	7332	5862	6483	4615	4930	6504.2
1765	245352	238696	252794	251594	246138	242988	249911	249940	250426	261698	248954	13347	4992	4779	6836	5996	7354	5887	6508	4626	4941	6526.6
1766	246298	239538	253787	252545	247044	243908	250839	250867	251357	262690	249887	13400	5005	4782	6849	6025	7375	5902	6529	4647	4955	6546.9
1767	247263	240411	254688	253517	247938	244762	251809	251823	252334	263667	250821	13446	5026	4799	6877	6047	7391	5925	6557	4663	4964	6569.5
1768	248210	241314	255618	254437	248836	245698	252775	252712	253265	264693	251756	13498	5035	4822	6903	6060	7421	5946	6579	4672	4977	6591.3
1769	249039	242254	256588	255408	249765	246637	253676	253701	254169	265651	252689	13548	5038	4835	6922	6075	7445	5966	6606	4682	4995	6611.2
1770	249983	243146	257600	256322	250755	247587	254616	254603	255100	266630	253634	13594	5063	4844	6942	6091	7471	5988	6631	4699	5007	6633
1771	250854	244028	258587	257283	251692	248557	255585	255588	256031	267609	254581	13653	5076	4863	6962	6112	7489	6012	6669	4709	5027	6657.2
1772	251729	244944	259538	258230	252612	249441	256569	256511	257043	268553	255517	13709	5085	4873	6990	6127	7512	6026	6692	4737	5046	6679.7
1773	252659	245866	260544	259232	253558	250392	257464	257476	257952	269550	256469	13751	5104	4877	7012	6143	7532	6037	6711	4744	5060	6697.1
1774	253541	246722	261546	260200	254552	251357	258439	258449	258967	270598	257437	13805	5119	4891	7034	6163	7573	6053	6728	4755	5089	6721
1775	254550	247575	262534	261187	255470	252320	259410	259428	259916	271682	258407	13850	5132	4903	7056	6180	7595	6063	6743	4774	5107	6740.3
1776	255493	248478	263514	262179	256459	253218	260379	260374	260868	272716	259368	13896	5150	4920	7075	6206	7615	6084	6759	4785	5122	6761.2
1777	256441	249361	264557	263152	257344	254114	261388	261317	261890	273702	260327	13946	5169	4934	7098	6240	7632	6100	6789	4803	5137	6784.8
1778	257418	250276	265553	264149	258207	255085	262368	262247	262855	274712	261287	13991	5188	4952	7122	6268	7653	6107	6810	4821	5153	6806.5
1779	258407	251235	266501	265175	259153	256050	263332	263251	263887	275725	262272	14040	5207	4959	7154	6291	7687	6117	6831	4846	5164	6829.6
1780	259361	252236	267513	266175	260145	256955	264326	264238	264832	276733	263251	14096	5226	4973	7175	6320	7720	6134	6859	4868	5184	6855.5
1781	260268	253220	268582	267124	261056	257963	265312	265242	265840	277741	264235	14151	5240	4990	7192	6352	7747	6146	6871	4877	5202	6876.8
1782	261287	254213	269625	268147	262067	258988	266276	266210	266812	278732	265236	14215	5252	5007	7226	6377	7767	6162	6906	4899	5224	6903.5
1783	262253	255164	270637	269124	263016	259991	267240	267224	267804	279761	266221	14258	5271	5020	7254	6396	7808	6174	6924	4915	5241	6926.1
1784	263210	256118	271627	270141	263956	260940	268199	268298	268850	280776	267212	14312	5292	5036	7275	6419	7843	6188	6940	4925	5254	6948.4
1785	264138	257019	272676	271162	264994	261911	269184	269295	269866	281832	268208	14360	5311	5053	7307	6438	7871	6217	6954	4937	5267	6971.5
1786	265095	257987	273747	272169	266006	262930	270151	270313	270866	282898	269216	14402	5327	5072	7337	6461	7899	6242	6978	4951	5273	6994.2
1787	266066	258957	274721	273166	267027	263974	271194	271296	271889	283973	270226	14449	5345	5078	7371	6481	7932	6256	7004	4966	5288	7017
1788	267111	259974	275711	274209	268041	265004	272192	272306	272892	284983	271242	14501	5380	5094	7392	6501	7964	6271	7020	4987	5302	7041.2
1789	268098	260900	276688	275242	269086	265941	273239	273331	273944	286056	272252	14544	5391	5106	7420	6528	7984	6295	7031	5000	5319	7061.8
1790	269091	261873	277727	276274	270089	266972	274241	274278	274962	287082	273259	14593	5402	5116	7449	6561	8017	6313	7046	5009	5329	7083.5
1791	270063	262825	278702	277311	271072	267975	275238	275292	275996	288213	274269	14651	5419	5144	7471	6585	8037	6333	7062	5032	5343	7107.7
1792	271015	263777	279696	278364	272110	268960	276215	276331	277006	289243	275272	14705	5432	5158	7500	6608	8065	6359	7081	5043	5361	7131.2
1793	272000	264810	280774	279385	273100	269979	277261	277315	278013	290348	276298	14758	5448	5174	7529	6625	8085	6375	7107	5071	5379	7155.1
1794	273033	265802	281790	280374	274125	270935	278287	278347	279099	291461	277325	14815	5463	5199	7551	6652	8089	6397	7132	5092	5394	7178.4
1795	274060	266745	282844	281419	275109	271980	279351	279335	280123	292556	278352	14871	5477	5222	7574	6675	8114	6417	7156	5112	5418	7203.6
1796	275062	267737	283974	282473	276122	272926	280395	280377	281200	293667	279393	14922	5495	5234	7608	6697	8141	6430	7172	5129	5451	7227.9
1797	276086	268713	285066	283505	277159	273942	281447	281366	282263	294824	280437	14996	5513	5249	7638	6718	8167	6445	7205	5144	5471	7254.6
1798	277139	269614	286169	284626	278180	274933	282512	282420	283304	295946	281484	15061	5521	5264	7668	6743	8189	6463	7230	5153	5493	7278.5
1799	278175	270628	287242	285639	279245	275914	283520	283455	284379	297007	282520	15113	5536	5275	7694	6770	8208	6487	7249	5166	5511	7300.9
1800	279287	271609	288332	286679	280270	276982	284603	284540	285437	298063	283580	15179	5552	5287	7728	6796	8238	6522	7281	5182	5534	7329.9
1801	280256	272596	289428	287757	281331	278021	285631	285559	286473	299164	284622	15233	5576	5308	7749	6816	8262	6550	7309	5193	5553	7354.9
1802	281324	273582	290524	288791	282404	279045	286692	286648	287526	300264	285680	15291	5598	5325	7779	6843	8284	6580	7331	5198	5571	7380
1803	282342	274625	291592	289880	283432	280067	287752	287759	288559	301376	286738	15341	5625	5348	7800	6864	8308	6604	7360	5220	5591	7406.1
1804	283411	275616	292690	290898	284558	281103	288823	288863	289619	302507	287809	15394	5639	5364	7822	6897	8338	6628	7379	5237	5607	7430.5
1805	284438	276677	293833	292050	285614	282157	289903	289952	290733	303624	288898	15450	5662	5376	7846	6917	8364	6655	7400	5253	5619	7454.2
1806	285481	277708	294909	293088	286715	283220	291005	291052	291757	304801	289974	15517	5684	5396	7866	6940	8391	6687	7428	5267	5643	7481.9
1807	286485	278760	295957	294238	287783	284311	292090	292119	292824	305912	291048	15577	5706	5409	7894	6969	8426	6706	7449	5288	5661	7508.5
1808	287500	279829	297114	295364	288826	285382	293153	293211	293957	307007	292134	15626	5728	5427	7920	6999	8459	6725	7477	5313	5677	7535.1
1809	288558	280936	298217	296483	289884	286451	294222	294315	295030	308185	293228	15677	5757	5450	7946	7021	8485	6743	7492	5328	5693	7559.2
1810	289634	282085	299413	297547	290956	287572	295299	295439	296164	309324	294343	15732	5781	5476	7970	7048	8508	6762	7509	5340	5718	7584.4
1811	290718	283146	300603	298684	292025	288643	296460	296540	297268	310437	295452	15775	5790	5488	7997	7069	8536	6779	7523	5360	5731	7604.8
1812	291739	284197	301703	299860	293099	289699	297590	297671	298425	311605	296559	15837	5808	5507	8028	7087	8572	6797	7545	5377	5746	7630.4
1813	292801	285284	302807	300995	294168	290735	298691	298795	299519	312721	297652	15889	5820	5523	8056	7115	8602	6824	7582	5397	5765	7657.3
1814	293897	286413	303932	302168	295289	291852	299806	299940	300602	313857	298776	15952	5844	5546	8088	7140	8634	6850	7602	5410	5783	7684.9
1815	294924	287427	305106	303375	296383	292909	300941	301054	301754	314994	299887	15999	5862	5569	8113	7159	8659	6872	7626	5424	5804	7708.7
1816	296041	288533	306254	304538	297508	294031	302009	302159	302828	316147	301005	16053	5876	5585	8143	7188	8695	6898	7654	5442	5824	7735.8
1817	297111	289588	307396	305651	298625	295121	303148	303288	303997	317305	302123	16110	5893	5598	8176	7213	8729	6920	7683	5464	5845	7763.1
1818	298174	290667	308572	306732	299718	296242	304210	304388	305140	318529	303237	16160	5919	5616	8198	7249	8760	6943	7705	5478	5867	7789.5
1819	299268	291776	309740	307881	300827	297341	305331	305590	306234	319735	304372	16220	5941	5628	8224	7272	8780	6966	7738	5489	5894	7815.2
1820	300381	292910	310849	309024	301897	298516	306491	306735	307408	320969	305518	16274	5958	5642	8246	7295	8811	6999	7754	5501	5918	7839.8
1821	301469	294053	312015	310171	303057	299619	307647	307982	308509	322177	306670	16328	5976	5660	8275	7320	8854	7028	7775	5516	5940	7867.2
1822	302642	295179	313174	311367	304124	300718	308739	309097	309674	323383	307810	16391	5992	5673	8296	7333	8890	7056	7806	5531	5963	7893.1
1823	303782	296340	314363	312522	305303	301826	309966	310246	310856	324593	308980	16435	6010	5688	8319	7356	8920	7077	7832	5549	5987	7917.3
1824	304899	297472	315519	313683	306431	302997	311122	311414	312015	325769	310132	16488	6022	5717	8357	7377	8952	7101	7866	5561	6003	7944.4
1825	306069	298536	316702	314864	307608	304132	312272	312572	313142	326970	311287	16533	6037	5737	8393	7395	8982	7127	7889	5569	6031	7969.3
1826	307204	299626	317893	316033	308772	305288	313469	313742	314291	328167	312448	16597	6059	5765	8415	7426	9002	7156	7914	5582	6054	7997
1827	308360	300703	319061	317231	309923	306408	314644	314864	315513	329328	313604	16650	6080	5782	8438	7441	9046	7176	7942	5599	6075	8022.9
1828	309514	301822	320271	318464	311094	307540	315830	316025	316699	330519	314778	16710	6103	5798	8472	7471	9071	7199	7975	5612	6097	8050.8
1829	310620	302988	321440	319575	312265	308653	317067	317152	317881	331802	315944	16797	6123	5817	8497	7503	9100	7225	8000	5630	6115	8080.7
1830	311795	304129	322652	320685	313438	309828	318221	318392	318997	333092	317123	16870	6142	5836	8526	7531	9131	7254	8035	5644	6135	8110.4
1831	312919	305273	323900	321832	314629	310974	319373	319577	320169	334376	318302	16936	6164	5855	8555	7561	9174	7280	8059	5658	6152	8139.4
1832	314072	306435	325076	323020	315807	312109	320555	320733	321339	335672	319482	17001	6177	5871	8583	7577	9199	7315	8092	5676	6173	8166.4
1833	315190	307581	326233	324209	316941	313233	321712	321946	322518	336972	320654	17068	6200	5892	8606	7606	9239	7346	8107	5692	6195	8195.1
1834	316368	308679	327436	325365	318059	314393	322848	323085	323697	338237	321817	17136	6213	5915	8633	7636	9267	7379	8131	5721	6217	8224.8
1835	317540	309901	328655	326629	319261	315613	324046	324323	324883	339489	323034	17211	6233	5935	8665	7664	9302	7402	8148	5736	6245	8254.1
1836	318729	311128	329894	327822	320487	316733	325239	325559	326059	340736	324239	17292	6255	5949	8694	7699	9335	7430	8178	5751	6258	8284.1
1837	319922	312281	331116	329015	321666	317926	326489	326794	327251	342052	325451	17367	6285	5972	8746	7727	9356	7469	8212	5773	6280	8318.7
1838	321141	313497	332392	330327	322782	319117	327699	328007	328406	343364	326673	17422	6303	6000	8786	7756	9385	7500	8244	5788	6297	8348.1
1839	322347	314677	333586	331572	324005	320252	328878	329198	329624	344576	327872	17480	6324	6025	8831	7785	9411	7531	8267	5818	6322	8379.4
1840	323611	315875	334836	332795	325155	321445	330158	330357	330873	345862	329097	17541	6347	6047	8858	7802	9442	7563	8291	5829	6339	8405.9
1841	324830	317054	336134	334077	326428	322607	331372	331593	332099	347191	330338	17604	6363	6065	8897	7823	9477	7582	8325	5850	6362	8434.8
1842	326092	318266	337346	335351	327655	323803	332636	332854	333358	348419	331578	17673	6392	6081	8934	7847	9505	7606	8352	5867	6384	8464.1
1843	327293	319531	338644	336668	328813	325013	333857	334029	334573	349716	332814	17751	6418	6098	8962	7867	9532	7639	8378	5894	6412	8495.1
1844	328507	320734	339902	337909	330050	326227	335087	335239	335871	351040	334057	17812	6432	6126	8983	7890	9554	7658	8400	5910	6447	8521.2
1845	329780	321944	341153	339223	331290	327520	336355	336534	337066	352397	335326	17876	6458	6154	9008	7923	9579	7681	8429	5936	6471	8551.5
1846	330996	323151	342399	340470	332515	328698	337680	337829	338350	353712	336580	17938	6489	6177	9036	7949	9607	7710	8468	5957	6493	8582.4
1847	332245	324408	343643	341700	333789	329893	338913	339097	339689	355016	337839	18003	6516	6209	9073	7987	9631	7730	8495	5977	6511	8613.2
1848	333464	325552	344936	342991	335014	331164	340212	340324	340915	356360	339093	18072	6535	6225	9107	8021	9665	7761	8517	6005	6529	8643.7
1849	334686	326778	346290	344261	336334	332405	341534	341632	342185	357696	340380	18146	6556	6233	9132	8047	9685	7783	8545	6028	6549	8670.4
1850	335997	327996	347553	345593	337575	333614	342801	342906	343435	359049	341652	18224	6572	6256	9160	8072	9708	7811	8570	6046	6578	8699.7
1851	337309	329221	348892	346887	338804	334890	344125	344232	344716	360398	342947	18299	6590	6271	9193	8094	9734	7828	8594	6068	6594	8726.5
1852	338596	330417	350182	348141	340104	336129	345356	345578	346011	361756	344227	18364	6615	6297	9218	8107	9767	7856	8617	6086	6613	8754
1853	339888	331720	351448	349378	341406	337400	346607	346905	347324	363025	345510	18423	6642	6328	9251	8135	9793	7885	8648	6105	6644	8785.4
1854	341079	332990	352783	350686	342707	338626	347884	348172	348603	364371	346790	18511	6659	6345	9274	8157	9831	7905	8685	6127	6664	8815.8
1855	342365	334225	354032	352008	344003	339899	349181	349464	349961	365702	348084	18592	6674	6362	9312	8179	9864	7932	8726	6151	6684	8847.6
1856	343614	335448	355337	353273	345300	341151	350525	350778	351247	367160	349383	18668	6690	6381	9344	8203	9899	7956	8751	6171	6706	8876.9
1857	344882	336689	356657	354599	346614	342439	351825	352150	352504	368535	350689	18742	6705	6405	9362	8221	9941	7990	8777	6205	6732	8908
1858	346158	337923	358082	355937	347953	343722	353156	353466	353818	369918	352013	18802	6727	6421	9400	8250	9978	8021	8819	6222	6746	8938.6
1859	347438	339210	359446	357249	349256	345009	354488	354778	355135	371261	353327	18866	6748	6436	9431	8282	10016	8046	8850	6250	6773	8969.8
1860	348745	340507	360809	358575	350533	346357	355879	356106	356357	372716	354658	18928	6770	6462	9466	8312	10046	8072	8886	6271	6796	9000.9
1861	350027	341740	362120	359899	351838	347660	357245	357497	357694	374106	355983	18991	6792	6485	9492	8342	10087	8096	8920	6294	6819	9031.8
1862	351361	342961	363529	361237	353125	348906	358583	358756	359043	375544	357304	19049	6817	6504	9526	8369	10121	8133	8948	6311	6839	9061.7
1863	352608	344219	364920	362618	354422	350240	359975	360075	360365	376999	358644	19106	6839	6525	9553	8400	10161	8164	8987	6326	6870	9093.1
1864	353921	345518	366296	363877	355694	351581	361295	361376	361763	378410	359973	19165	6855	6543	9583	8430	10201	8189	9018	6346	6901	9123.1
1865	355212	346839	367660	365227	357021	352889	362582	362756	363146	379749	361308	19239	6880	6576	9608	8449	10236	8220	9050	6363	6915	9153.6
1866	356524	348184	369035	366589	358388	354136	363905	364166	364549	381210	362669	19317	6898	6597	9646	8474	10269	8255	9093	6382	6930	9186.1
1867	357817	349502	370400	367946	359723	355430	365278	365534	365948	382648	364023	19391	6927	6616	9679	8510	10303	8286	9123	6403	6956	9219.4
1868	359186	350820	371808	369308	361038	356729	366610	366912	367260	384129	365380	19461	6954	6639	9702	8550	10332	8328	9158	6418	6980	9252.2
1869	360545	352092	373116	370730	362353	358050	367916	368283	368732	385516	366733	19535	6988	6660	9732	8574	10363	8371	9198	6437	6998	9285.6
1870	361836	353381	374489	371996	363670	359399	369318	369602	370191	386968	368085	19604	7009	6674	9759	8600	10408	8410	9229	6458	7024	9317.5
1871	363076	354704	375852	373414	364985	360727	370765	371000	371545	388441	369451	19684	7024	6684	9791	8623	10446	8435	9256	6479	7043	9346.5
1872	364476	355971	377230	374773	366357	361993	372093	372353	372917	389829	370799	19745	7051	6712	9831	8646	10470	8460	9284	6518	7066	9378.3
1873	365879	357286	378648	376186	367786	363345	373505	373730	374222	391266	372185	19801	7076	6738	9859	8673	10499	8492	9330	6544	7089	9410.1
1874	367246	358633	380052	377609	369150	364751	374922	375098	375600	392742	373580	19884	7094	6759	9886	8701	10539	8520	9362	6562	7113	9442
1875	368641	359984	381497	379043	370500	366164	376302	376543	376995	394189	374986	19947	7120	6778	9912	8734	10564	8551	9387	6587	7147	9472.7
1876	369924	361341	382916	380489	371896	367569	377719	377931	378441	395569	376380	20014	7145	6798	9933	8761	10597	8577	9404	6608	7172	9500.9
1877	371425	362704	384357	381903	373332	368917	379152	379395	379904	397068	377816	20105	7171	6820	9966	8790	10632	8614	9432	6627	7192	9534.9
1878	372879	364073	385733	383335	374728	370343	380531	380756	381320	398523	379222	20183	7195	6838	9999	8813	10662	8645	9451	6651	7208	9564.5
1879	374340	365419	387185	384708	376143	371718	381992	382176	382712	400003	380640	20264	7223	6862	10032	8858	10695	8673	9481	6679	7235	9600.2
1880	375712	366782	388635	386173	377535	373131	383475	383611	384140	401537	382073	20349	7249	6874	10070	8884	10743	8713	9511	6698	7253	9634.4
1881	377115	368108	390075	387537	379014	374533	384868	385053	385507	403034	383484	20425	7274	6897	10105	8914	10769	8743	9550	6716	7278	9667.1
1882	378482	369502	391513	388936	380418	375887	386340	386444	387011	404578	384911	20505	7293	6914	10137	8949	10794	8771	9577	6735	7314	9698.9
1883	379950	370835	392966	390379	381819	377298	387841	387907	388380	406044	386342	20591	7313	6936	10176	8980	10830	8798	9613	6768	7349	9735.4
1884	381304	372247	394376	391882	383280	378690	389306	389376	389857	407517	387784	20657	7342	6961	10202	9013	10862	8828	9652	6809	7374	9770
1885	382708	373616	395853	393280	384701	380037	390726	390788	391349	409031	389209	20739	7368	6988	10231	9029	10903	8855	9686	6833	7402	9803.4
1886	384141	375050	397322	394667	386138	381471	392200	392205	392808	410565	390657	20825	7385	7018	10274	9062	10933	8884	9712	6853	7428	9837.4
1887	385573	376495	398915	396133	387637	382905	393606	393670	394253	412166	392135	20890	7413	7045	10296	9088	10962	8910	9736	6877	7455	9867.2
1888	387006	377856	400332	397525	389157	384306	395083	395220	395697	413656	393584	20957	7443	7072	10320	9104	10995	8944	9770	6896	7474	9897.5
1889	388455	379250	401749	398996	390680	385722	396544	396740	397127	415274	395054	21051	7466	7090	10352	9123	11032	8969	9790	6914	7497	9928.4
1890	389987	380660	403247	400447	392143	387132	397967	398256	398593	416847	396528	21131	7486	7119	10383	9175	11069	8996	9822	6940	7517	9963.8
1891	391504	382026	404748	401988	393554	388603	399477	399813	400098	418409	398022	21212	7515	7143	10421	9190	11117	9040	9857	6968	7543	10000.6
1892	393002	383437	406204	403486	395009	390015	400962	401310	401648	419965	399504	21298	7547	7168	10441	9216	11151	9073	9890	6990	7568	10034.2
1893	394418	384862	407774	405009	396476	391461	402503	402817	403175	421578	401007	21364	7575	7191	10462	9251	11183	9113	9914	7001	7585	10063.9
1894	395888	386232	409263	406504	397965	392903	404019	404305	404660	423211	402495	21448	7596	7212	10501	9272	11217	9143	9943	7029	7618	10097.9
1895	397364	387698	410771	407974	399370	394288	405513	405785	406177	424782	403972	21547	7626	7252	10529	9308	11248	9176	9973	7058	7659	10137.6
1896	398845	389169	412297	409580	400906	395800	407068	407351	407685	426394	405510	21622	7654	7273	10562	9332	11285	9205	10015	7074	7694	10171.6
1897	400357	390629	413846	411131	402361	397204	408624	408857	409196	427965	407017	21704	7685	7291	10602	9357	11317	9221	10037	7098	7731	10204.3
1898	401856	392052	415419	412679	403947	398668	410182	410398	410717	429518	408544	21785	7710	7316	10633	9382	11358	9240	10071	7114	7764	10237.3
1899	403398	393400	416991	414329	405382	400100	411772	411924	412220	431116	410063	21861	7737	7337	10667	9421	11387	9268	10098	7132	7788	10269.6
1900	404899	394890	418579	415782	406896	401610	413331	413429	413746	432705	411587	21950	7775	7369	10718	9439	11412	9291	10128	7160	7821	10306.3
1901	406352	396361	420153	417334	408409	403082	414867	414943	415349	434348	413120	22032	7807	7401	10766	9471	11460	9318	10161	7185	7850	10345.1
1902	407879	397767	421690	418952	409948	404642	416426	416504	416847	435983	414664	22103	7829	7427	10796	9504	11503	9370	10188	7209	7875	10380.4
1903	409343	399192	423283	420522	411538	406194	417928	418124	418426	437611	416216	22181	7846	7458	10826	9535	11534	9405	10218	7230	7901	10413.4
1904	410819	400636	424885	422130	413023	407674	419461	419674	420025	439273	417760	22277	7869	7480	10862	9572	11573	9437	10238	7252	7929	10448.9
1905	412315	402149	426450	423754	414557	409217	421031	421202	421512	440931	419312	22363	7887	7509	10898	9610	11615	9455	10272	7279	7946	10483.4
1906	413787	403622	428107	425301	416111	410683	422607	422770	423044	442540	420857	22456	7909	7550	10929	9620	11647	9496	10318	7302	7966	10519.3
1907	415373	405236	429717	426928	417718	412204	424130	424310	424592	444131	422434	22563	7934	7583	10964	9663	11679	9525	10347	7330	8001	10558.9
1908	416979	406764	431352	428527	419240	413740	425668	425905	426150	445772	424010	22655	7962	7608	11014	9697	11711	9560	10371	7354	8023	10595.5
1909	418525	408292	432990	430171	420780	415260	427318	427570	427765	447411	425608	22728	7991	7636	11047	9729	11762	9592	10418	7376	8055	10633.4
1910	420081	409867	434608	431723	422329	416841	428936	429221	429379	449161	427215	22798	8021	7668	11077	9762	11809	9618	10456	7400	8085	10669.4
1911	421665	411386	436192	433311	423899	418412	430551	430808	430916	450870	428801	22894	8039	7685	11118	9794	11833	9656	10499	7427	8108	10705.3
1912	423238	412923	437840	434939	425502	419996	432065	432350	432570	452595	430402	22989	8065	7709	11169	9824	11880	9684	10528	7455	8138	10744.1
1913	424765	414427	439433	436520	427169	421544	433620	433960	434107	454321	431987	23084	8103	7736	11211	9851	11909	9723	10559	7473	8169	10781.8
1914	426363	415990	441031	438090	428796	423082	435222	435550	435744	456038	433591	23161	8126	7757	11252	9872	11947	9765	10590	7494	8206	10817
1915	427946	417526	442635	439746	430321	424659	436813	437166	437396	457727	435194	23245	8148	7779	11286	9907	11989	9802	10619	7525	8229	10852.9
1916	429499	419100	444206	441377	431933	426235	438490	438885	439034	459487	436825	23327	8172	7803	11326	9939	12025	9836	10649	7547	8251	10887.5
1917	431096	420536	445800	443014	433493	427783	440146	440422	440644	461235	438417	23396	8198	7819	11357	9973	12070	9866	10686	7574	8273	10921.2
1918	432644	422119	447527	444649	435173	429334	441758	442043	442349	462967	440056	23475	8220	7841	11385	10007	12113	9897	10725	7593	8305	10956.1
1919	434340	423701	449182	446370	436756	430884	443445	443540	443952	464698	441687	23561	8255	7859	11429	10045	12148	9921	10756	7610	8325	10990.9
1920	435957	425292	450823	448054	438339	432585	445075	445125	445643	466361	443325	23659	8279	7883	11461	10078	12195	9948	10801	7627	8345	11027.6
1921	437551	426827	452535	449766	440030	434188	446765	446859	447245	468086	444985	23741	8311	7912	11497	10107	12246	9973	10847	7647	8375	11065.6
1922	439180	428393	454231	451472	441643	435842	448381	448535	448910	469781	446637	23836	8335	7950	11520	10127	12301	10008	10889	7679	8406	11105.1
1923	440812	429976	455907	453162	443244	437524	450033	450210	450559	471513	448294	23934	8369	7983	11555	10166	12333	10046	10930	7706	8436	11145.8
1924	442368	431560	457564	454791	444821	439138	451751	451899	452221	473344	449946	24032	8404	8009	11589	10200	12374	10079	10963	7731	8463	11184.4
1925	444040	433182	459240	456486	446427	440829	453472	453540	453891	475086	451619	24120	8429	8051	11617	10231	12414	10115	11001	7762	8481	11222.1
1926	445732	434801	460875	458226	448049	442477	455150	455204	455547	476834	453290	24207	8448	8074	11663	10259	12459	10145	11045	7782	8517	11259.9
1927	447503	436398	462592	459990	449747	444162	456866	456922	457249	478572	455000	24297	8471	8102	11701	10299	12505	10168	11091	7804	8550	11298.8
1928	449145	438016	464372	461700	451361	445841	458599	458600	458943	480448	456702	24383	8501	8134	11745	10335	12542	10196	11145	7827	8580	11338.8
1929	450856	439669	466112	463518	453121	447401	460228	460295	460626	482198	458402	24484	8530	8172	11781	10359	12578	10225	11181	7854	8602	11376.6
1930	452584	441348	467889	465107	454796	449113	461978	461968	462339	483998	460112	24578	8557	8204	11831	10402	12619	10257	11237	7873	8624	11418.2
1931	454254	443027	469672	466750	456517	450803	463730	463686	463995	485867	461830	24656	8580	8233	11890	10422	12654	10288	11273	7905	8644	11454.5
1932	455979	444669	471450	468493	458250	452449	465511	465436	465807	487679	463572	24749	8607	8262	11925	10456	12693	10319	11320	7924	8672	11492.7
1933	457649	446345	473186	470215	459972	454117	467250	467167	467496	489429	465283	24848	8636	8298	11963	10483	12745	10353	11365	7927	8711	11532.9
1934	459380	447990	474942	472014	461666	455840	469002	468875	469255	491312	467028	24927	8664	8315	11996	10515	12774	10395	11397	7959	8736	11567.8
1935	461085	449656	476702	473744	463454	457576	470790	470681	471050	493079	468782	25029	8697	8335	12038	10537	12823	10434	11440	7989	8756	11607.8
1936	462795	451349	478459	475488	465162	459253	472579	472469	472945	494904	470540	25136	8720	8356	12068	10569	12872	10466	11474	8021	8788	11647
1937	464609	453022	480212	477354	466878	460948	474328	474266	474787	496703	472311	25237	8751	8380	12110	10616	12914	10491	11514	8049	8807	11686.9
1938	466403	454781	481995	479171	468570	462672	476097	475938	476652	498444	474072	25318	8789	8401	12149	10653	12958	10514	11535	8070	8821	11720.8
1939	468087	456435	483828	480934	470384	464469	477898	477678	478481	500329	475852	25433	8818	8427	12189	10675	13006	10552	11582	8091	8843	11761.6
1940	469905	458117	485615	482754	472158	466182	479667	479522	480268	502202	477639	25521	8832	8454	12223	10714	13058	10589	11621	8121	8867	11800
1941	471679	459852	487479	484573	473995	467871	481494	481322	482045	504108	479442	25597	8859	8465	12261	10748	13094	10617	11653	8142	8886	11832.2
1942	473514	461532	489242	486424	475703	469681	483240	483191	483801	505934	481226	25690	8873	8489	12305	10777	13135	10651	11708	8180	8920	11872.8
1943	475313	463304	491036	488311	477408	471546	484941	485002	485585	507801	483025	25801	8906	8529	12352	10822	13176	10689	11749	8205	8947	11917.6
1944	477081	464999	492888	490177	479253	473294	486808	486850	487424	509698	484847	25883	8943	8551	12392	10853	13230	10725	11799	8231	8963	11957
1945	478859	466712	494757	491978	481082	475111	488624	488654	489247	511698	486672	25975	8980	8588	12443	10890	13268	10760	11829	8263	8988	11998.4
1946	480542	468425	496607	493764	482930	476896	490513	490502	491093	513596	488487	26074	9007	8613	12485	10927	13310	10791	11873	8295	9018	12039.3
1947	482350	470181	498417	495558	484735	478700	492279	492338	492906	515531	490300	26177	9029	8644	12519	10966	13348	10823	11922	8322	9036	12078.6
1948	484114	471959	500276	497370	486556	480443	494144	494179	494765	517466	492127	26266	9059	8674	12559	11006	13392	10851	11960	8348	9068	12118.3
1949	485872	473719	502184	499295	488325	482214	496000	496055	496542	519374	493958	26344	9098	8691	12601	11045	13433	10888	11995	8379	9094	12156.8
1950	487746	475468	504029	501114	490196	484039	497827	497926	498358	521295	495800	26433	9136	8716	12635	11086	13484	10925	12028	8398	9124	12196.5
1951	489586	477319	505983	503013	492022	485851	499686	499846	500231	523273	497681	26512	9160	8745	12683	11105	13528	10958	12072	8421	9156	12234
1952	491321	479117	507927	504930	493844	487636	501596	501669	502090	525170	499530	26604	9196	8762	12733	11133	13593	10987	12089	8446	9188	12273.1
1953	493175	481014	509824	506676	495796	489523	503463	503580	504055	527152	501426	26703	9225	8797	12768	11181	13646	11037	12128	8486	9219	12319
1954	495056	482799	511722	508509	497637	491377	505354	505349	505967	529171	503294	26815	9251	8830	12817	11227	13699	11063	12159	8515	9259	12363.5
1955	496855	484558	513604	510470	499479	493125	507234	507252	507845	531115	505154	26909	9278	8855	12859	11255	13755	11095	12202	8540	9290	12403.8
1956	498720	486375	515619	512318	501320	494955	509130	509068	509774	533083	507036	27016	9310	8879	12904	11299	13818	11137	12237	8567	9315	12448.2
1957	500597	488206	517550	514254	503178	496756	511014	510955	511641	535054	508920	27113	9337	8926	12951	11334	13866	11164	12262	8587	9353	12489.3
1958	502405	490044	519463	516273	505064	498580	512876	512871	513619	536997	510819	27212	9369	8952	12995	11377	13899	11210	12306	8618	9377	12531.5
1959	504403	491886	521400	518177	506952	500416	514738	514796	515589	539128	512748	27317	9400	8981	13041	11419	13959	11253	12347	8651	9412	12578
1960	506216	493742	523413	520147	508871	502321	516656	516736	517482	541134	514672	27412	9431	9002	13084	11457	14006	11288	12393	8680	9445	12619.8
1961	508038	495592	525385	522062	510759	504155	518623	518651	519398	543154	516582	27500	9466	9028	13144	11489	14063	11318	12428	8712	9477	12662.5
1962	509900	497434	527339	524068	512633	506022	520616	520565	521324	545115	518502	27606	9499	9063	13179	11537	14117	11367	12470	8735	9513	12708.6
1963	511791	499236	529372	526030	514575	507898	522541	522544	523271	547061	520432	27719	9531	9094	13214	11577	14163	11396	12509	8762	9545	12751
1964	513783	501074	531292	527959	516492	509842	524465	524460	525168	549132	522367	27848	9558	9122	13252	11611	14210	11430	12538	8800	9566	12793.5
1965	515713	502922	533264	529943	518456	511682	526499	526440	527122	551185	524323	27944	9586	9169	13305	11649	14251	11462	12570	8820	9593	12834.9
1966	517610	504736	535226	531916	520355	513649	528452	528369	529046	553123	526248	28056	9625	9186	13340	11682	14289	11516	12599	8846	9630	12876.9
1967	519507	506627	537322	533976	522235	515498	530444	530388	530947	555198	528214	28151	9652	9216	13379	11729	14332	11549	12637	8871	9660	12917.6
1968	521527	508487	539353	535935	524087	517495	532500	532361	532936	557256	530194	28252	9676	9247	13422	11775	14385	11588	12672	8909	9693	12961.9
1969	523432	510391	541397	537963	526032	519527	534474	534322	534965	559260	532176	28346	9698	9274	13476	11816	14425	11620	12708	8937	9729	13002.9
1970	525312	512305	543423	539991	528016	521515	536455	536326	537041	561314	534170	28458	9731	9301	13524	11852	14471	11662	12769	8969	9768	13050.5
1971	527235	514193	545431	541974	530022	523544	538489	538393	539174	563416	536187	28554	9760	9325	13577	11900	14510	11691	12821	8996	9800	13093.4
1972	529087	516097	547475	544002	532003	525532	540511	540381	541231	565466	538178	28655	9789	9352	13617	11948	14570	11720	12865	9029	9827	13137.2
1973	531109	517862	549498	545985	534016	527503	542522	542435	543301	567585	540182	28778	9839	9382	13671	11989	14629	11758	12902	9063	9847	13185.8
1974	533077	519811	551571	548036	535895	529449	544549	544476	545351	569772	542199	28873	9867	9406	13722	12026	14682	11802	12939	9083	9878	13227.8
1975	535084	521752	553574	550091	537987	531416	546627	546496	547410	571987	544242	28986	9910	9428	13772	12077	14745	11834	12988	9110	9907	13275.7
1976	537159	523753	555642	552127	539966	533410	548699	548528	549496	574081	546286	29094	9945	9455	13829	12109	14804	11871	13029	9152	9941	13322.9
1977	539164	525710	557788	554227	542000	535397	550698	550568	551550	576278	548338	29209	9972	9474	13873	12158	14846	11905	13068	9185	9976	13366.6
1978	541205	527594	559835	556280	543967	537348	552729	552642	553603	578463	550367	29323	9988	9501	13922	12191	14882	11941	13110	9210	10009	13407.7
1979	543213	529583	561922	558334	545989	539414	554777	554746	555532	580594	552410	29429	10017	9531	13957	12244	14920	11986	13147	9243	10048	13452.2
1980	545172	531563	564030	560502	548046	541454	556847	556749	557662	582793	554482	29536	10054	9568	13994	12279	14972	12033	13193	9279	10093	13500.1
1981	547195	533581	566216	562601	550089	543540	558902	558842	559699	584978	556564	29640	10086	9602	14044	12321	15013	12069	13233	9293	10128	13542.9
1982	549329	535573	568320	564723	552192	545636	560974	560995	561755	587058	558656	29745	10107	9634	14122	12343	15059	12098	13269	9323	10165	13586.5
1983	551299	537555	570454	566774	554203	547669	563076	563043	563864	589227	560716	29853	10151	9672	14162	12376	15104	12120	13310	9357	10205	13631
1984	553281	539496	572521	568908	556212	549641	565185	565088	565898	591449	562768	29966	10184	9702	14216	12420	15157	12153	13349	9381	10242	13677
1985	555324	541596	574684	570963	558331	551758	567269	567249	567970	593604	564875	30070	10216	9737	14273	12464	15204	12207	13388	9413	10280	13725.2
1986	557391	543604	576715	573154	560445	553823	569310	569386	570071	595796	566970	30176	10257	9774	14317	12508	15256	12253	13448	9453	10303	13774.5
1987	559459	545590	578983	575259	562489	555812	571347	571450	572250	598016	569066	30293	10300	9802	14360	12565	15310	12289	13485	9477	10338	13821.9
1988	561493	547632	581158	577442	564714	557852	573452	573539	574378	600242	571190	30392	10327	9831	14409	12602	15353	12330	13524	9513	10375	13865.6
1989	563546	549801	583341	579627	566861	559860	575630	575705	576481	602511	573336	30505	10371	9860	14442	12651	15390	12378	13564	9537	10416	13911.4
1990	565592	551881	585497	581762	568935	561892	577763	577981	578673	604737	575471	30626	10398	9891	14471	12686	15445	12408	13613	9560	10446	13954.4
1991	567657	553963	587716	584035	571116	563922	579869	580122	580893	606982	577628	30741	10432	9929	14522	12728	15505	12443	13657	9595	10477	14002.9
1992	569774	556076	589886	586260	573267	566001	581988	582281	583057	609201	579779	30842	10467	9961	14586	12777	15556	12464	13700	9637	10507	14049.7
1993	571850	558179	592105	588472	575370	568127	584263	584439	585288	611480	581957	30957	10494	9996	14635	12824	15609	12508	13759	9671	10539	14099.2
1994	573910	560258	594366	590678	577536	570244	586414	586653	587437	613749	584124	31078	10530	10032	14687	12869	15667	12536	13806	9704	10576	14148.5
1995	576045	562475	596657	592826	579754	572358	588505	588921	589610	616030	586318	31210	10566	10055	14739	12911	15723	12586	13843	9731	10627	14199.1
1996	578215	564546	598813	595096	582033	574517	590775	591092	591714	618318	588512	31341	10598	10084	14790	12958	15778	12631	13882	9766	10659	14248.7
[truncated: 3 more rows]

## Sheet: Control+p53-Sil(-)CD-sim (b)
Control-sim (480 cells)+p53 RNAi-Silico(-)cell death-sim (20 cells)
	No of cells											No of cells
Time min x10	Control-sim	Control-sim	Control-sim	Control-sim	Control-sim	Control-sim	Control-sim	Control-sim	Control-sim	Control-sim	Average	p53 RNAi-Silico(-)cell death-Sim	p53 RNAi-Silico(-)cell death-Sim	p53 RNAi-Silico(-)cell death-Sim	p53 RNAi-Silico(-)cell death-Sim	p53 RNAi-Silico(-)cell death-Sim	p53 RNAi-Silico(-)cell death-Sim	p53 RNAi-Silico(-)cell death-Sim	p53 RNAi-Silico(-)cell death-Sim	p53 RNAi-Silico(-)cell death-Sim	p53 RNAi-Silico(-)cell death-Sim	Average
0	480	480	480	480	480	480	480	480	480	480	480	20	20	20	20	20	20	20	20	20	20	20
1	480	480	480	480	480	480	480	480	480	480	480	20	20	20	20	20	20	20	20	20	20	20
2	480	480	480	480	480	480	480	480	480	480	480	20	20	20	20	20	20	20	20	20	20	20
3	480	480	480	480	480	480	480	480	480	480	480	20	20	20	20	20	20	20	20	20	20	20
4	480	480	479	480	480	480	480	480	480	480	479.9	20	20	20	20	20	20	20	20	20	20	20
5	483	485	487	481	485	481	487	482	484	488	484.3	20	20	20	20	20	20	20	20	20	20	20
6	484	485	488	481	485	483	490	483	486	489	485.4	20	20	20	20	20	20	20	20	20	20	20
7	484	485	488	481	485	483	490	483	486	488	485.3	20	20	20	20	20	20	20	20	20	20	20
8	485	485	491	481	487	484	492	485	486	489	486.5	20	20	20	20	20	20	20	20	20	20	20
9	488	493	494	485	494	490	497	486	490	498	491.5	20	20	20	20	20	20	20	20	20	20	20
10	488	495	495	486	494	493	498	487	490	500	492.6	20	20	20	20	20	20	20	20	20	20	20
11	491	496	497	486	495	498	499	491	492	500	494.5	20	20	20	20	20	20	20	20	20	20	20
12	492	497	499	487	496	499	499	493	495	501	495.8	21	20	20	20	20	20	20	21	20	20	20.2
13	492	497	499	487	496	499	499	493	495	501	495.8	22	20	21	20	21	20	20	21	20	20	20.5
14	496	499	500	488	496	500	499	494	496	502	497	22	21	21	20	21	20	20	21	20	20	20.6
15	496	499	500	488	496	500	499	494	496	502	497	22	21	21	20	21	20	20	21	20	20	20.6
16	496	499	500	488	496	500	499	494	496	502	497	22	21	21	20	21	20	20	21	20	20	20.6
17	496	499	500	488	496	500	499	494	496	502	497	22	21	21	20	21	20	20	21	20	20	20.6
18	496	499	500	488	496	500	499	494	496	502	497	23	21	21	20	22	20	20	21	20	20	20.8
19	498	501	502	492	497	501	501	495	498	504	498.9	23	21	21	20	22	20	20	21	20	20	20.8
20	502	503	504	492	497	503	505	497	500	505	500.8	23	21	21	20	22	20	20	21	20	20	20.8
21	510	503	510	494	498	505	507	499	503	507	503.6	23	21	21	20	22	20	20	21	20	20	20.8
22	510	507	513	496	501	509	509	501	505	508	505.9	23	21	21	20	23	20	20	21	21	21	21.1
23	514	510	519	500	504	513	512	504	508	515	509.9	23	21	21	20	24	20	20	21	21	21	21.2
24	514	510	519	500	504	513	512	504	508	515	509.9	23	22	21	20	24	20	20	21	21	21	21.3
25	514	510	519	500	504	513	512	504	508	515	509.9	23	22	21	20	24	20	20	21	21	21	21.3
26	519	514	522	503	508	517	513	509	512	516	513.3	23	22	21	20	24	20	20	21	21	21	21.3
27	519	514	522	503	508	517	513	509	512	516	513.3	23	22	21	20	24	20	20	21	21	21	21.3
28	525	518	524	503	509	518	518	514	513	518	516	23	22	21	20	24	20	20	21	21	21	21.3
29	525	518	524	503	509	518	518	514	513	518	516	23	22	21	20	24	20	20	21	21	21	21.3
30	525	518	524	503	509	518	518	514	513	518	516	23	22	21	20	24	20	20	21	21	21	21.3
31	525	518	524	503	509	518	518	514	513	518	516	23	22	21	20	24	20	20	21	21	21	21.3
32	525	518	524	503	509	518	518	514	513	518	516	23	22	21	20	24	20	20	21	21	21	21.3
33	525	519	527	505	510	519	519	515	515	521	517.5	23	22	21	20	24	20	20	21	21	21	21.3
34	525	519	527	505	510	519	519	515	515	521	517.5	24	22	21	20	24	20	20	21	22	21	21.5
35	525	519	527	505	510	519	519	515	515	521	517.5	24	22	21	20	24	20	20	21	22	21	21.5
36	525	518	527	505	510	519	519	515	515	521	517.4	24	22	21	20	24	20	20	21	22	21	21.5
37	525	523	531	506	512	519	526	517	516	525	520	24	22	21	20	24	20	20	21	22	21	21.5
38	527	527	536	517	515	525	529	522	520	530	524.8	24	22	21	20	24	20	20	21	22	21	21.5
39	529	528	536	518	516	525	530	523	523	532	526	24	22	21	20	24	20	20	21	22	21	21.5
40	531	531	536	521	517	526	531	524	523	532	527.2	24	22	21	20	24	20	20	21	23	21	21.6
41	533	533	537	521	519	528	531	526	524	533	528.5	24	22	21	20	24	20	20	21	24	21	21.7
42	534	533	537	522	519	528	532	527	525	534	529.1	24	22	21	20	24	20	20	21	24	21	21.7
43	534	533	537	522	519	528	532	527	525	534	529.1	24	22	21	20	24	20	20	21	24	21	21.7
44	535	535	537	524	519	532	534	527	526	534	530.3	24	22	21	20	24	20	20	21	24	21	21.7
45	539	536	540	525	520	533	536	528	526	538	532.1	24	22	21	20	24	20	20	21	24	21	21.7
46	542	540	541	527	522	536	538	529	527	539	534.1	24	22	21	20	24	20	20	21	24	21	21.7
47	544	542	543	533	528	538	541	530	527	538	536.4	24	22	21	20	24	20	20	21	24	21	21.7
48	547	547	545	537	531	541	542	532	530	544	539.6	24	22	22	20	24	20	20	21	24	21	21.8
49	549	549	548	538	535	543	544	532	532	547	541.7	24	22	22	20	24	20	20	21	24	21	21.8
50	551	549	550	540	536	545	546	534	535	549	543.5	24	22	22	20	24	20	20	21	24	21	21.8
51	555	555	552	541	540	551	547	537	537	549	546.4	24	22	22	21	24	20	20	21	24	21	21.9
52	555	554	552	541	540	550	547	537	537	549	546.2	24	22	22	21	24	20	20	21	24	21	21.9
53	556	555	554	542	542	553	547	540	537	552	547.8	24	22	22	21	24	20	20	21	24	22	22
54	558	557	555	543	545	555	549	541	538	553	549.4	24	22	22	21	24	21	20	21	24	22	22.1
55	558	557	556	544	545	557	550	542	540	554	550.3	24	22	22	21	24	21	20	21	24	22	22.1
56	561	557	557	547	545	559	553	544	542	554	551.9	24	22	22	21	25	21	20	21	24	22	22.2
57	561	557	557	547	545	559	553	544	542	553	551.8	24	22	22	21	25	21	20	21	24	22	22.2
58	564	563	560	549	547	561	557	548	544	555	554.8	24	22	22	21	25	22	20	22	24	22	22.4
59	564	563	560	549	547	561	557	548	544	555	554.8	24	22	22	21	25	22	20	22	24	22	22.4
60	567	564	561	549	549	563	562	552	545	559	557.1	24	22	22	21	25	22	20	22	24	22	22.4
61	567	567	563	552	549	564	565	554	546	559	558.6	24	23	22	21	25	22	20	22	24	23	22.6
62	567	567	563	552	549	564	565	553	546	559	558.5	24	23	22	21	25	22	20	22	24	23	22.6
63	568	567	566	553	551	566	567	554	546	563	560.1	24	23	22	21	25	22	20	22	24	23	22.6
64	570	570	566	553	552	568	569	557	550	565	562	24	24	22	21	26	22	20	22	24	23	22.8
65	572	571	566	554	553	571	569	559	550	565	563	24	24	22	21	26	22	20	22	24	23	22.8
66	575	573	570	558	557	571	570	561	552	568	565.5	24	24	22	21	26	22	20	22	24	24	22.9
67	575	573	571	560	558	573	572	563	553	568	566.6	24	24	22	21	26	22	21	22	24	24	23
68	576	575	571	562	559	574	574	565	557	570	568.3	24	24	22	21	26	22	21	22	25	24	23.1
69	579	580	575	565	565	578	578	569	562	573	572.4	24	24	22	21	26	22	21	22	25	24	23.1
70	585	585	581	568	571	587	584	574	568	579	578.2	25	24	22	21	26	22	21	22	25	24	23.2
71	585	585	581	568	571	587	584	574	568	579	578.2	25	24	22	21	26	22	21	22	25	24	23.2
72	585	585	581	568	571	587	584	574	568	579	578.2	25	24	22	21	26	22	21	22	25	24	23.2
73	585	585	581	568	571	587	584	574	568	579	578.2	25	24	22	21	26	22	21	22	25	24	23.2
74	591	587	584	571	571	590	584	576	574	581	580.9	25	24	23	21	26	22	21	22	25	24	23.3
75	595	590	585	574	572	593	586	580	577	583	583.5	25	24	23	21	26	22	22	22	25	25	23.5
76	595	590	586	576	573	594	588	581	578	585	584.6	25	24	24	21	26	22	22	22	25	25	23.6
77	595	590	586	576	573	594	588	581	578	585	584.6	25	24	24	21	26	22	22	22	25	25	23.6
78	597	593	589	576	576	594	590	583	580	587	586.5	25	24	24	21	26	22	22	22	25	25	23.6
79	597	593	589	576	576	594	590	583	580	587	586.5	25	24	24	21	26	22	22	22	25	25	23.6
80	598	594	589	578	577	594	591	585	581	588	587.5	25	25	24	21	26	22	22	22	25	25	23.7
81	598	594	589	578	577	594	591	585	581	588	587.5	25	25	24	21	26	22	22	22	25	25	23.7
82	602	595	593	580	578	596	593	586	582	589	589.4	25	25	24	21	26	22	22	22	25	25	23.7
83	603	596	593	580	579	597	595	586	583	591	590.3	25	25	24	21	26	22	22	22	25	25	23.7
84	603	596	592	580	579	597	595	586	583	591	590.2	25	25	24	21	26	22	22	22	25	25	23.7
85	604	597	594	581	579	598	596	587	584	591	591.1	25	25	24	21	26	22	22	22	25	25	23.7
86	605	598	596	583	581	599	598	589	585	592	592.6	25	25	24	21	26	22	23	22	25	25	23.8
87	606	598	598	586	582	600	602	590	586	595	594.3	25	25	24	21	26	22	23	22	25	25	23.8
88	606	598	598	585	582	600	602	590	586	595	594.2	25	25	24	21	26	22	23	22	25	25	23.8
89	610	599	606	588	582	604	604	591	587	599	597	25	25	24	21	26	22	23	22	25	25	23.8
90	611	600	610	593	583	607	604	595	589	605	599.7	25	25	24	21	26	22	23	22	25	25	23.8
91	611	600	610	593	583	607	604	595	589	605	599.7	25	25	24	21	26	22	23	22	25	25	23.8
92	611	600	610	593	583	607	604	595	589	605	599.7	25	25	24	21	26	22	23	22	25	25	23.8
93	612	600	613	596	585	614	604	596	590	608	601.8	25	25	24	21	26	22	23	22	25	25	23.8
94	612	600	613	596	585	614	604	596	590	608	601.8	25	25	25	21	26	22	23	22	25	25	23.9
95	615	602	619	599	592	614	607	602	595	610	605.5	25	25	25	21	26	22	23	22	25	25	23.9
96	616	602	619	600	592	617	608	604	597	611	606.6	25	25	25	21	26	22	23	22	25	25	23.9
97	616	602	619	600	594	618	610	610	600	613	608.2	25	25	25	21	26	22	23	22	25	25	23.9
98	618	603	620	600	594	620	614	611	604	615	609.9	25	25	25	22	26	22	23	22	25	25	24
99	621	603	621	600	594	622	614	611	605	616	610.7	26	25	25	22	26	22	23	22	25	25	24.1
100	624	605	626	601	596	623	616	613	608	618	613	26	25	25	22	26	22	23	22	25	25	24.1
101	624	608	626	602	596	623	616	613	608	618	613.4	26	25	25	22	26	22	23	22	25	25	24.1
102	624	608	626	602	596	623	616	613	608	618	613.4	26	25	25	22	26	22	23	22	25	25	24.1
103	630	612	632	604	602	625	621	617	610	623	617.6	26	25	25	22	26	22	24	23	25	25	24.3
104	630	612	631	604	602	625	621	617	610	623	617.5	26	26	25	22	26	22	24	23	25	25	24.4
105	633	613	632	607	604	626	627	622	614	625	620.3	26	26	25	22	26	22	24	23	25	25	24.4
106	637	616	633	611	610	627	627	624	620	633	623.8	26	26	25	22	26	22	24	23	25	25	24.4
107	637	616	633	609	610	627	627	624	620	632	623.5	26	26	25	22	26	23	24	23	25	25	24.5
108	637	620	636	612	612	629	628	626	624	634	625.8	26	26	25	22	26	23	24	23	25	25	24.5
109	637	620	638	616	613	631	633	626	629	636	627.9	26	26	25	22	26	23	24	23	25	25	24.5
110	638	621	637	617	613	632	633	625	630	637	628.3	26	26	26	22	26	23	24	23	26	25	24.7
111	638	621	637	617	613	630	633	625	630	637	628.1	26	26	26	22	26	23	24	23	26	25	24.7
112	638	621	637	617	613	630	633	625	630	637	628.1	26	27	26	22	26	23	24	24	26	25	24.9
113	638	621	637	617	613	630	633	625	630	637	628.1	26	27	26	22	26	23	24	24	26	25	24.9
114	638	621	637	617	612	630	633	625	630	637	628	26	27	26	23	26	23	24	24	26	25	25
115	644	622	636	617	614	634	637	628	634	639	630.5	26	27	26	23	26	24	24	24	26	25	25.1
116	644	622	636	617	614	634	637	628	634	639	630.5	26	27	26	23	27	24	24	24	26	25	25.2
117	644	624	636	623	619	635	638	634	635	641	632.9	26	27	27	24	27	24	24	24	26	25	25.4
118	644	624	636	623	619	635	638	634	635	640	632.8	27	27	27	24	27	24	24	24	26	25	25.5
119	648	628	644	626	622	643	644	643	643	642	638.3	27	27	27	24	27	24	24	24	26	25	25.5
120	651	631	644	630	624	648	645	644	644	645	640.6	27	27	27	24	27	24	24	24	26	25	25.5
121	656	636	651	634	631	654	653	653	651	653	647.2	27	28	27	24	27	25	24	24	26	25	25.7
122	657	638	652	634	634	654	655	653	653	653	648.3	27	28	27	24	27	25	24	24	26	25	25.7
123	658	640	652	636	635	654	656	654	653	653	649.1	27	28	27	24	27	25	24	25	26	25	25.8
124	659	641	652	638	635	658	657	654	655	654	650.3	27	28	27	24	27	25	24	25	26	25	25.8
125	663	644	654	638	637	661	661	655	656	655	652.4	27	28	28	24	27	25	24	25	26	25	25.9
126	664	646	656	641	640	662	665	658	658	655	654.5	27	28	28	24	27	25	24	25	26	25	25.9
127	666	648	656	644	641	663	666	658	659	658	655.9	27	28	28	24	27	25	24	25	26	25	25.9
128	668	652	662	648	649	665	671	659	661	659	659.4	27	28	28	25	27	25	24	25	27	25	26.1
129	672	653	664	650	652	666	675	660	661	660	661.3	27	28	28	25	27	25	24	25	27	25	26.1
130	673	655	665	653	655	668	676	663	665	665	663.8	27	28	28	25	27	26	24	25	27	25	26.2
131	679	659	670	656	657	668	679	668	668	668	667.2	27	28	28	25	27	26	24	25	27	25	26.2
132	684	663	674	659	661	673	682	677	673	672	671.8	27	28	28	25	27	26	24	25	27	25	26.2
133	689	666	678	663	664	680	686	677	675	681	675.9	27	28	28	26	27	26	24	25	27	26	26.4
134	692	669	678	666	668	685	687	681	677	688	679.1	27	28	28	27	28	26	25	25	27	26	26.7
135	697	679	681	670	672	688	691	684	681	691	683.4	27	28	28	27	29	26	26	25	27	26	26.9
136	698	682	684	671	674	691	695	686	682	694	685.7	27	28	28	27	29	26	26	25	27	26	26.9
137	707	684	686	674	675	693	697	691	686	697	689	27	28	28	27	29	26	26	25	27	26	26.9
138	707	684	686	673	675	693	697	691	686	697	688.9	27	28	29	27	29	26	26	25	27	26	27
139	709	685	688	674	676	694	700	691	687	698	690.2	27	28	29	27	29	27	26	25	27	26	27.1
140	711	686	688	677	679	695	702	695	689	701	692.3	27	28	29	27	29	27	26	25	27	26	27.1
141	711	686	692	679	681	696	705	698	691	701	694	27	28	29	27	29	27	26	25	27	26	27.1
142	713	687	696	679	684	699	708	704	694	704	696.8	27	28	29	27	29	27	26	25	27	26	27.1
143	715	689	700	681	685	702	712	704	696	706	699	27	28	29	27	29	27	26	25	27	26	27.1
144	716	691	703	686	686	704	716	704	697	706	700.9	27	28	29	27	29	27	26	25	27	26	27.1
145	716	691	703	686	686	704	716	704	697	706	700.9	27	28	29	27	29	27	26	25	27	26	27.1
146	718	693	709	687	688	706	716	704	697	709	702.7	27	28	29	27	29	27	26	25	27	26	27.1
147	718	693	710	687	689	706	718	704	697	709	703.1	27	28	29	27	29	27	26	25	27	26	27.1
148	718	693	711	689	689	706	720	706	697	709	703.8	27	28	29	27	29	27	27	25	27	26	27.2
149	721	696	716	689	689	708	721	709	698	711	705.8	27	28	30	27	29	27	27	25	27	26	27.3
150	721	696	717	689	689	709	721	709	699	711	706.1	27	28	30	27	29	27	27	25	27	26	27.3
151	723	698	718	691	691	710	723	709	701	713	707.7	27	28	30	27	29	27	28	25	27	26	27.4
152	726	700	722	695	694	712	724	710	703	717	710.3	27	28	30	27	29	27	28	25	28	26	27.5
153	729	702	722	698	695	713	725	712	705	717	711.8	27	28	30	27	29	27	28	28	28	26	27.8
154	738	705	728	704	700	717	730	720	713	723	717.8	27	28	30	27	30	27	28	28	28	26	27.9
155	736	704	730	705	700	718	732	720	714	723	718.2	27	28	30	27	30	27	28	28	28	27	28
156	740	709	732	711	708	724	733	725	719	728	722.9	27	28	30	27	30	27	28	28	28	27	28
157	743	715	735	714	711	728	740	728	724	734	727.2	27	28	30	27	30	27	28	28	28	27	28
158	743	715	735	714	710	729	740	729	724	734	727.3	27	29	30	27	30	27	28	28	28	27	28.1
159	743	716	736	718	712	731	742	732	726	738	729.4	28	29	30	27	30	27	28	28	28	28	28.3
160	744	719	739	723	712	733	745	733	727	739	731.4	28	29	30	27	30	27	28	28	28	28	28.3
161	746	722	741	725	714	735	749	736	727	741	733.6	28	29	30	27	30	27	28	28	28	28	28.3
162	755	729	751	735	721	742	757	746	734	746	741.6	28	29	30	27	30	27	28	28	28	28	28.3
163	757	732	751	735	723	743	758	747	735	747	742.8	28	29	30	27	30	27	28	28	28	28	28.3
164	757	734	753	736	724	743	758	747	735	748	743.5	28	29	30	27	30	27	28	28	28	28	28.3
165	762	737	755	739	724	747	764	750	738	752	746.8	30	29	30	27	30	27	28	28	28	28	28.5
166	762	737	755	740	724	748	764	750	739	753	747.2	30	29	30	27	31	27	28	29	28	29	28.8
167	764	737	759	741	726	750	765	752	740	754	748.8	30	29	30	27	31	27	28	29	28	29	28.8
168	768	745	760	746	731	755	770	755	744	758	753.2	30	29	30	27	31	27	28	29	28	30	28.9
169	769	747	761	751	732	755	771	757	749	759	755.1	30	29	30	27	32	27	28	29	28	31	29.1
170	770	749	763	752	733	756	771	757	750	760	756.1	30	29	30	27	32	27	28	29	28	31	29.1
171	770	749	763	752	733	757	772	759	751	760	756.6	30	29	30	27	32	27	28	29	28	31	29.1
172	781	751	767	756	738	762	775	762	757	766	761.5	31	29	30	27	32	27	28	29	28	31	29.2
173	781	752	767	757	739	762	775	763	757	766	761.9	31	29	30	28	32	27	28	29	28	31	29.3
174	783	752	767	758	740	762	778	762	757	767	762.6	31	29	30	28	34	27	29	29	28	31	29.6
175	783	752	767	759	744	762	779	762	759	767	763.4	31	29	30	28	34	27	29	29	28	31	29.6
176	783	755	767	759	744	763	780	763	759	768	764.1	31	29	30	28	36	28	29	29	28	31	29.9
177	783	758	770	759	749	765	780	763	761	771	765.9	31	29	30	28	36	28	29	29	29	31	30
178	787	761	774	761	755	768	783	764	761	778	769.2	32	29	30	28	36	28	30	29	29	31	30.2
179	790	764	775	763	757	771	786	768	766	783	772.3	32	31	30	28	36	28	30	29	29	31	30.4
180	793	766	775	765	757	774	787	768	767	788	774	32	31	30	28	36	28	30	29	29	31	30.4
181	796	768	779	767	758	780	789	771	771	790	776.9	32	31	30	28	36	29	30	29	29	31	30.5
182	798	771	781	769	762	781	791	773	771	793	779	32	31	31	29	36	29	30	29	29	32	30.8
183	809	780	787	777	772	789	800	775	775	800	786.4	32	31	31	29	36	29	30	29	29	33	30.9
184	809	782	789	779	775	790	802	777	777	801	788.1	32	31	31	29	37	29	30	29	29	34	31.1
185	813	784	791	780	780	790	809	778	779	805	790.9	32	32	31	29	37	29	30	29	29	34	31.2
186	813	788	793	781	783	792	810	783	780	805	792.8	32	32	31	29	37	29	30	29	29	34	31.2
187	814	794	796	786	784	798	812	789	781	813	796.7	32	32	31	29	37	30	30	29	29	34	31.3
188	817	795	797	787	785	800	815	789	782	817	798.4	32	32	31	29	38	30	30	29	29	34	31.4
189	818	799	802	789	789	802	820	791	784	820	801.4	32	32	31	29	39	30	30	30	29	34	31.6
190	821	804	804	792	795	805	823	795	791	823	805.3	32	32	31	29	39	30	30	30	30	34	31.7
191	823	806	805	797	798	808	824	797	796	824	807.8	32	32	31	29	39	30	30	30	30	34	31.7
192	823	807	806	800	799	809	827	797	796	825	808.9	32	32	31	29	39	30	30	30	30	34	31.7
193	824	809	807	800	800	809	827	798	797	826	809.7	32	32	31	29	39	30	30	30	30	35	31.8
194	825	809	808	802	801	810	829	800	798	826	810.8	32	32	31	29	40	30	30	30	30	35	31.9
195	829	814	808	805	803	814	833	802	799	829	813.6	32	32	31	29	40	30	30	30	30	35	31.9
196	834	814	811	806	806	820	837	804	803	834	816.9	32	32	31	29	41	30	30	30	30	35	32
197	842	818	813	807	808	823	839	808	804	835	819.7	32	32	31	29	41	30	30	30	30	35	32
198	846	821	814	811	810	825	839	812	805	837	822	32	32	31	29	41	30	30	30	30	35	32
199	853	824	818	821	812	834	843	812	808	841	826.6	32	32	31	29	41	30	30	30	30	36	32.1
200	854	827	820	824	814	835	845	813	809	842	828.3	32	32	31	29	41	30	30	30	30	36	32.1
201	855	828	821	826	814	835	845	814	813	844	829.5	32	32	31	29	41	30	30	30	30	36	32.1
202	864	835	824	828	817	839	851	817	817	844	833.6	32	32	31	29	41	30	30	30	30	36	32.1
203	865	838	826	828	817	840	852	817	819	844	834.6	32	32	31	29	41	30	30	30	30	36	32.1
204	870	844	831	832	822	842	854	820	822	845	838.2	32	32	31	29	41	30	30	30	32	36	32.3
205	875	845	832	836	823	841	854	821	822	850	839.9	32	32	31	29	41	30	31	30	32	36	32.4
206	876	847	836	841	826	844	858	825	822	853	842.8	32	32	31	29	41	30	31	30	32	36	32.4
207	879	848	839	845	830	846	863	830	825	852	845.7	32	32	31	29	41	30	31	30	32	36	32.4
208	881	852	840	845	832	846	866	833	826	853	847.4	32	32	32	29	41	30	31	30	33	36	32.6
209	881	854	841	847	832	846	867	836	828	855	848.7	32	32	32	29	41	30	31	30	33	36	32.6
210	886	856	844	851	834	853	870	837	830	855	851.6	32	32	32	29	41	30	31	30	34	36	32.7
211	886	858	846	854	835	857	871	839	832	857	853.5	32	32	32	29	42	30	31	30	34	36	32.8
212	889	859	848	855	838	858	873	842	832	859	855.3	32	32	32	29	42	31	32	30	34	36	33
213	890	859	852	857	840	858	874	843	832	861	856.6	33	33	32	29	42	31	32	31	34	36	33.3
214	891	860	857	858	846	862	877	844	833	866	859.4	33	33	32	29	42	31	32	31	34	36	33.3
215	894	860	861	861	846	863	879	845	835	868	861.2	33	33	32	29	42	31	33	31	34	36	33.4
216	897	863	861	864	848	865	878	848	842	871	863.7	33	33	32	29	42	31	33	31	34	36	33.4
217	900	869	867	867	851	871	883	852	843	871	867.4	33	33	32	29	42	31	33	31	34	36	33.4
218	904	871	870	871	854	873	886	856	843	875	870.3	33	33	32	29	42	31	33	31	34	36	33.4
219	909	878	878	873	857	875	889	857	846	880	874.2	33	33	32	29	42	31	33	31	34	36	33.4
220	911	883	881	877	861	877	888	863	849	885	877.5	33	33	32	29	42	31	33	31	34	36	33.4
221	914	886	885	879	861	878	894	867	852	886	880.2	33	33	32	29	42	31	33	31	34	36	33.4
222	918	889	886	883	862	880	895	869	854	887	882.3	33	33	33	29	42	31	33	31	34	36	33.5
223	920	891	889	889	864	886	897	872	858	889	885.5	33	33	33	29	42	31	33	31	34	36	33.5
224	922	893	893	896	866	891	905	877	864	896	890.3	33	34	33	30	42	31	33	31	34	37	33.8
225	926	897	897	900	867	892	910	880	866	900	893.5	34	34	33	30	42	31	33	31	34	37	33.9
226	928	901	903	902	870	893	913	884	869	904	896.7	34	34	33	30	42	32	33	31	34	37	34
227	933	906	907	902	874	896	915	890	874	906	900.3	34	34	33	30	42	32	33	31	34	37	34
228	937	913	912	903	880	902	916	894	878	907	904.2	34	35	33	30	42	32	33	31	35	38	34.3
229	941	919	912	907	882	906	921	895	881	913	907.7	34	35	33	30	42	32	33	31	35	38	34.3
230	943	923	913	909	884	911	924	897	881	917	910.2	35	35	33	30	43	32	33	31	35	38	34.5
231	944	925	916	910	887	911	928	898	883	919	912.1	36	35	33	30	43	32	33	31	35	39	34.7
232	947	927	918	911	889	912	930	901	884	922	914.1	36	35	33	30	44	32	33	31	35	40	34.9
233	949	930	921	911	890	921	932	902	887	926	916.9	36	35	33	30	44	32	33	31	35	40	34.9
234	950	937	924	916	893	925	936	909	890	930	921	36	35	33	30	45	32	33	31	35	40	35
235	955	944	928	917	895	927	937	911	890	933	923.7	37	36	33	30	45	32	33	32	35	40	35.3
236	961	949	935	918	899	931	945	917	898	939	929.2	37	36	33	30	45	32	34	32	35	40	35.4
237	967	950	936	921	900	936	949	924	901	942	932.6	37	36	33	30	45	32	34	32	35	40	35.4
238	973	954	939	926	902	936	953	926	904	946	935.9	37	36	33	30	45	32	34	32	35	40	35.4
239	973	955	941	930	905	944	955	934	906	948	939.1	37	37	33	30	45	32	34	32	35	40	35.5
240	976	957	944	935	908	949	956	936	908	952	942.1	37	37	33	30	45	32	34	32	35	40	35.5
241	977	958	946	937	911	950	957	937	909	957	943.9	37	37	33	31	45	32	35	32	35	40	35.7
242	977	960	952	939	913	951	962	942	911	961	946.8	37	37	33	31	45	32	35	32	36	40	35.8
243	978	963	954	942	915	954	965	944	913	964	949.2	38	37	33	31	45	32	35	32	36	40	35.9
244	987	968	958	951	920	957	966	946	922	964	953.9	38	37	33	31	45	32	36	32	36	40	36
245	987	971	962	952	924	961	967	948	927	968	956.7	38	37	33	32	45	32	36	32	36	40	36.1
246	990	975	964	956	924	965	968	948	932	972	959.4	38	37	33	33	45	32	36	32	36	40	36.2
247	991	978	967	958	929	970	970	949	937	974	962.3	38	37	33	33	45	32	36	32	36	41	36.3
248	994	980	969	960	931	971	972	951	942	977	964.7	38	37	33	33	45	32	36	32	36	41	36.3
249	997	981	972	961	935	972	975	953	943	979	966.8	38	37	33	33	45	32	36	32	36	41	36.3
250	1001	988	976	964	938	976	977	958	947	980	970.5	38	37	33	33	45	32	36	32	36	41	36.3
251	1005	991	981	968	940	979	982	961	950	985	974.2	38	37	33	33	45	33	36	32	37	43	36.7
252	1009	996	984	971	941	983	985	965	954	988	977.6	38	37	33	33	45	33	36	32	37	43	36.7
253	1013	999	987	975	946	990	990	970	958	993	982.1	38	37	34	33	45	33	36	32	37	43	36.8
254	1020	1006	991	977	947	995	992	973	960	999	986	38	38	34	33	45	33	36	32	37	43	36.9
255	1022	1010	992	980	952	1001	994	976	963	1001	989.1	38	38	35	33	45	33	36	32	37	43	37
256	1024	1011	993	983	953	1003	996	976	966	1003	990.8	38	38	35	34	45	33	36	32	37	43	37.1
257	1026	1014	999	984	960	1007	1001	979	970	1008	994.8	38	38	35	34	45	34	36	32	37	43	37.2
258	1030	1016	1004	987	960	1013	1003	982	979	1011	998.5	38	38	36	34	45	34	37	32	37	43	37.4
259	1033	1018	1011	991	963	1019	1007	984	982	1013	1002.1	38	38	36	34	45	34	37	32	37	43	37.4
260	1035	1027	1017	994	967	1028	1014	986	990	1016	1007.4	38	38	36	34	45	34	37	32	37	43	37.4
261	1036	1027	1018	994	968	1029	1020	989	992	1021	1009.4	38	39	36	34	46	34	37	32	38	43	37.7
262	1036	1028	1019	999	969	1031	1021	992	995	1023	1011.3	38	39	36	34	46	34	37	32	38	43	37.7
263	1039	1030	1026	1001	970	1035	1025	993	998	1026	1014.3	38	39	36	34	46	34	37	32	38	43	37.7
264	1039	1030	1027	1003	974	1039	1027	999	997	1027	1016.2	38	39	36	34	46	34	37	32	38	43	37.7
265	1042	1036	1030	1006	976	1041	1031	1003	999	1029	1019.3	38	39	36	34	46	34	37	33	38	43	37.8
266	1046	1036	1032	1011	979	1041	1034	1005	1001	1032	1021.7	39	40	36	34	46	34	38	33	39	43	38.2
267	1049	1037	1036	1019	980	1042	1035	1009	1003	1036	1024.6	39	40	36	34	46	34	38	33	39	43	38.2
268	1052	1036	1038	1023	983	1042	1038	1009	1002	1037	1026	39	40	36	35	46	34	38	33	39	43	38.3
269	1055	1040	1041	1024	988	1043	1043	1012	1008	1041	1029.5	39	41	36	35	46	34	38	33	39	43	38.4
270	1058	1043	1044	1026	990	1045	1044	1016	1009	1046	1032.1	39	41	36	35	46	34	38	33	39	43	38.4
271	1065	1044	1051	1029	992	1052	1050	1022	1014	1051	1037	39	41	36	35	47	34	38	33	39	43	38.5
272	1071	1047	1054	1030	994	1055	1052	1025	1017	1050	1039.5	39	42	36	36	47	34	38	33	39	43	38.7
273	1072	1053	1057	1033	996	1056	1056	1029	1021	1055	1042.8	39	42	36	36	47	34	38	33	39	43	38.7
274	1074	1053	1061	1034	998	1059	1060	1031	1023	1057	1045	39	42	36	36	47	34	39	33	39	43	38.8
275	1078	1056	1065	1038	1002	1062	1064	1033	1026	1058	1048.2	39	42	36	36	47	34	39	33	39	43	38.8
276	1080	1057	1070	1040	1004	1065	1066	1037	1027	1061	1050.7	39	43	36	36	47	35	39	33	39	43	39
277	1085	1060	1071	1041	1008	1070	1070	1041	1035	1065	1054.6	39	43	37	36	47	35	39	33	40	43	39.2
278	1089	1061	1072	1044	1010	1073	1071	1045	1038	1070	1057.3	39	43	37	36	47	35	39	33	41	44	39.4
279	1094	1063	1075	1047	1014	1078	1079	1053	1040	1072	1061.5	39	43	38	36	47	35	39	33	41	44	39.5
280	1097	1066	1079	1056	1019	1079	1081	1057	1043	1076	1065.3	39	43	38	36	47	35	39	33	41	44	39.5
281	1102	1072	1083	1056	1026	1085	1092	1059	1046	1081	1070.2	39	43	38	36	47	35	39	33	41	44	39.5
282	1108	1074	1085	1058	1030	1086	1096	1062	1051	1085	1073.5	40	43	38	36	47	35	39	33	41	44	39.6
283	1109	1079	1089	1066	1032	1087	1099	1066	1052	1087	1076.6	40	44	39	37	47	35	39	33	41	44	39.9
284	1111	1082	1093	1070	1036	1091	1100	1071	1057	1092	1080.3	40	44	39	37	47	35	40	34	42	44	40.2
285	1117	1086	1094	1074	1038	1094	1103	1074	1061	1093	1083.4	41	44	39	37	47	35	40	34	42	44	40.3
286	1122	1086	1094	1077	1042	1098	1113	1081	1063	1101	1087.7	42	44	39	37	47	36	40	34	42	44	40.5
287	1124	1088	1098	1079	1045	1104	1115	1085	1066	1102	1090.6	42	44	39	37	47	37	40	34	42	44	40.6
288	1127	1092	1100	1086	1049	1106	1120	1088	1069	1106	1094.3	42	44	39	37	47	37	40	34	43	44	40.7
289	1131	1096	1102	1090	1051	1114	1130	1089	1072	1113	1098.8	42	44	39	37	47	37	41	34	43	44	40.8
290	1138	1101	1109	1094	1053	1120	1133	1091	1078	1117	1103.4	42	44	40	38	47	37	41	34	43	44	41
291	1139	1102	1110	1097	1057	1125	1136	1097	1078	1119	1106	42	44	40	38	47	37	41	34	43	44	41
292	1143	1106	1112	1101	1060	1129	1136	1102	1082	1124	1109.5	42	44	40	38	47	37	41	34	43	44	41
293	1145	1111	1119	1103	1062	1133	1138	1106	1082	1129	1112.8	42	44	40	38	47	37	41	34	43	44	41
294	1149	1114	1122	1106	1066	1134	1141	1109	1084	1129	1115.4	42	45	40	38	47	37	41	34	43	44	41.1
295	1153	1121	1131	1111	1070	1145	1144	1116	1088	1133	1121.2	43	46	41	38	47	37	41	34	43	44	41.4
296	1159	1122	1134	1116	1074	1145	1147	1124	1092	1139	1125.2	43	47	42	38	47	37	41	35	43	45	41.8
297	1162	1123	1137	1118	1077	1146	1149	1132	1097	1140	1128.1	43	47	43	38	47	37	41	35	43	45	41.9
298	1166	1130	1142	1118	1083	1152	1152	1138	1099	1143	1132.3	43	47	43	39	47	37	41	35	43	45	42
299	1173	1133	1151	1123	1089	1156	1159	1139	1101	1146	1137	43	47	43	39	47	37	41	35	43	45	42
300	1178	1137	1154	1131	1092	1158	1163	1143	1103	1151	1141	43	47	43	39	47	37	41	35	43	45	42
301	1181	1140	1159	1136	1097	1162	1166	1148	1106	1159	1145.4	43	47	43	40	47	38	41	36	43	45	42.3
302	1181	1146	1162	1142	1107	1167	1167	1157	1110	1160	1149.9	43	48	44	40	47	38	41	36	43	45	42.5
303	1184	1154	1165	1147	1110	1169	1173	1158	1114	1163	1153.7	43	49	45	40	47	38	41	36	43	45	42.7
304	1186	1156	1167	1149	1112	1175	1179	1165	1123	1167	1157.9	43	49	45	40	47	38	41	36	43	45	42.7
305	1187	1159	1168	1155	1114	1181	1182	1171	1129	1169	1161.5	43	49	45	41	47	38	41	36	44	45	42.9
306	1190	1161	1171	1158	1118	1188	1190	1172	1132	1176	1165.6	43	49	45	41	47	38	41	37	44	45	43
307	1194	1168	1174	1164	1124	1191	1194	1178	1135	1177	1169.9	44	49	45	41	47	38	41	37	44	45	43.1
308	1198	1171	1181	1168	1130	1198	1198	1181	1145	1182	1175.2	44	50	45	41	47	39	41	38	44	46	43.5
309	1202	1174	1184	1170	1137	1205	1198	1184	1150	1186	1179	44	50	45	41	47	39	41	38	44	46	43.5
310	1207	1181	1187	1174	1142	1209	1200	1187	1152	1188	1182.7	44	50	46	41	47	40	41	38	44	46	43.7
311	1210	1181	1193	1176	1147	1214	1204	1189	1158	1192	1186.4	44	50	46	41	47	40	41	38	44	46	43.7
312	1219	1188	1197	1177	1151	1219	1210	1193	1164	1194	1191.2	45	50	46	41	47	40	41	38	44	46	43.8
313	1222	1193	1198	1178	1154	1223	1213	1196	1169	1198	1194.4	45	50	48	41	47	40	41	38	44	47	44.1
314	1232	1198	1207	1182	1157	1227	1225	1197	1174	1204	1200.3	45	50	48	41	47	40	41	38	44	47	44.1
315	1236	1201	1214	1187	1160	1231	1228	1199	1177	1208	1204.1	45	50	48	41	47	40	41	38	44	47	44.1
316	1246	1199	1216	1192	1164	1238	1233	1205	1183	1212	1208.8	45	50	48	41	47	40	41	38	44	47	44.1
317	1252	1200	1221	1198	1168	1243	1238	1208	1188	1215	1213.1	45	50	48	41	48	40	41	39	45	47	44.4
318	1259	1201	1225	1200	1167	1247	1243	1210	1192	1217	1216.1	45	50	48	41	48	40	41	39	45	47	44.4
319	1265	1204	1228	1207	1169	1250	1251	1212	1193	1219	1219.8	47	50	48	41	48	40	41	40	45	47	44.7
320	1270	1207	1237	1214	1173	1255	1253	1214	1198	1223	1224.4	47	50	48	41	48	40	41	40	45	47	44.7
321	1273	1211	1244	1222	1178	1258	1254	1219	1206	1229	1229.4	47	50	48	42	48	40	41	41	45	47	44.9
322	1277	1214	1251	1230	1184	1263	1254	1222	1213	1240	1234.8	47	50	48	43	48	41	41	41	45	47	45.1
323	1279	1219	1257	1234	1191	1270	1257	1223	1219	1242	1239.1	47	51	48	43	48	41	42	42	45	47	45.4
324	1281	1221	1257	1240	1192	1273	1260	1227	1222	1246	1241.9	48	51	49	43	49	43	42	42	46	47	46
325	1286	1226	1260	1243	1194	1281	1266	1233	1224	1250	1246.3	48	51	49	43	49	43	42	42	46	47	46
326	1290	1231	1274	1248	1195	1285	1269	1243	1230	1257	1252.2	48	51	49	43	49	44	42	42	46	47	46.1
327	1293	1239	1281	1255	1197	1290	1275	1248	1236	1263	1257.7	48	52	49	43	49	44	42	42	46	47	46.2
328	1298	1241	1282	1256	1205	1296	1277	1257	1237	1268	1261.7	48	52	49	43	49	44	42	43	46	47	46.3
329	1300	1243	1284	1259	1206	1300	1285	1260	1240	1273	1265	48	52	49	43	51	44	42	43	46	47	46.5
330	1310	1252	1288	1262	1209	1306	1292	1266	1246	1275	1270.6	50	52	49	43	52	44	42	43	46	47	46.8
331	1314	1255	1293	1266	1215	1310	1302	1270	1246	1283	1275.4	50	52	49	44	52	44	42	43	46	47	46.9
332	1318	1262	1301	1274	1222	1314	1309	1276	1251	1289	1281.6	50	52	50	44	52	44	42	43	46	47	47
333	1325	1268	1305	1280	1226	1318	1315	1282	1254	1298	1287.1	51	52	50	44	53	45	42	43	46	47	47.3
334	1331	1272	1308	1285	1231	1320	1321	1287	1260	1301	1291.6	51	52	51	44	53	45	42	43	47	47	47.5
335	1336	1276	1307	1288	1234	1327	1323	1292	1264	1304	1295.1	51	52	51	44	53	45	42	43	47	47	47.5
336	1343	1279	1309	1296	1241	1329	1326	1297	1273	1306	1299.9	51	52	51	44	54	45	43	43	47	47	47.7
337	1346	1284	1310	1300	1249	1332	1331	1304	1281	1313	1305	51	52	51	44	55	45	43	43	47	48	47.9
338	1352	1287	1321	1306	1257	1339	1340	1307	1284	1323	1311.6	51	52	51	44	55	45	43	43	47	48	47.9
339	1357	1291	1330	1311	1260	1344	1343	1313	1288	1327	1316.4	51	52	51	44	55	45	43	43	47	48	47.9
340	1362	1296	1332	1314	1263	1351	1349	1319	1290	1331	1320.7	51	53	52	44	55	46	44	44	47	48	48.4
341	1370	1299	1334	1317	1270	1354	1356	1323	1293	1335	1325.1	51	53	52	44	55	46	45	44	48	48	48.6
342	1374	1306	1336	1324	1278	1360	1357	1328	1298	1347	1330.8	51	53	52	45	57	46	45	44	48	48	48.9
343	1377	1314	1340	1329	1279	1363	1360	1333	1302	1350	1334.7	51	53	53	45	57	46	45	44	48	48	49
344	1387	1319	1347	1337	1283	1366	1361	1340	1314	1361	1341.5	51	53	54	45	57	46	45	44	48	49	49.2
345	1397	1325	1352	1341	1284	1370	1367	1345	1315	1364	1346	51	53	54	45	58	46	45	44	49	49	49.4
346	1402	1333	1356	1343	1286	1379	1373	1346	1320	1371	1350.9	51	53	54	45	59	46	45	44	49	49	49.5
347	1408	1337	1362	1349	1290	1381	1375	1350	1324	1380	1355.6	51	53	55	45	59	46	45	44	49	50	49.7
348	1413	1339	1363	1351	1295	1384	1382	1354	1326	1384	1359.1	51	53	55	45	59	48	46	44	49	50	50
349	1421	1346	1375	1356	1297	1387	1385	1361	1328	1390	1364.6	51	53	55	45	59	48	46	45	49	51	50.2
350	1426	1347	1379	1363	1300	1391	1393	1364	1332	1396	1369.1	51	53	55	45	60	48	46	45	49	51	50.3
351	1431	1352	1384	1366	1301	1394	1401	1371	1337	1400	1373.7	51	53	55	45	60	48	46	45	50	53	50.6
352	1436	1357	1386	1373	1306	1396	1409	1381	1344	1403	1379.1	51	53	56	45	60	48	46	45	50	54	50.8
353	1441	1364	1390	1378	1308	1405	1412	1384	1352	1409	1384.3	51	53	56	46	61	49	46	46	51	54	51.3
354	1446	1371	1394	1385	1312	1412	1425	1391	1359	1413	1390.8	51	54	57	46	61	49	46	46	51	55	51.6
355	1452	1376	1399	1394	1314	1413	1430	1393	1360	1415	1394.6	51	54	57	46	62	49	46	46	51	55	51.7
356	1454	1381	1402	1404	1319	1416	1435	1398	1367	1423	1399.9	51	54	57	46	64	49	46	46	51	55	51.9
357	1459	1387	1408	1405	1321	1425	1438	1403	1374	1431	1405.1	52	54	57	46	64	49	46	46	51	55	52
358	1468	1389	1415	1408	1326	1433	1449	1409	1377	1434	1410.8	53	55	57	46	64	49	46	46	51	55	52.2
359	1474	1393	1420	1412	1329	1446	1455	1415	1380	1436	1416	53	55	57	46	64	49	46	46	51	55	52.2
360	1480	1399	1424	1419	1337	1454	1463	1419	1385	1444	1422.4	53	55	57	47	65	49	48	47	51	56	52.8
361	1486	1404	1426	1426	1344	1458	1468	1424	1394	1450	1428	54	55	57	47	65	50	48	47	51	56	53
362	1492	1410	1430	1436	1350	1462	1475	1429	1397	1458	1433.9	54	55	57	47	66	50	49	48	51	56	53.3
363	1498	1413	1434	1446	1356	1468	1483	1437	1401	1464	1440	54	55	57	47	67	50	49	48	51	56	53.4
364	1505	1422	1443	1448	1361	1471	1489	1441	1407	1470	1445.7	54	56	57	47	67	50	49	48	51	56	53.5
365	1511	1426	1447	1457	1365	1478	1494	1444	1414	1476	1451.2	54	57	57	47	67	50	49	49	51	56	53.7
366	1516	1427	1454	1463	1368	1479	1499	1450	1422	1479	1455.7	54	57	57	47	67	50	49	49	51	56	53.7
367	1527	1430	1459	1468	1377	1485	1501	1460	1428	1485	1462	54	57	57	47	68	50	50	50	52	56	54.1
368	1532	1436	1462	1474	1386	1486	1503	1465	1431	1491	1466.6	54	57	57	47	69	50	51	50	53	56	54.4
369	1541	1439	1465	1480	1395	1489	1504	1468	1436	1497	1471.4	54	57	57	47	71	50	51	51	53	56	54.7
370	1543	1448	1472	1485	1402	1492	1508	1472	1441	1501	1476.4	54	57	57	47	71	50	51	51	53	56	54.7
371	1546	1452	1475	1488	1405	1502	1513	1476	1447	1505	1480.9	54	57	57	47	72	51	53	51	53	56	55.1
372	1553	1456	1481	1494	1412	1506	1519	1481	1454	1512	1486.8	54	57	58	47	72	51	53	51	54	56	55.3
373	1559	1462	1482	1499	1414	1508	1523	1484	1461	1517	1490.9	54	57	58	47	72	52	53	51	54	56	55.4
374	1563	1474	1492	1505	1418	1511	1527	1492	1465	1522	1496.9	54	57	59	47	73	53	53	52	54	56	55.8
375	1567	1488	1495	1509	1422	1512	1529	1496	1470	1530	1501.8	54	57	59	47	73	55	53	52	54	56	56
376	1573	1494	1501	1517	1429	1517	1534	1502	1475	1538	1508	54	58	59	47	73	55	54	52	54	56	56.2
377	1576	1502	1508	1522	1435	1523	1543	1506	1476	1542	1513.3	54	58	59	47	73	55	54	52	54	56	56.2
378	1585	1505	1518	1527	1440	1530	1547	1513	1483	1546	1519.4	54	58	59	47	73	55	55	52	54	56	56.3
379	1590	1508	1522	1532	1444	1535	1551	1520	1483	1551	1523.6	55	58	59	47	74	55	56	52	54	58	56.8
380	1593	1513	1524	1537	1450	1541	1554	1526	1488	1556	1528.2	55	59	59	47	74	55	56	52	54	59	57
381	1601	1520	1530	1541	1453	1545	1555	1526	1491	1560	1532.2	55	59	59	47	74	55	57	52	54	59	57.1
382	1610	1532	1533	1545	1460	1551	1562	1531	1496	1564	1538.4	55	60	59	47	74	56	57	52	54	62	57.6
383	1613	1543	1534	1552	1462	1555	1571	1538	1501	1572	1544.1	55	61	59	48	75	56	58	52	54	62	58
384	1622	1556	1544	1560	1471	1562	1582	1545	1507	1583	1553.2	55	61	59	48	75	56	58	52	54	62	58
385	1631	1562	1546	1567	1472	1568	1591	1546	1511	1585	1557.9	55	61	59	48	75	56	58	52	54	63	58.1
386	1640	1567	1548	1569	1479	1575	1599	1552	1516	1591	1563.6	55	61	59	48	75	57	58	52	54	63	58.2
387	1647	1572	1553	1578	1482	1583	1605	1557	1519	1595	1569.1	55	61	59	49	76	57	58	52	54	63	58.4
388	1652	1581	1558	1587	1492	1593	1607	1567	1525	1605	1576.7	55	61	60	49	76	57	59	52	54	64	58.7
389	1657	1587	1563	1592	1495	1599	1609	1570	1531	1611	1581.4	55	62	60	49	76	57	59	52	54	64	58.8
390	1665	1593	1566	1597	1506	1603	1614	1575	1533	1614	1586.6	55	62	60	49	77	58	59	52	55	64	59.1
391	1672	1600	1569	1602	1510	1611	1619	1578	1537	1620	1591.8	55	63	60	49	77	58	60	53	55	64	59.4
392	1680	1605	1574	1607	1517	1619	1632	1581	1541	1626	1598.2	55	63	60	49	77	58	62	54	56	64	59.8
393	1685	1610	1577	1611	1523	1624	1641	1589	1543	1631	1603.4	55	63	60	49	77	58	63	55	56	64	60
394	1698	1616	1584	1617	1529	1632	1645	1592	1553	1640	1610.6	56	63	60	51	78	58	63	55	56	64	60.4
395	1701	1620	1591	1621	1532	1636	1653	1595	1561	1643	1615.3	56	63	60	51	78	58	63	55	57	64	60.5
396	1704	1628	1598	1628	1543	1638	1661	1600	1568	1647	1621.5	56	63	60	52	78	58	63	55	57	64	60.6
397	1709	1636	1604	1630	1547	1645	1668	1608	1573	1651	1627.1	56	63	60	52	78	58	64	55	60	64	61
398	1716	1639	1613	1632	1558	1651	1671	1615	1582	1655	1633.2	57	63	60	52	78	58	64	55	60	64	61.1
399	1722	1652	1619	1641	1563	1659	1676	1617	1584	1661	1639.4	58	63	60	52	78	58	64	55	60	64	61.2
400	1727	1658	1623	1646	1567	1669	1680	1623	1594	1669	1645.6	58	63	60	53	79	58	64	56	60	65	61.6
401	1732	1661	1631	1649	1571	1672	1681	1626	1599	1676	1649.8	59	63	61	53	79	59	65	56	60	65	62
402	1739	1665	1646	1654	1580	1677	1685	1636	1603	1680	1656.5	60	63	62	53	79	59	65	56	60	66	62.3
403	1745	1671	1651	1661	1587	1678	1690	1639	1607	1683	1661.2	61	63	62	53	79	59	65	56	60	66	62.4
404	1752	1678	1657	1665	1596	1686	1702	1644	1614	1691	1668.5	61	64	62	55	79	59	65	56	61	67	62.9
405	1757	1683	1664	1671	1601	1691	1706	1650	1618	1698	1673.9	61	64	62	55	80	59	65	56	61	67	63
406	1765	1689	1669	1676	1607	1695	1712	1652	1624	1702	1679.1	61	64	62	55	80	59	66	56	61	67	63.1
407	1770	1700	1676	1680	1612	1701	1719	1658	1627	1712	1685.5	62	64	62	55	80	59	66	56	61	67	63.2
408	1774	1704	1685	1690	1614	1710	1724	1665	1628	1723	1691.7	62	64	63	55	80	59	66	56	61	67	63.3
409	1781	1709	1694	1699	1619	1719	1733	1669	1637	1729	1698.9	62	64	63	56	80	59	66	56	61	67	63.4
410	1787	1715	1705	1704	1624	1730	1740	1677	1643	1735	1706	62	65	63	56	80	59	66	56	61	68	63.6
411	1795	1719	1710	1707	1631	1737	1743	1681	1649	1739	1711.1	62	65	63	56	81	59	66	56	61	68	63.7
412	1798	1727	1713	1710	1635	1742	1747	1687	1653	1742	1715.4	62	65	63	56	81	59	66	56	61	69	63.8
413	1800	1729	1722	1713	1641	1748	1752	1691	1662	1750	1720.8	63	65	63	57	82	59	67	56	61	69	64.2
414	1808	1735	1728	1724	1649	1754	1756	1693	1666	1756	1726.9	63	66	63	57	84	59	67	56	61	69	64.5
415	1816	1744	1736	1730	1652	1761	1766	1697	1672	1763	1733.7	63	66	63	58	84	60	67	57	61	71	65
416	1820	1748	1741	1733	1655	1762	1770	1703	1681	1768	1738.1	63	66	63	58	84	60	67	57	62	71	65.1
417	1823	1755	1747	1738	1659	1770	1777	1712	1685	1770	1743.6	63	66	64	58	85	60	68	58	63	71	65.6
418	1832	1762	1757	1745	1666	1774	1784	1716	1695	1777	1750.8	63	66	64	58	86	60	68	58	63	71	65.7
419	1835	1770	1760	1750	1672	1776	1798	1722	1700	1785	1756.8	64	66	64	58	86	60	68	58	63	72	65.9
420	1840	1778	1763	1754	1682	1787	1805	1725	1701	1788	1762.3	64	66	64	58	86	60	68	58	63	72	65.9
421	1849	1782	1768	1759	1684	1792	1814	1732	1707	1795	1768.2	64	66	64	58	86	60	68	58	64	72	66
422	1855	1786	1776	1763	1693	1803	1822	1740	1714	1805	1775.7	65	67	64	58	86	61	68	58	64	72	66.3
423	1857	1793	1779	1771	1698	1809	1825	1747	1717	1812	1780.8	65	67	64	58	87	61	68	59	65	72	66.6
424	1861	1798	1790	1780	1703	1814	1829	1752	1728	1820	1787.5	65	68	64	58	87	61	68	59	65	73	66.8
425	1873	1800	1801	1787	1707	1823	1833	1759	1731	1829	1794.3	65	68	64	58	88	61	69	59	65	73	67
426	1878	1809	1809	1795	1712	1825	1837	1767	1739	1836	1800.7	65	68	64	58	88	61	69	59	65	74	67.1
427	1886	1816	1813	1803	1718	1830	1842	1779	1745	1841	1807.3	65	69	64	58	88	61	69	59	65	74	67.2
428	1892	1825	1821	1811	1725	1835	1845	1786	1749	1848	1813.7	65	69	64	58	88	62	69	59	65	74	67.3
429	1898	1829	1824	1819	1733	1842	1852	1797	1757	1852	1820.3	65	70	65	58	88	62	69	60	65	74	67.6
430	1903	1831	1830	1824	1742	1848	1858	1802	1764	1852	1825.4	65	71	65	58	88	62	69	60	65	75	67.8
431	1910	1835	1836	1832	1750	1855	1868	1813	1768	1858	1832.5	66	71	65	58	88	63	69	60	66	76	68.2
432	1914	1843	1841	1837	1758	1865	1873	1816	1774	1862	1838.3	66	71	66	58	88	63	69	60	66	76	68.3
433	1929	1853	1846	1850	1763	1874	1877	1825	1779	1870	1846.6	66	71	67	58	88	63	69	60	66	77	68.5
434	1931	1862	1856	1856	1769	1880	1884	1830	1784	1875	1852.7	66	72	67	59	88	63	69	61	67	77	68.9
435	1936	1872	1860	1860	1773	1891	1888	1834	1786	1881	1858.1	66	72	67	60	88	63	70	61	67	77	69.1
436	1941	1876	1866	1869	1780	1903	1892	1838	1790	1892	1864.7	66	72	67	60	88	63	70	61	67	77	69.1
437	1949	1886	1877	1877	1787	1908	1894	1850	1798	1897	1872.3	66	72	67	61	88	63	70	61	70	77	69.5
438	1960	1896	1883	1885	1796	1913	1899	1860	1805	1906	1880.3	66	73	67	61	89	63	70	61	70	77	69.7
439	1964	1903	1892	1891	1803	1916	1909	1864	1810	1912	1886.4	66	73	67	62	89	63	70	61	70	77	69.8
440	1967	1912	1907	1895	1813	1920	1919	1870	1814	1913	1893	66	73	67	62	89	63	70	61	71	77	69.9
441	1976	1918	1914	1910	1824	1926	1921	1875	1821	1920	1900.5	66	73	67	62	89	63	70	61	71	77	69.9
442	1984	1923	1923	1917	1831	1932	1931	1880	1831	1925	1907.7	66	74	67	62	89	64	70	61	71	77	70.1
443	1993	1932	1929	1920	1834	1934	1938	1888	1838	1932	1913.8	66	75	67	62	89	64	70	62	71	77	70.3
444	2000	1939	1933	1925	1838	1939	1944	1891	1843	1936	1918.8	68	75	67	62	89	64	70	62	71	77	70.5
445	2004	1947	1943	1930	1839	1946	1953	1896	1850	1943	1925.1	70	75	67	63	89	64	70	62	71	78	70.9
446	2010	1955	1947	1934	1842	1950	1955	1898	1858	1946	1929.5	70	76	67	63	89	64	70	62	71	78	71
447	2014	1958	1952	1944	1844	1957	1963	1908	1866	1956	1936.2	70	76	67	63	89	64	70	63	71	78	71.1
448	2019	1961	1960	1953	1845	1966	1970	1911	1873	1968	1942.6	70	76	68	63	89	64	70	63	71	78	71.2
449	2022	1970	1966	1961	1850	1972	1976	1919	1879	1976	1949.1	70	76	69	63	89	65	70	63	71	78	71.4
450	2030	1977	1971	1974	1856	1980	1986	1927	1887	1983	1957.1	70	77	70	63	89	65	70	63	71	79	71.7
451	2034	1986	1980	1982	1860	1988	1991	1932	1896	1989	1963.8	70	78	71	63	90	66	70	63	72	79	72.2
452	2042	1988	1992	1990	1871	1996	2001	1934	1905	1999	1971.8	70	78	73	63	90	66	70	63	72	80	72.5
453	2051	1993	1998	1996	1874	2007	2016	1943	1910	2003	1979.1	70	78	74	63	90	66	70	64	72	80	72.7
454	2060	2002	2013	2001	1880	2012	2022	1952	1915	2011	1986.8	72	78	74	63	90	67	70	64	72	80	73
455	2062	2007	2025	2007	1882	2016	2034	1955	1920	2021	1992.9	72	78	74	64	90	67	71	65	72	81	73.4
456	2066	2013	2028	2021	1888	2020	2040	1966	1926	2027	1999.5	72	78	74	64	90	67	71	65	72	81	73.4
457	2072	2016	2032	2032	1901	2032	2046	1976	1933	2036	2007.6	72	78	75	65	90	67	71	65	73	81	73.7
458	2079	2020	2037	2036	1905	2038	2054	1987	1936	2042	2013.4	72	78	76	65	90	67	71	65	73	81	73.8
459	2085	2026	2043	2042	1908	2045	2061	1997	1939	2053	2019.9	72	78	76	65	90	67	71	66	73	82	74
460	2095	2030	2051	2045	1912	2051	2070	1997	1946	2058	2025.5	73	78	76	66	90	67	71	66	74	84	74.5
461	2104	2036	2062	2053	1920	2059	2082	2004	1957	2067	2034.4	73	80	76	66	90	67	71	66	74	84	74.7
462	2105	2041	2069	2059	1928	2066	2088	2011	1964	2073	2040.4	73	82	76	67	90	67	71	66	74	84	75
463	2112	2050	2078	2062	1936	2076	2094	2019	1974	2080	2048.1	73	82	76	68	90	67	72	66	74	84	75.2
464	2118	2056	2086	2068	1944	2088	2101	2029	1980	2086	2055.6	73	82	76	68	90	68	72	68	75	84	75.6
465	2127	2064	2093	2074	1948	2094	2111	2034	1987	2090	2062.2	73	82	76	69	90	68	72	68	75	84	75.7
466	2132	2070	2100	2081	1956	2101	2111	2044	1998	2096	2068.9	74	83	77	70	91	68	72	68	75	84	76.2
467	2139	2080	2108	2087	1962	2107	2121	2052	2010	2102	2076.8	74	83	77	70	91	68	73	68	76	84	76.4
468	2149	2092	2113	2096	1971	2114	2131	2058	2016	2112	2085.2	75	83	77	71	91	68	73	68	76	84	76.6
469	2155	2102	2122	2104	1983	2125	2138	2067	2024	2125	2094.5	77	83	78	71	91	69	73	68	76	84	77
470	2164	2114	2134	2111	1986	2134	2146	2074	2031	2135	2102.9	77	83	78	71	92	71	73	69	77	84	77.5
471	2170	2124	2141	2120	1993	2141	2152	2081	2038	2137	2109.7	77	83	79	71	92	71	73	69	78	84	77.7
472	2184	2128	2144	2127	1998	2151	2158	2093	2046	2142	2117.1	77	83	80	71	92	71	74	69	78	84	77.9
473	2192	2132	2152	2135	2002	2164	2163	2109	2051	2148	2124.8	77	84	80	71	92	71	74	70	82	84	78.5
474	2200	2138	2163	2145	2007	2175	2168	2116	2056	2158	2132.6	77	84	80	71	92	71	74	71	82	84	78.6
475	2207	2143	2168	2154	2014	2184	2180	2128	2063	2171	2141.2	78	84	81	72	94	71	74	71	82	84	79.1
476	2218	2149	2174	2162	2023	2198	2190	2134	2070	2181	2149.9	78	85	81	72	94	71	74	71	83	85	79.4
477	2224	2158	2182	2173	2032	2204	2198	2143	2081	2190	2158.5	78	86	81	72	95	71	74	71	85	86	79.9
478	2233	2163	2191	2179	2038	2211	2206	2156	2092	2204	2167.3	79	86	81	72	95	72	75	71	85	86	80.2
479	2243	2166	2193	2182	2043	2221	2214	2162	2100	2210	2173.4	79	87	82	73	95	72	75	72	86	86	80.7
480	2249	2179	2196	2190	2050	2230	2220	2176	2105	2213	2180.8	79	88	82	73	95	73	75	73	86	86	81
481	2261	2180	2201	2199	2057	2236	2225	2182	2111	2223	2187.5	79	89	82	73	95	75	75	73	86	86	81.3
482	2267	2192	2209	2207	2069	2250	2233	2193	2121	2231	2197.2	79	90	82	73	95	75	76	73	86	86	81.5
483	2274	2209	2214	2219	2073	2263	2243	2203	2133	2240	2207.1	79	90	82	73	95	75	76	73	86	86	81.5
484	2285	2221	2221	2228	2081	2271	2252	2209	2142	2253	2216.3	79	90	82	73	95	75	76	73	86	87	81.6
485	2293	2225	2229	2232	2097	2275	2261	2219	2149	2266	2224.6	81	90	82	73	96	75	76	73	86	87	81.9
486	2303	2230	2232	2243	2108	2278	2266	2224	2155	2274	2231.3	81	91	83	73	96	75	76	73	86	87	82.1
487	2317	2236	2242	2249	2120	2284	2276	2227	2160	2280	2239.1	81	91	83	73	96	75	76	73	86	87	82.1
488	2331	2247	2251	2257	2128	2288	2281	2237	2166	2289	2247.5	82	92	84	74	98	76	76	73	86	87	82.8
489	2340	2259	2260	2261	2142	2294	2291	2245	2178	2298	2256.8	82	92	84	75	98	76	76	74	86	87	83
490	2344	2268	2270	2274	2151	2309	2304	2253	2187	2306	2266.6	83	93	86	76	99	76	76	74	86	87	83.6
491	2353	2279	2282	2283	2158	2318	2306	2261	2197	2315	2275.2	83	93	87	76	99	76	76	74	86	87	83.7
492	2361	2289	2290	2299	2176	2330	2321	2269	2210	2322	2286.7	83	93	87	76	99	76	76	75	86	87	83.8
493	2367	2294	2303	2311	2189	2338	2327	2281	2218	2333	2296.1	83	93	87	76	99	76	76	75	86	87	83.8
494	2377	2297	2310	2318	2198	2342	2336	2291	2226	2344	2303.9	83	93	87	77	100	76	76	75	87	87	84.1
495	2389	2308	2321	2330	2210	2352	2350	2296	2240	2353	2314.9	83	93	89	77	100	77	76	75	87	87	84.4
496	2398	2316	2325	2336	2217	2360	2359	2309	2250	2361	2323.1	83	96	89	77	100	78	76	75	87	88	84.9
497	2406	2323	2332	2345	2225	2373	2378	2315	2256	2371	2332.4	83	96	89	77	100	79	77	75	87	88	85.1
498	2415	2333	2341	2353	2232	2376	2387	2329	2265	2382	2341.3	83	96	90	77	101	80	77	75	87	88	85.4
499	2421	2339	2346	2362	2239	2385	2397	2340	2279	2390	2349.8	84	96	90	77	101	80	77	76	87	88	85.6
500	2432	2346	2351	2372	2254	2397	2407	2349	2289	2399	2359.6	85	96	90	77	102	80	77	77	88	88	86
501	2440	2357	2358	2378	2269	2409	2412	2362	2299	2410	2369.4	85	96	91	77	103	80	78	77	88	88	86.3
502	2451	2368	2368	2386	2278	2420	2421	2376	2307	2417	2379.2	85	96	92	77	105	80	78	77	88	90	86.8
503	2461	2372	2378	2395	2282	2429	2434	2384	2315	2429	2387.9	86	96	93	78	105	80	79	78	88	90	87.3
504	2475	2379	2387	2405	2294	2434	2445	2393	2321	2434	2396.7	86	96	93	78	105	81	79	78	88	90	87.4
505	2484	2391	2395	2415	2298	2439	2457	2404	2330	2446	2405.9	86	98	93	78	105	81	81	78	88	90	87.8
506	2489	2398	2406	2427	2308	2449	2460	2412	2336	2462	2414.7	86	98	96	78	105	82	81	78	89	90	88.3
507	2497	2403	2413	2435	2317	2458	2466	2426	2342	2477	2423.4	87	98	96	78	105	82	81	78	89	90	88.4
508	2507	2414	2427	2451	2327	2463	2475	2430	2348	2481	2432.3	89	98	96	78	106	82	81	78	90	90	88.8
509	2520	2427	2437	2461	2332	2476	2487	2438	2358	2487	2442.3	90	98	96	78	106	84	81	79	90	91	89.3
510	2526	2432	2441	2467	2340	2484	2494	2446	2363	2492	2448.5	90	98	96	79	106	85	81	79	91	91	89.6
511	2543	2438	2448	2479	2343	2493	2507	2454	2376	2504	2458.5	90	98	96	79	107	85	81	79	91	91	89.7
512	2552	2442	2456	2483	2352	2503	2520	2460	2390	2510	2466.8	92	98	96	79	107	86	81	80	91	92	90.2
513	2559	2449	2466	2493	2361	2521	2532	2469	2398	2519	2476.7	92	99	97	80	107	87	81	80	92	92	90.7
514	2569	2459	2479	2500	2368	2525	2542	2479	2411	2524	2485.6	92	100	98	80	107	87	81	80	92	93	91
515	2585	2476	2488	2509	2378	2539	2557	2486	2416	2529	2496.3	93	100	99	80	109	87	81	80	93	94	91.6
516	2592	2486	2495	2521	2386	2547	2568	2501	2428	2539	2506.3	94	100	99	80	110	87	81	81	93	94	91.9
517	2602	2496	2498	2530	2395	2557	2577	2507	2440	2546	2514.8	96	102	100	80	110	87	85	81	93	96	93
518	2609	2504	2502	2540	2405	2565	2588	2519	2446	2558	2523.6	96	103	100	80	111	87	85	81	93	96	93.2
519	2622	2517	2509	2553	2413	2575	2601	2525	2462	2571	2534.8	96	103	100	81	111	87	85	81	93	96	93.3
520	2631	2521	2517	2556	2421	2580	2612	2540	2474	2585	2543.7	96	103	100	81	111	88	85	82	93	96	93.5
521	2644	2531	2526	2573	2431	2592	2617	2555	2485	2597	2555.1	96	103	101	81	111	88	85	82	93	96	93.6
522	2654	2545	2536	2580	2443	2604	2625	2564	2489	2610	2565	96	103	102	81	111	89	86	82	94	96	94
523	2665	2552	2546	2587	2461	2615	2633	2573	2502	2625	2575.9	96	103	103	81	111	89	86	82	95	96	94.2
524	2674	2559	2556	2598	2472	2624	2640	2580	2516	2635	2585.4	97	103	103	81	111	89	87	82	95	96	94.4
525	2688	2569	2567	2607	2485	2631	2646	2589	2522	2641	2594.5	97	104	103	81	112	89	88	83	95	97	94.9
526	2697	2579	2577	2613	2496	2641	2661	2602	2532	2654	2605.2	97	104	103	81	112	90	88	83	95	97	95
527	2711	2590	2583	2625	2507	2649	2674	2616	2541	2664	2616	97	105	103	81	113	90	89	83	96	98	95.5
528	2725	2598	2596	2634	2517	2658	2681	2619	2550	2670	2624.8	97	105	103	81	115	91	89	84	96	98	95.9
529	2734	2607	2599	2646	2520	2667	2690	2632	2557	2681	2633.3	97	105	103	81	115	91	89	84	98	98	96.1
530	2747	2619	2605	2655	2536	2679	2708	2639	2566	2688	2644.2	97	105	103	83	117	91	90	84	98	99	96.7
531	2756	2626	2610	2665	2541	2688	2716	2654	2580	2700	2653.6	97	105	103	84	118	91	90	85	98	99	97
532	2764	2635	2617	2677	2551	2704	2725	2660	2585	2715	2663.3	97	105	103	84	118	91	90	85	98	99	97
533	2772	2647	2627	2691	2559	2710	2732	2668	2591	2723	2672	97	105	103	84	118	91	90	85	98	99	97
534	2790	2656	2632	2696	2563	2718	2744	2679	2605	2729	2681.2	98	106	103	84	119	92	90	86	98	99	97.5
535	2799	2666	2641	2708	2570	2733	2753	2687	2613	2737	2690.7	98	106	104	84	120	92	90	86	99	99	97.8
536	2810	2680	2647	2723	2578	2751	2761	2698	2621	2744	2701.3	98	107	104	84	121	92	90	86	99	99	98
537	2821	2683	2663	2731	2589	2760	2769	2708	2629	2757	2711	98	107	104	85	122	93	90	86	100	99	98.4
538	2831	2694	2672	2739	2601	2776	2782	2721	2635	2768	2721.9	98	107	104	85	123	93	90	88	100	99	98.7
539	2838	2701	2683	2750	2613	2788	2792	2729	2641	2771	2730.6	99	107	104	87	124	93	91	88	100	99	99.2
540	2849	2709	2690	2757	2618	2798	2800	2736	2650	2778	2738.5	99	107	104	89	125	93	91	88	101	100	99.7
541	2860	2719	2699	2765	2626	2802	2818	2749	2663	2789	2749	99	107	105	89	125	94	91	88	102	100	100
542	2873	2728	2704	2776	2634	2812	2826	2757	2671	2798	2757.9	99	107	106	89	125	95	92	88	102	100	100.3
543	2885	2741	2713	2791	2649	2819	2834	2763	2681	2804	2768	99	107	106	89	126	95	92	88	102	100	100.4
544	2897	2750	2719	2799	2661	2830	2845	2774	2693	2816	2778.4	100	108	106	89	129	95	94	88	102	101	101.2
545	2905	2758	2731	2811	2667	2838	2860	2779	2700	2829	2787.8	101	108	107	90	129	95	94	89	102	104	101.9
546	2917	2767	2744	2821	2676	2855	2864	2787	2707	2840	2797.8	104	108	107	91	131	96	96	90	102	106	103.1
547	2924	2778	2753	2835	2685	2863	2876	2802	2718	2848	2808.2	104	108	107	91	132	98	98	90	102	107	103.7
548	2933	2787	2766	2848	2693	2876	2885	2810	2725	2861	2818.4	104	108	108	91	132	99	98	90	102	107	103.9
549	2946	2800	2778	2856	2705	2895	2890	2823	2733	2874	2830	104	111	108	91	133	100	98	90	103	108	104.6
550	2954	2808	2796	2865	2708	2902	2899	2837	2750	2882	2840.1	104	111	108	92	134	101	98	91	103	108	105
551	2965	2819	2807	2871	2716	2910	2910	2844	2758	2896	2849.6	104	111	108	92	135	101	99	93	104	108	105.5
552	2979	2832	2812	2880	2725	2921	2918	2850	2764	2904	2858.5	104	111	108	92	135	101	100	94	105	108	105.8
553	2992	2843	2820	2889	2737	2929	2926	2860	2776	2909	2868.1	104	112	108	93	135	101	100	94	105	109	106.1
554	3006	2848	2831	2901	2745	2939	2934	2876	2791	2925	2879.6	104	112	108	94	136	101	100	95	105	109	106.4
555	3017	2859	2837	2912	2755	2948	2951	2890	2800	2939	2890.8	104	112	108	94	137	101	101	95	106	111	106.9
556	3026	2871	2843	2925	2760	2962	2957	2899	2808	2947	2899.8	104	112	108	95	137	101	101	96	106	111	107.1
557	3032	2884	2865	2938	2765	2976	2966	2911	2823	2964	2912.4	104	114	108	95	137	101	102	97	106	112	107.6
558	3047	2900	2879	2950	2779	2991	2973	2921	2833	2976	2924.9	104	115	108	95	138	101	105	97	106	113	108.2
559	3062	2910	2889	2960	2789	3004	2990	2929	2845	2989	2936.7	104	116	108	95	138	102	106	98	106	113	108.6
560	3072	2926	2897	2969	2800	3023	3002	2941	2853	2997	2948	104	116	108	95	138	102	107	98	106	114	108.8
561	3080	2948	2904	2976	2808	3037	3006	2950	2868	3012	2958.9	104	116	108	95	139	103	109	99	108	116	109.7
562	3088	2954	2919	2984	2819	3044	3012	2960	2883	3019	2968.2	106	116	108	95	140	104	109	99	108	117	110.2
563	3099	2961	2930	2995	2829	3057	3031	2968	2887	3026	2978.3	106	117	108	95	140	104	110	100	108	118	110.6
564	3112	2979	2937	3003	2840	3066	3039	2980	2893	3036	2988.5	107	117	108	96	140	104	111	100	108	119	111
565	3120	2991	2952	3017	2851	3075	3049	2989	2903	3045	2999.2	107	117	108	96	140	104	113	100	108	119	111.2
566	3132	3002	2964	3029	2863	3087	3065	2995	2917	3056	3011	107	117	108	96	141	106	113	100	108	119	111.5
567	3140	3011	2974	3041	2872	3098	3071	3009	2925	3063	3020.4	107	118	108	97	141	106	113	101	108	120	111.9
568	3153	3025	2983	3051	2880	3115	3090	3018	2934	3078	3032.7	108	118	108	97	141	106	113	103	108	120	112.2
569	3164	3037	2996	3058	2890	3129	3101	3029	2942	3088	3043.4	109	118	108	98	143	107	113	104	109	120	112.9
570	3172	3047	3011	3071	2903	3137	3115	3034	2955	3102	3054.7	109	118	109	100	143	107	114	105	109	121	113.5
571	3181	3054	3031	3077	2910	3144	3124	3040	2965	3118	3064.4	109	118	109	100	143	107	114	105	109	121	113.5
572	3188	3063	3046	3085	2918	3156	3136	3049	2980	3137	3075.8	109	118	110	100	143	108	114	106	109	121	113.8
573	3199	3075	3055	3093	2929	3167	3151	3055	2989	3149	3086.2	109	118	111	101	143	108	115	106	110	121	114.2
574	3212	3085	3067	3107	2934	3180	3162	3062	2996	3159	3096.4	110	118	112	101	143	108	117	106	110	122	114.7
575	3219	3097	3084	3121	2949	3187	3167	3067	3004	3167	3106.2	110	118	112	101	144	109	117	106	110	123	115
576	3236	3113	3092	3131	2963	3197	3182	3073	3018	3179	3118.4	111	119	112	101	145	109	117	106	111	124	115.5
577	3251	3122	3107	3144	2977	3209	3190	3087	3028	3198	3131.3	111	121	112	101	145	109	117	106	111	124	115.7
578	3257	3136	3126	3162	2987	3224	3200	3099	3043	3209	3144.3	111	121	113	102	145	109	117	106	113	124	116.1
579	3270	3145	3138	3175	2995	3239	3211	3113	3052	3218	3155.6	112	121	114	104	147	110	117	106	113	124	116.8
580	3286	3152	3147	3185	3007	3251	3218	3123	3062	3231	3166.2	113	122	114	104	147	110	117	107	113	125	117.2
581	3297	3164	3161	3193	3012	3262	3234	3129	3068	3240	3176	113	122	115	104	147	110	119	107	114	126	117.7
582	3304	3178	3166	3201	3030	3274	3247	3140	3071	3253	3186.4	113	124	115	104	148	110	119	107	115	126	118.1
583	3321	3188	3177	3215	3040	3287	3259	3152	3082	3268	3198.9	113	124	115	105	149	110	119	107	115	127	118.4
584	3326	3199	3186	3222	3044	3300	3271	3167	3090	3276	3208.1	113	124	115	106	150	110	119	107	117	127	118.8
585	3334	3216	3198	3234	3059	3312	3281	3178	3106	3285	3220.3	114	125	115	106	150	110	120	107	117	128	119.2
586	3350	3227	3213	3246	3066	3330	3298	3195	3110	3294	3232.9	115	126	115	106	150	110	121	108	117	128	119.6
587	3360	3241	3225	3253	3075	3345	3308	3207	3115	3302	3243.1	117	127	115	106	152	110	121	108	117	128	120.1
588	3376	3256	3243	3268	3085	3353	3327	3220	3123	3313	3256.4	117	130	116	106	153	110	121	108	118	128	120.7
589	3390	3261	3257	3280	3094	3365	3340	3226	3130	3333	3267.6	117	130	119	106	154	110	121	108	118	128	121.1
590	3398	3273	3271	3296	3101	3378	3356	3232	3146	3345	3279.6	117	131	119	108	154	110	122	108	120	128	121.7
591	3401	3285	3284	3307	3115	3386	3365	3244	3154	3351	3289.2	119	131	119	111	154	110	123	108	120	128	122.3
592	3412	3293	3292	3316	3133	3397	3378	3256	3162	3357	3299.6	119	131	119	113	154	111	124	108	120	132	123.1
593	3426	3308	3301	3333	3152	3407	3394	3265	3175	3371	3313.2	119	131	120	116	154	111	124	108	120	132	123.5
594	3433	3323	3323	3342	3156	3410	3405	3274	3182	3385	3323.3	119	132	121	116	154	111	124	108	121	133	123.9
595	3444	3340	3340	3358	3165	3420	3424	3283	3196	3402	3337.2	120	135	122	116	154	111	124	108	121	135	124.6
596	3458	3352	3350	3367	3177	3437	3437	3292	3204	3412	3348.6	121	135	122	116	154	111	124	108	122	137	125
597	3468	3373	3365	3374	3183	3452	3447	3300	3219	3424	3360.5	122	135	123	116	154	112	124	108	122	138	125.4
598	3482	3382	3378	3379	3193	3462	3462	3316	3232	3439	3372.5	122	135	123	117	156	112	125	108	122	138	125.8
599	3492	3395	3392	3390	3199	3473	3464	3328	3248	3451	3383.2	123	135	123	117	156	112	125	108	122	138	125.9
600	3504	3407	3407	3401	3213	3484	3474	3336	3256	3459	3394.1	123	136	123	117	157	113	125	110	122	140	126.6
601	3518	3419	3418	3412	3226	3491	3486	3355	3264	3474	3406.3	124	136	123	118	157	113	125	110	122	141	126.9
602	3529	3429	3430	3423	3232	3502	3498	3361	3277	3491	3417.2	124	136	124	118	157	113	125	111	122	141	127.1
603	3540	3447	3441	3436	3246	3508	3506	3383	3288	3506	3430.1	124	137	124	119	158	115	125	111	123	141	127.7
604	3553	3460	3457	3444	3258	3518	3518	3399	3300	3521	3442.8	125	138	124	119	159	116	125	111	123	141	128.1
605	3564	3475	3465	3455	3271	3532	3529	3411	3315	3530	3454.7	125	138	124	119	159	117	125	111	124	141	128.3
606	3568	3487	3480	3472	3284	3545	3545	3421	3331	3542	3467.5	126	138	124	119	159	117	126	112	124	141	128.6
607	3580	3499	3495	3487	3288	3554	3554	3434	3343	3554	3478.8	126	138	125	119	159	117	127	112	125	141	128.9
608	3595	3514	3506	3494	3298	3561	3570	3444	3355	3567	3490.4	126	140	126	119	159	117	128	112	125	141	129.3
609	3610	3524	3512	3511	3313	3574	3583	3455	3371	3579	3503.2	127	140	127	119	160	117	128	112	125	143	129.8
610	3628	3536	3525	3527	3324	3590	3594	3467	3387	3586	3516.4	129	141	128	119	162	118	128	112	125	143	130.5
611	3639	3544	3544	3543	3335	3604	3606	3484	3400	3601	3530	130	141	130	119	164	120	128	112	126	143	131.3
612	3651	3557	3562	3560	3343	3612	3615	3492	3409	3606	3540.7	130	141	130	119	164	120	129	113	127	144	131.7
613	3670	3569	3575	3571	3348	3620	3635	3508	3417	3613	3552.6	131	142	130	119	165	121	129	113	127	144	132.1
614	3677	3583	3590	3585	3359	3630	3646	3519	3429	3620	3563.8	131	142	131	119	165	122	130	113	129	144	132.6
615	3683	3597	3605	3598	3368	3642	3656	3532	3441	3637	3575.9	131	142	132	119	165	122	130	113	129	144	132.7
616	3697	3616	3616	3615	3380	3653	3676	3546	3448	3645	3589.2	131	143	132	120	165	122	131	114	131	146	133.5
617	3713	3627	3634	3633	3387	3665	3689	3561	3456	3661	3602.6	132	143	132	120	165	122	131	114	131	147	133.7
618	3721	3646	3650	3643	3401	3672	3703	3576	3480	3672	3616.4	132	143	133	120	166	122	132	114	132	147	134.1
619	3739	3657	3662	3654	3418	3683	3716	3587	3491	3683	3629	133	145	135	120	166	122	132	114	132	147	134.6
620	3757	3672	3678	3665	3426	3692	3731	3604	3499	3696	3642	133	147	136	120	166	123	133	114	133	147	135.2
621	3773	3689	3690	3679	3438	3704	3738	3615	3517	3714	3655.7	134	148	136	120	167	123	133	115	134	148	135.8
622	3788	3702	3702	3692	3453	3720	3745	3627	3527	3722	3667.8	134	148	136	120	168	124	133	115	134	149	136.1
623	3803	3715	3714	3705	3462	3730	3759	3638	3540	3742	3680.8	134	151	136	121	168	126	133	115	135	149	136.8
624	3815	3732	3738	3718	3476	3743	3780	3653	3548	3752	3695.5	137	151	137	122	168	127	133	116	135	149	137.5
625	3830	3751	3749	3733	3492	3751	3790	3665	3558	3765	3708.4	137	152	137	123	170	127	133	117	135	149	138
626	3842	3758	3764	3743	3501	3765	3799	3682	3570	3782	3720.6	137	152	139	123	171	127	134	118	135	150	138.6
627	3856	3769	3775	3756	3507	3780	3816	3703	3582	3796	3734	138	152	140	123	172	128	134	120	137	150	139.4
628	3875	3780	3792	3768	3522	3793	3833	3718	3600	3807	3748.8	138	152	141	123	173	128	134	120	137	151	139.7
629	3892	3791	3813	3779	3531	3806	3841	3730	3613	3815	3761.1	138	152	141	123	173	128	134	120	137	153	139.9
630	3906	3797	3836	3794	3543	3820	3851	3743	3623	3824	3773.7	138	152	141	123	174	128	135	120	138	153	140.2
631	3924	3814	3847	3810	3558	3829	3859	3759	3639	3847	3788.6	138	152	141	123	175	128	135	121	139	154	140.6
632	3933	3829	3860	3822	3569	3853	3868	3775	3652	3865	3802.6	138	152	142	123	175	128	136	122	139	154	140.9
633	3944	3850	3875	3839	3585	3865	3882	3788	3669	3880	3817.7	138	153	144	125	175	130	136	123	140	154	141.8
634	3955	3868	3888	3848	3600	3889	3897	3804	3684	3901	3833.4	138	155	144	126	175	130	136	123	140	154	142.1
635	3971	3874	3901	3859	3612	3908	3914	3818	3697	3918	3847.2	138	157	145	127	175	130	136	124	142	154	142.8
636	3982	3883	3918	3868	3630	3924	3927	3831	3708	3932	3860.3	138	158	145	127	175	130	136	124	143	155	143.1
637	3997	3896	3930	3883	3648	3945	3938	3847	3725	3946	3875.5	139	159	145	127	175	130	136	124	143	155	143.3
638	4011	3915	3945	3892	3655	3959	3948	3871	3735	3964	3889.5	139	160	146	127	176	130	137	124	143	156	143.8
639	4025	3930	3958	3920	3669	3975	3967	3889	3752	3980	3906.5	139	160	147	127	177	131	137	124	143	157	144.2
640	4035	3941	3974	3939	3681	3991	3984	3907	3771	3989	3921.2	139	160	148	127	177	132	137	126	144	157	144.7
641	4048	3956	3992	3952	3702	4012	3999	3931	3784	4000	3937.6	140	160	148	128	178	132	137	126	144	157	145
642	4061	3970	4001	3970	3721	4026	4019	3948	3797	4019	3953.2	141	161	149	129	178	133	140	126	144	157	145.8
643	4068	3981	4019	3994	3737	4043	4034	3965	3820	4036	3969.7	141	161	149	130	180	133	141	127	145	157	146.4
644	4086	3997	4035	4006	3754	4060	4056	3986	3830	4047	3985.7	142	163	149	132	181	134	142	127	145	157	147.2
645	4110	4008	4048	4020	3764	4073	4073	3997	3840	4058	3999.1	142	165	149	132	181	134	142	129	146	158	147.8
646	4124	4020	4062	4031	3779	4096	4084	4012	3849	4067	4012.4	142	166	150	133	181	135	142	129	146	158	148.2
647	4147	4028	4072	4041	3787	4110	4098	4021	3864	4079	4024.7	143	166	151	133	181	135	142	129	151	158	148.9
648	4162	4041	4089	4055	3803	4120	4118	4037	3873	4094	4039.2	144	167	151	133	181	136	142	130	151	158	149.3
649	4180	4053	4099	4068	3819	4130	4134	4051	3881	4104	4051.9	144	167	151	134	181	136	142	130	151	159	149.5
650	4199	4063	4111	4083	3823	4145	4147	4065	3892	4120	4064.8	144	167	151	134	181	138	142	131	151	159	149.8
651	4215	4079	4123	4105	3834	4156	4166	4084	3908	4134	4080.4	144	167	152	134	181	138	142	132	152	159	150.1
652	4232	4093	4138	4122	3850	4173	4189	4108	3928	4151	4098.4	145	167	152	136	184	138	142	133	152	159	150.8
653	4249	4116	4151	4142	3877	4185	4208	4128	3948	4167	4117.1	145	168	152	136	185	140	142	133	152	160	151.3
654	4266	4127	4163	4162	3896	4199	4221	4146	3961	4183	4132.4	146	170	153	137	185	142	142	134	152	160	152.1
655	4282	4146	4174	4179	3910	4224	4236	4155	3975	4200	4148.1	146	170	153	137	185	142	142	135	156	160	152.6
656	4297	4159	4184	4196	3930	4245	4251	4164	3988	4220	4163.4	146	170	155	137	186	145	142	135	157	160	153.3
657	4313	4172	4196	4222	3940	4258	4264	4172	4005	4239	4178.1	146	171	158	137	187	145	142	136	157	160	153.9
658	4332	4182	4212	4238	3956	4272	4276	4185	4025	4257	4193.5	148	172	158	138	187	146	143	137	158	161	154.8
659	4347	4205	4227	4248	3969	4290	4293	4201	4042	4282	4210.4	148	175	158	138	187	146	143	137	159	161	155.2
660	4364	4218	4237	4263	3981	4304	4310	4218	4056	4297	4224.8	148	175	158	138	187	146	144	137	160	161	155.4
661	4380	4235	4247	4280	3996	4311	4323	4239	4072	4312	4239.5	149	177	158	139	188	148	145	137	162	161	156.4
662	4391	4249	4262	4292	4021	4332	4337	4252	4085	4328	4254.9	150	177	158	140	190	149	147	137	164	163	157.5
663	4415	4269	4278	4314	4035	4348	4359	4272	4098	4343	4273.1	150	177	159	140	190	150	147	137	164	163	157.7
664	4427	4282	4292	4332	4052	4365	4370	4294	4116	4357	4288.7	150	178	159	140	190	151	148	138	164	164	158.2
665	4438	4299	4304	4345	4071	4383	4381	4307	4136	4374	4303.8	150	178	161	140	191	151	149	140	164	165	158.9
666	4456	4317	4319	4357	4082	4397	4401	4325	4151	4390	4319.5	151	178	162	140	191	151	149	140	165	166	159.3
667	4471	4332	4334	4374	4091	4417	4415	4338	4166	4400	4333.8	151	179	162	142	193	151	149	140	166	166	159.9
668	4483	4356	4351	4387	4107	4428	4427	4356	4178	4417	4349	151	179	163	142	193	151	150	140	168	166	160.3
669	4504	4361	4370	4400	4121	4439	4445	4373	4191	4431	4363.5	152	179	163	143	193	151	150	141	168	166	160.6
670	4527	4373	4383	4416	4134	4458	4463	4388	4211	4446	4379.9	152	179	165	143	197	151	151	143	168	166	161.5
671	4549	4391	4398	4430	4154	4469	4476	4400	4226	4458	4395.1	154	180	165	144	197	152	152	146	168	167	162.5
672	4565	4408	4408	4445	4173	4482	4489	4420	4235	4470	4409.5	156	181	165	144	197	153	152	146	171	168	163.3
673	4576	4421	4427	4461	4192	4499	4511	4438	4259	4492	4427.6	156	182	165	145	197	153	154	147	172	168	163.9
674	4585	4434	4444	4479	4211	4517	4527	4454	4276	4516	4444.3	157	183	165	146	197	154	155	147	173	170	164.7
675	4603	4453	4463	4501	4231	4540	4552	4472	4288	4535	4463.8	157	184	165	146	198	158	157	149	173	172	165.9
676	4620	4469	4481	4514	4251	4545	4570	4489	4304	4545	4478.8	158	184	166	147	198	159	158	150	173	173	166.6
677	4636	4486	4489	4523	4269	4568	4586	4501	4317	4558	4493.3	158	184	166	147	198	161	158	150	174	173	166.9
678	4652	4507	4500	4543	4287	4584	4611	4515	4339	4571	4510.9	159	184	168	148	200	161	159	151	175	173	167.8
679	4673	4525	4522	4562	4304	4601	4627	4521	4361	4592	4528.8	159	184	169	148	201	162	159	153	175	174	168.4
680	4696	4538	4530	4577	4316	4613	4647	4534	4383	4610	4544.4	159	184	169	148	202	163	160	153	175	175	168.8
681	4721	4550	4543	4596	4336	4628	4668	4551	4397	4625	4561.5	159	184	170	148	203	163	160	153	175	177	169.2
682	4739	4565	4561	4619	4360	4648	4681	4574	4424	4644	4581.5	159	184	171	148	203	164	160	154	176	177	169.6
683	4765	4577	4580	4635	4373	4662	4695	4594	4445	4668	4599.4	159	184	172	150	203	166	160	154	179	177	170.4
684	4785	4593	4594	4652	4392	4681	4716	4613	4461	4687	4617.4	159	184	173	152	205	166	160	156	179	178	171.2
685	4807	4607	4613	4679	4399	4693	4729	4630	4478	4704	4633.9	161	186	175	152	207	167	161	156	180	178	172.3
686	4823	4621	4629	4694	4417	4715	4750	4644	4493	4721	4650.7	162	186	175	153	209	167	162	157	182	179	173.2
687	4837	4637	4651	4710	4431	4734	4766	4661	4503	4737	4666.7	163	188	175	153	210	167	162	157	182	180	173.7
688	4858	4657	4657	4724	4443	4755	4778	4677	4523	4753	4682.5	164	188	176	154	210	167	162	158	183	180	174.2
689	4874	4672	4676	4737	4462	4766	4799	4690	4540	4780	4699.6	164	188	176	154	211	167	162	158	185	181	174.6
690	4894	4701	4688	4757	4479	4788	4815	4703	4565	4795	4718.5	165	189	176	154	211	167	163	159	185	181	175
691	4911	4718	4710	4777	4493	4805	4825	4719	4578	4812	4734.8	166	189	178	155	211	167	164	159	185	181	175.5
692	4933	4747	4728	4789	4504	4823	4851	4740	4596	4825	4753.6	167	191	178	155	212	167	164	159	186	182	176.1
693	4954	4760	4738	4813	4520	4844	4870	4753	4617	4839	4770.8	167	191	178	157	212	167	164	159	186	182	176.3
694	4971	4782	4764	4828	4541	4866	4893	4780	4627	4853	4790.5	170	194	179	158	213	170	164	159	186	182	177.5
695	4992	4791	4782	4850	4562	4884	4906	4803	4642	4877	4808.9	170	194	180	158	214	171	165	162	187	182	178.3
696	5013	4813	4799	4864	4584	4900	4934	4821	4654	4902	4828.4	172	195	180	158	215	172	166	162	188	182	179
697	5035	4826	4817	4884	4596	4914	4945	4841	4678	4919	4845.5	172	195	180	158	215	173	166	162	188	182	179.1
698	5057	4845	4828	4912	4615	4930	4961	4859	4691	4944	4864.2	174	196	182	158	215	174	166	162	191	182	180
699	5072	4868	4853	4930	4627	4943	4988	4884	4707	4967	4883.9	174	196	182	159	216	174	167	162	191	184	180.5
700	5094	4894	4869	4952	4653	4966	5014	4895	4722	4983	4904.2	175	196	184	160	217	174	168	162	193	185	181.4
701	5109	4915	4891	4969	4672	4981	5037	4911	4739	4998	4922.2	176	197	185	160	217	174	168	163	193	186	181.9
702	5136	4927	4911	4995	4690	5000	5053	4936	4755	5018	4942.1	176	197	186	161	217	174	169	163	193	186	182.2
703	5151	4939	4923	5012	4710	5027	5078	4952	4774	5040	4960.6	177	198	187	161	218	175	170	164	193	186	182.9
704	5169	4954	4939	5029	4724	5039	5100	4973	4785	5056	4976.8	179	199	188	161	218	176	173	164	194	187	183.9
705	5184	4977	4963	5049	4734	5060	5118	4989	4813	5072	4995.9	179	199	188	161	218	176	173	165	194	188	184.1
706	5211	5000	4978	5075	4748	5078	5136	5013	4824	5093	5015.6	179	199	188	161	218	176	175	165	194	188	184.3
707	5231	5015	4994	5090	4768	5098	5158	5029	4840	5102	5032.5	180	202	188	161	219	177	175	166	195	188	185.1
708	5254	5035	5006	5114	4784	5118	5172	5039	4858	5123	5050.3	181	204	188	161	221	178	175	167	195	188	185.8
709	5278	5052	5017	5130	4808	5143	5192	5058	4875	5143	5069.6	181	205	189	162	223	178	177	167	195	189	186.6
710	5300	5067	5034	5148	4829	5158	5209	5078	4890	5156	5086.9	181	206	189	162	224	178	177	169	195	189	187
711	5313	5083	5055	5160	4841	5177	5220	5098	4909	5173	5102.9	184	206	191	163	225	178	178	169	199	191	188.4
712	5329	5106	5073	5174	4852	5194	5232	5121	4931	5194	5120.6	184	206	191	163	228	178	178	169	200	192	188.9
713	5342	5126	5084	5193	4870	5213	5252	5131	4955	5215	5138.1	184	206	192	163	230	178	179	170	200	192	189.4
714	5359	5149	5102	5213	4887	5228	5273	5147	4977	5239	5157.4	184	206	193	163	233	178	180	172	200	192	190.1
715	5383	5164	5124	5230	4911	5250	5293	5170	4986	5260	5177.1	184	207	194	163	233	181	181	172	200	192	190.7
716	5404	5181	5144	5249	4922	5271	5315	5184	5008	5281	5195.9	185	207	194	163	235	181	181	172	200	193	191.1
717	5434	5197	5153	5262	4938	5284	5335	5197	5023	5297	5212	185	207	194	163	236	182	182	173	200	193	191.5
718	5452	5207	5172	5284	4960	5304	5348	5218	5038	5311	5229.4	185	207	194	164	238	183	182	173	201	193	192
719	5471	5228	5184	5300	4978	5324	5365	5242	5056	5342	5249	187	207	195	165	240	185	183	173	201	194	193
720	5495	5252	5201	5325	4993	5341	5383	5255	5072	5350	5266.7	188	208	195	166	241	187	185	174	201	196	194.1
721	5513	5272	5214	5344	5011	5360	5403	5272	5090	5362	5284.1	188	210	195	166	242	189	185	175	202	199	195.1
722	5537	5291	5237	5374	5030	5387	5416	5289	5102	5389	5305.2	188	212	195	166	242	190	186	175	204	201	195.9
723	5557	5308	5253	5390	5052	5417	5434	5308	5118	5413	5325	189	212	196	166	245	190	187	175	205	203	196.8
724	5577	5331	5273	5409	5067	5454	5452	5324	5132	5443	5346.2	190	214	197	168	247	191	187	175	205	204	197.8
725	5603	5349	5304	5430	5078	5477	5473	5342	5148	5461	5366.5	190	215	197	168	247	192	187	176	205	205	198.2
726	5624	5370	5320	5450	5093	5498	5496	5356	5177	5484	5386.8	190	217	198	169	248	192	187	177	206	207	199.1
727	5635	5389	5338	5468	5106	5516	5512	5379	5200	5500	5404.3	191	217	200	169	250	193	188	177	206	208	199.9
728	5650	5409	5358	5484	5125	5530	5523	5398	5222	5517	5421.6	192	218	201	170	250	193	189	177	206	210	200.6
729	5678	5429	5375	5497	5156	5552	5546	5413	5240	5540	5442.6	193	218	204	170	250	193	189	178	206	211	201.2
730	5698	5445	5407	5523	5174	5580	5566	5434	5264	5555	5464.6	195	221	205	172	251	193	191	178	210	213	202.9
731	5712	5464	5426	5539	5195	5600	5590	5447	5281	5580	5483.4	195	223	205	173	251	193	192	178	210	216	203.6
732	5731	5485	5446	5561	5208	5613	5608	5469	5295	5594	5501	196	225	206	174	253	193	192	179	210	217	204.5
733	5755	5507	5457	5581	5227	5632	5636	5492	5321	5623	5523.1	198	226	209	174	254	193	193	181	211	217	205.6
734	5774	5529	5478	5600	5248	5654	5652	5514	5342	5646	5543.7	198	226	209	176	257	193	195	183	212	219	206.8
735	5798	5557	5495	5609	5265	5681	5673	5541	5360	5666	5564.5	198	227	210	176	260	193	196	183	212	220	207.5
736	5823	5574	5506	5634	5287	5696	5704	5559	5379	5690	5585.2	200	227	211	177	261	193	198	184	212	220	208.3
737	5838	5598	5531	5656	5299	5721	5724	5579	5399	5720	5606.5	200	228	212	179	263	195	199	184	213	221	209.4
738	5857	5611	5543	5676	5321	5744	5747	5596	5416	5732	5624.3	201	229	213	180	265	195	201	185	215	221	210.5
739	5876	5640	5561	5697	5337	5763	5776	5609	5440	5757	5645.6	203	230	213	180	267	196	202	186	215	223	211.5
740	5897	5662	5588	5713	5350	5784	5797	5636	5451	5775	5665.3	204	230	213	181	269	196	204	187	215	225	212.4
741	5921	5693	5613	5732	5367	5797	5821	5655	5471	5790	5686	204	231	213	182	269	197	207	187	215	227	213.2
742	5942	5716	5642	5751	5378	5816	5846	5672	5487	5814	5706.4	204	231	213	182	270	197	209	189	215	227	213.7
743	5963	5745	5665	5770	5396	5834	5873	5686	5506	5827	5726.5	204	232	215	184	272	198	212	191	216	229	215.3
744	5980	5757	5689	5789	5416	5850	5898	5706	5525	5845	5745.5	206	233	215	185	273	198	212	192	217	231	216.2
745	6008	5779	5706	5815	5426	5876	5916	5722	5542	5873	5766.3	207	235	215	187	277	198	212	193	217	231	217.2
746	6031	5800	5729	5837	5446	5896	5927	5740	5561	5889	5785.6	208	235	216	188	278	198	213	193	217	232	217.8
747	6049	5818	5750	5863	5476	5917	5950	5762	5567	5908	5806	210	237	216	188	279	199	215	195	217	232	218.8
748	6065	5841	5768	5882	5491	5938	5972	5779	5587	5924	5824.7	210	239	217	189	280	200	216	195	218	233	219.7
749	6087	5852	5794	5903	5511	5960	5993	5791	5604	5942	5843.7	211	240	217	190	280	200	216	195	218	235	220.2
750	6114	5875	5820	5925	5533	5995	6010	5811	5626	5960	5866.9	211	240	218	190	281	200	217	198	218	235	220.8
751	6141	5900	5835	5946	5551	6022	6026	5826	5644	5983	5887.4	212	240	218	191	281	200	217	201	219	236	221.5
752	6158	5922	5852	5957	5572	6036	6047	5848	5668	6007	5906.7	213	242	219	192	283	201	217	201	220	237	222.5
753	6179	5947	5875	5981	5589	6057	6064	5870	5677	6033	5927.2	213	242	219	192	283	201	217	201	221	237	222.6
754	6199	5968	5900	6003	5610	6078	6088	5890	5698	6054	5948.8	214	242	219	192	284	202	217	202	222	238	223.2
755	6230	5987	5917	6023	5634	6106	6114	5913	5712	6082	5971.8	214	242	219	192	284	203	218	202	223	238	223.5
756	6255	6009	5932	6037	5647	6138	6139	5937	5737	6101	5993.2	215	242	219	193	284	204	219	202	223	240	224.1
757	6277	6027	5961	6054	5672	6161	6149	5957	5763	6121	6014.2	215	242	220	194	284	204	219	202	223	243	224.6
758	6295	6044	5985	6071	5695	6183	6175	5980	5783	6143	6035.4	217	242	220	194	284	205	222	202	223	244	225.3
759	6323	6064	6007	6094	5713	6213	6192	6004	5802	6170	6058.2	217	244	221	195	284	207	222	203	224	244	226.1
760	6339	6098	6027	6119	5728	6235	6207	6026	5826	6196	6080.1	217	244	223	197	284	208	222	203	226	246	227
761	6354	6121	6059	6138	5745	6261	6230	6053	5847	6224	6103.2	220	245	223	197	284	208	222	203	228	247	227.7
762	6375	6146	6076	6156	5763	6280	6243	6077	5869	6252	6123.7	220	245	223	198	286	209	224	203	229	249	228.6
763	6394	6171	6112	6180	5780	6297	6270	6101	5895	6288	6148.8	223	246	225	200	288	210	224	203	230	249	229.8
764	6421	6192	6133	6198	5806	6314	6284	6122	5911	6309	6169	225	247	226	202	291	211	224	205	232	249	231.2
765	6437	6220	6164	6226	5831	6338	6308	6145	5930	6331	6193	225	248	227	206	292	213	225	205	233	250	232.4
766	6465	6249	6191	6255	5848	6366	6329	6171	5946	6356	6217.6	225	251	227	209	292	213	225	205	236	251	233.4
767	6487	6269	6220	6285	5862	6392	6350	6188	5968	6378	6239.9	227	252	227	210	292	214	225	206	236	251	234
768	6506	6296	6249	6311	5881	6415	6373	6201	5989	6398	6261.9	229	252	227	213	292	215	227	208	236	251	235
769	6525	6315	6266	6341	5899	6436	6394	6222	6017	6423	6283.8	231	255	229	213	294	215	228	208	237	252	236.2
770	6552	6338	6290	6360	5918	6454	6420	6247	6039	6444	6306.2	233	256	230	213	294	216	229	209	237	252	236.9
771	6577	6373	6322	6385	5940	6482	6439	6270	6065	6474	6332.7	233	256	230	214	296	217	231	209	237	255	237.8
772	6594	6396	6355	6407	5964	6507	6467	6292	6093	6496	6357.1	234	258	232	214	296	217	232	209	238	257	238.7
773	6620	6415	6378	6425	5997	6528	6485	6309	6111	6524	6379.2	235	258	232	215	298	217	232	209	239	259	239.4
774	6648	6428	6401	6444	6012	6548	6518	6336	6133	6543	6401.1	236	261	233	215	299	217	233	210	240	259	240.3
775	6673	6452	6417	6467	6038	6566	6549	6364	6147	6566	6423.9	236	264	233	217	301	217	233	212	242	261	241.6
776	6705	6479	6440	6498	6053	6586	6573	6386	6165	6590	6447.5	237	265	234	219	302	218	235	212	242	262	242.6
777	6730	6504	6466	6508	6077	6609	6594	6397	6188	6616	6468.9	237	267	234	220	303	219	237	212	243	262	243.4
778	6750	6530	6491	6536	6111	6641	6617	6418	6211	6637	6494.2	237	270	235	220	304	219	237	212	244	263	244.1
779	6777	6550	6515	6551	6134	6670	6648	6443	6233	6663	6518.4	238	270	236	221	304	223	239	213	244	264	245.2
780	6801	6586	6539	6573	6159	6692	6665	6461	6262	6682	6542	238	273	237	222	305	224	239	213	245	266	246.2
781	6820	6614	6557	6602	6188	6712	6694	6479	6282	6704	6565.2	240	275	238	223	305	226	240	213	246	267	247.3
782	6836	6638	6583	6616	6206	6739	6717	6508	6295	6732	6587	240	277	239	226	306	227	241	214	248	268	248.6
783	6847	6659	6613	6641	6237	6757	6739	6523	6320	6757	6609.3	244	278	242	228	308	228	241	214	250	269	250.2
784	6872	6683	6649	6666	6256	6774	6757	6557	6336	6791	6634.1	245	279	242	229	309	230	241	214	251	269	250.9
785	6895	6696	6679	6694	6281	6804	6776	6589	6361	6816	6659.1	245	281	242	230	309	230	242	214	251	272	251.6
786	6918	6717	6705	6719	6309	6827	6803	6614	6385	6831	6682.8	245	282	245	230	310	230	244	216	251	272	252.5
787	6939	6742	6731	6742	6333	6850	6823	6632	6406	6861	6705.9	246	283	246	231	310	231	245	216	253	273	253.4
788	6969	6772	6755	6771	6357	6871	6844	6653	6424	6892	6730.8	248	283	246	233	312	232	246	216	254	274	254.4
789	6989	6798	6769	6797	6376	6898	6869	6684	6450	6915	6754.5	250	286	247	234	314	233	247	217	254	274	255.6
790	7017	6826	6791	6824	6405	6927	6895	6704	6471	6938	6779.8	250	288	247	235	317	235	248	220	255	275	257
791	7043	6849	6812	6856	6425	6953	6921	6735	6498	6964	6805.6	250	290	247	235	318	235	250	221	255	277	257.8
792	7071	6877	6843	6878	6452	6979	6947	6766	6513	6988	6831.4	250	291	247	236	319	235	251	221	256	278	258.4
793	7097	6904	6868	6904	6477	7005	6970	6791	6539	7025	6858	251	292	247	236	320	237	251	221	257	280	259.2
794	7123	6929	6889	6931	6497	7023	6996	6815	6564	7052	6881.9	251	293	250	237	320	238	251	221	259	280	260
795	7154	6954	6905	6959	6522	7050	7025	6839	6588	7068	6906.4	252	294	252	238	322	238	251	221	259	284	261.1
796	7186	6986	6937	6988	6555	7077	7055	6872	6623	7095	6937.4	252	295	254	239	322	238	251	222	261	284	261.8
797	7213	7013	6964	7011	6573	7108	7080	6907	6644	7122	6963.5	255	296	254	239	322	239	253	222	261	284	262.5
798	7239	7031	6991	7041	6598	7134	7101	6932	6663	7149	6987.9	256	296	255	241	325	241	253	222	261	286	263.6
799	7262	7057	7016	7058	6624	7159	7130	6953	6690	7178	7012.7	257	296	257	241	325	241	254	222	262	287	264.2
800	7284	7077	7055	7086	6649	7179	7163	6980	6719	7196	7038.8	257	298	257	242	327	244	255	222	263	287	265.2
801	7304	7107	7094	7115	6679	7208	7196	7011	6744	7222	7068	258	298	257	244	328	244	255	224	267	287	266.2
802	7328	7134	7126	7143	6704	7230	7232	7041	6764	7254	7095.6	260	300	257	244	331	245	256	225	267	288	267.3
803	7346	7157	7150	7172	6732	7249	7264	7071	6797	7276	7121.4	260	302	259	244	331	246	256	225	267	288	267.8
804	7379	7182	7176	7208	6763	7273	7285	7098	6830	7301	7149.5	260	302	259	246	333	249	256	226	267	290	268.8
805	7409	7203	7198	7236	6779	7302	7310	7125	6859	7334	7175.5	260	304	261	247	333	250	256	226	267	291	269.5
806	7427	7214	7224	7259	6807	7323	7337	7153	6886	7354	7198.4	260	305	264	248	334	250	258	226	267	291	270.3
807	7449	7246	7244	7282	6829	7351	7361	7182	6919	7383	7224.6	262	305	266	250	338	252	260	228	267	291	271.9
808	7471	7269	7270	7324	6855	7370	7389	7212	6942	7403	7250.5	263	305	267	251	338	253	261	229	267	291	272.5
809	7503	7297	7300	7354	6878	7391	7415	7244	6968	7435	7278.5	263	306	268	252	338	255	262	232	267	292	273.5
810	7535	7320	7330	7380	6904	7417	7437	7271	6992	7470	7305.6	263	306	271	253	340	255	262	234	270	292	274.6
811	7570	7350	7342	7403	6937	7445	7472	7297	7018	7494	7332.8	265	307	271	254	340	256	264	235	272	293	275.7
812	7604	7378	7370	7432	6962	7474	7499	7331	7051	7524	7362.5	266	309	271	256	343	257	264	235	273	294	276.8
813	7633	7403	7394	7453	7002	7504	7531	7360	7073	7550	7390.3	266	310	273	257	344	257	264	235	274	295	277.5
814	7664	7425	7423	7484	7031	7521	7560	7384	7101	7572	7416.5	266	312	275	259	344	257	264	236	276	296	278.5
815	7681	7449	7451	7516	7047	7548	7587	7416	7121	7609	7442.5	266	313	277	260	344	258	264	237	278	298	279.5
816	7703	7468	7480	7558	7065	7580	7616	7440	7150	7632	7469.2	266	313	279	261	345	260	264	238	279	299	280.4
817	7732	7501	7513	7579	7095	7608	7641	7467	7175	7660	7497.1	267	313	281	262	345	260	265	238	281	300	281.2
818	7757	7540	7546	7610	7128	7637	7673	7499	7201	7693	7528.4	268	315	282	262	347	261	266	240	281	300	282.2
819	7795	7571	7568	7640	7152	7672	7694	7519	7225	7717	7555.3	271	316	284	264	348	263	267	241	282	302	283.8
820	7824	7600	7588	7673	7179	7706	7731	7558	7244	7737	7584	272	316	286	264	348	263	267	241	286	304	284.7
821	7848	7628	7609	7704	7209	7739	7754	7581	7265	7765	7610.2	273	319	287	266	348	264	268	242	288	304	285.9
822	7884	7655	7639	7730	7237	7766	7775	7627	7295	7801	7640.9	273	321	288	267	349	265	270	243	288	305	286.9
823	7918	7687	7668	7764	7266	7787	7794	7647	7325	7828	7668.4	274	321	288	268	350	270	270	245	288	305	287.9
824	7950	7711	7690	7794	7297	7822	7824	7668	7352	7854	7696.2	275	321	289	269	351	271	271	246	290	306	288.9
825	7980	7738	7724	7816	7323	7851	7845	7695	7380	7883	7723.5	276	322	293	270	353	271	272	248	291	308	290.4
826	8009	7765	7751	7837	7343	7877	7870	7720	7404	7917	7749.3	278	325	294	270	353	272	274	250	292	308	291.6
827	8044	7793	7786	7864	7364	7900	7907	7749	7428	7937	7777.2	278	325	296	270	355	272	275	252	293	308	292.4
828	8080	7819	7822	7889	7388	7931	7935	7770	7457	7960	7805.1	278	325	296	270	357	272	275	255	293	309	293
829	8117	7853	7852	7913	7410	7961	7971	7805	7473	7985	7834	278	329	296	271	359	272	276	257	294	309	294.1
830	8140	7883	7882	7947	7437	7995	8021	7832	7492	8007	7863.6	279	329	298	272	360	272	277	258	294	309	294.8
831	8174	7916	7908	7973	7463	8022	8061	7852	7514	8042	7892.5	279	330	299	273	360	274	279	260	299	312	296.5
832	8209	7948	7933	8007	7484	8050	8087	7889	7546	8066	7921.9	280	331	300	273	361	278	280	262	301	315	298.1
833	8244	7980	7960	8045	7520	8080	8115	7927	7586	8093	7955	282	333	302	273	361	279	283	263	304	317	299.7
834	8285	8012	7979	8077	7545	8104	8151	7959	7614	8119	7984.5	283	335	302	273	361	279	284	263	308	319	300.7
835	8320	8039	8007	8118	7576	8136	8184	7988	7650	8152	8017	283	336	304	273	361	279	285	263	312	319	301.5
836	8346	8070	8040	8142	7608	8166	8224	8027	7672	8181	8047.6	283	337	305	273	363	279	287	263	313	322	302.5
837	8390	8098	8064	8168	7634	8188	8252	8053	7701	8221	8076.9	283	338	306	273	365	280	287	263	313	322	303
838	8427	8123	8091	8199	7654	8220	8288	8090	7731	8269	8109.2	283	338	307	274	368	281	287	264	314	323	303.9
839	8466	8151	8120	8222	7683	8257	8314	8126	7756	8284	8137.9	284	339	307	274	368	281	287	265	316	325	304.6
840	8493	8184	8142	8255	7708	8283	8340	8159	7775	8314	8165.3	287	339	307	274	369	281	291	265	318	326	305.7
841	8519	8207	8167	8284	7734	8317	8364	8185	7802	8344	8192.3	289	342	308	275	372	282	293	266	318	327	307.2
842	8552	8233	8205	8323	7770	8344	8392	8227	7830	8374	8225	289	342	308	277	375	284	295	268	319	327	308.4
843	8594	8266	8248	8351	7798	8384	8435	8263	7862	8398	8259.9	289	342	309	277	375	286	296	268	319	328	308.9
844	8624	8295	8283	8378	7829	8417	8466	8295	7878	8429	8289.4	292	345	310	277	376	288	297	268	320	328	310.1
845	8666	8326	8305	8406	7865	8446	8495	8340	7915	8471	8323.5	293	345	310	280	378	290	297	269	322	331	311.5
846	8696	8360	8346	8433	7900	8476	8523	8367	7949	8510	8356	293	345	311	283	378	292	298	270	323	332	312.5
847	8730	8393	8375	8480	7932	8510	8553	8387	7992	8533	8388.5	294	345	313	285	378	293	302	270	326	332	313.8
848	8771	8422	8403	8506	7957	8538	8585	8414	8023	8559	8417.8	296	348	314	285	379	294	304	272	327	333	315.2
849	8798	8446	8421	8541	7984	8567	8622	8457	8048	8595	8447.9	296	349	316	286	380	295	305	273	328	334	316.2
850	8831	8481	8444	8577	8014	8602	8649	8497	8081	8625	8480.1	296	349	321	287	382	298	306	274	328	334	317.5
851	8853	8511	8470	8621	8034	8633	8687	8536	8122	8654	8512.1	296	350	322	290	383	298	307	274	328	336	318.4
852	8888	8536	8487	8662	8058	8655	8709	8575	8154	8683	8540.7	299	352	323	290	383	299	308	275	328	336	319.3
853	8914	8575	8515	8695	8090	8686	8743	8606	8180	8711	8571.5	299	356	323	292	383	301	308	277	331	338	320.8
854	8937	8602	8544	8725	8117	8722	8777	8636	8208	8735	8600.3	303	357	324	294	384	303	309	278	334	339	322.5
855	8959	8626	8581	8749	8165	8746	8811	8677	8241	8768	8632.3	303	357	326	294	388	305	309	278	337	341	323.8
856	8995	8661	8617	8779	8195	8785	8847	8703	8271	8793	8664.6	307	361	327	295	390	305	310	278	338	342	325.3
857	9038	8696	8644	8818	8223	8815	8880	8738	8297	8822	8697.1	308	362	330	296	391	307	312	282	340	344	327.2
858	9064	8721	8683	8857	8262	8849	8906	8779	8339	8851	8731.1	309	362	330	296	391	307	312	283	340	346	327.6
859	9093	8751	8708	8884	8286	8880	8942	8813	8370	8884	8761.1	309	362	332	296	394	310	314	285	341	347	329
860	9134	8787	8738	8909	8314	8913	8981	8848	8401	8928	8795.3	309	363	332	296	395	311	315	286	342	347	329.6
861	9170	8819	8762	8942	8349	8941	9011	8881	8430	8956	8826.1	310	363	334	298	399	312	316	287	342	348	330.9
862	9209	8850	8793	8990	8383	8979	9046	8908	8458	8971	8858.7	311	364	334	298	403	314	318	288	342	349	332.1
863	9244	8883	8829	9022	8418	9014	9082	8932	8502	9003	8892.9	311	365	336	299	406	315	319	291	343	349	333.4
864	9281	8912	8867	9074	8449	9050	9107	8971	8535	9037	8928.3	311	368	339	300	407	318	320	293	344	351	335.1
865	9313	8949	8893	9100	8475	9082	9136	9007	8565	9074	8959.4	312	368	340	300	408	319	322	294	344	352	335.9
866	9353	8981	8926	9128	8502	9122	9170	9041	8601	9117	8994.1	314	368	341	300	408	320	323	294	350	353	337.1
867	9385	9022	8959	9153	8537	9152	9201	9076	8642	9151	9027.8	317	368	343	300	411	320	323	295	352	357	338.6
868	9414	9063	8993	9179	8573	9183	9237	9107	8670	9190	9060.9	318	369	344	301	412	320	324	296	359	359	340.2
869	9453	9092	9012	9211	8615	9215	9258	9138	8698	9225	9091.7	318	370	346	303	412	322	324	299	361	361	341.6
870	9489	9129	9039	9249	8658	9254	9295	9175	8741	9261	9129	318	370	347	304	413	324	327	300	362	361	342.6
871	9513	9174	9082	9291	8699	9290	9334	9202	8776	9297	9165.8	318	372	351	305	415	325	328	303	365	363	344.5
872	9551	9211	9115	9314	8730	9311	9368	9224	8815	9337	9197.6	319	374	352	307	416	326	328	303	366	364	345.5
873	9590	9230	9150	9345	8762	9350	9401	9260	8856	9373	9231.7	319	374	352	309	420	328	329	304	367	366	346.8
874	9619	9263	9183	9387	8801	9392	9436	9297	8899	9423	9270	320	375	353	311	422	328	330	305	367	367	347.8
875	9647	9304	9219	9419	8836	9446	9474	9332	8922	9457	9305.6	321	376	354	311	422	329	332	305	368	368	348.6
876	9682	9342	9249	9444	8862	9491	9508	9369	8956	9503	9340.6	321	377	354	311	425	329	333	306	370	370	349.6
877	9720	9380	9285	9480	8891	9523	9553	9409	8982	9527	9375	321	379	355	312	427	330	334	306	371	371	350.6
878	9763	9413	9330	9521	8919	9554	9592	9439	9010	9560	9410.1	324	380	355	314	428	332	335	308	372	371	351.9
879	9802	9431	9370	9568	8948	9587	9622	9466	9041	9599	9443.4	326	383	358	314	429	333	336	311	372	371	353.3
880	9843	9467	9413	9604	8982	9624	9665	9499	9087	9631	9481.5	327	387	359	314	432	334	341	312	372	371	354.9
881	9868	9498	9446	9660	9017	9655	9695	9530	9135	9669	9517.3	331	388	360	314	433	336	342	312	373	374	356.3
882	9914	9518	9472	9688	9050	9702	9728	9559	9169	9701	9550.1	333	392	362	315	435	336	344	313	375	377	358.2
883	9951	9559	9501	9722	9094	9741	9766	9597	9199	9737	9586.7	334	392	363	316	436	337	346	315	376	379	359.4
884	9995	9587	9536	9774	9119	9785	9808	9636	9228	9771	9623.9	337	396	367	317	437	338	348	317	378	379	361.4
885	10045	9619	9579	9803	9149	9822	9859	9667	9267	9806	9661.6	340	398	367	318	442	339	349	318	380	380	363.1
886	10080	9656	9618	9845	9183	9861	9892	9705	9310	9849	9699.9	341	399	367	318	444	341	354	319	381	381	364.5
887	10122	9698	9645	9884	9217	9901	9930	9727	9344	9883	9735.1	344	400	367	318	448	341	355	320	382	382	365.7
888	10167	9734	9677	9919	9246	9948	9975	9762	9373	9912	9771.3	345	403	368	318	451	347	358	321	382	384	367.7
889	10210	9774	9715	9957	9284	9978	10015	9798	9412	9951	9809.4	347	404	369	319	454	350	359	322	383	386	369.3
890	10256	9815	9744	9984	9323	10011	10046	9840	9451	10001	9847.1	348	405	370	321	456	353	360	323	385	386	370.7
891	10296	9849	9785	10024	9359	10041	10075	9886	9484	10042	9884.1	350	408	374	324	458	354	362	325	387	386	372.8
892	10343	9883	9827	10057	9396	10074	10110	9912	9510	10065	9917.7	351	412	375	325	459	355	363	327	390	390	374.7
893	10380	9926	9861	10092	9429	10103	10146	9949	9531	10097	9951.4	352	414	376	328	461	356	368	328	390	393	376.6
894	10421	9975	9894	10129	9467	10134	10189	9980	9565	10138	9989.2	353	417	378	329	462	357	369	329	391	395	378
895	10467	10009	9927	10160	9499	10184	10245	10003	9614	10171	10027.9	356	417	378	329	464	358	369	330	394	396	379.1
896	10505	10047	9975	10199	9519	10224	10267	10034	9645	10209	10062.4	357	418	378	330	466	358	370	333	396	398	380.4
897	10541	10089	10011	10235	9546	10263	10307	10070	9688	10246	10099.6	357	418	380	330	469	359	371	339	396	398	381.7
898	10578	10113	10040	10268	9593	10300	10348	10106	9728	10290	10136.4	358	420	382	330	471	359	372	342	396	399	382.9
899	10619	10162	10079	10312	9630	10340	10396	10136	9757	10333	10176.4	362	421	383	331	472	359	374	343	397	400	384.2
900	10654	10199	10115	10349	9662	10374	10430	10166	9785	10368	10210.2	364	422	385	331	477	360	374	344	399	402	385.8
901	10685	10230	10164	10388	9693	10414	10469	10200	9818	10410	10247.1	364	428	386	332	477	361	375	344	399	402	386.8
902	10718	10263	10198	10424	9720	10464	10509	10227	9856	10451	10283	364	429	387	332	479	363	376	346	401	406	388.3
903	10767	10303	10239	10466	9755	10504	10548	10265	9889	10488	10322.4	367	430	388	333	480	364	379	346	404	408	389.9
904	10814	10331	10277	10500	9789	10539	10579	10308	9934	10526	10359.7	368	430	388	336	480	366	381	347	404	408	390.8
905	10847	10367	10315	10534	9821	10580	10618	10349	9975	10566	10397.2	369	430	392	336	482	366	381	348	405	412	392.1
906	10880	10396	10359	10572	9859	10622	10662	10385	10027	10609	10437.1	373	431	392	336	482	366	382	351	405	414	393.2
907	10910	10429	10400	10605	9896	10658	10693	10414	10048	10650	10470.3	374	433	393	337	484	369	382	354	405	418	394.9
908	10952	10464	10441	10661	9924	10714	10733	10449	10094	10686	10511.8	375	434	394	338	485	373	383	355	408	419	396.4
909	10993	10498	10476	10712	9960	10758	10777	10491	10141	10724	10553	376	437	395	339	486	374	383	356	408	420	397.4
910	11050	10527	10517	10741	9990	10793	10810	10524	10172	10755	10587.9	377	437	396	340	492	377	383	356	411	422	399.1
911	11108	10575	10553	10781	10032	10839	10853	10571	10215	10800	10632.7	379	438	400	340	495	378	386	358	413	425	401.2
912	11150	10608	10594	10818	10065	10882	10891	10603	10251	10849	10671.1	380	439	400	343	496	379	389	358	413	427	402.4
913	11176	10660	10642	10855	10115	10922	10927	10634	10298	10894	10712.3	382	439	400	344	497	380	391	359	415	430	403.7
914	11201	10702	10678	10890	10161	10956	10974	10667	10332	10933	10749.4	382	443	402	346	498	380	392	359	418	430	405
915	11242	10749	10717	10938	10204	10988	11029	10710	10367	10989	10793.3	382	445	403	348	499	382	395	359	421	432	406.6
916	11290	10791	10763	10982	10239	11025	11068	10744	10397	11041	10834	383	445	405	351	502	383	396	359	422	436	408.2
917	11336	10826	10801	11026	10275	11060	11108	10793	10429	11077	10873.1	383	446	405	351	504	383	398	360	423	437	409
918	11378	10874	10833	11063	10315	11102	11157	10835	10460	11119	10913.6	384	448	407	353	508	384	400	362	425	438	410.9
919	11415	10917	10878	11104	10351	11153	11195	10876	10500	11164	10955.3	385	449	407	358	512	387	400	363	425	440	412.6
920	11444	10954	10917	11147	10393	11193	11222	10912	10528	11213	10992.3	388	453	409	359	516	387	401	364	425	442	414.4
921	11471	11011	10951	11186	10418	11248	11258	10947	10566	11255	11031.1	389	456	411	360	517	389	403	367	425	444	416.1
922	11515	11055	10992	11220	10468	11287	11296	10986	10613	11296	11072.8	391	458	411	363	519	390	404	369	427	447	417.9
923	11562	11093	11053	11258	10506	11324	11333	11025	10646	11335	11113.5	393	459	412	366	521	391	408	369	428	449	419.6
924	11601	11132	11101	11306	10542	11371	11371	11077	10684	11381	11156.6	394	462	412	368	521	392	411	370	428	452	421
925	11642	11176	11149	11335	10577	11409	11408	11121	10719	11408	11194.4	395	468	412	368	524	393	414	371	430	454	422.9
926	11684	11224	11189	11373	10616	11447	11443	11153	10750	11454	11233.3	397	469	413	369	530	397	416	373	431	455	425
927	11727	11274	11226	11404	10648	11482	11477	11192	10790	11501	11272.1	399	469	414	370	532	399	418	374	431	459	426.5
928	11781	11314	11261	11457	10678	11527	11532	11226	10820	11536	11313.2	402	471	415	372	534	402	419	377	433	461	428.6
929	11821	11351	11315	11500	10705	11564	11573	11268	10849	11590	11353.6	402	472	415	373	534	402	423	378	434	461	429.4
930	11876	11389	11361	11534	10752	11609	11614	11299	10875	11636	11394.5	406	472	415	375	536	402	425	380	436	468	431.5
931	11914	11443	11400	11575	10795	11648	11659	11348	10916	11688	11438.6	409	474	419	377	540	404	427	381	439	469	433.9
932	11950	11485	11443	11619	10833	11690	11691	11394	10947	11729	11478.1	413	475	421	379	543	404	428	382	440	470	435.5
933	12007	11532	11484	11662	10867	11730	11736	11432	10986	11785	11522.1	415	475	422	379	545	407	428	383	443	474	437.1
934	12041	11570	11520	11712	10902	11773	11788	11466	11022	11826	11562	417	479	424	379	547	408	429	386	446	474	438.9
935	12080	11602	11556	11753	10946	11826	11827	11526	11048	11871	11603.5	418	484	426	382	551	413	430	387	446	475	441.2
936	12116	11652	11591	11794	10986	11873	11869	11575	11084	11918	11645.8	422	485	428	385	552	415	432	390	446	477	443.2
937	12173	11702	11623	11843	11023	11920	11922	11617	11119	11962	11690.4	424	487	431	388	554	420	432	392	448	479	445.5
938	12210	11740	11674	11879	11059	11968	11970	11667	11155	12001	11732.3	427	491	435	390	555	420	433	393	452	479	447.5
939	12249	11790	11719	11923	11093	12023	12020	11711	11200	12038	11776.6	427	492	435	392	557	422	437	394	454	482	449.2
940	12303	11836	11764	11976	11136	12068	12054	11742	11241	12071	11819.1	427	494	436	395	557	423	438	395	454	485	450.4
941	12347	11884	11815	12021	11173	12127	12103	11772	11280	12131	11865.3	428	498	438	395	560	424	441	396	457	487	452.4
942	12380	11936	11851	12055	11230	12176	12139	11826	11324	12184	11910.1	429	500	439	397	562	425	441	396	458	489	453.6
943	12420	11974	11899	12110	11267	12226	12181	11873	11373	12212	11953.5	432	504	442	400	563	426	443	397	459	493	455.9
944	12462	12023	11936	12152	11307	12268	12229	11912	11411	12262	11996.2	432	508	445	404	564	426	443	397	461	495	457.5
945	12499	12062	11978	12194	11345	12309	12270	11966	11459	12314	12039.6	432	510	446	407	564	430	444	397	462	497	458.9
946	12553	12100	12026	12242	11392	12368	12311	12008	11502	12346	12084.8	432	511	448	410	567	431	446	402	463	499	460.9
947	12592	12146	12073	12277	11436	12403	12356	12045	11527	12400	12125.5	433	512	448	411	570	432	446	405	463	500	462
948	12640	12192	12127	12328	11464	12453	12401	12087	11577	12452	12172.1	437	514	448	412	572	433	447	405	466	503	463.7
949	12688	12232	12167	12381	11505	12509	12441	12124	11628	12501	12217.6	438	515	448	414	574	434	447	406	466	504	464.6
950	12737	12278	12202	12427	11554	12545	12500	12174	11683	12556	12265.6	440	516	449	415	577	437	448	406	467	505	466
951	12779	12322	12255	12477	11612	12589	12538	12217	11721	12610	12312	444	517	450	419	577	437	449	409	471	506	467.9
952	12821	12366	12318	12517	11656	12631	12586	12275	11760	12654	12358.4	445	518	452	419	578	439	451	410	474	507	469.3
953	12873	12415	12368	12561	11690	12678	12629	12320	11796	12698	12402.8	451	521	454	422	581	440	454	412	477	511	472.3
954	12912	12469	12409	12604	11736	12722	12676	12362	11839	12743	12447.2	451	525	457	422	583	440	454	412	479	514	473.7
955	12946	12509	12451	12642	11785	12765	12717	12411	11874	12788	12488.8	452	526	458	426	584	442	456	415	483	518	476
956	12995	12571	12493	12682	11831	12816	12759	12456	11923	12828	12535.4	453	527	459	426	588	442	457	417	484	519	477.2
957	13039	12610	12532	12726	11867	12860	12805	12503	11967	12882	12579.1	457	527	460	427	588	444	459	419	486	520	478.7
958	13076	12655	12574	12775	11905	12914	12843	12547	12015	12937	12624.1	457	532	462	429	589	446	459	420	487	520	480.1
959	13122	12698	12620	12817	11936	12958	12896	12593	12049	12981	12667	459	535	464	431	591	447	462	421	488	520	481.8
960	13161	12741	12666	12856	11983	13001	12929	12637	12093	13029	12709.6	462	539	465	433	594	449	465	421	488	520	483.6
961	13210	12785	12715	12910	12029	13031	12971	12676	12137	13073	12753.7	466	544	468	434	594	450	466	421	489	523	485.5
962	13254	12827	12764	12954	12082	13084	13024	12725	12185	13117	12801.6	467	546	470	435	597	451	467	423	491	523	487
963	13292	12881	12806	12997	12117	13133	13067	12780	12232	13162	12846.7	468	550	474	435	603	453	470	424	493	524	489.4
964	13335	12925	12851	13049	12172	13183	13115	12837	12272	13207	12894.6	470	551	475	435	610	454	470	427	496	528	491.6
965	13375	12987	12910	13103	12214	13231	13159	12889	12333	13258	12945.9	476	554	476	438	611	455	470	427	498	530	493.5
966	13410	13040	12942	13160	12268	13279	13208	12938	12371	13308	12992.4	480	559	481	439	614	458	471	429	499	531	496.1
967	13471	13082	12992	13203	12313	13321	13259	12986	12419	13353	13039.9	481	561	485	441	616	461	472	431	502	534	498.4
968	13520	13134	13037	13259	12364	13368	13310	13040	12464	13406	13090.2	482	562	488	442	620	464	472	432	504	535	500.1
969	13561	13178	13086	13302	12410	13415	13365	13089	12522	13453	13138.1	485	564	489	447	624	465	473	432	506	536	502.1
970	13596	13230	13131	13357	12449	13462	13424	13128	12572	13494	13184.3	486	568	490	449	625	467	475	433	508	537	503.8
971	13650	13275	13176	13404	12481	13500	13473	13179	12617	13543	13229.8	489	571	492	451	630	470	477	436	508	540	506.4
972	13701	13328	13225	13456	12525	13539	13527	13231	12660	13581	13277.3	490	572	496	455	630	473	480	436	510	542	508.4
973	13750	13378	13294	13520	12562	13583	13570	13280	12711	13619	13326.7	490	576	501	456	632	477	482	438	513	545	511
974	13795	13443	13341	13566	12600	13629	13619	13323	12761	13672	13374.9	491	578	502	457	634	477	483	441	515	548	512.6
975	13844	13492	13390	13622	12648	13681	13666	13378	12807	13734	13426.2	493	582	505	463	636	478	484	447	518	548	515.4
976	13892	13546	13443	13676	12704	13730	13725	13429	12849	13798	13479.2	496	582	508	468	638	478	484	449	520	552	517.5
977	13953	13598	13480	13721	12762	13777	13763	13469	12902	13838	13526.3	498	582	512	469	640	480	485	451	522	555	519.4
978	14009	13647	13530	13774	12823	13829	13807	13529	12961	13888	13579.7	499	585	514	474	644	482	486	455	528	560	522.7
979	14058	13696	13581	13824	12886	13876	13853	13574	13017	13933	13629.8	499	586	515	475	648	484	488	455	530	562	524.2
980	14100	13734	13644	13876	12932	13922	13911	13622	13070	13976	13678.7	501	587	516	475	654	485	490	457	530	563	525.8
981	14153	13775	13692	13930	12975	13985	13961	13676	13111	14040	13729.8	504	587	516	478	654	485	493	459	532	564	527.2
982	14203	13832	13740	13972	13028	14047	13993	13736	13141	14097	13778.9	505	588	518	479	656	486	494	461	535	566	528.8
983	14266	13888	13798	14016	13070	14100	14043	13803	13194	14138	13831.6	507	590	519	481	656	487	495	462	538	566	530.1
984	14313	13931	13836	14065	13124	14145	14100	13860	13237	14188	13879.9	509	592	521	485	658	488	497	463	538	567	531.8
985	14368	13975	13904	14111	13172	14179	14160	13927	13286	14241	13932.3	511	593	521	485	660	491	498	466	539	568	533.2
986	14424	14017	13954	14170	13222	14237	14209	13990	13333	14292	13984.8	512	596	522	486	661	494	500	466	541	569	534.7
987	14475	14071	14004	14214	13275	14289	14264	14027	13372	14340	14033.1	513	602	522	488	661	499	501	468	545	571	537
988	14525	14132	14062	14270	13321	14337	14306	14095	13412	14396	14085.6	513	602	525	491	663	500	503	470	550	572	538.9
989	14571	14169	14113	14329	13361	14385	14364	14144	13460	14462	14135.8	516	606	526	492	664	500	504	471	550	573	540.2
990	14629	14224	14168	14380	13408	14433	14411	14198	13499	14521	14187.1	518	612	528	496	666	501	507	472	553	574	542.7
991	14682	14285	14218	14445	13457	14472	14471	14248	13551	14567	14239.6	520	613	530	497	666	505	508	472	558	577	544.6
992	14724	14346	14279	14496	13518	14525	14511	14296	13600	14626	14292.1	520	614	535	499	666	507	508	474	559	580	546.2
993	14791	14407	14334	14547	13565	14590	14573	14349	13649	14690	14349.5	523	617	536	499	668	508	510	474	560	583	547.8
994	14850	14452	14372	14620	13616	14648	14635	14397	13696	14733	14401.9	526	617	541	503	671	515	512	476	562	586	550.9
995	14910	14495	14427	14664	13664	14699	14682	14437	13749	14791	14451.8	527	619	542	504	672	518	513	478	567	588	552.8
996	14965	14541	14471	14722	13708	14758	14748	14502	13801	14862	14507.8	530	621	545	506	676	522	515	478	569	588	555
997	15039	14592	14528	14784	13759	14808	14797	14557	13849	14926	14563.9	531	622	547	508	678	524	518	482	572	589	557.1
998	15095	14642	14577	14832	13821	14861	14842	14615	13901	14988	14617.4	531	623	552	512	682	525	520	483	573	591	559.2
999	15149	14709	14617	14877	13872	14913	14906	14672	13956	15028	14669.9	531	628	554	513	684	526	522	486	575	592	561.1
1000	15219	14759	14676	14938	13922	14959	14978	14732	14006	15076	14726.5	533	629	557	514	686	531	525	488	577	593	563.3
1001	15265	14810	14730	14991	13978	15006	15032	14795	14058	15130	14779.5	533	631	558	516	686	533	528	491	580	594	565
1002	15311	14874	14784	15054	14037	15059	15094	14863	14110	15177	14836.3	534	635	558	517	688	534	531	492	582	596	566.7
1003	15368	14919	14832	15106	14085	15107	15157	14919	14155	15229	14887.7	536	636	562	518	693	536	532	494	582	598	568.7
1004	15423	14978	14877	15160	14127	15166	15209	14972	14210	15293	14941.5	537	640	566	520	694	537	533	498	582	598	570.5
1005	15484	15025	14931	15218	14173	15218	15260	15029	14271	15362	14997.1	539	642	571	522	696	541	534	502	584	603	573.4
1006	15535	15084	14978	15274	14232	15290	15317	15081	14324	15413	15052.8	539	642	575	524	698	541	535	503	586	605	574.8
1007	15597	15146	15025	15321	14290	15345	15385	15134	14398	15466	15110.7	540	646	576	526	700	542	535	506	586	606	576.3
1008	15644	15202	15071	15391	14336	15399	15441	15193	14455	15540	15167.2	540	648	580	528	701	543	539	509	588	610	578.6
1009	15704	15256	15140	15456	14388	15454	15485	15251	14516	15608	15225.8	545	650	582	528	702	547	544	510	590	612	581
1010	15757	15315	15198	15521	14433	15505	15544	15316	14572	15668	15282.9	547	654	584	530	708	549	544	511	590	613	583
1011	15810	15374	15254	15583	14481	15553	15607	15372	14627	15723	15338.4	548	655	587	531	712	553	545	513	596	613	585.3
1012	15860	15435	15306	15644	14543	15602	15672	15425	14679	15777	15394.3	552	658	589	532	717	557	547	517	598	616	588.3
1013	15930	15496	15359	15700	14594	15666	15725	15481	14734	15827	15451.2	554	659	592	533	720	558	551	517	599	620	590.3
1014	15997	15546	15421	15751	14656	15722	15775	15532	14774	15877	15505.1	557	661	592	534	723	560	551	518	602	625	592.3
1015	16084	15614	15492	15802	14709	15790	15847	15601	14822	15923	15568.4	558	665	595	535	724	563	558	519	606	627	595
1016	16152	15670	15549	15848	14776	15861	15902	15660	14880	15984	15628.2	559	665	597	537	728	564	562	519	610	633	597.4
1017	16215	15725	15603	15911	14834	15916	15952	15706	14943	16031	15683.6	561	668	600	538	732	566	564	520	613	633	599.5
1018	16278	15779	15666	15955	14881	15964	16025	15762	15000	16090	15740	563	670	602	541	735	566	566	521	615	633	601.2
1019	16332	15841	15717	16009	14930	16012	16093	15838	15059	16142	15797.3	564	672	605	541	741	569	571	523	618	635	603.9
1020	16391	15897	15763	16069	14973	16086	16155	15911	15105	16199	15854.9	564	673	607	542	744	569	572	526	623	640	606
1021	16447	15963	15825	16140	15046	16132	16210	15963	15162	16248	15913.6	566	676	609	545	744	571	577	526	625	642	608.1
1022	16517	16007	15889	16224	15093	16189	16270	16018	15207	16321	15973.5	569	677	611	545	747	571	581	527	626	643	609.7
1023	16570	16056	15946	16286	15145	16250	16327	16081	15255	16375	16029.1	574	682	613	547	748	571	583	527	629	644	611.8
1024	16653	16121	16012	16354	15212	16313	16385	16158	15311	16443	16096.2	575	684	618	547	751	572	583	528	631	646	613.5
1025	16716	16172	16078	16414	15261	16376	16455	16235	15368	16497	16157.2	577	687	620	548	752	572	586	530	635	649	615.6
1026	16783	16228	16141	16482	15308	16436	16511	16285	15422	16558	16215.4	580	692	622	549	754	575	590	531	638	650	618.1
1027	16832	16262	16201	16532	15361	16491	16562	16348	15499	16601	16268.9	580	696	626	552	755	577	595	532	643	653	620.9
1028	16900	16330	16252	16605	15411	16557	16610	16397	15558	16664	16328.4	581	698	631	554	759	578	597	536	644	657	623.5
1029	16986	16379	16314	16670	15470	16609	16684	16463	15615	16735	16392.5	584	700	632	555	762	581	598	540	649	662	626.3
1030	17045	16450	16368	16727	15541	16679	16755	16522	15690	16801	16457.8	585	702	632	557	767	582	600	543	649	666	628.3
1031	17119	16511	16418	16786	15604	16737	16816	16572	15746	16858	16516.7	587	705	632	560	769	584	604	545	651	674	631.1
1032	17189	16572	16473	16843	15669	16788	16873	16645	15799	16920	16577.1	588	707	635	561	772	587	606	546	654	677	633.3
1033	17269	16628	16534	16907	15736	16850	16935	16707	15858	16967	16639.1	592	709	636	561	776	589	608	546	658	678	635.3
1034	17325	16686	16580	16967	15792	16908	17013	16776	15937	17034	16701.8	595	709	638	563	777	591	611	547	661	679	637.1
1035	17377	16737	16635	17021	15859	16984	17072	16842	16001	17094	16762.2	596	714	639	565	779	595	613	548	664	683	639.6
1036	17429	16800	16692	17085	15930	17046	17139	16912	16063	17146	16824.2	600	716	642	567	781	599	616	550	667	686	642.4
1037	17514	16848	16745	17133	15997	17122	17196	16961	16124	17211	16885.1	600	716	645	569	781	601	617	555	669	693	644.6
1038	17573	16918	16829	17178	16069	17173	17267	17032	16182	17269	16949	603	721	646	570	785	604	620	561	673	698	648.1
1039	17651	16964	16893	17250	16132	17218	17330	17084	16226	17330	17007.8	608	723	647	573	790	604	620	565	675	698	650.3
1040	17716	17049	16959	17308	16195	17287	17377	17137	16280	17401	17070.9	608	724	649	578	793	608	621	568	679	702	653
1041	17788	17115	17017	17371	16241	17344	17436	17188	16343	17469	17131.2	610	724	651	584	797	609	625	570	681	705	655.6
1042	17858	17189	17074	17434	16298	17420	17491	17242	16415	17532	17195.3	611	727	656	585	798	613	627	572	684	708	658.1
1043	17907	17248	17137	17506	16355	17489	17554	17313	16485	17597	17259.1	612	728	657	585	802	613	633	574	686	712	660.2
1044	17971	17308	17199	17576	16411	17563	17641	17389	16538	17652	17324.8	613	732	660	586	808	616	641	575	687	713	663.1
1045	18041	17372	17267	17631	16466	17628	17707	17447	16592	17719	17387	614	732	661	590	811	618	643	577	688	716	665
1046	18107	17432	17327	17694	16524	17677	17776	17505	16652	17775	17446.9	618	734	664	593	813	620	646	580	690	720	667.8
1047	18177	17485	17384	17766	16578	17746	17859	17563	16725	17833	17511.6	621	735	668	593	814	621	646	582	692	720	669.2
1048	18235	17557	17447	17827	16634	17820	17925	17635	16777	17900	17575.7	623	739	673	595	818	623	648	587	695	722	672.3
1049	18313	17612	17519	17883	16693	17887	17992	17683	16837	17967	17638.6	627	742	675	596	820	624	651	590	699	724	674.8
1050	18381	17666	17587	17955	16759	17964	18060	17744	16922	18055	17709.3	629	745	676	596	823	626	654	595	699	726	676.9
1051	18444	17743	17650	18029	16809	18034	18131	17816	16983	18127	17776.6	633	745	678	602	826	631	656	596	700	726	679.3
1052	18522	17807	17716	18086	16876	18100	18190	17865	17041	18190	17839.3	638	750	678	605	828	634	659	597	704	728	682.1
1053	18587	17867	17789	18158	16928	18164	18253	17933	17119	18247	17904.5	638	754	679	609	830	637	662	600	706	730	684.5
1054	18666	17940	17849	18225	16988	18228	18321	17998	17191	18315	17972.1	639	757	684	611	839	642	663	602	712	733	688.2
1055	18733	18018	17923	18293	17049	18307	18380	18064	17261	18386	18041.4	640	761	688	612	840	643	666	605	717	733	690.5
1056	18800	18079	17983	18366	17102	18385	18441	18131	17332	18457	18107.6	641	766	693	614	847	644	669	605	718	735	693.2
1057	18861	18145	18046	18435	17150	18449	18519	18186	17409	18540	18174	644	769	693	616	852	647	676	606	719	739	696.1
1058	18940	18206	18104	18509	17205	18525	18575	18260	17485	18611	18242	644	771	696	618	855	647	678	610	723	743	698.5
1059	19014	18282	18170	18580	17272	18591	18633	18324	17544	18679	18308.9	647	776	700	618	858	649	681	612	723	745	700.9
1060	19094	18367	18234	18655	17346	18646	18715	18380	17611	18757	18380.5	652	779	702	620	860	650	682	617	724	746	703.2
1061	19190	18436	18296	18737	17409	18729	18795	18441	17689	18830	18455.2	654	783	705	621	865	652	684	620	726	748	705.8
1062	19268	18495	18348	18815	17478	18791	18872	18518	17748	18896	18522.9	655	790	709	623	870	658	685	621	730	756	709.7
1063	19342	18585	18428	18882	17537	18863	18929	18571	17805	18958	18590	660	794	711	626	873	662	687	623	734	760	713
1064	19409	18656	18482	18937	17607	18934	18996	18639	17864	19016	18654	662	796	716	628	877	663	689	625	735	763	715.4
1065	19492	18709	18546	18997	17670	19004	19066	18697	17938	19083	18720.2	663	800	718	629	882	665	689	625	737	768	717.6
1066	19574	18789	18631	19092	17728	19087	19147	18774	18015	19166	18800.3	665	804	719	633	884	671	693	628	741	769	720.7
1067	19645	18858	18711	19151	17782	19167	19236	18837	18067	19227	18868.1	666	805	721	638	891	673	696	629	745	773	723.7
1068	19717	18943	18788	19223	17842	19247	19312	18912	18119	19295	18939.8	669	807	725	640	896	676	704	629	748	777	727.1
1069	19801	19015	18872	19294	17913	19304	19393	18977	18191	19354	19011.4	671	810	727	642	905	679	708	629	752	779	730.2
1070	19855	19095	18953	19353	17974	19377	19472	19050	18260	19426	19081.5	674	813	729	644	910	681	709	630	754	780	732.4
1071	19945	19170	19016	19426	18041	19470	19552	19133	18346	19491	19159	678	821	730	646	912	684	711	632	758	783	735.5
1072	20013	19240	19093	19482	18126	19552	19613	19193	18410	19562	19228.4	680	823	732	647	915	688	714	638	761	785	738.3
1073	20096	19320	19157	19551	18198	19619	19689	19261	18472	19639	19300.2	681	826	734	649	917	694	720	642	764	787	741.4
1074	20175	19391	19239	19628	18265	19697	19755	19321	18531	19717	19371.9	689	831	736	653	919	698	725	644	766	794	745.5
1075	20236	19445	19301	19711	18333	19775	19846	19386	18597	19790	19442	691	833	739	657	921	701	727	647	770	797	748.3
1076	20302	19524	19371	19765	18394	19855	19917	19452	18654	19872	19510.6	693	836	741	661	925	706	729	651	772	804	751.8
1077	20358	19619	19454	19843	18458	19923	19996	19522	18722	19949	19584.4	694	840	745	662	932	707	734	653	777	806	755
1078	20459	19681	19543	19923	18514	19996	20063	19578	18794	20018	19656.9	696	843	746	662	933	710	735	654	782	810	757.1
1079	20526	19757	19607	19996	18571	20073	20147	19642	18869	20095	19728.3	699	846	749	663	936	713	735	659	783	815	759.8
1080	20620	19831	19680	20069	18644	20147	20211	19721	18950	20186	19805.9	704	848	753	668	939	716	742	660	785	816	763.1
1081	20684	19892	19749	20162	18688	20212	20288	19789	19029	20253	19874.6	708	854	755	673	939	718	745	665	786	820	766.3
1082	20758	19966	19826	20256	18755	20281	20362	19872	19078	20325	19947.9	710	857	758	673	940	722	749	670	787	824	769
1083	20829	20046	19901	20329	18835	20374	20444	19942	19138	20398	20023.6	712	863	762	673	942	723	751	671	789	827	771.3
1084	20903	20112	19996	20403	18897	20434	20518	20023	19209	20482	20097.7	717	864	764	675	947	724	752	677	790	832	774.2
1085	21002	20184	20060	20489	18976	20500	20582	20107	19263	20556	20171.9	719	867	768	677	951	727	756	680	793	837	777.5
1086	21076	20244	20146	20561	19044	20570	20664	20161	19334	20625	20242.5	719	869	772	681	955	729	757	681	796	840	779.9
1087	21162	20338	20219	20621	19106	20665	20742	20225	19390	20690	20315.8	723	871	776	683	958	731	758	682	797	844	782.3
1088	21230	20409	20310	20715	19187	20751	20827	20292	19458	20791	20397	724	874	778	684	959	735	762	683	800	846	784.5
1089	21326	20469	20382	20804	19264	20833	20910	20370	19539	20866	20476.3	726	875	779	690	963	739	764	689	807	850	788.2
1090	21402	20559	20454	20876	19332	20920	20965	20437	19612	20931	20548.8	729	876	780	692	970	741	767	692	812	850	790.9
1091	21487	20639	20540	20971	19399	20987	21039	20501	19682	21008	20625.3	734	879	783	692	976	746	768	694	816	853	794.1
1092	21572	20712	20612	21040	19465	21062	21113	20570	19771	21064	20698.1	736	881	786	693	978	749	769	694	820	855	796.1
1093	21659	20775	20672	21119	19544	21134	21180	20655	19848	21140	20772.6	739	885	788	696	985	751	772	694	824	859	799.3
1094	21738	20854	20735	21192	19615	21200	21258	20729	19909	21228	20845.8	745	887	789	700	994	753	778	696	826	863	803.1
1095	21823	20919	20808	21258	19688	21276	21332	20796	19979	21312	20919.1	750	892	793	701	994	758	783	698	827	867	806.3
1096	21882	21001	20883	21333	19761	21346	21415	20867	20046	21404	20993.8	752	893	797	704	998	763	783	703	832	868	809.3
1097	21969	21073	20964	21401	19840	21435	21483	20951	20100	21470	21068.6	755	895	804	708	1002	766	787	705	842	873	813.7
1098	22056	21151	21051	21490	19914	21517	21548	21024	20174	21560	21148.5	760	900	808	710	1009	771	792	705	844	875	817.4
1099	22127	21224	21139	21577	19978	21606	21616	21112	20243	21654	21227.6	763	905	810	713	1010	775	795	708	845	883	820.7
1100	22207	21308	21220	21662	20059	21689	21704	21193	20328	21732	21310.2	765	908	810	717	1014	776	800	710	850	891	824.1
1101	22292	21372	21289	21735	20142	21769	21770	21269	20393	21815	21384.6	770	917	814	722	1016	779	800	711	852	897	827.8
1102	22367	21449	21352	21806	20221	21850	21850	21353	20465	21887	21460	772	920	816	725	1019	781	807	714	856	904	831.4
1103	22447	21531	21434	21894	20288	21932	21926	21432	20548	21955	21538.7	779	927	823	728	1026	786	807	716	858	909	835.9
1104	22529	21614	21536	21966	20379	22004	22022	21523	20633	22040	21624.6	779	932	823	733	1034	787	812	717	859	913	838.9
1105	22619	21699	21619	22040	20457	22086	22111	21618	20715	22118	21708.2	781	935	828	738	1036	790	817	722	862	917	842.6
1106	22695	21782	21698	22123	20519	22169	22177	21696	20783	22204	21784.6	784	941	830	740	1040	792	820	724	866	921	845.8
1107	22767	21851	21773	22220	20588	22250	22270	21777	20842	22291	21862.9	788	943	833	742	1044	795	824	728	868	923	848.8
1108	22845	21933	21851	22289	20666	22345	22348	21851	20921	22383	21943.2	793	948	836	743	1047	802	827	731	870	925	852.2
1109	22909	22033	21924	22361	20730	22442	22440	21949	20993	22484	22026.5	800	952	837	745	1050	805	829	734	874	927	855.3
1110	22993	22122	21993	22443	20813	22525	22497	22028	21063	22570	22104.7	806	955	840	748	1052	806	832	737	875	929	858
1111	23077	22197	22079	22531	20890	22623	22568	22111	21133	22657	22186.6	809	957	842	752	1054	811	836	739	878	933	861.1
1112	23157	22274	22171	22625	20959	22712	22638	22186	21212	22738	22267.2	814	960	845	755	1058	812	840	742	879	940	864.5
1113	23245	22353	22253	22716	21042	22791	22747	22260	21295	22813	22351.5	816	965	847	757	1061	815	843	743	882	943	867.2
1114	23335	22423	22325	22796	21111	22865	22834	22348	21372	22900	22430.9	819	969	851	759	1065	818	845	746	884	945	870.1
1115	23414	22499	22406	22890	21177	22942	22909	22423	21473	22998	22513.1	822	973	855	766	1071	822	851	747	885	949	874.1
1116	23501	22578	22480	22969	21253	23022	22987	22510	21559	23103	22596.2	826	974	857	768	1075	823	853	750	890	955	877.1
1117	23587	22642	22573	23064	21334	23105	23067	22598	21638	23174	22678.2	828	975	860	772	1076	828	857	750	892	956	879.4
1118	23659	22725	22648	23150	21402	23186	23167	22693	21720	23279	22762.9	828	979	863	773	1082	832	861	752	894	959	882.3
1119	23743	22810	22741	23247	21488	23260	23268	22764	21806	23369	22849.6	830	984	865	773	1089	835	863	754	902	964	885.9
1120	23820	22886	22824	23334	21562	23362	23372	22862	21891	23456	22936.9	834	987	868	779	1095	835	865	756	906	966	889.1
1121	23909	22987	22896	23433	21647	23456	23451	22939	21976	23559	23025.3	837	987	871	781	1095	839	867	759	909	967	891.2
1122	23978	23080	22978	23519	21724	23550	23538	23035	22052	23641	23109.5	841	989	874	786	1098	844	867	764	912	970	894.5
1123	24079	23168	23065	23599	21804	23637	23628	23139	22128	23715	23196.2	845	992	875	788	1102	846	872	767	917	972	897.6
1124	24164	23263	23136	23665	21890	23711	23706	23229	22202	23812	23277.8	846	993	877	792	1107	849	875	776	920	976	901.1
1125	24263	23348	23214	23754	21978	23793	23776	23330	22292	23895	23364.3	851	996	880	797	1111	854	878	779	922	981	904.9
1126	24362	23433	23293	23833	22059	23888	23862	23431	22385	23997	23454.3	857	1001	884	799	1115	855	879	785	926	987	908.8
1127	24431	23530	23398	23921	22160	23986	23946	23514	22467	24089	23544.2	858	1005	885	805	1118	855	882	789	930	988	911.5
1128	24536	23604	23489	24009	22253	24075	24024	23601	22571	24175	23633.7	860	1012	891	809	1125	860	885	793	932	991	915.8
1129	24647	23705	23569	24117	22345	24159	24124	23692	22638	24274	23727	865	1015	893	817	1128	864	887	799	936	993	919.7
1130	24739	23785	23656	24192	22449	24231	24216	23788	22723	24354	23813.3	867	1020	896	819	1134	869	889	805	937	995	923.1
1131	24834	23877	23725	24276	22521	24313	24286	23874	22813	24451	23897	872	1025	899	822	1140	872	892	809	942	996	926.9
1132	24920	23973	23814	24358	22614	24422	24369	23968	22906	24536	23988	874	1030	904	828	1144	875	894	810	946	1001	930.6
1133	25015	24053	23890	24459	22719	24527	24476	24069	22991	24634	24083.3	876	1032	908	833	1151	876	900	811	948	1007	934.2
1134	25095	24140	23991	24551	22803	24631	24576	24154	23057	24716	24171.4	879	1035	911	839	1153	878	900	812	950	1012	936.9
1135	25175	24241	24103	24642	22893	24720	24670	24233	23130	24811	24261.8	882	1042	913	845	1155	881	902	815	956	1017	940.8
1136	25263	24331	24196	24744	22979	24810	24751	24304	23217	24912	24350.7	884	1048	919	845	1161	887	904	818	959	1022	944.7
1137	25347	24431	24296	24810	23059	24906	24824	24392	23282	25002	24434.9	889	1052	922	847	1167	888	906	822	961	1027	948.1
1138	25418	24535	24395	24900	23138	24993	24920	24486	23370	25121	24527.6	892	1059	924	851	1170	890	908	826	962	1029	951.1
1139	25520	24629	24483	24997	23239	25093	25012	24582	23450	25217	24622.2	895	1061	927	854	1176	896	911	828	965	1035	954.8
1140	25593	24729	24564	25100	23335	25174	25114	24675	23531	25315	24713	895	1064	932	857	1180	897	913	832	967	1042	957.9
1141	25678	24808	24650	25198	23391	25266	25215	24791	23623	25395	24801.5	898	1072	936	860	1183	899	918	838	968	1048	962
1142	25771	24890	24752	25293	23487	25354	25303	24888	23718	25496	24895.2	900	1079	937	863	1185	908	925	842	970	1051	966
1143	25885	24970	24834	25371	23573	25454	25377	24985	23799	25630	24987.8	905	1084	940	866	1190	912	928	848	972	1054	969.9
1144	25980	25052	24914	25483	23675	25544	25469	25082	23890	25721	25081	911	1088	944	868	1193	919	931	853	975	1058	974
1145	26062	25136	25011	25588	23764	25644	25552	25180	23992	25797	25172.6	914	1096	945	872	1194	919	938	855	980	1063	977.6
1146	26153	25216	25101	25683	23842	25746	25645	25275	24088	25895	25264.4	916	1104	949	879	1197	920	943	859	985	1066	981.8
1147	26256	25301	25198	25770	23937	25818	25746	25375	24167	25979	25354.7	921	1107	950	882	1200	926	945	860	992	1072	985.5
1148	26343	25422	25290	25869	24039	25909	25835	25481	24247	26054	25448.9	925	1110	955	888	1203	929	952	863	998	1077	990
1149	26445	25515	25369	25953	24129	25983	25913	25598	24351	26160	25541.6	928	1113	957	890	1206	932	953	870	1001	1080	993
1150	26545	25604	25448	26063	24222	26071	26019	25670	24445	26248	25633.5	930	1117	961	897	1210	937	954	873	1010	1083	997.2
1151	26641	25703	25555	26167	24304	26154	26137	25752	24540	26344	25729.7	933	1120	964	908	1214	938	957	877	1017	1086	1001.4
1152	26742	25792	25648	26261	24393	26258	26249	25843	24641	26438	25826.5	936	1124	973	911	1214	942	962	878	1021	1088	1004.9
1153	26836	25900	25746	26360	24492	26371	26335	25945	24725	26560	25927	939	1127	977	915	1226	948	965	883	1027	1089	1009.6
1154	26946	26001	25858	26460	24578	26456	26420	26033	24830	26667	26024.9	943	1127	982	916	1231	952	965	886	1031	1090	1012.3
1155	27055	26098	25951	26562	24649	26560	26522	26131	24924	26757	26120.9	950	1134	988	919	1237	955	968	889	1033	1093	1016.6
1156	27161	26219	26051	26670	24732	26668	26620	26218	25002	26856	26219.7	955	1135	993	923	1243	957	971	889	1037	1097	1020
1157	27260	26304	26143	26770	24815	26763	26726	26318	25092	26957	26314.8	959	1140	999	925	1249	958	974	893	1045	1100	1024.2
1158	27369	26407	26225	26878	24912	26857	26837	26408	25170	27041	26410.4	966	1148	1003	930	1254	959	977	896	1053	1101	1028.7
1159	27447	26497	26330	26968	24993	26961	26934	26493	25273	27156	26505.2	972	1151	1007	933	1261	963	979	901	1062	1103	1033.2
1160	27556	26604	26426	27057	25096	27056	27035	26573	25351	27257	26601.1	975	1154	1012	937	1265	967	982	904	1063	1105	1036.4
1161	27664	26696	26520	27157	25203	27182	27125	26671	25451	27369	26703.8	980	1160	1019	938	1269	969	984	907	1070	1107	1040.3
1162	27745	26797	26614	27258	25286	27289	27234	26796	25549	27467	26803.5	984	1164	1022	944	1273	973	985	909	1075	1112	1044.1
1163	27863	26903	26702	27356	25375	27379	27331	26916	25641	27563	26902.9	989	1166	1025	951	1276	977	987	911	1077	1115	1047.4
1164	27987	27012	26804	27462	25464	27479	27444	27016	25735	27669	27007.2	991	1170	1028	951	1280	984	989	912	1078	1119	1050.2
1165	28091	27113	26908	27591	25554	27584	27531	27114	25823	27762	27107.1	994	1170	1036	956	1283	986	990	913	1084	1126	1053.8
1166	28194	27209	27014	27706	25661	27676	27623	27218	25929	27871	27210.1	998	1175	1039	958	1289	992	993	918	1087	1127	1057.6
1167	28288	27308	27107	27793	25757	27761	27736	27324	26013	27985	27307.2	998	1179	1042	964	1294	999	997	923	1089	1131	1061.6
1168	28389	27409	27206	27890	25845	27873	27839	27442	26101	28092	27408.6	1002	1181	1047	966	1297	1002	999	925	1093	1135	1064.7
1169	28508	27512	27305	27991	25949	27974	27945	27553	26212	28180	27512.9	1006	1187	1049	967	1304	1007	1002	926	1102	1141	1069.1
1170	28610	27610	27406	28094	26045	28078	28060	27657	26300	28280	27614	1008	1192	1055	970	1309	1009	1009	929	1106	1146	1073.3
1171	28714	27718	27508	28205	26134	28191	28153	27757	26398	28383	27716.1	1011	1197	1061	972	1311	1011	1011	931	1110	1150	1076.5
1172	28820	27829	27613	28302	26217	28290	28266	27862	26498	28502	27819.9	1016	1202	1064	974	1315	1015	1017	935	1117	1154	1080.9
1173	28912	27920	27703	28394	26293	28396	28366	27974	26607	28613	27917.8	1018	1212	1072	979	1321	1020	1021	940	1122	1156	1086.1
1174	29036	28027	27830	28493	26405	28510	28482	28071	26727	28736	28031.7	1019	1216	1076	983	1329	1025	1025	950	1126	1160	1090.9
1175	29152	28118	27950	28599	26516	28619	28575	28189	26818	28834	28137	1022	1219	1083	986	1332	1027	1028	955	1129	1166	1094.7
1176	29238	28221	28058	28718	26627	28716	28671	28296	26913	28927	28238.5	1027	1228	1094	988	1336	1033	1029	959	1134	1170	1099.8
1177	29331	28320	28156	28815	26704	28820	28775	28395	27013	29032	28336.1	1030	1231	1097	988	1341	1039	1036	962	1137	1176	1103.7
1178	29431	28443	28259	28925	26817	28934	28875	28523	27105	29163	28447.5	1034	1233	1100	988	1349	1042	1042	965	1138	1178	1106.9
1179	29544	28548	28356	29031	26912	29048	28970	28628	27193	29288	28551.8	1037	1234	1107	992	1354	1046	1042	972	1141	1185	1111
1180	29646	28650	28448	29138	27021	29170	29066	28746	27304	29387	28657.6	1043	1240	1112	995	1363	1050	1043	978	1150	1188	1116.2
1181	29747	28766	28565	29243	27128	29290	29177	28842	27406	29518	28768.2	1045	1248	1114	1000	1366	1058	1048	981	1153	1191	1120.4
1182	29867	28884	28666	29362	27230	29397	29297	28957	27516	29622	28879.8	1049	1255	1117	1004	1371	1062	1051	983	1155	1197	1124.4
1183	29970	28979	28772	29484	27344	29503	29408	29064	27611	29739	28987.4	1051	1262	1122	1006	1378	1066	1054	985	1160	1201	1128.5
1184	30088	29101	28882	29593	27441	29607	29514	29181	27714	29842	29096.3	1053	1266	1126	1012	1385	1070	1058	992	1167	1202	1133.1
1185	30198	29219	29001	29708	27531	29715	29628	29285	27821	29947	29205.3	1058	1273	1129	1016	1392	1074	1062	999	1171	1206	1138
1186	30311	29301	29103	29822	27649	29828	29745	29396	27930	30061	29314.6	1063	1276	1133	1018	1401	1078	1065	1003	1175	1209	1142.1
1187	30422	29408	29217	29932	27757	29946	29838	29498	28010	30178	29420.6	1066	1281	1140	1020	1402	1082	1071	1006	1178	1211	1145.7
1188	30536	29500	29323	30035	27851	30055	29957	29608	28094	30277	29523.6	1070	1287	1145	1022	1411	1084	1076	1009	1180	1219	1150.3
1189	30648	29623	29430	30149	27965	30143	30092	29708	28224	30380	29636.2	1076	1289	1149	1026	1418	1090	1080	1014	1184	1222	1154.8
1190	30750	29753	29572	30269	28078	30252	30215	29809	28334	30479	29751.1	1079	1292	1152	1029	1426	1093	1082	1019	1188	1229	1158.9
1191	30849	29862	29684	30378	28182	30365	30321	29931	28480	30578	29863	1084	1298	1158	1031	1431	1096	1086	1022	1191	1231	1162.8
1192	30959	29969	29787	30495	28287	30475	30440	30037	28585	30672	29970.6	1087	1306	1163	1034	1434	1098	1088	1025	1196	1235	1166.6
1193	31089	30078	29894	30605	28378	30578	30556	30153	28682	30788	30080.1	1089	1310	1164	1037	1438	1101	1092	1030	1200	1236	1169.7
1194	31211	30178	29999	30718	28488	30683	30676	30253	28788	30901	30189.5	1090	1316	1165	1041	1441	1106	1099	1035	1202	1243	1173.8
1195	31334	30292	30114	30831	28589	30762	30779	30372	28904	31000	30297.7	1095	1321	1168	1049	1448	1109	1104	1036	1206	1248	1178.4
1196	31453	30402	30243	30931	28692	30856	30904	30479	29018	31125	30410.3	1099	1327	1170	1051	1453	1114	1110	1038	1209	1253	1182.4
1197	31597	30522	30366	31043	28809	30946	31025	30572	29153	31229	30526.2	1100	1332	1176	1055	1459	1118	1113	1041	1213	1258	1186.5
1198	31717	30618	30480	31147	28901	31046	31149	30669	29259	31346	30633.2	1103	1338	1183	1059	1465	1121	1117	1043	1218	1260	1190.7
1199	31828	30747	30588	31256	29007	31165	31256	30771	29365	31467	30745	1106	1342	1184	1063	1470	1125	1121	1045	1222	1268	1194.6
1200	31921	30851	30682	31365	29120	31287	31367	30868	29482	31604	30854.7	1109	1350	1188	1068	1476	1127	1123	1047	1227	1269	1198.4
1201	32035	30960	30812	31482	29226	31409	31490	30983	29593	31719	30970.9	1114	1351	1194	1070	1483	1132	1129	1056	1231	1273	1203.3
1202	32144	31072	30911	31600	29322	31527	31621	31110	29689	31839	31083.5	1115	1353	1198	1073	1488	1137	1131	1059	1236	1277	1206.7
1203	32277	31184	31022	31708	29424	31657	31743	31229	29782	31956	31198.2	1119	1356	1201	1075	1493	1137	1134	1063	1246	1281	1210.5
1204	32398	31297	31124	31831	29540	31784	31856	31331	29892	32061	31311.4	1125	1362	1211	1078	1500	1138	1143	1067	1251	1285	1216
1205	32498	31414	31230	31940	29657	31908	31979	31449	29997	32189	31426.1	1136	1369	1212	1080	1506	1147	1146	1071	1259	1291	1221.7
1206	32640	31518	31335	32053	29783	32013	32099	31570	30122	32311	31544.4	1140	1374	1214	1084	1512	1152	1152	1076	1263	1299	1226.6
1207	32773	31641	31444	32181	29914	32138	32216	31710	30257	32414	31668.8	1141	1382	1217	1090	1517	1154	1158	1077	1265	1303	1230.4
1208	32928	31747	31562	32289	30036	32276	32326	31823	30361	32531	31787.9	1144	1384	1221	1094	1524	1159	1163	1081	1269	1309	1234.8
1209	33042	31850	31676	32406	30157	32395	32459	31941	30490	32630	31904.6	1149	1389	1228	1100	1531	1163	1168	1084	1274	1315	1240.1
1210	33142	31970	31772	32532	30262	32507	32581	32055	30614	32728	32016.3	1153	1395	1231	1102	1535	1168	1178	1091	1282	1320	1245.5
1211	33277	32095	31890	32652	30386	32629	32711	32184	30729	32835	32138.8	1162	1399	1238	1104	1540	1174	1180	1096	1287	1325	1250.5
1212	33417	32225	32016	32778	30498	32754	32825	32304	30844	32961	32262.2	1167	1402	1239	1110	1550	1180	1186	1100	1295	1333	1256.2
1213	33527	32342	32138	32913	30623	32862	32939	32411	30959	33083	32379.7	1170	1408	1243	1112	1559	1182	1189	1101	1303	1344	1261.1
1214	33637	32434	32246	33029	30740	32971	33064	32533	31070	33188	32491.2	1173	1415	1248	1119	1564	1187	1194	1104	1306	1351	1266.1
1215	33785	32563	32384	33160	30851	33085	33194	32649	31170	33302	32614.3	1177	1418	1251	1123	1568	1192	1199	1106	1308	1359	1270.1
1216	33916	32697	32489	33274	30978	33189	33314	32759	31293	33427	32733.6	1180	1424	1257	1129	1575	1195	1210	1112	1312	1366	1276
1217	34052	32835	32621	33391	31088	33301	33447	32875	31388	33545	32854.3	1187	1430	1264	1132	1579	1196	1220	1117	1323	1377	1282.5
1218	34149	32964	32736	33514	31190	33433	33573	32986	31521	33665	32973.1	1190	1432	1270	1138	1583	1202	1232	1123	1328	1380	1287.8
1219	34268	33074	32854	33651	31300	33557	33697	33117	31644	33811	33097.3	1199	1443	1273	1147	1586	1208	1240	1126	1334	1389	1294.5
1220	34387	33203	32981	33772	31423	33692	33803	33220	31770	33936	33218.7	1206	1451	1277	1147	1595	1212	1243	1131	1338	1392	1299.2
1221	34519	33312	33125	33909	31557	33807	33924	33334	31878	34042	33340.7	1212	1456	1285	1150	1599	1214	1251	1134	1343	1395	1303.9
1222	34657	33451	33246	34024	31653	33917	34069	33460	32001	34166	33464.4	1215	1460	1292	1153	1605	1221	1259	1139	1348	1399	1309.1
1223	34790	33571	33381	34152	31779	34032	34202	33576	32136	34302	33592.1	1217	1465	1294	1158	1609	1227	1264	1145	1356	1408	1314.3
1224	34923	33689	33499	34298	31886	34149	34314	33715	32256	34431	33716	1221	1472	1297	1158	1614	1232	1268	1151	1359	1409	1318.1
1225	35061	33831	33624	34424	31994	34271	34436	33826	32370	34568	33840.5	1228	1477	1300	1165	1621	1241	1270	1155	1364	1415	1323.6
1226	35180	33982	33749	34545	32111	34410	34577	33974	32485	34717	33973	1230	1484	1305	1169	1624	1247	1275	1162	1369	1418	1328.3
1227	35321	34119	33882	34678	32241	34532	34712	34102	32609	34876	34107.2	1233	1490	1309	1172	1631	1252	1287	1165	1374	1421	1333.4
1228	35466	34262	34016	34789	32380	34660	34840	34217	32726	34982	34233.8	1242	1494	1313	1177	1634	1252	1288	1172	1383	1426	1338.1
1229	35604	34384	34141	34927	32506	34787	34990	34352	32856	35108	34365.5	1245	1502	1321	1180	1640	1255	1295	1179	1390	1431	1343.8
1230	35758	34513	34256	35042	32649	34921	35106	34476	32967	35232	34492	1248	1510	1323	1182	1646	1266	1300	1181	1397	1436	1348.9
1231	35877	34636	34360	35170	32798	35054	35239	34596	33093	35348	34617.1	1254	1515	1328	1189	1658	1270	1303	1183	1400	1444	1354.4
1232	36036	34749	34475	35276	32914	35172	35367	34726	33231	35481	34742.7	1261	1524	1334	1193	1662	1274	1311	1185	1400	1447	1359.1
1233	36162	34851	34616	35408	33040	35296	35472	34852	33367	35610	34867.4	1270	1527	1340	1197	1668	1280	1318	1188	1404	1455	1364.7
1234	36294	35000	34748	35536	33171	35425	35592	34995	33473	35718	34995.2	1271	1535	1344	1201	1674	1285	1319	1188	1410	1458	1368.5
1235	36436	35140	34869	35654	33284	35559	35711	35088	33605	35846	35119.2	1275	1538	1350	1208	1675	1288	1321	1191	1416	1465	1372.7
1236	36570	35267	34991	35792	33405	35688	35848	35223	33731	35982	35249.7	1280	1544	1352	1214	1683	1293	1327	1199	1424	1475	1379.1
1237	36699	35404	35113	35920	33529	35827	35979	35329	33850	36138	35378.8	1285	1554	1356	1220	1690	1298	1329	1204	1429	1478	1384.3
1238	36860	35543	35219	36066	33657	35977	36130	35449	33975	36275	35515.1	1289	1566	1363	1221	1692	1300	1336	1207	1433	1486	1389.3
1239	37041	35669	35345	36199	33775	36115	36256	35581	34092	36414	35648.7	1291	1569	1365	1225	1703	1306	1339	1211	1437	1491	1393.7
1240	37200	35805	35481	36327	33906	36253	36405	35735	34226	36556	35789.4	1294	1576	1370	1227	1710	1315	1345	1218	1444	1501	1400
1241	37335	35944	35615	36440	34046	36382	36531	35851	34348	36702	35919.4	1298	1583	1380	1230	1720	1319	1349	1221	1453	1509	1406.2
1242	37472	36075	35746	36576	34181	36543	36672	35978	34494	36859	36059.6	1304	1588	1385	1233	1732	1327	1357	1227	1458	1519	1413
1243	37601	36209	35880	36701	34291	36685	36831	36110	34623	36997	36192.8	1310	1594	1390	1239	1736	1333	1362	1233	1462	1530	1418.9
1244	37742	36337	36028	36828	34429	36819	36970	36237	34760	37134	36328.4	1313	1603	1398	1242	1741	1337	1365	1236	1470	1533	1423.8
1245	37893	36476	36158	36968	34546	36950	37099	36383	34886	37274	36463.3	1317	1610	1403	1247	1751	1343	1370	1239	1479	1535	1429.4
1246	38034	36633	36298	37121	34671	37094	37229	36501	35030	37411	36602.2	1324	1613	1408	1254	1761	1347	1376	1243	1488	1540	1435.4
1247	38192	36745	36442	37258	34784	37241	37369	36641	35148	37561	36738.1	1326	1618	1420	1260	1768	1350	1387	1248	1492	1551	1442
1248	38351	36890	36588	37416	34925	37379	37500	36796	35270	37704	36881.9	1331	1623	1429	1262	1776	1352	1393	1250	1501	1559	1447.6
1249	38490	37028	36719	37557	35029	37526	37613	36930	35397	37844	37013.3	1337	1628	1437	1267	1782	1362	1397	1253	1505	1563	1453.1
1250	38620	37154	36864	37692	35155	37687	37762	37085	35501	38007	37152.7	1341	1633	1441	1270	1787	1365	1403	1254	1512	1570	1457.6
1251	38776	37289	37010	37828	35265	37833	37888	37228	35625	38163	37290.5	1344	1639	1443	1278	1792	1366	1410	1259	1516	1574	1462.1
1252	38901	37445	37162	37971	35389	37967	38026	37370	35751	38302	37428.4	1349	1643	1446	1280	1797	1372	1416	1260	1518	1582	1466.3
1253	39039	37601	37307	38115	35541	38124	38147	37511	35883	38429	37569.7	1359	1652	1449	1287	1802	1375	1420	1265	1521	1590	1472
1254	39192	37736	37447	38247	35677	38273	38288	37655	36046	38570	37713.1	1364	1661	1453	1289	1808	1376	1423	1269	1525	1596	1476.4
1255	39353	37890	37573	38403	35800	38423	38420	37795	36173	38721	37855.1	1367	1669	1456	1291	1819	1382	1429	1275	1531	1601	1482
1256	39490	38036	37715	38553	35925	38570	38560	37917	36305	38852	37992.3	1370	1678	1464	1295	1823	1387	1438	1281	1536	1610	1488.2
1257	39654	38191	37857	38712	36038	38703	38674	38049	36425	38985	38128.8	1380	1679	1468	1297	1830	1388	1440	1286	1544	1614	1492.6
1258	39796	38344	38019	38838	36174	38847	38818	38165	36560	39113	38267.4	1386	1681	1475	1304	1839	1393	1444	1291	1553	1622	1498.8
1259	39918	38490	38161	38983	36295	38997	38959	38287	36699	39241	38403	1391	1689	1482	1312	1845	1400	1451	1299	1558	1626	1505.3
1260	40069	38622	38318	39130	36425	39143	39119	38432	36846	39384	38548.8	1391	1695	1486	1320	1849	1407	1454	1302	1561	1633	1509.8
1261	40207	38754	38441	39270	36560	39273	39264	38569	36975	39498	38681.1	1398	1702	1490	1325	1855	1415	1462	1305	1568	1644	1516.4
1262	40352	38883	38572	39407	36703	39425	39423	38719	37134	39624	38824.2	1405	1708	1493	1331	1868	1423	1471	1311	1576	1653	1523.9
1263	40492	39047	38706	39558	36846	39588	39578	38866	37288	39757	38972.6	1413	1716	1498	1335	1876	1429	1474	1317	1579	1657	1529.4
1264	40657	39201	38850	39701	36989	39705	39737	39037	37432	39913	39122.2	1417	1726	1503	1343	1879	1434	1475	1322	1583	1664	1534.6
1265	40811	39336	39013	39835	37126	39863	39891	39177	37576	40045	39267.3	1420	1729	1510	1351	1888	1436	1482	1326	1589	1667	1539.8
1266	40984	39483	39156	39987	37241	40038	40060	39327	37715	40196	39418.7	1429	1733	1517	1357	1899	1443	1486	1331	1596	1671	1546.2
1267	41132	39623	39296	40149	37371	40187	40203	39474	37875	40344	39565.4	1435	1737	1521	1362	1905	1452	1489	1336	1603	1678	1551.8
1268	41294	39766	39443	40322	37508	40349	40344	39614	38020	40475	39713.5	1446	1745	1529	1363	1911	1458	1493	1343	1612	1683	1558.3
1269	41451	39900	39601	40498	37650	40494	40489	39743	38142	40642	39861	1452	1751	1533	1365	1918	1464	1503	1351	1617	1693	1564.7
1270	41606	40057	39734	40651	37794	40649	40652	39907	38275	40786	40011.1	1458	1763	1539	1372	1926	1465	1507	1356	1622	1697	1570.5
1271	41746	40204	39862	40836	37937	40786	40792	40058	38424	40935	40158	1460	1771	1540	1377	1935	1470	1511	1357	1630	1703	1575.4
1272	41898	40355	40018	40982	38072	40947	40964	40219	38575	41096	40312.6	1465	1779	1546	1378	1946	1481	1514	1362	1634	1710	1581.5
1273	42029	40493	40163	41139	38204	41117	41106	40392	38708	41237	40458.8	1472	1789	1554	1383	1952	1489	1517	1366	1642	1719	1588.3
1274	42179	40623	40327	41303	38343	41275	41255	40536	38853	41397	40609.1	1478	1799	1559	1389	1962	1496	1522	1373	1653	1727	1595.8
1275	42324	40775	40477	41452	38494	41431	41413	40702	39011	41562	40764.1	1483	1811	1562	1398	1969	1501	1531	1377	1658	1733	1602.3
1276	42485	40921	40626	41610	38616	41574	41566	40870	39146	41719	40913.3	1488	1819	1569	1404	1975	1505	1538	1382	1664	1735	1607.9
1277	42636	41061	40768	41772	38768	41732	41711	41029	39281	41874	41063.2	1493	1824	1576	1407	1984	1511	1543	1388	1670	1740	1613.6
1278	42814	41169	40904	41933	38927	41887	41842	41194	39406	42024	41210	1498	1829	1580	1414	1994	1517	1547	1395	1674	1755	1620.3
1279	42965	41321	41072	42077	39060	42025	41983	41358	39566	42178	41360.5	1504	1842	1586	1420	1999	1521	1552	1402	1682	1764	1627.2
1280	43115	41486	41231	42254	39197	42188	42130	41515	39747	42341	41520.4	1507	1851	1595	1423	2005	1526	1559	1407	1685	1770	1632.8
1281	43272	41643	41395	42388	39366	42362	42284	41677	39872	42495	41675.4	1514	1855	1601	1430	2010	1533	1565	1409	1689	1779	1638.5
1282	43431	41783	41558	42561	39523	42521	42459	41840	40010	42649	41833.5	1518	1861	1607	1434	2017	1540	1568	1413	1696	1789	1644.3
1283	43601	41942	41726	42697	39659	42706	42607	41999	40160	42792	41988.9	1528	1868	1616	1442	2024	1551	1577	1414	1700	1796	1651.6
1284	43751	42106	41879	42846	39807	42865	42754	42165	40285	42953	42141.1	1532	1869	1621	1453	2030	1558	1582	1424	1708	1801	1657.8
1285	43938	42245	42005	42979	39953	43028	42921	42322	40449	43104	42294.4	1537	1871	1630	1460	2041	1571	1587	1429	1711	1808	1664.5
1286	44110	42419	42164	43144	40103	43162	43076	42466	40618	43268	42453	1541	1876	1636	1471	2048	1578	1595	1437	1712	1817	1671.1
1287	44283	42581	42316	43303	40247	43324	43213	42605	40776	43417	42606.5	1548	1885	1640	1480	2059	1587	1602	1444	1719	1821	1678.5
1288	44463	42754	42467	43487	40397	43469	43360	42783	40933	43586	42769.9	1553	1887	1646	1484	2069	1591	1611	1449	1724	1831	1684.5
1289	44641	42902	42625	43642	40566	43640	43520	42935	41064	43739	42927.4	1562	1893	1652	1487	2076	1598	1619	1453	1736	1838	1691.4
1290	44799	43066	42795	43779	40713	43819	43678	43099	41203	43920	43087.1	1572	1899	1655	1495	2088	1599	1621	1457	1742	1847	1697.5
1291	44950	43219	42945	43963	40864	43987	43846	43275	41335	44092	43247.6	1575	1909	1661	1499	2089	1604	1626	1460	1754	1853	1703
1292	45096	43381	43093	44117	41006	44155	44004	43419	41477	44262	43401	1584	1912	1664	1508	2095	1614	1634	1463	1764	1859	1709.7
1293	45273	43532	43252	44252	41151	44310	44152	43574	41630	44422	43554.8	1588	1918	1670	1512	2108	1619	1643	1466	1770	1863	1715.7
1294	45443	43687	43427	44432	41301	44476	44321	43757	41765	44592	43720.1	1599	1926	1678	1518	2115	1627	1649	1471	1773	1868	1722.4
1295	45599	43846	43606	44606	41421	44646	44485	43928	41912	44759	43880.8	1604	1929	1682	1526	2121	1632	1660	1476	1781	1872	1728.3
1296	45759	44022	43769	44759	41579	44818	44637	44125	42076	44933	44047.7	1614	1940	1689	1533	2133	1639	1667	1482	1790	1875	1736.2
1297	45939	44192	43954	44915	41762	44989	44833	44288	42228	45114	44221.4	1619	1949	1697	1537	2139	1649	1672	1490	1795	1879	1742.6
1298	46124	44345	44110	45097	41942	45150	45006	44450	42383	45269	44387.6	1620	1957	1707	1539	2150	1654	1680	1495	1800	1890	1749.2
1299	46290	44495	44243	45295	42083	45303	45160	44613	42546	45431	44545.9	1634	1961	1714	1544	2152	1664	1683	1500	1804	1893	1754.9
1300	46469	44653	44403	45450	42201	45483	45332	44792	42694	45584	44706.1	1640	1966	1719	1553	2166	1669	1695	1512	1807	1896	1762.3
1301	46638	44821	44572	45612	42372	45653	45513	44998	42847	45768	44879.4	1647	1973	1727	1557	2173	1672	1699	1515	1814	1902	1767.9
1302	46802	44968	44744	45825	42528	45840	45682	45179	42994	45944	45050.6	1651	1979	1731	1567	2178	1679	1700	1523	1818	1904	1773
1303	46967	45121	44908	45975	42698	46007	45841	45354	43150	46126	45214.7	1659	1984	1736	1577	2182	1685	1706	1526	1824	1913	1779.2
1304	47164	45283	45068	46186	42879	46181	46038	45525	43312	46312	45394.8	1665	1991	1740	1582	2188	1692	1709	1532	1832	1918	1784.9
1305	47352	45472	45245	46365	43038	46335	46200	45698	43476	46493	45567.4	1672	1999	1745	1588	2193	1696	1717	1539	1837	1928	1791.4
1306	47529	45622	45438	46540	43185	46479	46376	45857	43616	46659	45730.1	1678	2009	1753	1593	2205	1698	1722	1544	1846	1935	1798.3
1307	47722	45789	45591	46711	43369	46630	46548	46047	43769	46845	45902.1	1685	2016	1757	1601	2214	1706	1726	1555	1849	1942	1805.1
1308	47891	45974	45757	46902	43504	46805	46702	46208	43921	47008	46067.2	1690	2026	1763	1606	2227	1710	1730	1563	1855	1952	1812.2
1309	48084	46131	45934	47076	43675	46987	46877	46374	44092	47206	46243.6	1699	2039	1774	1611	2235	1719	1737	1575	1861	1956	1820.6
1310	48255	46300	46088	47246	43833	47169	47054	46518	44269	47392	46412.4	1705	2048	1780	1621	2247	1721	1741	1578	1869	1962	1827.2
1311	48439	46450	46257	47425	44010	47358	47252	46695	44424	47582	46589.2	1712	2060	1791	1626	2258	1729	1745	1583	1878	1968	1835
1312	48621	46620	46406	47591	44164	47536	47412	46885	44599	47782	46761.6	1725	2065	1798	1633	2266	1734	1753	1585	1889	1975	1842.3
1313	48801	46786	46595	47770	44316	47737	47571	47048	44756	47973	46935.3	1734	2073	1807	1636	2271	1745	1760	1590	1895	1985	1849.6
1314	48993	46983	46789	47944	44491	47913	47738	47234	44927	48159	47117.1	1741	2078	1813	1642	2281	1750	1766	1597	1902	1993	1856.3
1315	49186	47153	46992	48108	44647	48092	47926	47390	45097	48373	47296.4	1744	2087	1820	1650	2283	1755	1770	1600	1908	1999	1861.6
1316	49355	47348	47143	48303	44808	48265	48114	47553	45281	48560	47473	1748	2090	1824	1658	2291	1760	1777	1608	1920	2014	1869
1317	49539	47512	47315	48461	44990	48454	48301	47729	45436	48746	47648.3	1761	2094	1835	1668	2297	1767	1787	1612	1925	2021	1876.7
1318	49704	47700	47483	48631	45143	48624	48491	47915	45621	48954	47826.6	1765	2099	1843	1680	2305	1775	1794	1617	1933	2029	1884
1319	49882	47884	47663	48818	45283	48810	48650	48085	45779	49112	47996.6	1769	2110	1845	1684	2311	1782	1801	1627	1946	2039	1891.4
1320	50066	48069	47841	49006	45463	48992	48833	48262	45960	49268	48176	1778	2118	1849	1688	2320	1786	1808	1632	1953	2048	1898
1321	50251	48254	48039	49206	45636	49183	49016	48431	46151	49460	48362.7	1788	2128	1855	1697	2326	1792	1818	1642	1958	2057	1906.1
1322	50430	48429	48244	49370	45781	49351	49189	48628	46316	49672	48541	1798	2133	1861	1705	2337	1798	1825	1648	1963	2065	1913.3
1323	50603	48620	48447	49555	45980	49544	49366	48823	46481	49855	48727.4	1805	2144	1869	1713	2344	1806	1830	1657	1968	2071	1920.7
1324	50802	48797	48657	49730	46182	49712	49558	48986	46627	50041	48909.2	1820	2155	1873	1728	2350	1815	1836	1662	1980	2077	1929.6
1325	50978	48982	48842	49914	46322	49915	49692	49176	46796	50205	49082.2	1828	2162	1879	1739	2355	1823	1849	1671	1992	2087	1938.5
1326	51155	49196	49050	50116	46523	50100	49896	49353	46984	50410	49278.3	1832	2171	1883	1743	2367	1831	1858	1679	2000	2089	1945.3
1327	51332	49345	49223	50316	46700	50287	50095	49538	47152	50610	49459.8	1838	2180	1889	1748	2371	1838	1870	1690	2011	2092	1952.7
1328	51524	49513	49411	50509	46902	50471	50282	49731	47321	50779	49644.3	1843	2189	1904	1754	2383	1845	1876	1695	2018	2102	1960.9
1329	51709	49692	49599	50697	47089	50657	50467	49885	47490	50971	49825.6	1850	2193	1917	1761	2392	1851	1886	1707	2028	2111	1969.6
1330	51882	49881	49783	50910	47258	50856	50660	50066	47647	51172	50011.5	1856	2204	1924	1772	2400	1859	1888	1713	2037	2116	1976.9
1331	52110	50060	49966	51114	47428	51017	50851	50256	47826	51359	50198.7	1859	2216	1934	1775	2403	1867	1893	1721	2049	2128	1984.5
1332	52258	50232	50144	51312	47594	51215	51046	50441	48018	51559	50381.9	1865	2221	1942	1782	2416	1873	1897	1736	2058	2133	1992.3
1333	52441	50394	50342	51508	47795	51415	51220	50646	48223	51775	50575.9	1870	2230	1951	1789	2420	1873	1900	1744	2063	2146	1998.6
1334	52638	50583	50537	51687	47979	51613	51419	50855	48396	51967	50767.4	1877	2238	1959	1799	2427	1880	1909	1749	2076	2153	2006.7
1335	52856	50784	50732	51868	48151	51772	51604	51021	48580	52155	50952.3	1880	2244	1968	1813	2439	1885	1921	1753	2082	2159	2014.4
1336	53035	51003	50897	52055	48320	51970	51815	51216	48744	52344	51139.9	1884	2252	1974	1818	2448	1889	1923	1757	2087	2168	2020
1337	53234	51198	51079	52247	48493	52171	52001	51396	48942	52575	51333.6	1895	2266	1981	1823	2463	1899	1927	1762	2090	2177	2028.3
1338	53423	51395	51247	52459	48664	52374	52194	51586	49124	52788	51525.4	1901	2274	1990	1841	2475	1905	1931	1769	2099	2183	2036.8
1339	53623	51586	51434	52664	48830	52558	52401	51789	49307	52985	51717.7	1907	2284	1998	1851	2491	1909	1936	1772	2109	2186	2044.3
1340	53846	51819	51601	52879	49034	52755	52602	51999	49477	53209	51922.1	1911	2295	2008	1855	2500	1914	1941	1774	2124	2196	2051.8
1341	54045	52019	51787	53078	49225	52949	52792	52208	49661	53411	52117.5	1920	2300	2014	1865	2510	1922	1948	1784	2130	2201	2059.4
1342	54256	52193	51961	53267	49387	53130	52977	52376	49859	53612	52301.8	1931	2311	2026	1869	2523	1929	1956	1791	2143	2205	2068.4
1343	54476	52376	52130	53484	49566	53313	53161	52566	50039	53822	52493.3	1941	2323	2033	1875	2530	1933	1967	1799	2144	2213	2075.8
1344	54665	52577	52312	53692	49741	53528	53354	52786	50244	54013	52691.2	1947	2335	2047	1885	2538	1942	1972	1806	2156	2223	2085.1
1345	54858	52777	52501	53879	49932	53716	53554	52983	50411	54208	52881.9	1955	2340	2057	1889	2546	1952	1976	1814	2161	2228	2091.8
1346	55054	52945	52693	54075	50138	53927	53745	53195	50585	54393	53075	1965	2347	2063	1894	2557	1960	1981	1817	2167	2239	2099
1347	55255	53144	52883	54240	50327	54134	53964	53411	50757	54575	53269	1973	2360	2070	1898	2567	1967	1984	1830	2173	2244	2106.6
1348	55470	53355	53068	54434	50516	54327	54162	53598	50956	54793	53467.9	1978	2369	2075	1900	2575	1978	1988	1836	2181	2253	2113.3
1349	55658	53543	53252	54639	50709	54540	54359	53770	51169	54992	53663.1	1985	2380	2082	1904	2583	1985	1999	1846	2186	2265	2121.5
1350	55858	53730	53464	54857	50909	54718	54551	53958	51347	55204	53859.6	1998	2388	2091	1912	2594	1991	2010	1851	2194	2280	2130.9
1351	56057	53920	53666	55075	51120	54901	54730	54130	51521	55420	54054	2001	2398	2101	1920	2609	1998	2019	1855	2209	2284	2139.4
1352	56272	54087	53836	55256	51313	55113	54941	54323	51725	55624	54249	2003	2402	2112	1927	2619	2007	2025	1862	2210	2295	2146.2
1353	56472	54307	54029	55506	51508	55355	55136	54540	51921	55848	54462.2	2012	2410	2119	1933	2630	2013	2033	1868	2221	2304	2154.3
1354	56666	54522	54227	55739	51688	55568	55330	54722	52117	56037	54661.6	2018	2421	2128	1938	2642	2021	2043	1881	2228	2313	2163.3
1355	56872	54731	54426	55928	51848	55750	55539	54912	52312	56278	54859.6	2028	2430	2141	1946	2650	2025	2050	1884	2243	2322	2171.9
1356	57066	54925	54642	56152	52021	55942	55748	55125	52512	56472	55060.5	2030	2440	2145	1950	2660	2035	2063	1886	2253	2332	2179.4
1357	57278	55118	54863	56391	52214	56137	55995	55330	52715	56680	55272.1	2038	2456	2151	1953	2666	2044	2070	1891	2256	2340	2186.5
1358	57513	55341	55069	56578	52415	56321	56207	55539	52946	56890	55481.9	2044	2467	2158	1961	2678	2052	2077	1899	2263	2350	2194.9
1359	57719	55534	55266	56772	52605	56531	56401	55739	53123	57109	55679.9	2049	2475	2171	1968	2695	2060	2086	1902	2268	2357	2203.1
1360	57914	55768	55466	56963	52781	56752	56608	55942	53338	57298	55883	2059	2486	2177	1972	2704	2068	2090	1910	2278	2362	2210.6
1361	58135	55974	55659	57171	52988	56952	56844	56180	53527	57491	56092.1	2064	2500	2182	1981	2718	2077	2097	1918	2286	2378	2220.1
1362	58362	56203	55865	57399	53159	57176	57075	56367	53720	57687	56301.3	2070	2512	2187	1991	2722	2085	2104	1926	2295	2389	2228.1
1363	58579	56397	56104	57607	53346	57407	57303	56567	53913	57909	56513.2	2078	2523	2191	1998	2728	2092	2110	1934	2306	2400	2236
1364	58790	56620	56302	57818	53530	57616	57532	56790	54109	58118	56722.5	2084	2534	2202	2001	2736	2096	2122	1941	2311	2408	2243.5
1365	59003	56843	56528	58044	53737	57837	57744	57001	54303	58333	56937.3	2092	2544	2210	2007	2743	2106	2136	1949	2322	2418	2252.7
1366	59175	57026	56729	58282	53957	58059	57982	57209	54499	58546	57146.4	2101	2553	2220	2017	2752	2117	2144	1960	2335	2428	2262.7
1367	59392	57274	56950	58509	54194	58269	58193	57430	54700	58771	57368.2	2115	2561	2228	2025	2761	2128	2148	1965	2343	2437	2271.1
1368	59608	57484	57162	58693	54389	58493	58403	57638	54906	58972	57574.8	2127	2567	2239	2033	2767	2138	2154	1971	2352	2447	2279.5
1369	59820	57710	57353	58913	54605	58699	58631	57825	55119	59214	57788.9	2134	2574	2248	2039	2782	2144	2164	1980	2357	2457	2287.9
1370	60030	57904	57538	59114	54792	58895	58851	58027	55332	59451	57993.4	2140	2584	2254	2048	2795	2151	2172	1989	2361	2468	2296.2
1371	60278	58106	57741	59370	55020	59099	59073	58230	55542	59664	58212.3	2150	2594	2259	2056	2807	2161	2178	1997	2368	2476	2304.6
1372	60486	58313	57948	59576	55240	59312	59309	58445	55727	59873	58422.9	2156	2605	2268	2064	2818	2165	2186	2005	2381	2484	2313.2
1373	60709	58551	58162	59779	55444	59533	59547	58674	55934	60126	58645.9	2166	2610	2279	2071	2836	2173	2191	2020	2390	2492	2322.8
1374	60911	58786	58368	59981	55659	59759	59785	58911	56141	60329	58863	2173	2620	2290	2077	2848	2181	2199	2030	2400	2501	2331.9
1375	61116	59009	58568	60181	55900	59953	60021	59115	56356	60566	59078.5	2177	2629	2297	2084	2859	2187	2206	2039	2407	2508	2339.3
1376	61339	59218	58774	60432	56141	60178	60243	59345	56573	60796	59303.9	2183	2637	2306	2090	2871	2198	2214	2050	2415	2520	2348.4
1377	61585	59411	58996	60661	56394	60407	60453	59549	56755	61017	59522.8	2191	2649	2317	2098	2882	2205	2222	2061	2428	2526	2357.9
1378	61832	59642	59210	60884	56580	60634	60684	59760	56968	61251	59744.5	2201	2658	2328	2102	2890	2217	2229	2067	2444	2533	2366.9
1379	62059	59863	59424	61106	56795	60883	60915	59988	57188	61451	59967.2	2209	2665	2339	2115	2898	2222	2239	2079	2449	2540	2375.5
1380	62321	60090	59660	61364	56976	61108	61117	60207	57399	61672	60191.4	2217	2670	2349	2122	2914	2234	2243	2084	2457	2553	2384.3
1381	62550	60327	59884	61587	57203	61367	61367	60445	57606	61903	60423.9	2226	2686	2355	2132	2923	2245	2254	2095	2468	2564	2394.8
1382	62790	60574	60120	61806	57412	61605	61593	60631	57817	62110	60645.8	2235	2697	2363	2139	2934	2253	2261	2102	2478	2578	2404
1383	63009	60774	60363	62043	57612	61862	61827	60825	58039	62332	60868.6	2245	2711	2370	2148	2946	2263	2271	2104	2486	2589	2413.3
1384	63235	61021	60604	62253	57827	62075	62084	61061	58272	62561	61099.3	2254	2722	2380	2156	2961	2265	2280	2110	2495	2597	2422
1385	63476	61213	60829	62474	58026	62304	62294	61296	58493	62827	61323.2	2259	2735	2388	2164	2974	2276	2289	2118	2505	2606	2431.4
1386	63688	61452	61078	62697	58257	62550	62504	61527	58675	63061	61548.9	2264	2751	2394	2177	2982	2287	2297	2126	2509	2618	2440.5
1387	63958	61684	61305	62943	58474	62786	62716	61726	58893	63302	61778.7	2271	2774	2409	2182	2990	2294	2306	2131	2516	2630	2450.3
1388	64206	61934	61537	63216	58747	63038	62952	61947	59110	63528	62021.5	2282	2782	2420	2188	3005	2301	2317	2141	2526	2641	2460.3
1389	64465	62140	61755	63473	58969	63282	63183	62177	59349	63779	62257.2	2292	2794	2429	2201	3019	2313	2326	2148	2534	2648	2470.4
1390	64708	62354	61998	63696	59178	63523	63433	62408	59557	64017	62487.2	2298	2806	2436	2212	3028	2319	2338	2152	2544	2662	2479.5
1391	64929	62605	62251	63915	59400	63765	63643	62645	59796	64250	62719.9	2308	2814	2446	2215	3055	2326	2347	2156	2558	2674	2489.9
1392	65148	62858	62458	64131	59617	64011	63886	62915	60038	64489	62955.1	2316	2818	2456	2224	3066	2337	2356	2162	2562	2690	2498.7
1393	65386	63106	62707	64336	59826	64225	64148	63164	60239	64710	63184.7	2324	2830	2464	2231	3075	2348	2366	2169	2574	2699	2508
1394	65647	63348	62948	64551	60043	64454	64374	63418	60464	64980	63422.7	2337	2839	2471	2245	3091	2355	2376	2177	2585	2715	2519.1
1395	65893	63548	63177	64786	60266	64679	64589	63642	60681	65226	63648.7	2344	2849	2479	2250	3103	2372	2390	2185	2597	2727	2529.6
1396	66141	63780	63422	65006	60473	64908	64839	63859	60902	65453	63878.3	2352	2860	2489	2256	3119	2380	2401	2193	2609	2743	2540.2
1397	66395	64037	63647	65237	60718	65158	65079	64080	61122	65689	64116.2	2362	2871	2500	2262	3132	2389	2406	2206	2619	2755	2550.2
1398	66675	64287	63881	65466	60925	65377	65326	64295	61358	65937	64352.7	2372	2882	2509	2272	3147	2402	2414	2215	2632	2767	2561.2
1399	66929	64559	64112	65719	61138	65636	65573	64560	61619	66196	64604.1	2381	2892	2522	2280	3152	2405	2421	2226	2640	2781	2570
1400	67202	64780	64354	65963	61363	65889	65831	64764	61848	66434	64842.8	2387	2902	2535	2290	3165	2415	2437	2234	2649	2793	2580.7
1401	67461	65011	64613	66214	61601	66131	66063	64984	62077	66638	65079.3	2397	2914	2542	2300	3178	2422	2448	2249	2658	2804	2591.2
1402	67711	65274	64847	66474	61825	66380	66314	65230	62280	66871	65320.6	2407	2920	2553	2307	3189	2429	2460	2257	2668	2812	2600.2
1403	67968	65512	65072	66726	62046	66592	66596	65455	62501	67128	65559.6	2415	2931	2563	2315	3197	2437	2472	2263	2676	2819	2608.8
1404	68228	65736	65308	66998	62315	66847	66843	65701	62759	67397	65813.2	2420	2942	2578	2324	3208	2446	2486	2270	2683	2832	2618.9
1405	68471	66020	65558	67223	62553	67122	67100	65937	63000	67640	66062.4	2424	2957	2589	2333	3214	2457	2497	2280	2692	2843	2628.6
1406	68726	66286	65835	67481	62779	67362	67332	66151	63254	67879	66308.5	2434	2969	2601	2340	3220	2463	2502	2294	2705	2855	2638.3
1407	68991	66500	66060	67720	63009	67617	67607	66417	63490	68116	66552.7	2447	2984	2614	2348	3227	2477	2509	2306	2715	2862	2648.9
1408	69264	66758	66322	67979	63241	67843	67872	66671	63743	68375	66806.8	2455	3003	2623	2357	3239	2487	2518	2318	2728	2873	2660.1
1409	69504	67020	66589	68203	63468	68067	68107	66903	63979	68594	67043.4	2467	3012	2631	2363	3247	2491	2526	2324	2747	2887	2669.5
1410	69773	67276	66835	68456	63700	68297	68346	67164	64271	68879	67299.7	2476	3020	2639	2372	3262	2502	2532	2338	2760	2895	2679.6
1411	70069	67529	67089	68719	63942	68528	68618	67422	64558	69174	67564.8	2489	3031	2652	2382	3277	2514	2540	2351	2775	2906	2691.7
1412	70326	67767	67331	68973	64173	68792	68868	67677	64803	69442	67815.2	2494	3049	2664	2392	3289	2522	2554	2358	2784	2918	2702.4
1413	70586	68014	67542	69208	64426	69066	69138	67940	65059	69707	68068.6	2503	3059	2673	2397	3300	2534	2565	2364	2790	2926	2711.1
1414	70871	68273	67800	69458	64648	69311	69392	68171	65303	69966	68319.3	2509	3071	2684	2403	3311	2542	2576	2376	2803	2934	2720.9
1415	71118	68524	68023	69737	64893	69600	69664	68435	65560	70242	68579.6	2517	3082	2696	2408	3326	2548	2588	2384	2818	2944	2731.1
1416	71395	68758	68271	69975	65153	69848	69928	68693	65821	70498	68834	2526	3092	2706	2414	3341	2556	2605	2389	2826	2958	2741.3
1417	71642	69020	68529	70226	65391	70098	70182	68930	66068	70750	69083.6	2538	3103	2721	2421	3349	2566	2616	2397	2836	2966	2751.3
1418	71907	69274	68773	70488	65639	70381	70448	69207	66291	70956	69336.4	2546	3113	2730	2431	3361	2579	2625	2402	2848	2973	2760.8
1419	72181	69566	69039	70774	65893	70634	70665	69458	66543	71204	69595.7	2551	3128	2739	2442	3376	2592	2632	2409	2855	2981	2770.5
1420	72450	69854	69309	71011	66122	70896	70944	69681	66768	71445	69848	2563	3134	2746	2450	3389	2599	2640	2425	2869	2993	2780.8
1421	72717	70097	69550	71268	66355	71164	71219	69938	67034	71715	70105.7	2571	3146	2753	2456	3402	2610	2649	2435	2886	3004	2791.2
1422	72979	70361	69827	71560	66641	71448	71475	70206	67291	71998	70378.6	2582	3158	2764	2466	3418	2624	2664	2442	2899	3018	2803.5
1423	73263	70636	70068	71803	66899	71712	71718	70436	67536	72273	70634.4	2588	3168	2774	2474	3432	2636	2670	2451	2903	3032	2812.8
1424	73563	70900	70316	72070	67143	71983	71977	70706	67795	72528	70898.1	2597	3181	2785	2484	3445	2641	2681	2457	2914	3042	2822.7
1425	73818	71164	70583	72341	67371	72240	72227	70999	68079	72773	71159.5	2602	3192	2790	2490	3456	2647	2694	2466	2929	3052	2831.8
1426	74085	71415	70861	72619	67664	72495	72499	71262	68319	73046	71426.5	2611	3208	2800	2491	3475	2655	2705	2478	2940	3072	2843.5
1427	74344	71683	71103	72921	67911	72756	72753	71536	68582	73306	71689.5	2616	3220	2813	2502	3493	2662	2715	2485	2954	3085	2854.5
1428	74616	71952	71382	73151	68157	73032	73003	71789	68815	73573	71947	2626	3230	2820	2511	3505	2676	2731	2497	2963	3095	2865.4
1429	74903	72231	71622	73453	68397	73302	73267	72052	69078	73853	72215.8	2634	3236	2828	2518	3520	2687	2741	2506	2973	3106	2874.9
1430	75208	72479	71884	73722	68620	73573	73548	72329	69302	74118	72478.3	2648	3248	2837	2530	3534	2695	2760	2518	2983	3119	2887.2
1431	75465	72733	72119	73991	68875	73851	73807	72609	69551	74388	72738.9	2663	3262	2849	2544	3551	2705	2768	2526	2993	3134	2899.5
1432	75740	72999	72385	74268	69105	74116	74065	72903	69834	74657	73007.2	2674	3268	2863	2559	3557	2719	2778	2537	3005	3144	2910.4
1433	76019	73270	72669	74539	69370	74385	74332	73172	70105	74907	73276.8	2686	3279	2874	2574	3573	2726	2793	2551	3017	3158	2923.1
1434	76305	73552	72924	74811	69627	74666	74623	73435	70359	75214	73551.6	2698	3293	2885	2579	3582	2735	2807	2560	3035	3182	2935.6
1435	76596	73826	73216	75102	69885	74931	74912	73708	70639	75505	73832	2715	3308	2891	2589	3595	2747	2819	2573	3048	3195	2948
1436	76870	74094	73469	75382	70121	75243	75160	73963	70889	75781	74097.2	2725	3324	2897	2593	3608	2759	2827	2579	3058	3207	2957.7
1437	77150	74354	73743	75656	70391	75537	75444	74234	71143	76051	74370.3	2736	3332	2906	2603	3618	2776	2837	2588	3071	3219	2968.6
1438	77467	74649	74020	75936	70616	75801	75698	74508	71410	76311	74641.6	2755	3343	2912	2620	3627	2785	2845	2596	3082	3234	2979.9
1439	77714	74933	74288	76203	70886	76078	75983	74783	71671	76595	74913.4	2758	3355	2930	2633	3644	2800	2860	2606	3096	3247	2992.9
1440	78021	75195	74567	76487	71153	76359	76266	75074	71939	76883	75194.4	2774	3365	2940	2646	3663	2810	2871	2616	3110	3258	3005.3
1441	78304	75446	74837	76786	71410	76635	76538	75373	72188	77177	75469.4	2781	3375	2954	2659	3675	2817	2884	2621	3119	3271	3015.6
1442	78604	75710	75098	77061	71673	76966	76827	75649	72437	77494	75751.9	2789	3387	2962	2669	3693	2826	2893	2628	3135	3280	3026.2
1443	78897	76003	75422	77366	71950	77232	77123	75947	72709	77772	76042.1	2795	3399	2971	2682	3705	2838	2903	2640	3145	3292	3037
1444	79195	76268	75717	77672	72211	77519	77388	76229	72967	78065	76323.1	2804	3409	2987	2690	3721	2851	2916	2649	3153	3298	3047.8
1445	79487	76546	75992	77972	72477	77797	77687	76532	73213	78340	76604.3	2812	3425	2996	2698	3742	2862	2921	2660	3159	3312	3058.7
1446	79750	76837	76279	78242	72750	78090	77989	76817	73481	78620	76885.5	2826	3435	3010	2709	3759	2875	2930	2672	3170	3331	3071.7
1447	80051	77105	76560	78523	73030	78395	78261	77116	73730	78900	77167.1	2839	3451	3024	2719	3772	2892	2946	2689	3182	3339	3085.3
1448	80340	77364	76865	78802	73301	78678	78548	77413	74021	79146	77447.8	2846	3466	3029	2731	3787	2900	2960	2696	3195	3353	3096.3
1449	80667	77652	77131	79063	73549	78984	78874	77729	74313	79423	77738.5	2857	3479	3034	2742	3811	2918	2968	2703	3204	3366	3108.2
1450	80961	77968	77444	79366	73803	79260	79183	78007	74587	79653	78023.2	2867	3490	3044	2746	3826	2930	2979	2718	3212	3375	3118.7
1451	81244	78247	77740	79660	74093	79559	79468	78317	74863	79981	78317.2	2878	3506	3055	2754	3851	2941	2992	2729	3225	3391	3132.2
1452	81574	78525	78016	79961	74341	79866	79758	78600	75133	80253	78602.7	2889	3528	3068	2764	3862	2952	3003	2736	3237	3402	3144.1
1453	81864	78829	78338	80263	74646	80183	80058	78934	75419	80528	78906.2	2902	3545	3079	2776	3879	2963	3020	2747	3254	3420	3158.5
1454	82197	79101	78626	80578	74898	80484	80373	79200	75675	80803	79193.5	2914	3559	3093	2790	3889	2975	3029	2752	3264	3431	3169.6
1455	82532	79373	78895	80888	75162	80786	80665	79519	75927	81100	79484.7	2926	3576	3102	2797	3906	2985	3045	2762	3277	3442	3181.8
1456	82826	79659	79197	81177	75451	81093	80966	79833	76204	81410	79781.6	2934	3589	3113	2813	3920	2991	3056	2775	3290	3458	3193.9
1457	83117	79984	79484	81482	75704	81415	81281	80151	76514	81733	80086.5	2944	3601	3122	2821	3938	3002	3068	2781	3306	3475	3205.8
1458	83425	80276	79787	81777	75993	81757	81553	80445	76778	82065	80385.6	2959	3612	3131	2831	3952	3014	3081	2784	3314	3493	3217.1
1459	83741	80570	80089	82130	76255	82045	81857	80772	77040	82361	80686	2973	3622	3142	2846	3964	3030	3094	2800	3332	3501	3230.4
1460	84073	80876	80384	82430	76554	82361	82170	81103	77339	82651	80994.1	2990	3637	3155	2852	3970	3039	3105	2808	3345	3516	3241.7
1461	84427	81181	80702	82730	76845	82666	82471	81440	77600	82958	81302	3000	3646	3163	2864	3985	3053	3114	2818	3358	3528	3252.9
1462	84760	81457	81008	83061	77152	82980	82767	81776	77922	83251	81613.4	3010	3659	3175	2869	4002	3057	3126	2826	3374	3540	3263.8
1463	85077	81756	81315	83366	77429	83297	83093	82116	78228	83566	81924.3	3025	3666	3184	2881	4011	3068	3136	2833	3395	3556	3275.5
1464	85411	82050	81645	83663	77689	83566	83382	82419	78511	83859	82219.5	3033	3677	3196	2895	4022	3084	3144	2846	3408	3573	3287.8
1465	85752	82349	81967	83960	77969	83901	83707	82712	78757	84195	82526.9	3046	3696	3201	2910	4044	3094	3158	2852	3415	3587	3300.3
1466	86044	82647	82264	84279	78268	84218	84054	83035	79043	84536	82838.8	3056	3711	3217	2916	4053	3101	3170	2864	3430	3593	3311.1
1467	86324	82938	82588	84597	78582	84508	84382	83358	79331	84880	83148.8	3066	3719	3233	2926	4067	3111	3188	2882	3441	3605	3323.8
1468	86656	83257	82934	84888	78903	84792	84672	83661	79604	85178	83454.5	3075	3738	3242	2940	4081	3127	3204	2891	3456	3618	3337.2
1469	87018	83587	83233	85207	79210	85100	84945	83985	79931	85470	83768.6	3088	3752	3259	2953	4096	3140	3220	2902	3468	3636	3351.4
1470	87343	83889	83546	85519	79526	85393	85239	84316	80206	85817	84079.4	3097	3765	3277	2960	4108	3148	3236	2911	3482	3652	3363.6
1471	87666	84226	83859	85835	79830	85737	85544	84631	80484	86128	84394	3107	3784	3293	2973	4125	3164	3249	2924	3495	3670	3378.4
1472	88012	84511	84143	86180	80115	86042	85885	84939	80748	86470	84704.5	3118	3804	3309	2993	4146	3177	3266	2930	3514	3683	3394
1473	88343	84852	84466	86492	80416	86348	86205	85298	81071	86821	85031.2	3134	3827	3319	3004	4162	3188	3277	2937	3526	3696	3407
1474	88641	85174	84806	86802	80718	86679	86516	85608	81364	87174	85348.2	3147	3843	3331	3016	4180	3201	3287	2952	3546	3713	3421.6
1475	88942	85440	85163	87145	81014	86986	86828	85946	81682	87481	85662.7	3161	3854	3341	3029	4198	3213	3293	2966	3554	3732	3434.1
1476	89268	85774	85451	87483	81315	87283	87137	86288	81984	87814	85979.7	3176	3866	3350	3038	4212	3226	3301	2981	3569	3749	3446.8
1477	89617	86069	85784	87814	81579	87636	87440	86617	82297	88140	86299.3	3191	3875	3369	3052	4233	3243	3315	2990	3580	3756	3460.4
1478	89942	86381	86074	88171	81878	87964	87794	86952	82604	88489	86624.9	3201	3889	3387	3064	4245	3252	3322	3007	3588	3766	3472.1
1479	90283	86698	86395	88478	82162	88280	88083	87287	82892	88811	86936.9	3213	3902	3398	3076	4262	3264	3334	3019	3598	3782	3484.8
1480	90632	87001	86744	88804	82484	88604	88381	87591	83212	89182	87263.5	3225	3918	3412	3096	4273	3272	3342	3025	3616	3794	3497.3
1481	90976	87320	87104	89130	82796	88946	88701	87900	83525	89498	87589.6	3242	3938	3420	3106	4295	3292	3349	3033	3627	3806	3510.8
1482	91326	87668	87445	89466	83098	89267	88991	88224	83826	89869	87918	3255	3950	3432	3111	4312	3305	3364	3043	3635	3814	3522.1
1483	91659	87958	87770	89803	83369	89577	89332	88539	84118	90242	88236.7	3269	3975	3443	3126	4330	3316	3378	3059	3647	3823	3536.6
1484	92006	88310	88085	90134	83685	89931	89656	88858	84430	90603	88569.8	3280	3996	3449	3143	4345	3323	3389	3066	3669	3839	3549.9
1485	92361	88632	88438	90459	84015	90280	90007	89184	84761	90960	88909.7	3298	4011	3464	3159	4361	3338	3399	3073	3679	3853	3563.5
1486	92703	88955	88764	90781	84322	90616	90358	89543	85077	91293	89241.2	3310	4031	3469	3169	4371	3355	3412	3087	3694	3869	3576.7
1487	93026	89292	89079	91123	84616	90950	90707	89832	85370	91628	89562.3	3321	4042	3479	3182	4393	3370	3426	3097	3710	3878	3589.8
1488	93386	89633	89437	91445	84953	91278	91064	90168	85699	92000	89906.3	3337	4051	3490	3194	4414	3392	3434	3111	3724	3892	3603.9
1489	93714	89947	89768	91808	85306	91649	91412	90510	86026	92335	90247.5	3347	4069	3498	3211	4429	3403	3450	3126	3737	3902	3617.2
1490	94071	90273	90107	92154	85628	91980	91760	90830	86362	92702	90586.7	3361	4080	3513	3225	4452	3413	3465	3134	3755	3913	3631.1
1491	94428	90619	90449	92522	85950	92320	92072	91142	86705	93071	90927.8	3378	4099	3528	3238	4459	3433	3472	3148	3771	3928	3645.4
1492	94784	90942	90800	92859	86289	92652	92424	91505	87029	93434	91271.8	3394	4121	3543	3248	4483	3446	3482	3159	3784	3942	3660.2
1493	95133	91275	91114	93227	86592	92985	92775	91858	87350	93779	91608.8	3408	4133	3555	3261	4500	3461	3486	3165	3791	3953	3671.3
1494	95467	91611	91451	93564	86923	93338	93146	92203	87683	94128	91951.4	3424	4147	3559	3270	4519	3472	3496	3178	3801	3971	3683.7
1495	95790	91945	91775	93935	87249	93677	93494	92580	88028	94492	92296.5	3439	4165	3577	3282	4538	3482	3507	3196	3830	3985	3700.1
1496	96133	92325	92132	94294	87574	94040	93822	92937	88344	94840	92644.1	3460	4183	3591	3296	4552	3494	3517	3208	3851	4004	3715.6
1497	96513	92654	92461	94672	87918	94415	94156	93267	88682	95213	92995.1	3474	4201	3604	3309	4564	3511	3528	3222	3864	4016	3729.3
1498	96847	92963	92815	95034	88252	94766	94536	93643	88996	95592	93344.4	3483	4214	3620	3322	4581	3521	3540	3235	3872	4038	3742.6
1499	97199	93318	93158	95377	88547	95124	94888	93976	89335	95939	93686.1	3496	4227	3632	3339	4597	3538	3551	3246	3899	4054	3757.9
1500	97568	93660	93508	95717	88878	95458	95233	94325	89626	96297	94027	3512	4248	3657	3346	4612	3544	3562	3255	3913	4067	3771.6
1501	97946	93983	93836	96073	89221	95831	95572	94658	89955	96631	94370.6	3529	4258	3670	3357	4634	3561	3576	3264	3929	4087	3786.5
1502	98304	94322	94185	96454	89537	96195	95897	94981	90305	97001	94718.1	3544	4268	3686	3372	4648	3579	3584	3277	3938	4099	3799.5
1503	98641	94650	94521	96851	89864	96542	96222	95319	90645	97376	95063.1	3557	4282	3703	3390	4670	3583	3600	3290	3957	4107	3813.9
1504	98979	95032	94906	97238	90183	96925	96559	95681	90959	97722	95418.4	3570	4307	3723	3402	4690	3604	3614	3299	3972	4123	3830.4
1505	99331	95393	95251	97587	90546	97292	96937	96057	91309	98081	95778.4	3589	4326	3733	3410	4712	3623	3631	3311	3985	4138	3845.8
1506	99695	95778	95581	97997	90882	97630	97312	96425	91657	98445	96140.2	3600	4340	3744	3426	4725	3637	3643	3324	4004	4149	3859.2
1507	100081	96138	95915	98354	91240	97965	97649	96774	91972	98828	96491.6	3609	4351	3756	3438	4741	3646	3655	3337	4021	4163	3871.7
1508	100432	96489	96275	98720	91582	98306	98054	97162	92320	99223	96856.3	3622	4366	3776	3444	4757	3663	3674	3351	4031	4179	3886.3
1509	100802	96812	96628	99094	91906	98669	98411	97501	92694	99604	97212.1	3633	4383	3795	3460	4770	3682	3681	3367	4048	4188	3900.7
1510	101149	97171	96989	99499	92240	99012	98775	97854	93044	99960	97569.3	3642	4397	3811	3479	4789	3694	3694	3380	4064	4199	3914.9
1511	101515	97505	97341	99901	92611	99375	99133	98233	93388	100350	97935.2	3656	4411	3824	3489	4812	3711	3712	3397	4073	4218	3930.3
1512	101882	97880	97704	100271	92952	99752	99501	98615	93754	100738	98304.9	3671	4434	3841	3507	4830	3726	3729	3411	4092	4229	3947
[truncated: 487 more rows]

## Sheet: MD+CD+CF (c)
Control-sim																									p53 RNAi-sim
[truncated: 20,003 more rows]
