# Supplementary material for: Empirical single-cell tracking and cell-fate simulation reveal dual roles of p53 in tumor suppression
Source: eLife. 2022 Sep 20;11:e72498. doi: 10.7554/eLife.72498 (PMC9560164; doi:10.7554/eLife.72498)
Supplement: Figure 13—source data 1. — Data used in Figure 13. [file elife-72498-fig13-data1.xlsx]

## Sheet: Control+p53 RNAi (MNNG1.5)(b)
Control-sim (480 cells)+p53 RNAi-sim (20 cells) > MNNG1.5-sim+p53 RNAi-MNNG1.5-sim
	No of cells											No of cells
Time min x10	Control-sim	Control-sim	Control-sim	Control-sim	Control-sim	Control-sim	Control-sim	Control-sim	Control-sim	Control-sim	Average	p53 RNAi-sim	p53 RNAi-sim	p53 RNAi-sim	p53 RNAi-sim	p53 RNAi-sim	p53 RNAi-sim	p53 RNAi-sim	p53 RNAi-sim	p53 RNAi-sim	p53 RNAi-sim	Average
0	480	480	480	480	480	480	480	480	480	480	480	20	20	20	20	20	20	20	20	20	20	20
1	480	480	480	480	480	480	480	480	480	480	480	20	20	20	20	20	20	20	20	20	20	20
2	480	480	480	480	480	480	480	480	480	480	480	20	20	20	20	20	20	20	20	20	20	20
3	480	480	480	480	480	480	480	480	480	480	480	20	20	20	20	20	20	20	20	20	20	20
4	479	480	480	480	480	480	480	480	480	480	479.9	20	20	20	20	20	20	20	20	20	20	20
5	481	483	487	480	485	483	486	489	484	485	484.3	20	20	20	21	20	20	20	20	20	20	20.1
6	483	484	488	481	487	483	488	490	485	488	485.7	20	20	20	22	20	20	20	20	20	20	20.2
7	483	484	488	481	486	483	488	490	485	488	485.6	20	20	20	22	20	21	20	20	20	20	20.3
8	483	484	488	482	487	484	488	493	488	488	486.5	21	20	20	22	20	21	21	21	20	20	20.6
9	495	486	492	487	495	489	495	496	489	492	491.6	21	20	20	22	20	21	21	21	20	20	20.6
10	496	486	492	490	496	492	496	498	491	493	493	21	20	20	22	20	21	21	21	20	20	20.6
11	497	487	494	495	499	494	498	501	495	496	495.6	21	20	20	22	20	21	21	21	20	20	20.6
12	498	488	494	496	501	495	500	501	497	499	496.9	22	20	20	22	20	21	21	21	20	20	20.7
13	498	488	494	496	501	495	500	501	497	499	496.9	22	20	20	22	20	21	20	22	20	20	20.7
14	498	488	494	497	501	496	501	501	497	501	497.4	22	20	20	23	20	21	20	22	20	20	20.8
15	498	488	494	497	501	496	501	501	497	501	497.4	22	20	20	23	20	21	20	22	20	20	20.8
16	498	488	494	497	501	496	501	501	497	501	497.4	22	20	20	23	20	21	20	22	21	20	20.9
17	498	488	494	497	501	496	501	501	497	501	497.4	22	20	20	23	20	21	20	22	21	20	20.9
18	498	488	494	497	501	496	501	501	497	501	497.4	22	21	20	23	20	21	20	22	21	20	21
19	498	489	498	498	502	496	502	503	498	503	498.7	22	21	20	22	20	21	20	22	21	20	20.9
20	500	491	501	499	506	500	504	505	498	505	500.9	22	21	20	23	21	21	20	22	21	20	21.1
21	504	494	503	502	506	502	507	507	500	506	503.1	22	21	20	23	21	21	20	22	21	20	21.1
22	508	495	506	505	507	505	509	510	502	510	505.7	22	21	20	24	21	21	20	22	21	20	21.2
23	513	498	510	509	509	507	512	515	503	513	508.9	22	21	20	24	21	21	20	22	21	20	21.2
24	513	498	510	509	509	507	512	515	503	513	508.9	22	21	20	24	21	21	20	22	21	20	21.2
25	513	498	510	509	509	507	512	515	503	513	508.9	22	21	20	24	21	21	20	22	21	20	21.2
26	514	502	512	512	513	511	516	519	506	518	512.3	22	21	20	24	21	21	20	22	21	20	21.2
27	514	502	512	512	513	511	516	519	506	518	512.3	22	21	20	24	21	21	20	22	21	20	21.2
28	518	504	513	513	515	512	520	522	509	521	514.7	22	21	20	24	21	21	20	22	21	20	21.2
29	518	504	513	513	515	512	520	522	509	521	514.7	22	21	20	24	21	21	20	22	21	20	21.2
30	518	504	513	513	515	512	520	522	509	521	514.7	22	22	20	24	21	22	20	22	21	20	21.4
31	518	504	513	513	515	512	520	522	509	521	514.7	22	22	20	24	21	22	20	22	21	20	21.4
32	518	504	513	513	515	512	520	522	509	521	514.7	22	22	20	24	21	22	20	22	21	20	21.4
33	519	505	514	514	516	513	521	522	511	522	515.7	22	22	20	24	21	22	20	22	21	20	21.4
34	519	505	514	514	516	513	521	522	511	522	515.7	22	22	20	24	21	22	20	23	21	20	21.5
35	519	505	514	514	516	513	521	522	511	522	515.7	22	22	20	24	21	22	20	23	21	20	21.5
36	519	505	514	514	516	513	521	522	511	522	515.7	22	22	20	24	21	22	20	23	21	20	21.5
37	520	509	516	514	518	513	522	524	515	526	517.7	22	22	20	24	21	22	20	23	21	20	21.5
38	524	511	521	521	524	517	526	529	519	530	522.2	22	22	20	24	21	22	20	23	21	20	21.5
39	525	511	521	521	524	518	527	530	520	530	522.7	23	22	20	24	21	22	20	23	21	20	21.6
40	527	513	523	522	524	521	527	530	521	531	523.9	23	22	20	24	21	22	20	23	21	21	21.7
41	528	515	523	524	526	521	528	531	522	532	525	23	22	20	24	21	22	20	24	21	22	21.9
42	531	517	526	524	526	522	528	532	524	534	526.4	23	22	20	24	21	22	20	24	21	22	21.9
43	531	517	526	524	526	522	528	532	524	534	526.4	23	22	20	24	21	22	20	24	21	22	21.9
44	531	517	527	528	527	524	529	533	525	535	527.6	23	22	20	24	21	23	20	24	21	22	22
45	532	518	529	529	527	524	530	534	527	536	528.6	24	22	20	24	21	23	20	24	21	22	22.1
46	534	518	531	533	527	524	530	534	528	537	529.6	24	22	20	24	21	23	20	24	21	22	22.1
47	535	520	534	537	532	528	530	537	530	539	532.2	24	22	20	24	21	23	20	24	21	22	22.1
48	537	523	536	539	533	529	532	540	538	543	535	24	22	21	24	21	23	20	24	21	22	22.2
49	540	524	537	542	536	531	532	542	540	544	536.8	24	22	21	24	21	23	20	24	21	22	22.2
50	545	526	541	544	539	533	536	544	541	545	539.4	24	22	21	24	21	23	20	23	21	22	22.1
51	546	527	544	550	541	536	538	545	543	551	542.1	24	23	22	24	21	23	20	23	21	22	22.3
52	546	527	544	550	541	536	538	545	543	551	542.1	24	23	22	24	21	23	20	23	21	22	22.3
53	550	529	545	553	542	536	539	546	543	553	543.6	24	23	22	24	21	23	21	23	21	22	22.4
54	553	531	545	555	546	538	541	547	546	554	545.6	24	23	22	24	21	23	21	23	21	23	22.5
55	553	533	547	557	546	538	542	549	548	555	546.8	24	23	22	24	21	23	21	23	22	23	22.6
56	557	537	549	559	548	540	545	554	550	561	550	24	23	22	24	21	23	21	23	22	23	22.6
57	557	537	549	559	548	540	545	554	550	561	550	24	23	22	24	21	23	21	23	22	23	22.6
58	558	540	550	561	549	541	548	556	551	563	551.7	24	23	23	24	21	23	21	23	22	23	22.7
59	558	540	550	561	549	541	548	556	551	563	551.7	24	23	23	24	21	23	21	24	22	23	22.8
60	562	542	554	562	549	544	548	559	554	565	553.9	24	23	23	25	20	23	21	24	22	23	22.8
61	562	544	557	564	549	545	549	562	557	566	555.5	24	23	23	25	20	23	21	24	22	23	22.8
62	562	544	557	564	549	545	549	562	557	566	555.5	24	23	23	25	20	23	21	24	22	23	22.8
63	562	544	558	566	551	546	550	563	559	567	556.6	24	23	24	25	20	23	22	24	22	23	23
64	565	546	562	568	556	548	553	566	561	569	559.4	24	23	24	25	21	23	22	24	22	23	23.1
65	566	547	562	570	557	548	554	567	561	572	560.4	24	23	24	26	21	23	22	24	22	23	23.2
66	570	549	567	570	557	548	556	571	563	574	562.5	24	23	24	26	21	23	22	24	22	23	23.2
67	572	551	569	572	557	550	556	574	563	574	563.8	23	23	24	26	21	23	22	24	22	23	23.1
68	573	552	571	572	558	552	559	578	564	576	565.5	23	24	24	26	21	23	22	25	22	23	23.3
69	576	553	571	576	559	558	561	582	565	578	567.9	23	24	24	26	21	23	22	25	22	23	23.3
70	584	554	577	584	563	564	564	586	568	583	572.7	23	25	25	26	21	23	22	25	22	23	23.5
71	584	554	577	584	563	564	564	586	568	583	572.7	23	25	25	26	21	23	22	25	22	23	23.5
72	584	554	577	584	563	564	564	586	568	583	572.7	23	25	25	26	21	27	22	25	22	23	23.9
73	584	554	577	584	563	564	564	586	568	583	572.7	23	25	25	26	21	27	22	25	22	23	23.9
74	586	555	578	586	564	566	570	589	568	586	574.8	23	25	25	26	21	27	22	25	22	23	23.9
75	587	558	581	589	568	570	572	591	569	589	577.4	23	25	25	26	21	27	22	25	22	23	23.9
76	589	560	581	590	569	570	576	591	570	593	578.9	23	25	25	26	21	27	22	25	22	23	23.9
77	589	560	580	590	569	569	576	591	570	593	578.7	23	25	25	26	21	27	22	25	22	23	23.9
78	590	561	583	590	569	571	578	595	572	595	580.4	23	25	25	26	21	27	22	25	22	23	23.9
79	590	561	583	590	569	571	578	595	572	595	580.4	23	26	25	26	21	27	22	26	22	23	24.1
80	592	562	586	590	570	573	578	595	573	597	581.6	23	26	25	26	21	27	22	26	22	23	24.1
81	592	562	586	590	570	573	578	595	573	597	581.6	23	26	25	26	21	27	22	26	22	23	24.1
82	592	562	587	592	571	575	578	596	575	600	582.8	23	26	26	26	21	27	22	26	22	23	24.2
83	594	563	590	594	574	576	579	596	577	601	584.4	22	26	26	26	21	27	22	26	22	23	24.1
84	594	563	590	594	574	576	579	596	577	601	584.4	22	26	26	26	21	27	22	26	22	23	24.1
85	594	564	590	596	574	579	583	597	578	604	585.9	22	26	26	26	21	27	22	26	22	23	24.1
86	595	567	592	597	576	582	584	598	578	604	587.3	22	26	26	26	21	27	22	26	22	23	24.1
87	596	569	594	600	580	582	585	600	578	607	589.1	22	26	26	26	21	27	22	26	22	23	24.1
88	596	569	593	600	580	582	585	600	578	607	589	22	26	26	26	21	27	22	26	22	23	24.1
89	600	572	596	604	582	583	587	601	583	611	591.9	22	26	26	26	21	27	22	26	22	23	24.1
90	601	573	598	607	584	590	589	603	589	612	594.6	22	26	26	27	21	27	22	26	23	23	24.3
91	601	573	598	607	584	590	589	603	589	612	594.6	22	26	26	27	21	27	22	26	23	23	24.3
92	601	573	598	607	584	590	589	603	589	612	594.6	22	26	26	27	21	27	22	26	23	23	24.3
93	603	574	601	613	586	593	593	605	591	616	597.5	22	26	26	28	21	27	22	26	23	23	24.4
94	603	574	601	613	586	593	593	605	591	616	597.5	22	26	26	28	21	27	22	26	23	23	24.4
95	608	575	605	613	589	596	597	611	593	617	600.4	22	26	26	28	21	27	22	26	23	23	24.4
96	609	576	605	617	588	598	597	612	593	618	601.3	22	26	26	28	21	27	22	26	23	23	24.4
97	613	582	609	618	591	600	598	612	595	618	603.6	22	26	26	28	21	27	22	26	23	23	24.4
98	615	584	612	620	593	603	600	616	597	624	606.4	22	26	26	28	21	27	22	26	23	23	24.4
99	615	586	612	622	595	605	605	619	597	625	608.1	22	26	26	28	21	27	22	27	23	23	24.5
100	616	587	615	624	595	608	606	619	600	625	609.5	22	26	26	28	22	27	22	27	24	23	24.7
101	616	587	618	624	595	608	606	621	602	625	610.2	22	26	26	28	22	27	22	27	24	23	24.7
102	616	587	618	624	595	608	605	621	602	625	610.1	22	26	26	28	22	27	22	27	24	23	24.7
103	618	590	621	625	600	610	609	625	603	630	613.1	22	26	26	28	22	27	22	27	25	23	24.8
104	618	590	621	625	600	610	609	625	603	630	613.1	22	26	26	28	22	27	23	27	25	23	24.9
105	622	593	624	626	602	612	611	629	604	632	615.5	23	26	26	28	22	27	23	27	25	23	25
106	626	596	629	627	606	613	616	634	609	639	619.5	23	26	26	28	22	27	24	27	25	23	25.1
107	626	596	628	627	606	613	616	634	609	639	619.4	23	26	26	28	22	27	24	27	25	22	25
108	627	597	629	631	607	617	620	637	611	643	621.9	22	26	26	28	22	27	24	26	25	22	24.8
109	628	600	633	633	609	620	622	639	614	644	624.2	22	26	26	28	22	27	24	26	25	22	24.8
110	630	601	634	634	610	620	623	643	618	645	625.8	22	27	26	28	22	27	24	26	25	22	24.9
111	630	601	634	634	610	620	623	643	618	645	625.8	22	27	26	28	22	27	24	26	25	22	24.9
112	630	601	634	634	610	620	623	643	618	645	625.8	22	27	26	28	22	27	24	26	25	22	24.9
113	630	601	634	634	610	620	623	643	617	645	625.7	22	28	26	28	22	27	24	26	25	22	25
114	630	601	634	634	610	620	623	643	617	645	625.7	22	28	27	28	22	27	24	26	25	23	25.2
115	630	604	635	638	613	621	627	645	617	650	628	22	28	27	28	22	27	24	26	25	23	25.2
116	630	604	635	638	612	621	627	645	617	650	627.9	22	28	27	28	22	28	24	26	25	23	25.3
117	632	607	636	639	616	624	632	647	621	650	630.4	22	28	27	28	22	28	24	26	25	23	25.3
118	632	607	636	638	616	624	631	647	621	650	630.2	22	28	27	28	22	28	24	26	25	24	25.4
119	636	614	646	644	617	629	636	649	625	657	635.3	22	28	27	30	23	28	25	26	25	24	25.8
120	638	614	648	649	621	632	638	655	625	660	638	22	28	28	30	23	28	26	26	25	24	26
121	640	619	657	655	627	639	645	663	632	668	644.5	22	28	28	30	23	28	26	26	26	24	26.1
122	641	619	657	655	628	640	647	663	634	668	645.2	22	28	28	30	23	28	26	26	26	24	26.1
123	641	622	659	655	630	641	648	666	634	670	646.6	24	29	28	30	23	29	26	26	26	24	26.5
124	642	622	660	657	634	643	649	667	635	671	648	24	29	28	31	23	29	26	26	26	24	26.6
125	645	623	660	659	635	646	652	675	637	672	650.4	24	30	28	32	24	29	26	26	26	24	26.9
126	649	624	662	660	635	650	653	676	640	673	652.2	24	30	28	32	24	29	26	26	26	24	26.9
127	651	626	664	661	636	652	656	678	643	674	654.1	24	30	28	32	24	29	26	26	26	24	26.9
128	652	628	664	662	639	654	659	679	648	677	656.2	24	31	28	32	24	29	26	26	26	24	27
129	659	628	666	664	641	657	660	681	650	681	658.7	25	31	28	32	24	31	26	26	26	24	27.3
130	660	633	671	666	641	658	660	683	653	682	660.7	25	31	28	32	25	31	26	27	26	24	27.5
131	662	636	672	666	647	660	662	683	655	685	662.8	25	31	28	32	25	31	26	27	26	25	27.6
132	667	639	676	671	652	662	666	686	661	694	667.4	26	31	28	32	25	31	26	27	26	25	27.7
133	671	641	679	676	659	667	670	687	665	700	671.5	26	31	28	32	25	31	26	27	27	25	27.8
134	673	642	680	679	661	671	672	688	668	701	673.5	26	31	28	32	25	32	26	27	27	25	27.9
135	675	649	683	683	667	678	678	693	671	706	678.3	26	31	28	32	25	32	26	27	27	25	27.9
136	677	652	686	687	669	678	679	698	674	707	680.7	26	31	29	32	25	32	27	27	27	25	28.1
137	681	654	688	689	672	682	683	697	676	708	683	27	31	29	32	25	32	27	27	27	25	28.2
138	681	654	688	689	672	682	683	697	676	708	683	27	31	30	32	25	32	27	27	27	25	28.3
139	682	655	689	690	673	683	688	697	678	710	684.5	27	31	30	32	25	32	27	27	27	25	28.3
140	685	657	689	691	677	683	692	702	681	712	686.9	27	31	30	32	25	32	27	27	27	25	28.3
141	686	660	691	692	677	683	695	702	681	713	688	27	31	30	32	25	32	27	27	27	25	28.3
142	689	661	695	695	680	684	698	703	683	718	690.6	27	31	30	32	25	33	27	27	28	25	28.5
143	693	666	696	698	683	691	702	704	686	719	693.8	27	31	30	32	25	33	27	27	28	25	28.5
144	698	671	698	700	686	698	706	708	691	719	697.5	27	31	30	32	25	33	28	28	28	25	28.7
145	699	671	698	701	686	698	706	710	691	719	697.9	27	31	30	32	25	33	28	28	28	25	28.7
146	699	673	700	703	687	700	707	710	693	719	699.1	27	31	31	32	25	33	28	28	28	25	28.8
147	700	673	700	703	687	700	708	709	693	719	699.2	27	31	31	32	25	32	28	28	28	25	28.7
148	701	674	700	704	689	701	710	713	694	721	700.7	27	31	31	32	25	32	28	28	28	25	28.7
149	703	674	700	705	691	703	711	714	695	724	702	27	31	31	32	25	32	28	28	27	26	28.7
150	704	674	700	705	693	703	711	715	696	725	702.6	27	32	31	32	25	32	28	28	27	26	28.8
151	704	675	701	706	696	702	712	717	699	726	703.8	27	32	31	32	25	32	28	28	27	26	28.8
152	705	677	705	709	697	704	714	717	700	728	705.6	28	32	31	32	25	32	29	28	27	26	29
153	706	678	706	711	698	706	717	724	702	733	708.1	29	32	31	32	25	32	29	28	27	27	29.2
154	708	681	713	713	709	710	722	725	707	735	712.3	30	33	32	33	25	32	29	28	27	27	29.6
155	708	685	714	714	712	715	726	725	707	738	714.4	30	33	32	33	25	32	29	28	27	27	29.6
156	712	694	717	721	716	718	728	734	713	742	719.5	31	33	32	33	25	32	29	28	27	27	29.7
157	718	698	720	728	720	722	733	736	719	745	723.9	31	33	32	33	25	32	29	28	27	27	29.7
158	718	698	720	729	720	722	733	736	719	745	724	31	33	32	33	25	32	29	28	27	27	29.7
159	719	702	725	732	722	725	737	737	722	746	726.7	31	33	32	33	25	32	29	28	27	27	29.7
160	724	704	725	733	724	726	742	739	724	749	729	31	33	32	33	25	32	29	28	27	27	29.7
161	725	706	730	735	728	731	746	745	726	752	732.4	31	33	32	33	25	32	29	28	29	27	29.9
162	729	719	738	739	733	735	752	751	727	753	737.6	31	33	32	35	25	32	29	28	29	28	30.2
163	731	719	739	739	737	736	753	754	730	754	739.2	31	33	32	35	25	32	29	28	29	28	30.2
164	732	721	739	739	738	737	753	755	731	754	739.9	31	33	32	35	25	32	29	28	29	28	30.2
165	733	722	742	744	739	739	754	758	732	757	742	31	33	32	35	25	32	30	29	29	29	30.5
166	734	722	743	744	741	741	754	759	732	758	742.8	31	34	32	35	25	32	30	29	29	29	30.6
167	737	723	745	747	742	743	755	759	734	760	744.5	31	35	32	35	25	33	30	29	29	29	30.8
168	745	727	752	750	748	750	759	762	741	764	749.8	31	35	32	35	26	33	30	29	29	29	30.9
169	747	729	753	750	748	753	763	765	743	765	751.6	32	35	33	36	26	33	30	29	30	29	31.3
170	748	730	753	752	750	753	764	767	743	765	752.5	32	35	34	36	26	34	31	29	31	30	31.8
171	749	731	753	754	750	754	765	768	743	766	753.3	32	35	34	36	26	34	31	29	31	30	31.8
172	751	738	759	758	755	759	769	776	751	771	758.7	32	35	34	36	27	34	31	29	31	30	31.9
173	752	737	760	759	756	759	770	777	752	772	759.4	33	35	34	36	27	34	31	29	31	30	32
174	752	739	761	759	759	759	770	777	754	772	760.2	33	35	34	37	27	34	32	30	31	30	32.3
175	753	739	763	759	759	761	770	777	754	772	760.7	33	36	34	37	27	34	32	30	31	30	32.4
176	754	738	763	760	760	762	770	776	754	773	761	33	36	33	38	27	34	32	31	31	30	32.5
177	756	739	766	763	761	763	773	777	756	773	762.7	34	36	33	38	27	34	32	31	31	31	32.7
178	762	740	772	766	762	767	778	780	757	775	765.9	34	36	33	38	27	35	32	33	31	31	33
179	763	740	772	766	768	770	781	783	760	778	768.1	34	36	33	38	27	35	32	33	32	31	33.1
180	764	743	772	768	769	773	782	783	763	780	769.7	34	37	33	38	27	36	32	33	32	31	33.3
181	767	744	776	771	771	776	783	786	765	781	772	34	37	33	38	28	36	34	33	32	31	33.6
182	768	743	777	772	774	779	786	789	766	781	773.5	34	37	33	38	28	37	34	33	32	31	33.7
183	771	750	781	778	785	787	793	796	773	790	780.4	34	37	33	38	29	37	34	33	32	31	33.8
184	772	753	784	782	787	789	795	796	774	794	782.6	34	37	33	38	29	38	34	34	32	32	34.1
185	775	755	789	782	794	791	797	797	778	796	785.4	34	37	33	38	29	38	34	34	32	33	34.2
186	779	755	793	784	795	795	801	800	781	797	788	34	37	33	38	29	38	34	34	32	33	34.2
187	785	757	795	790	799	798	807	803	784	801	791.9	34	37	33	38	29	38	34	34	32	33	34.2
188	787	759	797	791	799	798	807	806	784	803	793.1	34	37	33	38	29	38	34	34	32	33	34.2
189	794	763	798	791	804	802	811	808	787	805	796.3	34	37	33	39	29	38	34	35	32	33	34.4
190	799	766	803	794	804	802	814	815	790	811	799.8	34	37	33	40	29	38	34	35	32	33	34.5
191	800	770	805	795	807	805	817	815	792	814	802	34	37	34	40	29	38	34	35	32	33	34.6
192	803	771	807	796	807	807	818	816	792	817	803.4	34	37	34	40	29	38	34	35	32	33	34.6
193	805	773	809	797	807	807	820	816	794	818	804.6	34	37	34	40	29	38	34	35	32	33	34.6
194	805	774	809	798	807	807	820	817	797	819	805.3	34	37	34	41	29	38	34	35	32	33	34.7
195	809	778	812	799	807	809	827	818	800	823	808.2	34	37	34	41	29	38	34	35	32	33	34.7
196	815	782	815	802	810	810	833	820	804	832	812.3	34	37	34	42	29	38	34	35	32	33	34.8
197	816	784	816	805	811	812	835	823	807	834	814.3	34	37	34	42	29	38	34	35	32	33	34.8
198	820	784	819	807	813	813	836	827	808	835	816.2	34	37	34	42	29	38	34	35	32	33	34.8
199	826	788	822	811	816	817	840	830	812	835	819.7	34	37	34	42	29	38	34	35	32	33	34.8
200	830	790	824	812	818	818	840	830	812	836	821	34	37	34	42	29	38	34	35	32	33	34.8
201	832	791	826	814	819	819	841	831	813	837	822.3	34	37	34	42	29	38	34	35	32	33	34.8
202	838	795	827	820	820	819	843	836	816	839	825.3	34	37	34	42	29	38	34	35	32	33	34.8
203	838	794	828	822	821	819	844	838	819	840	826.3	34	37	34	42	29	38	34	35	32	33	34.8
204	838	795	831	827	824	823	853	840	821	843	829.5	34	37	34	42	29	38	34	35	32	33	34.8
205	843	796	829	830	825	824	855	842	821	845	831	34	37	34	42	29	38	34	35	32	33	34.8
206	846	797	834	836	829	827	858	848	826	846	834.7	34	37	34	42	30	38	34	35	32	33	34.9
207	851	801	835	840	834	827	860	850	827	850	837.5	34	37	34	42	30	38	34	35	32	34	35
208	851	801	837	843	834	830	862	853	831	855	839.7	34	37	34	42	30	38	34	35	32	34	35
209	855	801	839	845	837	831	864	856	833	856	841.7	34	37	34	42	30	39	34	35	32	34	35.1
210	859	806	843	848	840	832	867	861	836	863	845.5	34	37	34	42	30	40	34	35	32	34	35.2
211	861	807	843	849	842	834	867	862	836	865	846.6	34	38	34	42	30	40	34	35	32	34	35.3
212	862	808	844	851	846	835	870	864	837	867	848.4	35	38	34	42	30	40	34	35	32	34	35.4
213	866	811	848	855	847	838	871	866	838	867	850.7	35	38	33	42	30	40	34	36	32	34	35.4
214	869	811	850	858	848	840	872	868	843	868	852.7	35	38	33	42	30	40	34	35	32	34	35.3
215	872	813	851	860	848	841	873	869	844	869	854	35	38	33	42	30	40	34	35	32	34	35.3
216	876	816	854	861	849	844	876	872	845	871	856.4	35	38	33	43	31	40	34	35	34	35	35.8
217	879	820	857	864	853	848	878	875	849	876	859.9	35	38	33	43	31	40	34	35	34	35	35.8
218	884	824	858	865	854	849	879	880	852	879	862.4	35	38	33	43	31	40	34	35	34	35	35.8
219	888	828	863	868	863	853	887	882	854	881	866.7	35	38	33	43	31	40	34	35	34	35	35.8
220	889	832	865	873	866	855	889	885	859	884	869.7	35	38	33	43	31	40	34	35	35	35	35.9
221	889	833	866	875	869	856	891	887	862	888	871.6	35	38	33	43	31	40	34	35	35	35	35.9
222	891	836	867	879	870	858	891	889	862	888	873.1	35	38	33	43	31	40	34	35	35	35	35.9
223	896	837	870	881	876	863	894	892	864	892	876.5	35	38	33	43	31	40	34	35	34	35	35.8
224	901	843	874	885	882	866	897	897	867	898	881	35	38	33	43	32	40	35	35	34	35	36
225	903	845	878	889	882	867	900	901	870	900	883.5	35	38	33	44	32	40	35	35	34	35	36.1
226	904	850	880	891	886	871	900	906	875	904	886.7	35	38	33	44	32	40	35	35	34	35	36.1
227	909	852	885	891	887	875	902	909	880	911	890.1	35	38	33	44	33	40	35	35	35	35	36.3
228	915	855	892	897	893	880	904	921	883	915	895.5	36	39	33	44	33	40	35	35	34	35	36.4
229	918	858	894	904	896	883	906	923	885	919	898.6	36	39	34	44	33	40	35	35	34	35	36.5
230	922	858	895	907	898	884	907	925	890	924	901	36	40	34	44	33	40	36	35	34	35	36.7
231	926	860	900	910	900	887	910	927	891	927	903.8	36	40	34	44	33	40	36	35	34	35	36.7
232	929	861	903	913	901	887	912	929	896	929	906	36	40	34	44	33	39	36	35	34	35	36.6
233	932	861	906	915	904	888	914	930	899	931	908	37	40	34	44	33	39	36	35	34	34	36.6
234	938	866	906	920	906	893	916	934	899	936	911.4	37	40	34	44	33	39	36	35	34	35	36.7
235	940	867	908	924	907	896	917	939	902	940	914	37	40	34	44	33	39	36	35	34	35	36.7
236	941	873	912	925	913	901	925	945	908	942	918.5	37	40	36	44	33	39	36	35	34	35	36.9
237	943	875	915	932	916	902	928	946	909	945	921.1	37	40	36	44	33	38	36	35	34	35	36.8
238	947	877	917	933	917	908	932	950	913	947	924.1	37	41	36	44	33	38	36	35	34	35	36.9
239	951	880	923	940	920	910	935	952	917	950	927.8	37	41	36	44	33	38	37	35	34	35	37
240	952	881	923	941	922	911	936	954	919	958	929.7	37	41	36	44	33	38	38	35	34	35	37.1
241	954	885	925	943	922	913	939	957	920	961	931.9	37	41	37	45	33	38	38	35	34	35	37.3
242	955	888	931	945	926	913	942	961	920	963	934.4	37	41	37	46	33	38	38	35	34	35	37.4
243	955	892	931	947	927	916	943	961	921	969	936.2	37	41	37	46	33	38	38	35	34	35	37.4
244	959	896	935	951	932	921	945	968	926	975	940.8	37	41	37	46	33	38	38	35	34	35	37.4
245	961	897	938	955	935	926	950	971	931	978	944.2	37	41	37	46	33	38	39	36	34	35	37.6
246	962	898	941	957	940	932	952	972	933	979	946.6	37	42	37	46	33	38	39	37	34	35	37.8
247	966	898	943	960	940	933	954	973	933	983	948.3	37	44	37	46	33	38	39	37	34	35	38
248	968	899	943	964	942	936	956	975	936	986	950.5	37	44	37	46	33	38	39	37	34	35	38
249	970	899	943	965	945	939	957	979	941	988	952.6	37	44	37	46	33	38	39	37	34	35	38
250	974	902	948	968	947	945	962	979	942	992	955.9	37	44	37	47	33	38	39	37	34	35	38.1
251	977	905	952	972	951	947	967	982	944	993	959	37	44	37	48	33	38	39	37	34	35	38.2
252	979	909	953	975	956	948	971	985	947	996	961.9	37	43	37	48	34	38	39	37	34	35	38.2
253	983	910	957	983	958	951	973	988	951	1001	965.5	37	43	37	48	34	39	39	37	34	35	38.3
254	986	920	962	987	965	956	975	995	956	1006	970.8	37	43	37	48	34	40	39	39	34	35	38.6
255	991	922	969	995	970	958	980	996	958	1009	974.8	37	44	37	48	34	40	39	39	34	35	38.7
256	992	926	972	997	972	960	981	998	959	1014	977.1	37	44	37	49	34	40	39	39	34	35	38.8
257	993	936	981	1004	979	962	985	1002	970	1018	983	37	44	37	49	34	40	39	40	34	35	38.9
258	993	937	986	1010	983	967	988	1005	972	1026	986.7	38	44	37	49	34	40	39	40	34	35	39
259	993	941	990	1017	985	968	992	1007	975	1032	990	38	46	37	50	34	40	39	40	35	35	39.4
260	1000	950	1001	1024	993	974	996	1011	981	1039	996.9	38	47	37	50	34	41	39	41	36	35	39.8
261	1005	950	1007	1030	994	973	1001	1011	983	1043	999.7	38	46	37	51	34	41	39	41	36	35	39.8
262	1006	952	1011	1033	998	975	1006	1013	990	1046	1003	39	46	37	51	34	41	39	41	36	35	39.9
263	1009	952	1014	1036	1002	978	1011	1018	991	1052	1006.3	39	46	37	51	34	41	39	41	36	35	39.9
264	1011	955	1014	1036	1005	981	1014	1024	992	1057	1008.9	39	46	37	51	34	41	40	41	36	36	40.1
265	1011	957	1020	1037	1005	987	1016	1026	997	1058	1011.4	39	46	37	51	34	41	40	42	36	36	40.2
266	1013	959	1025	1041	1008	988	1021	1029	999	1062	1014.5	39	46	37	51	34	42	40	42	36	37	40.4
267	1017	963	1026	1042	1012	990	1022	1030	1004	1070	1017.6	39	46	37	51	34	42	40	42	37	37	40.5
268	1018	970	1030	1043	1012	992	1025	1031	1012	1076	1020.9	39	46	37	51	34	42	40	42	37	37	40.5
269	1019	975	1032	1044	1014	996	1028	1035	1016	1083	1024.2	39	46	37	51	34	42	40	41	37	37	40.4
270	1021	979	1036	1050	1016	998	1030	1036	1019	1085	1027	39	46	37	51	35	42	40	41	37	37	40.5
271	1026	980	1041	1056	1019	1002	1031	1040	1021	1089	1030.5	39	46	37	51	35	42	41	42	37	37	40.7
272	1028	983	1046	1060	1022	1006	1037	1044	1026	1089	1034.1	39	47	37	51	35	42	41	42	37	37	40.8
273	1030	985	1048	1063	1024	1010	1040	1050	1031	1091	1037.2	40	48	37	51	35	42	41	42	38	37	41.1
274	1031	987	1050	1066	1025	1014	1043	1053	1035	1097	1040.1	40	48	37	51	35	42	41	43	38	37	41.2
275	1034	988	1052	1071	1028	1022	1049	1056	1038	1099	1043.7	40	48	37	51	35	42	41	43	38	37	41.2
276	1037	989	1054	1072	1032	1024	1051	1059	1037	1102	1045.7	40	48	37	52	35	42	43	43	38	37	41.5
277	1037	988	1058	1074	1036	1029	1051	1059	1038	1105	1047.5	40	49	37	52	35	42	43	43	38	37	41.6
278	1039	994	1060	1075	1038	1031	1054	1060	1044	1111	1050.6	40	49	37	53	35	43	43	43	38	37	41.8
279	1044	997	1063	1078	1040	1037	1057	1065	1049	1112	1054.2	40	49	37	53	35	43	43	43	38	37	41.8
280	1048	999	1064	1080	1041	1041	1063	1068	1049	1117	1057	40	49	37	53	35	43	43	43	38	37	41.8
281	1050	1003	1067	1084	1045	1044	1067	1077	1052	1120	1060.9	41	49	38	54	35	43	44	42	38	38	42.2
282	1054	1007	1070	1089	1048	1048	1071	1078	1054	1124	1064.3	42	49	38	54	35	43	44	42	38	38	42.3
283	1057	1010	1075	1094	1051	1051	1074	1083	1058	1126	1067.9	42	49	39	54	36	43	44	42	38	38	42.5
284	1063	1013	1080	1095	1057	1052	1078	1086	1061	1127	1071.2	42	49	39	54	36	43	44	42	38	38	42.5
285	1064	1014	1084	1101	1059	1053	1083	1089	1066	1130	1074.3	43	49	39	54	36	43	44	42	38	38	42.6
286	1071	1022	1087	1105	1061	1056	1089	1091	1072	1135	1078.9	43	50	39	55	36	43	44	41	38	38	42.7
287	1075	1024	1093	1107	1063	1059	1089	1094	1077	1140	1082.1	43	51	39	55	36	43	44	41	38	38	42.8
288	1079	1030	1100	1111	1066	1064	1090	1098	1080	1143	1086.1	43	51	40	55	37	43	45	41	38	39	43.2
289	1083	1038	1104	1117	1076	1065	1094	1106	1085	1147	1091.5	43	51	40	55	37	45	45	41	38	39	43.4
290	1086	1039	1108	1119	1080	1065	1099	1110	1086	1151	1094.3	44	51	41	55	37	45	45	40	38	39	43.5
291	1089	1041	1111	1122	1083	1071	1104	1115	1089	1159	1098.4	45	51	41	55	37	45	45	40	39	39	43.7
292	1091	1048	1116	1125	1087	1074	1111	1121	1097	1164	1103.4	45	51	41	55	37	45	46	41	39	39	43.9
293	1096	1052	1119	1128	1091	1076	1113	1126	1100	1169	1107	45	51	41	55	37	46	46	41	39	39	44
294	1102	1054	1122	1131	1093	1078	1113	1133	1101	1172	1109.9	45	52	41	56	37	46	46	41	39	39	44.2
295	1111	1058	1126	1140	1099	1084	1117	1139	1104	1176	1115.4	45	52	41	56	37	46	46	41	39	39	44.2
296	1112	1059	1128	1145	1100	1087	1118	1144	1106	1179	1117.8	46	52	41	56	37	46	46	40	39	39	44.2
297	1113	1062	1131	1150	1103	1090	1119	1147	1106	1182	1120.3	46	52	41	56	37	46	46	40	39	39	44.2
298	1117	1068	1137	1154	1108	1095	1126	1152	1112	1185	1125.4	46	53	41	56	37	45	46	40	39	39	44.2
299	1119	1068	1144	1156	1111	1097	1134	1153	1116	1193	1129.1	46	53	41	56	37	46	46	41	39	39	44.4
300	1121	1072	1149	1164	1114	1097	1146	1156	1117	1194	1133	46	53	41	57	37	47	46	41	39	39	44.6
301	1126	1076	1153	1166	1118	1101	1148	1161	1120	1198	1136.7	47	54	41	57	37	47	47	41	39	41	45.1
302	1131	1082	1154	1171	1123	1104	1149	1168	1125	1207	1141.4	47	54	41	57	37	47	47	41	39	41	45.1
303	1135	1086	1158	1175	1129	1108	1150	1174	1128	1211	1145.4	47	54	42	57	37	47	47	41	39	42	45.3
304	1140	1092	1162	1181	1134	1112	1155	1182	1132	1219	1150.9	47	55	42	57	37	47	48	41	39	42	45.5
305	1144	1097	1165	1186	1139	1117	1159	1188	1135	1222	1155.2	47	55	42	57	39	48	47	41	39	43	45.8
306	1147	1105	1168	1191	1149	1119	1163	1192	1137	1224	1159.5	47	55	42	57	39	48	47	41	39	43	45.8
307	1153	1111	1168	1192	1153	1125	1167	1195	1141	1230	1163.5	47	55	42	57	40	48	48	42	39	44	46.2
308	1159	1119	1174	1194	1157	1132	1168	1203	1145	1233	1168.4	47	55	42	57	41	49	48	43	39	44	46.5
309	1164	1122	1177	1196	1157	1135	1172	1204	1150	1235	1171.2	47	55	41	57	41	49	48	43	39	43	46.3
310	1167	1129	1179	1199	1162	1142	1184	1207	1151	1235	1175.5	47	55	41	57	41	49	48	43	41	43	46.5
311	1169	1135	1180	1209	1166	1146	1186	1209	1155	1244	1179.9	47	56	41	57	41	49	48	43	41	44	46.7
312	1172	1140	1185	1216	1173	1151	1190	1211	1161	1248	1184.7	47	56	42	57	41	49	48	43	41	46	47
313	1174	1147	1189	1217	1173	1153	1190	1221	1167	1252	1188.3	47	58	43	58	41	49	48	43	41	47	47.5
314	1176	1150	1194	1221	1181	1157	1196	1224	1174	1258	1193.1	47	57	44	58	41	49	48	44	41	47	47.6
315	1179	1152	1196	1226	1183	1161	1205	1230	1177	1260	1196.9	48	59	44	58	41	49	48	44	41	47	47.9
316	1184	1152	1203	1228	1188	1166	1210	1232	1180	1265	1200.8	49	59	44	58	41	49	48	44	42	47	48.1
317	1187	1153	1212	1230	1189	1171	1214	1235	1183	1268	1204.2	49	59	44	58	41	49	49	44	42	47	48.2
318	1189	1157	1220	1233	1193	1182	1223	1238	1188	1271	1209.4	49	59	44	58	41	49	50	44	42	47	48.3
319	1191	1165	1225	1237	1199	1189	1229	1240	1192	1275	1214.2	49	59	44	58	41	49	50	44	42	47	48.3
320	1197	1169	1227	1243	1206	1197	1232	1248	1196	1279	1219.4	49	59	44	58	41	49	50	44	42	47	48.3
321	1205	1171	1238	1250	1212	1204	1240	1256	1201	1287	1226.4	50	59	44	59	41	49	50	44	42	48	48.6
322	1206	1176	1242	1252	1213	1211	1242	1260	1204	1291	1229.7	51	59	44	61	41	49	50	44	42	48	48.9
323	1211	1179	1245	1258	1216	1216	1244	1263	1210	1294	1233.6	53	59	44	61	41	49	51	44	42	48	49.2
324	1215	1185	1246	1263	1221	1221	1251	1269	1212	1295	1237.8	53	59	44	62	41	50	51	45	42	48	49.5
325	1222	1189	1248	1268	1229	1227	1255	1270	1214	1303	1242.5	53	59	44	62	41	50	51	45	42	48	49.5
326	1232	1194	1254	1273	1234	1238	1258	1282	1220	1307	1249.2	53	59	46	62	41	51	51	45	42	48	49.8
327	1241	1205	1261	1276	1239	1242	1262	1286	1223	1311	1254.6	53	59	47	63	41	51	52	45	42	49	50.2
328	1248	1210	1264	1279	1242	1244	1268	1291	1226	1316	1258.8	53	59	48	63	41	51	52	45	42	49	50.3
329	1250	1211	1268	1284	1247	1247	1272	1294	1232	1319	1262.4	53	59	48	63	41	52	54	45	42	49	50.6
330	1253	1211	1274	1289	1253	1259	1280	1301	1237	1322	1267.9	54	59	49	63	41	52	54	45	42	49	50.8
331	1258	1214	1275	1292	1254	1266	1287	1306	1245	1329	1272.6	54	59	49	62	41	52	56	45	42	49	50.9
332	1259	1217	1279	1297	1258	1270	1291	1308	1246	1334	1275.9	55	59	49	62	42	52	56	45	42	49	51.1
333	1265	1220	1281	1299	1263	1272	1293	1315	1249	1339	1279.6	56	59	49	63	42	54	56	46	42	50	51.7
334	1270	1226	1286	1303	1270	1278	1297	1319	1256	1341	1284.6	57	59	50	64	42	54	56	46	42	50	52
335	1277	1233	1289	1313	1275	1286	1298	1321	1258	1342	1289.2	58	60	50	64	42	54	57	46	42	50	52.3
336	1280	1236	1298	1315	1282	1290	1306	1325	1266	1343	1294.1	58	60	50	63	42	54	57	46	42	51	52.3
337	1285	1240	1300	1325	1290	1292	1313	1329	1271	1350	1299.5	58	60	51	63	42	54	57	46	43	51	52.5
338	1290	1248	1305	1328	1294	1296	1316	1335	1277	1354	1304.3	58	60	51	63	42	54	57	45	43	51	52.4
339	1295	1254	1309	1330	1302	1298	1322	1340	1281	1356	1308.7	58	60	51	63	43	54	57	45	43	51	52.5
340	1300	1256	1311	1341	1307	1301	1328	1346	1287	1361	1313.8	58	60	52	63	44	55	58	45	43	51	52.9
341	1305	1259	1313	1343	1312	1309	1332	1348	1291	1366	1317.8	58	60	52	65	44	55	59	45	43	51	53.2
342	1308	1263	1322	1345	1319	1312	1338	1352	1291	1373	1322.3	58	61	52	65	44	55	59	44	44	51	53.3
343	1313	1268	1327	1344	1323	1315	1346	1356	1293	1382	1326.7	57	62	52	65	44	55	59	44	44	51	53.3
344	1317	1272	1334	1354	1329	1321	1350	1362	1301	1388	1332.8	57	62	52	66	44	55	60	45	45	51	53.7
345	1323	1274	1344	1361	1330	1325	1354	1366	1307	1391	1337.5	57	62	52	67	45	55	60	47	45	51	54.1
346	1326	1278	1350	1369	1336	1332	1360	1374	1310	1399	1343.4	57	62	53	67	45	57	60	47	45	51	54.4
347	1329	1285	1351	1370	1343	1339	1363	1380	1315	1403	1347.8	57	62	54	67	45	59	60	47	46	51	54.8
348	1335	1290	1353	1377	1346	1345	1366	1385	1323	1408	1352.8	57	63	54	68	45	60	60	47	48	51	55.3
349	1341	1291	1358	1383	1353	1350	1372	1389	1330	1411	1357.8	57	63	55	69	47	60	60	47	48	53	55.9
350	1348	1296	1367	1386	1356	1360	1379	1395	1337	1416	1364	57	63	55	69	47	60	60	47	48	53	55.9
351	1354	1304	1372	1392	1355	1363	1384	1405	1344	1422	1369.5	57	63	55	69	47	62	60	47	48	53	56.1
352	1356	1310	1375	1399	1360	1368	1388	1410	1352	1428	1374.6	57	63	55	71	47	63	60	47	48	53	56.4
353	1361	1316	1379	1403	1364	1373	1393	1417	1353	1432	1379.1	57	63	56	71	47	63	60	47	48	53	56.5
354	1366	1324	1382	1406	1371	1381	1404	1421	1356	1438	1384.9	57	63	56	71	47	63	60	48	48	53	56.6
355	1367	1328	1388	1409	1377	1383	1413	1426	1361	1443	1389.5	57	63	57	71	47	63	61	47	48	53	56.7
356	1372	1329	1390	1411	1381	1388	1416	1428	1366	1447	1392.8	57	63	57	71	47	63	61	47	48	53	56.7
357	1376	1334	1396	1417	1382	1392	1421	1433	1372	1450	1397.3	58	63	57	71	48	65	61	47	48	53	57.1
358	1380	1339	1400	1422	1388	1402	1426	1437	1379	1454	1402.7	58	63	57	71	48	66	62	47	48	54	57.4
359	1386	1342	1403	1428	1392	1404	1429	1444	1386	1457	1407.1	58	63	58	71	48	66	62	46	48	54	57.4
360	1395	1349	1410	1436	1400	1416	1431	1453	1391	1462	1414.3	58	62	58	71	48	65	62	46	48	54	57.2
361	1398	1351	1414	1442	1406	1421	1435	1457	1397	1469	1419	58	62	58	71	48	65	62	46	48	55	57.3
362	1399	1356	1416	1445	1413	1426	1441	1465	1406	1475	1424.2	58	62	58	71	48	65	62	47	48	56	57.5
363	1403	1362	1421	1447	1414	1433	1448	1470	1411	1482	1429.1	58	62	58	71	48	65	62	49	48	56	57.7
364	1411	1368	1429	1453	1420	1438	1454	1473	1412	1486	1434.4	58	62	58	71	49	65	62	50	48	56	57.9
365	1421	1374	1433	1465	1426	1444	1460	1476	1417	1489	1440.5	58	62	58	71	49	65	62	50	48	56	57.9
366	1425	1376	1438	1468	1433	1445	1466	1486	1420	1496	1445.3	60	62	58	71	49	66	62	50	48	56	58.2
367	1428	1382	1444	1472	1437	1447	1470	1491	1424	1501	1449.6	60	62	58	71	49	66	62	50	48	56	58.2
368	1431	1385	1448	1476	1445	1453	1476	1498	1431	1502	1454.5	60	62	58	71	49	66	63	51	49	56	58.5
369	1437	1389	1450	1480	1452	1455	1482	1502	1437	1506	1459	60	62	58	71	49	65	63	52	49	57	58.6
370	1444	1392	1451	1483	1456	1456	1485	1508	1447	1510	1463.2	60	62	58	71	49	65	63	52	49	57	58.6
371	1451	1394	1455	1491	1458	1460	1490	1510	1455	1513	1467.7	61	63	59	72	49	65	63	52	49	57	59
372	1462	1397	1456	1492	1466	1465	1493	1516	1461	1520	1472.8	61	63	59	72	49	64	63	52	49	58	59
373	1471	1400	1460	1496	1470	1474	1496	1524	1466	1529	1478.6	61	63	59	72	49	64	63	52	49	59	59.1
374	1476	1403	1464	1502	1480	1475	1502	1525	1473	1535	1483.5	61	63	60	73	49	64	63	52	49	59	59.3
375	1481	1409	1464	1507	1490	1483	1510	1536	1478	1537	1489.5	61	63	60	73	49	64	63	52	49	59	59.3
376	1489	1416	1469	1510	1493	1487	1515	1543	1480	1542	1494.4	61	63	60	75	49	66	64	52	50	59	59.9
377	1496	1418	1471	1517	1495	1492	1519	1545	1484	1545	1498.2	61	63	61	75	49	67	64	52	50	58	60
378	1499	1426	1478	1521	1502	1496	1526	1551	1490	1550	1503.9	61	63	61	75	50	67	64	52	52	58	60.3
379	1505	1429	1484	1524	1512	1503	1534	1553	1493	1553	1509	61	63	61	75	52	67	66	52	52	58	60.7
380	1517	1433	1489	1528	1516	1506	1537	1560	1497	1559	1514.2	61	63	61	75	52	67	66	52	52	58	60.7
381	1528	1437	1495	1535	1519	1508	1546	1571	1499	1560	1519.8	61	63	61	75	52	67	66	52	54	58	60.9
382	1531	1439	1502	1540	1531	1513	1549	1575	1502	1563	1524.5	61	63	61	76	52	67	66	52	54	58	61
383	1537	1444	1509	1550	1534	1517	1553	1580	1508	1567	1529.9	61	62	61	76	52	67	67	53	55	58	61.2
384	1544	1447	1520	1554	1538	1525	1563	1584	1510	1575	1536	61	62	61	76	52	67	67	53	57	58	61.4
385	1549	1451	1526	1560	1541	1528	1567	1592	1516	1584	1541.4	61	63	61	76	52	67	67	53	57	58	61.5
386	1554	1460	1529	1562	1544	1532	1570	1599	1521	1589	1546	61	63	61	77	52	67	67	53	57	59	61.7
387	1557	1464	1534	1564	1550	1539	1575	1599	1525	1593	1550	62	63	61	78	52	67	67	53	57	59	61.9
388	1567	1468	1540	1574	1556	1540	1587	1612	1533	1600	1557.7	62	63	61	78	53	67	68	53	57	59	62.1
389	1574	1476	1545	1586	1560	1546	1593	1617	1535	1609	1564.1	63	63	61	78	53	67	68	53	57	59	62.2
390	1579	1479	1549	1589	1566	1548	1596	1622	1540	1615	1568.3	62	64	61	78	53	67	70	53	57	59	62.4
391	1581	1486	1552	1592	1572	1553	1599	1625	1549	1626	1573.5	62	64	61	79	53	67	70	54	58	59	62.7
392	1589	1489	1556	1596	1576	1560	1604	1628	1557	1634	1578.9	62	65	61	79	53	67	70	54	59	60	63
393	1592	1493	1563	1603	1581	1568	1607	1637	1562	1638	1584.4	62	66	61	79	53	67	70	54	59	61	63.2
394	1599	1499	1571	1611	1589	1569	1617	1645	1564	1647	1591.1	62	66	61	79	53	67	71	54	59	62	63.4
395	1605	1504	1573	1615	1593	1573	1625	1648	1572	1657	1596.5	62	66	61	79	53	66	71	55	60	62	63.5
396	1612	1508	1575	1624	1600	1576	1631	1659	1573	1663	1602.1	62	65	61	81	53	66	71	55	60	62	63.6
397	1615	1510	1585	1629	1601	1580	1639	1664	1579	1667	1606.9	62	65	61	81	53	66	71	55	60	62	63.6
398	1619	1512	1588	1634	1605	1586	1647	1675	1589	1675	1613	62	65	61	81	53	67	72	56	61	62	64
399	1626	1516	1592	1639	1612	1591	1652	1676	1595	1680	1617.9	62	65	61	81	53	67	71	56	61	62	63.9
400	1635	1518	1600	1643	1619	1594	1658	1684	1601	1688	1624	62	65	61	81	53	67	71	56	61	62	63.9
401	1641	1521	1611	1651	1623	1601	1663	1689	1606	1693	1629.9	62	65	61	81	53	67	71	56	61	62	63.9
402	1650	1529	1616	1657	1626	1604	1669	1697	1611	1702	1636.1	62	66	61	81	53	67	73	56	61	62	64.2
403	1657	1535	1621	1662	1631	1614	1674	1704	1617	1710	1642.5	62	66	63	81	54	66	73	56	61	62	64.4
404	1662	1539	1626	1671	1637	1617	1679	1710	1627	1719	1648.7	62	66	63	81	54	66	74	56	61	62	64.5
405	1670	1547	1633	1678	1639	1624	1680	1711	1630	1725	1653.7	62	66	63	82	54	66	74	56	62	62	64.7
406	1675	1556	1637	1685	1643	1634	1684	1718	1634	1731	1659.7	62	67	63	82	54	66	74	56	62	62	64.8
407	1687	1562	1640	1690	1649	1642	1688	1724	1635	1733	1665	62	67	63	82	54	66	74	56	62	62	64.8
408	1692	1563	1644	1697	1650	1649	1692	1729	1640	1743	1669.9	62	69	63	82	54	66	74	56	62	62	65
409	1696	1568	1653	1700	1653	1655	1695	1737	1646	1747	1675	62	69	63	82	54	66	74	57	62	62	65.1
410	1702	1574	1662	1706	1661	1659	1697	1741	1651	1756	1680.9	62	69	63	83	54	66	75	58	62	61	65.3
411	1711	1579	1673	1709	1664	1665	1702	1748	1657	1767	1687.5	63	69	63	83	54	66	75	58	62	62	65.5
412	1716	1588	1682	1713	1666	1668	1709	1750	1660	1776	1692.8	63	71	63	83	55	66	75	58	62	62	65.8
413	1717	1589	1691	1721	1675	1669	1715	1756	1667	1787	1698.7	63	71	64	84	55	66	75	58	62	62	66
414	1719	1594	1699	1733	1678	1675	1720	1758	1674	1792	1704.2	63	72	66	84	55	66	75	58	62	62	66.3
415	1722	1601	1708	1744	1682	1679	1728	1767	1685	1796	1711.2	63	72	66	85	56	66	75	58	62	62	66.5
416	1725	1610	1713	1754	1691	1691	1736	1771	1692	1802	1718.5	63	72	66	85	57	66	75	58	62	62	66.6
417	1731	1615	1719	1759	1696	1699	1750	1776	1700	1808	1725.3	64	72	66	85	57	66	73	58	62	62	66.5
418	1738	1621	1727	1763	1703	1705	1755	1781	1706	1815	1731.4	64	73	66	85	57	66	73	58	62	62	66.6
419	1744	1629	1729	1771	1707	1710	1762	1788	1711	1819	1737	65	73	66	85	57	66	73	58	63	62	66.8
420	1745	1637	1738	1774	1711	1711	1770	1792	1717	1830	1742.5	65	73	66	86	57	67	73	58	63	62	67
421	1748	1641	1744	1778	1717	1714	1785	1796	1722	1837	1748.2	65	74	66	86	57	67	73	58	63	62	67.1
422	1753	1645	1754	1787	1724	1716	1789	1803	1730	1842	1754.3	65	74	66	86	57	67	72	58	63	62	67
423	1758	1648	1759	1793	1733	1721	1793	1805	1738	1853	1760.1	65	74	66	86	57	67	72	58	63	62	67
424	1765	1653	1762	1799	1742	1733	1797	1810	1742	1859	1766.2	65	77	66	86	57	67	72	59	63	62	67.4
425	1772	1655	1767	1808	1746	1741	1799	1812	1749	1865	1771.4	65	77	67	86	57	67	72	59	63	62	67.5
426	1776	1660	1774	1814	1750	1746	1802	1818	1755	1870	1776.5	65	77	67	86	57	67	72	59	63	62	67.5
427	1783	1669	1780	1819	1756	1755	1805	1824	1763	1880	1783.4	65	78	67	86	58	67	72	59	64	62	67.8
428	1790	1678	1789	1826	1763	1760	1809	1827	1766	1886	1789.4	66	78	67	87	58	67	72	59	64	63	68.1
429	1792	1687	1795	1831	1769	1763	1817	1835	1770	1892	1795.1	68	77	66	87	59	67	72	59	64	63	68.2
430	1798	1687	1805	1844	1778	1770	1824	1840	1774	1898	1801.8	68	77	66	88	59	67	72	60	64	65	68.6
431	1807	1691	1814	1849	1786	1771	1832	1849	1786	1905	1809	68	77	66	88	59	67	72	60	64	65	68.6
432	1817	1695	1817	1853	1791	1776	1837	1856	1795	1912	1814.9	68	77	66	88	60	67	70	60	64	65	68.5
433	1821	1703	1826	1860	1799	1782	1844	1865	1799	1923	1822.2	68	80	66	89	60	69	70	60	64	65	69.1
434	1826	1709	1834	1869	1808	1791	1853	1873	1802	1926	1829.1	68	80	66	89	60	69	70	60	64	65	69.1
435	1840	1714	1841	1878	1815	1798	1862	1884	1806	1937	1837.5	68	80	66	89	60	69	70	60	64	66	69.2
436	1844	1726	1849	1881	1820	1808	1873	1889	1817	1943	1845	68	80	66	89	60	69	69	60	64	66	69.1
437	1851	1734	1859	1892	1828	1810	1879	1893	1826	1953	1852.5	68	81	66	89	60	70	70	60	64	66	69.4
438	1862	1742	1870	1904	1839	1815	1885	1900	1833	1966	1861.6	68	82	67	91	60	70	70	60	64	66	69.8
439	1870	1748	1876	1908	1842	1820	1888	1904	1843	1977	1867.6	68	82	68	91	61	70	70	60	65	66	70.1
440	1881	1755	1879	1915	1850	1827	1898	1909	1849	1986	1874.9	68	82	68	91	61	70	71	62	65	66	70.4
441	1886	1764	1886	1925	1852	1833	1905	1921	1858	1996	1882.6	67	82	69	91	61	70	70	62	65	66	70.3
442	1893	1769	1891	1933	1860	1842	1917	1925	1866	2009	1890.5	67	82	69	92	61	70	71	62	65	66	70.5
443	1899	1777	1897	1942	1868	1850	1923	1928	1873	2016	1897.3	67	82	69	93	62	70	71	64	66	66	71
444	1904	1788	1902	1946	1873	1854	1936	1935	1881	2022	1904.1	67	82	68	93	62	70	71	63	66	66	70.8
445	1912	1796	1908	1954	1879	1858	1948	1944	1890	2031	1912	67	82	68	94	62	70	71	64	66	66	71
446	1920	1799	1917	1962	1879	1865	1953	1946	1896	2035	1917.2	67	83	68	94	62	70	71	64	65	66	71
447	1929	1808	1923	1966	1891	1875	1960	1955	1901	2041	1924.9	68	86	68	94	63	70	71	64	65	66	71.5
448	1941	1815	1931	1975	1894	1879	1969	1965	1913	2053	1933.5	68	86	68	94	63	70	72	64	65	67	71.7
449	1947	1824	1939	1981	1900	1887	1980	1970	1920	2059	1940.7	69	86	69	95	63	70	72	64	65	68	72.1
450	1951	1832	1945	1985	1904	1891	1985	1976	1925	2069	1946.3	69	88	70	96	64	70	72	64	65	69	72.7
451	1955	1839	1950	1990	1915	1903	1989	1989	1930	2078	1953.8	69	88	70	97	64	70	72	64	65	69	72.8
452	1961	1841	1957	1993	1921	1907	1995	1999	1940	2083	1959.7	70	88	71	97	65	71	72	64	65	69	73.2
453	1966	1847	1963	1999	1928	1919	2002	2005	1955	2087	1967.1	70	89	71	97	65	71	72	64	65	69	73.3
454	1972	1857	1970	2005	1934	1928	2012	2012	1961	2099	1975	70	89	72	98	65	71	72	64	66	70	73.7
455	1978	1864	1979	2006	1944	1936	2019	2022	1974	2105	1982.7	70	89	72	98	65	71	72	64	67	70	73.8
456	1985	1867	1987	2011	1953	1939	2027	2030	1979	2116	1989.4	70	89	72	98	65	71	74	64	67	70	74
457	1992	1876	1995	2017	1955	1946	2039	2043	1985	2119	1996.7	71	89	73	99	65	71	74	64	68	70	74.4
458	2000	1880	2000	2025	1962	1952	2046	2053	1990	2128	2003.6	72	90	74	100	65	71	74	64	68	69	74.7
459	2004	1887	2010	2033	1967	1958	2052	2061	1999	2138	2010.9	73	90	74	100	65	71	74	64	69	69	74.9
460	2012	1900	2016	2042	1974	1962	2060	2066	2003	2146	2018.1	73	90	74	100	65	71	74	65	69	69	75
461	2018	1902	2031	2047	1981	1967	2066	2070	2014	2153	2024.9	73	91	74	100	65	72	76	65	69	69	75.4
462	2022	1912	2040	2053	1989	1971	2074	2078	2022	2159	2032	73	91	74	100	65	72	76	65	69	70	75.5
463	2029	1914	2049	2059	1998	1976	2085	2086	2027	2166	2038.9	73	91	74	101	65	72	76	66	69	71	75.8
464	2038	1920	2056	2070	2007	1984	2098	2095	2033	2173	2047.4	74	91	74	101	65	72	76	66	69	73	76.1
465	2042	1927	2062	2079	2018	1990	2103	2109	2039	2181	2055	74	91	74	102	65	73	76	67	69	73	76.4
466	2049	1937	2070	2090	2023	1997	2110	2114	2048	2187	2062.5	77	91	74	102	66	73	76	67	70	73	76.9
467	2055	1949	2076	2098	2031	2003	2113	2124	2056	2195	2070	78	91	74	102	66	73	76	67	70	75	77.2
468	2064	1959	2083	2108	2040	2011	2121	2132	2064	2201	2078.3	78	92	74	104	66	73	76	67	71	75	77.6
469	2069	1967	2087	2117	2058	2019	2129	2145	2074	2208	2087.3	79	94	74	104	66	73	76	68	71	76	78.1
470	2075	1972	2098	2125	2064	2025	2135	2150	2086	2221	2095.1	79	94	74	104	66	73	76	69	71	77	78.3
471	2085	1980	2107	2131	2078	2032	2149	2164	2097	2229	2105.2	81	94	74	104	66	73	76	69	71	77	78.5
472	2092	1989	2112	2143	2089	2046	2157	2175	2104	2238	2114.5	81	94	74	104	66	74	76	69	71	77	78.6
473	2101	1998	2118	2152	2094	2049	2162	2183	2110	2247	2121.4	82	94	74	105	66	74	76	69	72	77	78.9
474	2103	2005	2126	2157	2096	2061	2167	2189	2118	2257	2127.9	82	95	74	106	66	74	77	69	73	77	79.3
475	2121	2014	2134	2162	2103	2074	2174	2197	2122	2265	2136.6	82	95	75	106	66	76	77	69	73	78	79.7
476	2130	2021	2144	2168	2116	2080	2180	2200	2129	2277	2144.5	82	96	75	106	66	78	78	69	73	80	80.3
477	2139	2030	2148	2173	2126	2089	2192	2209	2137	2283	2152.6	82	96	75	106	66	78	78	69	73	80	80.3
478	2147	2033	2157	2182	2131	2094	2203	2220	2143	2290	2160	83	97	76	106	66	78	78	69	73	81	80.7
479	2162	2041	2164	2191	2141	2100	2208	2228	2147	2295	2167.7	83	97	76	107	67	78	78	69	73	82	81
480	2173	2050	2168	2196	2154	2108	2214	2234	2152	2300	2174.9	83	97	76	107	67	78	78	70	73	82	81.1
481	2176	2062	2178	2203	2161	2112	2231	2243	2163	2314	2184.3	84	98	77	108	68	79	78	70	73	82	81.7
482	2184	2071	2186	2212	2172	2120	2239	2249	2173	2329	2193.5	84	99	78	109	69	79	78	70	73	83	82.2
483	2187	2077	2195	2222	2180	2135	2246	2254	2181	2338	2201.5	85	99	78	109	69	79	79	69	73	84	82.4
484	2193	2083	2203	2233	2186	2138	2251	2267	2190	2346	2209	87	99	78	111	69	81	80	69	73	84	83.1
485	2196	2088	2213	2247	2193	2142	2261	2274	2197	2356	2216.7	88	99	78	111	70	81	80	69	74	84	83.4
486	2200	2097	2224	2254	2199	2147	2275	2284	2202	2365	2224.7	88	99	78	112	70	81	80	69	75	85	83.7
487	2211	2108	2232	2262	2203	2156	2286	2294	2209	2378	2233.9	88	100	79	112	70	83	82	69	75	85	84.3
488	2217	2119	2236	2266	2212	2161	2297	2301	2217	2388	2241.4	88	100	79	113	70	83	82	69	75	85	84.4
489	2225	2128	2246	2278	2224	2169	2303	2313	2221	2390	2249.7	88	100	78	114	70	83	84	69	75	85	84.6
490	2232	2142	2256	2284	2231	2179	2308	2322	2228	2399	2258.1	89	100	78	114	70	84	84	69	75	85	84.8
491	2237	2147	2261	2292	2242	2192	2321	2333	2237	2406	2266.8	89	100	79	114	70	85	85	69	75	85	85.1
492	2246	2152	2272	2304	2247	2196	2325	2340	2248	2413	2274.3	91	101	79	114	70	84	86	69	75	86	85.5
493	2259	2157	2279	2312	2253	2203	2329	2349	2258	2422	2282.1	91	100	79	114	70	85	86	69	76	86	85.6
494	2265	2165	2287	2325	2258	2216	2335	2357	2266	2435	2290.9	91	100	79	115	70	85	86	69	78	86	85.9
495	2268	2169	2297	2332	2270	2224	2341	2366	2272	2442	2298.1	91	100	79	115	70	86	87	69	78	86	86.1
496	2277	2177	2308	2340	2275	2232	2348	2375	2280	2447	2305.9	91	100	79	116	70	86	87	69	78	86	86.2
497	2289	2189	2319	2347	2281	2244	2353	2383	2284	2457	2314.6	91	101	79	116	71	86	88	69	78	86	86.5
498	2294	2193	2326	2355	2286	2252	2360	2389	2287	2465	2320.7	93	100	80	117	71	86	88	72	80	87	87.4
499	2298	2201	2335	2363	2293	2267	2373	2398	2297	2473	2329.8	93	101	80	118	71	86	89	72	80	87	87.7
500	2302	2208	2346	2377	2300	2277	2379	2405	2302	2479	2337.5	93	101	80	119	71	86	88	72	80	87	87.7
501	2311	2213	2353	2382	2309	2284	2386	2415	2315	2487	2345.5	93	101	81	119	72	87	89	72	80	87	88.1
502	2321	2218	2362	2394	2318	2297	2397	2423	2323	2495	2354.8	93	101	81	120	72	87	89	72	80	87	88.2
503	2328	2232	2368	2404	2320	2303	2405	2429	2336	2502	2362.7	93	101	81	120	75	87	89	73	80	87	88.6
504	2331	2235	2380	2408	2328	2318	2413	2434	2346	2506	2369.9	94	101	81	120	75	87	90	73	80	87	88.8
505	2348	2243	2388	2422	2339	2330	2422	2443	2354	2513	2380.2	94	101	81	121	75	87	90	73	80	87	88.9
506	2358	2255	2400	2431	2343	2341	2429	2451	2363	2521	2389.2	94	101	82	121	75	87	90	73	81	88	89.2
507	2370	2259	2411	2437	2356	2354	2434	2460	2367	2527	2397.5	94	103	83	122	75	87	91	74	81	88	89.8
508	2377	2266	2419	2450	2372	2361	2441	2468	2379	2544	2407.7	96	103	84	123	77	87	93	74	81	88	90.6
509	2388	2279	2428	2460	2384	2374	2453	2478	2385	2562	2419.1	96	104	85	123	77	87	93	75	81	87	90.8
510	2397	2288	2437	2474	2393	2382	2461	2488	2391	2573	2428.4	96	104	85	123	77	88	93	76	82	87	91.1
511	2411	2297	2446	2483	2405	2397	2473	2495	2404	2577	2438.8	96	105	85	124	77	89	94	77	82	87	91.6
512	2421	2310	2454	2492	2414	2402	2484	2509	2417	2584	2448.7	96	104	85	125	78	89	94	78	82	87	91.8
513	2436	2315	2462	2505	2431	2409	2492	2514	2421	2591	2457.6	96	105	87	125	79	89	94	80	82	87	92.4
514	2444	2324	2472	2512	2441	2418	2496	2522	2433	2599	2466.1	96	105	87	125	79	91	95	80	82	87	92.7
515	2454	2339	2478	2517	2448	2429	2505	2530	2442	2604	2474.6	96	105	88	125	79	92	95	80	82	87	92.9
516	2461	2343	2488	2525	2464	2436	2518	2539	2453	2616	2484.3	96	104	88	127	80	92	94	80	82	87	93
517	2462	2352	2496	2529	2474	2444	2523	2549	2460	2627	2491.6	98	104	88	127	81	92	96	80	82	88	93.6
518	2472	2365	2505	2541	2477	2461	2534	2556	2467	2634	2501.2	99	104	88	127	81	93	96	80	83	88	93.9
519	2483	2377	2513	2549	2482	2476	2540	2561	2477	2645	2510.3	99	104	88	127	81	93	96	80	83	88	93.9
520	2487	2387	2522	2556	2493	2480	2549	2574	2481	2656	2518.5	99	104	88	128	84	93	96	80	84	88	94.4
521	2499	2397	2526	2561	2504	2486	2559	2583	2494	2661	2527	99	104	88	129	84	94	95	80	84	89	94.6
522	2506	2405	2534	2565	2511	2502	2567	2597	2501	2675	2536.3	99	104	88	129	84	95	95	80	85	89	94.8
523	2516	2412	2545	2577	2517	2511	2575	2602	2509	2682	2544.6	99	104	89	130	84	97	95	80	86	90	95.4
524	2524	2421	2555	2587	2520	2515	2583	2611	2519	2690	2552.5	99	104	92	130	84	97	95	80	87	90	95.8
525	2542	2433	2558	2596	2533	2525	2594	2624	2527	2703	2563.5	103	104	93	130	84	99	95	79	88	90	96.5
526	2554	2445	2560	2607	2543	2539	2607	2635	2535	2714	2573.9	103	106	94	131	84	99	96	79	89	91	97.2
527	2566	2448	2569	2614	2552	2549	2625	2645	2544	2721	2583.3	103	108	94	131	84	101	97	80	89	92	97.9
528	2578	2455	2579	2620	2557	2563	2637	2652	2558	2730	2592.9	103	108	95	131	84	102	97	80	89	92	98.1
529	2584	2471	2590	2629	2566	2579	2643	2661	2571	2739	2603.3	104	107	95	131	85	103	97	80	91	92	98.5
530	2595	2479	2597	2635	2576	2587	2649	2670	2580	2750	2611.8	104	107	95	130	85	103	98	79	90	93	98.4
531	2607	2491	2605	2646	2589	2595	2656	2690	2587	2764	2623	104	107	95	130	85	105	98	79	90	93	98.6
532	2619	2502	2611	2656	2598	2600	2669	2704	2595	2772	2632.6	105	107	95	130	86	105	98	79	90	93	98.8
533	2625	2511	2613	2664	2606	2614	2676	2717	2603	2784	2641.3	105	107	95	130	86	105	98	79	91	95	99.1
534	2635	2518	2621	2682	2619	2629	2689	2726	2614	2795	2652.8	105	107	96	131	87	105	98	79	91	96	99.5
535	2645	2525	2627	2689	2631	2637	2696	2736	2628	2809	2662.3	104	109	96	132	87	105	98	80	91	97	99.9
536	2654	2533	2632	2703	2647	2649	2707	2749	2640	2818	2673.2	105	109	96	132	89	105	99	80	92	98	100.5
537	2657	2545	2638	2712	2657	2659	2720	2758	2648	2827	2682.1	104	111	96	132	90	105	99	81	92	100	101
538	2669	2553	2646	2727	2662	2669	2740	2772	2654	2833	2692.5	104	111	96	134	90	105	99	81	92	100	101.2
539	2677	2560	2661	2737	2671	2681	2752	2779	2670	2846	2703.4	104	111	96	134	90	105	99	81	92	100	101.2
540	2689	2564	2667	2748	2682	2689	2760	2794	2682	2859	2713.4	104	111	96	134	90	105	99	81	92	100	101.2
541	2695	2571	2674	2757	2697	2704	2774	2806	2695	2865	2723.8	104	110	97	134	90	105	100	81	94	100	101.5
542	2702	2581	2682	2768	2699	2717	2785	2825	2708	2868	2733.5	103	110	97	134	91	106	101	81	94	101	101.8
543	2706	2593	2692	2778	2713	2732	2789	2834	2714	2878	2742.9	103	111	99	135	93	105	102	81	94	101	102.4
544	2712	2598	2705	2787	2721	2741	2795	2842	2728	2892	2752.1	104	111	99	136	93	105	102	81	94	101	102.6
545	2725	2603	2711	2796	2728	2751	2800	2855	2739	2900	2760.8	104	110	97	137	93	106	104	84	94	101	103
546	2736	2611	2722	2803	2743	2761	2808	2865	2747	2909	2770.5	104	112	99	138	93	106	104	84	95	101	103.6
547	2744	2618	2734	2810	2749	2775	2816	2876	2758	2916	2779.6	104	112	100	138	93	106	105	84	95	101	103.8
548	2753	2629	2739	2831	2760	2788	2821	2882	2767	2928	2789.8	104	114	101	138	93	106	106	85	95	101	104.3
549	2764	2639	2745	2840	2766	2804	2832	2890	2775	2940	2799.5	104	114	101	138	94	106	107	84	94	101	104.3
550	2779	2646	2761	2846	2770	2812	2836	2898	2783	2956	2808.7	103	114	101	138	94	107	107	85	94	101	104.4
551	2791	2648	2772	2850	2779	2822	2844	2912	2793	2965	2817.6	103	113	101	139	94	107	109	86	94	102	104.8
552	2795	2662	2783	2862	2788	2830	2850	2920	2800	2971	2826.1	103	113	102	140	95	108	110	85	94	102	105.2
553	2803	2672	2799	2876	2804	2841	2856	2931	2806	2980	2836.8	104	113	102	140	95	108	111	85	94	102	105.4
554	2810	2680	2811	2890	2809	2855	2864	2938	2814	2991	2846.2	104	113	101	140	95	108	111	85	94	103	105.4
555	2816	2685	2820	2898	2820	2866	2875	2949	2826	3003	2855.8	103	113	101	141	95	108	111	85	93	103	105.3
556	2831	2693	2829	2909	2828	2878	2892	2968	2832	3010	2867	104	113	101	142	95	107	111	85	93	103	105.4
557	2839	2706	2840	2922	2834	2885	2904	2977	2847	3020	2877.4	104	113	102	142	95	107	112	85	94	103	105.7
558	2850	2721	2854	2932	2843	2891	2914	2990	2853	3029	2887.7	104	113	102	143	95	107	112	85	94	105	106
559	2865	2732	2869	2943	2856	2903	2923	3006	2860	3042	2899.9	104	114	102	143	95	107	113	85	94	107	106.4
560	2875	2746	2883	2955	2864	2908	2942	3014	2874	3053	2911.4	104	114	103	143	95	108	113	85	94	107	106.6
561	2890	2752	2893	2968	2878	2920	2955	3026	2882	3061	2922.5	104	115	104	143	96	108	113	85	94	107	106.9
562	2899	2757	2906	2977	2889	2928	2965	3043	2894	3072	2933	104	116	105	145	97	107	113	85	96	108	107.6
563	2911	2774	2918	2990	2898	2932	2976	3052	2902	3084	2943.7	104	116	105	145	98	107	115	85	97	108	108
564	2929	2779	2925	2997	2904	2941	2986	3064	2910	3097	2953.2	104	117	105	146	98	107	115	85	96	108	108.1
565	2944	2791	2929	3003	2913	2950	2997	3072	2921	3107	2962.7	106	118	107	146	99	107	115	85	97	109	108.9
566	2949	2803	2945	3017	2921	2960	3007	3081	2934	3118	2973.5	106	117	107	147	99	107	115	85	97	109	108.9
567	2962	2812	2954	3034	2929	2971	3022	3086	2944	3127	2984.1	106	118	107	148	99	106	116	85	97	109	109.1
568	2971	2824	2967	3044	2939	2978	3029	3103	2949	3146	2995	107	117	107	148	101	106	116	86	98	109	109.5
569	2978	2829	2979	3053	2951	2991	3043	3115	2954	3162	3005.5	107	119	108	148	101	106	116	88	98	109	110
570	2989	2837	2993	3062	2962	2997	3052	3127	2967	3181	3016.7	108	118	108	148	102	106	116	89	98	109	110.2
571	2994	2842	3009	3070	2975	3000	3070	3137	2978	3188	3026.3	108	117	108	149	102	106	116	89	98	110	110.3
572	3003	2854	3018	3083	2986	3018	3078	3144	2989	3202	3037.5	108	117	108	149	103	106	116	91	98	110	110.6
573	3013	2863	3032	3088	2998	3030	3094	3157	2998	3212	3048.5	109	119	108	151	103	106	117	91	98	110	111.2
574	3025	2873	3045	3098	3008	3037	3108	3163	3005	3232	3059.4	109	120	108	151	103	108	117	91	98	110	111.5
575	3036	2878	3056	3110	3023	3053	3125	3177	3024	3237	3071.9	109	119	109	151	103	108	117	92	98	110	111.6
576	3051	2888	3068	3122	3037	3063	3133	3189	3040	3239	3083	109	119	109	152	104	109	117	92	99	109	111.9
577	3061	2896	3074	3129	3042	3071	3151	3196	3050	3251	3092.1	110	120	109	153	104	109	117	92	100	109	112.3
578	3068	2904	3089	3138	3054	3080	3168	3208	3062	3271	3104.2	110	120	109	153	104	110	117	93	101	109	112.6
579	3073	2910	3107	3145	3061	3088	3185	3220	3071	3283	3114.3	110	120	109	153	104	110	117	93	102	109	112.7
580	3083	2917	3117	3152	3074	3097	3195	3240	3083	3293	3125.1	110	120	110	153	104	111	117	93	102	110	113
581	3096	2925	3130	3167	3087	3109	3203	3248	3096	3314	3137.5	110	122	110	153	105	113	117	94	102	111	113.7
582	3104	2936	3137	3175	3097	3118	3209	3259	3113	3322	3147	110	122	110	154	105	114	118	94	102	111	114
583	3114	2944	3151	3190	3106	3130	3221	3273	3125	3326	3158	111	119	112	155	105	114	118	95	101	112	114.2
584	3121	2955	3160	3197	3109	3136	3236	3283	3135	3339	3167.1	111	119	112	155	105	114	118	95	101	112	114.2
585	3128	2969	3172	3210	3122	3148	3246	3300	3142	3352	3178.9	111	121	112	155	105	114	120	96	101	112	114.7
586	3142	2980	3181	3228	3138	3160	3254	3310	3152	3368	3191.3	111	121	112	157	105	116	120	95	101	112	115
587	3150	2991	3192	3239	3153	3169	3265	3316	3164	3378	3201.7	111	121	114	157	105	116	120	95	102	112	115.3
588	3167	3004	3208	3250	3166	3179	3278	3325	3173	3388	3213.8	112	120	115	157	106	116	120	95	101	112	115.4
589	3180	3010	3221	3266	3177	3188	3288	3332	3183	3398	3224.3	112	119	115	158	106	116	121	95	102	112	115.6
590	3187	3018	3235	3280	3186	3202	3310	3341	3197	3411	3236.7	112	120	115	159	107	116	121	95	102	113	116
591	3192	3030	3257	3293	3194	3217	3320	3350	3204	3430	3248.7	112	120	116	159	107	116	121	96	103	113	116.3
592	3204	3042	3260	3308	3206	3225	3333	3360	3217	3446	3260.1	111	121	116	161	107	116	121	96	104	113	116.6
593	3222	3056	3273	3319	3224	3232	3342	3370	3227	3453	3271.8	111	121	117	161	108	116	121	96	104	113	116.8
594	3233	3068	3284	3329	3235	3241	3358	3379	3238	3469	3283.4	112	121	117	161	108	119	122	97	104	114	117.5
595	3249	3080	3292	3343	3240	3248	3369	3394	3256	3480	3295.1	112	125	116	161	108	119	122	98	103	114	117.8
596	3264	3095	3308	3355	3249	3262	3389	3403	3266	3504	3309.5	112	125	116	162	108	119	122	98	103	115	118
597	3272	3101	3325	3366	3258	3268	3399	3413	3282	3521	3320.5	113	125	117	165	108	119	122	98	103	116	118.6
598	3285	3112	3335	3384	3273	3277	3408	3422	3289	3528	3331.3	115	125	117	166	108	120	123	98	104	117	119.3
599	3296	3121	3341	3402	3283	3285	3419	3432	3298	3545	3342.2	117	125	117	166	109	121	123	98	104	118	119.8
600	3309	3132	3350	3411	3293	3295	3428	3450	3306	3556	3353	118	125	117	166	109	121	122	98	104	118	119.8
601	3320	3137	3357	3425	3310	3305	3441	3459	3324	3572	3365	119	125	117	167	109	122	123	98	106	119	120.5
602	3338	3148	3371	3432	3328	3321	3456	3478	3340	3589	3380.1	119	126	117	167	109	122	123	98	106	119	120.6
603	3347	3162	3383	3444	3342	3330	3463	3485	3354	3607	3391.7	118	129	117	168	110	121	123	99	106	120	121.1
604	3356	3182	3394	3460	3365	3340	3474	3501	3366	3617	3405.5	118	130	117	168	110	120	124	99	106	122	121.4
605	3369	3199	3419	3472	3374	3353	3487	3512	3374	3625	3418.4	118	130	117	168	111	120	125	99	107	123	121.8
606	3384	3215	3432	3483	3387	3363	3500	3522	3389	3640	3431.5	118	130	117	169	111	120	125	99	108	123	122
607	3399	3223	3446	3491	3402	3378	3512	3539	3394	3657	3444.1	118	130	118	170	111	120	127	99	108	123	122.4
608	3407	3240	3454	3512	3411	3382	3518	3550	3413	3671	3455.8	119	131	119	171	112	119	127	99	109	124	123
609	3416	3252	3464	3522	3421	3405	3535	3564	3426	3681	3468.6	119	131	119	171	113	121	127	100	108	125	123.4
610	3433	3266	3483	3530	3433	3412	3548	3578	3433	3698	3481.4	119	131	119	171	114	121	127	101	108	125	123.6
611	3448	3279	3493	3537	3452	3431	3560	3596	3441	3711	3494.8	119	131	120	171	114	121	128	102	110	126	124.2
612	3458	3293	3506	3553	3462	3444	3575	3611	3453	3719	3507.4	119	132	120	173	115	121	129	102	110	126	124.7
613	3473	3300	3514	3566	3472	3453	3593	3626	3462	3744	3520.3	119	133	121	174	115	122	128	103	110	126	125.1
614	3490	3315	3524	3579	3480	3463	3610	3649	3471	3763	3534.4	119	135	121	174	115	122	129	103	110	126	125.4
615	3501	3325	3538	3590	3492	3476	3629	3657	3493	3770	3547.1	119	137	121	174	115	122	128	103	110	126	125.5
616	3518	3339	3554	3602	3509	3489	3644	3672	3512	3780	3561.9	121	138	121	174	116	122	129	104	110	127	126.2
617	3529	3355	3571	3616	3525	3499	3666	3688	3531	3787	3576.7	121	138	121	175	118	122	130	104	110	128	126.7
618	3539	3365	3588	3629	3541	3512	3675	3699	3542	3803	3589.3	122	138	122	176	120	122	130	105	110	128	127.3
619	3556	3384	3605	3641	3554	3518	3699	3715	3557	3824	3605.3	122	138	122	175	120	123	130	105	110	128	127.3
620	3576	3390	3617	3659	3565	3532	3711	3729	3567	3838	3618.4	122	138	122	175	120	124	131	105	110	132	127.9
621	3591	3401	3628	3671	3578	3538	3725	3742	3580	3848	3630.2	122	138	122	176	121	124	131	105	110	133	128.2
622	3598	3415	3647	3682	3598	3548	3735	3745	3590	3866	3642.4	122	139	123	176	121	124	132	107	110	134	128.8
623	3608	3425	3668	3694	3612	3561	3747	3763	3603	3883	3656.4	122	140	123	176	121	125	133	107	110	134	129.1
624	3623	3440	3679	3710	3624	3579	3762	3777	3611	3903	3670.8	122	141	125	177	121	125	132	107	111	134	129.5
625	3642	3454	3699	3722	3635	3598	3778	3789	3626	3916	3685.9	122	142	125	177	122	126	133	107	111	134	129.9
626	3658	3464	3711	3733	3648	3613	3795	3798	3639	3932	3699.1	124	143	125	177	122	125	132	107	111	134	130
627	3677	3479	3722	3745	3658	3636	3803	3815	3651	3951	3713.7	124	146	125	177	122	126	133	107	112	134	130.6
628	3689	3485	3738	3759	3669	3651	3821	3833	3668	3965	3727.8	124	147	125	178	122	126	133	107	115	135	131.2
629	3695	3505	3756	3771	3684	3671	3831	3853	3679	3970	3741.5	124	147	128	179	122	127	132	107	116	134	131.6
630	3709	3517	3768	3786	3693	3688	3845	3868	3691	3986	3755.1	124	146	129	179	123	127	133	108	116	132	131.7
631	3721	3539	3789	3800	3703	3700	3862	3883	3707	3999	3770.3	124	147	130	181	124	128	134	108	116	131	132.3
632	3734	3553	3800	3818	3719	3714	3875	3892	3719	4014	3783.8	124	148	130	184	125	128	135	108	116	134	133.2
633	3752	3562	3809	3823	3732	3734	3895	3909	3725	4024	3796.5	124	152	130	185	125	128	135	108	116	134	133.7
634	3767	3580	3825	3843	3744	3748	3910	3919	3731	4040	3810.7	127	154	130	185	126	128	136	107	116	134	134.3
635	3793	3596	3840	3856	3759	3762	3922	3930	3756	4054	3826.8	127	154	130	185	126	128	136	107	117	134	134.4
636	3807	3612	3849	3869	3772	3770	3938	3945	3773	4070	3840.5	128	155	130	185	126	132	136	107	117	133	134.9
637	3821	3625	3862	3888	3784	3783	3955	3960	3786	4083	3854.7	129	155	129	185	126	133	137	107	117	133	135.1
638	3830	3636	3879	3902	3795	3797	3970	3977	3804	4097	3868.7	129	155	129	186	126	133	137	108	117	133	135.3
639	3845	3653	3896	3921	3811	3817	3985	3992	3821	4111	3885.2	130	155	129	186	126	133	136	108	117	133	135.3
640	3858	3668	3911	3938	3824	3831	3997	4009	3840	4125	3900.1	130	155	129	186	126	133	135	108	117	133	135.2
641	3871	3683	3927	3956	3837	3837	4013	4027	3849	4139	3913.9	133	155	130	186	127	133	136	108	117	133	135.8
642	3888	3695	3933	3966	3851	3850	4028	4039	3870	4148	3926.8	134	154	131	186	128	133	138	108	118	136	136.6
643	3915	3712	3949	3983	3867	3864	4045	4052	3883	4162	3943.2	134	155	131	187	129	135	138	110	118	136	137.3
644	3928	3730	3967	3999	3878	3879	4064	4076	3904	4183	3960.8	136	155	132	187	129	135	138	110	118	136	137.6
645	3945	3741	3985	4020	3891	3894	4075	4090	3911	4194	3974.6	137	155	132	188	130	136	139	111	119	136	138.3
646	3963	3753	4001	4039	3905	3904	4099	4101	3923	4204	3989.2	139	155	132	190	130	136	140	111	119	135	138.7
647	3974	3770	4012	4054	3919	3920	4112	4114	3949	4215	4003.9	139	154	132	193	131	136	141	111	119	133	138.9
648	3985	3778	4025	4073	3938	3929	4139	4127	3969	4226	4018.9	140	154	132	193	131	136	141	111	119	134	139.1
649	3997	3797	4044	4090	3951	3941	4150	4145	3978	4247	4034	141	154	132	195	131	136	142	111	119	133	139.4
650	4004	3811	4055	4106	3970	3951	4170	4158	3995	4262	4048.2	141	154	131	195	131	136	142	111	119	133	139.3
651	4018	3826	4074	4116	3982	3973	4183	4176	4012	4283	4064.3	141	155	131	195	132	136	144	111	121	135	140.1
652	4031	3835	4082	4129	3995	3983	4199	4187	4037	4302	4078	141	156	131	196	132	137	144	111	122	134	140.4
653	4049	3850	4093	4148	4019	3996	4209	4201	4057	4314	4093.6	141	156	131	198	132	137	144	112	122	134	140.7
654	4055	3864	4110	4164	4033	4021	4219	4219	4068	4331	4108.4	141	157	131	200	132	137	146	113	122	135	141.4
655	4076	3883	4121	4173	4049	4040	4236	4232	4086	4349	4124.5	141	158	131	200	133	137	147	115	122	137	142.1
656	4091	3894	4137	4182	4061	4052	4247	4247	4102	4365	4137.8	141	158	134	201	133	137	146	115	123	138	142.6
657	4108	3907	4155	4198	4078	4060	4259	4257	4124	4377	4152.3	142	158	134	201	133	137	147	115	123	138	142.8
658	4125	3924	4170	4212	4098	4076	4271	4266	4140	4386	4166.8	144	159	135	201	133	137	147	114	124	140	143.4
659	4138	3938	4197	4226	4109	4090	4287	4287	4147	4401	4182	144	159	137	203	134	137	147	117	124	142	144.4
660	4151	3948	4209	4238	4128	4102	4297	4305	4162	4409	4194.9	146	159	137	204	134	137	146	118	125	142	144.8
661	4172	3963	4223	4249	4139	4113	4313	4320	4171	4422	4208.5	147	159	137	206	134	138	146	118	127	142	145.4
662	4188	3973	4234	4270	4154	4129	4332	4331	4186	4433	4223	148	159	137	206	134	138	146	118	128	142	145.6
663	4205	3981	4256	4285	4163	4153	4348	4347	4205	4446	4238.9	149	159	137	208	135	139	146	118	128	144	146.3
664	4219	3994	4270	4304	4179	4168	4369	4363	4220	4464	4255	152	159	138	208	136	139	146	118	130	144	147
665	4237	4008	4287	4319	4195	4189	4383	4380	4226	4476	4270	153	160	137	209	137	139	147	118	130	144	147.4
666	4246	4019	4297	4335	4213	4201	4400	4401	4239	4491	4284.2	153	162	139	210	139	139	147	118	130	144	148.1
667	4256	4032	4315	4348	4233	4210	4412	4408	4255	4512	4298.1	154	162	139	214	140	139	148	119	130	144	148.9
668	4262	4045	4332	4362	4250	4225	4427	4433	4265	4524	4312.5	155	162	140	215	141	140	149	119	130	144	149.5
669	4279	4062	4350	4384	4267	4240	4435	4450	4281	4546	4329.4	155	163	141	215	141	142	149	119	130	146	150.1
670	4299	4077	4363	4397	4280	4262	4453	4465	4300	4556	4345.2	156	164	144	216	142	143	150	119	130	148	151.2
671	4318	4089	4381	4414	4291	4289	4472	4477	4313	4573	4361.7	157	164	144	216	142	143	152	119	130	148	151.5
672	4330	4107	4392	4432	4301	4300	4485	4500	4328	4589	4376.4	158	164	144	216	144	145	152	119	130	148	152
673	4351	4129	4412	4444	4316	4314	4495	4528	4344	4608	4394.1	158	165	144	216	144	146	153	119	131	148	152.4
674	4364	4155	4424	4466	4323	4328	4503	4543	4356	4620	4408.2	159	166	144	217	145	146	153	119	131	150	153
675	4382	4170	4438	4487	4348	4352	4518	4557	4378	4641	4427.1	159	168	144	218	145	149	155	119	132	151	154
676	4401	4185	4450	4502	4366	4368	4535	4572	4392	4652	4442.3	161	168	146	219	147	151	155	119	133	152	155.1
677	4418	4200	4468	4526	4379	4386	4550	4585	4412	4664	4458.8	161	168	146	220	147	151	155	121	132	152	155.3
678	4437	4212	4483	4542	4392	4406	4575	4599	4426	4680	4475.2	162	169	145	221	147	152	155	123	132	153	155.9
679	4451	4225	4495	4557	4401	4417	4590	4619	4437	4696	4488.8	163	172	145	221	148	152	155	124	132	154	156.6
680	4465	4239	4510	4574	4417	4434	4610	4634	4454	4716	4505.3	163	172	145	221	148	152	155	126	132	156	157
681	4478	4248	4523	4588	4431	4447	4623	4643	4469	4730	4518	163	172	146	221	148	153	155	126	132	156	157.2
682	4497	4267	4538	4606	4447	4468	4637	4666	4482	4740	4534.8	163	172	147	221	151	153	155	129	132	156	157.9
683	4512	4286	4554	4619	4460	4490	4649	4692	4498	4766	4552.6	165	173	147	222	152	154	155	129	132	156	158.5
684	4525	4304	4572	4639	4477	4507	4663	4709	4514	4780	4569	165	173	147	224	152	154	156	129	134	157	159.1
685	4540	4316	4576	4652	4495	4520	4674	4733	4533	4796	4583.5	166	173	147	226	152	154	156	130	135	157	159.6
686	4556	4335	4593	4679	4511	4531	4694	4742	4553	4809	4600.3	168	173	148	227	152	154	157	131	135	157	160.2
687	4568	4354	4609	4701	4522	4553	4704	4760	4573	4820	4616.4	168	173	148	228	152	154	157	131	136	157	160.4
688	4582	4374	4616	4717	4533	4569	4735	4782	4587	4845	4634	168	173	149	228	153	157	158	132	137	157	161.2
689	4596	4388	4637	4735	4545	4587	4752	4801	4603	4870	4651.4	168	174	150	228	153	157	158	133	137	157	161.5
690	4611	4402	4654	4753	4565	4612	4768	4817	4620	4886	4668.8	170	176	148	229	153	158	158	134	139	158	162.3
691	4620	4425	4667	4763	4589	4628	4783	4828	4640	4911	4685.4	171	178	151	230	154	159	158	134	139	158	163.2
692	4639	4441	4682	4773	4599	4641	4793	4844	4654	4923	4698.9	174	178	152	231	154	160	158	135	140	158	164
693	4659	4458	4695	4788	4616	4663	4811	4869	4675	4939	4717.3	174	180	153	232	154	160	161	135	140	157	164.6
694	4675	4478	4714	4806	4634	4673	4827	4882	4695	4950	4733.4	175	180	154	232	155	160	161	136	140	157	165
695	4692	4494	4729	4823	4650	4698	4837	4900	4710	4958	4749.1	175	180	154	232	155	160	164	136	140	157	165.3
696	4714	4514	4742	4835	4664	4711	4853	4924	4724	4974	4765.5	175	180	154	233	156	161	165	135	140	157	165.6
697	4733	4528	4762	4856	4688	4731	4868	4940	4746	4995	4784.7	175	181	154	233	156	161	166	135	140	157	165.8
698	4755	4549	4789	4877	4705	4748	4888	4957	4761	5010	4803.9	174	182	155	235	156	162	166	135	144	157	166.6
699	4769	4568	4806	4889	4725	4763	4908	4979	4776	5025	4820.8	176	184	155	236	156	162	167	135	145	158	167.4
700	4786	4584	4824	4908	4735	4789	4921	4998	4802	5047	4839.4	177	185	155	237	158	165	168	136	148	157	168.6
701	4806	4598	4843	4920	4755	4809	4938	5013	4812	5059	4855.3	177	186	156	238	160	165	167	135	148	157	168.9
702	4825	4613	4873	4939	4775	4817	4946	5029	4833	5076	4872.6	177	186	157	238	162	166	165	138	149	157	169.5
703	4837	4632	4896	4955	4797	4835	4964	5055	4855	5096	4892.2	177	187	158	238	162	167	166	138	150	158	170.1
704	4856	4656	4912	4971	4816	4850	4983	5069	4880	5113	4910.6	177	187	158	240	162	168	166	138	152	158	170.6
705	4871	4667	4926	4988	4840	4868	5002	5084	4893	5135	4927.4	178	187	159	241	163	168	166	138	152	158	171
706	4891	4679	4949	5011	4857	4897	5017	5102	4906	5159	4946.8	178	188	159	242	163	168	170	138	153	158	171.7
707	4902	4694	4970	5041	4871	4912	5035	5119	4919	5179	4964.2	181	187	161	244	163	168	171	138	153	158	172.4
708	4922	4714	4990	5061	4890	4935	5058	5135	4944	5197	4984.6	183	187	162	247	164	170	171	138	153	158	173.3
709	4939	4730	5007	5086	4901	4950	5075	5152	4958	5218	5001.6	184	187	162	247	165	172	169	138	153	158	173.5
710	4960	4748	5018	5109	4915	4963	5096	5176	4972	5231	5018.8	184	187	162	250	166	172	170	140	153	159	174.3
711	4981	4769	5031	5130	4935	4981	5112	5194	4991	5252	5037.6	184	187	162	252	167	174	173	142	154	160	175.5
712	4998	4791	5043	5147	4959	5001	5124	5210	5012	5271	5055.6	184	188	162	253	168	174	173	143	154	160	175.9
713	5010	4811	5059	5162	4973	5022	5144	5227	5035	5292	5073.5	184	188	163	256	169	177	173	143	155	161	176.9
714	5028	4834	5082	5184	4996	5040	5154	5247	5050	5318	5093.3	183	188	164	257	169	181	172	144	156	162	177.6
715	5047	4844	5099	5200	5014	5052	5176	5265	5067	5333	5109.7	183	189	164	257	170	181	172	144	157	165	178.2
716	5070	4863	5115	5226	5022	5063	5190	5290	5094	5353	5128.6	183	190	164	257	171	181	172	144	159	166	178.7
717	5095	4886	5129	5242	5043	5080	5216	5304	5109	5364	5146.8	183	190	165	257	171	183	173	144	159	166	179.1
718	5113	4901	5145	5259	5053	5111	5225	5324	5122	5380	5163.3	183	191	166	257	171	183	173	145	160	166	179.5
719	5130	4916	5170	5278	5069	5130	5241	5345	5142	5405	5182.6	184	192	167	258	171	183	172	145	160	168	180
720	5140	4932	5190	5294	5084	5148	5262	5368	5158	5417	5199.3	184	194	168	258	171	183	171	145	160	170	180.4
721	5159	4948	5206	5312	5103	5170	5277	5379	5182	5434	5217	184	194	169	259	172	183	171	144	161	171	180.8
722	5178	4970	5219	5329	5127	5184	5300	5399	5198	5454	5235.8	186	194	171	262	172	183	170	144	161	171	181.4
723	5197	4992	5242	5352	5142	5197	5323	5420	5216	5473	5255.4	187	197	171	264	172	184	170	148	162	170	182.5
724	5205	5009	5262	5366	5160	5214	5348	5439	5236	5495	5273.4	187	197	171	265	174	184	171	149	161	170	182.9
725	5234	5025	5284	5378	5182	5235	5368	5452	5264	5517	5293.9	188	196	171	265	174	184	171	150	162	170	183.1
726	5250	5044	5303	5398	5200	5258	5387	5482	5278	5528	5312.8	188	197	171	266	175	182	172	152	162	170	183.5
727	5270	5065	5313	5423	5220	5277	5408	5509	5294	5541	5332	188	198	171	266	175	183	171	153	161	171	183.7
728	5289	5081	5331	5445	5239	5292	5426	5532	5312	5556	5350.3	188	198	171	267	176	184	173	155	162	172	184.6
729	5305	5098	5355	5461	5258	5308	5456	5554	5325	5581	5370.1	189	201	172	268	177	184	174	155	162	172	185.4
730	5328	5112	5380	5476	5277	5329	5474	5574	5337	5605	5389.2	189	201	174	268	178	184	175	156	162	172	185.9
731	5347	5127	5398	5502	5307	5343	5495	5608	5364	5624	5411.5	189	203	174	268	179	186	175	155	162	174	186.5
732	5375	5141	5419	5521	5325	5362	5518	5626	5382	5645	5431.4	190	203	175	268	180	186	175	154	161	177	186.9
733	5393	5157	5444	5535	5345	5385	5542	5662	5397	5661	5452.1	190	203	175	269	180	186	176	154	162	177	187.2
734	5409	5178	5477	5559	5368	5406	5564	5677	5424	5688	5475	189	202	175	269	181	187	176	154	164	177	187.4
735	5429	5191	5498	5574	5385	5425	5585	5713	5443	5705	5494.8	189	202	176	270	181	187	177	153	164	177	187.6
736	5447	5213	5518	5587	5405	5437	5603	5730	5463	5716	5511.9	190	202	179	271	181	188	177	154	165	177	188.4
737	5463	5229	5547	5609	5418	5464	5625	5744	5480	5739	5531.8	190	203	180	270	182	188	177	154	165	176	188.5
738	5484	5248	5569	5628	5436	5486	5641	5770	5499	5760	5552.1	191	203	181	272	182	188	178	154	167	176	189.2
739	5502	5273	5583	5649	5460	5511	5663	5790	5518	5781	5573	191	203	182	272	183	187	178	154	167	176	189.3
740	5520	5295	5602	5670	5478	5526	5687	5809	5549	5807	5594.3	191	203	184	272	183	187	180	153	168	178	189.9
741	5536	5309	5630	5695	5498	5547	5701	5820	5566	5830	5613.2	191	203	184	274	184	188	180	155	168	179	190.6
742	5552	5328	5647	5706	5519	5575	5729	5833	5585	5842	5631.6	193	205	185	274	183	188	182	155	168	179	191.2
743	5569	5342	5667	5732	5532	5593	5748	5858	5607	5869	5651.7	194	206	186	275	184	188	183	155	169	179	191.9
744	5586	5361	5690	5749	5553	5607	5770	5888	5637	5887	5672.8	196	208	186	276	184	190	183	155	169	179	192.6
745	5616	5379	5714	5774	5575	5631	5786	5904	5647	5919	5694.5	197	207	188	277	184	191	183	154	169	180	193
746	5635	5404	5730	5792	5594	5658	5797	5925	5674	5945	5715.4	201	208	188	277	184	191	184	155	170	180	193.8
747	5663	5417	5758	5819	5615	5673	5813	5944	5699	5977	5737.8	204	209	190	279	184	193	185	155	171	180	195
748	5677	5432	5778	5838	5630	5687	5831	5965	5730	5995	5756.3	204	210	192	279	184	196	185	157	171	181	195.9
749	5693	5444	5802	5853	5657	5700	5856	5989	5754	6012	5776	205	211	192	282	184	196	185	158	172	181	196.6
750	5709	5465	5814	5877	5688	5723	5880	6002	5767	6043	5796.8	206	211	193	282	185	198	185	156	173	184	197.3
751	5732	5483	5834	5904	5709	5734	5907	6027	5794	6071	5819.5	206	211	193	283	185	198	186	156	173	185	197.6
752	5741	5497	5861	5920	5728	5751	5931	6047	5811	6097	5838.4	206	211	195	285	185	198	186	156	174	186	198.2
753	5759	5521	5875	5941	5751	5771	5957	6065	5829	6118	5858.7	206	213	197	285	186	200	187	156	173	188	199.1
754	5772	5541	5890	5967	5769	5794	5982	6086	5849	6137	5878.7	206	213	197	286	187	200	187	158	173	189	199.6
755	5802	5567	5917	5983	5791	5810	6000	6103	5870	6157	5900	207	213	198	287	187	202	188	158	172	190	200.2
756	5818	5587	5943	6002	5812	5830	6027	6128	5890	6170	5920.7	208	213	201	290	189	202	188	159	175	190	201.5
757	5847	5610	5974	6025	5834	5852	6047	6150	5910	6193	5944.2	210	215	201	290	192	205	191	159	175	190	202.8
758	5866	5623	6000	6053	5858	5876	6063	6173	5932	6215	5965.9	210	215	201	290	193	205	192	158	175	191	203
759	5890	5643	6017	6081	5877	5895	6093	6195	5951	6228	5987	211	216	202	290	196	205	193	158	175	194	204
760	5906	5666	6039	6095	5904	5910	6120	6210	5968	6254	6007.2	213	216	204	291	196	206	195	158	175	195	204.9
761	5932	5681	6064	6127	5927	5931	6148	6234	5989	6263	6029.6	213	216	205	292	196	206	199	159	175	195	205.6
762	5960	5700	6087	6145	5953	5947	6180	6264	6008	6298	6054.2	216	216	205	297	196	206	199	160	176	195	206.6
763	5979	5729	6112	6162	5983	5973	6201	6285	6028	6316	6076.8	217	217	205	299	197	206	200	160	179	196	207.6
764	5993	5754	6134	6194	6005	5991	6234	6308	6043	6335	6099.1	217	216	206	302	197	206	201	160	182	196	208.3
765	6006	5777	6154	6217	6020	6016	6260	6337	6066	6354	6120.7	217	217	207	302	198	207	202	160	183	196	208.9
766	6029	5797	6174	6239	6046	6045	6283	6358	6078	6381	6143	217	216	208	302	199	206	201	161	183	197	209
767	6056	5814	6198	6264	6077	6061	6305	6381	6092	6404	6165.2	218	217	207	305	199	206	201	161	183	198	209.5
768	6067	5834	6222	6286	6106	6085	6331	6399	6107	6430	6186.7	216	219	208	307	202	207	201	162	183	200	210.5
769	6095	5864	6242	6307	6117	6111	6356	6431	6129	6459	6211.1	215	219	211	307	203	205	202	163	186	202	211.3
770	6125	5889	6266	6324	6139	6132	6391	6451	6153	6487	6235.7	215	221	211	308	206	205	203	163	188	202	212.2
771	6153	5902	6291	6344	6164	6156	6419	6473	6185	6515	6260.2	216	221	210	309	207	204	203	163	188	202	212.3
772	6176	5930	6312	6370	6189	6176	6442	6490	6217	6545	6284.7	216	221	210	312	208	204	204	163	188	202	212.8
773	6201	5954	6341	6403	6208	6193	6463	6515	6244	6569	6309.1	216	221	211	312	208	204	204	165	192	204	213.7
774	6220	5981	6360	6433	6231	6214	6493	6536	6260	6589	6331.7	217	221	211	312	209	203	204	165	194	204	214
775	6253	6019	6380	6466	6253	6233	6517	6558	6284	6614	6357.7	217	224	212	313	212	203	205	165	195	205	215.1
776	6267	6038	6404	6487	6275	6252	6538	6585	6303	6643	6379.2	217	224	212	313	215	203	206	166	195	204	215.5
777	6294	6053	6432	6502	6296	6286	6557	6612	6327	6678	6403.7	218	224	215	313	216	204	207	167	194	205	216.3
778	6326	6073	6459	6529	6329	6302	6584	6637	6350	6695	6428.4	219	224	215	313	217	202	209	168	195	205	216.7
779	6348	6102	6480	6547	6355	6326	6607	6663	6369	6722	6451.9	219	227	217	313	218	203	209	169	194	205	217.4
780	6368	6123	6504	6581	6377	6344	6629	6700	6392	6749	6476.7	219	229	217	313	220	203	210	169	194	205	217.9
781	6397	6152	6531	6603	6393	6371	6658	6722	6411	6767	6500.5	219	231	218	313	221	203	211	170	194	206	218.6
782	6418	6175	6548	6628	6426	6384	6684	6761	6440	6789	6525.3	219	232	219	315	223	203	213	171	194	207	219.6
783	6447	6194	6573	6653	6444	6412	6701	6777	6465	6814	6548	220	233	219	316	226	203	213	173	195	207	220.5
784	6466	6221	6592	6669	6472	6439	6730	6800	6496	6840	6572.5	220	233	219	316	226	203	216	174	196	208	221.1
785	6491	6245	6624	6691	6494	6464	6760	6825	6510	6869	6597.3	220	233	221	318	226	206	216	175	197	207	221.9
786	6505	6263	6647	6723	6524	6485	6784	6854	6539	6890	6621.4	220	233	222	318	226	206	216	175	198	207	222.1
787	6541	6292	6672	6754	6552	6501	6806	6881	6570	6920	6648.9	221	233	223	319	226	209	218	176	198	208	223.1
788	6569	6313	6687	6779	6577	6523	6832	6901	6598	6940	6671.9	221	234	222	322	226	210	220	176	200	208	223.9
789	6595	6339	6714	6809	6605	6552	6866	6932	6620	6959	6699.1	222	235	221	322	228	210	222	176	200	209	224.5
790	6625	6363	6738	6834	6624	6573	6887	6952	6651	6976	6722.3	222	235	223	326	228	209	223	176	201	207	225
791	6647	6384	6757	6855	6650	6588	6907	6983	6677	7008	6745.6	222	235	223	327	229	210	221	177	202	206	225.2
792	6665	6405	6780	6883	6672	6616	6931	7014	6705	7027	6769.8	222	236	223	327	229	210	221	178	203	207	225.6
793	6693	6427	6809	6918	6702	6644	6954	7045	6736	7053	6798.1	221	237	223	332	229	210	222	178	204	212	226.8
794	6714	6453	6823	6932	6723	6669	6983	7066	6761	7094	6821.8	221	237	223	332	230	210	223	180	204	213	227.3
795	6740	6481	6845	6964	6745	6696	7014	7088	6786	7118	6847.7	223	237	224	332	230	210	224	182	204	213	227.9
796	6761	6498	6865	6994	6765	6716	7036	7110	6813	7150	6870.8	224	238	225	332	230	210	226	182	205	214	228.6
797	6784	6519	6888	7023	6794	6738	7069	7140	6835	7179	6896.9	224	239	224	332	230	210	228	182	205	215	228.9
798	6796	6545	6909	7044	6817	6770	7096	7170	6857	7189	6919.3	224	239	224	332	230	213	227	183	205	215	229.2
799	6823	6578	6938	7082	6843	6806	7128	7193	6879	7210	6948	224	241	225	333	230	213	227	183	205	215	229.6
800	6851	6606	6964	7107	6878	6832	7153	7222	6917	7240	6977	223	243	226	334	231	213	226	184	205	215	230
801	6876	6630	7003	7130	6912	6857	7184	7253	6941	7268	7005.4	224	245	228	335	232	213	225	184	205	216	230.7
802	6904	6647	7035	7149	6936	6889	7211	7281	6969	7291	7031.2	225	245	228	334	234	213	226	184	205	216	231
803	6943	6683	7066	7176	6974	6927	7235	7318	7001	7317	7064	226	246	226	336	234	213	227	184	205	216	231.3
804	6974	6696	7093	7202	7003	6956	7259	7346	7016	7336	7088.1	227	248	226	337	234	214	228	185	205	216	232
805	7009	6728	7134	7231	7035	6976	7289	7369	7048	7362	7118.1	227	248	226	342	235	215	230	186	207	217	233.3
806	7033	6750	7166	7254	7063	7004	7318	7406	7064	7390	7144.8	227	250	227	343	238	216	230	186	207	217	234.1
807	7068	6778	7199	7278	7097	7038	7351	7437	7098	7419	7176.3	229	251	227	343	241	216	232	187	209	217	235.2
808	7103	6804	7228	7293	7121	7065	7376	7456	7122	7448	7201.6	230	255	227	345	241	216	232	188	210	217	236.1
809	7125	6824	7262	7318	7154	7094	7404	7491	7147	7467	7228.6	230	254	227	346	242	216	235	188	211	218	236.7
810	7142	6860	7284	7347	7175	7123	7429	7519	7176	7492	7254.7	231	255	226	347	242	216	237	190	210	220	237.4
811	7170	6879	7314	7370	7199	7139	7464	7554	7203	7522	7281.4	231	255	226	347	243	217	240	189	210	222	238
812	7195	6906	7336	7402	7222	7167	7498	7575	7237	7548	7308.6	232	257	227	347	247	219	241	189	211	222	239.2
813	7225	6937	7371	7441	7247	7192	7533	7605	7263	7569	7338.3	233	257	228	349	248	221	241	190	212	224	240.3
814	7241	6962	7404	7458	7270	7230	7567	7622	7292	7595	7364.1	237	257	228	350	248	221	241	191	212	225	241
815	7267	6992	7425	7493	7296	7255	7588	7649	7323	7610	7389.8	241	259	228	350	248	223	242	190	212	229	242.2
816	7302	7019	7460	7511	7325	7290	7619	7685	7351	7638	7420	243	262	231	353	248	223	244	190	213	231	243.8
817	7338	7047	7497	7542	7347	7320	7646	7715	7391	7667	7451	246	261	234	355	250	223	243	190	215	231	244.8
818	7366	7076	7529	7565	7371	7345	7673	7748	7425	7694	7479.2	247	262	235	356	250	223	242	190	215	232	245.2
819	7386	7103	7555	7594	7401	7375	7701	7775	7452	7722	7506.4	247	264	235	357	249	225	243	190	217	233	246
820	7406	7126	7586	7635	7434	7403	7737	7804	7474	7756	7536.1	248	264	236	358	249	225	243	192	217	234	246.6
821	7446	7158	7615	7664	7460	7432	7765	7837	7504	7785	7566.6	249	265	236	359	250	225	243	194	218	234	247.3
822	7477	7183	7638	7693	7489	7466	7792	7874	7528	7802	7594.2	250	265	236	362	250	225	243	194	218	233	247.6
823	7513	7216	7668	7725	7514	7492	7825	7907	7571	7830	7626.1	250	266	238	363	252	225	243	195	219	234	248.5
824	7543	7240	7693	7751	7531	7523	7861	7927	7603	7862	7653.4	250	266	237	364	253	225	245	196	219	236	249.1
825	7566	7279	7719	7788	7562	7547	7891	7943	7625	7892	7681.2	251	267	238	365	255	226	247	196	219	236	250
826	7601	7305	7742	7813	7593	7563	7925	7963	7655	7923	7708.3	253	268	238	366	256	227	249	196	219	236	250.8
827	7635	7336	7770	7846	7613	7579	7946	7995	7679	7956	7735.5	254	268	241	366	256	228	250	197	219	238	251.7
828	7665	7360	7796	7883	7646	7604	7983	8033	7711	7991	7767.2	256	268	242	368	256	228	252	197	219	239	252.5
829	7697	7381	7835	7919	7665	7643	8021	8067	7750	8010	7798.8	257	269	243	370	260	228	254	198	221	239	253.9
830	7736	7412	7860	7951	7687	7672	8045	8094	7784	8042	7828.3	258	269	243	371	260	228	254	199	222	239	254.3
831	7764	7441	7891	7982	7726	7698	8076	8121	7810	8078	7858.7	259	270	243	371	260	230	256	200	222	240	255.1
832	7801	7466	7920	8008	7753	7727	8102	8159	7842	8103	7888.1	262	271	243	371	260	231	257	200	223	240	255.8
833	7825	7495	7953	8042	7783	7754	8134	8192	7878	8139	7919.5	263	272	242	372	261	234	257	200	224	240	256.5
834	7860	7525	7985	8069	7813	7781	8164	8218	7914	8172	7950.1	265	272	247	372	262	237	257	201	224	241	257.8
835	7892	7549	8018	8103	7838	7814	8187	8248	7948	8206	7980.3	266	272	247	375	263	238	257	202	224	241	258.5
836	7922	7573	8042	8151	7861	7849	8225	8279	7974	8226	8010.2	268	272	247	377	264	241	257	203	225	240	259.4
837	7954	7615	8082	8189	7894	7881	8253	8303	8015	8254	8044	268	272	249	383	266	243	257	203	226	242	260.9
838	7981	7652	8124	8219	7915	7920	8290	8329	8043	8283	8075.6	268	272	250	385	267	243	257	203	226	243	261.4
839	8011	7673	8157	8248	7935	7948	8319	8364	8065	8311	8103.1	268	270	250	390	268	244	256	203	227	244	262
840	8037	7694	8185	8280	7964	7983	8340	8402	8090	8348	8132.3	269	271	251	391	268	247	256	204	226	246	262.9
841	8064	7729	8211	8308	7995	8001	8378	8436	8123	8375	8162	269	272	253	393	269	248	256	205	228	248	264.1
842	8094	7757	8237	8335	8022	8029	8404	8475	8156	8400	8190.9	269	274	254	395	270	249	256	206	229	249	265.1
843	8140	7791	8270	8374	8044	8059	8435	8509	8189	8427	8223.8	270	275	254	397	271	251	255	210	231	249	266.3
844	8166	7818	8299	8401	8070	8092	8463	8535	8221	8452	8251.7	272	276	254	398	272	252	258	211	232	250	267.5
845	8194	7849	8329	8431	8100	8121	8492	8569	8247	8484	8281.6	274	277	255	401	274	254	258	212	232	251	268.8
846	8239	7891	8359	8453	8124	8155	8533	8602	8278	8518	8315.2	276	279	255	403	276	254	260	212	233	252	270
847	8269	7911	8391	8476	8150	8184	8561	8634	8299	8554	8342.9	279	282	256	406	276	255	261	212	233	253	271.3
848	8302	7944	8418	8511	8173	8213	8601	8665	8331	8600	8375.8	278	283	257	409	276	258	261	213	233	253	272.1
849	8336	7972	8448	8546	8196	8251	8635	8702	8364	8643	8409.3	280	284	259	410	276	258	262	214	234	252	272.9
850	8371	8004	8475	8571	8226	8287	8670	8742	8397	8674	8441.7	281	285	259	411	276	260	263	215	234	253	273.7
851	8393	8038	8511	8612	8262	8324	8701	8776	8430	8711	8475.8	281	287	262	411	277	263	263	215	234	253	274.6
852	8424	8058	8536	8630	8283	8355	8723	8809	8467	8746	8503.1	283	289	262	411	278	263	264	217	234	254	275.5
853	8456	8084	8566	8659	8324	8386	8746	8836	8498	8782	8533.7	283	290	262	411	278	267	265	219	234	253	276.2
854	8479	8117	8587	8690	8354	8420	8776	8867	8530	8809	8562.9	285	290	261	414	279	268	266	218	234	253	276.8
855	8502	8151	8611	8731	8380	8454	8807	8902	8561	8841	8594	284	291	262	417	283	271	265	220	236	255	278.4
856	8538	8183	8631	8756	8404	8483	8842	8930	8590	8870	8622.7	287	295	264	418	285	271	265	220	236	255	279.6
857	8575	8221	8673	8785	8434	8523	8882	8954	8617	8902	8656.6	287	297	266	419	285	271	264	220	236	255	280
858	8598	8250	8700	8815	8463	8556	8910	8984	8645	8942	8686.3	288	298	268	420	285	273	266	221	237	255	281.1
859	8617	8287	8735	8843	8488	8590	8939	9015	8676	8978	8716.8	288	301	268	420	285	277	265	222	238	259	282.3
860	8646	8325	8770	8872	8523	8621	8968	9053	8713	9004	8749.5	290	301	269	419	286	278	266	222	238	260	282.9
861	8674	8356	8802	8907	8564	8661	8995	9083	8738	9048	8782.8	294	302	269	421	286	280	267	222	239	260	284
862	8705	8383	8839	8939	8590	8691	9026	9116	8781	9083	8815.3	294	303	268	423	288	281	270	222	240	261	285
863	8743	8407	8873	8976	8631	8728	9058	9143	8812	9121	8849.2	294	309	266	426	288	283	270	222	240	261	285.9
864	8774	8444	8897	9016	8660	8754	9105	9177	8844	9161	8883.2	297	310	267	430	288	286	270	225	240	263	287.6
865	8808	8484	8934	9048	8696	8790	9134	9211	8878	9197	8918	297	312	267	430	289	286	272	226	240	264	288.3
866	8841	8515	8959	9087	8730	8820	9160	9242	8913	9233	8950	297	313	268	429	289	286	274	227	242	264	288.9
867	8870	8548	8989	9121	8775	8853	9192	9281	8940	9260	8982.9	298	314	268	433	291	286	275	227	243	265	290
868	8906	8573	9023	9153	8808	8882	9224	9314	8978	9292	9015.3	298	314	272	436	292	288	276	228	243	268	291.5
869	8937	8597	9055	9189	8834	8915	9259	9349	9016	9320	9047.1	299	315	274	440	296	290	279	231	247	269	294
870	8969	8630	9081	9229	8864	8955	9285	9385	9043	9366	9080.7	299	314	274	442	297	291	279	232	252	270	295
871	8995	8660	9109	9257	8887	8983	9314	9430	9080	9400	9111.5	300	314	274	445	299	290	279	233	253	269	295.6
872	9035	8683	9146	9286	8919	9010	9351	9461	9105	9431	9142.7	300	313	274	446	299	291	284	233	256	270	296.6
873	9063	8716	9185	9330	8950	9043	9382	9495	9128	9464	9175.6	302	314	274	446	302	294	285	237	259	269	298.2
874	9088	8753	9222	9368	8981	9079	9412	9539	9158	9503	9210.3	304	317	275	446	302	294	286	239	259	271	299.3
875	9123	8785	9254	9402	9026	9121	9446	9579	9188	9543	9246.7	306	319	276	446	303	294	287	239	259	270	299.9
876	9156	8807	9296	9439	9058	9150	9481	9621	9231	9580	9281.9	307	319	276	447	303	298	288	239	259	270	300.6
877	9197	8845	9332	9479	9095	9189	9516	9659	9265	9615	9319.2	308	322	276	450	303	299	289	239	259	270	301.5
878	9229	8871	9373	9515	9123	9224	9549	9696	9305	9652	9353.7	310	323	276	449	303	300	289	239	259	270	301.8
879	9257	8904	9406	9543	9154	9260	9577	9734	9344	9689	9386.8	310	324	279	451	305	302	289	239	258	270	302.7
880	9292	8937	9449	9582	9190	9287	9602	9776	9369	9716	9420	312	324	281	451	307	302	291	239	260	272	303.9
881	9326	8974	9486	9620	9232	9308	9636	9809	9406	9754	9455.1	312	323	282	454	309	305	292	239	261	272	304.9
882	9361	9005	9523	9644	9265	9353	9671	9849	9440	9802	9491.3	312	324	283	455	310	307	292	239	261	272	305.5
883	9389	9032	9557	9687	9296	9389	9710	9886	9490	9839	9527.5	311	325	285	454	312	309	292	240	261	272	306.1
884	9420	9066	9587	9731	9337	9417	9741	9940	9526	9883	9564.8	311	325	291	456	313	309	291	239	263	272	307
885	9464	9100	9625	9768	9369	9454	9782	9983	9562	9911	9601.8	312	326	294	460	314	310	292	240	265	273	308.6
886	9489	9138	9657	9802	9408	9487	9821	10031	9602	9946	9638.1	314	328	295	463	315	313	291	243	266	272	310
887	9526	9166	9705	9829	9449	9518	9867	10072	9636	9989	9675.7	315	328	296	465	315	315	291	244	268	275	311.2
888	9561	9203	9734	9859	9483	9553	9903	10117	9677	10021	9711.1	316	328	299	464	317	315	292	246	271	277	312.5
889	9602	9235	9767	9904	9529	9586	9940	10156	9720	10058	9749.7	317	329	298	469	318	318	292	245	272	279	313.7
890	9634	9261	9802	9931	9561	9631	9974	10188	9765	10100	9784.7	320	330	301	473	319	319	293	244	273	283	315.5
891	9658	9300	9835	9975	9605	9672	10011	10231	9803	10132	9822.2	324	329	302	475	319	319	294	246	274	282	316.4
892	9704	9332	9871	10012	9634	9716	10045	10263	9832	10172	9858.1	325	331	303	476	320	321	294	247	274	283	317.4
893	9729	9378	9907	10052	9675	9751	10086	10291	9871	10220	9896	327	332	302	479	320	322	296	248	277	287	319
894	9768	9407	9940	10078	9710	9789	10118	10325	9901	10254	9929	326	332	302	482	322	322	295	247	276	289	319.3
895	9814	9456	10000	10116	9741	9836	10164	10364	9937	10295	9972.3	327	332	304	481	323	323	296	247	279	290	320.2
896	9848	9488	10031	10151	9771	9872	10200	10394	9977	10338	10007	327	334	303	483	325	325	295	249	281	291	321.3
897	9879	9524	10062	10189	9813	9905	10231	10436	10013	10386	10043.8	328	336	305	484	326	325	296	253	283	294	323
898	9917	9557	10095	10226	9852	9939	10270	10483	10056	10425	10082	328	337	304	486	329	325	296	254	285	295	323.9
899	9960	9598	10145	10264	9878	9967	10304	10525	10084	10469	10119.4	327	337	303	487	330	324	297	255	286	297	324.3
900	10016	9643	10191	10301	9912	9996	10347	10553	10127	10501	10158.7	329	338	305	492	330	323	298	257	286	299	325.7
901	10048	9684	10232	10324	9954	10040	10379	10578	10168	10541	10194.8	330	343	305	494	329	325	297	258	287	302	327
902	10080	9723	10290	10368	9993	10084	10411	10614	10204	10579	10234.6	331	344	307	495	333	325	300	259	287	302	328.3
903	10123	9786	10337	10404	10032	10101	10452	10644	10244	10623	10274.6	332	345	307	497	333	327	300	260	287	302	329
904	10158	9817	10380	10442	10065	10135	10499	10688	10293	10662	10313.9	333	348	307	499	334	326	301	263	288	303	330.2
905	10191	9848	10420	10474	10113	10173	10539	10733	10327	10718	10353.6	332	350	306	500	336	326	306	263	288	303	331
906	10232	9882	10452	10515	10144	10203	10587	10773	10362	10758	10390.8	336	350	305	503	336	326	307	264	288	303	331.8
907	10269	9904	10491	10560	10176	10244	10627	10811	10397	10800	10427.9	336	351	305	504	338	327	309	265	291	305	333.1
908	10309	9942	10536	10603	10217	10286	10677	10840	10429	10849	10468.8	338	350	306	504	339	327	309	266	291	307	333.7
909	10342	9990	10571	10643	10258	10322	10715	10884	10465	10896	10508.6	339	350	307	504	340	326	308	266	294	307	334.1
910	10381	10018	10620	10679	10294	10359	10756	10928	10507	10932	10547.4	339	351	308	504	340	326	312	266	294	308	334.8
911	10431	10056	10651	10713	10328	10403	10806	10972	10544	10973	10587.7	339	351	308	507	342	327	314	267	295	309	335.9
912	10463	10093	10690	10764	10374	10457	10848	11008	10583	11009	10628.9	339	351	311	509	345	328	315	269	295	310	337.2
913	10501	10130	10727	10798	10421	10496	10888	11051	10623	11053	10668.8	341	351	315	510	345	328	314	269	297	310	338
914	10548	10175	10774	10835	10457	10523	10941	11095	10659	11098	10710.5	343	352	318	514	345	329	317	269	297	311	339.5
915	10581	10210	10820	10877	10501	10570	10980	11133	10694	11145	10751.1	344	354	319	518	345	331	319	269	300	312	341.1
916	10623	10257	10851	10909	10526	10616	11026	11167	10729	11176	10788	345	356	321	517	346	331	318	271	301	314	342
917	10657	10293	10893	10952	10556	10651	11077	11204	10763	11228	10827.4	345	357	322	517	348	332	320	271	301	314	342.7
918	10691	10323	10925	10980	10601	10694	11116	11249	10803	11293	10867.5	346	359	324	520	348	332	320	272	301	318	344
919	10729	10367	10969	11009	10639	10739	11157	11310	10838	11323	10908	349	359	324	524	348	335	320	273	301	319	345.2
920	10757	10409	11012	11065	10675	10782	11193	11362	10881	11371	10950.7	348	362	325	526	349	336	321	273	302	321	346.3
921	10794	10453	11044	11107	10714	10821	11241	11395	10925	11419	10991.3	348	365	326	526	351	336	320	274	303	321	347
922	10839	10490	11089	11153	10754	10859	11297	11439	10965	11463	11034.8	350	368	326	527	351	336	320	274	304	322	347.8
923	10877	10536	11123	11212	10796	10907	11338	11476	11001	11517	11078.3	353	366	328	527	352	336	320	275	305	324	348.6
924	10916	10574	11171	11255	10853	10954	11380	11517	11049	11563	11123.2	357	366	328	528	355	335	322	277	306	325	349.9
925	10956	10617	11201	11294	10885	10993	11421	11565	11084	11606	11162.2	360	367	331	529	359	335	323	278	308	327	351.7
926	10998	10647	11244	11338	10924	11029	11463	11604	11130	11664	11204.1	360	367	332	529	361	335	323	278	309	329	352.3
927	11044	10688	11278	11370	10974	11068	11500	11661	11169	11708	11246	360	369	333	531	366	336	324	277	311	330	353.7
928	11087	10717	11316	11414	11008	11112	11539	11710	11212	11747	11286.2	363	369	334	535	367	337	323	277	313	329	354.7
929	11148	10759	11367	11449	11041	11147	11588	11756	11260	11790	11330.5	363	373	336	536	367	338	327	278	315	330	356.3
930	11190	10808	11417	11504	11092	11188	11632	11796	11310	11834	11377.1	364	373	335	539	371	338	330	278	315	330	357.3
931	11228	10851	11460	11551	11143	11233	11667	11851	11357	11880	11422.1	366	373	336	540	371	342	331	277	317	330	358.3
932	11266	10891	11496	11598	11190	11265	11712	11908	11397	11924	11464.7	371	375	335	540	372	344	332	279	318	331	359.7
933	11311	10925	11533	11639	11227	11310	11762	11969	11436	11970	11508.2	372	374	336	541	374	346	334	281	319	332	360.9
934	11361	10958	11572	11681	11263	11349	11814	12006	11485	12017	11550.6	373	375	338	544	375	346	335	281	319	334	362
935	11405	11002	11620	11726	11310	11389	11870	12061	11524	12052	11595.9	373	374	339	543	377	345	335	281	321	335	362.3
936	11440	11041	11655	11775	11359	11431	11915	12104	11570	12095	11638.5	374	373	340	544	378	345	335	283	323	338	363.3
937	11486	11079	11698	11809	11410	11474	11966	12148	11611	12145	11682.6	373	377	339	549	379	349	335	284	324	338	364.7
938	11548	11118	11740	11853	11450	11513	12016	12188	11650	12185	11726.1	372	377	341	550	380	351	336	284	325	338	365.4
939	11583	11146	11783	11894	11488	11561	12066	12241	11706	12246	11771.4	372	377	342	552	381	351	337	286	325	338	366.1
940	11618	11180	11829	11937	11541	11599	12099	12296	11743	12304	11814.6	374	377	343	553	381	353	339	287	325	337	366.9
941	11654	11217	11869	11986	11582	11644	12151	12340	11798	12346	11858.7	375	377	343	558	383	355	340	289	326	339	368.5
942	11691	11246	11925	12046	11622	11681	12189	12374	11843	12390	11900.7	379	376	345	558	385	356	342	290	326	339	369.6
943	11731	11286	11959	12077	11670	11720	12233	12415	11894	12434	11941.9	381	376	346	559	386	357	342	292	328	342	370.9
944	11772	11323	12001	12129	11714	11757	12284	12461	11939	12480	11986	382	378	346	559	386	358	343	292	329	342	371.5
945	11814	11361	12051	12177	11765	11797	12334	12503	11981	12527	12031	383	381	346	565	388	360	346	291	329	343	373.2
946	11848	11399	12092	12232	11816	11844	12372	12549	12023	12573	12074.8	387	381	349	569	388	362	346	291	332	343	374.8
947	11903	11439	12140	12272	11859	11876	12424	12611	12066	12622	12121.2	387	381	351	569	391	365	349	292	335	343	376.3
948	11942	11480	12184	12319	11906	11936	12481	12663	12121	12666	12169.8	390	381	351	569	393	365	351	293	336	343	377.2
949	11985	11523	12228	12381	11968	11974	12530	12717	12174	12711	12219.1	392	385	351	572	394	365	352	295	339	343	378.8
950	12026	11560	12277	12439	12018	12035	12580	12763	12231	12754	12268.3	392	386	352	574	395	366	356	297	343	343	380.4
951	12069	11604	12333	12501	12063	12082	12630	12809	12271	12800	12316.2	392	388	353	575	397	368	357	298	345	346	381.9
952	12113	11653	12368	12554	12095	12115	12671	12846	12318	12860	12359.3	393	390	354	576	397	368	357	300	349	347	383.1
953	12158	11697	12413	12595	12155	12170	12721	12895	12357	12910	12407.1	393	392	355	576	397	368	360	302	350	348	384.1
954	12204	11740	12459	12644	12191	12218	12774	12950	12399	12958	12453.7	393	398	356	580	397	369	361	302	350	350	385.6
955	12254	11794	12500	12692	12239	12274	12812	12997	12435	13010	12500.7	395	401	355	580	400	369	362	301	351	351	386.5
956	12292	11831	12557	12748	12280	12312	12862	13058	12492	13070	12550.2	394	401	356	580	401	369	362	305	351	350	386.9
957	12349	11875	12618	12812	12329	12351	12904	13105	12547	13116	12600.6	397	401	355	582	402	371	364	305	351	350	387.8
958	12398	11915	12676	12849	12376	12398	12957	13145	12604	13168	12648.6	398	403	355	582	402	372	363	306	351	351	388.3
959	12447	11978	12712	12901	12412	12448	13006	13188	12644	13227	12696.3	400	403	354	584	403	375	366	306	351	351	389.3
960	12496	12020	12748	12952	12468	12492	13043	13242	12696	13276	12743.3	403	404	356	586	404	375	367	307	351	354	390.7
961	12541	12072	12788	12995	12501	12542	13096	13290	12740	13322	12788.7	404	404	358	588	408	374	367	311	355	353	392.2
962	12592	12118	12838	13043	12541	12576	13139	13345	12781	13374	12834.7	405	405	359	589	412	374	369	311	356	354	393.4
963	12633	12172	12897	13090	12588	12634	13184	13382	12824	13414	12881.8	405	405	359	595	413	375	371	311	356	356	394.6
964	12685	12211	12951	13142	12637	12688	13242	13434	12876	13462	12932.8	408	404	360	596	413	376	371	313	355	356	395.2
965	12740	12257	12987	13188	12677	12725	13302	13471	12937	13516	12980	408	409	362	596	414	377	372	315	356	358	396.7
966	12787	12299	13024	13238	12727	12765	13363	13523	12988	13582	13029.6	409	410	362	596	416	381	373	317	360	359	398.3
967	12833	12357	13072	13286	12776	12823	13428	13572	13044	13640	13083.1	410	411	364	597	423	382	373	316	363	359	399.8
968	12896	12405	13121	13336	12833	12880	13494	13621	13097	13688	13137.1	410	411	365	599	424	384	374	319	363	360	400.9
969	12947	12457	13155	13381	12898	12934	13547	13680	13145	13732	13187.6	410	411	367	601	425	384	374	319	365	363	401.9
970	13000	12506	13196	13450	12959	12996	13600	13734	13200	13788	13242.9	411	413	369	604	425	385	377	321	367	362	403.4
971	13054	12547	13253	13497	13006	13040	13649	13791	13235	13847	13291.9	411	416	369	605	430	384	379	321	369	365	404.9
972	13114	12596	13311	13555	13062	13101	13709	13840	13269	13910	13346.7	414	417	371	605	431	388	380	322	369	367	406.4
973	13157	12645	13369	13595	13112	13149	13758	13897	13336	13964	13398.2	415	419	372	609	435	390	380	323	370	369	408.2
974	13197	12693	13435	13645	13155	13203	13817	13955	13390	14009	13449.9	415	422	372	609	437	391	380	324	371	369	409
975	13253	12733	13477	13705	13211	13253	13875	14011	13446	14054	13501.8	417	422	372	612	439	391	382	326	370	372	410.3
976	13298	12796	13555	13756	13258	13294	13921	14064	13516	14103	13556.1	417	423	374	615	442	394	383	327	370	374	411.9
977	13351	12843	13609	13804	13315	13340	13977	14124	13566	14156	13608.5	417	425	374	620	446	398	385	331	370	375	414.1
978	13407	12893	13666	13851	13351	13386	14040	14190	13622	14200	13660.6	420	429	373	622	447	398	389	331	372	377	415.8
979	13454	12956	13720	13911	13398	13442	14094	14239	13676	14244	13713.4	421	428	374	628	448	399	391	332	373	377	417.1
980	13500	13011	13787	13957	13459	13493	14159	14306	13724	14298	13769.4	422	430	376	629	449	399	394	333	373	378	418.3
981	13557	13083	13823	14014	13501	13557	14205	14357	13782	14344	13822.3	425	431	376	631	452	399	395	335	374	379	419.7
982	13612	13132	13878	14068	13553	13617	14259	14428	13834	14399	13878	428	432	375	634	454	400	400	335	378	379	421.5
983	13651	13175	13946	14133	13609	13661	14308	14486	13899	14448	13931.6	432	433	378	636	456	401	402	337	379	380	423.4
984	13715	13231	13997	14194	13661	13725	14365	14547	13954	14509	13989.8	434	433	381	640	457	401	402	336	378	384	424.6
985	13763	13283	14055	14267	13711	13778	14432	14591	14013	14567	14046	437	434	383	642	458	400	404	337	379	386	426
986	13805	13346	14117	14337	13753	13843	14485	14654	14053	14623	14101.6	439	433	385	644	459	400	407	338	381	388	427.4
987	13861	13398	14172	14409	13811	13900	14543	14701	14111	14696	14160.2	442	433	385	650	461	403	408	338	383	390	429.3
988	13905	13439	14224	14456	13858	13956	14594	14758	14174	14743	14210.7	443	438	385	650	462	405	411	339	384	393	431
989	13962	13504	14274	14503	13923	14013	14646	14812	14231	14780	14264.8	443	439	386	650	462	405	411	342	387	396	432.1
990	14024	13551	14327	14557	13981	14073	14699	14869	14285	14830	14319.6	443	440	387	653	464	406	417	346	387	401	434.4
991	14075	13607	14387	14614	14038	14130	14756	14924	14347	14887	14376.5	444	444	389	654	464	408	418	349	393	402	436.5
992	14144	13665	14434	14663	14099	14177	14812	14997	14414	14951	14435.6	445	446	392	658	467	410	420	349	393	405	438.5
993	14191	13714	14491	14718	14155	14215	14862	15042	14473	15020	14488.1	446	446	392	663	468	412	423	351	397	405	440.3
994	14250	13762	14541	14774	14209	14248	14921	15094	14539	15078	14541.6	449	447	394	667	468	416	425	353	399	406	442.4
995	14309	13838	14593	14831	14277	14304	14976	15159	14605	15142	14603.4	454	449	396	669	470	417	425	354	399	407	444
996	14355	13894	14642	14897	14333	14351	15034	15220	14667	15208	14660.1	454	450	395	673	473	420	425	355	400	407	445.2
997	14418	13940	14708	14951	14389	14408	15097	15283	14726	15263	14718.3	454	451	395	677	475	420	426	356	401	410	446.5
998	14477	13979	14776	15000	14452	14454	15144	15345	14777	15333	14773.7	454	452	396	681	479	423	428	356	402	413	448.4
999	14537	14025	14831	15055	14516	14500	15187	15408	14830	15392	14828.1	456	452	397	684	480	425	430	356	402	415	449.7
1000	14567	14056	14873	15091	14553	14543	15205	15431	14872	15427	14861.8	456	454	397	693	482	424	430	356	402	418	451.2
1001	14599	14082	14914	15127	14591	14583	15236	15469	14907	15468	14897.6	458	457	399	694	486	424	432	357	404	422	453.3
1002	14634	14118	14942	15158	14619	14617	15262	15499	14937	15522	14930.8	459	456	401	698	486	424	433	358	405	423	454.3
1003	14664	14142	14977	15202	14650	14653	15299	15530	14980	15562	14965.9	460	458	401	702	487	426	434	359	407	426	456
1004	14698	14165	15009	15236	14685	14689	15333	15565	15017	15598	14999.5	463	458	402	703	488	426	435	359	408	426	456.8
1005	14742	14198	15039	15274	14721	14735	15378	15602	15055	15639	15038.3	464	460	402	704	490	428	435	359	409	426	457.7
1006	14782	14232	15068	15315	14751	14766	15422	15644	15088	15673	15074.1	463	462	403	705	492	429	435	360	408	426	458.3
1007	14835	14268	15105	15346	14793	14803	15458	15679	15118	15714	15111.9	465	462	405	705	495	432	436	362	408	427	459.7
1008	14864	14308	15161	15387	14835	14841	15514	15714	15158	15748	15153	465	465	406	709	498	432	437	361	408	428	460.9
1009	14910	14348	15199	15422	14859	14881	15556	15750	15194	15779	15189.8	465	466	407	711	499	433	437	361	408	429	461.6
1010	14947	14379	15236	15483	14903	14910	15595	15796	15229	15827	15230.5	468	470	408	714	500	434	436	361	411	430	463.2
1011	14981	14427	15268	15526	14940	14949	15643	15833	15283	15855	15270.5	469	471	409	716	503	434	437	362	413	432	464.6
1012	15018	14468	15308	15563	14974	14986	15671	15881	15311	15886	15306.6	471	473	410	719	503	435	437	363	413	432	465.6
1013	15063	14507	15345	15605	15021	15025	15703	15921	15356	15926	15347.2	472	476	411	724	504	436	439	364	414	432	467.2
1014	15099	14540	15377	15660	15065	15051	15758	15959	15401	15977	15388.7	473	478	415	724	506	437	441	366	415	432	468.7
1015	15137	14586	15427	15704	15098	15097	15789	15984	15440	16010	15427.2	475	478	416	725	509	438	441	368	415	431	469.6
1016	15189	14625	15469	15759	15129	15144	15844	16030	15480	16049	15471.8	478	481	417	725	509	439	441	370	416	430	470.6
1017	15241	14661	15519	15805	15159	15189	15894	16083	15514	16097	15516.2	481	481	418	728	510	440	441	370	418	430	471.7
1018	15276	14697	15563	15856	15210	15238	15945	16130	15566	16142	15562.3	485	480	419	732	511	440	440	371	418	429	472.5
1019	15314	14736	15597	15907	15253	15280	15997	16177	15616	16197	15607.4	488	481	420	733	511	441	442	373	419	429	473.7
1020	15361	14791	15649	15952	15308	15326	16051	16215	15662	16252	15656.7	488	482	421	735	511	443	444	374	422	429	474.9
1021	15413	14830	15702	15987	15352	15362	16085	16272	15706	16306	15701.5	491	484	422	741	513	445	444	374	423	430	476.7
1022	15456	14869	15749	16031	15386	15416	16125	16318	15756	16360	15746.6	493	485	422	740	514	445	445	374	424	430	477.2
1023	15501	14910	15798	16071	15438	15455	16170	16363	15802	16426	15793.4	494	493	421	742	515	446	448	375	427	431	479.2
1024	15543	14960	15842	16126	15478	15501	16218	16413	15851	16476	15840.8	495	493	424	743	517	447	450	375	428	431	480.3
1025	15593	15009	15881	16183	15523	15548	16252	16458	15901	16518	15886.6	496	493	424	744	518	448	451	376	431	433	481.4
1026	15638	15050	15927	16239	15568	15604	16306	16510	15939	16575	15935.6	496	497	426	745	520	449	451	376	433	436	482.9
1027	15688	15099	15984	16277	15620	15654	16351	16558	15996	16644	15987.1	501	497	427	746	523	450	451	376	434	437	484.2
1028	15727	15150	16025	16337	15668	15695	16398	16617	16052	16701	16037	504	499	431	749	524	455	451	377	434	439	486.3
1029	15776	15200	16084	16387	15727	15750	16454	16673	16097	16755	16090.3	503	499	436	753	524	455	454	380	433	442	487.9
1030	15825	15247	16142	16446	15772	15805	16506	16733	16149	16811	16143.6	503	501	437	755	526	458	454	380	434	443	489.1
1031	15874	15298	16192	16501	15825	15870	16565	16800	16195	16868	16198.8	505	502	438	758	525	459	454	381	434	443	489.9
1032	15911	15357	16248	16552	15860	15941	16611	16863	16244	16930	16251.7	506	505	439	761	525	460	454	383	434	443	491
1033	15959	15392	16300	16597	15904	15985	16654	16928	16289	16990	16299.8	508	506	442	766	527	461	456	384	435	443	492.8
1034	15996	15437	16349	16646	15970	16034	16707	16986	16332	17042	16349.9	508	510	446	768	528	462	458	385	436	445	494.6
1035	16053	15492	16414	16703	16025	16104	16764	17036	16404	17085	16408	511	514	448	775	531	464	465	384	436	448	497.6
1036	16103	15548	16463	16740	16066	16159	16815	17103	16461	17130	16458.8	516	520	449	777	534	467	466	386	437	448	500
1037	16163	15599	16511	16793	16120	16213	16861	17166	16514	17197	16513.7	519	523	451	778	534	470	468	389	438	448	501.8
1038	16231	15645	16576	16860	16177	16273	16928	17215	16569	17262	16573.6	520	523	451	780	537	471	471	389	440	449	503.1
1039	16292	15697	16624	16903	16236	16318	16971	17277	16624	17327	16626.9	520	525	457	782	541	472	471	389	440	449	504.6
1040	16343	15750	16679	16954	16282	16366	17031	17332	16665	17386	16678.8	522	525	461	784	542	477	471	388	442	449	506.1
1041	16401	15796	16721	17011	16327	16423	17078	17398	16719	17448	16732.2	524	525	462	788	544	477	474	390	444	449	507.7
1042	16463	15851	16781	17064	16366	16480	17135	17445	16789	17503	16787.7	524	527	467	791	545	482	475	391	446	449	509.7
1043	16514	15911	16840	17119	16427	16544	17201	17501	16851	17564	16847.2	524	532	470	793	547	482	476	392	448	450	511.4
1044	16555	15959	16892	17170	16492	16610	17258	17557	16910	17629	16903.2	528	532	473	794	547	483	477	393	449	450	512.6
1045	16613	16004	16954	17236	16552	16666	17305	17607	16970	17679	16958.6	529	534	475	795	548	487	478	394	450	451	514.1
1046	16679	16063	17000	17289	16606	16720	17360	17671	17021	17740	17014.9	529	534	475	796	548	492	483	395	451	452	515.5
1047	16737	16127	17045	17336	16667	16790	17431	17715	17081	17805	17073.4	530	536	477	799	550	494	485	395	456	454	517.6
1048	16778	16175	17102	17408	16733	16847	17488	17774	17121	17853	17127.9	530	539	479	801	552	495	487	396	457	454	519
1049	16832	16232	17154	17465	16782	16901	17549	17833	17169	17920	17183.7	527	540	480	806	556	499	487	397	458	455	520.5
1050	16888	16287	17218	17513	16838	16954	17600	17896	17230	17955	17237.9	526	543	480	808	557	501	489	397	459	458	521.8
1051	16936	16335	17285	17571	16896	17022	17667	17957	17297	18011	17297.7	528	544	481	811	557	502	491	397	462	459	523.2
1052	16998	16391	17348	17627	16947	17078	17720	18017	17357	18057	17354	530	547	483	817	559	504	494	401	466	460	526.1
1053	17059	16450	17397	17688	16995	17148	17786	18082	17415	18120	17414	534	549	484	821	559	503	495	405	466	460	527.6
1054	17111	16502	17451	17747	17058	17207	17852	18139	17465	18182	17471.4	532	551	484	824	564	507	497	404	466	461	529
1055	17172	16557	17512	17806	17118	17258	17912	18209	17523	18253	17532	533	553	485	824	567	510	500	405	467	465	530.9
1056	17230	16614	17561	17868	17180	17314	17965	18256	17580	18308	17587.6	534	554	488	826	569	512	500	408	467	469	532.7
1057	17281	16684	17636	17939	17253	17375	18025	18320	17652	18368	17653.3	536	558	492	829	571	515	501	409	471	470	535.2
1058	17324	16749	17700	17990	17297	17439	18067	18382	17701	18433	17708.2	536	562	497	831	572	515	501	412	474	474	537.4
1059	17397	16812	17766	18044	17349	17487	18122	18449	17774	18496	17769.6	538	566	499	834	573	518	502	412	473	475	539
1060	17452	16869	17842	18101	17412	17552	18187	18508	17848	18559	17833	541	566	500	837	578	518	503	414	474	475	540.6
1061	17506	16931	17901	18157	17478	17617	18249	18574	17897	18612	17892.2	543	567	502	839	579	520	506	415	476	477	542.4
1062	17565	16996	17942	18216	17535	17685	18307	18641	17958	18674	17951.9	546	567	503	840	581	521	508	415	478	478	543.7
1063	17630	17053	18015	18271	17583	17754	18357	18707	18005	18741	18011.6	547	573	504	845	583	522	509	417	479	481	546
1064	17680	17113	18086	18339	17648	17824	18436	18787	18072	18803	18078.8	547	575	504	851	585	525	511	415	481	481	547.5
1065	17740	17164	18160	18409	17705	17887	18507	18843	18137	18864	18141.6	547	578	506	852	588	526	515	417	482	483	549.4
1066	17796	17211	18214	18478	17759	17947	18583	18907	18195	18942	18203.2	551	580	507	852	588	527	518	420	481	485	550.9
1067	17854	17274	18278	18527	17820	18018	18641	18986	18246	19014	18265.8	551	582	510	856	592	528	523	421	485	488	553.6
1068	17919	17330	18353	18587	17889	18073	18706	19037	18303	19078	18327.5	552	582	512	858	591	532	525	422	486	489	554.9
1069	17987	17375	18412	18648	17949	18130	18768	19105	18376	19135	18388.5	553	584	515	860	592	537	526	427	487	491	557.2
1070	18048	17436	18473	18705	17998	18175	18821	19175	18439	19205	18447.5	554	584	520	860	597	543	526	428	489	496	559.7
1071	18119	17502	18531	18773	18072	18250	18877	19238	18516	19273	18515.1	555	585	522	862	600	544	527	430	489	497	561.1
1072	18189	17564	18590	18837	18130	18328	18936	19316	18576	19350	18581.6	557	586	523	867	604	546	528	430	493	500	563.4
1073	18259	17631	18683	18906	18195	18387	18994	19378	18655	19416	18650.4	557	587	525	871	608	548	529	431	496	502	565.4
1074	18327	17697	18757	18968	18251	18439	19063	19451	18735	19488	18717.6	557	588	530	876	609	551	530	430	499	506	567.6
1075	18392	17767	18839	19025	18301	18512	19137	19521	18815	19561	18787	561	589	531	878	611	555	530	431	503	511	570
1076	18464	17830	18904	19092	18363	18582	19206	19582	18879	19639	18854.1	562	593	533	879	615	554	532	435	505	514	572.2
1077	18507	17893	18971	19147	18428	18655	19281	19645	18939	19695	18916.1	564	595	535	883	614	555	532	437	505	516	573.6
1078	18575	17949	19026	19226	18501	18708	19347	19717	19003	19769	18982.1	568	597	537	888	615	558	532	438	508	519	576
1079	18653	18002	19100	19307	18576	18766	19416	19802	19092	19852	19056.6	569	601	539	891	619	557	532	439	510	521	577.8
1080	18725	18072	19164	19385	18619	18848	19496	19867	19147	19921	19124.4	571	603	543	891	619	559	535	438	512	522	579.3
1081	18802	18144	19225	19468	18679	18913	19575	19937	19205	19990	19193.8	573	604	545	896	622	563	536	437	513	523	581.2
1082	18870	18227	19290	19521	18749	18979	19648	20009	19267	20058	19261.8	573	607	547	898	625	565	538	440	515	524	583.2
1083	18941	18295	19344	19580	18809	19043	19714	20089	19320	20121	19325.6	575	608	547	901	628	565	538	440	518	525	584.5
1084	19020	18354	19419	19650	18872	19108	19795	20160	19383	20199	19396	575	610	549	903	631	566	538	441	519	524	585.6
1085	19068	18419	19498	19713	18933	19186	19867	20233	19439	20253	19460.9	576	613	550	905	633	566	540	443	521	525	587.2
1086	19139	18478	19566	19787	18994	19251	19937	20304	19493	20319	19526.8	576	612	550	911	632	566	542	443	525	528	588.5
1087	19197	18543	19654	19853	19060	19315	20012	20373	19559	20391	19595.7	577	614	553	914	636	569	544	444	527	531	590.9
1088	19264	18618	19728	19909	19137	19375	20080	20447	19630	20463	19665.1	578	614	554	917	640	571	544	447	529	535	592.9
1089	19333	18675	19799	19986	19194	19440	20164	20508	19707	20534	19734	579	617	554	920	646	571	545	448	531	537	594.8
1090	19407	18748	19872	20057	19272	19520	20235	20592	19787	20610	19810	580	620	554	921	647	574	546	448	534	539	596.3
1091	19489	18824	19951	20122	19350	19592	20309	20670	19855	20673	19883.5	580	620	556	921	648	577	549	451	535	540	597.7
1092	19549	18896	20019	20185	19424	19657	20379	20744	19928	20748	19952.9	581	622	556	921	651	576	552	452	535	543	598.9
1093	19611	18955	20088	20237	19479	19718	20460	20818	19990	20815	20017.1	585	620	556	921	655	579	552	456	535	544	600.3
1094	19685	19022	20153	20317	19547	19784	20537	20900	20052	20903	20090	585	623	556	924	657	581	552	458	537	548	602.1
1095	19741	19091	20240	20400	19629	19849	20607	20970	20121	20971	20161.9	587	623	562	924	659	584	555	459	539	552	604.4
1096	19802	19159	20310	20472	19723	19916	20685	21046	20195	21044	20235.2	591	623	564	925	660	586	558	460	543	556	606.6
1097	19860	19235	20375	20542	19798	19980	20762	21102	20271	21128	20305.3	597	624	567	932	658	588	559	466	545	557	609.3
1098	19941	19304	20453	20612	19863	20055	20847	21198	20338	21222	20383.3	601	629	567	935	661	592	561	467	547	559	611.9
1099	20006	19371	20519	20684	19934	20128	20909	21278	20412	21301	20454.2	607	630	568	938	666	596	561	468	547	560	614.1
1100	20087	19427	20580	20752	20003	20191	20983	21353	20487	21374	20523.7	608	633	568	944	667	599	563	473	548	565	616.8
1101	20160	19490	20656	20826	20079	20253	21058	21437	20561	21451	20597.1	612	634	573	948	667	603	564	474	548	564	618.7
1102	20231	19564	20720	20899	20155	20330	21142	21521	20643	21519	20672.4	616	639	576	957	669	603	563	476	548	564	621.1
1103	20296	19649	20788	20961	20236	20423	21233	21596	20724	21614	20752	619	641	577	958	670	605	564	478	551	568	623.1
1104	20365	19718	20845	21042	20304	20478	21320	21680	20791	21708	20825.1	623	644	577	964	671	605	566	484	550	568	625.2
1105	20442	19798	20925	21120	20378	20546	21390	21750	20878	21800	20902.7	626	644	582	967	675	609	567	485	552	570	627.7
1106	20521	19872	21004	21181	20467	20627	21477	21825	20965	21891	20983	629	645	584	973	675	611	570	488	554	571	630
1107	20587	19964	21078	21268	20549	20713	21569	21883	21043	21976	21063	631	647	587	976	677	611	570	489	557	578	632.3
1108	20652	20040	21159	21338	20625	20796	21637	21957	21106	22050	21136	633	648	587	978	678	611	573	491	558	579	633.6
1109	20738	20114	21238	21419	20690	20875	21708	22031	21182	22127	21212.2	635	649	589	977	677	611	576	498	560	580	635.2
1110	20833	20182	21301	21508	20765	20950	21787	22125	21269	22178	21289.8	637	653	592	981	680	612	578	499	560	584	637.6
1111	20909	20262	21374	21584	20839	21030	21860	22199	21352	22243	21365.2	638	656	595	984	681	614	580	498	561	584	639.1
1112	20997	20337	21447	21673	20909	21092	21941	22276	21431	22313	21441.6	642	661	594	989	685	617	581	498	563	586	641.6
1113	21070	20393	21516	21739	20986	21166	22026	22337	21510	22395	21513.8	645	662	594	994	687	623	584	502	565	585	644.1
1114	21148	20457	21593	21813	21070	21241	22106	22418	21593	22468	21590.7	646	665	595	996	689	630	589	502	565	589	646.6
1115	21243	20539	21685	21882	21143	21316	22189	22495	21677	22551	21672	648	669	595	1001	691	632	590	503	568	593	649
1116	21318	20606	21774	21960	21232	21393	22276	22570	21734	22622	21748.5	652	671	597	1004	693	635	591	504	568	595	651
1117	21390	20680	21853	22052	21319	21467	22364	22645	21805	22706	21828.1	655	671	597	1007	695	638	592	506	572	597	653
1118	21470	20763	21930	22144	21391	21546	22448	22729	21865	22801	21908.7	655	674	601	1012	699	640	596	507	579	599	656.2
1119	21549	20842	22021	22224	21475	21639	22515	22819	21952	22879	21991.5	658	677	601	1014	704	641	598	510	583	602	658.8
1120	21627	20923	22093	22322	21553	21729	22571	22889	22043	22973	22072.3	661	681	601	1017	705	643	601	510	587	603	660.9
1121	21696	20988	22174	22413	21630	21804	22637	22980	22121	23043	22148.6	663	683	601	1019	706	648	604	512	588	603	662.7
1122	21777	21051	22244	22494	21713	21903	22719	23052	22212	23112	22227.7	665	687	603	1021	710	649	604	514	589	608	665
1123	21851	21127	22308	22563	21803	21995	22800	23124	22282	23184	22303.7	669	688	607	1026	715	649	607	516	594	609	668
1124	21922	21212	22385	22642	21888	22095	22904	23201	22369	23264	22388.2	671	692	609	1026	716	650	609	517	594	613	669.7
1125	22013	21283	22466	22729	21983	22166	22986	23287	22450	23351	22471.4	673	693	610	1029	719	653	612	518	598	615	672
1126	22111	21365	22562	22817	22066	22237	23073	23366	22525	23424	22554.6	677	694	613	1030	723	656	615	523	599	616	674.6
1127	22208	21448	22644	22901	22129	22320	23169	23445	22593	23507	22636.4	679	698	616	1031	724	662	616	525	602	621	677.4
1128	22283	21516	22737	22993	22218	22401	23274	23528	22679	23590	22721.9	680	700	619	1033	724	664	617	525	602	622	678.6
1129	22368	21595	22823	23102	22299	22488	23346	23606	22760	23678	22806.5	682	701	623	1038	725	666	619	525	603	623	680.5
1130	22448	21672	22917	23189	22382	22562	23438	23706	22849	23766	22892.9	685	704	629	1041	728	668	622	526	606	626	683.5
1131	22538	21762	22981	23272	22477	22646	23532	23804	22932	23870	22981.4	685	705	632	1043	733	671	627	527	608	626	685.7
1132	22620	21837	23058	23359	22552	22735	23630	23888	23021	23981	23068.1	688	705	631	1051	736	671	630	537	610	628	688.7
1133	22705	21915	23161	23437	22643	22816	23702	23980	23104	24072	23153.5	692	707	633	1055	738	672	632	542	615	629	691.5
1134	22779	21997	23247	23528	22722	22909	23789	24067	23175	24158	23237.1	695	709	633	1064	739	675	633	543	622	631	694.4
1135	22869	22101	23337	23615	22800	23003	23881	24159	23259	24267	23329.1	697	710	636	1065	739	676	634	546	624	634	696.1
1136	22970	22179	23432	23688	22878	23079	23981	24242	23346	24365	23416	698	711	642	1069	739	678	637	547	626	636	698.3
1137	23058	22262	23533	23771	22960	23171	24069	24332	23449	24447	23505.2	697	713	643	1069	745	678	641	548	631	636	700.1
1138	23122	22364	23616	23851	23031	23251	24139	24430	23530	24519	23585.3	698	715	644	1076	748	680	641	550	634	640	702.6
1139	23206	22447	23719	23942	23109	23315	24238	24517	23636	24600	23672.9	700	716	648	1079	753	682	643	552	635	642	705
1140	23294	22524	23814	24047	23198	23396	24333	24613	23711	24684	23761.4	704	720	650	1081	755	684	644	551	638	641	706.8
1141	23368	22609	23902	24140	23284	23474	24413	24697	23807	24772	23846.6	707	720	653	1081	760	687	645	555	640	641	708.9
1142	23458	22698	23996	24219	23370	23566	24491	24781	23914	24869	23936.2	706	726	655	1083	764	690	646	555	640	639	710.4
1143	23552	22779	24086	24301	23452	23650	24567	24878	24009	24953	24022.7	712	729	656	1084	767	694	651	555	641	642	713.1
1144	23626	22872	24185	24406	23535	23732	24650	24967	24112	25035	24112	716	731	656	1087	769	696	654	556	642	644	715.1
1145	23722	22958	24275	24489	23631	23793	24724	25081	24205	25127	24200.5	716	737	658	1090	770	699	658	559	643	645	717.5
1146	23807	23032	24358	24594	23720	23884	24825	25179	24291	25221	24291.1	720	739	660	1097	771	703	662	561	646	645	720.4
1147	23895	23107	24455	24696	23798	23956	24922	25264	24379	25326	24379.8	725	742	663	1098	773	704	664	562	648	649	722.8
1148	23973	23192	24534	24797	23883	24051	25022	25365	24474	25423	24471.4	731	744	663	1099	774	707	665	563	651	652	724.9
1149	24068	23276	24607	24888	23985	24138	25119	25463	24569	25519	24563.2	735	749	666	1101	780	705	666	563	653	660	727.8
1150	24147	23376	24715	24989	24091	24223	25217	25575	24677	25613	24662.3	737	752	670	1104	786	707	671	564	656	664	731.1
1151	24230	23464	24800	25070	24182	24319	25316	25681	24773	25713	24754.8	741	753	673	1106	788	707	674	567	658	667	733.4
1152	24301	23543	24888	25168	24257	24420	25406	25774	24862	25797	24841.6	744	759	674	1111	789	710	675	568	661	670	736.1
1153	24406	23644	24976	25255	24335	24527	25508	25846	24961	25877	24933.5	751	762	675	1120	795	709	679	571	664	671	739.7
1154	24489	23734	25072	25344	24432	24620	25600	25940	25058	25980	25026.9	754	765	676	1125	797	711	685	573	663	675	742.4
1155	24559	23816	25144	25427	24531	24713	25696	26027	25157	26100	25117	756	766	676	1126	801	713	691	574	666	676	744.5
1156	24647	23889	25236	25527	24615	24801	25794	26124	25266	26198	25209.7	759	769	679	1128	805	716	691	576	670	680	747.3
1157	24757	23975	25331	25611	24709	24905	25877	26215	25341	26291	25301.2	761	771	679	1134	806	720	701	578	674	682	750.6
1158	24839	24059	25406	25708	24792	25000	25984	26308	25429	26381	25390.6	766	773	684	1137	812	720	702	581	677	686	753.8
1159	24945	24142	25508	25798	24890	25061	26076	26410	25512	26475	25481.7	768	776	688	1141	814	723	704	582	680	691	756.7
1160	25050	24241	25591	25884	24989	25163	26171	26517	25622	26555	25578.3	769	779	689	1144	818	729	706	586	683	693	759.6
1161	25138	24326	25683	25973	25095	25250	26258	26616	25739	26669	25674.7	771	781	690	1148	823	732	711	588	688	698	763
1162	25238	24416	25787	26079	25170	25355	26338	26713	25822	26750	25766.8	772	787	693	1154	829	736	714	591	689	700	766.5
1163	25321	24507	25887	26194	25257	25457	26427	26813	25938	26852	25865.3	778	788	694	1161	831	739	721	591	695	703	770.1
1164	25416	24594	25984	26295	25349	25548	26526	26905	26028	26964	25960.9	780	793	697	1163	836	742	724	591	696	707	772.9
1165	25509	24676	26080	26399	25450	25634	26619	27013	26113	27065	26055.8	780	795	702	1172	840	744	727	591	698	709	775.8
1166	25617	24752	26173	26511	25543	25717	26721	27130	26212	27176	26155.2	781	798	704	1177	843	745	729	591	702	708	777.8
1167	25717	24839	26279	26614	25632	25776	26817	27230	26293	27265	26246.2	784	802	707	1178	843	746	731	594	703	712	780
1168	25806	24939	26376	26709	25733	25861	26900	27319	26380	27370	26339.3	785	803	709	1182	846	748	734	593	708	715	782.3
1169	25895	25039	26473	26800	25809	25952	26996	27430	26464	27446	26430.4	789	807	711	1188	847	753	739	593	709	719	785.5
1170	25998	25129	26554	26899	25883	26059	27105	27533	26551	27540	26525.1	791	810	715	1196	851	756	740	594	711	721	788.5
1171	26091	25218	26639	27017	25973	26158	27193	27619	26644	27633	26618.5	791	816	717	1199	853	757	743	596	715	727	791.4
1172	26171	25305	26728	27105	26060	26250	27292	27726	26747	27732	26711.6	794	822	716	1201	856	758	748	596	721	731	794.3
1173	26263	25385	26838	27187	26153	26341	27405	27824	26856	27826	26807.8	796	823	721	1205	860	758	755	596	723	731	796.8
1174	26349	25482	26948	27282	26229	26441	27502	27939	26934	27912	26901.8	799	829	724	1208	862	760	756	599	727	734	799.8
1175	26444	25559	27030	27395	26314	26541	27602	28019	27027	27995	26992.6	805	831	725	1212	864	764	757	600	730	732	802
1176	26559	25648	27116	27508	26406	26630	27687	28108	27118	28081	27086.1	806	834	731	1218	865	764	759	601	731	734	804.3
1177	26640	25740	27195	27597	26503	26718	27773	28202	27224	28167	27175.9	812	835	732	1228	868	766	764	602	736	737	808
1178	26725	25823	27273	27695	26593	26807	27866	28285	27331	28246	27264.4	816	838	733	1230	873	768	766	604	739	739	810.6
1179	26817	25915	27373	27789	26677	26893	27961	28368	27423	28341	27355.7	821	840	735	1231	877	770	767	609	740	738	812.8
1180	26911	26023	27485	27885	26783	27005	28073	28457	27525	28452	27459.9	830	840	736	1232	879	770	769	613	743	740	815.2
1181	27001	26118	27590	27996	26882	27098	28181	28550	27625	28544	27558.5	830	840	738	1237	887	773	775	615	746	745	818.6
1182	27096	26211	27679	28085	26987	27167	28273	28655	27719	28636	27650.8	837	843	739	1244	894	777	777	615	750	748	822.4
1183	27177	26299	27773	28197	27084	27259	28373	28743	27816	28732	27745.3	841	845	740	1249	894	779	782	616	754	753	825.3
1184	27260	26392	27879	28292	27186	27376	28468	28840	27917	28845	27845.5	844	849	741	1253	896	788	786	619	756	760	829.2
1185	27347	26473	27964	28377	27281	27469	28555	28928	28013	28923	27933	846	850	745	1260	898	788	789	620	757	760	831.3
1186	27441	26531	28045	28477	27371	27581	28661	29048	28094	29031	28028	849	854	750	1266	901	790	791	620	757	759	833.7
1187	27523	26632	28143	28575	27466	27680	28752	29128	28188	29124	28121.1	851	855	753	1275	901	792	794	622	757	763	836.3
1188	27608	26714	28244	28678	27553	27777	28837	29224	28290	29225	28215	853	855	756	1285	902	794	795	622	757	767	838.6
1189	27700	26803	28330	28764	27656	27884	28927	29314	28375	29328	28308.1	853	857	758	1293	904	797	796	625	758	769	841
1190	27797	26867	28425	28861	27748	27981	29021	29403	28464	29420	28398.7	856	859	765	1298	907	802	797	627	759	770	844
1191	27895	26969	28519	28965	27846	28063	29091	29484	28563	29492	28488.7	860	864	770	1304	910	806	801	629	761	774	847.9
1192	27965	27053	28593	29067	27929	28164	29183	29591	28655	29594	28579.4	860	865	772	1310	915	811	802	635	763	775	850.8
1193	28078	27134	28679	29152	28013	28284	29302	29695	28734	29701	28677.2	863	870	773	1319	918	811	804	640	765	777	854
1194	28162	27240	28776	29244	28095	28368	29408	29797	28830	29806	28772.6	864	871	774	1323	920	816	806	641	768	778	856.1
1195	28249	27338	28895	29339	28179	28479	29501	29886	28948	29918	28873.2	865	873	780	1329	923	820	809	646	771	783	859.9
1196	28348	27428	28974	29438	28265	28560	29591	29992	29056	30011	28966.3	866	875	781	1339	930	825	813	647	774	788	863.8
1197	28440	27516	29083	29521	28368	28637	29672	30087	29158	30129	29061.1	873	874	787	1341	935	832	816	646	779	789	867.2
1198	28533	27594	29195	29613	28461	28737	29763	30196	29236	30216	29154.4	876	875	792	1348	939	833	816	649	780	790	869.8
1199	28622	27683	29284	29706	28557	28857	29854	30305	29331	30318	29251.7	876	877	797	1355	943	833	819	651	782	795	872.8
1200	28700	27772	29369	29817	28633	28967	29963	30403	29431	30412	29346.7	880	881	801	1365	945	839	821	652	784	800	876.8
1201	28796	27853	29475	29904	28749	29076	30067	30509	29537	30509	29447.5	882	886	802	1376	949	841	822	656	786	804	880.4
1202	28886	27922	29578	30015	28838	29179	30186	30621	29636	30605	29546.6	884	888	804	1383	955	846	826	662	788	804	884
1203	28991	28007	29680	30115	28930	29278	30281	30723	29733	30709	29644.7	886	891	806	1388	959	851	829	664	791	804	886.9
1204	29094	28103	29783	30232	29038	29380	30384	30828	29827	30808	29747.7	888	890	809	1393	962	854	833	665	792	805	889.1
1205	29179	28186	29887	30323	29134	29473	30502	30921	29939	30925	29846.9	889	891	810	1396	965	856	839	665	794	808	891.3
1206	29272	28282	29982	30414	29246	29567	30588	31044	30046	31042	29948.3	891	895	811	1400	965	859	843	666	798	809	893.7
1207	29360	28381	30076	30512	29335	29675	30686	31158	30128	31139	30045	894	898	814	1406	969	862	843	668	799	810	896.3
1208	29460	28475	30192	30623	29443	29778	30771	31266	30213	31267	30148.8	896	903	818	1409	970	865	842	668	801	811	898.3
1209	29568	28576	30300	30731	29541	29867	30877	31362	30303	31380	30250.5	897	907	819	1415	977	866	844	671	803	813	901.2
1210	29678	28661	30407	30842	29642	29977	30984	31461	30406	31495	30355.3	903	913	820	1417	980	870	842	672	805	813	903.5
1211	29787	28765	30490	30939	29732	30064	31080	31562	30520	31605	30454.4	905	915	828	1423	984	877	844	675	810	816	907.7
1212	29880	28860	30605	31042	29822	30159	31184	31683	30625	31707	30556.7	904	919	828	1424	989	877	846	676	812	818	909.3
1213	29968	28970	30705	31137	29903	30272	31287	31764	30718	31801	30652.5	911	923	832	1429	994	878	848	678	813	821	912.7
1214	30065	29076	30789	31231	30003	30376	31411	31859	30811	31914	30753.5	913	925	835	1432	996	881	851	680	813	825	915.1
1215	30169	29171	30887	31313	30100	30487	31506	31982	30916	32031	30856.2	915	927	836	1440	998	882	852	682	814	825	917.1
1216	30267	29261	31000	31430	30205	30594	31610	32099	31008	32145	30961.9	918	927	839	1445	1001	884	857	684	814	826	919.5
1217	30370	29358	31103	31512	30299	30686	31711	32215	31120	32259	31063.3	918	929	841	1448	1003	885	859	687	815	829	921.4
1218	30446	29444	31209	31630	30378	30783	31830	32327	31221	32376	31164.4	921	935	845	1451	1003	889	862	690	815	830	924.1
1219	30538	29550	31313	31746	30470	30882	31937	32439	31324	32472	31267.1	927	940	847	1449	1005	888	862	687	818	834	925.7
1220	30651	29659	31432	31853	30577	30986	32045	32548	31436	32584	31377.1	931	945	858	1454	1011	895	866	690	818	835	930.3
1221	30738	29768	31537	31948	30675	31095	32146	32658	31549	32696	31481	931	947	862	1458	1013	898	868	691	820	836	932.4
1222	30829	29873	31628	32046	30778	31208	32250	32765	31655	32813	31584.5	934	949	865	1463	1018	898	867	692	822	837	934.5
1223	30933	29989	31738	32145	30891	31317	32353	32867	31753	32939	31692.5	938	953	866	1465	1022	902	872	692	822	842	937.4
1224	31037	30089	31855	32257	30979	31400	32477	32970	31849	33050	31796.3	941	953	865	1468	1028	904	877	695	829	847	940.7
1225	31140	30168	31947	32355	31092	31492	32583	33084	31966	33174	31900.1	942	960	868	1472	1030	905	880	697	832	850	943.6
1226	31262	30265	32059	32475	31203	31586	32690	33185	32067	33286	32007.8	944	962	869	1480	1038	906	882	697	833	853	946.4
1227	31387	30345	32165	32586	31287	31682	32781	33315	32163	33407	32111.8	947	966	871	1483	1042	906	888	701	835	857	949.6
1228	31523	30451	32282	32686	31395	31783	32903	33416	32275	33534	32224.8	947	969	872	1484	1042	908	889	709	840	859	951.9
1229	31634	30544	32417	32778	31501	31911	33026	33548	32406	33660	32342.5	948	975	875	1490	1044	912	890	714	843	862	955.3
1230	31726	30655	32535	32887	31607	32024	33136	33658	32498	33767	32449.3	949	982	876	1491	1047	916	890	717	846	866	958
1231	31838	30768	32658	32989	31721	32115	33230	33784	32600	33868	32557.1	950	987	882	1495	1050	917	894	718	846	868	960.7
1232	31932	30868	32777	33087	31832	32226	33335	33910	32709	33985	32666.1	954	990	885	1498	1054	922	897	719	850	869	963.8
1233	32031	30985	32891	33181	31946	32340	33436	34026	32833	34090	32775.9	958	993	888	1503	1060	922	899	719	856	870	966.8
1234	32154	31089	33019	33293	32049	32446	33537	34142	32951	34197	32887.7	963	992	893	1510	1066	926	902	720	857	871	970
1235	32269	31207	33124	33409	32154	32541	33647	34280	33078	34315	33002.4	964	996	898	1513	1066	928	904	723	864	871	972.7
1236	32374	31296	33236	33524	32268	32650	33766	34392	33180	34425	33111.1	968	1003	904	1518	1067	932	905	727	867	873	976.4
1237	32475	31409	33355	33631	32376	32761	33889	34501	33309	34543	33224.9	970	1004	905	1522	1070	936	908	728	868	875	978.6
1238	32579	31510	33451	33750	32478	32871	34003	34637	33425	34659	33336.3	969	1002	909	1525	1073	941	910	733	870	874	980.6
1239	32704	31624	33567	33848	32592	32992	34121	34770	33551	34789	33455.8	972	1001	909	1526	1077	943	917	733	872	877	982.7
1240	32814	31733	33686	33971	32725	33101	34252	34896	33659	34902	33573.9	973	1008	912	1530	1081	948	919	737	874	879	986.1
1241	32931	31857	33803	34104	32841	33207	34368	35015	33768	35006	33690	980	1010	915	1531	1083	952	919	741	875	882	988.8
1242	33052	31973	33940	34225	32957	33324	34485	35142	33892	35143	33813.3	980	1015	917	1538	1084	960	921	743	880	882	992
1243	33166	32083	34046	34343	33070	33424	34595	35270	34006	35267	33927	981	1019	923	1544	1089	966	925	745	884	885	996.1
1244	33261	32208	34170	34450	33177	33523	34728	35396	34100	35399	34041.2	987	1021	927	1550	1091	966	929	745	888	888	999.2
1245	33396	32312	34275	34575	33268	33654	34848	35530	34215	35544	34161.7	992	1025	930	1557	1092	966	931	746	893	887	1001.9
1246	33499	32414	34421	34680	33381	33758	34956	35657	34341	35696	34280.3	998	1026	932	1564	1095	965	933	746	896	888	1004.3
1247	33597	32531	34538	34804	33494	33884	35087	35801	34456	35845	34403.7	999	1030	934	1568	1097	971	936	750	900	890	1007.5
1248	33727	32651	34645	34909	33610	33998	35198	35929	34584	35956	34520.7	999	1035	938	1570	1100	971	936	752	900	891	1009.2
1249	33838	32768	34790	35043	33733	34123	35323	36055	34694	36093	34646	1000	1039	940	1574	1106	973	943	751	905	893	1012.4
1250	33958	32875	34899	35152	33829	34236	35435	36195	34835	36211	34762.5	1003	1044	941	1574	1110	977	943	754	910	894	1015
1251	34086	32992	35045	35275	33945	34348	35572	36326	34943	36329	34886.1	1005	1049	941	1574	1112	978	948	755	914	895	1017.1
1252	34203	33114	35164	35390	34066	34476	35694	36439	35068	36451	35006.5	1009	1049	941	1577	1115	981	950	757	914	897	1019
1253	34346	33239	35296	35527	34215	34595	35824	36558	35191	36555	35134.6	1009	1053	943	1580	1119	984	953	759	916	900	1021.6
1254	34484	33362	35439	35642	34351	34719	35969	36685	35311	36703	35266.5	1012	1054	951	1586	1121	992	954	761	918	904	1025.3
1255	34603	33492	35562	35762	34497	34854	36110	36799	35446	36828	35395.3	1016	1058	953	1593	1128	999	958	767	922	905	1029.9
1256	34731	33602	35693	35879	34611	34971	36241	36921	35568	36950	35516.7	1019	1061	960	1600	1130	1000	966	766	923	911	1033.6
1257	34854	33721	35824	36011	34717	35104	36372	37047	35714	37069	35643.3	1022	1064	963	1606	1136	1000	968	770	926	917	1037.2
1258	34990	33840	35938	36142	34835	35232	36478	37186	35837	37206	35768.4	1025	1069	964	1611	1138	1001	975	774	928	925	1041
1259	35121	33948	36088	36273	34943	35354	36606	37327	35934	37344	35893.8	1027	1068	967	1613	1144	1006	980	778	930	928	1044.1
1260	35223	34083	36213	36393	35048	35473	36759	37460	36038	37484	36017.4	1028	1074	966	1618	1148	1010	982	782	932	936	1047.6
1261	35337	34206	36353	36515	35174	35581	36896	37605	36170	37608	36144.5	1029	1077	971	1624	1149	1010	983	787	934	940	1050.4
1262	35445	34333	36470	36641	35317	35698	37031	37740	36301	37750	36272.6	1034	1080	973	1628	1148	1015	987	790	934	942	1053.1
1263	35569	34468	36608	36769	35455	35817	37146	37880	36428	37887	36402.7	1039	1081	974	1633	1146	1020	986	794	939	946	1055.8
1264	35714	34587	36740	36914	35584	35946	37271	38014	36559	38019	36534.8	1041	1085	975	1635	1149	1023	990	798	940	952	1058.8
1265	35851	34729	36872	37056	35715	36078	37404	38166	36660	38127	36665.8	1041	1090	977	1638	1151	1031	995	800	944	957	1062.4
1266	35982	34839	36999	37206	35831	36208	37535	38296	36774	38271	36794.1	1039	1096	978	1643	1153	1036	1001	801	949	961	1065.7
1267	36101	34968	37113	37352	35963	36334	37674	38448	36900	38387	36924	1045	1098	987	1648	1157	1043	1002	803	951	963	1069.7
1268	36230	35082	37270	37483	36085	36472	37809	38577	37049	38508	37056.5	1047	1105	986	1653	1160	1048	1003	805	953	969	1072.9
1269	36351	35207	37417	37626	36226	36591	37953	38739	37184	38656	37195	1048	1108	988	1661	1161	1053	1009	811	958	973	1077
1270	36472	35332	37564	37768	36359	36706	38092	38861	37316	38803	37327.3	1054	1109	990	1668	1167	1055	1009	812	961	977	1080.2
1271	36595	35451	37692	37890	36497	36850	38222	39009	37457	38930	37459.3	1060	1108	993	1675	1169	1058	1013	812	963	981	1083.2
1272	36726	35579	37820	38019	36614	36978	38345	39116	37596	39076	37586.9	1065	1110	995	1682	1174	1061	1019	814	966	989	1087.5
1273	36845	35706	37956	38180	36745	37101	38475	39278	37746	39209	37724.1	1072	1116	998	1689	1181	1061	1023	820	969	997	1092.6
1274	36987	35848	38086	38324	36883	37251	38616	39427	37885	39356	37866.3	1077	1121	1001	1695	1188	1069	1024	822	973	1000	1097
1275	37123	35949	38228	38460	37022	37371	38752	39585	38009	39498	37999.7	1081	1124	1011	1701	1191	1074	1027	825	978	1002	1101.4
1276	37274	36068	38363	38612	37152	37515	38890	39740	38152	39634	38140	1085	1127	1015	1707	1190	1076	1029	828	982	1005	1104.4
1277	37401	36197	38501	38730	37268	37640	39004	39907	38298	39756	38270.2	1089	1129	1017	1709	1194	1085	1034	827	984	1011	1107.9
1278	37537	36331	38647	38845	37408	37779	39137	40073	38430	39907	38409.4	1089	1135	1018	1718	1196	1087	1035	828	987	1017	1111
1279	37679	36463	38780	38986	37553	37897	39285	40202	38567	40093	38550.5	1092	1141	1019	1726	1198	1091	1038	829	988	1028	1115
1280	37819	36595	38950	39128	37698	38022	39437	40336	38692	40223	38690	1096	1147	1021	1728	1200	1104	1043	836	992	1028	1119.5
1281	37943	36713	39080	39256	37843	38161	39587	40477	38822	40366	38824.8	1098	1154	1023	1735	1204	1108	1049	839	991	1031	1123.2
1282	38090	36842	39225	39405	37988	38282	39737	40606	38957	40515	38964.7	1104	1158	1027	1740	1212	1111	1051	842	993	1031	1126.9
1283	38210	36962	39381	39549	38132	38395	39883	40745	39102	40663	39102.2	1106	1161	1032	1743	1213	1117	1055	844	996	1033	1130
1284	38335	37092	39520	39687	38250	38532	40044	40883	39233	40807	39238.3	1107	1168	1036	1749	1221	1124	1061	845	1000	1035	1134.6
1285	38484	37220	39645	39817	38388	38657	40188	41031	39385	40967	39378.2	1111	1173	1036	1756	1227	1128	1062	848	1001	1038	1138
1286	38613	37335	39790	39966	38546	38817	40328	41176	39527	41101	39519.9	1115	1177	1038	1762	1230	1138	1067	852	1008	1042	1142.9
1287	38770	37468	39907	40122	38692	38939	40504	41315	39689	41256	39666.2	1117	1184	1040	1774	1236	1145	1071	857	1011	1044	1147.9
1288	38911	37587	40063	40261	38846	39104	40685	41470	39835	41415	39817.7	1123	1189	1043	1777	1240	1147	1075	856	1018	1047	1151.5
1289	39041	37721	40219	40419	38993	39252	40830	41616	39981	41561	39963.3	1129	1195	1050	1777	1248	1148	1081	857	1022	1055	1156.2
1290	39196	37874	40355	40556	39124	39382	40969	41762	40123	41693	40103.4	1130	1200	1050	1778	1250	1152	1083	860	1022	1058	1158.3
1291	39341	38015	40505	40693	39252	39551	41155	41885	40250	41837	40248.4	1137	1202	1053	1782	1258	1151	1092	863	1031	1059	1162.8
1292	39505	38168	40658	40843	39397	39675	41320	42039	40387	41995	40398.7	1144	1207	1057	1785	1265	1157	1095	866	1036	1063	1167.5
1293	39653	38324	40798	41004	39535	39837	41499	42189	40513	42162	40551.4	1145	1216	1059	1793	1270	1161	1096	875	1039	1069	1172.3
1294	39819	38456	40941	41166	39685	39987	41670	42338	40682	42305	40704.9	1148	1218	1063	1805	1271	1163	1100	880	1044	1070	1176.2
1295	39972	38584	41098	41330	39837	40144	41832	42492	40828	42456	40857.3	1151	1221	1066	1817	1275	1165	1105	883	1044	1071	1179.8
1296	40118	38739	41233	41485	39989	40274	41990	42645	40980	42611	41006.4	1151	1223	1068	1824	1281	1173	1109	888	1048	1073	1183.8
1297	40228	38884	41376	41624	40156	40433	42145	42794	41137	42747	41152.4	1156	1226	1073	1830	1287	1175	1112	890	1049	1074	1187.2
1298	40372	39036	41526	41764	40268	40582	42303	42951	41297	42887	41298.6	1156	1229	1080	1831	1293	1180	1115	895	1051	1079	1190.9
1299	40508	39199	41673	41909	40416	40738	42451	43069	41451	43069	41448.3	1159	1230	1084	1840	1295	1183	1119	900	1053	1082	1194.5
1300	40654	39354	41833	42052	40551	40894	42599	43225	41579	43231	41597.2	1163	1230	1087	1847	1300	1185	1123	904	1053	1085	1197.7
1301	40794	39505	41996	42192	40705	41041	42740	43391	41738	43379	41748.1	1165	1231	1091	1853	1309	1188	1126	906	1054	1089	1201.2
1302	40940	39650	42149	42364	40853	41199	42894	43563	41889	43537	41903.8	1171	1237	1093	1860	1314	1192	1132	908	1059	1095	1206.1
1303	41083	39819	42281	42516	40991	41335	43050	43739	42034	43704	42055.2	1175	1239	1099	1869	1318	1196	1134	913	1063	1097	1210.3
1304	41242	39968	42417	42685	41136	41494	43216	43904	42193	43841	42209.6	1179	1237	1102	1871	1323	1198	1138	916	1067	1103	1213.4
1305	41411	40116	42575	42821	41278	41644	43396	44075	42335	43987	42363.8	1187	1241	1103	1876	1329	1202	1144	920	1070	1108	1218
1306	41576	40269	42714	42990	41445	41788	43551	44233	42493	44137	42519.6	1192	1244	1106	1878	1330	1204	1146	922	1074	1110	1220.6
1307	41752	40409	42870	43157	41602	41943	43698	44389	42678	44282	42678	1197	1248	1116	1889	1330	1205	1150	928	1076	1118	1225.7
1308	41910	40553	43012	43327	41775	42115	43864	44543	42845	44456	42840	1202	1252	1119	1896	1339	1213	1151	932	1082	1122	1230.8
1309	42056	40697	43177	43474	41930	42261	44023	44713	43004	44615	42995	1206	1260	1121	1903	1347	1217	1154	937	1084	1124	1235.3
1310	42192	40855	43323	43650	42068	42413	44186	44857	43157	44763	43146.4	1211	1263	1125	1913	1358	1218	1157	942	1092	1127	1240.6
1311	42360	40987	43503	43829	42234	42566	44347	45031	43329	44930	43311.6	1216	1268	1130	1921	1365	1220	1161	947	1095	1127	1245
1312	42541	41134	43646	44002	42370	42728	44509	45204	43470	45086	43469	1223	1273	1133	1927	1367	1220	1161	947	1102	1132	1248.5
1313	42703	41268	43830	44172	42538	42861	44652	45384	43602	45233	43624.3	1231	1277	1136	1927	1370	1223	1167	948	1105	1131	1251.5
1314	42861	41432	44009	44342	42692	43017	44821	45543	43768	45394	43787.9	1240	1281	1139	1935	1375	1227	1172	949	1114	1137	1256.9
1315	43028	41562	44174	44510	42842	43173	44981	45732	43946	45562	43951	1243	1283	1140	1941	1381	1231	1175	953	1119	1137	1260.3
1316	43192	41728	44325	44673	42988	43316	45137	45901	44117	45737	44111.4	1250	1295	1143	1947	1388	1234	1181	958	1124	1140	1266
1317	43342	41880	44486	44840	43135	43470	45302	46065	44283	45902	44270.5	1253	1297	1145	1951	1395	1238	1185	961	1127	1141	1269.3
1318	43511	42033	44643	45010	43291	43623	45454	46241	44465	46080	44435.1	1259	1299	1149	1954	1402	1243	1189	960	1132	1143	1273
1319	43663	42188	44795	45173	43443	43782	45608	46399	44604	46249	44590.4	1268	1303	1154	1959	1408	1248	1195	964	1133	1149	1278.1
1320	43817	42349	44938	45326	43593	43933	45784	46561	44770	46430	44750.1	1271	1308	1156	1973	1415	1254	1199	967	1134	1152	1282.9
1321	43970	42493	45102	45478	43749	44074	45907	46730	44960	46612	44907.5	1277	1313	1160	1978	1425	1261	1199	970	1139	1158	1288
1322	44140	42659	45252	45660	43908	44227	46076	46890	45138	46794	45074.4	1280	1320	1163	1982	1436	1263	1205	972	1144	1162	1292.7
1323	44294	42851	45438	45821	44075	44398	46223	47050	45333	46983	45246.6	1283	1328	1166	1991	1441	1268	1209	975	1150	1166	1297.7
1324	44444	42998	45619	45989	44267	44591	46369	47217	45507	47165	45416.6	1286	1334	1176	1998	1442	1271	1213	979	1150	1173	1302.2
1325	44620	43147	45771	46163	44418	44735	46540	47383	45682	47336	45579.5	1289	1336	1178	2011	1445	1273	1214	986	1157	1181	1307
1326	44776	43303	45938	46319	44602	44916	46710	47548	45859	47505	45747.6	1292	1346	1189	2019	1451	1280	1219	986	1162	1185	1312.9
1327	44943	43468	46079	46485	44750	45079	46875	47685	46004	47690	45905.8	1302	1353	1193	2025	1455	1282	1222	989	1165	1190	1317.6
1328	45135	43634	46244	46637	44905	45249	47036	47865	46170	47846	46072.1	1309	1352	1196	2031	1455	1286	1221	990	1171	1196	1320.7
1329	45309	43801	46413	46792	45086	45410	47205	48031	46327	48005	46237.9	1311	1350	1199	2039	1461	1292	1221	991	1176	1201	1324.1
1330	45482	43962	46586	46961	45252	45572	47385	48217	46485	48185	46408.7	1315	1356	1201	2053	1469	1295	1231	992	1178	1201	1329.1
1331	45656	44134	46734	47113	45418	45739	47564	48404	46662	48385	46580.9	1318	1363	1208	2059	1473	1297	1236	996	1179	1202	1333.1
1332	45809	44296	46907	47283	45552	45910	47763	48570	46812	48549	46745.1	1326	1364	1215	2067	1477	1300	1238	998	1182	1206	1337.3
1333	45983	44443	47071	47441	45723	46078	47945	48750	46985	48717	46913.6	1331	1369	1217	2076	1479	1305	1238	1005	1187	1209	1341.6
1334	46153	44604	47240	47618	45872	46242	48108	48928	47153	48895	47081.3	1337	1371	1223	2087	1485	1307	1244	1010	1193	1213	1347
1335	46340	44765	47405	47791	46028	46397	48294	49090	47304	49052	47246.6	1348	1380	1228	2096	1487	1308	1249	1009	1196	1214	1351.5
1336	46515	44948	47547	47960	46197	46569	48480	49277	47475	49223	47419.1	1355	1379	1229	2102	1488	1308	1249	1013	1203	1217	1354.3
1337	46680	45119	47713	48152	46367	46743	48654	49468	47655	49417	47596.8	1360	1384	1234	2106	1492	1317	1253	1020	1208	1218	1359.2
1338	46842	45312	47899	48374	46547	46926	48790	49650	47835	49570	47774.5	1363	1391	1236	2115	1496	1321	1260	1026	1211	1222	1364.1
1339	46986	45487	48075	48571	46712	47088	48969	49827	48032	49764	47951.1	1369	1395	1240	2127	1505	1320	1265	1029	1216	1230	1369.6
1340	47145	45636	48242	48768	46897	47280	49130	49976	48224	49921	48121.9	1377	1397	1242	2135	1507	1327	1267	1028	1219	1233	1373.2
1341	47289	45811	48441	48948	47066	47456	49308	50137	48407	50084	48294.7	1379	1399	1243	2144	1512	1330	1277	1032	1226	1237	1377.9
1342	47464	45978	48617	49125	47227	47623	49485	50310	48585	50261	48467.5	1384	1404	1245	2153	1513	1335	1280	1035	1228	1240	1381.7
1343	47630	46147	48818	49324	47388	47789	49684	50473	48745	50434	48643.2	1392	1410	1247	2160	1520	1341	1282	1035	1234	1250	1387.1
1344	47814	46304	48989	49486	47563	47986	49831	50685	48908	50599	48816.5	1399	1416	1252	2165	1523	1340	1286	1040	1241	1253	1391.5
1345	47995	46461	49168	49655	47742	48166	50012	50872	49100	50745	48991.6	1403	1420	1254	2169	1527	1346	1291	1041	1245	1259	1395.5
1346	48133	46609	49338	49825	47907	48353	50195	51050	49297	50923	49163	1407	1421	1255	2175	1530	1350	1296	1043	1250	1263	1399
1347	48287	46800	49530	50020	48092	48544	50358	51226	49448	51100	49340.5	1408	1431	1259	2184	1535	1353	1301	1045	1253	1266	1403.5
1348	48442	46975	49716	50184	48267	48742	50524	51394	49610	51301	49515.5	1410	1435	1264	2189	1539	1359	1307	1044	1260	1270	1407.7
1349	48617	47171	49894	50380	48434	48916	50712	51566	49773	51495	49695.8	1413	1441	1273	2197	1545	1361	1313	1046	1266	1271	1412.6
1350	48801	47338	50090	50564	48598	49100	50918	51748	49946	51678	49878.1	1418	1445	1282	2203	1550	1365	1314	1049	1275	1275	1417.6
1351	48966	47510	50288	50741	48770	49288	51098	51947	50151	51865	50062.4	1426	1447	1286	2205	1551	1370	1321	1049	1282	1279	1421.6
1352	49142	47682	50479	50966	48949	49464	51277	52123	50349	52042	50247.3	1430	1455	1289	2210	1556	1373	1324	1052	1285	1283	1425.7
1353	49329	47838	50634	51143	49114	49645	51470	52306	50556	52206	50424.1	1434	1463	1292	2224	1565	1376	1329	1058	1290	1285	1431.6
1354	49509	47995	50808	51324	49290	49833	51658	52492	50726	52402	50603.7	1437	1470	1297	2234	1568	1380	1333	1060	1297	1288	1436.4
1355	49691	48147	50992	51500	49475	50021	51845	52679	50908	52579	50783.7	1446	1475	1301	2241	1571	1385	1335	1063	1303	1289	1440.9
1356	49859	48302	51205	51674	49644	50170	52027	52857	51102	52774	50961.4	1454	1482	1305	2252	1578	1391	1342	1067	1310	1289	1447
1357	50031	48487	51386	51833	49786	50360	52206	53043	51288	52951	51137.1	1458	1491	1308	2260	1584	1393	1345	1067	1313	1295	1451.4
1358	50216	48623	51581	52018	49967	50532	52395	53218	51469	53129	51314.8	1462	1495	1311	2267	1591	1398	1350	1070	1315	1299	1455.8
1359	50392	48807	51748	52207	50149	50696	52569	53395	51665	53317	51494.5	1466	1499	1316	2277	1596	1405	1358	1074	1323	1304	1461.8
1360	50577	48981	51957	52382	50330	50880	52761	53566	51866	53480	51678	1469	1509	1319	2288	1603	1408	1360	1077	1326	1304	1466.3
1361	50766	49152	52136	52583	50551	51072	52940	53737	52061	53696	51869.4	1475	1515	1329	2294	1608	1412	1362	1082	1331	1309	1471.7
1362	50951	49304	52332	52762	50717	51235	53141	53920	52237	53891	52049	1479	1518	1335	2304	1610	1417	1371	1085	1339	1321	1477.9
1363	51129	49476	52501	52969	50874	51411	53302	54102	52433	54050	52224.7	1483	1520	1344	2318	1616	1425	1378	1089	1342	1323	1483.8
1364	51339	49643	52675	53142	51069	51598	53489	54312	52627	54214	52410.8	1492	1525	1349	2329	1624	1432	1384	1089	1347	1324	1489.5
1365	51508	49846	52857	53342	51278	51781	53685	54478	52800	54363	52593.8	1501	1532	1355	2336	1627	1437	1392	1092	1350	1327	1494.9
1366	51692	50016	53038	53513	51444	51987	53875	54656	53006	54562	52778.9	1505	1537	1356	2342	1630	1442	1395	1096	1357	1331	1499.1
1367	51853	50183	53221	53706	51627	52173	54061	54863	53182	54751	52962	1513	1544	1363	2348	1633	1446	1402	1099	1361	1335	1504.4
1368	52039	50331	53404	53902	51771	52366	54222	55037	53391	54943	53140.6	1516	1549	1366	2357	1641	1449	1402	1103	1363	1340	1508.6
1369	52212	50493	53573	54072	51943	52520	54403	55239	53528	55134	53311.7	1525	1556	1373	2366	1647	1458	1399	1106	1366	1344	1514
1370	52374	50672	53762	54249	52092	52731	54579	55451	53701	55309	53492	1528	1558	1376	2372	1650	1460	1397	1108	1376	1347	1517.2
1371	52567	50816	53945	54421	52301	52913	54745	55634	53864	55490	53669.6	1532	1565	1381	2379	1654	1465	1399	1111	1382	1348	1521.6
1372	52731	51005	54132	54629	52507	53084	54922	55810	54044	55687	53855.1	1534	1570	1384	2390	1662	1469	1399	1112	1387	1354	1526.1
1373	52921	51170	54332	54808	52671	53281	55114	56000	54245	55875	54041.7	1539	1574	1392	2394	1669	1475	1402	1114	1390	1362	1531.1
1374	53112	51372	54538	55024	52866	53457	55304	56207	54427	56090	54239.7	1543	1576	1398	2399	1675	1480	1405	1115	1393	1367	1535.1
1375	53293	51565	54729	55184	53053	53649	55477	56413	54613	56275	54425.1	1548	1585	1406	2403	1680	1484	1413	1120	1396	1371	1540.6
1376	53456	51760	54916	55386	53237	53828	55681	56626	54806	56454	54615	1552	1588	1412	2406	1685	1488	1419	1124	1401	1373	1544.8
1377	53631	51933	55113	55555	53412	54024	55872	56814	54993	56658	54800.5	1556	1595	1417	2411	1691	1490	1424	1126	1405	1375	1549
1378	53808	52107	55317	55727	53579	54241	56064	57009	55170	56842	54986.4	1559	1599	1420	2420	1704	1499	1431	1128	1413	1379	1555.2
1379	53982	52287	55512	55914	53765	54445	56254	57224	55369	57011	55176.3	1558	1607	1419	2427	1706	1505	1435	1129	1417	1385	1558.8
1380	54182	52460	55699	56124	53934	54621	56474	57422	55560	57240	55371.6	1559	1613	1421	2435	1714	1509	1437	1134	1419	1386	1562.7
1381	54386	52651	55886	56307	54123	54827	56694	57630	55770	57470	55574.4	1570	1617	1427	2442	1722	1511	1442	1136	1425	1395	1568.7
1382	54569	52818	56069	56502	54330	55017	56885	57842	55939	57653	55762.4	1576	1625	1434	2459	1727	1513	1444	1142	1430	1402	1575.2
1383	54757	53001	56275	56668	54542	55215	57083	58066	56164	57865	55963.6	1579	1628	1438	2465	1730	1517	1449	1144	1434	1406	1579
1384	54933	53192	56472	56874	54720	55407	57284	58261	56347	58078	56156.8	1585	1632	1443	2470	1735	1522	1457	1146	1438	1406	1583.4
1385	55130	53374	56654	57046	54916	55590	57470	58476	56535	58275	56346.6	1584	1636	1445	2479	1737	1530	1462	1150	1442	1410	1587.5
1386	55304	53559	56847	57232	55102	55786	57646	58715	56718	58496	56540.5	1589	1636	1454	2483	1746	1533	1469	1152	1443	1415	1592
1387	55487	53743	57029	57441	55286	55970	57837	58914	56918	58705	56733	1596	1643	1457	2495	1755	1541	1475	1156	1445	1421	1598.4
1388	55663	53923	57241	57647	55485	56150	58031	59107	57134	58907	56928.8	1603	1655	1459	2505	1756	1546	1478	1157	1450	1433	1604.2
1389	55862	54095	57437	57843	55683	56351	58201	59296	57320	59133	57122.1	1610	1659	1464	2511	1755	1552	1485	1161	1454	1436	1608.7
1390	56028	54299	57641	58025	55902	56543	58388	59500	57495	59368	57318.9	1616	1663	1466	2517	1764	1559	1494	1161	1456	1440	1613.6
1391	56210	54492	57853	58202	56095	56727	58566	59724	57697	59559	57512.5	1619	1669	1472	2530	1769	1565	1501	1163	1458	1443	1618.9
1392	56404	54702	58051	58398	56252	56919	58764	59941	57915	59773	57711.9	1621	1672	1473	2535	1776	1568	1506	1163	1457	1446	1621.7
1393	56599	54862	58242	58584	56457	57137	58937	60168	58109	59974	57906.9	1627	1681	1478	2543	1781	1567	1514	1169	1462	1449	1627.1
1394	56808	55077	58443	58796	56666	57330	59152	60405	58282	60170	58112.9	1633	1690	1479	2554	1784	1575	1520	1175	1466	1452	1632.8
1395	56992	55271	58650	59015	56844	57535	59374	60641	58472	60397	58319.1	1641	1693	1483	2562	1787	1579	1528	1177	1473	1456	1637.9
1396	57174	55474	58860	59218	57045	57747	59592	60841	58680	60618	58524.9	1646	1695	1487	2572	1805	1582	1535	1180	1479	1462	1644.3
1397	57410	55668	59069	59424	57240	57945	59811	61056	58902	60834	58735.9	1655	1698	1495	2584	1812	1587	1538	1183	1483	1467	1650.2
1398	57592	55849	59259	59612	57467	58127	60010	61235	59095	61039	58928.5	1662	1705	1503	2591	1821	1586	1546	1188	1486	1471	1655.9
1399	57790	56040	59449	59816	57652	58340	60195	61436	59313	61226	59125.7	1665	1714	1512	2599	1829	1597	1554	1190	1489	1476	1662.5
1400	57996	56237	59654	60050	57845	58562	60407	61643	59521	61445	59336	1671	1719	1518	2605	1838	1605	1556	1198	1494	1476	1668
1401	58187	56440	59870	60259	58062	58763	60605	61847	59740	61696	59546.9	1676	1728	1520	2615	1848	1609	1566	1199	1501	1480	1674.2
1402	58386	56624	60076	60456	58278	58954	60839	62033	59949	61936	59753.1	1680	1736	1523	2626	1852	1613	1569	1203	1507	1488	1679.7
1403	58585	56826	60290	60652	58464	59142	61048	62266	60166	62158	59959.7	1685	1744	1534	2639	1859	1618	1579	1205	1516	1489	1686.8
1404	58787	57016	60504	60879	58669	59348	61252	62505	60381	62400	60174.1	1689	1750	1536	2647	1865	1623	1583	1212	1520	1492	1691.7
1405	58977	57176	60727	61102	58890	59542	61474	62720	60565	62629	60380.2	1690	1758	1540	2656	1868	1629	1588	1216	1530	1495	1697
1406	59211	57413	60930	61313	59128	59756	61704	62927	60769	62814	60596.5	1695	1762	1542	2662	1876	1630	1593	1219	1536	1496	1701.1
1407	59401	57650	61146	61534	59324	59962	61890	63143	60970	63059	60807.9	1697	1768	1543	2670	1884	1633	1601	1228	1538	1501	1706.3
1408	59598	57845	61326	61772	59526	60157	62093	63360	61170	63271	61011.8	1697	1775	1546	2684	1895	1638	1605	1234	1542	1506	1712.2
1409	59799	58028	61542	61993	59747	60363	62321	63583	61397	63504	61227.7	1705	1778	1556	2696	1899	1643	1610	1239	1545	1508	1717.9
1410	60008	58246	61751	62211	59972	60580	62550	63816	61627	63742	61450.3	1708	1785	1561	2712	1903	1649	1614	1243	1549	1514	1723.8
1411	60201	58419	61985	62402	60187	60788	62778	64043	61856	63959	61661.8	1717	1790	1565	2722	1909	1655	1619	1250	1551	1521	1729.9
1412	60417	58614	62186	62623	60370	61002	63005	64269	62077	64201	61876.4	1723	1796	1570	2726	1915	1662	1622	1250	1557	1523	1734.4
1413	60624	58834	62390	62834	60586	61196	63238	64499	62294	64422	62091.7	1726	1803	1576	2731	1921	1667	1626	1253	1561	1527	1739.1
1414	60818	59044	62604	63044	60788	61386	63479	64712	62495	64662	62303.2	1730	1811	1578	2737	1927	1674	1634	1256	1565	1528	1744
1415	61042	59273	62814	63266	60983	61606	63689	64941	62707	64900	62522.1	1734	1817	1584	2751	1930	1681	1640	1259	1570	1535	1750.1
1416	61274	59469	63062	63511	61214	61818	63906	65173	62927	65117	62747.1	1739	1822	1592	2767	1941	1687	1647	1263	1574	1541	1757.3
1417	61494	59667	63285	63716	61421	62023	64131	65435	63119	65349	62964	1745	1831	1598	2780	1946	1691	1658	1266	1582	1544	1764.1
1418	61724	59866	63512	63929	61606	62246	64371	65655	63352	65561	63182.2	1754	1840	1606	2789	1948	1694	1663	1269	1585	1547	1769.5
1419	61938	60079	63741	64186	61813	62475	64586	65881	63562	65809	63407	1764	1845	1612	2795	1951	1701	1668	1273	1589	1551	1774.9
1420	62165	60286	63963	64417	62016	62689	64804	66131	63789	66050	63631	1767	1851	1615	2801	1954	1707	1675	1280	1593	1561	1780.4
1421	62396	60500	64181	64656	62225	62902	65057	66384	64023	66295	63861.9	1771	1863	1622	2813	1960	1714	1680	1280	1599	1567	1786.9
1422	62598	60705	64442	64846	62437	63113	65257	66623	64241	66536	64079.8	1777	1869	1631	2815	1966	1727	1683	1283	1606	1572	1792.9
1423	62829	60926	64648	65072	62655	63358	65501	66834	64478	66761	64306.2	1780	1880	1636	2821	1973	1729	1686	1293	1614	1577	1798.9
1424	63048	61175	64873	65310	62894	63550	65746	67046	64725	66977	64534.4	1781	1885	1635	2829	1979	1740	1691	1292	1620	1583	1803.5
1425	63245	61400	65104	65557	63111	63752	66013	67278	64981	67202	64764.3	1786	1889	1640	2836	1983	1742	1694	1297	1622	1591	1808
1426	63518	61599	65334	65788	63314	63951	66253	67543	65226	67444	64997	1790	1892	1646	2849	1989	1744	1705	1300	1625	1600	1814
1427	63735	61831	65567	66013	63559	64153	66481	67772	65460	67679	65225	1793	1898	1649	2860	1996	1750	1711	1303	1627	1604	1819.1
1428	63942	62031	65779	66261	63790	64394	66701	68012	65690	67898	65449.8	1800	1902	1652	2868	2005	1754	1719	1310	1635	1612	1825.7
1429	64126	62257	65980	66491	64026	64624	66931	68273	65918	68145	65677.1	1803	1907	1655	2873	2014	1757	1721	1324	1642	1618	1831.4
1430	64387	62489	66256	66728	64254	64835	67168	68534	66159	68391	65920.1	1805	1916	1662	2877	2025	1758	1728	1333	1648	1620	1837.2
1431	64597	62703	66502	66964	64472	65075	67396	68770	66410	68633	66152.2	1807	1919	1665	2890	2028	1766	1734	1339	1654	1628	1843
1432	64827	62926	66748	67214	64726	65296	67598	69013	66634	68864	66384.6	1816	1927	1670	2900	2031	1772	1743	1341	1660	1637	1849.7
1433	65053	63151	67009	67463	64982	65497	67830	69230	66857	69125	66619.7	1824	1933	1675	2912	2036	1774	1750	1345	1667	1640	1855.6
1434	65306	63378	67269	67682	65201	65745	68054	69489	67096	69361	66858.1	1832	1941	1680	2918	2042	1777	1756	1352	1667	1651	1861.6
1435	65538	63638	67513	67923	65403	65948	68325	69725	67357	69604	67097.4	1839	1946	1688	2926	2050	1778	1758	1358	1673	1658	1867.4
1436	65765	63863	67723	68171	65632	66175	68596	69992	67588	69842	67334.7	1845	1950	1695	2934	2058	1783	1762	1366	1674	1668	1873.5
1437	66020	64078	67934	68422	65859	66396	68846	70238	67866	70083	67574.2	1848	1956	1699	2941	2059	1786	1765	1370	1676	1677	1877.7
1438	66276	64309	68172	68699	66109	66645	69089	70469	68101	70319	67818.8	1853	1963	1705	2948	2068	1795	1772	1376	1683	1679	1884.2
1439	66495	64528	68454	68936	66354	66868	69338	70733	68346	70559	68061.1	1862	1966	1710	2955	2068	1800	1779	1383	1684	1682	1888.9
1440	66732	64767	68687	69186	66600	67123	69590	70995	68608	70811	68309.9	1865	1970	1709	2961	2073	1805	1783	1384	1684	1688	1892.2
1441	66954	64960	68947	69452	66841	67387	69821	71230	68843	71089	68552.4	1869	1975	1722	2966	2081	1811	1788	1386	1683	1699	1898
1442	67171	65175	69192	69706	67067	67602	70088	71469	69078	71371	68791.9	1875	1981	1728	2973	2085	1825	1795	1396	1686	1701	1904.5
1443	67407	65398	69455	69951	67312	67839	70360	71729	69313	71630	69039.4	1888	1988	1733	2985	2093	1832	1798	1402	1694	1714	1912.7
1444	67625	65624	69709	70206	67564	68048	70597	71974	69567	71863	69277.7	1894	1990	1744	2996	2099	1839	1806	1406	1695	1717	1918.6
1445	67831	65860	69946	70477	67807	68311	70826	72219	69824	72123	69522.4	1900	1996	1755	3004	2109	1846	1818	1410	1704	1728	1927
1446	68065	66093	70196	70703	68028	68552	71077	72497	70053	72360	69762.4	1905	1999	1761	3020	2116	1849	1827	1416	1708	1734	1933.5
1447	68309	66345	70439	70965	68264	68792	71349	72768	70309	72615	70015.5	1913	2006	1769	3027	2121	1857	1834	1417	1711	1741	1939.6
1448	68535	66566	70695	71234	68508	69054	71638	73038	70577	72867	70271.2	1919	2011	1777	3036	2125	1863	1842	1416	1721	1754	1946.4
1449	68793	66788	70954	71500	68776	69293	71909	73287	70824	73154	70527.8	1922	2021	1782	3047	2139	1867	1850	1420	1724	1761	1953.3
1450	69027	67012	71218	71734	69002	69562	72202	73540	71064	73418	70777.9	1927	2028	1784	3060	2143	1871	1854	1427	1728	1766	1958.8
1451	69257	67264	71491	71986	69237	69813	72455	73792	71301	73701	71029.7	1930	2034	1791	3076	2145	1878	1860	1429	1733	1772	1964.8
1452	69490	67529	71738	72265	69460	70063	72723	74049	71543	73936	71279.6	1942	2039	1795	3088	2152	1889	1866	1433	1733	1774	1971.1
1453	69745	67758	71986	72517	69689	70301	72957	74292	71799	74209	71525.3	1950	2045	1795	3097	2162	1895	1872	1439	1733	1777	1976.5
1454	69991	67991	72230	72768	69954	70552	73220	74567	72056	74460	71778.9	1955	2050	1803	3105	2169	1906	1874	1443	1742	1784	1983.1
1455	70224	68239	72468	73008	70194	70807	73502	74858	72316	74743	72035.9	1959	2059	1806	3117	2177	1908	1881	1446	1750	1787	1989
1456	70468	68473	72731	73266	70474	71063	73756	75128	72571	75018	72294.8	1965	2065	1808	3130	2185	1914	1887	1450	1756	1791	1995.1
1457	70750	68728	73002	73537	70712	71343	74017	75411	72842	75271	72561.3	1970	2070	1811	3143	2188	1921	1893	1448	1762	1802	2000.8
1458	70998	68977	73266	73803	70960	71607	74287	75664	73123	75543	72822.8	1972	2080	1816	3153	2193	1928	1901	1452	1769	1806	2007
1459	71254	69258	73543	74044	71218	71833	74580	75927	73365	75815	73083.7	1977	2083	1819	3167	2198	1940	1906	1456	1782	1811	2013.9
1460	71528	69521	73807	74287	71495	72086	74836	76193	73600	76073	73342.6	1988	2095	1823	3179	2203	1945	1912	1462	1789	1813	2020.9
1461	71773	69728	74050	74578	71754	72322	75102	76455	73850	76338	73595	1996	2106	1831	3192	2212	1946	1912	1465	1793	1819	2027.2
1462	72022	69983	74322	74845	71995	72611	75380	76741	74123	76615	73863.7	2009	2110	1838	3204	2219	1950	1924	1467	1799	1823	2034.3
1463	72268	70258	74598	75095	72269	72887	75630	76995	74364	76884	74124.8	2015	2115	1846	3215	2226	1956	1934	1473	1803	1832	2041.5
1464	72555	70512	74884	75374	72524	73129	75917	77243	74637	77138	74391.3	2022	2123	1853	3225	2232	1962	1941	1483	1804	1837	2048.2
1465	72826	70749	75141	75663	72809	73364	76186	77536	74873	77403	74655	2030	2127	1862	3237	2234	1970	1948	1495	1814	1839	2055.6
1466	73047	70991	75442	75931	73055	73599	76453	77790	75154	77648	74911	2037	2132	1867	3253	2237	1975	1952	1501	1820	1847	2062.1
1467	73307	71227	75696	76200	73338	73872	76754	78086	75431	77945	75185.6	2039	2137	1872	3269	2242	1982	1962	1503	1832	1856	2069.4
1468	73565	71472	75988	76462	73610	74117	77046	78380	75700	78244	75458.4	2049	2144	1876	3281	2248	1987	1964	1513	1838	1861	2076.1
1469	73838	71715	76269	76767	73882	74380	77345	78674	75985	78546	75740.1	2054	2153	1879	3297	2252	1995	1976	1515	1842	1866	2082.9
1470	74130	71962	76534	77059	74126	74667	77623	78930	76260	78850	76014.1	2061	2160	1882	3302	2259	2005	1976	1521	1848	1871	2088.5
1471	74375	72181	76800	77351	74402	74928	77902	79221	76548	79086	76279.4	2069	2161	1888	3306	2265	2016	1978	1528	1855	1877	2094.3
1472	74615	72455	77057	77616	74703	75203	78179	79528	76802	79359	76551.7	2078	2170	1892	3314	2272	2031	1981	1537	1860	1882	2101.7
1473	74902	72709	77312	77932	74965	75474	78443	79845	77106	79640	76832.8	2085	2175	1903	3322	2277	2036	1983	1539	1863	1890	2107.3
1474	75159	72967	77570	78226	75239	75746	78743	80137	77401	79929	77111.7	2090	2180	1909	3327	2288	2041	1987	1541	1867	1897	2112.7
1475	75397	73243	77854	78513	75508	76041	79031	80445	77693	80226	77395.1	2098	2189	1916	3336	2295	2050	1992	1545	1874	1902	2119.7
1476	75648	73523	78119	78787	75821	76317	79315	80715	77943	80525	77671.3	2107	2196	1925	3345	2304	2060	1998	1553	1879	1908	2127.5
1477	75905	73793	78414	79094	76087	76604	79602	80998	78240	80824	77956.1	2109	2203	1925	3348	2315	2066	2003	1557	1884	1913	2132.3
1478	76216	74044	78717	79390	76377	76887	79895	81315	78536	81156	78253.3	2116	2208	1931	3362	2331	2075	2008	1563	1889	1919	2140.2
1479	76504	74301	78988	79682	76650	77157	80203	81624	78796	81477	78538.2	2124	2212	1937	3373	2335	2083	2018	1569	1894	1923	2146.8
1480	76769	74577	79257	79957	76933	77454	80493	81902	79064	81761	78816.7	2135	2220	1945	3381	2341	2093	2030	1573	1900	1929	2154.7
1481	77086	74850	79564	80236	77235	77756	80780	82210	79350	82046	79111.3	2147	2228	1954	3391	2349	2102	2034	1585	1903	1935	2162.8
1482	77373	75125	79854	80515	77514	78036	81085	82514	79664	82357	79403.7	2154	2241	1957	3402	2361	2112	2048	1593	1905	1948	2172.1
1483	77662	75397	80153	80769	77796	78332	81378	82848	79959	82682	79697.6	2161	2249	1964	3408	2366	2120	2056	1596	1914	1953	2178.7
1484	77942	75690	80466	81108	78087	78624	81666	83135	80235	82983	79993.6	2169	2252	1969	3425	2374	2125	2061	1600	1920	1961	2185.6
1485	78231	75966	80776	81392	78359	78888	81963	83437	80558	83274	80284.4	2174	2264	1983	3435	2388	2131	2068	1610	1925	1971	2194.9
1486	78531	76283	81091	81705	78653	79146	82287	83730	80826	83571	80582.3	2178	2270	1984	3456	2397	2143	2072	1611	1931	1981	2202.3
1487	78846	76576	81393	81985	78972	79391	82593	84038	81116	83895	80880.5	2182	2279	1995	3458	2405	2145	2083	1615	1936	1990	2208.8
1488	79127	76826	81682	82280	79251	79686	82855	84306	81397	84213	81162.3	2188	2286	1998	3472	2413	2150	2086	1623	1942	1997	2215.5
1489	79418	77089	81967	82569	79510	79983	83176	84622	81684	84497	81451.5	2194	2290	2005	3483	2419	2152	2091	1627	1949	2005	2221.5
1490	79694	77373	82242	82906	79809	80244	83480	84925	81974	84808	81745.5	2205	2298	2013	3491	2428	2164	2099	1631	1954	2017	2230
1491	79967	77632	82521	83222	80115	80544	83829	85284	82249	85087	82045	2218	2302	2017	3503	2442	2171	2106	1635	1960	2020	2237.4
1492	80281	77936	82796	83515	80414	80811	84134	85625	82548	85385	82344.5	2224	2309	2021	3519	2447	2173	2115	1641	1969	2028	2244.6
1493	80598	78229	83087	83791	80714	81129	84454	85954	82863	85661	82648	2227	2313	2029	3521	2457	2183	2117	1642	1979	2041	2250.9
1494	80877	78521	83415	84093	81021	81412	84755	86256	83156	85949	82945.5	2239	2319	2037	3531	2463	2192	2124	1644	1981	2049	2257.9
1495	81151	78828	83701	84394	81301	81720	85033	86570	83445	86246	83238.9	2249	2327	2047	3542	2472	2199	2133	1653	1991	2052	2266.5
1496	81469	79134	84010	84715	81583	82012	85329	86913	83742	86538	83544.5	2258	2326	2053	3557	2481	2205	2135	1655	1997	2058	2272.5
1497	81767	79406	84320	85015	81847	82320	85588	87220	84023	86829	83833.5	2260	2334	2059	3566	2494	2210	2144	1658	2006	2065	2279.6
1498	82053	79662	84611	85310	82127	82606	85897	87534	84317	87140	84125.7	2269	2341	2065	3579	2506	2212	2149	1664	2011	2071	2286.7
1499	82375	79953	84922	85610	82433	82872	86177	87865	84610	87456	84427.3	2279	2355	2070	3589	2523	2216	2156	1669	2018	2077	2295.2
1500	82673	80223	85243	85903	82756	83171	86478	88178	84927	87739	84729.1	2286	2359	2074	3607	2529	2225	2161	1674	2026	2080	2302.1
1501	82959	80546	85534	86163	83095	83477	86806	88508	85237	88055	85038	2297	2363	2078	3615	2536	2232	2170	1681	2035	2082	2308.9
1502	83284	80819	85850	86482	83378	83772	87104	88804	85559	88355	85340.7	2307	2369	2089	3627	2543	2239	2180	1686	2037	2091	2316.8
1503	83607	81130	86142	86765	83652	84066	87434	89130	85899	88666	85649.1	2318	2375	2090	3638	2552	2245	2190	1694	2048	2096	2324.6
1504	83884	81449	86472	87076	83939	84374	87748	89455	86233	89005	85963.5	2325	2385	2097	3649	2562	2252	2196	1698	2050	2104	2331.8
1505	84201	81754	86797	87382	84227	84693	88059	89768	86539	89328	86274.8	2331	2392	2103	3658	2567	2265	2198	1704	2059	2107	2338.4
1506	84495	82006	87104	87710	84501	85014	88350	90101	86907	89635	86582.3	2340	2397	2112	3671	2577	2270	2201	1712	2062	2111	2345.3
1507	84790	82322	87417	88018	84845	85326	88666	90453	87228	89958	86902.3	2351	2407	2124	3687	2590	2278	2211	1712	2073	2112	2354.5
1508	85100	82598	87738	88340	85149	85634	89001	90755	87557	90281	87215.3	2350	2420	2135	3701	2600	2280	2220	1716	2081	2112	2361.5
1509	85422	82915	88054	88642	85477	85923	89327	91078	87852	90605	87529.5	2356	2424	2142	3709	2613	2287	2232	1718	2087	2117	2368.5
1510	85779	83257	88355	88981	85772	86232	89647	91389	88169	90933	87851.4	2356	2430	2151	3721	2623	2293	2235	1719	2091	2123	2374.2
1511	86103	83526	88682	89326	86076	86530	89893	91747	88474	91269	88162.6	2367	2444	2162	3733	2631	2300	2238	1723	2096	2127	2382.1
1512	86401	83797	89002	89645	86411	86810	90201	92058	88794	91570	88468.9	2379	2455	2169	3742	2638	2303	2242	1729	2104	2137	2389.8
1513	86717	84133	89346	89971	86725	87117	90535	92361	89147	91928	88798	2385	2460	2174	3753	2646	2308	2247	1739	2105	2144	2396.1
1514	86985	84436	89657	90287	87039	87457	90839	92711	89456	92252	89111.9	2394	2463	2182	3763	2652	2319	2253	1752	2110	2154	2404.2
1515	87287	84766	89969	90594	87351	87768	91177	93050	89744	92557	89426.3	2401	2470	2189	3780	2669	2325	2257	1755	2114	2160	2412
1516	87568	85047	90281	90905	87643	88104	91516	93374	90058	92907	89740.3	2406	2473	2195	3796	2678	2328	2270	1765	2120	2170	2420.1
1517	87872	85351	90576	91243	87968	88419	91893	93707	90386	93223	90063.8	2415	2484	2206	3806	2683	2332	2279	1774	2128	2178	2428.5
1518	88195	85634	90910	91600	88279	88753	92234	94013	90711	93583	90391.2	2423	2503	2214	3813	2692	2338	2282	1776	2134	2189	2436.4
1519	88515	85956	91226	91928	88586	89061	92563	94359	91055	93919	90716.8	2438	2512	2220	3836	2706	2340	2288	1779	2144	2194	2445.7
1520	88819	86264	91533	92251	88876	89362	92909	94707	91405	94244	91037	2448	2520	2226	3849	2717	2347	2297	1784	2152	2199	2453.9
1521	89128	86567	91897	92587	89208	89699	93220	95060	91758	94545	91366.9	2454	2525	2237	3858	2727	2352	2303	1790	2168	2205	2461.9
1522	89428	86890	92216	92900	89548	89995	93551	95390	92079	94877	91687.4	2459	2527	2241	3872	2744	2357	2313	1798	2182	2210	2470.3
1523	89733	87224	92570	93276	89881	90311	93878	95713	92454	95208	92024.8	2472	2536	2242	3889	2749	2363	2320	1805	2189	2223	2478.8
1524	90023	87494	92864	93600	90226	90652	94211	96053	92799	95552	92347.4	2476	2550	2245	3896	2751	2364	2327	1810	2199	2228	2484.6
1525	90333	87814	93232	93938	90533	90991	94524	96391	93120	95912	92678.8	2485	2557	2251	3902	2760	2376	2333	1821	2205	2236	2492.6
1526	90658	88148	93570	94266	90851	91340	94893	96733	93446	96255	93016	2495	2571	2256	3912	2764	2383	2343	1824	2211	2250	2500.9
1527	90979	88451	93879	94592	91170	91663	95258	97090	93782	96594	93345.8	2505	2576	2262	3930	2771	2391	2351	1832	2220	2251	2508.9
1528	91350	88761	94208	94919	91468	92014	95574	97427	94105	96928	93675.4	2512	2583	2268	3941	2783	2396	2358	1836	2226	2257	2516
1529	91691	89099	94561	95288	91806	92351	95931	97767	94427	97252	94017.3	2526	2594	2272	3958	2798	2397	2361	1846	2240	2262	2525.4
1530	92012	89424	94931	95647	92124	92698	96281	98115	94776	97594	94360.2	2537	2598	2279	3979	2805	2403	2362	1853	2248	2277	2534.1
1531	92316	89733	95290	95957	92396	93049	96606	98455	95137	97934	94687.3	2544	2602	2291	3997	2816	2408	2367	1857	2255	2284	2542.1
1532	92657	90036	95633	96310	92712	93396	96946	98777	95456	98305	95022.8	2556	2610	2298	4007	2828	2419	2374	1861	2265	2292	2551
1533	92937	90359	95960	96622	93045	93742	97255	99060	95823	98653	95345.6	2561	2620	2305	4019	2839	2430	2380	1864	2276	2298	2559.2
1534	93285	90692	96303	96971	93376	94086	97585	99405	96170	98994	95686.7	2569	2630	2309	4034	2845	2433	2387	1867	2285	2302	2566.1
1535	93596	91013	96679	97303	93698	94437	97921	99746	96516	99353	96026.2	2573	2638	2315	4062	2847	2446	2401	1868	2293	2312	2575.5
1536	93948	91335	97027	97665	94030	94762	98281	100102	96861	99717	96372.8	2580	2651	2323	4075	2857	2456	2406	1873	2297	2317	2583.5
1537	94301	91660	97369	98006	94338	95103	98607	100452	97190	100052	96707.8	2584	2657	2334	4089	2862	2469	2414	1880	2307	2325	2592.1
1538	94619	91954	97700	98355	94662	95444	98935	100799	97541	100443	97045.2	2593	2664	2337	4103	2873	2475	2422	1886	2315	2329	2599.7
1539	94933	92259	98050	98698	94997	95772	99256	101136	97906	100790	97379.7	2597	2669	2341	4124	2878	2483	2426	1888	2320	2336	2606.2
1540	95261	92614	98428	99052	95317	96109	99582	101500	98250	101133	97724.6	2602	2681	2350	4133	2888	2491	2433	1897	2328	2343	2614.6
1541	95616	92946	98789	99409	95653	96442	99915	101874	98576	101501	98072.1	2615	2689	2360	4147	2900	2499	2443	1903	2341	2349	2624.6
1542	95940	93270	99177	99748	95961	96785	100311	102232	98962	101842	98422.8	2630	2697	2369	4162	2909	2508	2451	1909	2348	2357	2634
1543	96284	93626	99546	100071	96314	97119	100701	102581	99302	102191	98773.5	2639	2709	2383	4170	2921	2521	2464	1915	2355	2366	2644.3
1544	96618	93968	99864	100434	96693	97456	101046	102947	99671	102574	99127.1	2647	2715	2390	4186	2931	2526	2468	1920	2363	2378	2652.4
1545	96974	94328	100222	100769	97045	97805	101393	103319	100020	102919	99479.4	2658	2729	2398	4195	2934	2529	2476	1926	2371	2384	2660
1546	97314	94679	100592	101147	97382	98181	101748	103686	100360	103295	99838.4	2674	2739	2414	4208	2948	2537	2485	1929	2381	2386	2670.1
1547	97673	95030	100931	101510	97731	98525	102114	104025	100726	103626	100189	2688	2757	2425	4227	2958	2552	2495	1937	2385	2387	2681.1
1548	98030	95362	101285	101867	98067	98904	102458	104428	101099	103961	100546	2701	2770	2436	4234	2967	2561	2506	1939	2387	2394	2689.5
1549	98388	95679	101619	102204	98376	99288	102820	104785	101433	104314	100891	2703	2789	2441	4248	2984	2567	2510	1944	2390	2398	2697.4
1550	98753	96002	101973	102571	98716	99658	103206	105174	101786	104709	101255	2707	2800	2449	4261	2999	2577	2521	1947	2395	2404	2706
1551	99155	96346	102327	102936	99069	100016	103585	105556	102142	105084	101622	2718	2817	2462	4279	3008	2584	2526	1955	2404	2409	2716.2
1552	99563	96703	102669	103306	99397	100361	103924	105924	102455	105436	101974	2725	2824	2469	4299	3011	2599	2535	1966	2409	2417	2725.4
1553	99918	97027	103053	103650	99732	100705	104311	106303	102839	105820	102336	2730	2834	2479	4309	3020	2606	2544	1975	2415	2426	2733.8
1554	100247	97375	103408	104023	100082	101056	104661	106717	103190	106194	102695	2733	2840	2488	4328	3029	2620	2551	1980	2424	2439	2743.2
1555	100625	97723	103757	104377	100421	101406	105038	107097	103552	106583	103058	2740	2848	2498	4350	3044	2627	2559	1985	2434	2447	2753.2
1556	100966	98033	104144	104767	100744	101777	105394	107476	103930	106973	103420	2749	2861	2505	4364	3052	2640	2565	1989	2446	2454	2762.5
1557	101318	98387	104527	105153	101132	102120	105725	107863	104301	107372	103790	2756	2873	2510	4380	3065	2647	2573	1997	2457	2461	2771.9
1558	101653	98707	104899	105534	101484	102511	106086	108240	104702	107783	104160	2763	2882	2523	4391	3076	2655	2584	2008	2464	2466	2781.2
1559	102060	99057	105262	105887	101853	102857	106456	108626	105076	108143	104528	2768	2891	2528	4405	3083	2662	2591	2017	2472	2470	2788.7
1560	102422	99398	105668	106256	102198	103199	106824	109023	105447	108515	104895	2777	2904	2532	4413	3091	2670	2599	2021	2485	2475	2796.7
1561	102805	99754	106075	106631	102555	103600	107194	109429	105794	108873	105271	2786	2919	2543	4424	3106	2675	2606	2025	2492	2486	2806.2
1562	103143	100138	106462	107007	102910	103965	107551	109817	106174	109227	105639	2796	2926	2550	4439	3120	2684	2613	2030	2504	2497	2815.9
1563	103489	100476	106865	107385	103280	104324	107914	110205	106564	109585	106009	2805	2930	2556	4449	3128	2691	2620	2040	2510	2500	2822.9
1564	103830	100815	107263	107800	103667	104731	108299	110592	106943	109952	106389	2815	2941	2559	4460	3138	2703	2628	2046	2517	2511	2831.8
1565	104196	101142	107661	108180	104026	105102	108681	110986	107311	110333	106762	2821	2953	2565	4483	3153	2717	2636	2050	2526	2518	2842.2
1566	104565	101486	108001	108544	104384	105455	109091	111372	107685	110735	107132	2838	2966	2573	4493	3162	2726	2650	2057	2538	2525	2852.8
1567	104899	101856	108380	108878	104715	105843	109457	111772	108055	111151	107501	2848	2980	2581	4510	3173	2736	2660	2062	2542	2532	2862.4
1568	105251	102200	108711	109241	105090	106215	109843	112175	108410	111543	107868	2857	2990	2592	4530	3176	2751	2673	2069	2550	2538	2872.6
1569	105580	102556	109087	109632	105484	106593	110248	112641	108775	111948	108254	2868	2996	2603	4538	3191	2764	2686	2070	2557	2544	2881.7
1570	105963	102920	109461	109983	105842	106938	110632	113022	109156	112379	108630	2879	3005	2609	4554	3194	2769	2696	2080	2565	2561	2891.2
1571	106336	103269	109913	110385	106211	107289	110994	113430	109528	112761	109012	2894	3015	2622	4575	3202	2778	2698	2090	2568	2574	2901.6
1572	106705	103652	110327	110766	106613	107679	111362	113838	109919	113138	109400	2897	3027	2632	4588	3207	2785	2715	2098	2577	2580	2910.6
1573	107075	104001	110743	111193	107003	108061	111753	114227	110294	113544	109789	2899	3040	2639	4607	3215	2791	2724	2100	2586	2590	2919.1
1574	107431	104350	111109	111613	107357	108447	112148	114628	110649	113951	110168	2905	3048	2646	4635	3228	2797	2733	2108	2594	2593	2928.7
1575	107799	104732	111504	111997	107723	108827	112555	115030	111019	114362	110555	2911	3054	2657	4650	3237	2800	2745	2112	2600	2599	2936.5
1576	108172	105114	111901	112401	108095	109231	112974	115487	111419	114766	110956	2924	3063	2666	4665	3250	2816	2757	2117	2610	2610	2947.8
1577	108551	105512	112307	112804	108466	109599	113349	115877	111831	115198	111349	2931	3084	2673	4677	3260	2827	2764	2124	2618	2618	2957.6
1578	108950	105910	112702	113203	108855	109954	113736	116265	112261	115638	111747	2941	3094	2682	4686	3269	2836	2774	2130	2631	2628	2967.1
1579	109348	106271	113081	113625	109247	110344	114168	116692	112650	116051	112148	2959	3112	2693	4704	3271	2850	2785	2138	2643	2636	2979.1
1580	109740	106652	113447	114024	109624	110744	114617	117139	113009	116527	112552	2969	3118	2704	4716	3278	2866	2796	2145	2653	2641	2988.6
1581	110121	107026	113842	114442	109992	111132	115049	117538	113402	116906	112945	2977	3128	2716	4725	3285	2882	2807	2149	2664	2649	2998.2
1582	110493	107426	114228	114858	110392	111477	115430	117970	113790	117331	113340	2994	3142	2727	4738	3297	2893	2815	2155	2668	2651	3008
1583	110865	107788	114634	115266	110772	111880	115838	118391	114198	117772	113740	3009	3158	2738	4751	3304	2906	2824	2156	2680	2661	3018.7
1584	111190	108174	115052	115662	111193	112250	116245	118817	114596	118209	114139	3019	3170	2748	4765	3315	2909	2836	2161	2686	2670	3027.9
1585	111560	108533	115452	116065	111574	112606	116677	119240	115009	118654	114537	3028	3179	2754	4777	3325	2920	2848	2167	2698	2678	3037.4
1586	111921	108912	115892	116476	111980	113035	117087	119639	115429	119076	114945	3039	3185	2766	4794	3333	2928	2859	2175	2708	2689	3047.6
1587	112343	109307	116276	116870	112382	113421	117543	120069	115837	119500	115355	3049	3195	2778	4804	3341	2939	2870	2186	2717	2703	3058.2
1588	112736	109663	116716	117320	112756	113816	117979	120479	116249	119915	115763	3061	3202	2780	4811	3350	2946	2880	2191	2726	2707	3065.4
1589	113156	110069	117106	117702	113158	114233	118389	120919	116657	120340	116173	3074	3211	2790	4824	3363	2957	2893	2197	2734	2723	3076.6
1590	113554	110453	117526	118137	113571	114634	118786	121340	117047	120789	116584	3081	3221	2799	4840	3373	2963	2904	2202	2742	2734	3085.9
1591	113984	110890	117921	118517	114001	115030	119221	121786	117489	121203	117004	3088	3228	2811	4852	3382	2970	2908	2208	2749	2741	3093.7
1592	114397	111265	118318	118977	114407	115454	119673	122207	117936	121662	117430	3095	3237	2827	4864	3387	2980	2917	2217	2756	2752	3103.2
1593	114825	111669	118712	119435	114792	115866	120084	122651	118327	122136	117850	3104	3246	2835	4871	3403	2991	2925	2229	2762	2759	3112.5
1594	115209	112062	119126	119860	115176	116286	120489	123059	118747	122531	118254	3115	3261	2845	4889	3411	2998	2936	2234	2770	2772	3123.1
1595	115616	112457	119535	120303	115582	116668	120929	123466	119187	122975	118672	3126	3267	2851	4903	3419	3011	2944	2240	2778	2782	3132.1
1596	116049	112866	119978	120763	115979	117082	121352	123895	119653	123403	119102	3136	3279	2861	4925	3430	3022	2951	2247	2785	2796	3143.2
1597	116481	113306	120404	121231	116385	117470	121758	124345	120067	123877	119532	3148	3296	2871	4937	3449	3029	2970	2255	2796	2806	3155.7
1598	116903	113755	120821	121679	116796	117899	122161	124812	120516	124282	119962	3159	3312	2886	4955	3459	3038	2978	2260	2806	2813	3166.6
1599	117343	114134	121265	122144	117170	118300	122576	125279	121016	124740	120397	3164	3324	2898	4960	3470	3048	2991	2272	2812	2821	3176
1600	117793	114558	121663	122553	117590	118721	123009	125715	121447	125198	120825	3180	3334	2905	4972	3482	3053	3004	2282	2818	2833	3186.3
1601	118238	114915	122111	122974	118024	119151	123435	126163	121873	125677	121256	3197	3340	2911	4990	3498	3068	3020	2288	2826	2842	3198
1602	118666	115360	122572	123386	118433	119568	123851	126635	122356	126144	121697	3208	3350	2913	5008	3514	3080	3034	2298	2841	2853	3209.9
1603	119042	115770	123033	123802	118824	119968	124307	127070	122769	126604	122119	3222	3355	2918	5027	3526	3085	3041	2308	2851	2861	3219.4
1604	119445	116170	123432	124268	119264	120366	124755	127502	123224	127070	122550	3231	3361	2929	5041	3542	3088	3050	2314	2859	2875	3229
1605	119851	116581	123883	124752	119688	120794	125183	127930	123663	127546	122987	3242	3371	2938	5067	3560	3094	3062	2326	2869	2882	3241.1
1606	120296	116990	124367	125162	120116	121192	125645	128375	124135	127997	123428	3256	3379	2953	5086	3576	3100	3067	2342	2878	2890	3252.7
1607	120723	117367	124845	125642	120535	121604	126098	128845	124590	128454	123870	3267	3392	2963	5113	3585	3119	3076	2347	2883	2900	3264.5
1608	121148	117816	125262	126082	121004	122011	126532	129351	125039	128934	124318	3281	3396	2973	5122	3591	3125	3083	2355	2887	2910	3272.3
1609	121546	118236	125690	126532	121414	122428	127005	129770	125478	129393	124749	3290	3403	2987	5140	3608	3136	3093	2362	2901	2918	3283.8
1610	121954	118658	126166	126969	121850	122856	127459	130232	125875	129822	125184	3303	3417	2993	5156	3621	3151	3101	2369	2908	2928	3294.7
1611	122384	119067	126621	127467	122248	123321	127908	130706	126283	130307	125631	3314	3426	3009	5167	3635	3165	3113	2380	2912	2936	3305.7
1612	122783	119481	127047	127886	122685	123750	128346	131172	126740	130757	126065	3325	3437	3018	5186	3646	3175	3128	2381	2922	2949	3316.7
1613	123214	119917	127522	128336	123113	124230	128808	131657	127167	131245	126521	3336	3448	3023	5198	3658	3178	3141	2390	2929	2962	3326.3
1614	123658	120372	127949	128771	123557	124691	129270	132163	127664	131699	126979	3351	3459	3041	5219	3671	3189	3150	2394	2941	2970	3338.5
1615	124102	120770	128388	129248	124025	125139	129696	132634	128105	132166	127427	3360	3466	3055	5236	3677	3203	3156	2400	2948	2973	3347.4
1616	124542	121201	128832	129717	124466	125600	130175	133091	128494	132646	127876	3375	3478	3066	5265	3685	3218	3168	2406	2959	2982	3360.2
1617	124951	121647	129286	130200	124923	126052	130659	133529	128941	133088	128328	3387	3485	3072	5285	3698	3236	3171	2414	2959	2992	3369.9
1618	125395	122056	129757	130689	125331	126518	131096	134036	129411	133549	128784	3398	3495	3082	5305	3712	3250	3176	2425	2965	3000	3380.8
1619	125857	122466	130205	131144	125786	126956	131543	134542	129857	134024	129238	3410	3504	3087	5322	3723	3261	3182	2430	2979	3013	3391.1
1620	126330	122911	130664	131607	126285	127400	132018	135026	130303	134472	129702	3421	3518	3096	5350	3732	3270	3193	2435	2986	3024	3402.5
1621	126811	123342	131095	132061	126764	127856	132499	135559	130729	134978	130169	3429	3528	3101	5366	3750	3280	3205	2443	2998	3033	3413.3
1622	127237	123801	131612	132523	127219	128370	133006	136038	131221	135462	130649	3424	3542	3104	5385	3769	3290	3213	2455	3017	3044	3424.3
1623	127718	124243	132072	132952	127685	128873	133493	136509	131722	135944	131121	3438	3543	3118	5407	3778	3301	3219	2458	3030	3058	3435
1624	128174	124706	132528	133446	128137	129331	133977	137001	132198	136450	131595	3454	3553	3128	5428	3796	3311	3234	2466	3043	3068	3448.1
1625	128626	125153	133019	133922	128593	129802	134456	137492	132726	136943	132073	3468	3571	3137	5449	3815	3317	3244	2476	3052	3076	3460.5
1626	129099	125602	133504	134439	129070	130291	134944	137963	133203	137435	132555	3467	3584	3146	5466	3826	3326	3255	2488	3061	3088	3470.7
1627	129558	126051	133979	134902	129585	130728	135419	138481	133673	137951	133033	3475	3590	3159	5496	3842	3340	3266	2499	3069	3094	3483
1628	130038	126511	134476	135429	130045	131158	135896	138990	134167	138476	133519	3488	3602	3170	5524	3849	3352	3281	2506	3080	3105	3495.7
1629	130529	126957	134961	135933	130509	131631	136409	139513	134651	138989	134008	3496	3617	3177	5544	3858	3368	3292	2516	3085	3110	3506.3
1630	131020	127444	135428	136399	130989	132085	136890	140040	135157	139515	134497	3510	3625	3188	5557	3868	3387	3310	2526	3096	3120	3518.7
1631	131531	127914	135940	136899	131467	132562	137356	140516	135601	140012	134980	3519	3640	3197	5580	3875	3396	3323	2534	3109	3127	3530
1632	131955	128354	136405	137381	132002	133039	137856	141010	136089	140494	135458	3528	3660	3202	5591	3888	3403	3333	2545	3118	3140	3540.8
1633	132429	128815	136862	137863	132466	133520	138378	141523	136560	140952	135937	3534	3675	3216	5619	3906	3407	3347	2553	3124	3152	3553.3
1634	132895	129261	137355	138316	132933	133980	138886	142027	137048	141447	136415	3547	3687	3219	5636	3912	3417	3356	2558	3131	3161	3562.4
1635	133399	129709	137883	138841	133427	134445	139426	142527	137593	141942	136919	3561	3693	3229	5642	3924	3430	3368	2560	3139	3177	3572.3
1636	133854	130173	138382	139317	133918	134946	139920	143013	138091	142467	137408	3570	3700	3240	5666	3937	3445	3384	2572	3151	3186	3585.1
1637	134338	130627	138870	139780	134399	135408	140400	143541	138557	142973	137889	3579	3714	3251	5694	3945	3454	3395	2582	3167	3204	3598.5
1638	134852	131081	139371	140267	134879	135899	140869	144082	139042	143539	138388	3596	3734	3264	5713	3958	3473	3408	2597	3177	3213	3613.3
1639	135347	131566	139868	140801	135378	136427	141427	144604	139544	144060	138902	3605	3742	3278	5737	3974	3488	3416	2598	3180	3224	3624.2
1640	135778	132055	140392	141308	135896	136918	141905	145116	139993	144570	139393	3627	3755	3288	5751	3992	3496	3425	2606	3189	3240	3636.9
1641	136336	132546	140898	141799	136348	137437	142415	145648	140527	145077	139903	3636	3761	3299	5769	4015	3510	3436	2617	3206	3251	3650
1642	136777	133013	141424	142288	136835	137929	142891	146176	141048	145589	140397	3654	3773	3312	5792	4031	3520	3453	2622	3214	3265	3663.6
1643	137248	133508	141953	142811	137325	138427	143401	146750	141562	146143	140913	3660	3786	3320	5806	4055	3532	3461	2631	3221	3273	3674.5
1644	137769	133953	142499	143276	137836	138897	143906	147263	142079	146681	141416	3676	3801	3333	5827	4063	3541	3473	2638	3228	3283	3686.3
1645	138267	134411	143013	143797	138422	139399	144465	147799	142578	147211	141936	3687	3811	3350	5846	4074	3549	3486	2648	3238	3295	3698.4
1646	138761	134915	143547	144250	138918	139881	144973	148336	143092	147768	142444	3698	3813	3359	5862	4090	3557	3498	2658	3255	3311	3710.1
1647	139270	135392	144055	144781	139445	140384	145494	148867	143596	148272	142956	3713	3820	3367	5872	4098	3571	3505	2667	3268	3324	3720.5
1648	139749	135822	144597	145319	139961	140841	146013	149414	144130	148769	143462	3726	3835	3378	5897	4105	3589	3516	2675	3275	3337	3733.3
1649	140283	136310	145095	145804	140445	141344	146555	149940	144645	149275	143970	3735	3848	3387	5919	4117	3599	3526	2686	3281	3346	3744.4
1650	140772	136804	145641	146352	140980	141867	147076	150479	145212	149782	144496	3745	3859	3401	5937	4126	3613	3536	2698	3292	3361	3756.8
1651	141256	137282	146180	146875	141492	142357	147602	151052	145773	150312	145018	3761	3869	3408	5943	4142	3627	3543	2702	3307	3373	3767.5
1652	141779	137802	146715	147404	141994	142878	148131	151585	146295	150909	145549	3772	3885	3421	5952	4152	3635	3556	2705	3316	3383	3777.7
1653	142300	138261	147286	147940	142527	143401	148651	152121	146844	151496	146083	3786	3894	3434	5969	4172	3649	3568	2715	3328	3399	3791.4
1654	142840	138755	147807	148502	143019	143950	149174	152660	147398	152056	146616	3792	3910	3446	5989	4180	3656	3581	2721	3339	3412	3802.6
1655	143347	139256	148343	149047	143492	144484	149705	153207	147946	152625	147145	3794	3920	3463	6016	4194	3667	3594	2734	3358	3419	3815.9
1656	143861	139720	148868	149568	144014	144983	150256	153731	148448	153186	147664	3810	3933	3476	6030	4204	3682	3605	2738	3370	3426	3827.4
1657	144350	140223	149388	150117	144566	145512	150818	154277	148969	153758	148198	3818	3941	3490	6052	4217	3695	3621	2747	3377	3433	3839.1
1658	144842	140699	149904	150649	145087	146009	151373	154831	149503	154308	148720	3828	3953	3494	6067	4233	3706	3630	2757	3385	3449	3850.2
1659	145376	141209	150408	151178	145638	146529	151892	155393	150028	154839	149249	3848	3965	3501	6084	4249	3718	3636	2772	3391	3457	3862.1
1660	145897	141674	150941	151719	146149	147051	152508	155991	150556	155390	149788	3860	3980	3518	6102	4265	3725	3642	2788	3398	3469	3874.7
1661	146458	142143	151482	152245	146660	147537	152995	156558	151111	155945	150313	3879	3991	3528	6120	4278	3736	3646	2799	3410	3476	3886.3
1662	146944	142642	152019	152811	147210	148076	153529	157124	151641	156467	150846	3896	4000	3541	6142	4291	3742	3660	2814	3418	3487	3899.1
1663	147477	143196	152576	153344	147766	148636	154082	157691	152176	157016	151396	3906	4015	3558	6161	4300	3758	3671	2818	3428	3510	3912.5
1664	147971	143698	153137	153850	148323	149214	154609	158268	152712	157569	151935	3923	4024	3569	6177	4311	3767	3683	2828	3435	3523	3924
1665	148509	144201	153741	154420	148801	149706	155186	158867	153257	158180	152487	3940	4035	3587	6202	4324	3776	3693	2838	3443	3530	3936.8
1666	149069	144717	154334	154945	149338	150271	155720	159490	153827	158698	153041	3954	4048	3601	6222	4331	3787	3705	2847	3447	3543	3948.5
1667	149598	145246	154920	155532	149865	150806	156297	160047	154346	159300	153596	3966	4067	3616	6245	4348	3804	3731	2851	3467	3558	3965.3
1668	150158	145793	155476	156070	150426	151362	156898	160642	154886	159843	154155	3975	4086	3626	6255	4364	3813	3746	2860	3479	3565	3976.9
1669	150715	146316	156058	156619	150987	151924	157499	161211	155455	160404	154719	3983	4099	3637	6279	4376	3825	3759	2869	3487	3573	3988.7
1670	151232	146880	156670	157156	151527	152509	158018	161775	156041	160973	155278	3999	4111	3646	6303	4394	3842	3771	2877	3499	3588	4003
1671	151804	147408	157251	157692	152141	153030	158593	162369	156649	161569	155851	4022	4129	3658	6316	4407	3856	3790	2880	3508	3601	4016.7
1672	152409	148007	157806	158285	152716	153581	159151	162924	157196	162113	156419	4039	4146	3668	6333	4422	3866	3800	2887	3521	3613	4029.5
1673	152938	148510	158377	158810	153275	154166	159717	163546	157736	162724	156980	4056	4163	3680	6349	4436	3877	3805	2902	3526	3622	4041.6
1674	153469	149070	158943	159418	153850	154741	160312	164142	158279	163309	157553	4067	4180	3684	6371	4460	3886	3820	2912	3544	3630	4055.4
1675	154021	149548	159517	159980	154415	155332	160900	164701	158882	163906	158120	4082	4198	3701	6397	4477	3893	3829	2918	3558	3647	4070
1676	154577	150071	160106	160565	154926	155904	161469	165281	159451	164478	158683	4093	4210	3711	6415	4487	3904	3845	2926	3578	3657	4082.6
1677	155162	150650	160707	161146	155460	156473	162042	165899	159992	165055	159259	4108	4223	3723	6432	4499	3912	3858	2937	3586	3666	4094.4
1678	155721	151185	161260	161700	156018	157022	162592	166479	160584	165687	159825	4122	4244	3735	6449	4515	3932	3870	2947	3592	3673	4107.9
1679	156287	151704	161847	162269	156595	157606	163193	167083	161134	166266	160398	4142	4255	3747	6479	4529	3950	3885	2961	3600	3681	4122.9
1680	156876	152269	162419	162860	157114	158190	163801	167740	161693	166852	160981	4158	4270	3758	6501	4551	3961	3902	2970	3614	3697	4138.2
1681	157478	152874	162999	163469	157688	158734	164427	168337	162287	167471	161576	4167	4277	3769	6523	4564	3974	3918	2978	3628	3709	4150.7
1682	158090	153442	163564	164024	158237	159268	165031	168986	162862	168061	162156	4181	4294	3783	6548	4581	3987	3922	2986	3638	3723	4164.3
1683	158653	153965	164166	164633	158811	159847	165644	169600	163447	168680	162745	4202	4299	3792	6565	4591	3994	3931	3001	3652	3741	4176.8
1684	159194	154512	164773	165222	159374	160426	166200	170221	163985	169275	163318	4209	4313	3798	6586	4600	4001	3944	3010	3661	3751	4187.3
1685	159769	155108	165340	165813	159999	160964	166825	170798	164539	169865	163902	4217	4326	3808	6605	4622	4017	3960	3016	3670	3758	4199.9
1686	160335	155682	165946	166401	160585	161561	167453	171401	165123	170521	164501	4240	4336	3821	6626	4637	4030	3973	3026	3688	3761	4213.8
1687	160898	156250	166519	166977	161136	162109	168051	172044	165751	171114	165085	4267	4354	3829	6640	4651	4044	3987	3033	3707	3774	4228.6
1688	161494	156820	167142	167600	161706	162724	168674	172640	166383	171760	165694	4279	4366	3842	6666	4673	4055	3996	3035	3716	3784	4241.2
1689	162049	157426	167792	168171	162301	163320	169271	173221	167035	172356	166294	4292	4377	3847	6681	4692	4069	4009	3048	3726	3794	4253.5
1690	162622	158009	168417	168771	162877	163904	169871	173821	167633	173001	166893	4314	4394	3858	6709	4711	4077	4017	3055	3738	3802	4267.5
1691	163202	158601	169023	169389	163454	164476	170490	174458	168232	173618	167494	4327	4411	3875	6726	4734	4093	4031	3063	3743	3809	4281.2
1692	163781	159184	169611	169982	164017	165073	171126	175114	168890	174213	168099	4336	4425	3890	6749	4748	4102	4041	3073	3760	3818	4294.2
1693	164381	159758	170188	170599	164635	165678	171762	175741	169465	174878	168708	4347	4437	3907	6773	4769	4115	4049	3082	3778	3824	4308.1
1694	164996	160337	170782	171176	165208	166260	172363	176319	170069	175483	169299	4362	4451	3918	6792	4778	4127	4067	3097	3784	3842	4321.8
1695	165646	160906	171406	171803	165772	166861	172928	176968	170682	176107	169908	4367	4461	3924	6822	4803	4142	4078	3102	3796	3851	4334.6
1696	166167	161481	171993	172429	166390	167446	173520	177642	171298	176760	170513	4383	4478	3932	6847	4821	4163	4092	3112	3802	3865	4349.5
1697	166794	162068	172624	173097	166979	168047	174151	178259	171899	177395	171131	4394	4492	3948	6875	4831	4173	4109	3129	3816	3874	4364.1
1698	167371	162690	173274	173695	167552	168598	174783	178894	172525	177990	171737	4402	4503	3954	6895	4850	4191	4127	3132	3829	3883	4376.6
1699	167937	163292	173936	174283	168117	169201	175442	179521	173200	178617	172355	4406	4517	3957	6915	4862	4202	4138	3139	3841	3894	4387.1
1700	168557	163841	174600	174900	168725	169848	176077	180125	173815	179268	172976	4422	4527	3974	6941	4878	4219	4157	3147	3852	3905	4402.2
1701	169176	164416	175214	175474	169387	170441	176724	180729	174461	179923	173594	4443	4537	3988	6965	4889	4225	4174	3154	3871	3927	4417.3
1702	169791	164992	175818	176144	169972	171057	177358	181387	175086	180516	174212	4456	4561	4009	6999	4909	4238	4186	3170	3886	3939	4435.3
1703	170388	165618	176468	176764	170609	171694	177940	182039	175711	181169	174840	4477	4569	4019	7025	4922	4254	4198	3180	3900	3955	4449.9
1704	171002	166230	177084	177434	171212	172291	178562	182713	176328	181820	175468	4497	4591	4034	7050	4947	4264	4213	3192	3913	3967	4466.8
1705	171610	166852	177733	178061	171755	172914	179201	183405	177009	182465	176100	4509	4601	4045	7067	4957	4281	4223	3209	3922	3981	4479.5
1706	172274	167442	178365	178712	172347	173532	179841	184074	177655	183131	176737	4523	4624	4053	7089	4976	4296	4238	3220	3936	3989	4494.4
1707	172854	168007	179054	179310	172986	174172	180473	184756	178246	183807	177366	4537	4638	4069	7115	4993	4307	4262	3230	3944	4003	4509.8
1708	173439	168577	179665	179952	173615	174777	181105	185447	178891	184449	177992	4556	4659	4080	7141	5005	4321	4277	3244	3958	4009	4525
1709	174056	169132	180321	180575	174254	175363	181750	186078	179522	185125	178618	4568	4672	4090	7172	5016	4337	4293	3247	3977	4021	4539.3
1710	174687	169778	180953	181179	174830	175985	182446	186757	180135	185757	179251	4578	4696	4105	7211	5038	4349	4304	3259	3988	4029	4555.7
1711	175389	170370	181625	181853	175453	176634	183112	187433	180789	186401	179906	4588	4709	4124	7228	5048	4365	4314	3272	4009	4048	4570.5
1712	176028	170968	182267	182539	176115	177298	183739	188072	181476	187085	180559	4613	4724	4136	7254	5073	4374	4327	3283	4021	4064	4586.9
1713	176655	171607	182963	183213	176753	177970	184407	188773	182114	187772	181223	4626	4741	4157	7285	5091	4386	4351	3302	4036	4081	4605.6
1714	177277	172199	183616	183872	177326	178640	185060	189396	182750	188455	181859	4637	4752	4170	7317	5116	4396	4374	3310	4057	4095	4622.4
1715	177941	172806	184260	184541	177986	179304	185724	190047	183363	189161	182513	4657	4762	4183	7343	5137	4413	4386	3329	4079	4112	4640.1
1716	178557	173391	184932	185260	178645	179879	186400	190694	183970	189894	183162	4669	4782	4194	7367	5157	4428	4402	3347	4095	4131	4657.2
1717	179190	174008	185607	185908	179263	180539	187114	191313	184644	190577	183816	4683	4795	4202	7392	5187	4445	4414	3360	4117	4152	4674.7
1718	179823	174635	186246	186604	179917	181164	187727	191950	185305	191235	184461	4700	4812	4214	7413	5212	4468	4420	3371	4133	4167	4691
1719	180454	175257	186916	187235	180541	181822	188387	192618	185976	191888	185109	4711	4834	4218	7437	5226	4478	4433	3380	4146	4179	4704.2
1720	181149	175872	187602	187933	181139	182456	189048	193274	186609	192534	185762	4728	4841	4230	7462	5234	4495	4452	3392	4154	4192	4718
1721	181772	176521	188258	188637	181805	183074	189728	193931	187304	193208	186424	4739	4862	4240	7483	5254	4512	4467	3407	4169	4200	4733.3
1722	182449	177118	188984	189304	182449	183711	190420	194642	187964	193932	187097	4759	4884	4256	7509	5265	4519	4478	3413	4180	4209	4747.2
1723	183085	177765	189681	190048	183047	184397	191135	195367	188630	194577	187773	4774	4896	4265	7528	5278	4529	4483	3434	4201	4225	4761.3
1724	183756	178377	190338	190714	183736	185082	191759	196085	189276	195271	188439	4790	4915	4277	7554	5290	4551	4500	3446	4213	4233	4776.9
1725	184425	179041	191023	191445	184425	185734	192485	196796	189959	195960	189129	4810	4932	4293	7588	5308	4570	4512	3451	4223	4245	4793.2
1726	185021	179664	191704	192094	185075	186447	193169	197478	190612	196640	189790	4827	4945	4311	7605	5326	4580	4519	3462	4237	4256	4806.8
1727	185665	180303	192398	192768	185719	187075	193880	198177	191268	197335	190459	4844	4955	4325	7625	5349	4595	4531	3471	4251	4268	4821.4
1728	186330	180953	193119	193454	186356	187760	194557	198873	191984	197997	191138	4852	4971	4334	7649	5362	4611	4545	3480	4262	4282	4834.8
1729	186997	181608	193770	194133	187053	188417	195231	199575	192678	198732	191819	4869	4988	4353	7663	5378	4626	4560	3489	4269	4307	4850.2
1730	187653	182262	194517	194804	187716	189111	195941	200280	193417	199398	192510	4887	5003	4366	7677	5395	4637	4577	3494	4281	4322	4863.9
1731	188335	182920	195197	195534	188358	189825	196639	200973	194136	200073	193199	4901	5013	4378	7692	5416	4646	4586	3504	4299	4327	4876.2
1732	189043	183542	195881	196302	188990	190537	197359	201699	194856	200748	193896	4913	5034	4393	7720	5432	4658	4607	3515	4306	4336	4891.4
1733	189704	184169	196545	196998	189651	191260	198090	202371	195613	201428	194583	4929	5061	4409	7743	5453	4666	4626	3517	4311	4349	4906.4
1734	190384	184802	197264	197666	190303	191968	198825	203080	196348	202164	195280	4940	5084	4428	7755	5477	4685	4639	3531	4322	4360	4922.1
1735	191027	185487	197953	198296	190979	192711	199552	203794	197086	202905	195979	4965	5099	4438	7773	5488	4699	4653	3538	4329	4374	4935.6
1736	191694	186131	198664	199045	191651	193447	200172	204481	197761	203637	196668	4980	5122	4458	7798	5502	4715	4667	3553	4340	4384	4951.9
1737	192399	186822	199334	199739	192310	194143	200871	205226	198490	204325	197366	4998	5151	4480	7827	5509	4734	4685	3574	4361	4402	4972.1
1738	193077	187463	200099	200479	193014	194835	201575	205998	199198	205095	198083	5014	5165	4488	7850	5516	4757	4708	3582	4377	4425	4988.2
1739	193802	188134	200832	201168	193703	195549	202331	206718	199898	205792	198793	5027	5179	4506	7873	5527	4769	4727	3598	4393	4434	5003.3
1740	194460	188743	201515	201877	194360	196240	203051	207451	200595	206545	199484	5042	5198	4523	7901	5544	4800	4734	3613	4404	4444	5020.3
1741	195142	189430	202189	202624	195032	196919	203791	208165	201337	207278	200191	5056	5218	4545	7939	5559	4816	4746	3621	4412	4452	5036.4
1742	195871	190161	202914	203322	195680	197633	204566	208927	202067	208028	200917	5068	5230	4561	7969	5574	4829	4760	3634	4425	4464	5051.4
1743	196513	190840	203609	204085	196397	198295	205291	209691	202804	208762	201629	5095	5249	4572	7999	5601	4843	4773	3641	4437	4477	5068.7
1744	197193	191568	204328	204827	197038	199013	205991	210442	203526	209499	202342	5117	5263	4588	8014	5620	4859	4795	3657	4449	4495	5085.7
1745	197846	192266	205096	205578	197704	199725	206708	211171	204234	210190	203052	5123	5281	4613	8039	5641	4872	4818	3663	4463	4507	5102
1746	198541	192900	205774	206291	198390	200432	207424	211917	204940	210956	203756	5141	5301	4627	8068	5660	4881	4834	3675	4480	4526	5119.3
1747	199233	193566	206498	207016	199017	201085	208207	212704	205621	211738	204468	5152	5318	4638	8091	5682	4904	4852	3691	4491	4538	5135.7
1748	199924	194241	207224	207765	199725	201804	208920	213430	206359	212483	205188	5169	5335	4645	8110	5702	4929	4866	3699	4507	4555	5151.7
1749	200634	194932	208005	208439	200447	202541	209663	214199	207050	213243	205915	5180	5356	4657	8137	5715	4942	4879	3705	4518	4565	5165.4
1750	201404	195589	208755	209190	201209	203283	210372	214937	207769	213993	206650	5202	5376	4673	8165	5736	4959	4892	3716	4537	4585	5184.1
1751	202152	196285	209495	209908	201967	203992	211123	215686	208565	214774	207395	5221	5406	4689	8195	5766	4979	4912	3731	4554	4604	5205.7
1752	202841	196968	210236	210574	202651	204683	211904	216488	209309	215554	208121	5236	5429	4710	8215	5785	4994	4926	3738	4573	4627	5223.3
1753	203528	197668	210968	211347	203418	205433	212633	217269	210012	216317	208859	5254	5440	4717	8241	5802	5007	4938	3760	4590	4634	5238.3
1754	204270	198381	211714	212100	204137	206179	213393	217999	210765	217083	209602	5276	5457	4735	8259	5817	5021	4952	3769	4608	4644	5253.8
1755	205006	199083	212477	212853	204810	206913	214147	218735	211502	217870	210340	5302	5472	4753	8276	5835	5037	4978	3786	4619	4659	5271.7
1756	205702	199830	213230	213596	205540	207665	214874	219555	212241	218571	211080	5320	5478	4772	8298	5856	5054	5004	3800	4629	4672	5288.3
1757	206463	200575	213933	214348	206282	208417	215605	220344	213007	219378	211835	5346	5502	4790	8323	5872	5071	5018	3819	4638	4681	5306
1758	207205	201298	214611	215094	207030	209125	216386	221143	213753	220135	212578	5364	5519	4805	8343	5887	5094	5033	3828	4655	4697	5322.5
1759	207907	202043	215379	215911	207745	209827	217144	221942	214532	220894	213332	5380	5532	4820	8378	5900	5109	5050	3839	4667	4710	5338.5
1760	208672	202772	216146	216718	208508	210557	217964	222754	215321	221702	214111	5386	5542	4836	8403	5909	5124	5069	3850	4682	4726	5352.7
1761	209423	203473	216918	217467	209205	211271	218719	223603	216129	222485	214869	5402	5556	4856	8426	5930	5144	5074	3858	4687	4738	5367.1
1762	210181	204273	217730	218282	209972	211979	219555	224402	216942	223275	215659	5417	5575	4880	8452	5945	5164	5090	3871	4702	4750	5384.6
1763	210915	205012	218538	219063	210663	212733	220342	225153	217771	224095	216428	5432	5594	4892	8470	5969	5182	5101	3886	4722	4763	5401.1
1764	211663	205743	219282	219858	211370	213450	221129	225957	218539	224895	217189	5452	5607	4904	8496	5989	5194	5119	3898	4738	4781	5417.8
1765	212413	206476	220095	220655	212138	214234	221923	226746	219301	225739	217972	5465	5619	4918	8528	6005	5203	5137	3909	4747	4796	5432.7
1766	213136	207210	220869	221457	212886	214980	222738	227621	220065	226503	218746	5478	5639	4941	8552	6021	5221	5156	3926	4768	4821	5452.3
1767	213861	207949	221581	222272	213676	215765	223540	228495	220844	227356	219534	5484	5660	4954	8582	6033	5244	5169	3941	4779	4843	5468.9
1768	214596	208698	222374	223064	214425	216482	224384	229266	221573	228115	220298	5509	5686	4973	8590	6049	5261	5183	3950	4792	4857	5485
1769	215363	209423	223175	223855	215161	217265	225178	230083	222299	228925	221073	5520	5701	4990	8625	6062	5280	5205	3961	4804	4875	5502.3
1770	216138	210207	223950	224669	215890	218014	226018	230931	223069	229775	221866	5535	5722	5011	8656	6086	5293	5228	3972	4828	4888	5521.9
1771	216908	210988	224738	225452	216605	218810	226847	231799	223871	230586	222660	5554	5751	5038	8691	6096	5305	5235	3989	4852	4902	5541.3
1772	217631	211773	225517	226292	217398	219578	227695	232661	224664	231411	223462	5577	5770	5058	8722	6115	5330	5251	3991	4868	4918	5560
1773	218472	212549	226337	227151	218180	220383	228466	233486	225429	232220	224267	5589	5786	5077	8751	6129	5345	5272	4007	4882	4931	5576.9
1774	219226	213300	227171	227905	218933	221214	229350	234282	226210	233095	225069	5612	5805	5095	8778	6154	5359	5289	4022	4897	4947	5595.8
1775	220033	214073	228031	228693	219752	221973	230128	235088	226995	233916	225868	5629	5825	5118	8806	6176	5377	5299	4032	4910	4961	5613.3
1776	220803	214883	228848	229512	220536	222792	230972	235902	227782	234741	226677	5661	5846	5136	8832	6196	5387	5314	4042	4931	4979	5632.4
1777	221588	215668	229669	230380	221366	223600	231775	236733	228596	235594	227497	5677	5862	5158	8861	6220	5402	5334	4053	4955	4993	5651.5
1778	222395	216433	230479	231273	222146	224430	232550	237559	229416	236408	228309	5704	5876	5180	8898	6239	5417	5353	4062	4973	5004	5670.6
1779	223151	217220	231303	232095	222979	225206	233411	238468	230250	237239	229132	5711	5895	5191	8939	6266	5436	5371	4084	4992	5017	5690.2
1780	223922	217978	232111	232970	223770	226020	234286	239378	231067	238073	229958	5732	5922	5205	8966	6282	5459	5377	4096	5005	5036	5708
1781	224700	218787	232916	233740	224558	226843	235128	240224	231924	238934	230775	5750	5936	5223	9001	6302	5468	5392	4105	5029	5055	5726.1
1782	225535	219536	233756	234570	225329	227570	235974	241070	232809	239775	231592	5769	5972	5237	9034	6325	5484	5414	4119	5048	5069	5747.1
1783	226322	220314	234603	235395	226151	228381	236805	241953	233670	240703	232430	5790	5993	5260	9063	6347	5503	5434	4137	5063	5083	5767.3
1784	227139	221138	235417	236229	226991	229193	237617	242889	234523	241582	233272	5810	6017	5284	9099	6370	5522	5456	4144	5085	5108	5789.5
1785	227933	221915	236218	237042	227811	230066	238435	243765	235330	242413	234093	5839	6037	5302	9124	6391	5536	5472	4153	5094	5129	5807.7
1786	228774	222702	237072	237825	228581	230878	239272	244578	236076	243266	234902	5857	6059	5319	9161	6409	5555	5492	4173	5105	5148	5827.8
1787	229598	223461	237925	238666	229407	231709	240074	245481	236921	244173	235742	5875	6078	5339	9185	6438	5566	5508	4185	5118	5166	5845.8
1788	230425	224218	238760	239522	230232	232529	240941	246322	237762	245053	236576	5882	6097	5356	9214	6460	5587	5526	4192	5132	5178	5862.4
1789	231297	225038	239576	240321	231046	233405	241781	247205	238593	245907	237417	5900	6122	5377	9248	6488	5601	5546	4211	5148	5192	5883.3
1790	232125	225840	240382	241198	231894	234220	242661	248088	239459	246766	238263	5915	6135	5391	9282	6501	5616	5560	4233	5162	5210	5900.5
1791	232935	226640	241256	242129	232748	235053	243513	249040	240333	247695	239134	5935	6148	5406	9314	6529	5636	5580	4246	5183	5222	5919.9
1792	233790	227441	242155	243025	233640	235895	244373	249933	241191	248608	240005	5948	6164	5425	9337	6547	5661	5594	4255	5201	5240	5937.2
1793	234642	228284	243033	243846	234498	236729	245220	250814	242008	249539	240861	5970	6183	5439	9366	6573	5668	5605	4265	5212	5256	5953.7
1794	235438	229092	243884	244624	235385	237524	246112	251750	242837	250418	241706	6001	6209	5455	9395	6595	5689	5630	4273	5227	5279	5975.3
1795	236294	229925	244708	245531	236218	238386	246987	252716	243752	251349	242587	6020	6231	5465	9416	6616	5696	5646	4289	5246	5293	5991.8
1796	237187	230719	245617	246386	237036	239272	247901	253620	244636	252253	243463	6034	6248	5482	9460	6636	5706	5659	4303	5257	5314	6009.9
1797	238003	231584	246520	247252	237896	240095	248801	254552	245451	253138	244329	6046	6262	5498	9489	6657	5731	5678	4315	5276	5330	6028.2
1798	238830	232454	247379	248151	238727	240973	249715	255466	246365	254113	245217	6072	6282	5520	9521	6688	5745	5696	4322	5290	5351	6048.7
1799	239625	233294	248292	249053	239603	241802	250565	256391	247299	255029	246095	6091	6300	5531	9558	6713	5762	5713	4334	5306	5369	6067.7
1800	240471	234133	249160	249916	240465	242750	251410	257249	248161	255928	246964	6113	6316	5547	9591	6736	5788	5733	4345	5316	5388	6087.3
1801	241281	234933	250051	250882	241351	243623	252300	258142	249034	256874	247847	6147	6342	5569	9635	6762	5809	5756	4354	5337	5400	6111.1
1802	242168	235792	250936	251733	242209	244498	253225	259068	249990	257794	248741	6163	6361	5592	9668	6789	5835	5776	4365	5354	5421	6132.4
1803	243013	236616	251848	252659	243043	245334	254127	259963	250874	258726	249620	6195	6376	5603	9708	6815	5858	5799	4382	5366	5438	6154
1804	243932	237481	252721	253553	243923	246145	255005	260900	251772	259665	250510	6224	6388	5617	9730	6845	5876	5817	4401	5385	5459	6174.2
1805	244758	238340	253577	254433	244804	247000	255937	261862	252690	260655	251406	6247	6410	5633	9773	6861	5892	5831	4421	5405	5479	6195.2
1806	245705	239120	254497	255435	245666	247863	256911	262771	253582	261609	252316	6264	6429	5649	9811	6877	5921	5861	4433	5418	5493	6215.6
1807	246585	240028	255452	256355	246535	248742	257822	263765	254513	262570	253237	6286	6452	5667	9849	6909	5941	5874	4440	5434	5513	6236.5
1808	247460	240932	256338	257270	247414	249651	258756	264648	255418	263474	254136	6303	6474	5680	9880	6935	5957	5887	4454	5456	5543	6256.9
1809	248340	241791	257265	258185	248306	250540	259706	265589	256275	264437	255043	6321	6498	5695	9913	6956	5970	5911	4478	5478	5564	6278.4
1810	249207	242633	258175	259079	249128	251445	260619	266523	257175	265379	255936	6343	6517	5717	9939	6972	5998	5925	4486	5495	5578	6297
1811	250055	243463	259098	260061	250008	252355	261579	267447	258056	266328	256845	6364	6534	5735	9972	7005	6024	5947	4504	5514	5592	6319.1
1812	250992	244294	260013	261025	250947	253277	262497	268419	258994	267313	257777	6398	6555	5755	9997	7027	6053	5977	4518	5539	5608	6342.7
1813	251930	245102	260949	262012	251878	254196	263477	269351	259919	268289	258710	6413	6572	5774	10029	7050	6085	5993	4535	5558	5635	6364.4
1814	252887	246019	261941	262936	252793	255161	264447	270337	260933	269214	259667	6431	6600	5794	10067	7079	6102	6018	4544	5583	5656	6387.4
1815	253837	246852	262898	263813	253715	256097	265390	271361	261926	270197	260609	6444	6615	5808	10104	7099	6130	6037	4557	5601	5686	6408.1
1816	254775	247758	263876	264793	254689	256991	266303	272356	262889	271137	261557	6469	6637	5838	10134	7118	6151	6067	4570	5624	5703	6431.1
1817	255742	248660	264864	265694	255586	257866	267218	273328	263901	272084	262494	6480	6654	5852	10165	7145	6168	6086	4574	5641	5720	6448.5
1818	256666	249550	265773	266637	256568	258736	268231	274247	264820	273041	263427	6496	6673	5869	10202	7167	6191	6102	4592	5662	5742	6469.6
1819	257512	250415	266747	267609	257481	259730	269217	275267	265783	273997	264376	6508	6703	5886	10234	7182	6208	6125	4605	5684	5762	6489.7
1820	258403	251337	267682	268499	258431	260715	270175	276274	266764	274983	265326	6530	6715	5900	10262	7202	6225	6152	4616	5708	5787	6509.7
1821	259349	252266	268619	269464	259363	261598	271103	277266	267767	275970	266276	6538	6730	5918	10296	7224	6243	6164	4632	5729	5808	6528.2
1822	260276	253124	269510	270413	260321	262521	272067	278268	268663	276955	267212	6563	6753	5941	10326	7238	6273	6185	4649	5745	5827	6550
1823	261203	254053	270478	271409	261268	263470	273038	279322	269644	277920	268180	6588	6776	5963	10359	7258	6285	6205	4658	5772	5853	6571.7
1824	262134	255000	271440	272339	262201	264453	274018	280350	270602	278893	269143	6608	6795	5987	10390	7291	6305	6224	4673	5786	5879	6593.8
1825	263068	255961	272422	273306	263105	265391	275006	281377	271586	279837	270106	6634	6808	6004	10413	7308	6331	6244	4695	5797	5897	6613.1
1826	264055	256868	273376	274236	264035	266330	275962	282344	272505	280874	271058	6661	6828	6023	10441	7333	6353	6275	4710	5813	5918	6635.5
1827	265021	257755	274369	275237	264959	267261	276975	283342	273528	281888	272034	6681	6861	6042	10470	7357	6375	6293	4724	5820	5949	6657.2
1828	265951	258682	275453	276210	265982	268230	277939	284371	274504	282865	273019	6709	6874	6068	10512	7377	6397	6311	4737	5842	5966	6679.3
1829	266900	259644	276460	277267	266992	269196	278963	285419	275524	283868	274023	6731	6895	6086	10551	7406	6417	6329	4754	5866	5998	6703.3
1830	267878	260599	277453	278219	267909	270126	279951	286454	276466	284896	274995	6759	6909	6099	10582	7437	6433	6347	4771	5896	6018	6725.1
1831	268827	261604	278423	279214	268847	271069	280978	287460	277450	285948	275982	6776	6947	6111	10621	7451	6450	6369	4783	5917	6039	6746.4
1832	269814	262575	279435	280202	269841	272073	281994	288512	278468	286930	276984	6800	6973	6131	10648	7477	6468	6386	4797	5935	6059	6767.4
1833	270779	263560	280502	281223	270869	273052	283028	289549	279535	287952	278005	6815	7006	6141	10682	7504	6483	6403	4820	5957	6077	6788.8
1834	271737	264478	281591	282175	271842	274017	284001	290665	280552	288947	279000	6830	7029	6155	10722	7528	6509	6417	4833	5971	6095	6808.9
1835	272748	265460	282606	283166	272843	274998	285072	291720	281526	289954	280009	6856	7057	6173	10755	7543	6530	6438	4848	5996	6111	6830.7
1836	273625	266424	283586	284213	273851	275979	286105	292749	282501	290998	281003	6890	7085	6192	10798	7570	6550	6468	4859	6020	6125	6855.7
1837	274622	267343	284655	285250	274854	276957	287085	293844	283517	292046	282017	6908	7096	6221	10835	7597	6573	6490	4871	6042	6146	6877.9
1838	275573	268321	285692	286239	275826	277945	288090	294830	284560	293079	283016	6931	7122	6241	10872	7625	6591	6507	4891	6060	6165	6900.5
1839	276587	269290	286730	287262	276834	278903	289095	295911	285583	294158	284035	6952	7143	6263	10905	7652	6611	6532	4909	6081	6175	6922.3
1840	277601	270277	287811	288261	277883	279950	290078	297071	286599	295256	285079	6972	7165	6284	10932	7672	6636	6542	4926	6096	6191	6941.6
1841	278645	271273	288843	289297	278865	280957	291129	298213	287646	296394	286126	6998	7184	6306	10982	7691	6655	6579	4935	6115	6207	6965.2
1842	279650	272288	289865	290342	279841	282002	292151	299290	288654	297394	287148	7020	7215	6337	11019	7721	6678	6599	4952	6150	6233	6992.4
1843	280635	273260	290949	291396	280853	282972	293208	300367	289689	298532	288186	7038	7237	6360	11057	7737	6687	6622	4971	6178	6257	7014.4
1844	281649	274201	292055	292492	281915	283987	294285	301450	290685	299570	289229	7062	7263	6378	11084	7766	6710	6641	4996	6199	6274	7037.3
1845	282669	275202	293112	293443	282918	285007	295330	302495	291761	300598	290254	7095	7289	6389	11119	7787	6729	6662	5011	6212	6287	7058
1846	283673	276208	294147	294463	283934	285984	296388	303539	292791	301664	291279	7113	7311	6413	11148	7813	6752	6687	5029	6225	6307	7079.8
1847	284666	277231	295191	295565	284923	287002	297484	304630	293881	302701	292327	7146	7333	6435	11185	7846	6784	6726	5043	6246	6327	7107.1
1848	285689	278254	296259	296624	285994	288058	298574	305674	294964	303819	293391	7170	7359	6456	11213	7867	6813	6748	5058	6262	6346	7129.2
1849	286685	279287	297377	297675	287060	289124	299627	306793	296014	304872	294451	7197	7379	6479	11251	7895	6831	6768	5077	6283	6361	7152.1
1850	287697	280325	298411	298739	288093	290134	300711	307874	297052	305988	295502	7218	7397	6504	11279	7924	6856	6792	5087	6303	6383	7174.3
1851	288786	281320	299447	299808	289143	291143	301782	308990	298129	307087	296564	7239	7426	6525	11316	7954	6875	6813	5100	6321	6401	7197
1852	289800	282350	300470	300897	290177	292119	302878	310089	299180	308177	297614	7263	7447	6548	11356	7975	6903	6830	5118	6337	6421	7219.8
1853	290829	283346	301559	301929	291255	293159	304007	311179	300269	309274	298681	7290	7466	6572	11398	7999	6918	6847	5137	6348	6440	7241.5
1854	291893	284406	302671	303005	292291	294262	305105	312280	301356	310351	299762	7315	7486	6585	11438	8024	6936	6873	5161	6370	6462	7265
1855	292952	285412	303696	304057	293261	295319	306240	313410	302423	311491	300826	7335	7502	6603	11479	8053	6960	6897	5177	6386	6481	7287.3
1856	294029	286472	304755	305169	294305	296345	307346	314506	303584	312544	301906	7355	7531	6625	11513	8073	6979	6913	5187	6409	6507	7309.2
1857	295113	287466	305823	306260	295362	297392	308478	315652	304732	313660	302994	7387	7550	6652	11552	8100	7003	6946	5205	6418	6522	7333.5
1858	296175	288475	307004	307423	296405	298486	309613	316758	305818	314729	304089	7413	7572	6668	11593	8129	7022	6966	5216	6432	6543	7355.4
1859	297198	289560	308159	308561	297505	299553	310719	317855	306897	315841	305185	7435	7592	6683	11631	8158	7035	6990	5229	6462	6560	7377.5
1860	298267	290597	309257	309656	298553	300659	311903	319055	308004	316983	306293	7448	7624	6707	11663	8176	7064	7006	5248	6486	6581	7400.3
1861	299276	291700	310366	310765	299569	301763	313100	320192	309054	318164	307395	7472	7659	6727	11699	8199	7082	7023	5262	6504	6609	7423.6
1862	300394	292713	311522	311886	300652	302896	314244	321346	310159	319360	308517	7501	7685	6743	11730	8227	7100	7041	5283	6522	6631	7446.3
1863	301495	293743	312617	312956	301663	303965	315340	322479	311246	320563	309607	7525	7704	6772	11772	8253	7123	7063	5303	6536	6648	7469.9
1864	302523	294843	313828	314051	302747	305046	316486	323674	312361	321731	310729	7550	7728	6795	11807	8285	7144	7079	5319	6557	6665	7492.9
1865	303608	295966	315013	315162	303826	306117	317658	324851	313392	322897	311849	7572	7751	6812	11836	8308	7172	7102	5333	6576	6685	7514.7
1866	304702	297078	316107	316311	304960	307233	318762	326005	314508	324119	312978	7593	7784	6847	11881	8342	7191	7119	5352	6601	6701	7541.1
1867	305757	298098	317183	317484	306026	308348	319942	327154	315665	325260	314092	7617	7802	6869	11927	8370	7209	7143	5373	6628	6724	7566.2
1868	306891	299213	318327	318659	307116	309470	321086	328303	316819	326417	315230	7640	7832	6890	11977	8406	7238	7165	5394	6650	6742	7593.4
1869	307976	300222	319540	319782	308261	310600	322251	329492	317988	327580	316369	7660	7850	6910	12015	8437	7268	7186	5410	6675	6762	7617.3
1870	309126	301259	320658	320994	309347	311725	323393	330691	319147	328816	317516	7679	7880	6930	12061	8458	7288	7209	5430	6702	6787	7642.4
1871	310210	302327	321801	322177	310460	312819	324540	331871	320310	330055	318657	7703	7904	6957	12105	8487	7316	7236	5460	6726	6810	7670.4
1872	311422	303374	323027	323337	311585	313931	325794	332998	321508	331251	319823	7727	7933	6986	12147	8522	7329	7260	5473	6748	6836	7696.1
1873	312484	304518	324181	324442	312611	315030	326925	334242	322703	332437	320957	7740	7957	7004	12179	8563	7362	7278	5490	6785	6850	7720.8
1874	313555	305595	325397	325592	313763	316119	328068	335428	323898	333656	322107	7756	7978	7032	12221	8591	7383	7305	5516	6811	6885	7747.8
1875	314704	306716	326541	326803	314926	317262	329284	336670	325079	334835	323282	7783	8005	7050	12263	8625	7414	7328	5535	6832	6907	7774.2
1876	315851	307810	327819	327967	316026	318384	330424	337891	326184	336119	324448	7815	8026	7072	12307	8663	7441	7366	5559	6856	6933	7803.8
1877	316976	308980	328950	329125	317163	319581	331599	339137	327357	337309	325618	7834	8054	7091	12352	8691	7458	7400	5568	6882	6951	7828.1
1878	318123	310132	330183	330332	318229	320811	332830	340328	328506	338521	326800	7860	8087	7110	12389	8714	7472	7422	5585	6912	6962	7851.3
1879	319270	311284	331401	331534	319421	321901	334000	341597	329729	339722	327986	7892	8114	7131	12424	8744	7499	7429	5606	6937	6985	7876.1
1880	320417	312391	332649	332720	320540	323070	335135	342784	330911	340946	329156	7924	8139	7153	12462	8779	7516	7452	5626	6957	6997	7900.5
1881	321548	313539	333888	333909	321652	324249	336404	343998	332070	342164	330342	7939	8160	7188	12509	8798	7543	7467	5654	6981	7035	7927.4
1882	322710	314646	335113	335088	322793	325356	337615	345262	333321	343491	331540	7974	8188	7210	12554	8824	7564	7490	5678	7005	7051	7953.8
1883	323844	315687	336341	336263	323937	326526	338798	346444	334555	344738	332713	8004	8215	7233	12585	8851	7588	7518	5695	7025	7087	7980.1
1884	324992	316837	337529	337514	325112	327684	340023	347672	335770	345979	333911	8028	8251	7263	12623	8868	7618	7546	5708	7049	7112	8006.6
1885	326211	318035	338682	338770	326286	328912	341162	348897	336975	347183	335111	8050	8279	7293	12671	8894	7643	7568	5729	7075	7135	8033.7
1886	327381	319110	339866	339993	327471	330106	342393	350182	338153	348471	336313	8069	8299	7315	12711	8918	7663	7589	5745	7098	7157	8056.4
1887	328600	320251	341096	341260	328648	331301	343604	351461	339352	349697	337527	8095	8321	7340	12751	8940	7690	7614	5762	7124	7172	8080.9
1888	329797	321415	342311	342437	329814	332503	344853	352693	340536	350963	338732	8125	8350	7361	12799	8973	7715	7639	5779	7144	7198	8108.3
1889	330926	322557	343541	343695	330976	333664	346090	353966	341744	352196	339936	8144	8377	7384	12863	9001	7735	7660	5807	7169	7226	8136.6
1890	332056	323706	344755	344885	332107	334842	347314	355186	343016	353432	341130	8171	8398	7408	12902	9019	7761	7685	5826	7195	7253	8161.8
1891	333241	324859	346025	346095	333318	336067	348581	356455	344241	354660	342354	8199	8419	7430	12939	9045	7782	7701	5833	7202	7281	8183.1
1892	334375	326050	347278	347333	334519	337321	349869	357684	345446	355937	343581	8234	8450	7465	12970	9072	7803	7725	5854	7229	7294	8209.6
1893	335606	327144	348526	348552	335734	338481	351118	358979	346690	357195	344802	8267	8483	7488	13014	9114	7820	7749	5875	7267	7313	8239
1894	336857	328351	349813	349846	336985	339801	352376	360230	347917	358491	346067	8293	8507	7512	13052	9144	7838	7779	5892	7295	7336	8264.8
1895	338074	329519	351107	351133	338208	341011	353616	361516	349157	359727	347307	8316	8535	7541	13081	9175	7861	7810	5912	7320	7360	8291.1
1896	339261	330696	352354	352379	339374	342176	354816	362764	350441	361018	348528	8331	8553	7568	13107	9198	7880	7832	5920	7345	7370	8310.4
1897	340440	331826	353563	353645	340612	343429	356124	364018	351707	362283	349765	8364	8586	7591	13150	9220	7906	7856	5941	7365	7393	8337.2
1898	341686	332958	354808	354854	341813	344649	357425	365275	352997	363603	351007	8387	8612	7628	13201	9249	7933	7879	5957	7404	7418	8366.8
1899	342931	334118	356060	356123	343061	345876	358723	366506	354217	364940	352256	8406	8636	7652	13253	9282	7953	7907	5994	7436	7437	8395.6
1900	344148	335326	357291	357410	344312	347197	360018	367787	355436	366239	353516	8432	8664	7678	13298	9314	7983	7934	6018	7461	7462	8424.4
1901	345368	336548	358549	358637	345556	348382	361301	369145	356681	367517	354768	8455	8691	7699	13339	9345	8005	7948	6034	7484	7479	8447.9
1902	346596	337804	359832	359860	346861	349670	362611	370479	357863	368805	356038	8478	8715	7716	13392	9385	8033	7986	6060	7507	7513	8478.5
1903	347901	339008	361135	361134	348064	350953	363938	371818	359113	370197	357326	8511	8750	7736	13430	9420	8059	8014	6081	7526	7535	8506.2
1904	349153	340186	362430	362450	349320	352195	365271	373148	360416	371512	358608	8540	8780	7748	13478	9441	8081	8037	6096	7555	7554	8531
1905	350356	341403	363658	363761	350602	353504	366580	374504	361711	372850	359893	8570	8815	7776	13524	9481	8122	8066	6124	7581	7568	8562.7
1906	351591	342662	364941	365108	351856	354797	367944	375851	363055	374187	361199	8596	8847	7799	13561	9511	8156	8087	6142	7613	7599	8591.1
1907	352894	343811	366269	366414	353109	356067	369241	377184	364390	375489	362487	8614	8871	7821	13616	9534	8185	8123	6176	7643	7632	8621.5
1908	354135	345041	367651	367781	354288	357328	370550	378500	365684	376826	363778	8645	8899	7847	13657	9569	8216	8144	6194	7666	7654	8649.1
1909	355350	346226	368976	369192	355602	358539	371826	379783	366981	378098	365057	8682	8932	7877	13691	9604	8243	8173	6208	7688	7674	8677.2
1910	356558	347447	370283	370550	356897	359851	373101	381147	368287	379451	366357	8714	8956	7903	13718	9637	8268	8203	6239	7716	7698	8705.2
1911	357831	348785	371606	371998	358158	361173	374467	382522	369615	380823	367698	8744	8983	7931	13770	9679	8300	8236	6256	7731	7724	8735.4
1912	359108	349987	372941	373353	359420	362534	375798	383885	370887	382184	369010	8776	9014	7951	13827	9706	8327	8262	6275	7759	7750	8764.7
1913	360442	351235	374297	374713	360697	363888	377243	385262	372215	383542	370353	8795	9054	7976	13872	9735	8351	8295	6295	7788	7788	8794.9
1914	361747	352469	375624	376063	362018	365174	378565	386644	373533	384950	371679	8828	9089	8009	13925	9759	8379	8320	6306	7813	7812	8824
1915	362998	353750	376926	377416	363319	366442	379955	388015	374853	386268	372994	8850	9117	8032	13970	9803	8393	8353	6323	7833	7841	8851.5
1916	364264	355058	378248	378768	364556	367771	381352	389407	376223	387642	374329	8882	9143	8052	14009	9840	8439	8373	6349	7854	7870	8881.1
1917	365567	356295	379570	380167	365774	369061	382699	390801	377569	389068	375657	8903	9183	8078	14044	9876	8475	8400	6365	7876	7887	8908.7
1918	366848	357560	380962	381552	367041	370451	384014	392191	378939	390478	377004	8940	9208	8094	14083	9913	8506	8434	6376	7895	7911	8936
1919	368158	358841	382304	382975	368409	371726	385406	393585	380360	391913	378368	8972	9245	8123	14115	9935	8531	8475	6396	7933	7944	8966.9
1920	369514	360129	383645	384368	369760	373003	386772	395007	381781	393368	379735	9003	9283	8144	14166	9961	8560	8501	6422	7967	7978	8998.5
1921	370854	361451	384951	385714	371045	374347	388179	396469	383178	394717	381090	9023	9319	8166	14199	9991	8591	8520	6444	7993	8005	9025.1
1922	372198	362751	386330	387036	372400	375713	389559	397896	384534	396067	382448	9052	9346	8201	14245	10030	8607	8558	6470	8017	8026	9055.2
1923	373506	364003	387716	388449	373751	376977	390925	399395	385894	397511	383813	9080	9375	8228	14303	10080	8633	8583	6493	8038	8045	9085.8
1924	374870	365291	389036	389780	374986	378318	392297	400819	387277	398906	385158	9109	9406	8251	14361	10107	8663	8611	6524	8063	8066	9116.1
1925	376151	366565	390450	391195	376264	379694	393725	402257	388624	400247	386517	9144	9437	8280	14390	10134	8685	8650	6547	8087	8093	9144.7
1926	377447	367870	391798	392678	377657	381163	395154	403713	389995	401619	387909	9180	9473	8310	14435	10164	8715	8683	6580	8123	8119	9178.2
1927	378838	369206	393160	394117	378976	382609	396598	405153	391330	403013	389300	9209	9504	8342	14478	10189	8752	8707	6608	8154	8149	9209.2
1928	380215	370510	394613	395450	380301	383934	397981	406629	392679	404458	390677	9252	9542	8364	14537	10222	8787	8732	6630	8179	8177	9242.2
1929	381605	371877	396032	396880	381686	385296	399495	408042	394046	405983	392094	9284	9577	8395	14583	10258	8822	8766	6650	8198	8203	9273.6
1930	382962	373256	397382	398284	382996	386806	400919	409526	395405	407378	393491	9314	9612	8431	14629	10292	8851	8800	6676	8226	8222	9305.3
1931	384295	374586	398775	399715	384339	388188	402378	410921	396744	408790	394873	9349	9639	8460	14674	10337	8874	8826	6689	8252	8255	9335.5
1932	385671	375939	400193	401078	385693	389573	403819	412377	398085	410239	396267	9381	9663	8488	14714	10380	8908	8850	6716	8278	8277	9365.5
1933	386987	377311	401628	402526	387072	390959	405269	413822	399487	411725	397679	9416	9701	8504	14780	10408	8937	8875	6742	8299	8294	9395.6
1934	388344	378666	403028	403996	388492	392358	406728	415291	400882	413218	399100	9439	9725	8541	14819	10438	8960	8906	6767	8326	8320	9424.1
1935	389758	380033	404455	405466	389878	393771	408173	416790	402312	414701	400534	9467	9759	8557	14869	10469	8986	8937	6780	8353	8340	9451.7
1936	391070	381449	405923	406851	391226	395101	409597	418263	403628	416162	401927	9496	9795	8581	14933	10501	9015	8971	6803	8377	8360	9483.2
1937	392466	382835	407359	408254	392654	396529	411081	419731	405030	417684	403362	9528	9820	8618	14967	10535	9043	9007	6830	8398	8381	9512.7
1938	393917	384150	408749	409725	394091	398009	412537	421232	406417	419152	404798	9553	9850	8648	15012	10566	9067	9040	6857	8424	8408	9542.5
1939	395309	385602	410172	411183	395529	399399	414036	422741	407863	420671	406250	9581	9879	8670	15068	10613	9093	9072	6870	8446	8436	9572.8
1940	396656	386948	411603	412570	396975	400816	415548	424199	409328	422173	407682	9606	9924	8693	15122	10653	9116	9100	6889	8468	8461	9603.2
1941	398009	388386	413081	414070	398345	402273	416977	425764	410811	423683	409140	9642	9958	8728	15158	10675	9153	9133	6913	8489	8484	9633.3
1942	399482	389771	414555	415553	399746	403635	418543	427330	412211	425227	410605	9678	9991	8753	15215	10707	9180	9155	6940	8505	8502	9662.6
1943	400882	391207	416114	417086	401252	405074	419984	428844	413661	426715	412082	9710	10026	8776	15256	10741	9204	9183	6967	8533	8520	9691.6
1944	402370	392653	417654	418566	402700	406540	421466	430381	415143	428286	413576	9747	10061	8800	15306	10771	9228	9212	6987	8556	8551	9721.9
1945	403788	394068	419148	420043	404157	408036	423017	431896	416548	429807	415051	9771	10093	8832	15355	10808	9272	9236	7001	8583	8572	9752.3
1946	405230	395553	420603	421541	405603	409533	424530	433506	417987	431382	416547	9815	10113	8869	15409	10846	9303	9268	7024	8601	8601	9784.9
1947	406684	396929	422166	423064	406999	411007	426047	435013	419439	432932	418028	9842	10155	8900	15453	10887	9332	9298	7054	8622	8644	9818.7
1948	408166	398321	423689	424538	408452	412469	427551	436584	420971	434501	419524	9870	10189	8928	15508	10929	9365	9324	7084	8640	8670	9850.7
1949	409616	399723	425278	426062	409929	413907	429195	438135	422491	435973	421031	9903	10231	8950	15556	10955	9383	9346	7106	8672	8694	9879.6
1950	411140	401103	426901	427559	411308	415380	430730	439692	423981	437547	422534	9923	10262	8980	15612	10993	9415	9380	7126	8695	8726	9911.2
1951	412585	402531	428428	429117	412852	416837	432272	441282	425456	439108	424047	9950	10293	9001	15666	11031	9459	9409	7140	8722	8763	9943.4
1952	414103	403967	429932	430581	414389	418299	433791	442852	426946	440749	425561	9989	10328	9033	15704	11059	9479	9452	7169	8752	8791	9975.6
1953	415589	405404	431467	432182	415917	419772	435392	444431	428361	442348	427086	10032	10358	9066	15753	11092	9522	9479	7179	8786	8828	10009.5
1954	417087	406881	432956	433700	417423	421291	436952	446023	429829	443960	428610	10070	10380	9095	15816	11123	9564	9514	7209	8811	8855	10043.7
1955	418512	408339	434529	435214	418975	422818	438484	447604	431283	445613	430137	10114	10412	9119	15863	11160	9600	9543	7239	8829	8891	10077
1956	420072	409788	436110	436720	420492	424351	440009	449164	432822	447307	431684	10137	10439	9148	15907	11203	9630	9567	7267	8860	8914	10107.2
1957	421596	411278	437640	438316	422103	425864	441551	450761	434383	448953	433244	10150	10460	9171	15950	11243	9652	9595	7297	8887	8945	10135
1958	423085	412708	439234	439911	423665	427392	443191	452422	435925	450586	434812	10179	10499	9203	16005	11280	9683	9631	7320	8918	8972	10169
1959	424575	414193	440717	441524	425131	428967	444724	454034	437451	452233	436355	10216	10527	9225	16050	11317	9701	9656	7334	8948	9007	10198.1
1960	426147	415681	442335	443028	426565	430465	446346	455729	438880	453841	437902	10254	10564	9248	16094	11359	9731	9686	7363	8973	9039	10231.1
1961	427657	417123	443892	444582	428097	431983	448004	457465	440425	455499	439473	10289	10592	9293	16149	11402	9768	9710	7387	9008	9058	10265.6
1962	429189	418602	445513	446159	429628	433522	449566	459044	442020	457174	441042	10324	10624	9323	16196	11437	9805	9738	7406	9035	9098	10298.6
1963	430683	420111	447077	447711	431175	435031	451217	460713	443448	458723	442589	10359	10674	9352	16249	11479	9836	9767	7431	9058	9128	10333.3
1964	432228	421590	448643	449295	432723	436649	452881	462323	444964	460397	444169	10392	10695	9393	16289	11503	9877	9801	7451	9086	9164	10365.1
1965	433794	423096	450258	450979	434255	438234	454537	464017	446542	462023	445774	10430	10736	9422	16348	11541	9910	9823	7473	9123	9217	10402.3
1966	435303	424569	451965	452663	435748	439748	456142	465747	448061	463708	447365	10465	10778	9458	16399	11576	9938	9860	7486	9146	9249	10435.5
1967	436933	426113	453639	454236	437305	441338	457787	467361	449606	465401	448972	10507	10807	9487	16453	11604	9967	9899	7510	9164	9286	10468.4
1968	438504	427735	455166	455878	438855	442958	459427	469001	451156	467073	450575	10540	10836	9525	16519	11648	9999	9922	7531	9193	9318	10503.1
1969	440142	429190	456817	457540	440416	444603	461111	470707	452669	468796	452199	10573	10867	9560	16573	11683	10034	9944	7547	9229	9348	10535.8
1970	441753	430743	458421	459149	442054	446156	462783	472420	454230	470519	453823	10605	10907	9592	16628	11722	10066	9971	7564	9258	9379	10569.2
1971	443329	432237	460099	460852	443625	447760	464468	474070	455804	472130	455437	10646	10937	9635	16688	11766	10098	10003	7576	9295	9420	10606.4
1972	444944	433804	461780	462476	445251	449358	466125	475769	457334	473845	457069	10676	10971	9670	16736	11818	10136	10035	7609	9327	9452	10643
1973	446548	435355	463323	464072	446878	451023	467777	477530	458904	475567	458698	10704	11000	9704	16797	11848	10181	10072	7629	9361	9481	10677.7
1974	448167	437007	464976	465722	448448	452678	469456	479227	460576	477299	460356	10742	11032	9726	16856	11864	10220	10103	7654	9387	9514	10709.8
1975	449746	438576	466631	467411	450022	454321	471131	480908	462193	478979	461992	10771	11073	9760	16918	11898	10251	10129	7680	9415	9549	10744.4
1976	451271	440107	468287	469038	451656	455989	472876	482628	463764	480723	463634	10810	11101	9781	16973	11928	10282	10167	7705	9444	9590	10778.1
1977	452919	441697	469955	470785	453281	457599	474513	484365	465326	482416	465286	10842	11136	9817	17014	11959	10313	10200	7724	9469	9617	10809.1
1978	454489	443294	471635	472453	454888	459276	476243	486263	466981	484143	466966	10890	11170	9842	17062	12016	10351	10232	7750	9490	9644	10844.7
1979	456142	444889	473317	474133	456516	460892	477968	487946	468600	485868	468627	10936	11209	9875	17118	12064	10371	10259	7770	9524	9690	10881.6
1980	457770	446530	474948	475757	458105	462518	479693	489667	470192	487599	470278	10970	11237	9911	17179	12118	10399	10299	7802	9569	9725	10920.9
1981	459437	448140	476608	477489	459646	464185	481424	491461	471905	489412	471971	10996	11265	9951	17229	12152	10433	10330	7824	9596	9757	10953.3
1982	461028	449713	478334	479193	461298	465806	483167	493173	473563	491154	473643	11050	11310	9977	17280	12181	10450	10366	7865	9630	9791	10990
1983	462671	451371	480049	480881	462957	467520	484877	494955	475180	492986	475345	11088	11356	10007	17335	12235	10488	10402	7892	9660	9822	11028.5
1984	464320	453030	481853	482542	464588	469147	486616	496734	476878	494768	477048	11116	11400	10047	17394	12266	10547	10441	7925	9689	9846	11067.1
1985	465973	454698	483543	484267	466249	470780	488322	498504	478483	496608	478743	11157	11443	10069	17438	12299	10589	10471	7951	9739	9878	11103.4
1986	467664	456434	485347	485987	467935	472436	490150	500304	480158	498405	480482	11187	11485	10091	17492	12338	10623	10493	7965	9772	9911	11135.7
1987	469356	458141	487211	487732	469611	474153	491847	502084	481809	500262	482221	11235	11533	10126	17550	12381	10658	10530	7998	9793	9944	11174.8
1988	471110	459805	488893	489514	471239	475859	493650	503866	483455	502015	483941	11274	11563	10164	17601	12411	10693	10573	8021	9821	9985	11210.6
1989	472805	461433	490626	491258	472956	477527	495442	505657	485065	503775	485654	11319	11597	10194	17663	12454	10728	10611	8040	9857	10026	11248.9
1990	474525	463135	492357	493005	474630	479270	497208	507505	486782	505518	487394	11341	11636	10225	17739	12490	10761	10647	8059	9879	10054	11283.1
1991	476214	464790	494141	494876	476278	480996	499022	509331	488395	507281	489132	11388	11678	10253	17803	12534	10805	10697	8085	9906	10083	11323.2
1992	477888	466496	496069	496661	478065	482680	500790	511185	490033	509129	490900	11425	11735	10291	17852	12576	10832	10727	8114	9934	10116	11360.2
1993	479604	468171	497803	498530	479794	484459	502629	513064	491680	510985	492672	11465	11783	10322	17902	12624	10866	10763	8143	9973	10155	11399.6
1994	481222	469889	499558	500293	481503	486152	504503	514936	493271	512819	494415	11499	11824	10359	17964	12672	10891	10788	8172	10006	10207	11438.2
1995	482981	471596	501408	502119	483295	487877	506259	516855	494886	514708	496198	11536	11863	10393	18016	12708	10918	10820	8195	10045	10245	11473.9
1996	484705	473290	503164	503883	485000	489630	508076	518691	496564	516558	497956	11577	11889	10423	18084	12762	10950	10860	8221	10066	10276	11510.8
[truncated: 3 more rows]

## Sheet: Control+p53 RNAi (MNNG3)(c)
Control-sim (480 cells)+p53 RNAi-sim (20 cells) > MNNG3-sim+p53 RNAi-MNNG3-sim
	No of cells											No of cells
Time mi n x10	Control-sim	Control-sim	Control-sim	Control-sim	Control-sim	Control-sim	Control-sim	Control-sim	Control-sim	Control-sim	Average	p53 RNAi-sim	p53 RNAi-sim	p53 RNAi-sim	p53 RNAi-sim	p53 RNAi-sim	p53 RNAi-sim	p53 RNAi-sim	p53 RNAi-sim	p53 RNAi-sim	p53 RNAi-sim	Average
0	480	480	480	480	480	480	480	480	480	480	480	20	20	20	20	20	20	20	20	20	20	20
1	480	480	480	480	480	480	480	480	480	480	480	20	20	20	20	20	20	20	20	20	20	20
2	480	480	480	480	480	480	480	480	480	480	480	20	20	20	20	20	20	20	20	20	20	20
3	480	480	480	480	480	480	480	480	480	480	480	20	20	20	20	20	20	20	20	20	20	20
4	480	480	480	479	480	480	480	480	480	480	479.9	20	20	20	20	20	20	20	20	20	20	20
5	482	486	486	481	485	480	489	486	484	483	484.2	20	20	20	20	20	20	20	21	20	20	20.1
6	483	487	488	482	487	482	489	487	486	483	485.4	20	20	20	20	20	21	20	21	20	20	20.2
7	483	487	488	482	487	482	489	487	486	483	485.4	20	20	20	20	20	21	20	21	20	20	20.2
8	483	488	489	484	487	483	491	489	487	483	486.4	20	20	21	20	21	21	20	21	20	20	20.4
9	491	492	493	487	491	488	495	491	495	485	490.8	20	21	21	20	23	21	21	21	20	20	20.8
10	494	494	493	488	491	491	495	491	499	486	492.2	20	21	21	20	23	21	21	21	20	20	20.8
11	495	496	495	491	494	496	496	496	501	489	494.9	20	21	21	20	23	21	21	21	20	20	20.8
12	495	499	496	491	497	497	497	499	503	490	496.4	20	21	21	20	23	21	21	21	20	20	20.8
13	495	499	496	491	497	497	497	499	503	490	496.4	20	21	21	20	23	21	21	22	20	20	20.9
14	497	499	497	491	497	499	499	500	504	491	497.4	21	21	21	20	23	21	21	22	20	21	21.1
15	497	499	497	491	497	499	499	500	504	491	497.4	21	21	21	20	23	21	21	22	20	21	21.1
16	497	499	497	491	497	499	499	500	504	491	497.4	21	21	21	20	23	21	21	22	20	21	21.1
17	497	499	497	491	497	499	499	500	504	491	497.4	21	21	21	20	23	21	21	22	20	21	21.1
18	497	499	497	491	497	499	499	500	504	491	497.4	21	22	21	21	23	21	22	22	20	21	21.4
19	497	500	499	493	498	499	499	500	507	492	498.4	21	22	21	21	23	21	22	22	20	21	21.4
20	501	502	501	494	499	501	502	503	510	496	500.9	21	22	21	21	23	21	22	22	20	21	21.4
21	502	505	502	496	499	504	503	507	512	496	502.6	21	22	21	21	23	21	22	22	20	21	21.4
22	505	506	503	499	501	508	508	510	514	501	505.5	21	22	21	21	23	21	22	22	20	22	21.5
23	506	510	507	501	503	512	511	513	522	502	508.7	21	22	22	21	23	21	22	23	20	22	21.7
24	506	510	507	501	503	512	511	513	522	502	508.7	21	22	22	21	23	21	22	23	20	22	21.7
25	506	510	507	501	503	512	510	513	522	502	508.6	21	22	22	21	23	21	22	23	20	22	21.7
26	508	510	512	502	506	515	512	514	524	504	510.7	21	22	22	21	23	21	22	23	20	22	21.7
27	508	510	511	502	506	515	512	514	524	504	510.6	21	22	22	21	23	21	22	23	20	22	21.7
28	512	511	511	503	508	516	518	514	524	507	512.4	21	22	22	21	23	21	22	23	20	22	21.7
29	512	510	511	503	508	516	518	514	524	507	512.3	21	22	22	21	23	21	22	23	20	22	21.7
30	512	510	511	503	508	516	518	514	524	507	512.3	21	22	22	21	23	21	22	23	20	22	21.7
31	512	510	511	503	508	516	518	514	524	507	512.3	21	22	22	21	23	21	22	23	20	22	21.7
32	512	510	511	503	508	516	518	514	524	507	512.3	21	22	22	21	23	21	22	23	20	22	21.7
33	515	510	512	503	512	517	520	515	526	509	513.9	21	23	22	21	23	21	22	23	20	22	21.8
34	515	510	512	503	512	517	520	515	526	509	513.9	21	23	23	21	23	21	22	24	20	22	22
35	515	510	512	503	512	517	520	515	526	509	513.9	21	23	23	21	23	21	22	24	20	22	22
36	515	510	512	503	512	517	520	515	526	509	513.9	21	23	23	21	23	21	22	24	20	22	22
37	517	513	516	504	513	517	524	516	527	509	515.6	21	23	23	21	23	21	22	24	20	22	22
38	522	514	520	510	518	523	528	522	531	511	519.9	21	23	23	21	23	21	22	24	20	22	22
39	522	514	521	511	521	523	529	522	534	511	520.8	21	23	23	21	23	21	22	24	20	22	22
40	523	514	521	511	523	524	531	524	537	512	522	21	23	23	21	23	22	22	24	20	22	22.1
41	523	515	525	511	523	526	533	524	539	512	523.1	21	23	23	21	23	22	23	24	20	22	22.2
42	524	516	527	512	523	526	533	525	539	515	524	21	23	23	21	23	22	23	24	20	22	22.2
43	524	516	527	512	523	526	533	525	539	515	524	21	23	23	21	23	22	23	24	20	22	22.2
44	530	516	528	515	524	529	536	526	539	515	525.8	20	23	23	21	23	22	23	24	20	22	22.1
45	530	517	528	515	524	530	539	527	540	520	527	20	23	23	21	23	22	23	24	20	22	22.1
46	531	518	530	517	524	534	539	530	540	522	528.5	20	23	23	21	23	22	23	24	20	22	22.1
47	534	521	532	520	526	538	541	533	541	524	531	20	23	23	21	23	22	23	24	20	22	22.1
48	537	522	536	520	531	540	543	533	543	527	533.2	20	23	23	21	23	23	24	24	20	22	22.3
49	537	526	539	522	533	543	544	534	546	531	535.5	20	23	23	21	23	23	24	24	20	22	22.3
50	540	528	541	523	535	545	546	535	550	536	537.9	20	23	23	21	23	23	24	24	20	22	22.3
51	542	530	545	525	538	551	549	537	553	541	541.1	20	24	23	21	23	23	24	24	20	23	22.5
52	542	530	545	525	538	550	549	537	553	541	541	20	24	23	21	23	23	24	24	20	23	22.5
53	545	531	547	525	538	553	550	537	557	541	542.4	20	24	25	21	23	23	24	24	20	23	22.7
54	546	532	549	530	540	554	553	539	557	544	544.4	20	24	25	21	23	23	24	24	20	24	22.8
55	546	536	550	530	540	556	553	539	559	545	545.4	20	24	25	21	23	23	24	24	20	24	22.8
56	551	536	555	531	543	558	553	539	562	549	547.7	20	24	25	21	23	23	24	25	20	24	22.9
57	551	536	555	531	543	558	553	539	562	549	547.7	20	24	25	21	23	23	24	25	20	24	22.9
58	553	537	558	532	544	560	555	543	564	551	549.7	20	24	25	22	23	23	24	25	20	24	23
59	553	537	558	532	544	560	555	543	564	551	549.7	20	24	25	22	23	23	24	25	20	24	23
60	555	541	561	536	545	562	557	546	565	552	552	20	24	25	23	23	24	24	25	20	24	23.2
61	557	541	561	535	547	564	560	548	567	552	553.2	20	24	25	23	23	24	24	25	20	24	23.2
62	557	541	561	535	547	564	560	548	567	552	553.2	20	24	25	24	23	24	24	25	20	24	23.3
63	560	542	561	537	547	565	560	549	568	552	554.1	20	24	26	24	23	24	24	25	20	24	23.4
64	563	544	561	543	549	567	563	551	571	559	557.1	20	24	26	24	24	24	24	25	20	24	23.5
65	564	545	564	546	550	570	563	552	573	559	558.6	20	24	26	24	24	24	24	25	20	24	23.5
66	565	546	566	548	550	570	565	554	579	559	560.2	21	24	26	24	24	24	25	25	20	24	23.7
67	567	548	569	550	551	572	566	555	583	560	562.1	21	25	26	24	24	24	25	25	20	24	23.8
68	569	551	574	554	553	572	567	558	584	563	564.5	21	25	26	24	24	24	25	25	20	24	23.8
69	570	557	577	557	557	576	569	561	587	568	567.9	21	25	26	24	24	24	25	25	20	24	23.8
70	575	563	581	562	563	582	573	564	590	573	572.6	21	25	26	24	25	24	25	25	20	24	23.9
71	575	563	581	562	563	582	573	564	590	573	572.6	21	25	26	24	25	24	25	25	20	24	23.9
72	575	563	581	562	563	582	573	564	590	573	572.6	21	25	27	24	25	25	25	25	20	24	24.1
73	575	563	581	562	563	582	573	564	590	573	572.6	21	25	27	24	25	25	25	25	20	24	24.1
74	575	569	582	563	566	584	576	568	594	576	575.3	21	25	28	24	25	27	25	25	20	24	24.4
75	575	570	583	564	570	587	579	572	596	576	577.2	21	25	28	24	25	27	25	25	20	24	24.4
76	575	575	583	565	570	588	579	572	598	578	578.3	22	26	28	24	25	27	25	25	20	24	24.6
77	575	575	583	565	570	588	578	572	598	578	578.2	23	26	28	24	25	27	25	25	20	24	24.7
78	578	579	584	568	577	588	582	573	599	578	580.6	23	26	28	24	25	27	25	25	20	24	24.7
79	578	579	583	568	577	588	582	573	599	578	580.5	23	26	28	25	25	27	25	25	20	24	24.8
80	579	580	583	568	578	588	582	573	599	579	580.9	23	26	27	25	25	27	25	25	20	24	24.7
81	579	580	583	568	578	588	582	573	598	579	580.8	23	26	27	25	25	27	25	25	20	24	24.7
82	581	580	583	572	579	590	583	575	596	579	581.8	23	26	27	26	25	27	25	25	20	24	24.8
83	582	583	583	574	581	592	583	576	597	580	583.1	23	26	27	26	25	27	25	26	20	24	24.9
84	582	583	583	574	581	592	583	576	597	580	583.1	23	26	27	26	26	27	26	26	20	24	25.1
85	584	583	587	577	585	593	583	577	600	582	585.1	23	26	27	26	26	27	26	26	20	25	25.2
86	587	586	588	577	585	594	584	580	602	583	586.6	23	26	28	26	26	27	26	26	20	26	25.4
87	589	586	588	578	586	597	584	583	603	585	587.9	23	26	28	26	26	27	26	26	21	26	25.5
88	589	586	588	578	586	597	584	583	603	585	587.9	23	26	28	26	26	27	26	26	21	26	25.5
89	590	590	588	581	590	601	584	585	603	589	590.1	23	26	28	26	26	27	26	26	21	26	25.5
90	592	592	591	587	595	604	586	587	605	594	593.3	23	26	28	26	26	28	26	26	21	26	25.6
91	591	592	591	587	595	604	586	587	605	594	593.2	23	26	28	26	26	28	26	26	21	26	25.6
92	591	592	591	587	595	604	586	587	605	593	593.1	23	26	28	26	26	28	26	26	21	26	25.6
93	596	595	593	591	598	611	588	590	605	593	596	23	26	28	26	26	28	26	26	21	26	25.6
94	596	594	593	591	598	611	588	590	605	592	595.8	23	26	28	26	26	28	26	26	21	26	25.6
95	599	597	598	595	600	611	590	592	608	596	598.6	23	26	28	26	26	28	26	26	21	25	25.5
96	602	597	599	596	601	615	591	593	610	596	600	23	26	28	26	26	28	26	26	21	25	25.5
97	603	597	600	599	602	616	593	594	612	598	601.4	23	26	28	26	26	28	26	26	21	25	25.5
98	603	602	603	602	604	618	596	595	614	599	603.6	23	26	28	26	26	28	26	26	21	25	25.5
99	605	603	605	602	605	620	597	596	614	603	605	23	26	28	26	26	29	27	26	21	26	25.8
100	607	609	609	604	608	622	599	598	616	606	607.8	23	26	29	26	26	29	27	26	21	27	26
101	607	610	609	605	608	622	602	599	617	607	608.6	23	26	29	26	26	29	27	26	21	27	26
102	607	610	609	605	608	622	601	599	617	607	608.5	23	27	29	26	26	29	27	26	21	27	26.1
103	608	611	610	609	610	623	606	601	621	609	610.8	23	27	29	26	26	29	27	27	21	27	26.2
104	608	611	610	609	610	623	606	600	621	609	610.7	23	27	29	26	26	29	27	27	21	27	26.2
105	608	613	611	610	611	624	606	602	622	611	611.8	23	27	29	26	26	29	27	27	21	28	26.3
106	613	619	613	613	613	625	609	608	627	613	615.3	23	27	29	26	26	30	27	27	21	28	26.4
107	613	619	613	613	612	625	609	608	627	613	615.2	23	27	29	26	26	31	27	27	21	28	26.5
108	615	620	616	613	618	627	612	610	628	613	617.2	23	27	29	26	26	32	27	27	22	28	26.7
109	620	621	621	616	620	629	611	615	631	614	619.8	23	27	29	26	27	32	27	27	22	28	26.8
110	620	622	622	616	622	630	611	615	633	614	620.5	23	27	29	26	27	32	27	27	22	29	26.9
111	620	622	622	616	622	629	611	615	633	614	620.4	23	27	29	26	27	32	27	27	22	29	26.9
112	620	622	622	616	622	629	611	615	633	614	620.4	23	27	29	26	27	32	27	27	22	29	26.9
113	620	622	622	616	622	629	611	615	633	614	620.4	23	27	29	26	27	32	27	27	22	29	26.9
114	620	622	622	616	622	629	611	615	633	614	620.4	23	27	29	26	27	33	27	29	22	29	27.2
115	622	628	624	619	622	633	614	619	637	617	623.5	23	27	29	26	27	33	27	29	22	29	27.2
116	622	628	624	618	622	633	614	619	637	616	623.3	24	27	29	26	27	33	27	29	22	29	27.3
117	623	633	629	622	625	634	618	619	641	618	626.2	23	27	29	26	27	33	27	29	22	29	27.2
118	623	633	629	622	625	633	618	619	641	618	626.1	23	27	30	26	27	33	27	30	22	29	27.4
119	626	640	636	630	633	641	620	621	647	618	631.2	23	27	30	26	27	33	27	30	23	29	27.5
120	627	642	637	631	635	645	622	623	650	618	633	23	27	30	26	27	33	27	30	23	29	27.5
121	637	646	640	635	639	651	630	634	656	631	639.9	23	27	30	26	27	33	27	30	23	29	27.5
122	638	649	640	636	641	651	631	636	658	632	641.2	23	27	30	26	27	33	27	30	23	29	27.5
123	638	650	641	636	644	651	631	638	660	632	642.1	23	27	30	26	27	33	27	31	24	29	27.7
124	639	652	641	637	645	654	633	638	660	632	643.1	23	27	30	26	27	33	27	31	24	29	27.7
125	640	653	647	640	650	657	634	643	663	635	646.2	23	27	31	26	27	33	27	31	26	29	28
126	643	657	647	642	656	658	636	646	665	635	648.5	23	28	31	26	27	33	27	31	27	29	28.2
127	644	660	650	646	656	659	638	649	666	636	650.4	23	28	31	26	27	33	27	31	27	29	28.2
128	647	665	656	650	657	660	641	654	673	640	654.3	23	29	31	26	27	33	27	31	27	30	28.4
129	649	669	660	652	658	662	642	656	676	644	656.8	24	29	32	26	27	33	27	32	27	30	28.7
130	653	672	661	655	662	664	645	660	679	652	660.3	24	29	32	26	27	33	27	32	28	30	28.8
131	657	674	664	659	665	664	646	662	681	659	663.1	24	29	32	26	27	33	27	32	28	30	28.8
132	660	676	670	663	669	670	653	668	682	661	667.2	24	29	32	26	27	33	27	32	28	30	28.8
133	663	678	671	666	671	675	655	673	687	667	670.6	24	29	32	26	28	33	27	32	29	30	29
134	668	680	671	671	676	678	657	672	690	667	673	24	29	32	27	28	33	27	32	29	29	29
135	671	689	674	676	679	681	664	674	696	672	677.6	24	29	32	28	28	33	28	34	29	29	29.4
136	672	693	674	680	680	684	666	677	700	672	679.8	25	29	32	29	28	33	28	34	29	29	29.6
137	673	698	675	682	683	686	667	678	702	674	681.8	25	29	32	29	28	33	28	34	29	29	29.6
138	673	698	675	682	684	686	667	679	702	676	682.2	25	29	32	29	28	33	28	34	29	29	29.6
139	674	698	675	683	684	687	670	679	703	678	683.1	25	29	32	29	28	33	28	34	29	30	29.7
140	675	700	677	684	689	689	674	679	705	678	685	25	29	32	29	28	33	28	34	29	30	29.7
141	677	701	679	684	691	690	679	680	707	678	686.6	25	29	32	29	28	33	28	34	29	30	29.7
142	677	704	679	685	693	693	683	683	709	681	688.7	26	29	32	29	29	33	28	34	29	30	29.9
143	680	710	681	687	694	696	685	686	712	684	691.5	26	29	32	29	29	33	28	34	29	30	29.9
144	681	711	684	689	695	698	688	688	715	687	693.6	26	29	32	29	29	33	28	34	29	30	29.9
145	681	711	685	689	695	699	688	688	715	687	693.8	26	29	32	29	29	33	28	34	29	30	29.9
146	681	713	685	689	697	700	689	692	717	688	695.1	27	29	32	29	30	33	29	34	29	30	30.2
147	681	714	686	689	697	700	690	693	718	688	695.6	27	29	32	29	31	33	29	34	29	31	30.4
148	682	717	687	691	698	700	693	694	720	690	697.2	30	29	32	29	33	35	29	34	30	31	31.2
149	683	719	691	692	700	702	697	696	722	693	699.5	30	29	32	29	33	35	30	34	30	31	31.3
150	683	720	691	692	700	702	697	696	722	693	699.6	30	29	32	29	33	35	30	34	30	31	31.3
151	685	723	692	695	701	705	697	699	723	695	701.5	30	29	32	29	33	35	29	34	30	31	31.2
152	687	724	694	698	705	707	698	700	725	696	703.4	30	30	32	29	34	35	29	34	32	31	31.6
153	690	728	694	700	707	708	700	700	728	696	705.1	30	30	32	29	34	35	30	34	32	31	31.7
154	700	733	697	705	711	713	703	706	733	699	710	30	30	32	29	35	35	30	35	32	33	32.1
155	701	733	699	709	712	714	704	707	735	700	711.4	30	30	32	29	34	35	30	35	32	33	32
156	704	737	702	715	717	720	709	707	742	707	716	30	31	32	29	34	35	30	35	32	33	32.1
157	706	742	708	718	720	724	713	712	750	709	720.2	30	31	32	29	34	35	30	35	32	33	32.1
158	707	741	708	718	720	725	713	712	751	709	720.4	31	31	32	29	34	35	30	35	33	33	32.3
159	713	745	709	718	721	727	716	716	754	713	723.2	31	31	32	29	34	35	30	35	33	33	32.3
160	717	749	711	718	720	729	717	720	758	716	725.5	31	31	32	29	34	35	30	35	33	33	32.3
161	721	749	717	722	726	731	722	722	759	718	728.7	31	31	32	29	35	35	30	35	33	33	32.4
162	726	751	724	727	734	737	725	727	769	722	734.2	31	31	32	30	35	35	30	35	33	33	32.5
163	727	753	725	729	736	739	726	730	770	723	735.8	31	31	32	30	35	35	30	35	33	33	32.5
164	728	754	725	729	736	740	727	731	769	725	736.4	32	31	32	30	35	35	30	35	33	33	32.6
165	728	757	729	733	741	744	729	734	771	728	739.4	33	31	32	30	35	36	30	35	33	33	32.8
166	729	757	729	734	742	745	730	734	772	729	740.1	33	32	32	31	36	36	30	35	33	34	33.2
167	729	759	735	738	742	746	730	736	773	730	741.8	33	32	32	31	36	36	30	36	33	34	33.3
168	737	764	740	740	748	752	740	743	774	733	747.1	33	32	33	31	36	36	30	36	34	34	33.5
169	738	765	741	741	750	754	741	746	777	734	748.7	33	32	33	31	36	36	31	36	34	34	33.6
170	738	767	741	743	752	754	743	746	778	734	749.6	34	32	33	31	36	36	31	36	34	34	33.7
171	739	767	742	743	754	755	745	747	778	735	750.5	34	32	33	31	36	36	32	36	34	34	33.8
172	749	771	745	745	758	759	754	751	781	743	755.6	34	32	33	31	36	36	32	36	34	35	33.9
173	749	773	746	745	761	759	755	752	782	744	756.6	34	33	34	31	36	36	32	36	34	35	34.1
174	749	775	746	745	763	759	756	752	783	744	757.2	34	33	34	31	37	37	33	37	35	35	34.6
175	750	776	746	745	764	759	760	752	784	745	758.1	34	33	34	31	37	37	33	37	35	35	34.6
176	752	776	747	745	764	759	763	752	785	745	758.8	34	33	35	31	37	37	33	37	35	35	34.7
177	755	778	750	747	768	763	766	753	786	745	761.1	34	33	35	31	37	38	33	37	35	35	34.8
178	755	781	752	751	773	766	767	755	788	750	763.8	34	34	35	31	37	38	33	37	35	35	34.9
179	758	783	752	753	775	766	770	760	790	751	765.8	34	34	35	31	38	38	33	38	36	35	35.2
180	762	784	756	755	777	769	772	765	793	753	768.6	34	34	35	31	38	38	33	38	36	35	35.2
181	765	786	758	758	777	773	774	765	794	753	770.3	34	34	35	31	38	38	33	38	35	35	35.1
182	766	789	759	758	782	777	775	769	800	757	773.2	34	35	35	31	38	38	33	39	35	35	35.3
183	775	791	775	761	792	784	785	773	808	761	780.5	34	35	35	31	38	38	33	39	35	35	35.3
184	780	792	777	762	794	786	786	774	810	761	782.2	34	35	36	31	38	38	33	39	35	35	35.4
185	783	793	780	763	793	786	791	776	812	763	784	34	35	36	31	38	38	33	40	35	35	35.5
186	784	794	781	763	793	789	795	777	816	768	786	34	35	36	31	38	39	34	40	35	35	35.7
187	787	795	788	765	794	792	797	780	818	768	788.4	34	35	36	31	38	39	34	40	35	36	35.8
188	789	796	791	765	796	794	797	782	822	770	790.2	34	35	36	31	38	39	34	40	35	36	35.8
189	793	800	792	767	799	796	800	785	825	771	792.8	34	35	36	31	38	39	34	40	35	36	35.8
190	795	802	794	772	803	801	809	786	826	774	796.2	34	35	36	31	38	39	34	40	35	36	35.8
191	801	806	796	776	805	803	811	790	827	775	799	34	35	36	31	39	39	34	41	35	36	36
192	801	806	797	779	807	804	814	791	829	779	800.7	34	35	37	31	39	39	34	41	35	36	36.1
193	802	807	799	780	807	804	815	793	830	780	801.7	34	35	37	31	39	39	34	41	35	36	36.1
194	802	807	800	781	809	805	817	795	832	781	802.9	34	35	37	31	39	39	34	41	35	36	36.1
195	804	811	804	786	812	806	819	796	835	787	806	34	36	37	31	39	39	33	41	35	36	36.1
196	814	814	806	791	815	808	822	801	839	792	810.2	34	36	37	31	39	39	33	41	35	37	36.2
197	816	817	810	795	819	810	822	803	840	794	812.6	34	37	38	31	39	39	33	41	35	37	36.4
198	818	817	813	798	825	813	823	805	840	795	814.7	34	37	38	31	39	39	33	41	36	37	36.5
199	822	823	814	803	825	822	824	809	845	797	818.4	34	38	38	32	39	39	33	41	36	37	36.7
200	822	823	816	803	826	824	827	811	846	798	819.6	34	38	38	32	38	39	33	41	36	37	36.6
201	823	823	818	804	826	825	828	813	849	798	820.7	34	38	39	32	38	39	33	41	36	37	36.7
202	828	825	821	807	828	830	833	816	853	804	824.5	34	38	39	32	38	39	33	41	36	37	36.7
203	828	824	823	810	828	832	837	821	855	804	826.2	34	38	39	33	38	39	34	41	36	37	36.9
204	829	826	827	813	828	833	839	824	855	806	828	34	38	39	33	38	39	34	41	36	37	36.9
205	831	826	829	816	831	834	838	827	856	806	829.4	34	38	39	33	38	40	34	41	36	37	37
206	834	830	832	821	834	839	843	827	861	813	833.4	36	38	39	33	39	40	34	41	36	37	37.3
207	836	833	837	829	842	840	844	828	864	815	836.8	36	38	39	33	39	40	35	41	36	37	37.4
208	838	834	837	831	846	842	844	831	864	815	838.2	36	38	39	33	39	40	35	41	36	37	37.4
209	842	836	837	831	847	842	844	832	866	816	839.3	36	38	39	33	39	40	35	41	36	37	37.4
210	843	838	841	835	848	849	849	837	871	819	843	36	38	39	33	39	40	35	41	36	37	37.4
211	845	842	842	837	849	851	851	841	876	819	845.3	36	38	39	33	39	40	35	41	36	37	37.4
212	845	848	846	838	849	852	851	844	879	819	847.1	36	38	39	33	39	40	35	41	36	37	37.4
213	847	850	847	838	853	851	855	846	881	822	849	36	38	39	33	39	40	35	41	36	37	37.4
214	850	855	849	840	853	855	860	847	885	826	852	35	38	40	33	39	40	35	41	36	37	37.4
215	852	857	851	844	855	856	861	848	887	830	854.1	35	38	41	33	39	40	35	41	36	37	37.5
216	856	859	854	845	857	859	861	850	889	833	856.3	35	38	41	33	38	40	35	41	36	37	37.4
217	861	860	857	849	862	863	863	860	891	839	860.5	35	38	41	33	38	41	35	42	36	37	37.6
218	863	862	859	852	864	865	865	861	894	839	862.4	34	38	42	33	38	41	35	42	36	38	37.7
219	866	867	864	854	866	866	873	864	897	842	865.9	34	38	42	33	38	41	36	42	36	38	37.8
220	874	868	868	861	870	870	874	867	897	843	869.2	34	38	42	33	38	41	36	42	36	38	37.8
221	875	871	873	865	872	870	879	869	900	844	871.8	34	38	42	33	39	41	36	42	36	39	38
222	878	872	876	866	875	872	881	874	902	846	874.2	34	38	42	33	39	41	36	42	36	39	38
223	883	878	878	872	878	879	884	875	905	849	878.1	34	38	42	33	39	41	37	42	36	39	38.1
224	887	885	884	873	880	883	889	877	908	851	881.7	34	38	42	33	39	41	37	42	36	40	38.2
225	888	887	889	882	886	886	890	882	912	852	885.4	34	38	42	33	39	41	37	42	36	40	38.2
226	889	892	890	885	890	887	891	888	915	856	888.3	34	38	42	33	39	41	37	42	36	40	38.2
227	892	895	892	889	892	889	894	893	916	860	891.2	34	38	41	33	39	41	37	42	36	40	38.1
228	897	896	897	892	896	895	900	895	921	867	895.6	34	38	41	33	39	42	37	43	36	40	38.3
229	897	897	901	898	899	898	905	900	924	875	899.4	34	38	41	33	39	42	37	43	36	40	38.3
230	899	898	904	900	904	901	906	902	925	876	901.5	34	38	40	33	39	42	37	43	36	40	38.2
231	903	899	907	902	908	901	906	902	929	879	903.6	35	38	40	34	39	42	38	43	36	40	38.5
232	905	904	909	904	912	902	910	903	931	881	906.1	35	38	40	34	39	42	38	43	36	40	38.5
233	906	906	908	906	911	906	912	904	936	884	907.9	35	38	40	34	38	42	38	43	36	40	38.4
234	911	910	910	909	913	910	916	908	943	887	911.7	35	38	41	34	38	43	38	43	36	40	38.6
235	917	910	911	910	913	914	919	909	947	888	913.8	35	38	41	34	38	44	38	43	36	40	38.7
236	921	912	915	914	914	919	923	915	956	890	917.9	35	38	41	34	39	44	38	44	36	40	38.9
237	923	913	919	914	916	923	923	917	961	893	920.2	34	38	41	34	39	44	38	44	36	40	38.8
238	925	916	922	916	920	923	927	920	966	896	923.1	34	38	41	34	40	45	38	45	36	40	39.1
239	927	919	924	917	925	928	928	922	970	900	926	34	38	41	37	40	45	38	45	36	40	39.4
240	928	924	926	919	926	930	930	924	973	900	928	34	38	41	37	40	45	37	45	36	40	39.3
241	928	926	928	920	927	931	934	926	975	901	929.6	34	38	42	38	40	45	37	45	36	40	39.5
242	930	928	931	923	928	933	937	927	978	904	931.9	34	38	42	38	40	45	37	45	36	40	39.5
243	932	930	930	928	931	933	938	931	979	909	934.1	34	39	42	38	40	45	37	45	36	40	39.6
244	936	933	932	936	934	936	944	938	983	912	938.4	34	39	41	38	40	46	37	45	36	40	39.6
245	939	935	936	937	937	938	945	945	988	914	941.4	34	39	42	39	40	47	37	45	36	40	39.9
246	942	941	937	938	938	941	947	948	990	915	943.7	34	39	42	39	40	47	37	45	36	40	39.9
247	942	943	942	939	940	947	949	952	992	915	946.1	34	40	42	39	40	47	37	45	36	40	40
248	942	945	944	941	942	949	952	956	994	919	948.4	34	40	42	39	40	47	37	45	36	40	40
249	944	946	944	947	946	950	953	958	996	922	950.6	34	40	42	39	40	47	37	45	36	40	40
250	948	952	949	952	948	952	958	960	1001	925	954.5	34	40	41	39	40	47	38	45	36	40	40
251	952	954	952	954	951	953	960	965	1002	928	957.1	34	40	41	40	40	48	38	45	36	41	40.3
252	957	955	957	957	952	955	963	967	1006	931	960	34	40	41	39	40	48	38	46	36	41	40.3
253	962	960	963	960	955	964	966	969	1013	934	964.6	34	40	41	39	40	50	38	46	36	41	40.5
254	964	967	967	960	957	969	967	969	1018	940	967.8	34	41	41	39	40	50	38	46	36	41	40.6
255	967	968	973	961	960	972	970	972	1025	942	971	35	41	43	39	41	50	38	46	36	41	41
256	968	976	974	962	961	974	972	973	1025	945	973	35	41	43	39	41	50	38	46	36	42	41.1
257	967	984	978	964	966	980	975	978	1031	947	977	35	41	43	39	41	50	38	46	36	42	41.1
258	973	986	983	970	968	985	979	982	1037	952	981.5	35	41	43	40	42	50	38	46	36	42	41.3
259	973	988	984	971	970	989	982	980	1037	955	982.9	35	41	43	40	42	50	38	46	36	42	41.3
260	978	992	990	974	981	1002	984	993	1042	959	989.5	35	42	43	40	42	51	38	46	36	42	41.5
261	982	992	994	975	982	1003	988	994	1043	961	991.4	35	42	43	40	42	51	38	46	36	42	41.5
262	985	998	995	978	985	1006	987	994	1048	964	994	35	42	43	40	42	51	38	47	36	42	41.6
263	986	1001	995	978	991	1012	990	994	1048	966	996.1	35	42	43	40	42	51	38	47	36	42	41.6
264	990	1006	999	979	996	1017	992	997	1052	967	999.5	35	42	43	41	42	52	38	47	36	42	41.8
265	993	1011	1004	983	1002	1018	994	998	1056	972	1003.1	35	42	44	41	42	53	38	47	37	42	42.1
266	994	1017	1007	986	1004	1019	996	1001	1056	973	1005.3	35	42	46	41	42	54	38	47	37	42	42.4
267	994	1021	1010	988	1004	1019	998	1006	1061	977	1007.8	35	42	46	41	43	54	39	47	37	42	42.6
268	997	1027	1012	987	1006	1022	999	1008	1063	979	1010	35	42	46	41	43	54	39	47	37	42	42.6
269	1001	1031	1016	989	1009	1023	1004	1010	1067	983	1013.3	37	42	46	41	43	54	39	48	37	42	42.9
270	1003	1038	1019	990	1010	1025	1007	1013	1070	985	1016	37	42	46	41	44	54	39	48	37	42	43
271	1008	1040	1023	995	1015	1031	1011	1016	1073	987	1019.9	38	42	46	41	44	56	39	48	37	42	43.3
272	1009	1041	1027	997	1017	1034	1015	1020	1076	989	1022.5	39	42	46	41	44	56	39	48	37	42	43.4
273	1010	1041	1033	1000	1019	1037	1021	1021	1080	993	1025.5	40	42	46	41	45	56	39	48	37	42	43.6
274	1013	1044	1035	1009	1022	1044	1025	1023	1081	997	1029.3	40	42	46	41	45	56	39	48	37	42	43.6
275	1014	1044	1040	1011	1024	1047	1027	1028	1083	1002	1032	41	42	46	41	45	56	39	48	37	42	43.7
276	1018	1046	1041	1013	1028	1047	1027	1033	1087	1004	1034.4	41	42	46	41	45	56	39	48	38	42	43.8
277	1020	1053	1044	1017	1031	1050	1033	1034	1091	1009	1038.2	41	42	46	41	45	56	39	48	38	42	43.8
278	1021	1051	1047	1018	1032	1055	1039	1036	1093	1011	1040.3	41	42	46	41	45	55	39	48	38	42	43.7
279	1022	1056	1053	1021	1035	1060	1040	1043	1098	1018	1044.6	41	42	46	42	45	56	39	48	38	43	44
280	1026	1056	1056	1025	1039	1061	1043	1051	1104	1018	1047.9	41	42	46	42	45	57	39	48	39	43	44.2
281	1028	1064	1058	1028	1045	1066	1047	1053	1108	1024	1052.1	41	42	46	42	45	57	39	48	39	43	44.2
282	1033	1067	1060	1033	1049	1069	1050	1058	1111	1027	1055.7	41	42	46	42	45	57	40	48	39	43	44.3
283	1037	1071	1063	1033	1054	1069	1055	1061	1117	1028	1058.8	41	42	46	42	45	57	40	48	39	43	44.3
284	1040	1074	1069	1037	1055	1076	1057	1065	1120	1033	1062.6	41	42	46	41	45	58	40	49	39	43	44.4
285	1040	1075	1070	1042	1061	1078	1061	1069	1122	1038	1065.6	40	42	46	41	45	58	40	49	39	44	44.4
286	1042	1080	1070	1048	1063	1083	1067	1072	1128	1042	1069.5	40	42	47	41	45	58	40	49	39	44	44.5
287	1048	1084	1076	1052	1067	1087	1069	1080	1130	1050	1074.3	40	42	47	41	45	58	40	49	40	44	44.6
288	1053	1086	1080	1054	1069	1087	1071	1083	1135	1051	1076.9	40	42	46	40	45	58	40	49	40	44	44.4
289	1057	1090	1085	1059	1071	1092	1074	1086	1137	1051	1080.2	40	42	46	40	45	58	40	49	40	44	44.4
290	1059	1092	1089	1065	1073	1096	1076	1088	1145	1052	1083.5	41	42	46	40	46	58	40	51	40	44	44.8
291	1062	1092	1093	1069	1078	1102	1078	1094	1148	1055	1087.1	41	42	46	40	47	58	40	51	41	45	45.1
292	1064	1096	1098	1074	1083	1105	1079	1097	1150	1059	1090.5	41	42	46	40	48	58	40	52	41	45	45.3
293	1066	1099	1100	1075	1084	1110	1080	1098	1153	1063	1092.8	41	42	45	40	48	58	40	52	41	45	45.2
294	1068	1105	1105	1075	1090	1111	1082	1100	1155	1065	1095.6	41	42	45	40	48	58	40	53	41	45	45.3
295	1074	1110	1109	1082	1095	1119	1089	1101	1160	1068	1100.7	42	43	45	40	48	58	40	53	42	46	45.7
296	1076	1113	1113	1084	1099	1120	1091	1102	1166	1073	1103.7	42	43	45	40	48	58	40	53	43	46	45.8
297	1084	1117	1115	1091	1103	1122	1099	1106	1171	1077	1108.5	42	43	45	40	50	58	40	53	43	46	46
298	1089	1125	1116	1095	1112	1129	1102	1111	1178	1079	1113.6	42	44	46	40	50	59	40	53	43	48	46.5
299	1094	1127	1117	1098	1116	1131	1104	1117	1182	1080	1116.6	42	44	46	40	50	59	40	53	43	49	46.6
300	1096	1130	1120	1103	1119	1136	1105	1118	1185	1081	1119.3	42	44	46	40	50	59	41	53	43	49	46.7
301	1097	1139	1123	1105	1129	1143	1108	1125	1190	1083	1124.2	42	45	46	40	50	59	41	54	44	49	47
302	1100	1145	1126	1107	1133	1148	1111	1127	1193	1085	1127.5	44	45	46	40	52	60	41	54	44	49	47.5
303	1105	1146	1131	1111	1135	1151	1116	1133	1198	1088	1131.4	44	46	46	41	52	60	41	54	44	49	47.7
304	1107	1147	1136	1113	1140	1156	1121	1136	1201	1088	1134.5	46	46	46	42	52	60	41	54	44	49	48
305	1113	1152	1140	1120	1143	1162	1125	1140	1204	1092	1139.1	47	46	46	42	53	60	42	55	44	49	48.4
306	1117	1154	1143	1123	1149	1167	1126	1143	1208	1095	1142.5	47	47	46	41	53	61	42	55	44	49	48.5
307	1124	1160	1147	1131	1155	1169	1128	1150	1213	1100	1147.7	47	47	46	41	55	61	42	55	44	49	48.7
308	1128	1170	1152	1136	1163	1176	1134	1159	1214	1108	1154	47	47	46	41	55	61	42	55	44	49	48.7
309	1131	1175	1157	1142	1167	1183	1140	1161	1218	1109	1158.3	47	47	46	41	55	61	43	55	44	50	48.9
310	1137	1176	1167	1147	1171	1190	1147	1168	1222	1111	1163.6	46	47	46	41	56	62	43	55	45	50	49.1
311	1141	1180	1172	1152	1180	1197	1151	1176	1223	1115	1168.7	46	47	46	41	56	62	43	55	45	50	49.1
312	1147	1182	1174	1159	1185	1200	1155	1181	1230	1119	1173.2	46	48	46	41	56	62	43	58	45	50	49.5
313	1150	1186	1175	1165	1193	1202	1157	1188	1239	1126	1178.1	46	48	47	41	56	62	43	58	45	50	49.6
314	1157	1189	1180	1174	1194	1206	1158	1191	1243	1132	1182.4	46	48	47	41	55	62	43	58	46	50	49.6
315	1157	1196	1181	1177	1201	1212	1161	1193	1247	1135	1186	46	48	48	41	55	62	43	59	46	50	49.8
316	1163	1199	1183	1178	1205	1223	1166	1196	1251	1142	1190.6	47	48	48	41	56	62	43	59	46	52	50.2
317	1170	1202	1187	1185	1210	1231	1169	1200	1255	1145	1195.4	47	49	48	41	56	63	44	59	46	52	50.5
318	1177	1210	1191	1188	1214	1234	1175	1204	1261	1150	1200.4	47	49	48	41	56	63	44	61	46	52	50.7
319	1180	1213	1194	1193	1222	1238	1178	1210	1265	1153	1204.6	47	50	48	41	56	64	44	61	47	52	51
320	1185	1216	1198	1196	1226	1245	1178	1212	1272	1154	1208.2	47	50	48	42	56	64	44	62	46	52	51.1
321	1190	1220	1207	1207	1235	1249	1183	1215	1275	1161	1214.2	47	50	48	42	58	64	44	62	46	52	51.3
322	1197	1225	1212	1215	1238	1255	1190	1217	1278	1162	1218.9	48	50	48	42	58	64	44	63	46	52	51.5
323	1202	1228	1216	1222	1242	1256	1197	1222	1283	1166	1223.4	48	50	48	43	58	64	45	63	46	52	51.7
324	1208	1240	1221	1230	1244	1260	1202	1227	1286	1171	1228.9	48	51	48	43	58	65	46	64	46	52	52.1
325	1214	1245	1227	1230	1250	1271	1207	1233	1291	1175	1234.3	48	51	48	43	58	65	46	64	46	52	52.1
326	1223	1252	1235	1235	1257	1274	1212	1238	1302	1181	1240.9	48	51	49	43	58	66	46	64	46	52	52.3
327	1229	1257	1244	1239	1263	1276	1218	1242	1306	1189	1246.3	49	51	51	45	60	66	46	64	46	52	53
328	1235	1263	1246	1243	1267	1284	1222	1244	1308	1191	1250.3	50	51	51	45	60	66	46	64	47	53	53.3
329	1243	1271	1255	1246	1269	1288	1227	1247	1312	1196	1255.4	51	51	51	45	60	66	46	64	47	53	53.4
330	1247	1277	1256	1247	1275	1291	1229	1251	1320	1199	1259.2	51	52	54	45	60	66	46	65	48	54	54.1
331	1253	1281	1260	1251	1279	1296	1235	1255	1324	1203	1263.7	51	52	54	46	60	66	46	65	48	54	54.2
332	1259	1282	1266	1252	1283	1300	1238	1261	1330	1207	1267.8	51	53	54	46	59	66	47	66	48	54	54.4
333	1265	1287	1268	1257	1285	1308	1242	1264	1339	1209	1272.4	51	53	54	46	59	66	48	66	48	54	54.5
334	1267	1296	1275	1261	1291	1312	1249	1267	1343	1216	1277.7	51	56	54	47	60	66	48	66	52	54	55.4
335	1271	1304	1277	1265	1294	1317	1256	1267	1347	1219	1281.7	51	57	54	47	60	66	48	67	53	55	55.8
336	1279	1312	1277	1270	1295	1318	1261	1271	1349	1226	1285.8	53	57	55	47	60	66	48	68	53	55	56.2
337	1284	1320	1279	1272	1297	1323	1268	1277	1354	1228	1290.2	54	57	55	47	60	66	48	68	53	55	56.3
338	1291	1321	1284	1281	1297	1329	1272	1278	1360	1238	1295.1	55	57	55	47	60	66	48	68	53	56	56.5
339	1300	1326	1288	1286	1302	1336	1276	1284	1365	1242	1300.5	55	57	56	47	60	66	48	68	53	56	56.6
340	1305	1331	1295	1290	1304	1340	1283	1290	1368	1247	1305.3	57	57	56	48	60	66	48	68	55	57	57.2
341	1314	1333	1300	1295	1313	1348	1290	1295	1372	1255	1311.5	57	58	56	48	60	68	49	69	55	57	57.7
342	1318	1335	1308	1301	1314	1351	1295	1299	1374	1263	1315.8	57	58	55	48	61	68	50	70	55	57	57.9
343	1324	1335	1314	1302	1322	1355	1302	1301	1380	1265	1320	57	57	56	48	61	68	50	69	56	57	57.9
344	1328	1345	1326	1306	1329	1360	1311	1307	1382	1269	1326.3	57	58	56	48	61	68	50	69	56	56	57.9
345	1331	1349	1335	1311	1338	1365	1314	1310	1392	1272	1331.7	58	59	56	48	61	68	50	70	57	56	58.3
346	1335	1349	1341	1316	1347	1375	1319	1311	1401	1278	1337.2	58	60	56	49	61	68	50	70	57	56	58.5
347	1337	1356	1347	1321	1352	1379	1329	1316	1408	1282	1342.7	60	61	56	50	61	68	50	70	57	56	58.9
348	1345	1357	1352	1327	1365	1382	1339	1321	1414	1290	1349.2	60	61	56	50	61	68	51	69	56	55	58.7
349	1349	1361	1356	1333	1368	1386	1342	1325	1424	1296	1354	60	61	56	49	61	68	51	70	56	55	58.7
350	1359	1368	1362	1344	1374	1390	1347	1333	1425	1303	1360.5	60	61	57	49	61	68	51	69	56	55	58.7
351	1365	1372	1364	1349	1381	1390	1350	1338	1430	1305	1364.4	59	61	57	50	61	69	51	69	56	55	58.8
352	1370	1377	1370	1353	1383	1394	1358	1348	1435	1310	1369.8	59	61	57	50	60	69	51	69	57	55	58.8
353	1374	1382	1376	1354	1389	1399	1362	1349	1436	1320	1374.1	60	61	57	50	60	69	51	69	57	55	58.9
354	1380	1387	1384	1361	1398	1402	1372	1358	1449	1321	1381.2	60	63	58	49	60	69	51	69	59	54	59.2
355	1391	1388	1387	1364	1400	1404	1379	1359	1454	1324	1385	60	63	58	49	60	69	51	69	59	54	59.2
356	1395	1398	1389	1366	1403	1407	1384	1372	1460	1333	1390.7	60	63	58	49	60	69	52	69	60	55	59.5
357	1400	1403	1394	1372	1406	1410	1387	1377	1465	1336	1395	60	63	58	49	61	69	53	71	60	55	59.9
358	1405	1409	1399	1377	1415	1414	1394	1386	1469	1342	1401	61	64	58	49	61	69	53	71	60	55	60.1
359	1411	1413	1403	1380	1420	1420	1400	1392	1477	1345	1406.1	61	64	58	49	61	69	53	71	60	56	60.2
360	1415	1418	1405	1390	1423	1425	1410	1398	1482	1351	1411.7	61	64	58	49	61	69	53	71	60	56	60.2
361	1418	1421	1413	1391	1429	1431	1411	1406	1486	1359	1416.5	61	64	58	49	61	69	53	72	59	56	60.2
362	1427	1429	1420	1397	1437	1439	1414	1409	1490	1367	1422.9	61	64	58	49	60	69	53	72	59	57	60.2
363	1430	1436	1422	1404	1439	1444	1422	1412	1496	1368	1427.3	61	63	59	49	60	69	53	72	59	57	60.2
364	1433	1441	1426	1410	1445	1446	1426	1417	1502	1372	1431.8	61	63	59	50	60	70	53	72	61	59	60.8
365	1440	1450	1433	1419	1454	1454	1435	1419	1511	1380	1439.5	62	64	59	50	60	71	53	72	61	60	61.2
366	1446	1454	1438	1422	1463	1455	1439	1425	1514	1386	1444.2	63	64	59	50	60	71	53	72	61	59	61.2
367	1449	1456	1446	1429	1471	1461	1444	1431	1522	1388	1449.7	63	64	60	50	60	71	53	73	61	59	61.4
368	1454	1461	1448	1434	1474	1466	1445	1435	1528	1390	1453.5	63	64	60	50	60	71	53	73	63	60	61.7
369	1457	1467	1455	1437	1477	1472	1452	1442	1529	1396	1458.4	63	64	60	50	60	71	53	73	62	60	61.6
370	1460	1472	1461	1444	1482	1474	1460	1445	1531	1398	1462.7	63	64	60	50	60	71	53	74	62	61	61.8
371	1465	1473	1466	1448	1487	1477	1465	1446	1534	1402	1466.3	63	64	61	50	62	71	53	75	61	61	62.1
372	1469	1479	1473	1451	1490	1485	1472	1452	1541	1408	1472	63	64	61	50	61	72	53	75	62	63	62.4
373	1477	1484	1476	1457	1491	1492	1476	1453	1547	1411	1476.4	63	64	61	51	61	72	54	76	62	64	62.8
374	1484	1490	1484	1461	1495	1495	1483	1457	1552	1417	1481.8	63	64	61	51	61	72	55	76	62	64	62.9
375	1486	1493	1487	1465	1500	1501	1487	1462	1558	1421	1486	63	63	62	51	61	72	55	76	62	64	62.9
376	1489	1501	1489	1472	1509	1506	1499	1470	1567	1428	1493	63	63	63	51	62	72	55	76	62	66	63.3
377	1496	1502	1493	1477	1517	1511	1503	1477	1574	1429	1497.9	63	63	63	52	62	72	56	76	62	67	63.6
378	1503	1506	1496	1484	1527	1516	1508	1482	1582	1436	1504	63	63	63	52	62	72	56	76	62	67	63.6
379	1508	1516	1504	1487	1532	1519	1512	1486	1589	1443	1509.6	63	63	63	52	62	72	56	76	61	67	63.5
380	1514	1520	1510	1492	1537	1525	1517	1488	1596	1448	1514.7	65	63	64	52	62	72	57	76	61	68	64
381	1521	1526	1514	1503	1541	1534	1519	1495	1603	1453	1520.9	65	64	64	52	61	72	57	76	61	68	64
382	1526	1532	1519	1512	1550	1543	1519	1502	1610	1459	1527.2	65	64	64	52	62	72	57	76	61	68	64.1
383	1534	1538	1526	1518	1554	1547	1523	1505	1616	1461	1532.2	65	64	64	53	63	72	57	77	61	69	64.5
384	1539	1548	1534	1527	1566	1552	1533	1512	1624	1472	1540.7	65	64	64	54	63	72	57	77	61	69	64.6
385	1546	1554	1535	1529	1572	1552	1537	1516	1632	1480	1545.3	65	64	64	54	63	73	57	78	60	69	64.7
386	1550	1559	1540	1535	1581	1561	1542	1520	1638	1482	1550.8	65	63	64	54	63	74	56	78	60	69	64.6
387	1553	1565	1549	1540	1589	1564	1550	1529	1640	1487	1556.6	65	63	64	54	64	74	57	78	60	69	64.8
388	1561	1573	1556	1544	1594	1571	1558	1534	1645	1494	1563	65	64	64	54	64	74	57	78	60	69	64.9
389	1569	1577	1560	1553	1596	1573	1563	1542	1649	1495	1567.7	64	64	64	54	64	75	57	78	61	69	65
390	1574	1582	1567	1556	1601	1577	1570	1548	1656	1501	1573.2	63	64	64	54	64	75	57	78	61	69	64.9
391	1576	1584	1568	1559	1603	1585	1571	1553	1656	1508	1576.3	63	64	64	54	63	76	58	78	61	71	65.2
392	1580	1586	1574	1562	1609	1593	1575	1557	1665	1511	1581.2	63	64	64	54	64	76	58	78	62	72	65.5
393	1582	1589	1582	1569	1613	1599	1581	1561	1672	1515	1586.3	63	64	64	54	64	77	58	78	62	72	65.6
394	1588	1593	1587	1577	1619	1608	1588	1565	1682	1519	1592.6	63	64	64	54	64	77	59	79	62	74	66
395	1591	1599	1590	1579	1627	1611	1599	1569	1689	1529	1598.3	62	63	64	54	64	77	59	80	62	74	65.9
396	1596	1601	1601	1586	1637	1616	1606	1573	1696	1532	1604.4	62	63	64	54	64	77	59	81	63	74	66.1
397	1603	1608	1609	1591	1642	1623	1611	1578	1699	1536	1610	62	63	64	54	64	78	60	81	63	74	66.3
398	1607	1619	1612	1596	1647	1627	1614	1583	1707	1545	1615.7	62	64	64	54	64	79	61	81	62	75	66.6
399	1611	1623	1617	1601	1652	1634	1617	1587	1714	1548	1620.4	63	64	66	55	64	79	61	81	62	75	67
400	1614	1632	1624	1603	1656	1639	1621	1596	1718	1553	1625.6	64	64	66	56	64	79	63	80	62	75	67.3
401	1618	1636	1628	1610	1659	1642	1626	1598	1728	1559	1630.4	65	64	67	56	65	79	63	80	62	75	67.6
402	1627	1639	1630	1614	1665	1643	1634	1606	1734	1566	1635.8	65	64	67	56	65	79	63	80	62	75	67.6
403	1632	1646	1638	1621	1669	1646	1637	1610	1741	1578	1641.8	65	64	67	56	65	79	63	82	62	75	67.8
404	1635	1651	1640	1624	1674	1651	1646	1613	1746	1582	1646.2	65	64	67	56	65	80	63	82	62	75	67.9
405	1642	1660	1643	1631	1677	1657	1650	1619	1750	1588	1651.7	65	64	67	56	66	80	63	82	62	76	68.1
406	1647	1662	1644	1635	1681	1661	1655	1626	1754	1593	1655.8	65	64	67	56	66	80	63	82	62	76	68.1
407	1655	1667	1648	1640	1688	1672	1658	1633	1758	1596	1661.5	65	65	67	57	66	81	63	83	62	76	68.5
408	1664	1673	1658	1646	1694	1675	1662	1639	1761	1600	1667.2	65	65	68	57	66	81	63	83	62	76	68.6
409	1666	1677	1662	1649	1698	1681	1673	1645	1768	1607	1672.6	65	65	70	58	67	82	64	83	62	76	69.2
410	1670	1690	1669	1656	1704	1691	1678	1649	1774	1614	1679.5	65	65	71	58	68	82	65	83	62	76	69.5
411	1678	1698	1676	1665	1714	1697	1681	1654	1783	1619	1686.5	65	65	71	58	68	82	65	83	62	76	69.5
412	1681	1702	1685	1674	1719	1701	1683	1663	1790	1625	1692.3	65	64	71	58	68	82	65	83	62	76	69.4
413	1688	1713	1695	1678	1724	1707	1691	1671	1794	1632	1699.3	64	64	71	59	69	81	65	83	62	76	69.4
414	1693	1719	1696	1682	1732	1714	1697	1674	1802	1636	1704.5	64	64	72	60	69	81	65	83	62	76	69.6
415	1696	1726	1698	1686	1739	1720	1702	1680	1811	1640	1709.8	64	64	72	61	69	81	65	84	63	75	69.8
416	1701	1731	1700	1689	1743	1727	1711	1687	1816	1645	1715	64	64	74	61	69	81	65	84	63	75	70
417	1703	1736	1703	1696	1750	1729	1713	1693	1819	1652	1719.4	64	64	74	61	69	82	65	84	63	75	70.1
418	1708	1740	1713	1699	1751	1735	1718	1697	1818	1657	1723.6	64	64	74	61	69	82	65	84	63	75	70.1
419	1710	1749	1719	1709	1755	1746	1723	1702	1824	1667	1730.4	64	64	74	61	69	83	65	84	63	75	70.2
420	1712	1753	1727	1716	1761	1753	1728	1706	1831	1675	1736.2	64	64	74	61	69	83	65	84	63	75	70.2
421	1714	1760	1731	1721	1764	1758	1732	1715	1837	1685	1741.7	64	64	74	62	69	84	65	84	63	75	70.4
422	1716	1770	1734	1728	1771	1764	1740	1721	1844	1687	1747.5	64	66	76	62	70	84	65	84	63	75	70.9
423	1720	1777	1738	1733	1776	1771	1744	1727	1855	1692	1753.3	64	66	76	62	71	85	65	84	63	74	71
424	1721	1786	1745	1738	1782	1785	1747	1732	1860	1696	1759.2	66	66	77	62	73	86	65	84	63	74	71.6
425	1733	1789	1751	1740	1789	1789	1755	1735	1868	1704	1765.3	66	66	78	63	74	86	65	84	63	74	71.9
426	1739	1791	1754	1744	1792	1796	1764	1741	1871	1707	1769.9	66	66	79	64	74	87	65	84	63	74	72.2
427	1744	1798	1760	1745	1795	1801	1771	1750	1881	1716	1776.1	66	66	80	64	76	90	65	84	63	74	72.8
428	1749	1800	1765	1751	1799	1806	1779	1757	1883	1724	1781.3	66	67	80	64	76	91	65	84	63	73	72.9
429	1751	1808	1773	1754	1809	1813	1787	1767	1893	1732	1788.7	66	67	80	64	76	91	65	84	63	73	72.9
430	1757	1819	1781	1759	1817	1821	1793	1772	1900	1735	1795.4	66	67	80	64	76	92	65	84	64	72	73
431	1765	1827	1783	1767	1823	1827	1803	1780	1908	1740	1802.3	65	67	80	64	76	93	64	84	65	73	73.1
432	1772	1830	1789	1774	1827	1832	1810	1790	1920	1745	1808.9	65	69	80	64	76	94	64	84	65	73	73.4
433	1777	1836	1795	1785	1830	1837	1814	1795	1925	1753	1814.7	65	69	79	64	76	94	64	84	65	73	73.3
434	1783	1847	1805	1791	1836	1841	1820	1802	1931	1759	1821.5	65	70	79	64	77	95	65	84	65	73	73.7
435	1791	1854	1808	1792	1840	1847	1824	1811	1941	1768	1827.6	65	71	79	64	79	95	66	85	65	73	74.2
436	1796	1860	1815	1802	1844	1862	1829	1818	1951	1776	1835.3	65	71	79	64	79	95	66	86	65	73	74.3
437	1806	1869	1819	1813	1849	1870	1832	1825	1960	1784	1842.7	65	72	79	64	80	95	67	86	65	73	74.6
438	1815	1874	1823	1820	1853	1879	1841	1828	1970	1785	1848.8	65	72	78	64	80	95	68	87	66	74	74.9
439	1821	1881	1835	1829	1860	1886	1847	1832	1973	1788	1855.2	65	72	79	65	80	95	68	87	66	74	75.1
440	1827	1888	1840	1833	1871	1894	1855	1837	1980	1791	1861.6	65	72	79	65	81	95	69	89	66	74	75.5
441	1836	1895	1852	1841	1878	1900	1863	1839	1990	1793	1868.7	66	73	79	65	81	95	69	90	67	74	75.9
442	1841	1900	1861	1847	1884	1904	1866	1846	1998	1798	1874.5	67	72	79	65	82	95	69	90	68	74	76.1
443	1849	1909	1870	1851	1895	1909	1872	1851	2004	1805	1881.5	67	72	79	67	82	95	69	90	68	74	76.3
444	1853	1913	1881	1859	1899	1914	1874	1857	2012	1810	1887.2	67	73	79	67	82	95	69	90	68	74	76.4
445	1859	1915	1890	1864	1905	1922	1879	1864	2020	1821	1893.9	67	73	79	67	82	96	69	90	68	75	76.6
446	1866	1925	1902	1871	1908	1931	1885	1869	2026	1826	1900.9	67	73	79	67	83	97	69	90	69	75	76.9
447	1872	1931	1911	1876	1915	1935	1893	1875	2032	1834	1907.4	67	72	78	67	85	100	69	90	70	75	77.3
448	1882	1937	1914	1886	1927	1939	1900	1889	2045	1838	1915.7	67	71	78	67	85	100	69	90	70	75	77.2
449	1889	1942	1922	1894	1930	1949	1902	1896	2052	1843	1921.9	67	71	78	67	85	100	70	91	70	75	77.4
450	1895	1951	1932	1898	1930	1953	1914	1905	2056	1849	1928.3	67	71	79	67	85	101	70	92	70	75	77.7
451	1902	1956	1942	1909	1935	1966	1917	1912	2070	1854	1936.3	66	71	81	69	85	102	71	93	70	75	78.3
452	1907	1957	1951	1918	1941	1972	1918	1916	2080	1862	1942.2	66	71	80	69	85	103	71	93	70	75	78.3
453	1911	1966	1959	1926	1948	1976	1925	1922	2085	1870	1948.8	66	71	80	69	85	104	71	93	70	76	78.5
454	1918	1974	1960	1933	1955	1981	1927	1929	2091	1878	1954.6	68	72	80	69	85	105	71	93	70	77	79
455	1927	1982	1966	1938	1966	1989	1934	1935	2102	1886	1962.5	68	72	80	69	86	106	71	93	71	77	79.3
456	1933	1986	1973	1947	1973	1990	1942	1938	2108	1895	1968.5	67	72	81	69	87	106	71	94	71	77	79.5
457	1937	1996	1979	1952	1980	2001	1950	1950	2119	1903	1976.7	67	72	81	69	87	107	71	94	71	78	79.7
458	1941	1999	1989	1961	1984	2003	1954	1955	2125	1910	1982.1	68	72	81	69	87	107	71	94	71	78	79.8
459	1949	2014	1996	1972	1989	2010	1959	1964	2132	1915	1990	68	72	81	68	87	107	71	94	71	78	79.7
460	1959	2019	2000	1975	1997	2018	1966	1972	2144	1921	1997.1	68	72	82	68	87	107	71	94	71	78	79.8
461	1964	2026	2011	1978	2006	2025	1971	1980	2158	1932	2005.1	68	72	82	70	87	108	71	95	71	78	80.2
462	1972	2035	2017	1987	2015	2034	1978	1985	2165	1938	2012.6	69	72	82	70	87	108	71	95	71	78	80.3
463	1977	2040	2023	1988	2023	2037	1985	1994	2172	1942	2018.1	72	73	82	71	87	108	71	95	71	79	80.9
464	1984	2045	2029	1992	2028	2045	1990	2008	2176	1945	2024.2	72	73	82	70	87	109	72	95	72	79	81.1
465	1997	2052	2035	2001	2033	2055	2001	2014	2183	1950	2032.1	73	73	82	70	87	109	72	95	73	79	81.3
466	2003	2057	2044	2008	2042	2060	2005	2028	2189	1952	2038.8	73	73	82	70	87	109	72	95	73	79	81.3
467	2008	2061	2053	2018	2050	2074	2018	2036	2196	1958	2047.2	73	73	82	71	87	109	72	95	74	80	81.6
468	2016	2068	2062	2024	2057	2084	2029	2046	2202	1964	2055.2	74	74	82	71	87	109	73	95	74	80	81.9
469	2023	2075	2071	2034	2064	2092	2034	2051	2208	1967	2061.9	74	74	82	71	87	109	74	96	74	80	82.1
470	2031	2080	2081	2039	2067	2095	2043	2061	2218	1973	2068.8	74	74	83	71	87	109	74	96	74	80	82.2
471	2037	2092	2090	2054	2076	2106	2051	2069	2228	1982	2078.5	74	74	84	71	88	110	74	96	74	80	82.5
472	2049	2099	2094	2063	2083	2115	2055	2077	2234	1987	2085.6	74	74	84	71	88	110	75	96	74	80	82.6
473	2062	2109	2103	2074	2094	2125	2061	2081	2244	1996	2094.9	75	73	84	71	89	110	77	96	74	80	82.9
474	2071	2119	2107	2085	2099	2133	2067	2087	2252	2002	2102.2	75	74	84	70	89	111	77	97	74	80	83.1
475	2077	2127	2112	2092	2109	2140	2083	2095	2263	2010	2110.8	75	74	84	70	89	111	77	97	74	80	83.1
476	2084	2135	2116	2104	2121	2147	2085	2100	2275	2016	2118.3	76	74	84	71	90	111	78	97	74	81	83.6
477	2095	2147	2120	2110	2129	2155	2093	2103	2285	2027	2126.4	76	74	84	71	90	111	78	97	74	81	83.6
478	2101	2151	2128	2116	2135	2163	2100	2107	2297	2029	2132.7	76	75	83	71	90	111	78	97	74	81	83.6
479	2109	2158	2143	2126	2143	2173	2111	2114	2306	2034	2141.7	77	75	83	71	90	111	78	97	75	81	83.8
480	2119	2164	2151	2133	2156	2179	2118	2121	2317	2043	2150.1	78	75	83	71	91	112	78	97	75	84	84.4
481	2125	2174	2162	2136	2164	2193	2122	2132	2326	2056	2159	78	76	83	71	93	114	78	97	75	84	84.9
482	2134	2181	2174	2142	2174	2200	2133	2140	2341	2061	2168	78	77	84	72	94	115	78	98	75	84	85.5
483	2145	2185	2185	2143	2189	2212	2137	2151	2348	2066	2176.1	78	77	84	72	94	115	79	98	75	84	85.6
484	2155	2194	2194	2150	2195	2227	2148	2161	2358	2075	2185.7	78	78	86	72	94	115	79	99	77	85	86.3
485	2162	2198	2205	2154	2203	2241	2158	2173	2368	2081	2194.3	78	79	86	72	94	115	79	100	77	86	86.6
486	2167	2203	2212	2164	2209	2250	2175	2181	2373	2090	2202.4	78	79	86	72	94	115	79	100	77	87	86.7
487	2173	2212	2226	2175	2218	2259	2185	2190	2378	2096	2211.2	78	79	86	72	94	115	79	100	77	87	86.7
488	2179	2216	2237	2179	2225	2268	2191	2200	2386	2108	2218.9	78	79	87	73	94	115	79	100	77	87	86.9
489	2189	2228	2244	2186	2232	2273	2200	2214	2396	2125	2228.7	78	79	87	73	94	116	79	100	77	87	87
490	2200	2237	2248	2201	2239	2282	2207	2222	2404	2137	2237.7	78	79	87	74	94	117	79	101	78	87	87.4
491	2209	2248	2258	2209	2243	2289	2217	2234	2414	2149	2247	78	79	88	73	94	117	79	102	78	87	87.5
492	2223	2258	2272	2218	2252	2296	2227	2242	2425	2154	2256.7	78	79	88	73	94	117	79	103	78	87	87.6
493	2232	2266	2278	2222	2257	2307	2235	2245	2438	2170	2265	78	79	88	73	94	116	78	103	78	87	87.4
494	2245	2270	2287	2232	2269	2313	2248	2250	2449	2178	2274.1	78	78	88	73	94	116	78	103	78	88	87.4
495	2254	2279	2293	2244	2275	2319	2261	2256	2460	2189	2283	78	79	88	74	95	116	78	104	79	88	87.9
496	2264	2285	2302	2247	2284	2327	2265	2262	2472	2198	2290.6	78	79	88	74	95	116	78	104	79	88	87.9
497	2279	2296	2310	2260	2297	2334	2278	2275	2485	2208	2302.2	80	79	89	74	95	116	78	104	80	88	88.3
498	2290	2304	2315	2267	2307	2341	2281	2284	2494	2218	2310.1	79	79	91	75	95	117	79	106	81	88	89
499	2297	2312	2330	2270	2311	2354	2292	2297	2500	2226	2318.9	81	80	92	76	95	117	79	107	81	89	89.7
500	2311	2319	2340	2280	2325	2358	2300	2305	2510	2231	2327.9	83	81	93	76	95	117	79	109	82	89	90.4
501	2316	2326	2348	2284	2335	2370	2309	2313	2516	2243	2336	86	81	93	77	96	117	80	110	82	90	91.2
502	2326	2338	2356	2292	2349	2376	2316	2320	2520	2255	2344.8	86	81	93	76	97	117	80	110	82	90	91.2
503	2336	2344	2369	2301	2359	2385	2321	2327	2534	2260	2353.6	88	82	93	76	98	116	81	111	82	90	91.7
504	2345	2354	2380	2307	2367	2392	2326	2339	2540	2267	2361.7	88	83	93	76	98	116	81	111	82	90	91.8
505	2355	2358	2389	2319	2376	2399	2336	2344	2547	2277	2370	88	84	93	77	98	116	81	112	82	92	92.3
506	2365	2364	2398	2327	2387	2403	2349	2350	2557	2286	2378.6	88	85	94	77	98	116	81	112	82	91	92.4
507	2373	2371	2408	2331	2398	2408	2364	2358	2566	2289	2386.6	88	85	96	76	99	116	82	113	83	91	92.9
508	2382	2380	2414	2343	2402	2419	2375	2366	2578	2298	2395.7	89	85	96	76	99	117	82	115	85	92	93.6
509	2398	2386	2417	2351	2417	2431	2378	2378	2587	2309	2405.2	89	86	99	77	102	117	82	115	85	93	94.5
510	2408	2398	2429	2359	2427	2444	2382	2387	2591	2318	2414.3	89	87	100	77	103	117	83	117	88	94	95.5
511	2415	2404	2436	2371	2439	2457	2392	2395	2599	2322	2423	92	88	100	77	103	118	83	117	88	94	96
512	2423	2414	2447	2377	2449	2468	2397	2403	2604	2330	2431.2	92	88	101	77	103	118	83	118	88	94	96.2
513	2428	2420	2458	2382	2458	2477	2407	2420	2613	2340	2440.3	94	88	103	78	103	118	83	118	89	94	96.8
514	2437	2435	2470	2391	2469	2488	2420	2434	2628	2346	2451.8	94	88	103	80	102	119	84	118	89	94	97.1
515	2450	2446	2478	2399	2477	2499	2432	2443	2638	2354	2461.6	95	89	104	80	102	121	86	118	89	94	97.8
516	2458	2463	2485	2410	2490	2511	2443	2456	2651	2362	2472.9	96	89	104	80	102	121	86	118	89	95	98
517	2475	2470	2496	2418	2499	2517	2459	2468	2666	2370	2483.8	97	89	104	78	103	121	86	118	89	96	98.1
518	2490	2477	2504	2429	2509	2520	2472	2477	2677	2376	2493.1	99	90	105	78	103	123	87	118	91	96	99
519	2506	2494	2517	2442	2515	2528	2478	2484	2685	2388	2503.7	99	89	106	78	102	124	87	118	91	96	99
520	2512	2499	2523	2450	2526	2538	2485	2498	2689	2394	2511.4	100	89	107	79	102	125	87	118	91	96	99.4
521	2524	2510	2535	2467	2532	2543	2500	2511	2709	2407	2523.8	100	90	107	79	103	125	87	118	92	96	99.7
522	2537	2519	2551	2474	2539	2550	2512	2518	2721	2419	2534	100	91	107	79	103	125	87	118	92	95	99.7
523	2548	2525	2561	2486	2554	2562	2520	2532	2733	2428	2544.9	101	91	107	79	102	125	88	118	92	96	99.9
524	2564	2534	2569	2494	2563	2569	2532	2545	2745	2443	2555.8	101	92	107	79	102	127	88	118	91	98	100.3
525	2578	2544	2579	2508	2570	2570	2545	2555	2755	2450	2565.4	102	92	107	80	102	127	88	118	92	99	100.7
526	2585	2550	2592	2517	2579	2582	2561	2561	2765	2455	2574.7	102	94	106	80	102	127	89	118	93	99	101
527	2603	2559	2597	2528	2590	2597	2566	2564	2772	2464	2584	103	94	106	80	102	127	89	120	94	99	101.4
528	2616	2571	2602	2535	2601	2604	2573	2575	2779	2476	2593.2	103	94	106	80	103	127	89	124	94	99	101.9
529	2630	2576	2613	2545	2614	2616	2583	2586	2789	2483	2603.5	103	95	106	81	103	127	89	128	96	100	102.8
530	2643	2587	2619	2553	2625	2623	2596	2593	2804	2493	2613.6	103	95	106	81	102	125	89	131	96	100	102.8
531	2651	2596	2621	2562	2641	2635	2610	2600	2817	2508	2624.1	103	95	104	81	102	127	89	132	95	101	102.9
532	2659	2603	2634	2571	2646	2645	2627	2612	2828	2522	2634.7	104	95	104	83	102	127	89	132	95	102	103.3
533	2668	2612	2645	2585	2656	2652	2634	2624	2839	2530	2644.5	104	95	105	84	102	129	89	132	96	103	103.9
534	2676	2632	2653	2601	2666	2657	2648	2632	2850	2539	2655.4	104	95	108	84	102	129	89	132	96	104	104.3
535	2690	2641	2666	2609	2679	2665	2658	2641	2856	2546	2665.1	104	95	109	85	103	129	89	133	96	104	104.7
536	2702	2652	2673	2621	2687	2671	2666	2643	2870	2557	2674.2	104	95	108	85	103	130	89	133	96	104	104.7
537	2710	2661	2683	2632	2702	2684	2677	2650	2881	2573	2685.3	105	95	108	85	103	130	89	133	96	104	104.8
538	2715	2667	2690	2640	2712	2695	2690	2657	2887	2584	2693.7	107	95	108	85	103	130	89	132	96	104	104.9
539	2724	2682	2707	2651	2727	2705	2703	2666	2899	2595	2705.9	107	95	109	85	103	130	90	131	96	104	105
540	2727	2692	2715	2662	2742	2718	2716	2681	2910	2600	2716.3	107	96	110	87	103	130	90	131	96	105	105.5
541	2738	2697	2724	2673	2751	2723	2721	2689	2921	2612	2724.9	108	97	111	87	103	130	90	131	95	105	105.7
542	2744	2703	2730	2685	2763	2734	2727	2696	2929	2623	2733.4	109	98	111	87	103	130	90	132	95	105	106
543	2748	2714	2739	2695	2782	2743	2736	2706	2941	2636	2744	110	98	113	87	103	130	90	132	96	105	106.4
544	2759	2726	2752	2701	2796	2755	2750	2711	2950	2651	2755.1	110	99	113	87	103	131	90	132	96	106	106.7
545	2771	2740	2764	2715	2810	2772	2761	2717	2959	2659	2766.8	110	100	113	89	105	131	90	132	96	106	107.2
546	2776	2751	2780	2721	2816	2786	2770	2730	2968	2666	2776.4	110	99	112	89	105	132	91	131	97	106	107.2
547	2783	2766	2787	2731	2826	2803	2783	2744	2977	2678	2787.8	110	99	112	89	105	132	92	131	98	106	107.4
548	2791	2780	2794	2743	2838	2811	2794	2762	2989	2692	2799.4	110	99	112	89	105	133	92	133	99	106	107.8
549	2795	2788	2806	2752	2843	2822	2806	2774	2995	2708	2808.9	111	99	112	89	105	133	92	134	101	107	108.3
550	2801	2800	2811	2757	2851	2834	2818	2783	3008	2720	2818.3	111	99	112	89	106	134	92	134	101	107	108.5
551	2814	2805	2824	2771	2859	2846	2828	2794	3019	2731	2829.1	111	99	112	88	106	134	94	134	100	108	108.6
552	2822	2814	2833	2777	2870	2856	2836	2803	3031	2736	2837.8	111	99	113	88	106	135	95	134	101	108	109
553	2829	2824	2838	2789	2886	2869	2849	2805	3035	2742	2846.6	111	100	113	88	107	135	96	134	101	108	109.3
554	2846	2832	2845	2797	2894	2879	2864	2811	3043	2754	2856.5	110	101	113	88	108	135	96	134	101	108	109.4
555	2860	2853	2857	2807	2909	2885	2873	2821	3055	2764	2868.4	110	101	115	89	108	136	97	134	101	108	109.9
556	2874	2860	2867	2813	2917	2898	2881	2838	3062	2778	2878.8	110	101	115	90	108	136	97	134	101	109	110.1
557	2879	2873	2874	2818	2923	2907	2892	2843	3076	2786	2887.1	110	101	115	90	109	136	97	135	101	109	110.3
558	2887	2881	2883	2831	2938	2916	2896	2857	3085	2796	2897	110	102	115	92	109	136	100	135	102	110	111.1
559	2893	2892	2895	2844	2945	2932	2905	2864	3096	2812	2907.8	110	102	116	92	109	135	100	134	102	113	111.3
560	2902	2907	2898	2856	2961	2938	2919	2874	3112	2821	2918.8	110	102	116	92	109	135	100	133	105	113	111.5
561	2913	2913	2907	2874	2970	2947	2934	2880	3116	2827	2928.1	110	103	116	92	109	136	100	134	105	113	111.8
562	2921	2924	2923	2878	2978	2956	2944	2892	3131	2840	2938.7	111	103	116	93	109	136	100	133	104	113	111.8
563	2928	2936	2931	2884	2992	2969	2961	2901	3150	2845	2949.7	111	103	116	93	109	136	101	133	104	113	111.9
564	2933	2954	2943	2897	3002	2977	2970	2913	3167	2855	2961.1	112	103	115	93	109	137	101	133	104	115	112.2
565	2950	2963	2951	2906	3012	2990	2981	2927	3176	2867	2972.3	112	103	115	93	110	137	102	133	104	115	112.4
566	2957	2972	2965	2922	3025	2995	2995	2945	3178	2875	2982.9	113	103	115	93	110	138	102	133	105	115	112.7
567	2965	2982	2980	2934	3038	3003	3008	2954	3190	2886	2994	113	103	115	93	110	140	103	134	106	115	113.2
568	2980	2990	2989	2943	3044	3012	3015	2961	3203	2892	3002.9	114	103	115	93	110	140	103	135	106	116	113.5
569	2990	3002	3000	2960	3051	3022	3022	2973	3217	2898	3013.5	114	104	114	92	110	140	103	136	106	116	113.5
570	2999	3019	3010	2965	3053	3034	3033	2983	3236	2914	3024.6	114	105	115	92	111	140	103	137	106	118	114.1
571	3008	3030	3020	2975	3060	3047	3046	2990	3250	2930	3035.6	114	107	115	93	112	142	104	138	106	118	114.9
572	3019	3039	3031	2984	3076	3060	3054	3005	3264	2941	3047.3	115	107	115	95	112	142	103	138	106	118	115.1
573	3030	3049	3037	2993	3083	3067	3063	3016	3274	2948	3056	116	108	115	96	113	142	104	138	109	120	116.1
574	3039	3054	3045	3005	3094	3075	3072	3027	3289	2960	3066	117	108	115	96	115	142	104	138	109	120	116.4
575	3047	3059	3053	3019	3108	3085	3083	3035	3302	2968	3075.9	117	108	116	96	115	143	105	139	109	119	116.7
576	3054	3069	3060	3032	3123	3102	3087	3043	3309	2981	3086	117	108	116	96	116	143	105	139	110	119	116.9
577	3062	3085	3069	3043	3135	3113	3095	3057	3325	2992	3097.6	117	109	116	96	117	144	105	140	111	120	117.5
578	3072	3095	3082	3057	3144	3120	3102	3066	3333	2999	3107	117	110	116	96	118	144	105	141	112	121	118
579	3078	3102	3092	3060	3155	3140	3111	3068	3345	3009	3116	117	110	117	96	118	144	105	141	112	121	118.1
580	3091	3112	3108	3074	3166	3152	3128	3079	3354	3017	3128.1	117	110	117	97	118	145	105	141	113	124	118.7
581	3106	3126	3117	3080	3184	3160	3142	3095	3366	3030	3140.6	117	110	118	97	118	146	107	141	115	124	119.3
582	3110	3138	3131	3088	3196	3172	3153	3112	3377	3038	3151.5	117	110	118	97	118	148	109	142	115	124	119.8
583	3119	3147	3144	3098	3206	3181	3164	3122	3392	3049	3162.2	117	110	118	97	119	148	109	144	115	124	120.1
584	3123	3157	3157	3107	3217	3193	3178	3135	3402	3053	3172.2	117	110	118	97	119	152	109	147	115	124	120.8
585	3138	3167	3169	3119	3225	3201	3189	3145	3418	3063	3183.4	117	110	118	98	119	152	109	147	115	124	120.9
586	3150	3182	3188	3129	3241	3215	3198	3154	3426	3073	3195.6	118	110	119	98	118	152	109	147	115	124	121
587	3156	3197	3199	3142	3247	3229	3206	3165	3440	3085	3206.6	118	110	120	98	118	152	110	146	115	124	121.1
588	3167	3214	3207	3153	3259	3235	3214	3173	3453	3102	3217.7	118	110	120	99	118	152	110	146	116	124	121.3
589	3178	3224	3218	3170	3271	3247	3226	3185	3462	3112	3229.3	119	111	120	100	119	153	112	147	116	124	122.1
590	3190	3241	3224	3182	3285	3255	3239	3192	3470	3118	3239.6	119	111	120	100	119	155	112	146	117	126	122.5
591	3201	3254	3235	3192	3299	3266	3246	3201	3484	3129	3250.7	119	111	120	101	119	155	113	146	117	126	122.7
592	3218	3269	3246	3203	3311	3282	3255	3212	3496	3140	3263.2	120	111	121	101	119	158	114	146	118	126	123.4
593	3231	3283	3259	3217	3319	3289	3268	3218	3505	3149	3273.8	120	111	121	103	122	157	114	148	118	126	124
594	3236	3293	3268	3229	3330	3304	3276	3230	3514	3160	3284	121	112	124	104	123	159	114	150	119	128	125.4
595	3242	3305	3283	3242	3342	3312	3282	3239	3527	3171	3294.5	121	112	124	104	124	159	114	151	118	128	125.5
596	3252	3318	3291	3254	3351	3325	3294	3250	3538	3184	3305.7	121	112	123	104	124	161	114	152	118	129	125.8
597	3263	3336	3306	3259	3364	3343	3302	3262	3553	3188	3317.6	121	114	123	104	125	161	114	153	118	130	126.3
598	3273	3350	3314	3271	3377	3353	3308	3278	3564	3202	3329	121	115	124	104	126	162	114	153	118	130	126.7
599	3284	3368	3319	3285	3390	3365	3318	3291	3579	3209	3340.8	122	116	126	104	127	163	114	154	118	131	127.5
600	3294	3377	3329	3296	3403	3378	3332	3302	3597	3224	3353.2	122	116	126	106	129	163	114	155	118	131	128
601	3306	3386	3339	3305	3415	3387	3344	3312	3605	3235	3363.4	123	116	126	107	129	164	114	155	118	131	128.3
602	3317	3395	3355	3313	3427	3400	3350	3327	3612	3244	3374	123	117	127	107	129	164	114	155	118	131	128.5
603	3326	3405	3368	3323	3438	3407	3356	3340	3624	3252	3383.9	123	118	127	106	129	165	114	155	118	131	128.6
604	3337	3413	3380	3333	3450	3416	3368	3351	3635	3257	3394	123	119	128	106	130	165	115	156	118	131	129.1
605	3347	3426	3387	3347	3457	3430	3381	3362	3654	3271	3406.2	123	119	128	106	130	165	114	158	117	132	129.2
606	3361	3430	3407	3357	3465	3443	3395	3378	3664	3277	3417.7	123	120	129	106	131	167	116	158	117	134	130.1
607	3370	3445	3412	3366	3480	3459	3408	3393	3674	3293	3430	123	121	129	105	130	168	116	160	117	134	130.3
608	3378	3455	3427	3378	3492	3467	3413	3407	3683	3301	3440.1	123	122	132	105	130	171	116	161	119	134	131.3
609	3390	3474	3439	3387	3503	3477	3423	3424	3694	3315	3452.6	123	122	132	105	130	173	117	161	119	135	131.7
610	3402	3483	3451	3403	3516	3488	3430	3440	3720	3327	3466	123	122	132	105	130	174	117	161	119	136	131.9
611	3408	3492	3463	3412	3526	3500	3439	3450	3735	3335	3476	123	122	133	105	130	173	117	162	120	135	132
612	3428	3503	3476	3420	3535	3511	3446	3457	3743	3346	3486.5	123	123	134	105	130	173	117	162	120	135	132.2
613	3445	3519	3486	3429	3546	3529	3455	3472	3755	3358	3499.4	123	124	134	105	130	173	117	163	120	136	132.5
614	3464	3541	3500	3442	3559	3546	3467	3483	3770	3366	3513.8	127	124	134	107	130	173	117	165	120	137	133.4
615	3475	3550	3522	3452	3575	3554	3472	3497	3786	3384	3526.7	127	125	134	107	131	173	117	168	119	137	133.8
616	3488	3565	3536	3474	3591	3574	3483	3509	3799	3404	3542.3	128	126	138	107	132	173	118	169	120	137	134.8
617	3505	3576	3554	3489	3604	3593	3492	3520	3820	3412	3556.5	129	127	138	108	132	176	118	169	120	137	135.4
618	3519	3586	3570	3510	3616	3605	3504	3534	3834	3424	3570.2	129	127	139	109	134	176	118	170	120	138	136
619	3527	3604	3587	3521	3627	3620	3519	3545	3844	3438	3583.2	129	127	140	109	135	175	118	170	121	138	136.2
620	3535	3610	3593	3537	3633	3634	3531	3560	3863	3447	3594.3	128	127	140	111	138	175	118	170	121	138	136.6
621	3550	3618	3606	3563	3648	3650	3552	3567	3873	3462	3608.9	128	127	141	111	140	175	118	171	121	139	137.1
622	3562	3629	3617	3577	3659	3662	3563	3580	3888	3472	3620.9	129	127	142	111	142	177	119	171	122	139	137.9
623	3573	3647	3632	3587	3676	3670	3576	3596	3897	3484	3633.8	129	127	142	110	141	178	120	171	122	140	138
624	3582	3657	3643	3601	3686	3689	3584	3607	3907	3495	3645.1	129	128	142	110	141	180	120	171	124	140	138.5
625	3589	3671	3649	3611	3699	3699	3601	3616	3924	3513	3657.2	130	128	142	110	142	180	120	171	124	140	138.7
626	3599	3681	3663	3619	3714	3715	3610	3634	3930	3519	3668.4	130	128	142	110	142	180	121	171	125	140	138.9
627	3610	3698	3686	3628	3729	3726	3621	3646	3949	3528	3682.1	130	128	143	110	142	181	122	171	125	141	139.3
628	3620	3714	3697	3641	3743	3736	3635	3655	3962	3536	3693.9	130	128	143	111	142	184	123	171	125	143	140
629	3629	3723	3712	3651	3756	3756	3646	3671	3978	3554	3707.6	131	128	143	113	144	184	124	171	126	143	140.7
630	3645	3733	3726	3663	3768	3771	3661	3689	4005	3572	3723.3	131	129	143	113	145	185	124	171	128	143	141.2
631	3666	3748	3744	3680	3781	3788	3676	3704	4019	3582	3738.8	131	129	144	113	145	187	126	171	127	144	141.7
632	3677	3760	3758	3689	3792	3801	3684	3719	4034	3597	3751.1	131	129	146	113	146	187	126	171	128	144	142.1
633	3694	3777	3775	3705	3805	3817	3702	3742	4048	3616	3768.1	131	129	145	115	146	188	127	171	128	144	142.4
634	3706	3794	3784	3715	3816	3834	3720	3750	4064	3627	3781	132	129	146	114	146	188	127	171	128	143	142.4
635	3720	3813	3798	3729	3832	3853	3736	3758	4081	3641	3796.1	132	129	146	114	146	188	127	171	130	143	142.6
636	3734	3821	3812	3744	3849	3866	3754	3773	4090	3648	3809.1	133	129	147	115	148	188	127	172	131	143	143.3
637	3745	3841	3821	3759	3870	3877	3775	3783	4107	3666	3824.4	133	130	147	116	148	190	127	173	131	145	144
638	3767	3852	3837	3763	3881	3892	3787	3804	4127	3685	3839.5	133	130	147	116	149	189	127	173	131	145	144
639	3780	3867	3850	3783	3888	3911	3804	3813	4140	3693	3852.9	133	129	148	117	150	190	128	173	131	145	144.4
640	3792	3881	3866	3792	3907	3925	3816	3828	4152	3703	3866.2	134	130	148	118	151	192	130	173	131	146	145.3
641	3811	3898	3883	3806	3921	3941	3836	3839	4166	3722	3882.3	134	130	148	118	152	192	132	173	132	148	145.9
642	3831	3916	3894	3820	3931	3952	3844	3850	4186	3733	3895.7	134	132	148	117	152	192	132	173	133	149	146.2
643	3843	3921	3910	3833	3938	3969	3854	3868	4205	3747	3908.8	134	132	148	117	152	192	133	173	134	149	146.4
644	3858	3940	3930	3859	3950	3981	3876	3886	4224	3763	3926.7	133	133	149	116	153	195	134	173	134	149	146.9
645	3870	3962	3948	3876	3965	3998	3895	3904	4237	3775	3943	134	133	149	116	154	195	134	173	134	149	147.1
646	3891	3966	3969	3887	3983	4015	3904	3925	4247	3799	3958.6	136	133	148	118	156	195	134	173	134	149	147.6
647	3913	3982	3982	3902	3992	4030	3916	3933	4263	3808	3972.1	135	133	148	118	156	196	134	174	134	149	147.7
648	3925	3999	3994	3915	4003	4048	3926	3955	4275	3826	3986.6	137	132	148	118	156	196	134	175	134	149	147.9
649	3942	4012	4006	3930	4016	4057	3934	3969	4286	3852	4000.4	137	133	150	117	157	196	135	176	135	150	148.6
650	3952	4029	4021	3946	4032	4068	3947	3982	4303	3863	4014.3	139	133	151	117	159	197	135	176	136	150	149.3
651	3965	4046	4047	3958	4047	4085	3962	3995	4324	3881	4031	140	134	151	117	159	198	135	177	137	151	149.9
652	3984	4059	4060	3973	4069	4101	3975	4010	4337	3894	4046.2	140	135	151	117	160	198	136	178	136	151	150.2
653	4003	4067	4072	3988	4086	4114	3990	4024	4345	3911	4060	141	135	153	117	160	198	136	179	136	151	150.6
654	4016	4079	4085	4003	4108	4134	4004	4037	4366	3930	4076.2	142	136	154	117	162	199	137	179	136	152	151.4
655	4021	4097	4099	4013	4117	4151	4016	4048	4387	3942	4089.1	144	136	155	117	163	199	138	179	136	152	151.9
656	4025	4109	4116	4028	4134	4164	4037	4061	4399	3956	4102.9	144	136	156	119	164	199	138	180	136	152	152.4
657	4048	4121	4130	4038	4142	4182	4057	4079	4419	3972	4118.8	144	136	155	121	164	200	138	181	136	152	152.7
658	4073	4133	4154	4054	4163	4197	4074	4091	4437	3985	4136.1	144	136	157	121	164	199	140	181	136	152	153
659	4092	4144	4167	4070	4172	4215	4086	4112	4456	3992	4150.6	144	137	158	121	164	200	141	181	138	152	153.6
660	4113	4163	4185	4087	4184	4230	4104	4126	4480	4001	4167.3	144	138	159	119	164	200	141	182	138	153	153.8
661	4128	4176	4206	4101	4201	4245	4119	4143	4491	4012	4182.2	145	138	161	121	164	201	140	182	139	156	154.7
662	4148	4190	4223	4108	4219	4262	4140	4158	4509	4033	4199	145	139	160	121	165	201	140	182	139	156	154.8
663	4172	4204	4241	4122	4235	4273	4157	4174	4527	4056	4216.1	147	139	161	122	165	202	142	182	139	155	155.4
664	4193	4219	4265	4143	4255	4281	4167	4190	4543	4069	4232.5	147	139	163	123	165	204	143	182	140	155	156.1
665	4213	4233	4276	4159	4267	4298	4175	4206	4563	4081	4247.1	147	141	165	122	165	203	143	183	141	155	156.5
666	4234	4256	4294	4175	4290	4312	4189	4224	4581	4084	4263.9	148	143	165	122	165	203	143	183	141	154	156.7
667	4252	4269	4309	4184	4305	4331	4206	4237	4605	4099	4279.7	150	143	165	123	164	204	144	183	142	156	157.4
668	4262	4285	4320	4202	4320	4343	4219	4250	4626	4116	4294.3	151	143	167	124	164	204	144	184	142	157	158
669	4287	4301	4344	4215	4337	4360	4234	4264	4650	4139	4313.1	151	143	168	124	164	204	144	184	142	158	158.2
670	4306	4313	4357	4230	4351	4379	4251	4284	4673	4149	4329.3	152	144	169	124	164	203	144	186	142	159	158.7
671	4325	4328	4377	4239	4364	4396	4262	4298	4688	4163	4344	153	145	170	124	164	203	144	187	142	158	159
672	4344	4344	4396	4250	4383	4405	4274	4315	4708	4173	4359.2	154	147	169	124	164	204	143	187	142	160	159.4
673	4363	4364	4410	4268	4393	4424	4292	4340	4724	4187	4376.5	156	148	170	124	165	204	143	189	143	161	160.3
674	4383	4378	4422	4279	4412	4438	4305	4361	4743	4213	4393.4	156	150	173	125	165	204	144	189	143	162	161.1
675	4403	4395	4437	4292	4432	4449	4319	4388	4760	4225	4410	155	151	174	125	167	204	144	190	146	162	161.8
676	4411	4413	4452	4306	4442	4465	4349	4397	4782	4241	4425.8	157	151	177	126	168	204	144	193	146	163	162.9
677	4429	4424	4475	4323	4460	4491	4370	4415	4800	4254	4444.1	157	151	181	126	168	206	145	193	146	163	163.6
678	4445	4444	4488	4339	4474	4500	4394	4428	4809	4271	4459.2	158	152	182	126	168	206	145	196	144	163	164
679	4460	4461	4505	4359	4494	4512	4409	4445	4823	4279	4474.7	158	153	182	126	169	208	145	197	144	163	164.5
680	4487	4475	4527	4374	4514	4523	4427	4460	4847	4297	4493.1	158	155	182	127	169	209	145	198	145	163	165.1
681	4502	4491	4539	4392	4533	4531	4442	4476	4868	4313	4508.7	160	155	182	127	169	211	145	199	145	164	165.7
682	4513	4501	4556	4407	4549	4552	4455	4494	4885	4320	4523.2	160	156	186	127	169	211	145	200	145	165	166.4
683	4531	4515	4571	4421	4564	4564	4465	4506	4908	4328	4537.3	160	157	187	128	169	211	145	200	145	166	166.8
684	4541	4526	4592	4436	4583	4581	4485	4523	4925	4340	4553.2	163	157	189	128	170	212	146	201	145	168	167.9
685	4567	4542	4607	4453	4608	4600	4502	4542	4944	4358	4572.3	162	158	189	128	169	211	149	204	145	170	168.5
686	4588	4569	4619	4464	4618	4612	4526	4561	4956	4374	4588.7	163	159	189	131	169	211	149	206	146	170	169.3
687	4611	4586	4645	4481	4633	4630	4536	4579	4971	4389	4606.1	162	159	189	132	170	212	150	207	145	170	169.6
688	4623	4601	4663	4502	4648	4645	4562	4595	4987	4401	4622.7	163	159	192	132	170	211	151	207	146	171	170.2
689	4638	4622	4676	4528	4672	4658	4576	4625	5001	4422	4641.8	164	160	194	132	169	211	151	207	146	173	170.7
690	4656	4642	4694	4545	4690	4672	4586	4646	5022	4444	4659.7	164	160	195	132	169	211	152	208	147	174	171.2
691	4677	4657	4712	4558	4706	4689	4603	4663	5039	4454	4675.8	166	161	195	133	169	214	153	208	147	174	172
692	4696	4676	4729	4578	4728	4711	4617	4677	5055	4474	4694.1	167	161	198	134	171	215	153	210	146	174	172.9
693	4710	4691	4754	4593	4753	4730	4637	4698	5078	4488	4713.2	168	162	198	137	173	215	153	210	146	175	173.7
694	4728	4703	4767	4604	4771	4746	4656	4717	5089	4506	4728.7	168	162	198	137	173	217	152	211	146	176	174
695	4742	4726	4789	4623	4786	4766	4677	4731	5110	4517	4746.7	168	163	198	139	172	218	152	211	147	178	174.6
696	4761	4741	4816	4639	4803	4784	4705	4744	5127	4532	4765.2	169	163	198	139	173	218	154	212	149	178	175.3
697	4787	4766	4836	4653	4819	4798	4725	4762	5150	4552	4784.8	171	162	198	139	173	218	154	212	152	180	175.9
698	4809	4788	4851	4671	4840	4814	4744	4781	5173	4575	4804.6	174	163	199	139	173	219	155	212	151	180	176.5
699	4819	4798	4866	4685	4855	4828	4768	4801	5186	4591	4819.7	174	163	199	139	173	219	156	214	151	181	176.9
700	4840	4821	4880	4696	4876	4847	4791	4816	5210	4610	4838.7	175	165	199	139	174	220	158	214	151	182	177.7
701	4865	4840	4897	4720	4897	4871	4814	4830	5231	4630	4859.5	177	165	200	140	174	221	158	215	153	183	178.6
702	4884	4868	4909	4733	4912	4891	4835	4851	5251	4658	4879.2	178	165	200	143	174	221	158	217	155	183	179.4
703	4901	4885	4917	4757	4938	4916	4849	4864	5265	4680	4897.2	178	165	202	143	174	224	160	219	157	183	180.5
704	4915	4902	4942	4774	4955	4936	4872	4889	5283	4694	4916.2	179	165	202	144	175	225	160	219	156	185	181
705	4931	4917	4962	4787	4973	4954	4892	4897	5308	4706	4932.7	180	165	203	144	177	226	160	219	156	185	181.5
706	4948	4938	4983	4802	4995	4966	4912	4918	5331	4725	4951.8	181	167	203	144	179	226	159	219	157	187	182.2
707	4966	4947	5007	4815	5009	4987	4931	4935	5351	4742	4969	182	167	205	144	179	226	159	219	157	189	182.7
708	4984	4958	5030	4840	5029	5006	4950	4957	5378	4765	4989.7	183	167	205	145	180	227	160	219	157	190	183.3
709	5002	4980	5046	4862	5054	5030	4977	4980	5394	4777	5010.2	184	166	205	146	181	227	160	220	158	193	184
710	5022	4994	5066	4881	5073	5041	4995	4993	5417	4802	5028.4	184	166	203	146	181	227	160	219	160	194	184
711	5040	5015	5074	4893	5094	5064	5014	5016	5447	4809	5046.6	184	166	203	146	182	229	160	219	161	195	184.5
712	5058	5032	5087	4907	5111	5080	5035	5039	5465	4827	5064.1	185	167	203	146	182	231	161	221	162	195	185.3
713	5076	5052	5100	4926	5134	5093	5052	5055	5483	4842	5081.3	185	167	205	146	183	232	161	221	162	195	185.7
714	5095	5067	5118	4944	5156	5114	5076	5076	5499	4869	5101.4	185	167	205	146	183	232	162	222	162	196	186
715	5109	5092	5130	4965	5177	5132	5097	5093	5519	4888	5120.2	185	168	204	146	183	232	163	223	162	196	186.2
716	5127	5111	5139	4992	5195	5153	5120	5109	5537	4900	5138.3	188	169	204	146	183	232	164	224	162	196	186.8
717	5140	5135	5156	5011	5210	5172	5144	5130	5560	4923	5158.1	189	172	204	147	185	233	165	224	162	196	187.7
718	5162	5148	5175	5034	5230	5190	5160	5149	5577	4935	5176	189	172	204	147	185	234	166	224	162	196	187.9
719	5184	5169	5200	5062	5255	5212	5187	5170	5600	4953	5199.2	189	173	204	147	186	236	166	224	163	196	188.4
720	5208	5180	5219	5091	5270	5232	5206	5186	5620	4975	5218.7	190	173	204	147	186	236	166	224	163	196	188.5
721	5230	5195	5235	5118	5297	5254	5223	5203	5646	4989	5239	190	173	205	147	186	236	166	226	163	196	188.8
722	5244	5205	5247	5129	5318	5285	5242	5224	5661	5009	5256.4	190	173	207	147	186	238	168	227	164	196	189.6
723	5260	5225	5262	5139	5342	5298	5262	5245	5692	5026	5275.1	191	174	207	146	187	241	168	229	166	196	190.5
724	5277	5239	5282	5161	5363	5317	5288	5265	5706	5042	5294	191	174	207	147	188	242	168	230	167	197	191.1
725	5295	5258	5301	5178	5390	5338	5305	5289	5737	5064	5315.5	190	175	209	147	188	241	168	230	167	197	191.2
726	5306	5284	5312	5200	5412	5356	5319	5298	5760	5081	5332.8	191	175	209	147	189	241	168	231	167	198	191.6
727	5322	5308	5326	5214	5435	5377	5333	5308	5790	5096	5350.9	192	177	210	148	190	241	168	233	167	199	192.5
728	5339	5331	5346	5234	5463	5397	5348	5334	5809	5121	5372.2	192	177	210	148	190	244	167	234	168	199	192.9
729	5357	5343	5369	5252	5490	5421	5363	5360	5834	5138	5392.7	192	178	210	149	190	245	167	237	169	200	193.7
730	5374	5359	5390	5276	5508	5444	5387	5383	5848	5161	5413	192	178	212	150	190	246	167	239	170	200	194.4
731	5395	5380	5407	5296	5524	5464	5409	5396	5866	5181	5431.8	194	181	212	150	192	246	167	240	172	200	195.4
732	5404	5402	5424	5312	5539	5473	5424	5416	5885	5197	5447.6	194	181	212	150	192	248	168	239	173	201	195.8
733	5424	5421	5442	5335	5558	5489	5447	5438	5902	5214	5467	194	182	211	150	192	250	168	240	173	201	196.1
734	5449	5436	5467	5353	5581	5506	5462	5459	5916	5229	5485.8	196	183	211	152	193	250	170	240	174	201	197
735	5461	5467	5485	5369	5605	5524	5485	5478	5929	5249	5505.2	197	183	212	153	193	250	170	242	177	203	198
736	5484	5488	5503	5398	5617	5550	5510	5504	5951	5272	5527.7	199	184	211	153	193	251	173	242	177	205	198.8
737	5498	5506	5520	5428	5633	5576	5533	5523	5971	5295	5548.3	201	184	212	153	194	251	173	243	177	207	199.5
738	5524	5522	5538	5444	5651	5601	5552	5542	5989	5316	5567.9	202	184	212	155	198	253	173	244	177	208	200.6
739	5542	5539	5556	5457	5675	5613	5576	5557	6006	5337	5585.8	202	185	212	155	200	254	174	245	178	209	201.4
740	5556	5562	5566	5472	5697	5631	5594	5571	6032	5355	5603.6	202	186	212	155	201	256	176	244	177	208	201.7
741	5572	5586	5581	5501	5714	5654	5604	5596	6049	5372	5622.9	203	186	212	156	203	256	176	245	178	208	202.3
742	5586	5602	5595	5520	5734	5670	5629	5611	6067	5399	5641.3	203	186	212	155	203	257	177	246	178	209	202.6
743	5595	5623	5616	5543	5749	5688	5644	5626	6096	5418	5659.8	204	186	211	156	203	258	177	246	181	210	203.2
744	5612	5650	5645	5552	5774	5711	5652	5642	6113	5441	5679.2	204	186	212	157	204	259	177	246	181	210	203.6
745	5634	5674	5676	5576	5801	5723	5671	5661	6131	5463	5701	205	186	212	159	204	261	178	245	181	211	204.2
746	5659	5696	5697	5594	5827	5738	5697	5684	6161	5491	5724.4	204	186	214	159	204	265	180	247	181	212	205.2
747	5679	5719	5719	5617	5849	5766	5720	5709	6184	5503	5746.5	205	186	215	159	204	266	180	246	182	212	205.5
748	5699	5747	5743	5639	5870	5792	5741	5735	6211	5524	5770.1	205	189	215	161	204	268	180	249	183	212	206.6
749	5717	5773	5765	5665	5893	5810	5761	5755	6229	5544	5791.2	205	189	216	161	204	268	179	249	183	212	206.6
750	5733	5796	5786	5686	5912	5832	5784	5780	6249	5565	5812.3	206	191	216	161	205	270	180	249	183	213	207.4
751	5749	5818	5805	5710	5926	5857	5798	5800	6269	5577	5830.9	206	191	216	161	206	270	182	250	185	213	208
752	5764	5843	5831	5727	5948	5873	5820	5814	6297	5600	5851.7	206	192	216	162	206	270	183	251	187	213	208.6
753	5788	5864	5850	5752	5963	5896	5838	5840	6323	5621	5873.5	208	192	219	162	207	270	184	253	187	214	209.6
754	5808	5881	5869	5775	5979	5918	5857	5864	6345	5640	5893.6	208	192	219	165	208	270	184	253	187	216	210.2
755	5830	5903	5888	5798	6001	5945	5887	5879	6372	5666	5916.9	210	194	219	166	210	270	185	251	189	217	211.1
756	5853	5925	5904	5820	6016	5967	5908	5904	6394	5677	5936.8	212	194	219	166	210	271	184	251	191	217	211.5
757	5873	5943	5924	5841	6035	5986	5933	5924	6421	5699	5957.9	213	194	219	166	212	275	187	251	191	217	212.5
758	5897	5964	5937	5863	6056	6008	5961	5951	6447	5717	5980.1	214	195	219	165	215	275	186	251	191	217	212.8
759	5919	5994	5964	5886	6077	6030	5978	5975	6465	5746	6003.4	214	196	219	165	215	277	186	251	191	218	213.2
760	5949	6015	5979	5912	6094	6056	5993	6001	6481	5767	6024.7	215	198	220	164	215	278	187	251	191	219	213.8
761	5970	6038	5995	5936	6114	6081	6010	6016	6511	5791	6046.2	216	198	220	165	216	279	187	251	190	220	214.2
762	5987	6061	6012	5959	6126	6097	6033	6034	6535	5811	6065.5	216	198	220	165	217	281	188	253	192	220	215
763	6008	6081	6032	5983	6147	6116	6063	6047	6547	5829	6085.3	216	198	220	165	219	282	187	253	193	220	215.3
764	6030	6105	6049	6003	6178	6143	6082	6069	6584	5854	6109.7	216	198	222	165	219	283	188	255	193	222	216.1
765	6053	6120	6071	6024	6197	6162	6100	6091	6611	5875	6130.4	216	201	223	165	219	284	188	256	195	223	217
766	6069	6148	6100	6037	6217	6184	6127	6110	6631	5889	6151.2	218	202	223	165	220	285	188	258	195	224	217.8
767	6089	6172	6134	6062	6237	6218	6143	6133	6644	5909	6174.1	220	202	225	165	220	287	188	258	197	224	218.6
768	6110	6206	6153	6091	6267	6245	6162	6151	6667	5933	6198.5	220	202	225	165	222	288	188	259	197	224	219
769	6127	6230	6177	6104	6289	6267	6185	6175	6692	5958	6220.4	219	202	226	165	223	289	190	260	199	225	219.8
770	6144	6257	6194	6132	6317	6297	6212	6204	6713	5977	6244.7	219	202	226	165	223	291	190	261	201	225	220.3
771	6163	6284	6220	6156	6337	6315	6227	6227	6732	5995	6265.6	220	202	226	165	224	295	190	262	202	225	221.1
772	6191	6301	6233	6179	6363	6341	6245	6262	6765	6023	6290.3	221	202	226	166	224	296	190	263	205	227	222
773	6214	6328	6249	6203	6387	6365	6270	6279	6793	6039	6312.7	222	202	226	167	226	298	190	264	206	229	223
774	6235	6342	6273	6224	6411	6384	6283	6305	6816	6073	6334.6	222	202	227	168	227	300	190	266	208	230	224
775	6264	6369	6292	6244	6430	6409	6311	6338	6843	6094	6359.4	222	202	227	169	228	300	190	267	208	230	224.3
776	6286	6396	6312	6266	6459	6440	6330	6354	6871	6124	6383.8	222	204	227	169	228	300	191	268	208	231	224.8
777	6306	6422	6334	6286	6485	6467	6357	6373	6893	6146	6406.9	222	204	227	169	229	300	192	269	209	233	225.4
778	6339	6442	6361	6311	6505	6497	6377	6398	6913	6169	6431.2	223	202	230	169	229	300	193	271	209	233	225.9
779	6348	6466	6382	6332	6522	6524	6400	6428	6935	6191	6452.8	224	202	231	169	231	302	193	272	211	233	226.8
780	6380	6490	6415	6353	6545	6545	6416	6447	6963	6219	6477.3	224	202	231	172	232	303	193	272	211	233	227.3
781	6399	6510	6439	6375	6582	6567	6432	6478	6990	6239	6501.1	224	203	232	172	232	305	194	271	211	234	227.8
782	6429	6522	6474	6393	6604	6598	6458	6511	7016	6264	6526.9	224	204	232	174	232	305	194	273	212	235	228.5
783	6446	6552	6502	6411	6629	6629	6488	6532	7036	6283	6550.8	224	207	232	176	233	306	195	276	213	238	230
784	6464	6578	6537	6434	6642	6653	6513	6547	7067	6305	6574	225	207	232	176	234	306	194	276	213	239	230.2
785	6476	6593	6569	6451	6660	6687	6540	6571	7092	6326	6596.5	225	209	232	178	236	306	195	278	213	239	231.1
786	6501	6617	6583	6468	6689	6715	6564	6595	7122	6354	6620.8	225	210	232	179	236	308	195	279	212	242	231.8
787	6533	6641	6612	6492	6713	6746	6587	6615	7146	6371	6645.6	226	212	232	180	239	308	195	280	213	242	232.7
788	6548	6674	6639	6521	6741	6767	6603	6640	7174	6398	6670.5	226	213	231	181	240	309	195	281	214	242	233.2
789	6571	6702	6671	6540	6760	6785	6624	6667	7207	6420	6694.7	227	213	234	182	240	312	195	281	215	244	234.3
790	6591	6725	6702	6559	6778	6811	6643	6693	7222	6438	6716.2	227	213	234	183	240	314	195	283	216	245	235
791	6612	6752	6725	6579	6812	6833	6666	6710	7242	6468	6739.9	229	214	237	183	240	314	196	283	215	247	235.8
792	6636	6792	6747	6601	6838	6861	6684	6737	7277	6485	6765.8	229	214	237	184	240	314	197	283	215	248	236.1
793	6666	6816	6779	6631	6864	6889	6717	6761	7303	6511	6793.7	229	218	237	185	240	316	197	285	217	250	237.4
794	6689	6839	6805	6653	6886	6921	6744	6790	7333	6536	6819.6	229	218	237	187	240	317	199	286	219	250	238.2
795	6710	6862	6832	6685	6912	6946	6768	6814	7364	6568	6846.1	231	221	238	187	239	316	198	287	220	251	238.8
796	6738	6881	6857	6717	6939	6972	6793	6833	7391	6597	6871.8	232	222	238	187	239	319	198	287	220	253	239.5
797	6759	6899	6887	6751	6964	6997	6814	6860	7416	6617	6896.4	232	222	238	188	239	321	201	287	221	254	240.3
798	6796	6916	6912	6775	6992	7022	6831	6886	7444	6643	6921.7	232	222	241	188	239	323	202	287	221	255	241
799	6822	6944	6931	6810	7016	7046	6855	6918	7469	6669	6948	232	223	242	188	241	323	204	290	221	255	241.9
800	6848	6963	6956	6839	7047	7077	6878	6936	7500	6691	6973.5	233	223	243	188	241	323	204	292	221	257	242.5
801	6878	6995	6979	6864	7073	7101	6902	6963	7529	6719	7000.3	234	224	241	188	242	325	205	295	221	259	243.4
802	6904	7024	7009	6887	7097	7131	6919	7004	7551	6739	7026.5	236	224	241	188	242	324	206	295	220	259	243.5
803	6938	7040	7039	6907	7130	7153	6952	7026	7574	6759	7051.8	237	225	241	190	244	326	206	297	220	259	244.5
804	6963	7065	7055	6927	7164	7184	6968	7055	7594	6784	7075.9	238	227	241	190	245	329	207	298	219	259	245.3
805	6991	7093	7086	6949	7190	7209	6996	7087	7618	6804	7102.3	238	227	241	190	247	330	208	299	220	260	246
806	7030	7119	7117	6983	7217	7232	7021	7113	7641	6829	7130.2	238	227	240	191	249	335	208	299	221	260	246.8
807	7065	7143	7152	7018	7233	7263	7044	7131	7665	6850	7156.4	238	227	240	192	250	335	211	299	220	260	247.2
808	7097	7161	7180	7047	7266	7301	7060	7160	7695	6874	7184.1	238	227	241	193	250	335	211	299	220	260	247.4
809	7118	7187	7218	7076	7290	7327	7076	7178	7732	6888	7209	238	229	241	194	251	337	212	300	221	261	248.4
810	7144	7206	7255	7111	7315	7363	7105	7208	7771	6912	7239	239	228	242	197	254	339	212	300	223	261	249.5
811	7164	7232	7291	7132	7339	7383	7138	7231	7797	6938	7264.5	240	228	241	198	254	343	212	303	223	263	250.5
812	7200	7263	7321	7157	7363	7410	7158	7253	7829	6964	7291.8	241	230	242	198	256	344	212	304	224	264	251.5
813	7220	7283	7349	7186	7392	7438	7189	7279	7858	6982	7317.6	243	231	243	201	258	345	213	306	225	266	253.1
814	7246	7316	7380	7216	7415	7461	7215	7317	7892	7014	7347.2	242	231	245	202	259	345	213	307	225	266	253.5
815	7286	7339	7408	7250	7453	7488	7239	7345	7917	7042	7376.7	244	230	246	205	260	346	213	308	226	266	254.4
816	7312	7374	7438	7276	7470	7514	7271	7374	7948	7066	7404.3	245	231	248	205	260	348	215	309	226	266	255.3
817	7349	7396	7463	7296	7493	7541	7294	7397	7987	7097	7431.3	246	232	250	206	262	348	216	309	228	267	256.4
818	7377	7431	7487	7320	7513	7561	7326	7429	8020	7126	7459	248	233	251	207	262	348	219	310	229	268	257.5
819	7400	7461	7515	7350	7551	7587	7352	7454	8048	7158	7487.6	247	234	254	208	262	349	219	310	229	269	258.1
820	7419	7480	7557	7378	7576	7610	7371	7477	8077	7176	7512.1	250	238	255	208	264	350	221	311	231	269	259.7
821	7442	7512	7577	7402	7608	7636	7393	7504	8113	7198	7538.5	249	237	255	211	267	352	222	313	231	269	260.6
822	7474	7538	7606	7432	7634	7667	7433	7539	8149	7213	7568.5	250	238	256	211	268	353	221	314	232	268	261.1
823	7499	7571	7630	7450	7664	7706	7457	7567	8178	7244	7596.6	253	240	256	211	270	352	222	315	234	268	262.1
824	7536	7595	7652	7474	7692	7739	7477	7595	8204	7279	7624.3	253	240	257	211	271	353	222	316	234	268	262.5
825	7570	7639	7667	7498	7723	7770	7504	7626	8233	7305	7653.5	252	241	258	211	273	352	223	316	234	269	262.9
826	7605	7662	7699	7531	7749	7792	7533	7649	8278	7328	7682.6	253	242	260	212	275	353	224	317	234	270	264
827	7631	7688	7722	7564	7785	7811	7563	7681	8311	7360	7711.6	254	242	262	212	275	355	224	318	234	269	264.5
828	7665	7717	7743	7588	7810	7847	7589	7708	8341	7401	7740.9	254	243	264	213	275	355	226	318	234	270	265.2
829	7688	7741	7772	7615	7845	7877	7629	7725	8381	7428	7770.1	254	243	265	213	275	356	228	318	237	273	266.2
830	7715	7776	7809	7645	7881	7908	7649	7746	8405	7454	7798.8	256	244	266	213	276	356	229	318	237	274	266.9
831	7739	7795	7843	7680	7910	7930	7676	7781	8441	7486	7828.1	256	244	267	213	276	355	229	320	237	275	267.2
832	7768	7819	7871	7715	7951	7959	7694	7795	8469	7512	7855.3	259	245	268	214	277	356	230	323	237	276	268.5
833	7797	7841	7911	7735	7978	7996	7733	7828	8498	7532	7884.9	262	245	268	215	279	356	230	324	238	277	269.4
834	7820	7876	7937	7760	8006	8022	7766	7859	8524	7552	7912.2	264	245	271	216	280	356	230	324	238	278	270.2
835	7848	7914	7970	7789	8037	8049	7796	7896	8550	7591	7944	266	246	273	216	280	356	231	325	239	280	271.2
836	7872	7944	8003	7816	8069	8089	7819	7926	8584	7618	7974	266	247	280	217	280	357	231	326	240	281	272.5
837	7911	7978	8031	7844	8091	8118	7847	7967	8614	7641	8004.2	268	247	280	217	281	357	231	327	240	281	272.9
838	7942	8007	8071	7867	8110	8146	7881	8002	8660	7663	8034.9	270	248	284	220	281	359	232	328	240	285	274.7
839	7981	8036	8097	7890	8151	8176	7920	8036	8687	7685	8065.9	271	250	289	222	284	359	233	328	244	285	276.5
840	8011	8072	8128	7910	8178	8203	7955	8069	8737	7714	8097.7	273	252	294	223	286	359	233	329	245	290	278.4
841	8050	8098	8157	7942	8221	8231	7992	8095	8763	7742	8129.1	273	252	295	224	286	361	235	328	244	293	279.1
842	8082	8136	8197	7967	8240	8256	8022	8127	8797	7777	8160.1	274	253	296	225	289	361	236	329	245	293	280.1
843	8113	8162	8232	8004	8272	8286	8054	8156	8830	7801	8191	276	254	300	227	289	363	237	329	250	296	282.1
844	8145	8189	8259	8031	8300	8313	8089	8184	8870	7835	8221.5	276	255	302	227	289	363	239	333	250	296	283
845	8177	8219	8288	8055	8318	8343	8128	8216	8897	7870	8251.1	278	260	304	227	289	363	239	334	251	296	284.1
846	8213	8240	8316	8086	8352	8376	8158	8250	8922	7901	8281.4	280	260	305	226	291	366	240	334	252	297	285.1
847	8247	8266	8344	8112	8382	8414	8192	8274	8955	7932	8311.8	284	263	307	227	293	368	240	335	253	297	286.7
848	8276	8300	8374	8141	8415	8452	8223	8303	8982	7961	8342.7	284	263	307	227	299	371	241	336	252	297	287.7
849	8310	8323	8406	8165	8446	8476	8258	8332	9027	7981	8372.4	286	264	310	227	300	372	242	337	252	297	288.7
850	8343	8346	8430	8195	8474	8513	8297	8367	9059	8010	8403.4	287	263	315	229	302	371	242	338	253	297	289.7
851	8373	8377	8454	8224	8506	8537	8320	8387	9091	8042	8431.1	288	264	316	228	304	372	243	337	253	297	290.2
852	8396	8405	8490	8258	8539	8568	8356	8421	9127	8066	8462.6	290	264	318	228	305	374	244	339	252	297	291.1
853	8429	8441	8534	8288	8574	8604	8403	8446	9173	8099	8499.1	293	264	318	228	306	378	245	339	252	297	292
854	8466	8473	8570	8324	8621	8635	8439	8482	9198	8132	8534	293	266	318	227	307	380	245	338	253	302	292.9
855	8502	8518	8607	8358	8655	8683	8462	8508	9239	8162	8569.4	294	268	319	227	306	380	246	340	255	302	293.7
856	8526	8550	8634	8394	8693	8713	8487	8543	9271	8192	8600.3	295	268	319	226	307	379	246	341	258	302	294.1
857	8542	8580	8665	8434	8721	8745	8510	8572	9302	8216	8628.7	295	269	319	226	309	380	246	341	259	303	294.7
858	8577	8617	8699	8461	8751	8770	8546	8600	9327	8245	8659.3	294	271	322	227	310	381	247	342	260	304	295.8
859	8607	8638	8738	8482	8781	8791	8571	8621	9368	8276	8687.3	295	272	325	228	311	383	248	344	260	307	297.3
860	8640	8658	8762	8511	8819	8829	8600	8648	9407	8317	8719.1	296	274	327	229	312	386	250	347	260	307	298.8
861	8672	8694	8799	8543	8858	8861	8641	8682	9438	8349	8753.7	298	276	331	228	312	387	252	348	260	308	300
862	8713	8721	8829	8566	8891	8886	8671	8712	9468	8392	8784.9	301	277	334	231	312	389	255	350	260	309	301.8
863	8756	8754	8855	8594	8913	8917	8691	8736	9495	8422	8813.3	301	278	336	231	311	389	255	351	262	310	302.4
864	8791	8791	8899	8624	8947	8948	8716	8767	9524	8453	8846	304	280	338	232	313	390	257	351	262	314	304.1
865	8834	8833	8926	8660	8985	8972	8753	8796	9558	8483	8880	304	280	338	233	313	390	258	352	262	314	304.4
866	8858	8866	8950	8703	9031	9012	8782	8831	9595	8514	8914.2	304	282	339	234	313	390	258	352	266	314	305.2
867	8904	8899	8987	8732	9063	9044	8821	8875	9632	8548	8950.5	305	283	340	234	315	391	258	354	266	315	306.1
868	8949	8939	9024	8774	9096	9076	8852	8910	9663	8581	8986.4	306	285	341	234	317	391	258	357	266	316	307.1
869	8982	8974	9060	8800	9126	9110	8880	8950	9716	8616	9021.4	307	285	343	237	318	394	258	359	265	318	308.4
870	9011	8998	9101	8838	9155	9160	8910	8985	9767	8649	9057.4	310	286	346	237	319	395	259	360	266	317	309.5
871	9049	9032	9131	8870	9180	9187	8939	9017	9803	8675	9088.3	310	286	347	238	321	396	259	361	266	317	310.1
872	9071	9062	9166	8901	9224	9217	8974	9057	9833	8716	9122.1	312	289	348	238	322	397	260	361	265	318	311
873	9120	9103	9195	8943	9265	9246	9010	9088	9873	8752	9159.5	313	289	349	239	322	397	263	362	267	322	312.3
874	9160	9141	9226	8974	9304	9282	9047	9130	9902	8784	9195	314	290	349	240	325	397	263	362	268	327	313.5
875	9186	9178	9267	9003	9346	9316	9081	9176	9946	8812	9231.1	315	291	355	240	325	399	267	364	268	329	315.3
876	9225	9210	9306	9031	9382	9351	9113	9206	9982	8844	9265	316	297	354	242	326	399	268	364	268	329	316.3
877	9265	9245	9351	9055	9419	9394	9149	9241	10021	8880	9302	315	297	353	243	326	399	270	366	267	331	316.7
878	9285	9275	9388	9080	9451	9422	9192	9268	10043	8913	9331.7	317	298	354	243	325	401	273	366	270	333	318
879	9321	9315	9420	9120	9486	9458	9235	9298	10088	8948	9368.9	324	299	352	243	326	402	274	368	273	333	319.4
880	9347	9348	9453	9167	9512	9490	9279	9326	10130	8984	9403.6	325	299	352	243	326	405	275	371	273	334	320.3
881	9369	9378	9489	9203	9550	9525	9313	9371	10175	9023	9439.6	328	300	351	246	325	405	277	373	274	336	321.5
882	9411	9417	9524	9239	9591	9559	9356	9402	10221	9061	9478.1	329	302	352	246	326	407	280	374	275	335	322.6
883	9433	9455	9558	9266	9634	9590	9402	9443	10259	9099	9513.9	331	301	354	248	327	407	281	378	276	335	323.8
884	9460	9485	9586	9302	9680	9627	9439	9479	10291	9139	9548.8	331	301	353	249	327	407	281	380	277	336	324.2
885	9498	9507	9625	9324	9725	9661	9482	9500	10333	9171	9582.6	330	301	355	249	327	410	283	380	277	336	324.8
886	9528	9554	9665	9355	9749	9696	9520	9536	10355	9200	9615.8	331	300	356	250	328	410	283	382	278	336	325.4
887	9565	9588	9697	9390	9777	9719	9551	9563	10387	9229	9646.6	333	303	357	250	328	415	283	383	280	336	326.8
888	9594	9624	9734	9436	9813	9757	9592	9598	10439	9266	9685.3	334	303	356	250	328	415	284	383	280	337	327
889	9632	9661	9761	9463	9848	9798	9631	9630	10478	9310	9721.2	335	304	357	252	329	415	283	383	280	337	327.5
890	9672	9701	9796	9495	9890	9826	9666	9661	10514	9345	9756.6	336	305	360	252	329	417	284	384	280	338	328.5
891	9715	9735	9831	9533	9932	9873	9707	9698	10557	9376	9795.7	335	305	361	253	330	417	284	385	281	340	329.1
892	9743	9781	9855	9587	9971	9913	9741	9733	10603	9411	9833.8	336	306	362	254	332	418	286	384	281	342	330.1
893	9782	9811	9887	9618	10013	9958	9773	9766	10645	9442	9869.5	337	306	362	255	335	418	289	386	283	342	331.3
894	9830	9837	9925	9657	10045	10007	9819	9801	10694	9479	9909.4	338	307	363	256	335	418	289	387	283	342	331.8
895	9864	9888	9947	9686	10084	10037	9856	9844	10737	9517	9946	338	310	365	257	337	421	290	387	283	343	333.1
896	9895	9925	9999	9728	10113	10069	9879	9883	10775	9552	9981.8	339	311	368	259	337	422	289	389	282	343	333.9
897	9921	9962	10023	9768	10155	10101	9914	9912	10810	9590	10015.6	340	311	368	258	338	428	289	391	283	343	334.9
898	9961	9991	10069	9802	10205	10147	9947	9968	10852	9629	10057.1	341	311	369	261	339	430	290	392	283	343	335.9
899	9998	10027	10108	9852	10247	10182	9987	10004	10898	9677	10098	342	311	370	263	340	429	291	394	283	346	336.9
900	10043	10073	10145	9896	10283	10220	10030	10044	10941	9700	10137.5	342	313	371	263	343	431	291	396	284	347	338.1
901	10082	10114	10182	9924	10327	10261	10070	10083	10983	9741	10176.7	344	315	374	264	344	434	291	398	287	351	340.2
902	10113	10162	10212	9964	10355	10298	10106	10119	11019	9773	10212.1	346	315	375	264	345	434	294	400	288	351	341.2
903	10143	10203	10235	10002	10403	10336	10152	10158	11068	9805	10250.5	348	315	376	264	345	435	295	400	288	352	341.8
904	10178	10233	10270	10045	10442	10374	10185	10201	11118	9833	10287.9	348	315	376	264	346	437	295	404	289	354	342.8
905	10218	10275	10307	10082	10480	10410	10221	10236	11145	9868	10324.2	349	317	378	266	346	438	295	405	290	356	344
906	10254	10312	10356	10109	10504	10446	10261	10282	11184	9906	10361.4	349	319	378	266	347	439	295	404	291	356	344.4
907	10285	10357	10389	10153	10549	10504	10310	10319	11223	9945	10403.4	350	320	378	267	347	440	297	408	295	359	346.1
908	10317	10389	10428	10202	10591	10543	10351	10366	11264	9986	10443.7	351	321	377	268	348	442	298	412	297	359	347.3
909	10378	10424	10462	10245	10638	10584	10385	10415	11307	10027	10486.5	352	321	378	270	350	444	299	415	299	361	348.9
910	10412	10475	10496	10274	10690	10620	10418	10452	11341	10065	10524.3	352	320	381	271	350	446	299	416	301	362	349.8
911	10450	10515	10533	10321	10723	10680	10452	10500	11389	10114	10567.7	353	323	381	271	352	447	300	416	303	364	351
912	10476	10552	10574	10352	10757	10723	10494	10535	11417	10153	10603.3	354	324	383	270	353	447	299	416	305	367	351.8
913	10499	10592	10614	10396	10782	10748	10519	10580	11456	10193	10637.9	355	328	382	273	354	448	302	417	305	369	353.3
914	10544	10638	10651	10431	10824	10781	10576	10634	11497	10232	10680.8	357	330	382	274	355	448	303	421	305	369	354.4
915	10574	10672	10699	10469	10863	10816	10621	10686	11546	10269	10721.5	359	333	383	274	357	448	307	421	306	368	355.6
916	10616	10707	10731	10519	10904	10862	10658	10715	11584	10308	10760.4	359	334	382	274	359	447	307	421	308	369	356
917	10647	10750	10776	10559	10936	10908	10693	10762	11626	10345	10800.2	360	337	384	273	362	448	307	422	309	369	357.1
918	10684	10792	10810	10597	10988	10947	10734	10798	11673	10380	10840.3	359	338	386	273	363	448	310	423	310	371	358.1
919	10720	10833	10848	10636	11037	10995	10782	10839	11712	10415	10881.7	362	338	388	274	363	449	310	422	312	371	358.9
920	10751	10875	10887	10683	11074	11045	10812	10888	11768	10447	10923	363	340	387	273	363	449	310	422	314	371	359.2
921	10795	10913	10918	10725	11119	11083	10856	10929	11829	10470	10963.7	365	341	385	272	363	449	310	424	317	372	359.8
922	10839	10960	10958	10759	11159	11122	10899	10967	11868	10505	11003.6	366	341	386	272	363	451	312	425	319	374	360.9
923	10886	11016	10998	10808	11196	11161	10933	10999	11909	10544	11045	368	341	386	272	363	455	313	426	323	374	362.1
924	10928	11054	11036	10836	11241	11201	10969	11043	11950	10578	11083.6	368	344	387	273	364	456	313	427	327	376	363.5
925	10967	11087	11076	10882	11281	11246	11006	11087	11982	10610	11122.4	373	344	389	273	364	456	314	427	331	377	364.8
926	11004	11122	11110	10936	11324	11293	11040	11115	12032	10647	11162.3	376	347	388	274	365	460	314	428	333	380	366.5
927	11056	11172	11151	10973	11357	11321	11088	11149	12075	10683	11202.5	376	347	391	276	365	461	316	429	332	382	367.5
928	11100	11221	11197	11012	11393	11356	11133	11185	12118	10724	11243.9	377	348	393	276	365	464	316	431	334	383	368.7
929	11137	11266	11235	11054	11427	11401	11175	11233	12164	10755	11284.7	378	347	394	277	365	464	317	433	337	385	369.7
930	11180	11306	11270	11092	11462	11446	11216	11277	12211	10799	11325.9	380	347	395	277	365	466	318	434	341	386	370.9
931	11212	11333	11305	11142	11502	11487	11265	11314	12268	10842	11367	381	347	396	277	366	468	318	437	341	387	371.8
932	11247	11374	11362	11191	11557	11530	11301	11347	12314	10888	11411.1	381	350	397	277	370	471	318	439	343	388	373.4
933	11285	11418	11411	11244	11596	11584	11355	11379	12358	10926	11455.6	382	351	397	280	372	475	322	441	345	388	375.3
934	11322	11461	11453	11287	11630	11633	11384	11424	12395	10965	11495.4	382	351	397	280	372	475	326	441	345	390	375.9
935	11353	11506	11507	11321	11665	11669	11425	11475	12445	11006	11537.2	383	351	398	279	374	476	327	445	345	389	376.7
936	11396	11540	11539	11369	11711	11701	11458	11524	12497	11065	11580	384	350	398	279	376	480	331	447	345	391	378.1
937	11442	11604	11580	11420	11753	11741	11508	11584	12538	11105	11627.5	385	353	399	280	376	483	331	449	347	393	379.6
938	11483	11649	11620	11455	11799	11787	11561	11626	12584	11150	11671.4	385	354	400	282	379	488	333	451	347	395	381.4
939	11526	11701	11653	11496	11844	11840	11598	11666	12632	11184	11714	387	354	401	281	380	488	334	454	351	395	382.5
940	11562	11742	11700	11541	11890	11886	11641	11706	12675	11231	11757.4	387	354	402	281	380	488	335	457	352	397	383.3
941	11601	11775	11748	11583	11937	11927	11685	11756	12730	11263	11800.5	387	355	404	281	380	490	334	458	353	400	384.2
942	11657	11826	11794	11626	11984	11965	11722	11810	12783	11306	11847.3	388	355	405	281	382	490	335	460	355	400	385.1
943	11719	11876	11839	11671	12020	12009	11773	11845	12840	11351	11894.3	388	357	409	282	384	494	334	462	355	401	386.6
944	11767	11909	11882	11720	12057	12053	11810	11894	12901	11399	11939.2	391	359	410	282	384	494	334	463	355	404	387.6
945	11811	11956	11911	11758	12113	12103	11852	11954	12943	11436	11983.7	392	365	410	285	384	495	336	464	359	404	389.4
946	11857	12012	11966	11822	12148	12149	11896	11997	12989	11486	12032.2	392	366	410	288	385	497	338	465	359	406	390.6
947	11888	12044	12009	11863	12198	12197	11944	12048	13056	11513	12076	392	366	412	288	387	500	338	466	360	406	391.5
948	11932	12086	12055	11905	12248	12233	11981	12090	13098	11560	12118.8	397	366	415	289	385	503	339	466	362	407	392.9
949	11977	12117	12100	11952	12300	12295	12022	12127	13144	11610	12164.4	399	366	417	290	385	503	339	466	364	411	394
950	12024	12166	12153	11994	12339	12338	12071	12174	13198	11650	12210.7	399	367	417	290	385	502	340	468	365	413	394.6
951	12069	12208	12203	12040	12388	12371	12118	12221	13254	11695	12256.7	401	367	417	290	388	506	341	470	366	421	396.7
952	12107	12264	12250	12086	12446	12408	12163	12262	13304	11740	12303	402	367	419	292	388	506	342	472	368	422	397.8
953	12158	12314	12289	12117	12494	12460	12215	12306	13360	11778	12349.1	404	367	419	295	388	509	345	473	370	427	399.7
954	12202	12361	12345	12162	12535	12514	12260	12346	13402	11835	12396.2	405	369	417	295	391	513	345	476	370	430	401.1
955	12255	12402	12392	12203	12577	12566	12301	12393	13458	11868	12441.5	405	370	416	296	392	514	348	476	370	431	401.8
956	12303	12454	12438	12245	12620	12611	12347	12440	13503	11906	12486.7	408	371	416	296	394	516	349	481	373	434	403.8
957	12350	12508	12488	12301	12673	12665	12400	12491	13564	11963	12540.3	411	370	416	295	395	519	349	482	373	435	404.5
958	12394	12547	12552	12358	12710	12727	12446	12531	13610	12002	12587.7	411	371	416	297	399	525	351	484	375	438	406.7
959	12443	12586	12609	12408	12755	12781	12500	12578	13658	12054	12637.2	412	371	416	297	399	529	351	483	375	442	407.5
960	12493	12642	12648	12446	12805	12834	12532	12629	13719	12104	12685.2	413	371	418	297	401	533	352	483	378	441	408.7
961	12546	12709	12695	12482	12846	12899	12587	12680	13765	12165	12737.4	413	374	417	300	404	533	352	484	380	442	409.9
962	12589	12752	12733	12527	12890	12966	12637	12720	13836	12211	12786.1	412	374	417	301	405	537	353	489	380	445	411.3
963	12641	12798	12783	12582	12933	13021	12686	12775	13886	12253	12835.8	414	374	418	301	406	538	353	490	380	447	412.1
964	12698	12848	12824	12625	12977	13072	12728	12820	13933	12309	12883.4	415	373	420	301	406	541	356	492	380	448	413.2
965	12739	12897	12872	12672	13048	13116	12777	12862	13980	12347	12931	417	373	423	301	406	543	356	492	382	450	414.3
966	12780	12949	12932	12717	13092	13166	12817	12917	14034	12399	12980.3	418	375	424	303	407	547	356	493	384	453	416
967	12829	12994	12979	12760	13153	13232	12862	12969	14092	12439	13030.9	420	376	424	305	407	549	357	493	384	452	416.7
968	12873	13040	13027	12810	13197	13292	12917	13028	14138	12479	13080.1	421	376	424	305	407	549	357	493	385	452	416.9
969	12917	13083	13078	12847	13252	13349	12960	13076	14199	12530	13129.1	423	379	427	306	408	553	359	495	385	455	419
970	12973	13124	13139	12889	13298	13390	13014	13110	14253	12585	13177.5	424	381	427	305	411	559	361	497	387	456	420.8
971	13020	13180	13198	12936	13348	13440	13068	13157	14304	12634	13228.5	424	383	430	307	415	562	361	501	389	456	422.8
972	13073	13224	13257	12988	13397	13488	13107	13213	14355	12684	13278.6	425	383	431	309	414	562	361	504	389	459	423.7
973	13121	13276	13318	13030	13465	13541	13168	13269	14408	12729	13332.5	427	383	433	308	416	567	362	505	392	464	425.7
974	13167	13322	13368	13079	13518	13584	13218	13322	14460	12784	13382.2	428	384	433	309	418	574	363	507	394	466	427.6
975	13230	13373	13402	13123	13559	13640	13280	13381	14520	12821	13432.9	429	385	435	311	420	573	363	508	396	467	428.7
976	13291	13416	13449	13179	13606	13703	13335	13438	14571	12866	13485.4	429	386	436	311	420	573	363	511	397	468	429.4
977	13328	13465	13497	13246	13660	13765	13382	13491	14633	12916	13538.3	430	386	439	312	421	579	366	512	397	471	431.3
978	13384	13516	13571	13301	13707	13818	13440	13538	14681	12975	13593.1	432	385	440	313	423	581	368	513	400	472	432.7
979	13434	13569	13621	13354	13760	13870	13489	13599	14733	13023	13645.2	432	386	440	314	427	582	368	514	402	473	433.8
980	13484	13630	13660	13413	13807	13920	13525	13652	14785	13075	13695.1	436	387	440	315	430	586	368	518	403	475	435.8
981	13528	13666	13714	13471	13853	13969	13567	13707	14823	13122	13742	440	389	442	318	434	587	372	519	405	475	438.1
982	13577	13713	13769	13523	13904	14021	13622	13758	14882	13176	13794.5	444	390	442	318	436	591	375	519	408	479	440.2
983	13635	13770	13825	13572	13958	14086	13675	13801	14936	13226	13848.4	446	391	445	319	438	592	375	521	408	482	441.7
984	13678	13803	13889	13622	14016	14144	13707	13864	14986	13268	13897.7	446	391	446	320	441	596	375	524	409	483	443.1
985	13727	13853	13948	13672	14068	14196	13763	13914	15039	13319	13949.9	447	393	450	325	445	597	375	524	406	486	444.8
986	13771	13913	14003	13733	14115	14246	13823	13969	15086	13374	14003.3	449	396	450	327	447	602	375	529	407	488	447
987	13834	13967	14065	13782	14175	14295	13870	14026	15143	13414	14057.1	448	397	450	327	448	606	376	532	407	490	448.1
988	13890	14006	14124	13835	14238	14347	13925	14073	15195	13463	14109.6	450	399	455	327	450	607	376	534	407	490	449.5
989	13941	14058	14181	13893	14299	14393	13972	14128	15261	13513	14163.9	450	400	456	330	451	610	377	534	408	489	450.5
990	14006	14111	14239	13939	14342	14451	14026	14183	15321	13571	14218.9	452	401	456	329	453	612	376	536	407	491	451.3
991	14065	14157	14291	13987	14411	14498	14077	14239	15386	13627	14273.8	454	401	456	331	455	613	378	535	407	495	452.5
992	14144	14214	14354	14053	14464	14553	14129	14300	15432	13678	14332.1	456	401	458	331	455	614	379	536	409	497	453.6
993	14195	14264	14413	14110	14511	14610	14193	14353	15490	13741	14388	456	403	462	332	455	615	379	538	412	498	455
994	14248	14302	14457	14168	14568	14687	14233	14396	15550	13790	14439.9	457	407	463	332	455	621	378	538	412	499	456.2
995	14285	14362	14524	14220	14624	14741	14297	14446	15600	13848	14494.7	457	410	466	334	455	623	379	538	412	499	457.3
996	14329	14414	14580	14281	14678	14791	14348	14493	15657	13896	14546.7	457	413	470	337	455	622	382	538	414	500	458.8
997	14374	14464	14631	14324	14730	14846	14397	14562	15730	13931	14598.9	457	414	472	339	457	623	385	538	416	502	460.3
998	14429	14521	14687	14376	14796	14918	14463	14615	15803	13992	14660	459	414	475	344	459	625	385	539	416	503	461.9
999	14484	14583	14742	14435	14849	14974	14507	14662	15862	14052	14715	461	415	476	347	461	628	385	543	416	506	463.8
1000	14513	14612	14776	14458	14877	15003	14532	14693	15894	14084	14744.2	462	416	478	348	463	628	387	544	416	505	464.7
1001	14541	14639	14802	14481	14902	15022	14551	14725	15923	14108	14769.4	461	416	482	348	465	627	388	544	418	504	465.3
1002	14569	14673	14837	14505	14925	15057	14570	14772	15953	14126	14798.7	462	417	483	349	466	627	391	545	418	504	466.2
1003	14609	14702	14861	14523	14962	15096	14602	14793	15994	14154	14829.6	461	417	484	350	468	628	390	544	419	505	466.6
1004	14635	14739	14889	14563	14995	15130	14626	14822	16028	14180	14860.7	463	417	486	350	470	628	392	547	420	505	467.8
1005	14671	14779	14934	14595	15025	15160	14650	14855	16053	14204	14892.6	465	417	488	351	471	631	392	549	420	506	469
1006	14696	14818	14968	14614	15049	15186	14688	14886	16088	14229	14922.2	465	416	489	353	471	631	392	550	420	509	469.6
1007	14735	14855	14995	14641	15090	15215	14721	14920	16126	14254	14955.2	467	418	489	354	472	635	392	551	423	512	471.3
1008	14775	14880	15036	14672	15129	15238	14755	14946	16175	14280	14988.6	468	418	490	353	475	638	391	551	424	516	472.4
1009	14811	14910	15064	14709	15158	15267	14790	14981	16214	14311	15021.5	468	417	491	353	475	639	391	551	424	516	472.5
1010	14849	14939	15090	14739	15187	15301	14824	15023	16261	14347	15056	467	420	492	356	476	639	391	551	423	517	473.2
1011	14879	14980	15125	14797	15229	15342	14850	15060	16319	14373	15095.4	469	422	493	356	477	643	391	553	426	518	474.8
1012	14924	15012	15163	14831	15275	15381	14895	15111	16355	14408	15135.5	471	423	493	358	477	643	392	554	427	518	475.6
1013	14959	15050	15205	14874	15310	15427	14928	15146	16392	14444	15173.5	470	424	493	359	477	646	393	558	428	520	476.8
1014	15004	15091	15249	14911	15348	15470	14968	15187	16444	14486	15215.8	471	425	495	360	479	647	393	560	430	521	478.1
1015	15053	15117	15300	14950	15383	15507	15012	15223	16481	14528	15255.4	471	426	497	361	479	650	393	561	431	521	479
1016	15090	15148	15348	14981	15424	15553	15051	15266	16530	14567	15295.8	471	426	500	362	482	654	395	562	433	522	480.7
1017	15118	15189	15388	15020	15472	15600	15090	15302	16572	14597	15334.8	474	426	501	366	484	656	396	562	434	523	482.2
1018	15149	15225	15425	15051	15508	15629	15141	15351	16615	14633	15372.7	475	429	502	367	486	656	396	563	434	524	483.2
1019	15192	15286	15470	15104	15555	15662	15181	15389	16657	14667	15416.3	478	430	505	367	491	659	396	565	436	526	485.3
1020	15238	15325	15519	15139	15591	15704	15232	15439	16715	14713	15461.5	482	435	505	367	492	658	396	566	436	527	486.4
1021	15287	15368	15569	15185	15627	15750	15265	15483	16757	14751	15504.2	482	436	508	368	494	662	396	568	437	529	488
1022	15321	15420	15597	15222	15678	15791	15300	15518	16805	14797	15544.9	484	436	513	370	496	662	396	570	439	530	489.6
1023	15371	15464	15647	15267	15720	15843	15349	15564	16857	14830	15591.2	484	435	514	371	496	665	396	572	438	532	490.3
1024	15418	15504	15696	15321	15764	15878	15395	15604	16911	14879	15637	486	435	518	374	497	667	396	574	440	534	492.1
1025	15456	15550	15742	15376	15810	15917	15437	15662	16944	14928	15682.2	487	438	518	377	500	669	396	576	440	534	493.5
1026	15514	15608	15786	15411	15857	15962	15473	15717	16999	14962	15728.9	491	439	518	379	501	673	398	578	442	537	495.6
1027	15556	15664	15832	15458	15909	16007	15519	15760	17044	15003	15775.2	491	439	521	379	503	671	399	580	443	538	496.4
1028	15611	15711	15886	15495	15966	16051	15566	15804	17102	15050	15824.2	495	438	524	380	506	671	402	579	444	538	497.7
1029	15662	15770	15924	15535	16014	16107	15618	15869	17157	15096	15875.2	494	440	525	383	507	673	403	580	445	541	499.1
1030	15712	15808	15969	15581	16064	16147	15663	15931	17213	15154	15924.2	496	443	525	383	507	674	405	582	448	543	500.6
1031	15777	15863	16013	15621	16121	16204	15716	15981	17275	15205	15977.6	496	445	529	384	506	678	407	583	449	543	502
1032	15821	15916	16071	15665	16164	16253	15773	16020	17331	15261	16027.5	498	447	533	386	506	678	408	585	450	544	503.5
1033	15864	15958	16112	15726	16208	16304	15817	16071	17385	15309	16075.4	502	449	535	388	506	681	411	587	451	545	505.5
1034	15909	16000	16156	15771	16264	16349	15867	16117	17443	15361	16123.7	504	449	539	387	505	682	411	585	453	547	506.2
1035	15955	16051	16206	15828	16325	16404	15918	16167	17494	15415	16176.3	505	451	540	389	506	682	413	585	456	549	507.6
1036	16021	16109	16273	15882	16384	16459	15970	16217	17545	15459	16231.9	506	455	539	389	508	687	418	588	456	550	509.6
1037	16066	16167	16325	15935	16440	16505	16011	16282	17608	15498	16283.7	509	457	540	391	509	692	419	590	456	550	511.3
1038	16112	16224	16376	15974	16487	16576	16073	16333	17662	15552	16336.9	510	462	543	393	510	694	420	592	457	553	513.4
1039	16150	16290	16427	16027	16548	16627	16130	16374	17701	15599	16387.3	512	462	545	394	512	696	421	594	457	555	514.8
1040	16193	16346	16479	16082	16609	16685	16186	16422	17754	15656	16441.2	513	463	551	393	515	698	422	595	457	555	516.2
1041	16245	16389	16527	16141	16665	16740	16235	16475	17824	15710	16495.1	516	466	551	394	516	697	425	599	458	559	518.1
1042	16292	16449	16573	16191	16720	16795	16292	16518	17890	15754	16547.4	518	469	553	393	516	700	428	598	459	561	519.5
1043	16338	16518	16622	16255	16775	16847	16334	16574	17939	15814	16601.6	521	471	554	394	515	700	431	600	461	561	520.8
1044	16374	16565	16691	16302	16837	16901	16386	16639	17983	15873	16655.1	521	474	556	394	518	701	432	600	462	561	521.9
1045	16439	16610	16752	16359	16886	16945	16436	16688	18041	15921	16707.7	525	474	559	396	519	701	432	602	462	564	523.4
1046	16487	16658	16799	16398	16951	17003	16491	16733	18096	15977	16759.3	526	475	560	397	523	702	434	605	463	565	525
1047	16543	16711	16846	16453	17000	17070	16535	16780	18154	16028	16812	527	477	563	399	526	704	436	606	463	566	526.7
1048	16597	16789	16901	16499	17058	17118	16599	16821	18209	16072	16866.3	530	478	563	399	527	704	438	606	464	567	527.6
1049	16658	16850	16959	16564	17113	17187	16656	16893	18266	16119	16926.5	530	480	567	400	528	705	439	608	466	569	529.2
1050	16705	16887	17022	16624	17174	17249	16700	16945	18324	16172	16980.2	533	481	569	400	532	712	440	614	466	570	531.7
1051	16764	16952	17081	16695	17236	17294	16755	17003	18377	16223	17038	536	484	571	404	535	718	441	616	465	572	534.2
1052	16802	17008	17122	16762	17287	17362	16797	17053	18424	16274	17089.1	538	484	574	405	537	720	443	616	468	576	536.1
1053	16868	17080	17179	16807	17333	17418	16860	17102	18482	16342	17147.1	540	485	575	407	541	723	445	619	468	577	538
1054	16924	17139	17236	16852	17388	17473	16921	17152	18547	16410	17204.2	546	484	577	409	543	723	449	621	470	578	540
1055	16982	17198	17286	16902	17439	17541	16981	17217	18611	16464	17262.1	547	486	578	410	547	729	451	624	471	579	542.2
1056	17034	17267	17321	16961	17505	17590	17049	17265	18668	16519	17317.9	548	488	582	413	549	730	458	627	474	581	545
1057	17074	17318	17374	17023	17556	17656	17104	17326	18737	16580	17374.8	550	492	585	413	552	731	461	630	480	583	547.7
1058	17132	17382	17437	17092	17610	17721	17173	17391	18806	16635	17437.9	551	493	588	415	554	733	464	632	481	584	549.5
1059	17193	17436	17498	17151	17653	17776	17220	17470	18866	16710	17497.3	553	494	593	416	554	732	466	634	481	585	550.8
1060	17236	17494	17554	17221	17714	17828	17276	17538	18922	16758	17554.1	555	497	594	417	557	736	470	637	483	587	553.3
1061	17287	17563	17614	17272	17794	17881	17339	17601	18982	16818	17615.1	554	499	595	418	558	739	473	640	484	587	554.7
1062	17352	17614	17666	17328	17857	17935	17394	17661	19057	16896	17676	554	500	595	421	561	739	473	643	487	588	556.1
1063	17414	17668	17726	17388	17924	17989	17437	17730	19119	16937	17733.2	556	505	598	424	563	740	476	646	490	590	558.8
1064	17473	17717	17799	17453	17977	18056	17495	17776	19194	16998	17793.8	561	508	597	427	563	742	477	648	490	592	560.5
1065	17522	17782	17866	17511	18046	18109	17552	17837	19266	17048	17853.9	563	509	599	428	563	746	477	649	493	596	562.3
1066	17578	17844	17938	17555	18111	18170	17624	17895	19334	17098	17914.7	562	509	600	428	565	746	476	651	495	601	563.3
1067	17638	17907	17989	17613	18183	18224	17678	17949	19414	17158	17975.3	565	514	601	431	566	748	479	655	498	606	566.3
1068	17694	17980	18048	17663	18257	18292	17746	18017	19485	17213	18039.5	565	515	603	432	571	750	479	658	501	609	568.3
1069	17752	18033	18118	17724	18340	18351	17821	18075	19572	17264	18105	568	516	606	433	572	750	480	661	502	611	569.9
1070	17811	18095	18182	17784	18408	18424	17877	18136	19630	17331	18167.8	572	518	609	436	572	751	481	665	502	611	571.7
1071	17877	18144	18235	17849	18458	18477	17937	18185	19684	17391	18223.7	573	520	612	436	573	755	482	668	505	612	573.6
1072	17934	18217	18306	17917	18506	18545	17988	18248	19772	17441	18287.4	575	518	613	439	575	757	482	669	508	613	574.9
1073	17986	18275	18363	17957	18582	18612	18045	18313	19842	17499	18347.4	577	522	613	440	579	759	482	670	509	617	576.8
1074	18045	18326	18438	18021	18650	18673	18112	18376	19929	17577	18414.7	580	521	616	441	581	761	484	670	511	618	578.3
1075	18102	18385	18504	18084	18705	18731	18178	18426	20004	17630	18474.9	581	523	618	442	581	763	487	675	513	621	580.4
1076	18166	18445	18563	18138	18764	18806	18241	18473	20077	17684	18535.7	584	528	623	444	582	770	489	676	516	624	583.6
1077	18224	18512	18629	18188	18830	18870	18297	18525	20141	17756	18597.2	585	531	625	445	584	770	489	678	516	625	584.8
1078	18272	18564	18681	18252	18902	18949	18363	18584	20210	17813	18659	587	533	626	446	588	770	494	680	518	626	586.8
1079	18348	18620	18752	18309	18965	19016	18418	18637	20296	17874	18723.5	591	531	627	448	591	772	496	685	521	628	589
1080	18410	18692	18806	18379	19033	19084	18479	18706	20353	17932	18787.4	591	534	632	450	594	775	499	686	524	633	591.8
1081	18477	18761	18865	18452	19105	19144	18555	18759	20419	18001	18853.8	594	535	634	451	596	776	500	692	524	632	593.4
1082	18550	18826	18925	18519	19161	19220	18632	18836	20485	18074	18922.8	600	536	638	454	601	779	502	696	525	636	596.7
1083	18613	18895	18988	18593	19230	19283	18697	18913	20576	18136	18992.4	603	538	640	454	605	785	505	699	526	637	599.2
1084	18683	18964	19053	18672	19301	19351	18756	18975	20663	18205	19062.3	603	539	640	456	606	788	506	701	527	639	600.5
1085	18755	19033	19116	18744	19377	19411	18821	19041	20732	18276	19130.6	605	545	642	456	608	791	507	704	528	643	602.9
1086	18822	19094	19176	18811	19459	19462	18880	19111	20815	18336	19196.6	606	550	645	456	609	792	508	706	530	646	604.8
1087	18883	19160	19247	18878	19521	19536	18956	19177	20888	18410	19265.6	610	553	644	458	607	794	507	710	531	649	606.3
1088	18959	19230	19331	18939	19583	19618	19025	19237	20961	18484	19336.7	611	553	644	459	609	796	510	712	533	649	607.6
1089	19041	19303	19406	19001	19649	19704	19084	19292	21039	18533	19405.2	611	555	648	460	611	799	516	717	539	650	610.6
1090	19107	19377	19480	19055	19720	19782	19152	19371	21100	18592	19473.6	614	555	649	462	614	801	516	719	540	652	612.2
1091	19174	19441	19547	19137	19796	19847	19224	19428	21179	18645	19541.8	614	559	652	463	614	802	518	721	540	653	613.6
1092	19260	19501	19606	19209	19872	19912	19299	19499	21247	18708	19611.3	618	563	655	467	616	802	521	722	540	655	615.9
1093	19327	19559	19684	19281	19939	19990	19374	19580	21320	18769	19682.3	619	565	656	468	618	804	522	722	541	657	617.2
1094	19415	19630	19750	19363	20006	20061	19462	19641	21399	18839	19756.6	621	565	657	468	621	804	524	726	545	658	618.9
1095	19476	19697	19826	19436	20067	20119	19534	19722	21474	18908	19825.9	625	564	658	468	623	807	524	726	546	659	620
1096	19560	19766	19886	19499	20127	20185	19615	19799	21553	18950	19894	625	564	661	469	628	809	525	727	550	660	621.8
1097	19623	19855	19954	19574	20209	20244	19671	19868	21619	19008	19962.5	630	567	663	471	629	812	527	730	553	663	624.5
1098	19702	19912	20021	19648	20269	20307	19747	19938	21695	19069	20030.8	632	567	663	473	630	814	530	733	554	663	625.9
1099	19763	19969	20062	19725	20356	20385	19817	20009	21767	19136	20098.9	634	568	664	476	636	816	533	735	558	665	628.5
1100	19831	20036	20120	19792	20430	20452	19867	20068	21836	19204	20163.6	637	569	664	477	637	817	535	739	558	665	629.8
1101	19895	20093	20181	19884	20496	20516	19933	20132	21916	19270	20231.6	640	571	668	479	643	820	538	742	558	667	632.6
1102	19968	20167	20269	19951	20576	20591	20007	20207	22006	19342	20308.4	645	573	671	479	647	821	538	747	559	672	635.2
1103	20029	20238	20337	20016	20660	20653	20062	20294	22089	19394	20377.2	649	577	674	481	648	823	539	757	562	675	638.5
1104	20118	20308	20423	20089	20727	20729	20121	20378	22177	19481	20455.1	651	580	678	483	653	824	541	759	565	678	641.2
1105	20200	20380	20485	20163	20802	20801	20190	20450	22269	19551	20529.1	649	581	678	484	654	828	547	761	565	679	642.6
1106	20273	20459	20566	20256	20882	20878	20252	20530	22336	19634	20606.6	650	584	678	487	653	830	552	767	566	683	645
1107	20348	20539	20637	20328	20956	20951	20323	20608	22414	19709	20681.3	650	584	680	490	657	831	554	768	568	685	646.7
1108	20423	20608	20710	20393	21030	21032	20421	20682	22506	19771	20757.6	650	585	681	492	659	837	555	774	571	691	649.5
1109	20474	20671	20788	20468	21096	21106	20504	20760	22596	19851	20831.4	652	587	681	492	660	839	556	777	575	695	651.4
1110	20537	20763	20852	20524	21167	21183	20573	20832	22664	19928	20902.3	653	589	684	495	666	840	560	779	576	698	654
1111	20605	20845	20929	20611	21233	21253	20657	20909	22747	19994	20978.3	656	594	684	496	668	841	560	779	579	703	656
1112	20677	20918	21010	20687	21320	21319	20741	20983	22829	20063	21054.7	659	594	686	497	670	845	562	778	579	705	657.5
1113	20762	20981	21088	20777	21380	21407	20803	21062	22904	20149	21131.3	663	597	686	498	671	846	566	783	580	709	659.9
1114	20833	21045	21169	20861	21449	21477	20883	21129	22968	20221	21203.5	664	597	686	499	674	850	568	785	586	713	662.2
1115	20900	21121	21232	20919	21529	21553	20951	21216	23042	20300	21276.3	668	598	688	502	678	850	571	788	589	714	664.6
1116	20988	21194	21330	20974	21595	21630	21037	21298	23125	20359	21353	669	600	691	502	682	854	575	790	590	719	667.2
1117	21061	21257	21406	21036	21671	21696	21120	21374	23200	20420	21424.1	672	601	692	504	686	855	575	791	590	720	668.6
1118	21126	21326	21472	21123	21742	21765	21190	21447	23292	20490	21497.3	675	603	692	504	690	862	576	795	593	722	671.2
1119	21204	21416	21546	21205	21820	21845	21272	21524	23367	20554	21575.3	674	605	697	502	690	865	577	800	593	725	672.8
1120	21281	21508	21631	21283	21886	21923	21348	21595	23440	20618	21651.3	679	605	703	503	689	867	579	803	593	727	674.8
1121	21355	21574	21691	21362	21968	22008	21432	21670	23530	20683	21727.3	682	604	702	505	690	869	581	804	595	729	676.1
1122	21440	21648	21784	21429	22042	22082	21494	21740	23600	20743	21800.2	682	605	704	506	691	870	582	808	597	730	677.5
1123	21512	21731	21861	21504	22120	22153	21580	21810	23672	20816	21875.9	682	608	706	507	692	870	584	812	599	732	679.2
1124	21598	21816	21923	21585	22197	22231	21659	21903	23754	20892	21955.8	684	608	707	509	697	872	586	815	600	734	681.2
1125	21692	21884	21999	21658	22271	22314	21737	21983	23834	20939	22031.1	687	609	708	510	701	874	587	816	607	737	683.6
1126	21772	21944	22078	21743	22352	22404	21813	22054	23927	21005	22109.2	689	612	711	512	705	878	590	816	609	742	686.4
1127	21830	22028	22155	21826	22431	22484	21890	22137	24003	21073	22185.7	688	614	716	514	707	882	591	815	611	742	688
1128	21914	22103	22248	21911	22520	22568	21965	22218	24059	21153	22265.9	687	617	718	520	707	885	592	818	616	743	690.3
1129	21984	22176	22300	22009	22595	22662	22045	22302	24162	21219	22345.4	689	618	720	521	709	886	595	817	618	745	691.8
1130	22061	22259	22385	22067	22670	22752	22116	22368	24245	21296	22421.9	689	619	725	521	712	887	597	820	620	747	693.7
1131	22119	22327	22455	22136	22757	22822	22189	22445	24336	21371	22495.7	693	620	727	521	715	892	595	824	621	750	695.8
1132	22199	22400	22542	22212	22824	22897	22256	22521	24425	21438	22571.4	693	623	728	521	717	894	597	826	624	754	697.7
1133	22274	22490	22624	22295	22910	22969	22336	22601	24538	21504	22654.1	697	623	725	521	717	895	598	828	628	757	698.9
1134	22360	22570	22702	22386	22988	23046	22417	22673	24633	21597	22737.2	698	625	727	522	720	899	599	830	631	759	701
1135	22430	22659	22776	22474	23060	23123	22499	22750	24731	21685	22818.7	702	627	734	523	720	900	599	831	635	763	703.4
1136	22497	22740	22848	22564	23142	23197	22588	22807	24811	21768	22896.2	705	631	735	526	722	901	599	835	637	769	706
1137	22588	22833	22933	22645	23204	23282	22687	22907	24902	21855	22983.6	707	633	737	528	728	910	603	836	639	769	709
1138	22667	22914	23007	22733	23298	23380	22768	22987	24996	21926	23067.6	706	633	739	528	732	912	603	836	640	769	709.8
1139	22751	22983	23089	22830	23366	23452	22858	23060	25092	22001	23148.2	709	635	742	529	732	918	602	838	643	771	711.9
1140	22828	23062	23178	22908	23444	23524	22920	23137	25184	22074	23225.9	715	637	742	530	732	923	602	842	645	775	714.3
1141	22916	23157	23261	22997	23528	23615	22999	23219	25262	22162	23311.6	718	639	743	536	734	931	603	847	647	781	717.9
1142	22995	23231	23359	23075	23613	23674	23088	23301	25352	22236	23392.4	720	643	744	538	737	939	605	850	647	785	720.8
1143	23054	23307	23427	23140	23691	23773	23183	23374	25429	22326	23470.4	722	645	745	539	741	941	605	851	649	790	722.8
1144	23136	23378	23520	23218	23783	23867	23260	23457	25496	22409	23552.4	724	645	747	540	748	944	605	855	650	792	725
1145	23202	23449	23603	23291	23875	23941	23346	23550	25584	22489	23633	724	645	750	543	749	945	606	859	654	792	726.7
1146	23281	23535	23678	23371	23967	24015	23427	23641	25678	22555	23714.8	729	645	751	544	750	950	609	863	655	795	729.1
1147	23364	23611	23752	23454	24052	24087	23505	23710	25744	22634	23791.3	731	647	756	545	752	955	612	866	656	799	731.9
1148	23452	23709	23835	23548	24133	24158	23582	23802	25832	22724	23877.5	732	649	757	547	752	955	617	868	655	801	733.3
1149	23544	23792	23918	23611	24216	24252	23669	23888	25937	22778	23960.5	731	653	758	549	751	962	617	872	658	809	736
1150	23618	23869	24002	23679	24295	24344	23744	23971	26015	22854	24039.1	736	654	760	550	757	965	620	872	661	810	738.5
1151	23695	23963	24069	23777	24395	24434	23817	24060	26102	22944	24125.6	738	655	765	552	761	971	621	877	663	813	741.6
1152	23780	24033	24157	23838	24470	24514	23899	24130	26206	22996	24202.3	741	655	769	554	761	973	620	880	665	816	743.4
1153	23870	24112	24238	23906	24557	24615	23974	24220	26308	23080	24288	742	656	770	555	762	977	618	884	667	817	744.8
1154	23944	24177	24321	23967	24651	24708	24052	24310	26391	23154	24367.5	742	660	773	556	765	978	623	887	668	816	746.8
1155	24022	24261	24390	24057	24730	24807	24121	24403	26496	23234	24452.1	743	662	777	559	767	979	626	889	672	820	749.4
1156	24116	24350	24465	24134	24816	24886	24219	24499	26596	23333	24541.4	743	665	778	561	770	980	628	891	671	820	750.7
1157	24201	24440	24542	24240	24910	24990	24306	24587	26672	23415	24630.3	744	667	782	565	775	985	630	891	676	823	753.8
1158	24293	24526	24625	24318	24969	25084	24394	24688	26754	23502	24715.3	747	668	783	566	775	988	632	892	679	826	755.6
1159	24384	24607	24706	24386	25050	25164	24470	24773	26843	23583	24796.6	748	670	787	566	781	991	632	894	682	829	758
1160	24463	24690	24796	24483	25129	25258	24534	24869	26922	23687	24883.1	749	675	787	570	783	995	634	896	683	833	760.5
1161	24550	24784	24881	24575	25200	25340	24637	24948	27009	23770	24969.4	749	678	787	573	784	995	634	899	688	835	762.2
1162	24629	24866	24970	24670	25276	25437	24709	25040	27104	23858	25055.9	750	681	789	575	785	997	638	899	690	837	764.1
1163	24707	24964	25051	24769	25360	25508	24789	25115	27181	23944	25138.8	754	685	790	577	785	997	639	907	692	839	766.5
1164	24796	25048	25137	24860	25447	25576	24864	25221	27269	24022	25224	756	689	794	579	787	999	643	912	697	841	769.7
1165	24890	25133	25236	24941	25518	25663	24958	25301	27363	24105	25310.8	755	692	798	585	788	1002	642	917	700	844	772.3
1166	24983	25222	25312	25029	25617	25757	25041	25387	27451	24175	25397.4	757	696	799	587	792	1006	642	922	703	843	774.7
1167	25065	25295	25401	25104	25692	25848	25133	25470	27549	24260	25481.7	760	700	802	588	795	1009	643	922	702	845	776.6
1168	25156	25383	25497	25203	25758	25938	25226	25543	27656	24357	25571.7	759	706	804	589	796	1011	646	924	702	851	778.8
1169	25228	25467	25586	25272	25851	26035	25309	25618	27752	24445	25656.3	763	707	806	592	799	1012	648	926	704	853	781
1170	25311	25547	25663	25364	25942	26127	25391	25696	27832	24523	25739.6	764	707	805	594	803	1017	648	929	708	854	782.9
1171	25382	25632	25755	25455	26016	26222	25467	25782	27907	24603	25822.1	765	708	809	596	806	1018	647	931	708	855	784.3
1172	25471	25730	25847	25535	26113	26325	25544	25865	27984	24693	25910.7	769	707	811	595	809	1019	648	933	713	861	786.5
1173	25557	25823	25940	25610	26201	26400	25632	25959	28076	24776	25997.4	769	706	813	597	810	1026	654	934	715	863	788.7
1174	25633	25908	26033	25687	26297	26493	25718	26056	28148	24862	26083.5	773	708	813	598	813	1031	660	939	716	865	791.6
1175	25715	26009	26130	25768	26384	26584	25789	26162	28221	24949	26171.1	775	708	815	597	813	1035	661	943	719	869	793.5
1176	25791	26094	26225	25850	26456	26675	25881	26243	28300	25040	26255.5	779	709	816	600	812	1038	665	945	724	871	795.9
1177	25871	26182	26318	25934	26571	26767	25971	26329	28392	25136	26347.1	782	710	820	603	814	1041	666	947	723	874	798
1178	25945	26244	26415	26013	26659	26850	26037	26424	28489	25218	26429.4	783	710	822	612	816	1043	667	950	725	874	800.2
1179	26034	26332	26485	26086	26746	26931	26121	26506	28579	25295	26511.5	785	711	825	615	817	1046	670	956	729	874	802.8
1180	26106	26421	26568	26168	26839	27026	26200	26590	28677	25388	26598.3	788	711	825	619	819	1050	671	961	731	877	805.2
1181	26164	26501	26654	26259	26933	27094	26273	26664	28784	25472	26679.8	789	716	826	618	821	1058	673	967	729	879	807.6
1182	26259	26587	26729	26360	27029	27191	26355	26740	28874	25552	26767.6	794	717	829	619	826	1062	676	971	730	882	810.6
1183	26346	26663	26815	26442	27126	27270	26434	26820	28972	25639	26852.7	797	721	830	621	828	1065	680	976	732	886	813.6
1184	26424	26752	26912	26531	27218	27360	26520	26918	29079	25714	26942.8	799	724	832	622	831	1068	681	979	736	889	816.1
1185	26494	26837	27011	26624	27309	27431	26602	27000	29171	25807	27028.6	802	730	834	623	832	1070	686	981	739	891	818.8
1186	26586	26916	27109	26691	27391	27515	26672	27082	29262	25872	27109.6	804	732	835	624	833	1074	689	984	742	893	821
1187	26672	27015	27185	26770	27467	27598	26747	27167	29359	25947	27192.7	808	730	838	626	834	1074	690	987	746	898	823.1
1188	26753	27116	27244	26841	27549	27671	26831	27250	29438	26045	27273.8	810	734	843	628	837	1074	692	990	744	900	825.2
1189	26829	27190	27319	26919	27627	27758	26911	27339	29525	26120	27353.7	809	737	852	628	839	1076	694	991	749	905	828
1190	26926	27275	27405	27017	27718	27849	26995	27431	29621	26198	27443.5	811	736	853	629	839	1081	695	993	752	910	829.9
1191	27008	27364	27500	27085	27807	27925	27076	27512	29720	26278	27527.5	815	738	854	630	845	1086	695	997	753	911	832.4
1192	27093	27468	27591	27176	27885	28002	27159	27609	29812	26366	27616.1	820	742	859	632	850	1091	698	1000	754	918	836.4
1193	27174	27541	27667	27262	27983	28087	27259	27701	29921	26438	27703.3	822	745	862	635	854	1095	701	1005	754	920	839.3
1194	27263	27643	27768	27335	28067	28176	27326	27780	30007	26522	27788.7	824	747	862	637	856	1099	702	1005	753	924	840.9
1195	27344	27719	27852	27411	28147	28257	27399	27875	30111	26599	27871.4	828	751	863	638	856	1099	703	1006	755	925	842.4
1196	27421	27802	27930	27501	28251	28352	27500	27961	30224	26679	27962.1	830	753	864	638	857	1103	704	1008	757	930	844.4
1197	27511	27889	28007	27603	28334	28437	27567	28058	30321	26763	28049	833	754	868	641	858	1106	705	1013	758	931	846.7
1198	27586	27974	28092	27673	28416	28524	27647	28130	30430	26843	28131.5	835	756	875	645	860	1115	704	1020	760	931	850.1
1199	27692	28060	28200	27750	28501	28629	27731	28202	30517	26920	28220.2	835	757	875	649	861	1119	709	1024	761	930	852
1200	27785	28140	28285	27838	28600	28718	27828	28278	30612	27005	28308.9	837	759	879	651	862	1126	711	1025	762	933	854.5
1201	27865	28227	28379	27912	28705	28807	27906	28377	30692	27091	28396.1	837	766	879	654	864	1129	715	1028	763	935	857
1202	27945	28309	28467	28007	28792	28898	27983	28482	30802	27186	28487.1	844	766	884	659	866	1133	715	1028	765	936	859.6
1203	28029	28387	28564	28096	28870	29006	28077	28572	30901	27267	28576.9	846	767	884	662	869	1136	715	1032	765	937	861.3
1204	28117	28498	28662	28189	28951	29101	28168	28658	30989	27362	28669.5	849	768	891	662	872	1142	717	1034	765	937	863.7
1205	28199	28588	28753	28283	29037	29186	28286	28747	31080	27455	28761.4	849	770	894	663	874	1145	717	1042	768	942	866.4
1206	28302	28688	28847	28382	29120	29283	28367	28857	31190	27546	28858.2	850	772	894	665	876	1151	716	1046	770	945	868.5
1207	28405	28789	28923	28454	29207	29380	28436	28938	31275	27626	28943.3	852	775	897	669	877	1155	718	1046	772	947	870.8
1208	28499	28883	29008	28552	29282	29463	28527	29021	31375	27704	29031.4	852	777	896	670	882	1157	720	1048	772	951	872.5
1209	28601	28974	29100	28646	29363	29549	28616	29096	31491	27816	29125.2	860	777	898	671	885	1165	723	1052	774	955	876
1210	28680	29062	29183	28748	29446	29622	28705	29184	31576	27893	29209.9	867	782	901	670	888	1167	726	1054	776	963	879.4
1211	28782	29165	29278	28839	29539	29694	28788	29285	31697	27987	29305.4	870	784	904	673	891	1174	726	1057	778	965	882.2
1212	28870	29269	29386	28924	29635	29796	28888	29405	31801	28082	29405.6	872	789	906	675	891	1181	725	1059	777	965	884
1213	28951	29344	29471	29005	29750	29880	28971	29498	31891	28163	29492.4	876	791	910	674	894	1183	728	1060	779	966	886.1
1214	29053	29434	29593	29088	29853	29980	29054	29584	31997	28253	29588.9	877	795	911	676	897	1188	731	1063	778	967	888.3
1215	29135	29522	29677	29172	29955	30066	29121	29672	32118	28342	29678	877	799	913	680	898	1187	734	1069	781	967	890.5
1216	29232	29604	29761	29261	30054	30178	29211	29750	32206	28440	29769.7	880	803	915	683	901	1189	736	1075	784	974	894
1217	29316	29709	29850	29350	30139	30288	29302	29856	32306	28512	29862.8	887	805	918	684	906	1194	737	1078	786	974	896.9
1218	29400	29795	29954	29441	30222	30371	29399	29950	32412	28584	29952.8	887	809	926	685	912	1193	742	1081	795	977	900.7
1219	29490	29890	30044	29539	30322	30453	29491	30029	32524	28674	30045.6	891	809	929	687	918	1200	743	1085	801	982	904.5
1220	29566	29977	30151	29640	30426	30554	29573	30121	32637	28761	30140.6	895	808	931	689	921	1207	747	1091	802	981	907.2
1221	29676	30075	30265	29746	30526	30637	29646	30221	32748	28849	30238.9	900	811	930	692	923	1211	749	1091	804	986	909.7
1222	29763	30173	30363	29832	30625	30733	29748	30318	32821	28942	30331.8	906	813	934	692	925	1212	751	1092	807	989	912.1
1223	29855	30265	30456	29931	30736	30814	29826	30415	32929	29046	30427.3	911	817	938	693	930	1213	752	1096	807	990	914.7
1224	29939	30353	30550	30013	30850	30920	29907	30502	33037	29127	30519.8	914	818	940	699	934	1214	754	1100	809	991	917.3
1225	30062	30468	30652	30126	30944	31003	30001	30604	33146	29219	30622.5	915	820	941	703	937	1218	755	1102	810	992	919.3
1226	30146	30573	30750	30217	31026	31106	30086	30688	33247	29309	30714.8	917	822	943	707	939	1222	757	1105	812	996	922
1227	30248	30662	30857	30320	31110	31215	30200	30790	33357	29401	30816	921	823	945	710	943	1229	758	1107	814	997	924.7
1228	30340	30764	30954	30411	31218	31300	30300	30895	33469	29497	30914.8	925	827	944	713	946	1228	760	1108	818	999	926.8
1229	30439	30871	31048	30519	31312	31402	30391	31007	33575	29603	31016.7	927	830	946	716	949	1233	762	1109	819	1002	929.3
1230	30540	30975	31135	30611	31416	31502	30493	31115	33672	29704	31116.3	930	834	954	718	952	1236	763	1116	822	1009	933.4
1231	30645	31104	31222	30693	31504	31606	30594	31201	33775	29795	31213.9	936	836	955	719	955	1237	767	1119	823	1011	935.8
1232	30725	31207	31312	30785	31606	31689	30714	31310	33873	29881	31310.2	938	841	957	723	956	1238	771	1120	828	1016	938.8
1233	30834	31330	31419	30892	31711	31793	30807	31412	33978	29980	31415.6	942	843	958	725	955	1244	773	1123	831	1023	941.7
1234	30933	31440	31528	31000	31813	31886	30926	31502	34087	30082	31519.7	945	844	962	729	957	1248	779	1123	834	1031	945.2
1235	31017	31533	31618	31091	31928	31998	31043	31601	34210	30180	31621.9	949	847	968	730	960	1247	779	1127	835	1035	947.7
1236	31099	31635	31712	31206	32023	32097	31143	31710	34323	30262	31721	955	854	973	734	962	1256	780	1127	839	1035	951.5
1237	31194	31746	31813	31303	32106	32199	31229	31807	34434	30380	31821.1	956	854	974	738	965	1253	781	1128	839	1039	952.7
1238	31288	31849	31904	31390	32224	32307	31322	31915	34571	30474	31924.4	959	854	978	743	966	1256	787	1130	840	1041	955.4
1239	31396	31951	31990	31489	32329	32429	31410	32007	34691	30563	32025.5	961	857	982	743	970	1260	789	1134	841	1045	958.2
1240	31504	32058	32109	31585	32458	32531	31509	32113	34803	30649	32131.9	967	859	987	745	973	1267	790	1136	840	1046	961
1241	31606	32161	32210	31683	32563	32636	31625	32207	34921	30740	32235.2	972	861	991	748	976	1272	792	1137	844	1048	964.1
1242	31710	32252	32307	31794	32667	32731	31726	32307	35043	30853	32339	973	864	997	754	980	1274	796	1143	846	1056	968.3
1243	31817	32368	32417	31898	32798	32859	31832	32410	35182	30943	32452.4	974	868	1000	754	984	1280	799	1146	850	1057	971.2
1244	31896	32477	32533	32012	32917	32972	31922	32512	35309	31027	32557.7	973	872	1002	755	988	1280	803	1149	853	1058	973.3
1245	32004	32588	32656	32133	33017	33076	32014	32626	35435	31141	32669	975	872	1007	759	1001	1282	808	1149	856	1060	976.9
1246	32097	32687	32766	32235	33132	33186	32135	32710	35551	31235	32773.4	978	876	1007	761	1006	1291	814	1153	857	1060	980.3
1247	32208	32800	32868	32328	33245	33316	32244	32816	35663	31320	32880.8	982	878	1011	766	1009	1296	815	1156	859	1060	983.2
1248	32304	32889	33000	32420	33356	33420	32365	32916	35771	31416	32985.7	984	882	1013	770	1014	1301	818	1159	861	1063	986.5
1249	32425	32995	33112	32525	33469	33534	32472	33028	35890	31519	33096.9	983	886	1017	773	1017	1304	820	1160	859	1066	988.5
1250	32551	33110	33226	32645	33588	33630	32568	33137	36001	31636	33209.2	984	889	1020	773	1020	1306	823	1166	861	1068	991
1251	32657	33209	33342	32744	33700	33737	32663	33257	36134	31748	33319.1	984	894	1025	775	1022	1309	825	1174	866	1072	994.6
1252	32761	33324	33461	32857	33831	33856	32749	33363	36267	31862	33433.1	988	899	1024	776	1023	1313	826	1178	865	1073	996.5
1253	32842	33439	33560	32975	33971	33964	32859	33463	36396	31969	33543.8	991	900	1027	779	1026	1314	832	1185	868	1072	999.4
1254	32944	33550	33654	33069	34085	34080	32965	33577	36510	32060	33649.4	992	903	1030	782	1030	1320	834	1189	871	1074	1002.5
1255	33051	33679	33769	33196	34196	34203	33084	33687	36633	32189	33768.7	994	907	1031	784	1031	1324	841	1190	872	1075	1004.9
1256	33176	33782	33866	33308	34310	34344	33204	33813	36752	32306	33886.1	997	913	1035	784	1032	1329	846	1193	878	1079	1008.6
1257	33300	33897	33990	33422	34430	34470	33320	33921	36889	32427	34006.6	999	915	1035	786	1035	1331	848	1201	881	1083	1011.4
1258	33413	34035	34125	33552	34553	34588	33438	34039	37035	32551	34132.9	1002	915	1040	789	1039	1333	855	1202	884	1085	1014.4
1259	33534	34153	34227	33683	34683	34697	33547	34166	37166	32675	34253.1	1004	920	1042	791	1041	1338	858	1202	885	1087	1016.8
1260	33634	34252	34342	33800	34796	34807	33685	34269	37286	32788	34365.9	1007	921	1043	793	1046	1341	864	1205	890	1089	1019.9
1261	33747	34360	34455	33916	34907	34933	33779	34392	37428	32891	34480.8	1012	924	1048	798	1047	1346	869	1209	889	1092	1023.4
1262	33876	34479	34585	34020	35029	35041	33890	34506	37579	33000	34600.5	1012	928	1052	798	1053	1352	868	1211	893	1094	1026.1
1263	33994	34583	34694	34136	35134	35160	34012	34648	37712	33104	34717.7	1014	931	1052	801	1059	1356	871	1218	897	1097	1029.6
1264	34089	34696	34824	34241	35243	35274	34130	34774	37854	33213	34833.8	1014	936	1059	805	1062	1357	872	1223	898	1102	1032.8
1265	34177	34795	34943	34358	35354	35383	34267	34885	37987	33326	34947.5	1020	937	1062	806	1062	1360	873	1224	902	1105	1035.1
1266	34300	34898	35078	34473	35483	35513	34380	35019	38107	33422	35067.3	1023	940	1065	809	1067	1363	878	1226	905	1108	1038.4
1267	34408	35032	35205	34594	35590	35629	34514	35127	38220	33540	35185.9	1032	942	1072	807	1069	1363	879	1228	908	1109	1040.9
1268	34544	35154	35318	34709	35698	35762	34636	35244	38351	33649	35306.5	1039	946	1081	809	1071	1370	888	1229	908	1112	1045.3
1269	34652	35271	35430	34827	35824	35885	34764	35375	38483	33768	35427.9	1046	949	1083	810	1075	1372	889	1234	910	1115	1048.3
1270	34794	35392	35547	34967	35938	36022	34892	35492	38608	33879	35553.1	1047	955	1084	812	1079	1377	892	1239	911	1116	1051.2
1271	34900	35509	35657	35110	36060	36157	35020	35631	38755	33969	35676.8	1050	958	1086	813	1086	1378	895	1239	913	1121	1053.9
1272	35013	35641	35778	35245	36199	36288	35154	35759	38886	34096	35805.9	1054	961	1089	815	1091	1379	898	1240	914	1125	1056.6
1273	35132	35765	35905	35383	36332	36438	35283	35875	39010	34234	35935.7	1061	961	1095	816	1095	1384	904	1244	914	1128	1060.2
1274	35265	35897	36044	35515	36451	36549	35408	36005	39128	34355	36061.7	1063	962	1096	816	1098	1390	904	1245	920	1133	1062.7
1275	35388	36049	36163	35650	36603	36692	35525	36134	39253	34477	36193.4	1066	968	1104	817	1101	1393	906	1248	922	1138	1066.3
1276	35513	36180	36304	35755	36736	36824	35639	36266	39396	34599	36321.2	1068	974	1108	818	1104	1399	909	1253	927	1143	1070.3
1277	35644	36307	36431	35883	36871	36926	35754	36393	39512	34718	36443.9	1075	979	1113	822	1109	1401	913	1256	928	1148	1074.4
1278	35767	36418	36563	36012	36995	37063	35875	36512	39631	34832	36566.8	1078	981	1114	827	1112	1405	918	1259	934	1149	1077.7
1279	35878	36536	36691	36156	37125	37182	36000	36647	39806	34947	36696.8	1078	986	1121	828	1113	1409	921	1263	939	1152	1081
1280	36023	36661	36804	36293	37251	37297	36117	36764	39952	35061	36822.3	1085	988	1126	833	1115	1412	921	1268	940	1155	1084.3
1281	36168	36794	36926	36425	37398	37424	36223	36891	40070	35190	36950.9	1090	989	1128	835	1118	1416	924	1273	945	1161	1087.9
1282	36319	36921	37067	36565	37536	37548	36352	37022	40216	35309	37085.5	1098	989	1133	839	1122	1417	928	1282	945	1164	1091.7
1283	36439	37051	37214	36710	37666	37668	36477	37164	40373	35449	37221.1	1101	991	1134	845	1125	1421	930	1287	948	1168	1095
1284	36574	37194	37330	36834	37814	37806	36616	37288	40514	35576	37354.6	1103	995	1135	846	1129	1426	936	1293	951	1170	1098.4
1285	36713	37334	37452	36952	37931	37957	36731	37402	40679	35702	37485.3	1107	999	1139	848	1133	1431	938	1296	953	1174	1101.8
1286	36860	37450	37600	37088	38074	38087	36865	37531	40813	35837	37620.5	1110	1003	1143	855	1134	1433	939	1304	957	1183	1106.1
1287	36970	37574	37727	37211	38202	38197	36999	37646	40955	35979	37746	1112	1002	1147	858	1136	1434	940	1310	958	1188	1108.5
1288	37100	37694	37845	37348	38327	38334	37123	37786	41091	36106	37875.4	1117	1006	1151	860	1139	1438	943	1316	963	1192	1112.5
1289	37236	37832	37969	37473	38467	38474	37261	37904	41259	36235	38011	1120	1006	1159	864	1143	1442	945	1319	971	1194	1116.3
1290	37370	37949	38105	37619	38586	38602	37421	38021	41406	36359	38143.8	1125	1007	1162	866	1149	1444	945	1323	973	1197	1119.1
1291	37522	38082	38237	37767	38712	38739	37567	38159	41543	36491	38281.9	1125	1010	1166	868	1152	1451	949	1327	981	1200	1122.9
1292	37638	38209	38372	37908	38842	38864	37709	38314	41669	36641	38416.6	1129	1010	1169	869	1151	1458	951	1333	984	1204	1125.8
1293	37760	38341	38504	38036	38987	39001	37850	38457	41819	36760	38551.5	1130	1013	1174	873	1154	1467	956	1336	987	1209	1129.9
1294	37912	38496	38647	38163	39153	39144	37970	38605	41977	36901	38696.8	1136	1013	1180	874	1154	1471	959	1340	990	1216	1133.3
1295	38046	38637	38778	38295	39290	39287	38113	38736	42117	37013	38831.2	1136	1016	1181	877	1155	1476	962	1344	992	1217	1135.6
1296	38173	38784	38895	38414	39421	39455	38246	38881	42249	37144	38966.2	1142	1023	1183	880	1155	1481	965	1346	992	1219	1138.6
1297	38307	38899	39023	38526	39560	39594	38386	39006	42391	37284	39097.6	1144	1025	1192	881	1160	1483	969	1349	995	1224	1142.2
1298	38441	39057	39163	38666	39689	39720	38524	39138	42565	37404	39236.7	1145	1030	1194	882	1166	1488	970	1357	999	1231	1146.2
1299	38577	39192	39321	38816	39809	39872	38655	39283	42731	37535	39379.1	1151	1035	1198	884	1167	1492	979	1360	1007	1235	1150.8
1300	38716	39322	39468	38938	39935	40016	38797	39414	42908	37684	39519.8	1152	1036	1198	890	1170	1499	983	1363	1008	1239	1153.8
1301	38868	39462	39588	39060	40114	40145	38944	39539	43051	37836	39660.7	1161	1039	1202	894	1172	1502	985	1373	1011	1242	1158.1
1302	39025	39605	39717	39170	40263	40285	39072	39684	43209	37978	39800.8	1164	1045	1207	896	1177	1507	988	1377	1011	1247	1161.9
1303	39200	39752	39852	39315	40410	40429	39200	39819	43383	38103	39946.3	1166	1046	1209	899	1182	1511	990	1381	1010	1250	1164.4
1304	39354	39892	39984	39459	40548	40588	39324	39930	43531	38225	40083.5	1171	1047	1214	905	1188	1517	993	1386	1012	1252	1168.5
1305	39514	40023	40134	39581	40671	40725	39464	40088	43685	38361	40224.6	1174	1049	1217	908	1192	1521	994	1388	1011	1261	1171.5
1306	39632	40153	40285	39706	40814	40867	39600	40262	43843	38501	40366.3	1176	1057	1218	912	1192	1524	996	1387	1016	1261	1173.9
1307	39758	40272	40405	39851	40970	41021	39757	40407	43985	38651	40507.7	1180	1058	1221	914	1195	1531	998	1392	1019	1268	1177.6
1308	39898	40388	40568	39993	41098	41141	39911	40568	44124	38794	40648.3	1182	1064	1229	918	1200	1533	1000	1399	1019	1271	1181.5
1309	40036	40530	40721	40148	41233	41293	40074	40697	44295	38938	40796.5	1183	1066	1229	924	1205	1536	1005	1409	1023	1275	1185.5
1310	40172	40682	40870	40298	41362	41443	40220	40850	44445	39071	40941.3	1184	1073	1230	925	1207	1541	1009	1414	1027	1274	1188.4
1311	40305	40835	41020	40459	41522	41575	40353	40974	44608	39217	41086.8	1190	1079	1235	928	1212	1547	1010	1416	1029	1281	1192.7
1312	40438	40975	41175	40597	41660	41722	40494	41151	44749	39349	41231	1195	1080	1233	931	1219	1548	1013	1423	1035	1286	1196.3
1313	40587	41132	41310	40759	41795	41868	40630	41282	44915	39497	41377.5	1203	1086	1239	931	1222	1555	1015	1426	1044	1290	1201.1
1314	40736	41280	41479	40916	41935	42007	40765	41421	45065	39625	41522.9	1206	1084	1242	935	1226	1556	1017	1435	1045	1294	1204
1315	40893	41414	41628	41078	42097	42147	40916	41569	45216	39763	41672.1	1211	1091	1244	934	1232	1561	1020	1441	1048	1300	1208.2
1316	41047	41573	41792	41237	42240	42290	41061	41716	45376	39911	41824.3	1217	1093	1248	934	1234	1571	1025	1443	1048	1305	1211.8
1317	41212	41705	41920	41383	42423	42437	41203	41864	45549	40038	41973.4	1222	1103	1252	936	1240	1581	1027	1448	1051	1311	1217.1
1318	41358	41877	42070	41534	42567	42590	41331	42021	45694	40167	42120.9	1225	1105	1256	935	1242	1582	1030	1451	1056	1312	1219.4
1319	41501	42041	42226	41681	42711	42742	41491	42173	45847	40314	42272.7	1227	1108	1261	939	1246	1588	1031	1459	1057	1321	1223.7
1320	41650	42190	42373	41838	42885	42892	41634	42318	45990	40456	42422.6	1231	1109	1265	943	1254	1591	1033	1463	1059	1326	1227.4
1321	41799	42362	42501	41987	43038	43047	41781	42474	46158	40595	42574.2	1233	1115	1268	948	1254	1598	1037	1474	1062	1329	1231.8
1322	41940	42514	42640	42129	43196	43204	41936	42616	46301	40739	42721.5	1237	1114	1272	953	1260	1600	1042	1477	1066	1333	1235.4
1323	42080	42659	42779	42274	43347	43358	42098	42766	46444	40860	42866.5	1244	1121	1276	959	1267	1601	1045	1485	1069	1335	1240.2
1324	42253	42788	42915	42415	43501	43527	42246	42913	46633	40998	43018.9	1247	1123	1282	964	1271	1604	1048	1488	1071	1339	1243.7
1325	42401	42943	43076	42563	43640	43689	42392	43057	46792	41156	43170.9	1247	1124	1287	966	1273	1610	1051	1494	1075	1344	1247.1
1326	42543	43082	43237	42698	43798	43835	42542	43208	46955	41310	43320.8	1252	1125	1293	970	1279	1614	1053	1497	1080	1345	1250.8
1327	42680	43232	43383	42845	43951	43979	42718	43349	47124	41457	43471.8	1255	1127	1299	974	1281	1617	1058	1505	1088	1345	1254.9
1328	42847	43374	43537	43000	44107	44128	42881	43504	47289	41601	43626.8	1257	1130	1303	976	1282	1623	1061	1511	1093	1348	1258.4
1329	42999	43503	43681	43155	44264	44294	43005	43675	47437	41737	43775	1263	1136	1303	980	1286	1625	1063	1518	1096	1355	1262.5
1330	43121	43661	43839	43297	44417	44450	43134	43806	47588	41883	43919.6	1265	1140	1311	980	1293	1631	1064	1520	1099	1360	1266.3
1331	43247	43824	43987	43436	44586	44609	43283	43960	47722	42026	44068	1266	1144	1318	984	1301	1633	1063	1526	1100	1362	1269.7
1332	43372	43986	44142	43562	44736	44782	43420	44107	47869	42174	44215	1266	1147	1323	987	1302	1637	1065	1529	1100	1365	1272.1
1333	43522	44144	44299	43688	44899	44923	43561	44250	48019	42301	44360.6	1269	1156	1330	990	1304	1639	1067	1529	1103	1375	1276.2
1334	43678	44285	44477	43844	45054	45087	43707	44385	48213	42470	44520	1271	1154	1335	995	1313	1642	1073	1538	1105	1378	1280.4
1335	43840	44431	44617	43998	45196	45233	43848	44571	48389	42618	44674.1	1274	1157	1340	997	1315	1643	1072	1540	1110	1381	1282.9
1336	44015	44612	44761	44127	45320	45359	43983	44727	48581	42763	44824.8	1277	1161	1345	999	1320	1651	1076	1548	1115	1382	1287.4
1337	44156	44761	44908	44291	45456	45510	44146	44886	48767	42894	44977.5	1280	1163	1346	1000	1326	1658	1080	1549	1118	1389	1290.9
1338	44310	44900	45071	44432	45603	45686	44294	45048	48936	43076	45135.6	1282	1164	1352	1000	1330	1664	1087	1554	1119	1393	1294.5
1339	44460	45078	45235	44586	45768	45835	44470	45214	49093	43236	45297.5	1284	1168	1352	1001	1334	1669	1088	1562	1121	1398	1297.7
1340	44614	45247	45381	44735	45897	45992	44628	45364	49256	43377	45449.1	1284	1170	1357	1005	1340	1674	1091	1565	1124	1401	1301.1
1341	44768	45404	45540	44879	46062	46154	44784	45507	49463	43525	45608.6	1287	1174	1359	1007	1344	1686	1091	1569	1128	1403	1304.8
1342	44908	45576	45692	45014	46223	46332	44942	45668	49650	43656	45766.1	1291	1177	1361	1009	1350	1687	1094	1571	1131	1407	1307.8
1343	45053	45730	45857	45165	46394	46499	45077	45840	49809	43822	45924.6	1301	1180	1366	1013	1355	1691	1094	1579	1138	1410	1312.7
1344	45198	45858	46010	45331	46549	46640	45221	46018	49948	43961	46073.4	1306	1183	1368	1016	1357	1697	1100	1584	1143	1413	1316.7
1345	45344	46026	46177	45500	46709	46793	45355	46177	50143	44098	46232.2	1309	1186	1376	1022	1360	1701	1103	1590	1150	1415	1321.2
1346	45484	46177	46314	45656	46891	46957	45513	46314	50337	44243	46388.6	1314	1187	1379	1025	1364	1706	1106	1593	1156	1423	1325.3
1347	45623	46326	46461	45813	47048	47126	45687	46476	50506	44364	46543	1321	1189	1382	1029	1371	1708	1109	1598	1156	1435	1329.8
1348	45778	46513	46626	45960	47191	47278	45845	46635	50665	44515	46700.6	1324	1192	1385	1034	1374	1712	1113	1605	1162	1443	1334.4
1349	45943	46678	46782	46121	47389	47425	46014	46773	50829	44668	46862.2	1327	1196	1385	1036	1380	1715	1117	1608	1167	1446	1337.7
1350	46091	46826	46928	46273	47550	47595	46152	46963	50993	44813	47018.4	1331	1202	1391	1041	1387	1718	1119	1615	1170	1453	1342.7
1351	46251	47001	47079	46401	47706	47782	46325	47128	51162	44977	47181.2	1344	1206	1392	1045	1391	1719	1118	1615	1173	1458	1346.1
1352	46407	47140	47250	46568	47858	47927	46479	47303	51331	45126	47338.9	1347	1209	1397	1050	1392	1729	1121	1623	1177	1463	1350.8
1353	46560	47306	47421	46708	48005	48106	46632	47487	51497	45280	47500.2	1351	1212	1398	1054	1396	1737	1123	1628	1185	1469	1355.3
1354	46706	47446	47576	46871	48154	48244	46785	47645	51656	45457	47654	1354	1215	1402	1057	1399	1744	1125	1631	1187	1477	1359.1
1355	46852	47607	47732	47070	48317	48410	46957	47818	51820	45591	47817.4	1353	1216	1405	1064	1400	1748	1129	1634	1195	1480	1362.4
1356	47001	47785	47884	47225	48499	48554	47121	47985	51995	45738	47978.7	1356	1220	1411	1063	1408	1757	1131	1641	1199	1483	1366.9
1357	47176	47953	48051	47390	48668	48750	47264	48139	52175	45884	48145	1358	1223	1416	1065	1413	1762	1132	1644	1202	1488	1370.3
1358	47315	48119	48241	47568	48807	48919	47416	48311	52349	46052	48309.7	1360	1227	1423	1066	1418	1768	1135	1649	1208	1492	1374.6
1359	47486	48284	48419	47723	48976	49087	47559	48464	52519	46204	48472.1	1364	1233	1428	1073	1423	1772	1135	1655	1210	1499	1379.2
1360	47612	48451	48588	47862	49108	49268	47703	48649	52717	46350	48630.8	1368	1238	1429	1075	1426	1773	1137	1659	1215	1503	1382.3
1361	47782	48600	48758	48047	49272	49427	47857	48826	52867	46504	48794	1370	1241	1433	1081	1427	1779	1141	1664	1216	1509	1386.1
1362	47941	48783	48915	48191	49448	49593	48015	48985	53048	46679	48959.8	1376	1242	1437	1084	1430	1780	1141	1668	1223	1512	1389.3
1363	48103	48927	49083	48371	49618	49756	48167	49140	53216	46840	49122.1	1381	1244	1448	1084	1432	1785	1146	1672	1227	1519	1393.8
1364	48237	49101	49255	48544	49788	49888	48340	49292	53382	46987	49281.4	1384	1246	1451	1087	1442	1790	1151	1673	1233	1522	1397.9
1365	48400	49258	49402	48711	49961	50054	48513	49455	53579	47135	49446.8	1388	1249	1453	1090	1451	1795	1152	1673	1233	1529	1401.3
1366	48552	49422	49558	48861	50131	50225	48684	49628	53763	47274	49609.8	1391	1258	1457	1093	1454	1801	1156	1679	1232	1536	1405.7
1367	48732	49596	49723	49007	50295	50395	48848	49782	53953	47426	49775.7	1399	1266	1461	1098	1457	1806	1158	1684	1241	1544	1411.4
1368	48895	49793	49894	49189	50466	50557	49018	49946	54123	47597	49947.8	1402	1268	1462	1101	1462	1806	1163	1693	1246	1550	1415.3
1369	49054	49965	50058	49325	50615	50735	49177	50101	54310	47778	50111.8	1407	1273	1463	1106	1461	1813	1166	1696	1252	1554	1419.1
1370	49206	50117	50198	49503	50772	50895	49351	50273	54497	47954	50276.6	1408	1277	1468	1111	1462	1820	1177	1702	1254	1558	1423.7
1371	49384	50287	50369	49681	50952	51069	49530	50459	54679	48089	50449.9	1414	1280	1477	1114	1466	1825	1184	1711	1262	1564	1429.7
1372	49535	50467	50564	49849	51122	51214	49699	50632	54852	48242	50617.6	1413	1284	1483	1118	1466	1832	1187	1719	1268	1571	1434.1
1373	49702	50620	50723	49998	51270	51390	49866	50786	55040	48383	50777.8	1419	1285	1489	1119	1472	1836	1194	1725	1271	1574	1438.4
1374	49854	50789	50901	50178	51429	51562	50036	50923	55219	48562	50945.3	1420	1288	1494	1120	1476	1849	1197	1728	1277	1577	1442.6
1375	50024	50970	51061	50336	51600	51725	50195	51094	55407	48743	51115.5	1428	1289	1496	1125	1480	1856	1199	1732	1277	1584	1446.6
1376	50190	51130	51248	50521	51782	51897	50332	51277	55584	48908	51286.9	1433	1290	1498	1128	1484	1863	1200	1734	1280	1586	1449.6
1377	50376	51297	51423	50688	51986	52064	50494	51441	55772	49075	51461.6	1438	1291	1500	1131	1487	1871	1202	1743	1285	1590	1453.8
1378	50537	51499	51571	50863	52197	52219	50657	51596	55952	49245	51633.6	1441	1292	1502	1133	1490	1873	1204	1747	1288	1596	1456.6
1379	50692	51662	51742	51040	52376	52385	50849	51767	56133	49413	51805.9	1445	1300	1506	1133	1492	1880	1206	1749	1292	1600	1460.3
1380	50865	51821	51895	51210	52557	52593	51022	51934	56310	49573	51978	1453	1302	1510	1136	1495	1891	1208	1758	1295	1606	1465.4
1381	51048	52008	52091	51387	52728	52775	51201	52110	56522	49722	52159.2	1456	1307	1512	1143	1498	1901	1212	1764	1301	1612	1470.6
1382	51225	52194	52266	51572	52900	52972	51370	52261	56709	49904	52337.3	1458	1311	1517	1146	1508	1904	1221	1771	1307	1618	1476.1
1383	51399	52360	52460	51746	53062	53146	51531	52454	56912	50079	52514.9	1463	1315	1522	1150	1513	1917	1223	1778	1311	1625	1481.7
1384	51547	52545	52623	51912	53225	53319	51717	52650	57118	50254	52691	1463	1321	1524	1153	1518	1922	1228	1786	1315	1629	1485.9
1385	51720	52727	52804	52071	53397	53498	51883	52821	57297	50408	52862.6	1468	1323	1528	1160	1524	1929	1229	1792	1320	1634	1490.7
1386	51897	52894	52966	52256	53594	53674	52051	53020	57510	50548	53041	1471	1329	1532	1161	1529	1936	1236	1806	1323	1643	1496.6
1387	52061	53059	53130	52428	53787	53837	52227	53206	57701	50726	53216.2	1475	1337	1538	1164	1531	1947	1239	1813	1329	1645	1501.8
1388	52236	53244	53324	52603	53966	54002	52406	53397	57918	50879	53397.5	1478	1340	1540	1167	1534	1954	1242	1819	1335	1653	1506.2
1389	52421	53425	53491	52761	54138	54204	52591	53564	58109	51055	53575.9	1484	1345	1541	1174	1535	1963	1247	1824	1336	1661	1511
1390	52584	53597	53693	52966	54316	54408	52753	53725	58303	51235	53758	1491	1351	1546	1182	1538	1976	1254	1823	1343	1668	1517.2
1391	52771	53787	53866	53157	54478	54615	52921	53909	58504	51410	53941.8	1497	1353	1547	1188	1541	1979	1257	1831	1349	1673	1521.5
1392	52943	53972	54063	53336	54657	54799	53114	54077	58696	51584	54124.1	1500	1359	1554	1190	1544	1984	1260	1836	1356	1675	1525.8
1393	53121	54150	54257	53516	54863	54960	53302	54252	58886	51750	54305.7	1504	1364	1559	1191	1544	1993	1269	1841	1363	1681	1530.9
1394	53314	54321	54441	53711	55065	55140	53487	54411	59092	51907	54488.9	1508	1370	1563	1195	1547	1999	1275	1846	1362	1692	1535.7
1395	53515	54506	54629	53897	55240	55281	53658	54603	59274	52063	54666.6	1510	1373	1568	1195	1552	2005	1277	1852	1363	1694	1538.9
1396	53686	54687	54819	54084	55406	55480	53822	54788	59489	52251	54851.2	1512	1380	1571	1195	1556	2014	1281	1853	1364	1697	1542.3
1397	53867	54893	55003	54255	55606	55669	54000	54979	59693	52423	55038.8	1516	1380	1577	1198	1559	2023	1286	1858	1363	1710	1547
1398	54028	55036	55166	54427	55818	55870	54167	55157	59900	52599	55216.8	1520	1384	1585	1199	1563	2030	1290	1860	1364	1714	1550.9
1399	54177	55205	55365	54607	56015	56051	54381	55339	60086	52755	55398.1	1524	1390	1591	1201	1565	2040	1293	1868	1369	1721	1556.2
1400	54344	55368	55545	54785	56227	56218	54524	55525	60289	52912	55573.7	1532	1392	1598	1204	1567	2051	1298	1876	1371	1727	1561.6
1401	54521	55549	55707	54978	56427	56401	54710	55732	60509	53084	55761.8	1540	1395	1604	1207	1567	2054	1300	1880	1373	1729	1564.9
1402	54729	55742	55893	55160	56611	56589	54892	55927	60685	53264	55949.2	1543	1400	1607	1211	1570	2069	1305	1883	1377	1738	1570.3
1403	54921	55916	56061	55344	56801	56766	55068	56126	60911	53448	56136.2	1549	1407	1609	1212	1574	2073	1309	1885	1377	1743	1573.8
1404	55104	56136	56254	55534	56997	56971	55257	56298	61131	53639	56332.1	1553	1414	1613	1216	1576	2081	1314	1891	1380	1753	1579.1
1405	55267	56318	56463	55761	57173	57150	55423	56482	61353	53782	56517.2	1558	1418	1612	1219	1586	2088	1318	1900	1381	1756	1583.6
1406	55444	56486	56649	55920	57342	57366	55610	56669	61591	53932	56700.9	1561	1420	1616	1221	1591	2089	1323	1903	1384	1760	1586.8
1407	55667	56688	56848	56115	57519	57563	55779	56831	61789	54114	56891.3	1567	1425	1619	1223	1596	2091	1323	1908	1387	1761	1590
1408	55820	56862	57042	56302	57700	57767	55968	57030	61947	54286	57072.4	1571	1428	1627	1226	1597	2097	1324	1912	1388	1768	1593.8
1409	56016	57046	57215	56466	57921	57947	56146	57237	62178	54510	57268.2	1579	1431	1628	1231	1599	2101	1332	1917	1390	1771	1597.9
1410	56220	57273	57402	56653	58094	58140	56325	57446	62365	54679	57459.7	1583	1435	1627	1238	1601	2106	1334	1924	1391	1776	1601.5
1411	56407	57475	57600	56835	58261	58364	56517	57657	62557	54867	57654	1588	1441	1630	1241	1608	2114	1337	1927	1392	1777	1605.5
1412	56579	57675	57790	56992	58442	58554	56695	57847	62756	55076	57840.6	1591	1444	1636	1247	1611	2124	1339	1929	1393	1779	1609.3
1413	56781	57840	57982	57174	58636	58754	56864	58036	62997	55286	58035	1598	1448	1638	1253	1612	2130	1341	1931	1396	1785	1613.2
1414	56979	58052	58168	57355	58823	58953	57050	58203	63229	55474	58228.6	1603	1459	1637	1253	1614	2133	1345	1935	1397	1789	1616.5
1415	57178	58233	58348	57546	59029	59159	57212	58412	63430	55644	58419.1	1609	1463	1642	1259	1620	2137	1343	1937	1398	1791	1619.9
1416	57383	58413	58538	57729	59206	59363	57407	58626	63654	55836	58615.5	1610	1473	1644	1262	1625	2143	1351	1940	1406	1794	1624.8
1417	57580	58624	58721	57957	59408	59571	57597	58809	63840	55987	58809.4	1616	1478	1647	1263	1633	2147	1357	1940	1413	1800	1629.4
1418	57777	58839	58943	58151	59606	59762	57784	59019	64027	56190	59009.8	1624	1481	1650	1269	1640	2155	1363	1942	1414	1808	1634.6
1419	57985	59028	59149	58364	59805	59975	57969	59238	64210	56373	59209.6	1632	1485	1653	1274	1643	2168	1371	1953	1418	1812	1640.9
1420	58150	59235	59351	58558	59978	60180	58177	59462	64423	56566	59408	1635	1489	1659	1278	1644	2175	1373	1956	1421	1817	1644.7
1421	58332	59438	59574	58760	60181	60375	58369	59664	64650	56759	59610.2	1640	1496	1665	1282	1656	2184	1375	1964	1426	1828	1651.6
1422	58504	59654	59795	58977	60392	60599	58541	59852	64878	56949	59814.1	1644	1497	1672	1286	1666	2188	1378	1968	1428	1833	1656
1423	58696	59861	59995	59165	60635	60801	58725	60050	65090	57127	60014.5	1649	1503	1677	1288	1670	2191	1383	1977	1435	1840	1661.3
1424	58887	60055	60221	59368	60827	61030	58919	60257	65317	57326	60220.7	1659	1508	1682	1291	1675	2196	1387	1980	1443	1840	1666.1
1425	59094	60244	60425	59564	61022	61251	59127	60441	65534	57505	60420.7	1665	1511	1690	1292	1683	2201	1395	1984	1447	1839	1670.7
1426	59288	60439	60625	59790	61222	61461	59327	60648	65762	57690	60625.2	1673	1518	1695	1299	1687	2210	1396	1985	1454	1845	1676.2
1427	59494	60634	60826	59965	61418	61668	59519	60839	65998	57889	60825	1685	1528	1696	1302	1693	2214	1397	1990	1455	1852	1681.2
1428	59687	60847	61010	60148	61614	61855	59716	61031	66219	58085	61021.2	1689	1531	1699	1307	1697	2218	1406	1993	1457	1861	1685.8
1429	59869	61038	61225	60345	61830	62076	59925	61245	66450	58300	61230.3	1698	1532	1710	1312	1700	2226	1408	1997	1461	1866	1691
1430	60104	61234	61432	60533	62038	62292	60160	61464	66701	58480	61443.8	1699	1537	1720	1313	1704	2229	1409	2002	1468	1871	1695.2
1431	60329	61450	61639	60716	62236	62474	60377	61688	66955	58678	61654.2	1704	1546	1727	1319	1708	2236	1411	2008	1473	1877	1700.9
1432	60530	61643	61837	60913	62460	62702	60611	61900	67180	58886	61866.2	1709	1550	1736	1320	1716	2242	1414	2015	1475	1886	1706.3
1433	60733	61838	62027	61104	62674	62913	60832	62111	67400	59081	62071.3	1717	1558	1744	1321	1716	2247	1420	2016	1476	1894	1710.9
1434	60935	62031	62192	61322	62891	63122	61035	62316	67637	59292	62277.3	1729	1564	1746	1326	1718	2251	1421	2021	1486	1897	1715.9
1435	61139	62286	62416	61507	63113	63328	61222	62516	67851	59498	62487.6	1731	1567	1749	1332	1718	2259	1423	2021	1490	1903	1719.3
1436	61331	62494	62608	61704	63334	63530	61416	62713	68093	59690	62691.3	1735	1571	1754	1335	1721	2262	1434	2025	1491	1912	1724
1437	61549	62695	62835	61889	63568	63749	61637	62942	68331	59894	62908.9	1740	1575	1765	1338	1728	2263	1440	2038	1500	1916	1730.3
1438	61735	62891	63039	62122	63763	63949	61876	63146	68572	60108	63120.1	1744	1578	1764	1340	1735	2276	1445	2046	1509	1921	1735.8
1439	61941	63123	63275	62349	64024	64148	62067	63375	68796	60298	63339.6	1749	1583	1767	1348	1739	2280	1449	2052	1515	1929	1741.1
1440	62140	63339	63509	62547	64237	64375	62226	63582	69042	60499	63549.6	1752	1586	1774	1351	1746	2281	1454	2059	1522	1930	1745.5
1441	62366	63571	63697	62748	64437	64572	62436	63801	69283	60668	63757.9	1757	1588	1779	1355	1749	2289	1461	2060	1526	1938	1750.2
1442	62594	63791	63894	62961	64653	64786	62660	64002	69503	60867	63971.1	1761	1593	1787	1357	1757	2292	1468	2067	1528	1942	1755.2
1443	62792	64002	64133	63174	64872	65007	62869	64199	69739	61083	64187	1765	1599	1794	1364	1763	2296	1470	2075	1532	1945	1760.3
1444	62995	64195	64374	63391	65102	65237	63075	64426	69994	61286	64407.5	1772	1601	1801	1369	1770	2301	1475	2081	1536	1951	1765.7
1445	63200	64398	64586	63578	65297	65446	63298	64646	70218	61475	64614.2	1781	1605	1803	1371	1777	2302	1482	2090	1542	1954	1770.7
1446	63427	64621	64805	63819	65509	65652	63511	64875	70481	61696	64839.6	1784	1611	1805	1377	1784	2307	1488	2095	1542	1962	1775.5
1447	63657	64838	65037	64025	65726	65869	63762	65108	70739	61913	65067.4	1785	1612	1812	1380	1788	2320	1496	2100	1544	1968	1780.5
1448	63894	65060	65241	64233	65939	66076	63981	65312	70966	62129	65283.1	1795	1619	1817	1382	1792	2327	1500	2107	1549	1972	1786
1449	64095	65276	65457	64456	66184	66321	64201	65524	71228	62320	65506.2	1799	1622	1823	1387	1800	2339	1501	2114	1556	1979	1792
1450	64299	65503	65687	64663	66407	66518	64419	65746	71470	62521	65723.3	1804	1630	1824	1391	1804	2340	1507	2122	1562	1983	1796.7
1451	64505	65723	65893	64865	66644	66748	64633	65968	71727	62736	65944.2	1809	1636	1832	1396	1812	2347	1509	2122	1567	1983	1801.3
1452	64724	65952	66106	65071	66892	66967	64878	66190	71940	62956	66167.6	1815	1638	1843	1402	1816	2350	1510	2129	1571	1987	1806.1
1453	64929	66158	66337	65308	67090	67188	65117	66426	72157	63187	66389.7	1820	1646	1848	1408	1820	2355	1519	2135	1575	1994	1812
1454	65141	66353	66556	65526	67293	67422	65335	66638	72404	63394	66606.2	1823	1654	1852	1412	1827	2361	1526	2138	1579	1999	1817.1
1455	65369	66565	66786	65721	67498	67641	65544	66869	72643	63606	66824.2	1828	1661	1859	1419	1833	2365	1531	2150	1583	2005	1823.4
1456	65596	66803	67023	65945	67733	67872	65754	67087	72900	63836	67054.9	1829	1667	1861	1425	1839	2369	1535	2155	1590	2012	1828.2
1457	65819	67019	67241	66179	67961	68102	65986	67323	73118	64070	67281.8	1833	1677	1864	1432	1846	2373	1545	2166	1597	2023	1835.6
1458	66036	67264	67450	66428	68182	68358	66227	67561	73369	64309	67518.4	1837	1681	1869	1435	1849	2373	1548	2174	1600	2029	1839.5
1459	66257	67505	67687	66658	68433	68595	66432	67802	73634	64515	67751.8	1838	1690	1871	1441	1858	2383	1554	2179	1605	2033	1845.2
1460	66489	67725	67918	66894	68663	68857	66642	68009	73883	64731	67981.1	1839	1691	1878	1449	1860	2394	1553	2189	1612	2040	1850.5
1461	66717	67951	68133	67100	68888	69092	66869	68238	74133	64971	68209.2	1849	1697	1880	1451	1865	2395	1557	2197	1618	2046	1855.5
1462	66957	68163	68382	67323	69163	69271	67117	68474	74385	65187	68442.2	1853	1706	1885	1457	1867	2397	1565	2203	1622	2051	1860.6
1463	67171	68383	68629	67567	69400	69507	67373	68722	74642	65419	68681.3	1858	1712	1896	1460	1878	2399	1568	2212	1629	2061	1867.3
1464	67408	68629	68864	67765	69668	69730	67601	68940	74866	65640	68911.1	1867	1717	1907	1466	1888	2408	1574	2217	1634	2062	1874
1465	67643	68867	69108	68002	69879	69977	67818	69183	75094	65869	69144	1878	1720	1913	1472	1896	2412	1578	2224	1639	2069	1880.1
1466	67873	69087	69308	68222	70113	70212	68057	69424	75333	66100	69372.9	1882	1722	1924	1480	1901	2418	1584	2230	1644	2077	1886.2
1467	68117	69318	69520	68464	70323	70442	68306	69652	75611	66349	69610.2	1896	1727	1928	1484	1908	2422	1588	2240	1652	2083	1892.8
1468	68338	69532	69757	68721	70552	70690	68525	69871	75860	66588	69843.4	1900	1729	1929	1489	1916	2437	1595	2247	1657	2085	1898.4
1469	68579	69785	70008	68949	70805	70977	68752	70095	76144	66804	70089.8	1910	1732	1936	1491	1923	2446	1596	2249	1661	2091	1903.5
1470	68846	70026	70250	69195	71074	71218	68969	70346	76422	67027	70337.3	1917	1731	1942	1495	1927	2455	1600	2259	1667	2097	1909
1471	69066	70286	70496	69451	71309	71449	69218	70580	76698	67262	70581.5	1921	1739	1947	1498	1928	2462	1603	2265	1671	2097	1913.1
1472	69297	70509	70742	69659	71524	71684	69453	70838	76960	67475	70814.1	1929	1743	1951	1498	1936	2468	1608	2275	1676	2105	1918.9
1473	69496	70781	70941	69881	71789	71934	69690	71064	77217	67715	71050.8	1935	1747	1958	1501	1944	2467	1614	2278	1679	2109	1923.2
1474	69716	71018	71191	70117	72035	72143	69935	71295	77472	67916	71283.8	1937	1755	1964	1502	1947	2478	1619	2283	1685	2111	1928.1
1475	69958	71271	71499	70358	72303	72380	70187	71547	77748	68178	71542.9	1937	1761	1969	1504	1948	2489	1623	2287	1691	2113	1932.2
1476	70215	71523	71717	70621	72536	72642	70423	71776	77995	68437	71788.5	1943	1765	1979	1507	1956	2494	1629	2296	1694	2125	1938.8
1477	70465	71744	71966	70896	72768	72865	70669	72016	78275	68664	72032.8	1946	1770	1984	1513	1969	2498	1629	2301	1700	2133	1944.3
1478	70718	71996	72203	71158	73060	73095	70889	72281	78542	68910	72285.2	1952	1773	1996	1517	1977	2503	1632	2316	1708	2137	1951.1
1479	70995	72242	72461	71394	73309	73359	71126	72533	78840	69153	72541.2	1963	1777	2003	1520	1989	2512	1643	2325	1713	2141	1958.6
1480	71235	72476	72715	71608	73574	73598	71344	72770	79107	69345	72777.2	1975	1783	2011	1522	1996	2518	1645	2333	1717	2145	1964.5
1481	71499	72722	72970	71847	73814	73854	71559	73004	79385	69603	73025.7	1986	1789	2023	1526	2004	2524	1652	2341	1723	2152	1972
1482	71784	72982	73222	72061	74057	74094	71810	73233	79678	69825	73274.6	1989	1798	2022	1531	2008	2528	1659	2349	1735	2152	1977.1
1483	72027	73227	73465	72294	74313	74373	72047	73525	79953	70064	73528.8	1996	1804	2028	1531	2011	2533	1671	2350	1738	2162	1982.4
1484	72307	73468	73720	72537	74550	74639	72293	73764	80230	70325	73783.3	2002	1807	2036	1538	2013	2539	1680	2356	1746	2173	1989
1485	72566	73687	73962	72785	74821	74871	72550	74025	80510	70569	74034.6	2009	1812	2042	1539	2024	2543	1689	2363	1745	2182	1994.8
1486	72829	73978	74224	73039	75076	75090	72783	74282	80782	70801	74288.4	2016	1817	2048	1545	2033	2549	1694	2375	1746	2189	2001.2
1487	73041	74243	74479	73283	75358	75337	73022	74532	81042	71069	74540.6	2025	1821	2049	1551	2034	2556	1698	2386	1752	2192	2006.4
1488	73288	74497	74725	73527	75597	75586	73268	74801	81312	71346	74794.7	2034	1830	2053	1558	2042	2572	1701	2389	1753	2207	2013.9
1489	73539	74753	74951	73767	75887	75875	73538	75052	81585	71622	75056.9	2034	1834	2062	1562	2058	2576	1705	2398	1762	2214	2020.5
1490	73773	74988	75223	74052	76153	76143	73781	75286	81871	71851	75312.1	2049	1836	2067	1568	2065	2586	1713	2400	1767	2219	2027
1491	74021	75231	75499	74308	76412	76406	74030	75529	82136	72123	75569.5	2053	1838	2073	1573	2069	2592	1724	2405	1774	2229	2033
1492	74281	75456	75755	74568	76682	76657	74313	75790	82424	72349	75827.5	2061	1840	2081	1580	2075	2600	1729	2410	1781	2236	2039.3
1493	74536	75713	76014	74810	76945	76924	74560	76031	82676	72597	76080.6	2065	1847	2092	1584	2077	2609	1740	2416	1782	2239	2045.1
1494	74773	75944	76310	75077	77182	77193	74808	76291	82955	72872	76340.5	2072	1857	2098	1588	2085	2616	1743	2425	1789	2242	2051.5
1495	75017	76234	76576	75344	77443	77470	75076	76551	83257	73110	76607.8	2080	1861	2105	1592	2089	2622	1750	2430	1794	2243	2056.6
1496	75308	76500	76834	75624	77721	77694	75341	76833	83528	73376	76875.9	2086	1866	2110	1596	2096	2628	1755	2434	1799	2250	2062
1497	75559	76755	77079	75906	78033	77984	75643	77098	83811	73623	77149.1	2094	1869	2114	1601	2102	2643	1762	2439	1808	2253	2068.5
1498	75806	77027	77323	76173	78293	78263	75877	77365	84101	73856	77408.4	2103	1881	2118	1609	2109	2649	1766	2445	1816	2257	2075.3
1499	76063	77305	77621	76452	78556	78512	76139	77613	84401	74096	77675.8	2109	1885	2125	1611	2117	2657	1770	2447	1818	2265	2080.4
1500	76353	77572	77938	76750	78795	78794	76398	77914	84677	74352	77954.3	2113	1893	2130	1615	2121	2668	1773	2458	1822	2274	2086.7
1501	76634	77830	78198	77024	79089	79067	76647	78187	84957	74610	78224.3	2116	1897	2146	1625	2132	2678	1775	2467	1826	2285	2094.7
1502	76872	78103	78450	77305	79387	79331	76915	78472	85259	74868	78496.2	2125	1898	2151	1634	2144	2682	1782	2474	1832	2291	2101.3
1503	77131	78364	78730	77583	79640	79598	77190	78738	85539	75138	78765.1	2131	1899	2152	1642	2159	2691	1790	2482	1838	2300	2108.4
1504	77403	78624	78966	77873	79888	79861	77450	78976	85872	75397	79031	2136	1911	2155	1647	2170	2703	1794	2486	1840	2307	2114.9
1505	77678	78907	79240	78136	80148	80161	77708	79262	86192	75647	79307.9	2144	1917	2166	1652	2174	2713	1803	2493	1843	2312	2121.7
1506	77918	79189	79533	78432	80444	80438	77989	79555	86481	75909	79588.8	2154	1925	2175	1657	2179	2718	1804	2501	1849	2318	2128
1507	78163	79469	79783	78696	80733	80743	78251	79857	86779	76166	79864	2160	1927	2177	1664	2189	2725	1814	2517	1856	2322	2135.1
1508	78406	79754	80062	78972	81007	81009	78565	80126	87066	76429	80139.6	2165	1935	2179	1672	2200	2730	1817	2526	1858	2325	2140.7
1509	78709	80031	80332	79235	81255	81320	78839	80408	87384	76693	80420.6	2171	1939	2195	1676	2210	2739	1820	2543	1861	2329	2148.3
1510	78964	80323	80609	79544	81558	81607	79109	80708	87714	76947	80708.3	2173	1943	2201	1675	2217	2750	1827	2554	1868	2335	2154.3
1511	79235	80587	80865	79802	81857	81881	79375	80961	88023	77209	80979.5	2181	1950	2217	1679	2226	2761	1831	2561	1875	2349	2163
1512	79524	80891	81150	80060	82159	82169	79638	81212	88325	77478	81260.6	2181	1958	2221	1680	2235	2769	1837	2565	1884	2353	2168.3
1513	79799	81180	81414	80338	82449	82440	79883	81479	88579	77762	81532.3	2188	1967	2229	1684	2244	2774	1845	2574	1889	2356	2175
1514	80104	81494	81677	80615	82736	82724	80156	81771	88920	78018	81821.5	2195	1973	2234	1685	2255	2782	1848	2583	1897	2368	2182
1515	80376	81778	81925	80883	82977	83000	80446	82034	89219	78263	82090.1	2196	1978	2245	1687	2267	2792	1851	2588	1904	2372	2188
1516	80657	82033	82212	81164	83266	83298	80710	82317	89553	78524	82373.4	2200	1988	2254	1692	2276	2796	1859	2592	1908	2375	2194
1517	80955	82324	82518	81453	83530	83588	81011	82594	89831	78796	82660	2206	1991	2261	1696	2276	2810	1862	2597	1911	2383	2199.3
1518	81242	82582	82789	81727	83798	83874	81280	82835	90138	79091	82935.6	2214	1999	2268	1702	2285	2819	1871	2607	1918	2389	2207.2
1519	81543	82888	83083	81992	84123	84160	81575	83150	90440	79336	83229	2219	2004	2277	1705	2293	2826	1872	2622	1923	2398	2213.9
1520	81825	83182	83396	82281	84435	84467	81843	83441	90734	79597	83520.1	2225	2011	2276	1712	2299	2836	1878	2630	1925	2405	2219.7
1521	82091	83465	83715	82546	84740	84765	82134	83752	91070	79862	83814	2231	2018	2283	1716	2304	2846	1880	2637	1926	2412	2225.3
1522	82382	83743	83996	82845	85053	85059	82432	84028	91377	80133	84104.8	2232	2023	2291	1724	2306	2854	1887	2647	1932	2420	2231.6
1523	82688	84045	84277	83120	85356	85340	82725	84347	91708	80416	84402.2	2239	2025	2296	1731	2317	2860	1891	2654	1938	2428	2237.9
1524	82950	84350	84574	83405	85651	85647	83003	84658	92029	80719	84698.6	2249	2032	2302	1736	2324	2868	1894	2658	1944	2434	2244.1
1525	83240	84622	84843	83692	85948	85955	83282	84977	92361	80999	84991.9	2260	2035	2307	1741	2332	2877	1898	2669	1947	2447	2251.3
1526	83509	84913	85133	83969	86252	86274	83550	85265	92700	81312	85287.7	2260	2038	2321	1744	2338	2882	1904	2678	1954	2456	2257.5
1527	83781	85171	85411	84257	86533	86569	83847	85552	93008	81565	85569.4	2265	2046	2326	1746	2341	2892	1908	2687	1962	2463	2263.6
1528	84092	85479	85702	84539	86846	86894	84145	85889	93333	81845	85876.4	2268	2055	2333	1750	2346	2897	1910	2696	1970	2464	2268.9
1529	84363	85783	86004	84810	87122	87193	84448	86184	93658	82112	86167.7	2271	2061	2336	1753	2358	2909	1914	2700	1976	2476	2275.4
1530	84635	86062	86343	85112	87426	87514	84762	86491	93979	82368	86469.2	2275	2068	2341	1754	2365	2921	1920	2705	1982	2481	2281.2
1531	84897	86349	86646	85448	87696	87837	85086	86791	94316	82663	86772.9	2275	2076	2346	1759	2372	2927	1924	2713	1988	2487	2286.7
1532	85185	86654	86907	85763	88002	88127	85382	87096	94679	82961	87075.6	2287	2080	2350	1764	2378	2938	1926	2720	1992	2503	2293.8
[truncated: 467 more rows]

## Sheet: Control+p53 RNAi (MNNG5)(d)
Control-sim (480 cells)+p53 RNAi-sim (20 cells) > MNNG5-sim+p53 RNAi-MNNG5-sim
[truncated: 2,002 more rows]

## Sheet: Control+p53 RNAi (MNNG6)(e)
Control-sim (480 cells)+p53 RNAi-sim (20 cells) > MNNG6-sim+p53 RNAi-MNNG6-sim
[truncated: 2,002 more rows]

[truncated: 4 more sheets: Control+p53 RNAi (MNNG7)(f), % of p53 silenced cells (g), Statistics (g), Repeated treatment (h)]
